# Supplementary material
Source: PubMed Central journal article supplement (PMC3499051)
Supplement: supp_bgs148_lung_cancer_exome-Suppl-Data-R1.pdf [file supp_bgs148_lung_cancer_exome-Suppl-Data-R1.pdf]

# IDENTIFICATION OF SOMATIC MUTATIONS IN NON-SMALL CELL LUNG CARCINOMAS USING WHOLE-EXOME SEQUENCING

Pengyuan Liu<sup>1\*</sup>, Carl Morrison<sup>2\*</sup>, Liang Wang<sup>3\*</sup>, Donghai Xiong<sup>4\*</sup>, Peter Vedell<sup>4\*</sup>, Peng Cui<sup>4\*</sup>, Xing Hua<sup>1\*</sup>, Feng Ding<sup>4</sup>, Yan Lu<sup>1</sup>, Michael James<sup>4</sup>, John Ebben<sup>4</sup>, Haiming Xu<sup>1</sup>, Alex A. Adjei<sup>2</sup>, Karen Head<sup>2</sup>, Jaime W. Andrae<sup>1</sup>, Michael R. Tschannen<sup>1</sup>, Howard Jacob<sup>1</sup>, Jing Pan<sup>4</sup>, Qi Zhang<sup>4</sup>, Françoise Van den Bergh<sup>4</sup>, Haijie Xiao<sup>4</sup>, Ken C. Lo<sup>5</sup>, Jigar Patel<sup>5</sup>, Todd Richmond<sup>5</sup>, Mary-Anne Watt<sup>5</sup>, Thomas Albert<sup>5</sup>, Rebecca Selzer<sup>5</sup>, Marshall Anderson<sup>6</sup>, Jiang Wang<sup>7</sup>, Yian Wang<sup>8</sup>, Sandra Starnes<sup>9</sup>, Ping Yang<sup>3\*</sup>, Ming You<sup>4,10\*</sup>

<sup>1</sup>Department of Physiology and the Cancer Center, Medical College of Wisconsin, Milwaukee, WI 53226, USA; <sup>2</sup>, Roswell Park Cancer Institute, Buffalo, New York 14263, USA; <sup>3</sup>Department of Health Science Research, Mayo Clinic, Rochester, Minnesota 55905, USA; <sup>4</sup>Department of Pharmacology and Toxicology and the Cancer Center, Medical College of Wisconsin, Milwaukee, WI 53226, USA; <sup>5</sup>Roche NimbleGen Research and Development, Madison, WI 53719, USA; <sup>6</sup>Department of Medicine and the Cancer Center, Medical College of Wisconsin, Milwaukee, WI 53226, USA; <sup>7</sup>Department of Pathology, University of Cincinnati College of Medicine, Cincinnati, Ohio 45267, USA; <sup>8</sup>Department of Surgery, Washington University in St. Louis, St. Louis, MO 63110, USA; <sup>9</sup>Department of Surgery, University of Cincinnati College of Medicine, Cincinnati, Ohio 45267, USA. \*These authors contributed equally.

<sup>10</sup>Correspondence:

Ming You

Medical College of Wisconsin

8701 Watertown Plank Road

Milwaukee, WI 53226

Phone: 414-955-2565; Fax: 414-955-6058; Email: [myou@mcw.edu](mailto:myou@mcw.edu).

## SUPPLEMENTARY DATA

### Full Methods

### References

### Supplemental Figures

**Supplementary Figure 1. Number of SNVs across the samples.** (A) ADC and SCC; (B) smokers and nonsmokers

**Supplementary Figure 2. dN/dS across the samples.** (A) ADC and SCC; (B) smokers and nonsmokers.

**Supplementary Figure 3. Somatic single-nucleotide mutation trends and patterns in lung cancer.**

Distribution of specific nucleotide changes among germline and somatic variations in the lung cancer exome was present for different histology (ADC and SCC) and smoking status (SMK and NonSMK).

**Supplementary Figure 4. Somatic mutations in CSMD3.** (A) Image from Ensemble website; arrows point to approximate location of mutations and are color index by sample. (B) Locations of somatic mutations in protein domain.

**Supplementary Figure 5. The meaning of symbols in protein network.**

### Supplemental Tables

Supplementary Table 1. Clinical characteristics of 31 lung cancer samples in the exome sequencing study

Supplementary Table 2. Sequence reads and coverages among 31 pairs of matched normal and tumor samples

Supplementary Table 3. Summary of Somatic SNVs in 31 lung cancer samples

Supplementary Table 4. All somatic SNVs in 31 lung cancer genomes.

Supplementary Table 5. Somatic SNVs validated by the Sanger resequencing

Supplementary Table 6. Concordance of genotypes from the HapMap project and from the NimbleGen platform

Supplementary Table 7. Somatic SNVs validated by the NimbleGen genotyping platform

Supplementary Table 8. All somatic SNVs in protein coding regions in 31 lung cancer genomes

Supplementary Table 9. Missense mutations predicted to affect protein function

Supplementary Table 10. Comparison of the somatic SNVs from our exomes with the COSMIC database

Supplementary Table 11. Mutated genes common in both ADC and SCC

Supplementary Table 12. Mutated genes specific in ADC

Supplementary Table 13. Mutated genes specific in SCC

Supplementary Table 14. Summary of Mutated Sample Gene-Set Enrichment Analysis

Supplementary Table 15. Mutation Type Distribution by Gene Set

Supplementary Table 16. Core Cancer Pathway Summary Statistics

Supplementary Table 17. Drug x Druggable Targets Matrices

- a. Drug x Druggable Targets
- b. Cancer Drug x Druggable Targets
- c. Lung Cancer Drug x Druggable Targets

## **Full Methods**

### **Lung tumor histology**

Thirty-one pairs of lung tumors and matched normal tissues were analyzed, including 16 adenocarcinomas, 12 squamous cell carcinomas, 1 adenosquamous carcinoma, 1 Bronchioloalveolar carcinoma (BAC), and 1 adenocarcinoma with BAC (**Supplementary Table 1**). Five samples are from never smokers and the others are from smokers. Five patients have at least one first-degree relative with lung cancer, and the other 26 patients do not have family history of lung cancer. The study protocols were approved by Roswell Park Cancer Institute and Mayo Clinic Institute Review Boards.

### **DNA sample preparation**

Tumor tissues were micro-dissected to identify areas of adequate tumor cellularity (>70%) for DNA extraction. Genomic DNA samples for exome sequencing were extracted from lung tumors and matched normal tissues. Primary tumor tissues were sectioned, stained with routine hematoxylin and eosin, and reviewed by pathologists to identify areas of adequate tumor cellularity. Only tumor tissues with at least 70% tumor cells were used in this study.

### **Library preparation**

Paired-end libraries were prepared following the manufacturer's protocol (Illumina and Agilent). Briefly, 3 ug of genomic DNA was fragmented to 150-200 bp using the Covaris E210 sonicator. The ends were repaired, and an "A" base was added to the 3' ends. Paired end DNA adaptors (Illumina) with a single "T" base overhang at the 3' end were ligated and the resulting constructs were purified using AMPure SPRI beads from Agencourt. The adapter-modified DNA fragments were enriched by 4 cycles of PCR using PE 1.0 forward and PE 2.0 reverse (Illumina) primers. The concentration and size distribution of the libraries was determined on an Agilent Bioanalyzer DNA 1000 chip.

### **Capture of target genome**

Whole exon capture was carried out using the protocol for Agilent's SureSelect Human All Exon kit (38MB). Five hundred ng of the prepped library was incubated with whole exon biotinylated RNA capture baits supplied in the kit for 24 hours at 65 °C. The captured DNA:RNA hybrids were recovered using Dynabeads MyOne Streptavidin T1 from Dnal. The DNA was eluted from the beads and desalted using Qiagen MinElute PCR purification columns. The purified capture products were then amplified using the SureSelect GA PCR primers (Agilent) for 12 cycles.

### **Massively parallel sequencing**

Sequencing was carried out for the captured libraries with the Illumina Genome Analyzer IIx platform (GAIIx) using 75 bp paired-end reads (3 samples) and with HiSeq 2000 using 100 bp paired-end reads. Libraries were loaded onto paired end flow cells at concentrations of 6-8 pM (GAIIx) or 4-5 pM (HiSeq 2000) to generate cluster densities of 250,000-350,000/tile (GAIIx) or 300,000-500,000/mm<sup>2</sup> (HiSeq 2000) following Illumina's standard protocol using the Illumina cluster station and Paired end cluster kit version 4 (GAIIx) or the Illumina cBot and HiSeq Paired end cluster kit version 1 (HiSeq 2000). To achieve high level of sensitivity and accuracy for detecting all the mutations in the whole exome, each sample was sequenced at the depth of, on average, 123X (Supplementary Table 2). Image analysis and base calling were carried out by Illumina Software CASAVA with default parameters.

### **Quality control**

After the next-generation sequencing is done, the Illumina analysis tool CASAVA was used to process the raw sequencing data. The resulting Eland alignment from Illumina pipeline was used to estimate an error rate for each read/cluster. If a sequencing run/lane had an error rate above 2%, the run will be considered a failure and the data will not be used. The quality of the sequencing runs was also assessed by evaluating the percentage of clusters passing filtering criteria and the percentage of reads that can be aligned to the reference genome. For a typical run, over 70% of clusters pass filter and over 80% align. Any major deviations from these values would trigger further evaluation (average intensity, error graphs, etc) and likely lead to the abandon of these runs/lanes for study. Short reads data in the FASTQ format that passed quality control were then processed by our in-house analysis pipeline for the identification of important somatic mutations underlying lung carcinogenesis.

## ***Read mapping and alignment and variant analysis***

We recently developed an in-house analysis pipeline for cancer genome sequencing data. This pipeline essentially includes 1) Mapping and alignment, 2) SNVs and indels discovery, and 3) SNVs and indels filtering and annotation. Briefly, once the raw sequence data was created, the output short reads were aligned to a reference genome (NCBI human genome assembly build 36) using the BWA [1]. Each alignment was assigned a mapping quality score by BWA, which is the Phred-scaled probability that the alignment is incorrect. The PCR duplicates were detected and removed by Picard (<http://picard.sourceforge.net>). After alignment, we used the SomaticSniper (<http://genome.wustl.edu/software/somaticsniper>) and VarScan [2] to call SNV for each chromosomal position. We defined high-quality SNVs as those detected both by SomaticSniper with Somatic Score 60 and SNP mapping quality 60 and by VarScan with somatic p value 0.05. To minimize false positives, we also set minimum coverage as 8X in normal and 15X in tumor, minimum reads of variant allele as 4 and minimum proportion of variant allele as 15% in tumor. We also filter by minimum number of 2 reads supporting the variant allele per strand. For indels called from VarScan, we further remove them with any support reads from its matched normal control.

The lists of SNVs/indels were finally annotated by using ANNOVAR (<http://www.openbioinformatics.org/annovar/>). ANNOVA is software to utilize update-to-date information to functionally annotate genetic variants detected from diverse genomes. We first filtered SNVs/indels by various public databases including dbSNP, 1000 genomes, HapMap exome Project and 200 Danish exome [3]. After filtering, these novel SNVs/indels were subject to annotation using NCBI, UCSC and Ensembl databases. For SNVs, we also used SIFT software to predict whether an amino acid substitution affects protein function so that users can prioritize SNVs for further study (<http://blocks.fhcrc.org/sift/SIFT.html>). Finally, we prioritize these SNVs/indels into the following Tiers:

Tier1: frameshift-, missense-, nonsense-, splicing sites-mutations, and small indels in CDS

Tier2: Synonymous, ncRNA, and intronic mutations in conserved genomic regions

Tier3: SNVs/indels in non-repeat masked regions

Tier4: All remaining SNVs/indels.

## ***Identification of driver mutations***

At the gene level, we determined if a somatic gene has significantly higher mutation rate in nonsynonymous changes than in synonymous changes. We recently introduced the Poisson processes used to model the random nature of mutation under no selection pressure (X Hua et al, manuscript in preparation). The proposed approach is applicable to both gene- and pathway-based analysis and possesses two prominent properties: 1) account for protein coding size of gene, and 2) consider individual background mutation rate. Briefly, somatic mutations are classified into silent, missense, nonsense and splicing mutations; each of mutations are further classified into nine of nucleotide types based on the base of interest and its flanking bases and location of CpG islands. For each mutation type, we calculate the number of base pairs in the coding sequence of a gene that can give rise to nonsynonymous and synonymous changes. Background mutation rates were first estimated for each individual by empirical Bayes methods which borrow information from all the samples. Then, the mutation rates for nonsynonymous changes were obtained by maximum likelihood estimation and were further tested by likelihood ratio and score tests. Since the number of mutations for individual gene is small, we combine all nonsynonymous mutations into one category in the statistical analysis.

At the individual mutation level, we used four new and popular algorithms (SIFT[4], Polyphen2[5], LRT[6] and MutationTaster[7]), along with a conservation score (PhyloP)[8] to predict if a nonsynonymous SNP affects its protein function. These four algorithms use different information and are based on different training data; each has its own strength and weakness. The prediction scores from these algorithms were recently compiled in the database dbNSFP (<http://sites.google.com/site/jpopgen/dbNSFP>). To make a more reliable prediction, we used majority vote standard to identify putative driver mutations. That is, a driver mutation needs to fulfill two requirements: 1) a nonsynonymous SNP is located within a conserved site (i.e.,  $\text{phyloP}_{\text{new}} > 0.95$ ), and 2) a nonsynonymous SNP is predicted by at least three of four algorithms to affect protein function. In each prediction algorithm, we used default thresholds to define deleterious/damaging nonsynonymous SNPs.

### ***Exome-seq coverage (sequencing depth) quantification***

Using the exomic sequencing data of the 31 tumor-normal pairs of lung cancer patients, we applied SeqGene package (<http://sourceforge.net/projects/seqgene/files/>) to run the calculation of coverage statistics for the whole exome of each sequenced sample. The quality control report yielded by SeqGene

includes the coverage statistics for exon capture experiments, the percentage of reads that covers target exons (specificity) and coverage quantile across all exons (sensitivity). Specifically, the 'sam2wig' function efficiently converts the alignment file into the per-base resolution coverage file in '.wig' format. For exome-Seq, the 'exon\_qc' function report all the missing and defective regions with poor coverage, the quantile of the average exon coverage across exome (coverage sensitivity) and the percentage of total mapped reads aligned onto target exon regions (coverage specificity). The coverage statistics for 31 tumor-normal pairs of this project are summarized in Supplemental Table 2. The exome capture and sequencing results are within the normal range of performance specified by the manufacturer and are comparable with published results using the same technology [9].

### ***Comparison of exome sequencing to the COSMIC database of cancer mutations***

We downloaded somatic mutation data from the latest Sanger COSMIC database v53 release (<http://www.sanger.ac.uk/genetics/CGP/cosmic/>) and compare with our exome sequencing results for the 31 tumor-normal pairs. The comparison is done in the following two ways. First we checked whether the somatic mutated genes we identified were also reported by COSMIC previously (not limited to cancer types). Second we checked whether the exact somatic mutations we identified were also in COSMIC database.

### ***Pathway and protein interaction network analyses***

The analysis of the mutations by pathways and groups consists of several components. The first component is gene-based gene-set enrichment analysis for selected pathways reported to be significant for cancer and particularly lung cancer. For this component, we determined the number of genes mutated by type (silent vs non-silent, critical vs silent) and the number of mutated samples across our samples in previously defined 'core cancer' pathways [10], published lung cancer pathways, and several hundred other gene sets of the GeneGo MetaCore database [11-14]. We measured the significance for each category in terms of difference between the observed and expected ratios of nonsynonymous mutations to synonymous mutations by pathway or category. A p-value was computed based on a binomial distribution.



The second component is patient-based gene-set enrichment and pathway analysis using the method introduced in Boca et al [15] and applied in Parsons et al (2011) with the permutation null without heterogeneity approach for assessing significance [16]. This approach was applied to the gene sets described above and other gene sets of the GeneGo MetaCore database [14]. We also applied this method to the critical mutations. The critical mutations are defined as the nonsense, frameshift, and missense mutations that are predicted to affect protein function (SIFT scores < 0.05).

Lastly, we generated networks of selected genes (as defined in the Results section). Direct interaction protein networks were generated for the frequently mutated genes in common between ADC and SCC, the genes only mutated in ADC, and the genes only mutated in SCC. We also generated a network with both direct and indirect interactions for the driver genes mutated in both ADC and SCC that do not have known direct interactions with the other commonly mutated genes. The networks were generated using the GeneGo MetaCore software [14]. With regard to the gene selection as input for these algorithms, for commonalities between ADC and SCC, we selected all those genes with 3 or more non-silent mutations of at least two subtypes as well as those genes with a critical mutation as defined above in each subtype and which belongs to one of the top 25 scoring pathways based on the critical mutation definitions (219 genes). We created direct interaction networks for the protein products of these genes. We similarly created direct interaction protein network for SCC-only mutated genes and genes of frequently mutated pathways for which mutations were observed only in SCC (158 genes) and for the ADC-only mutated genes (106 genes) and genes of frequently mutated pathways for which mutations were observed only in ADC. The driver genes include p53, 6 genes that interact as component of olfactory receptor. For the remaining driver genes which had little or no direct interaction with other mutated genes, we applied a 'direct and indirect interactions' algorithm, the GeneGo 'Analyze Network' algorithm. This network was created by merging the top 3 network found by the GeneGo 'Analyze Network' algorithm. It starts with seed nodes as proteins from the input gene list and adds other genes up to a max of 50 prior to merging. All the proteins from the input gene list are in this merged network.

### ***Sanger validation***

To valid the somatic mutations that were identified by high-through put sequencing technology, we further performed Sanger sequencing using ABI 3730 sequencer. We selected 670 somatic mutations

from 31 tumors and designed specific primers (supplementary file) around the mutations for PCR and sequencing reaction.

The standard PCR was conducted in a 25  $\mu$ l reaction volume that contains 1–2 U Taq DNA polymerase, 10 mM Tris-HCl (pH 8.3), 0.25 mM dNTPs, 0.2–2 mM BSA, 1.5–2.5 mM MgCl<sub>2</sub>, 20 pM of each primer, and about 10 ng camel genome DNA. The PCR reaction conditions were set as: 94°C for the first 5 min, followed by 35 cycles of 94°C denaturation for 30s, 50°C annealing for 30s, and 72°C extension for 45s. The PCR were accompanied by negative controls containing the reaction solutions without DNA. The thermo-cycling sequencing reaction was performed in a final volume of 24  $\mu$ l containing 16  $\mu$ l DYEnamic ET Terminator Sequencing Kit premix, 10 pM sequencing primers, and 500  $\mu$ g DNA. The reaction conditions were 95°C for 2 min, followed by 35 cycles of 95°C denaturation for 15s, 50°C annealing for 15s, and 60°C extension for 90s. The amplified DNA fragments were sequenced on ABI-3730 DNA sequencer. The primers for PCR reaction were used for sequencing. DNA sequences were assembled by using the software package sequencher on a windows platform.

### ***NimbleGen genotyping platform***

**Preparation of DNA samples** Detailed description of the AccuSNP™ genotyping assay can be found in the NimbleGen AccuSNP™ User's Guide version 1. Briefly, 1 $\mu$ g of genomic DNA was denatured at 98°C with 1.25 O.D. of random nonamers in AccuSNP™ WGA Kit reaction buffer. The denatured sample was chilled on ice, and then incubated with 100 units of (exo<sup>-</sup>) Klenow fragment and dNTP mix for 2 hours at 37°C. Reaction was terminated by incubation at 75°C for 20 minutes. Fragmentation of DNA was accomplished by adding acetic acid to the amplified DNA to a final concentration of 0.05M and incubated for 22 minutes at 95°C. The sample was chilled on ice for 2 minutes prior to adding NaOH to a final concentration of 0.12M. The sample was then incubated for 40 minutes at 95°C. The ends of the fragmented DNA was dephosphorylated by incubating with 40U of alkaline phosphatase for 1 hour at 50°C. The DNA sample was then purified using a Roche AccuSNP DNA purification kit, with the following modifications. 296.4 $\mu$ l of Binding Buffer was added to the DNA, followed by the addition of 444.6 $\mu$ l of Binding Enhancer. The DNA sample was added to the High Pure Filter Tube, washed and eluted in 50 $\mu$ l of Elution Buffer as per manufacturer's instruction. Fragment sizes were verified to be 25-125bp using gel electrophoresis. End labeling was accomplished by incubating 75 $\mu$ g of amplified and fragmented DNA sample with 0.16mM biotin-16-dUTP and 800U of recombinant terminal transferase for 1 hour at

37°C. The reaction was terminated by heating to 95°C for 2 minutes, followed the addition of 1µL of 0.5M EDTA. The labeled DNA was purified using a Roche High Pure DNA purification kit as described above, except using 200µL of Binding Buffer and 300µL of Binding Enhancer. All other steps were performed as per manufacturer's instruction. Labeling efficiency was assessed using a gel-shift assay with streptavidin.

**Microarray Hybridization** 50µg of sample was rehydrated in 10µl of NimbleGen Hybridization Buffer (Roche NimbleGen), denatured at 95°C for 5 min, and then cooled to 42°C. Hybridizations were carried out for 18 hours at 42°C in the NimbleGen Hybridization System. The arrays were washed using a NimbleGen Wash Buffer System and immediately dried by centrifugation.

**Enzymatic Treatment and Staining** Hybridized array was blocked with 3X casein for 10 minutes at room temperature prior to incubation with a flap endonuclease and DNA Ligase in AccuSNP™ array buffer at 50°C for 1 hour. The arrays were washed using a NimbleGen Wash Buffer System and then incubated in 98°C water for 2 minutes. The microarray was blocked with 3X casein for 10 minutes at room temperature prior to staining. Staining was performed by adding the following solutions to the flow through chamber containing the array and incubating at room temperature for 10 minutes after addition of each reagent (1) 3mL of blocking/wash buffer (2) 2mL of streptavidin-Cy3 solution (3) 3mL of blocking/wash buffer (4) 1mL of anti-streptavidin solution (5) 3mL of blocking/wash buffer. Steps 2-5 are repeated 2 more times prior to a final addition of 2mL of streptavidin-Cy3. The array was washed in 1X PBS for 2 minutes, followed by a water wash for 5 seconds, and immediately dried by centrifugation. Arrays are scanned at 2 µm in a Roche NimbleGen MS200 scanner.

### ***Cell Culture and shRNA Knockdown***

Beas-2b cells were cultured in complete BEGM with supplements (Lonza, Basel, Switzerland) on tissue culture dishes coated with 10ug/ml fibronectin, 30ug/ml bovine collagen type I, and 10ug/ml BSA. Cells were transduced with lentiviral short-hairpin RNA (shRNA) vectors based on the pLKO.1 vector and designed to specifically target human CSMD3 transcript (Open Biosystems, Huntsville, AL). Empty vector or vector knocking down CSMD3 transcript were first packaged in 293T cells (Orbigen, San Diego, CA) with helper plasmids and then transduced into A549 cells with 8 µg/ml Polybrene (Sigma, St. Louis, MO). Media was replaced 24 hours after transduction, and cells were split 1:4 48 hours after transduction. At

72 hours post transduction, cells harboring lentiviral constructs were selected with 1  $\mu$ g/ml puromycin for 2-4 days, until mock infected cells were dead. Resulting foci and plates were photographed. Foci and pooled cells were harvested by trypsinization and propagated in culture.

### ***RT-Quantitative Real-Time PCR***

One microgram of total RNA per sample was converted to cDNA using the BioRad iScript Kit. Quantitative RT-PCR assay was done using the Ssofast SYBR Green PCR Master Mix (BioRad, Hercules, CA). One microliter of cDNA was added to a 20  $\mu$ L total volume reaction mixture containing water, SYBR Green PCR Master Mix, and primers. Each real-time assay was done in triplicate on a BioRad CFX96 machine. The  *$\beta$ -actin* gene (*Actb*) was used as an internal control to compute the relative expression level ( $\Delta C_T$ ) for each sample. Primer set efficiency and linearity was calculated, and normalization was performed in accordance with MIQE guidelines. The fold change of transcript accumulation in cells with knockdown as compared to vector control cells was calculated as  $2^d$ , where  $d = \Delta C_{T \text{ control}} - \Delta C_{T \text{ knockdown}}$ .

### ***MTS Proliferation Assay***

Cells were seeded onto 12-well tissue culture dishes at a density of 5000 cells per well. Cells were assayed for viable cell numbers in triplicate by adding 100ul per well of the MTS based CellTiter 96 AQueous One Solution Cell Proliferation reagent (Promega, Madison, WI), and measuring A490 on a plate reader over 8 days in culture.

## References

1. Li, H. and Durbin, R. (2010) Fast and accurate long-read alignment with Burrows-Wheeler transform. *Bioinformatics*, **26**, 589-595.
2. Koboldt, D.C., Chen, K., Wylie, T., Larson, D.E., McLellan, M.D., Mardis, E.R., Weinstock, G.M., Wilson, R.K. and Ding, L. (2009) VarScan: variant detection in massively parallel sequencing of individual and pooled samples. *Bioinformatics*, **25**, 2283-5.
3. Li, Y., Vinckenbosch, N., Tian, G., Huerta-Sanchez, E., Jiang, T., Jiang, H., Albrechtsen, A., Andersen, G., Cao, H., Korneliussen, T., Grarup, N., Guo, Y., Hellman, I., Jin, X., Li, Q., Liu, J., Liu, X., Sparso, T., Tang, M., Wu, H., Wu, R., Yu, C., Zheng, H., Astrup, A., Bolund, L., Holmkvist, J., Jorgensen, T., Kristiansen, K., Schmitz, O., Schwartz, T.W., Zhang, X., Li, R., Yang, H., Wang, J., Hansen, T., Pedersen, O. and Nielsen, R. (2010) Resequencing of 200 human exomes identifies an excess of low-frequency non-synonymous coding variants. *Nat Genet*, **42**, 969-72.
4. Kumar, P., Henikoff, S. and Ng, P.C. (2009) Predicting the effects of coding non-synonymous variants on protein function using the SIFT algorithm. *Nat Protoc*, **4**, 1073-81.
5. Adzhubei, I.A., Schmidt, S., Peshkin, L., Ramensky, V.E., Gerasimova, A., Bork, P., Kondrashov, A.S. and Sunyaev, S.R. (2010) A method and server for predicting damaging missense mutations. *Nat Methods*, **7**, 248-9.
6. Chun, S. and Fay, J.C. (2009) Identification of deleterious mutations within three human genomes. *Genome Res*, **19**, 1553-61.
7. Schwarz, J.M., Rodelsperger, C., Schuelke, M. and Seelow, D. (2010) MutationTaster evaluates disease-causing potential of sequence alterations. *Nat Methods*, **7**, 575-6.
8. Siepel, A., K., P. and Haussler, D. (2006) New methods for detecting lineage-specific selection., *Proceedings of the 10th International Conference on Research in Computational Molecular Biology (RECOMB 2006)*, pp. 190-205.
9. Hedges, D.J., Burges, D., Powell, E., Almonte, C., Huang, J., Young, S., Boese, B., Schmidt, M., Pericak-Vance, M.A., Martin, E., Zhang, X., Harkins, T.T. and Zuchner, S. (2009) Exome sequencing of a multigenerational human pedigree. *PLoS One*, **4**, e8232.
10. Jones, S., Zhang, X., Parsons, D.W., Lin, J.C., Leary, R.J., Angenendt, P., Mankoo, P., Carter, H., Kamiyama, H., Jimeno, A., Hong, S.M., Fu, B., Lin, M.T., Calhoun, E.S., Kamiyama, M., Walter, K., Nikolskaya, T., Nikolsky, Y., Hartigan, J., Smith, D.R., Hidalgo, M., Leach, S.D., Klein, A.P., Jaffee, E.M., Goggins, M., Maitra, A., Iacobuzio-Donahue, C., Eshleman, J.R., Kern, S.E., Hruban, R.H., Karchin, R., Papadopoulos, N., Parmigiani, G., Vogelstein, B., Velculescu, V.E. and Kinzler, K.W.

- (2008) Core signaling pathways in human pancreatic cancers revealed by global genomic analyses. *Science*, **321**, 1801-6.
11. Ding, L., Getz, G., Wheeler, D.A., Mardis, E.R., McLellan, M.D., Cibulskis, K., Sougnez, C., Greulich, H., Muzny, D.M., Morgan, M.B., Fulton, L., Fulton, R.S., Zhang, Q., Wendl, M.C., Lawrence, M.S., Larson, D.E., Chen, K., Dooling, D.J., Sabo, A., Hawes, A.C., Shen, H., Jhangiani, S.N., Lewis, L.R., Hall, O., Zhu, Y., Mathew, T., Ren, Y., Yao, J., Scherer, S.E., Clerc, K., Metcalf, G.A., Ng, B., Milosavljevic, A., Gonzalez-Garay, M.L., Osborne, J.R., Meyer, R., Shi, X., Tang, Y., Koboldt, D.C., Lin, L., Abbott, R., Miner, T.L., Pohl, C., Fewell, G., Haipek, C., Schmidt, H., Dunford-Shore, B.H., Kraja, A., Crosby, S.D., Sawyer, C.S., Vickery, T., Sander, S., Robinson, J., Winckler, W., Baldwin, J., Chirieac, L.R., Dutt, A., Fennell, T., Hanna, M., Johnson, B.E., Onofrio, R.C., Thomas, R.K., Tonon, G., Weir, B.A., Zhao, X., Ziaugra, L., Zody, M.C., Giordano, T., Orringer, M.B., Roth, J.A., Spitz, M.R., Wistuba, II, Ozenberger, B., Good, P.J., Chang, A.C., Beer, D.G., Watson, M.A., Ladanyi, M., Broderick, S., Yoshizawa, A., Travis, W.D., Pao, W., Province, M.A., Weinstock, G.M., Varmus, H.E., Gabriel, S.B., Lander, E.S., Gibbs, R.A., Meyerson, M. and Wilson, R.K. (2008) Somatic mutations affect key pathways in lung adenocarcinoma. *Nature*, **455**, 1069-75.
  12. Meyerson, M. (2011) Genomic analysis of squamous cell lung cancer : implications for targeted therapy. *AACR 102nd Annual Meeting*, Orlando, Florida, USA.
  13. Seshagiri, S. (2011) Identifying, understanding, and targeting cancer somatic mutations. *AACR 102nd Annual Meeting*, Orlando, Florida.
  14. ThomsonReuters (2010) MetaCore: Pathway Analysis and Data Mining for Gene Expression. Thomson Reuters.
  15. Boca, S.M., Kinzler, K.W., Velculescu, V.E., Vogelstein, B. and Parmigiani, G. (2010) Patient-oriented gene set analysis for cancer mutation data. *Genome Biol*, **11**, R112.
  16. Parsons, D.W., Li, M., Zhang, X., Jones, S., Leary, R.J., Lin, J.C., Boca, S.M., Carter, H., Samayoa, J., Bettegowda, C., Gallia, G.L., Jallo, G.I., Binder, Z.A., Nikolsky, Y., Hartigan, J., Smith, D.R., Gerhard, D.S., Fuhs, D.W., VandenBerg, S., Berger, M.S., Marie, S.K., Shinjo, S.M., Clara, C., Phillips, P.C., Minturn, J.E., Biegel, J.A., Judkins, A.R., Resnick, A.C., Storm, P.B., Curran, T., He, Y., Rasheed, B.A., Friedman, H.S., Keir, S.T., McLendon, R., Northcott, P.A., Taylor, M.D., Burger, P.C., Riggins, G.J., Karchin, R., Parmigiani, G., Bigner, D.D., Yan, H., Papadopoulos, N., Vogelstein, B., Kinzler, K.W. and Velculescu, V.E. (2011) The genetic landscape of the childhood cancer medulloblastoma. *Science*, **331**, 435-9.

Supplementary Figure 1

(A)

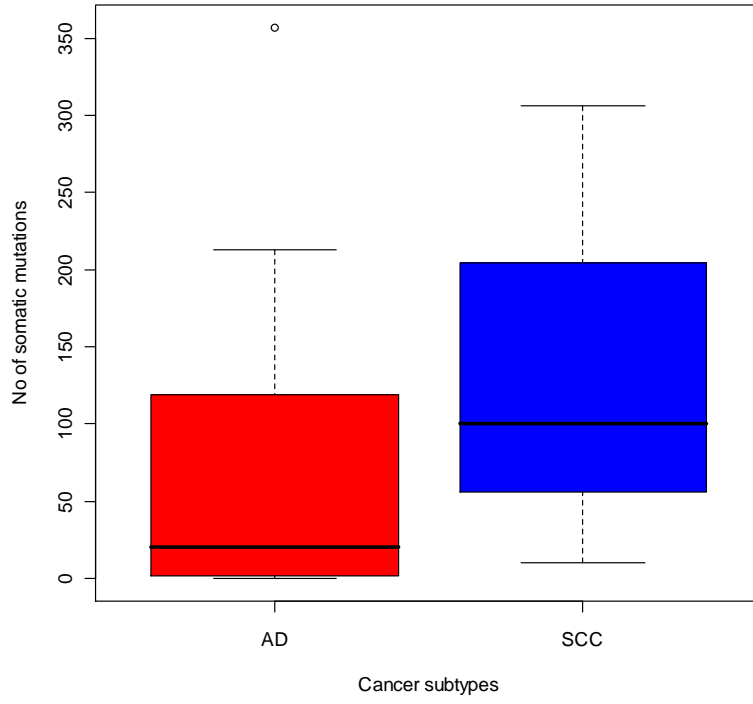

(B)

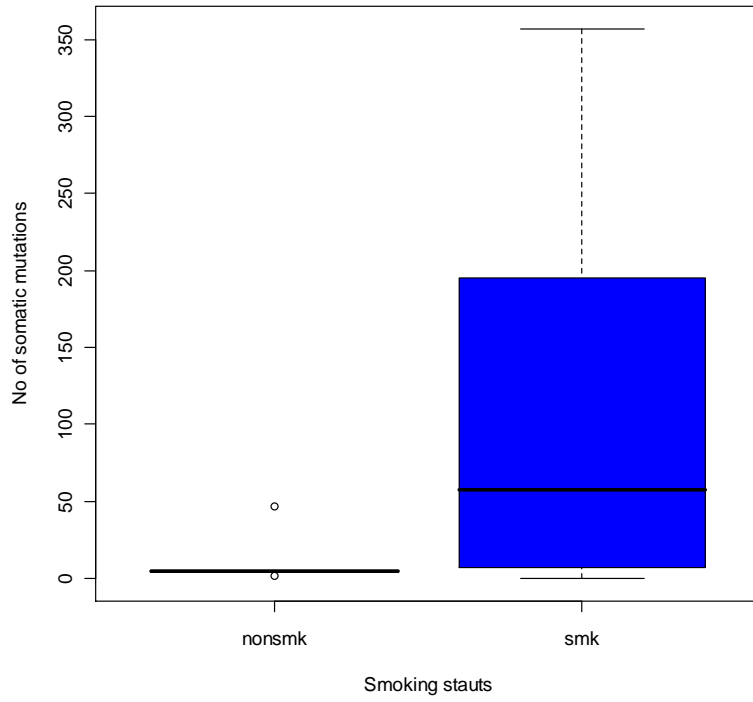

Supplementary Figure 2

(A)

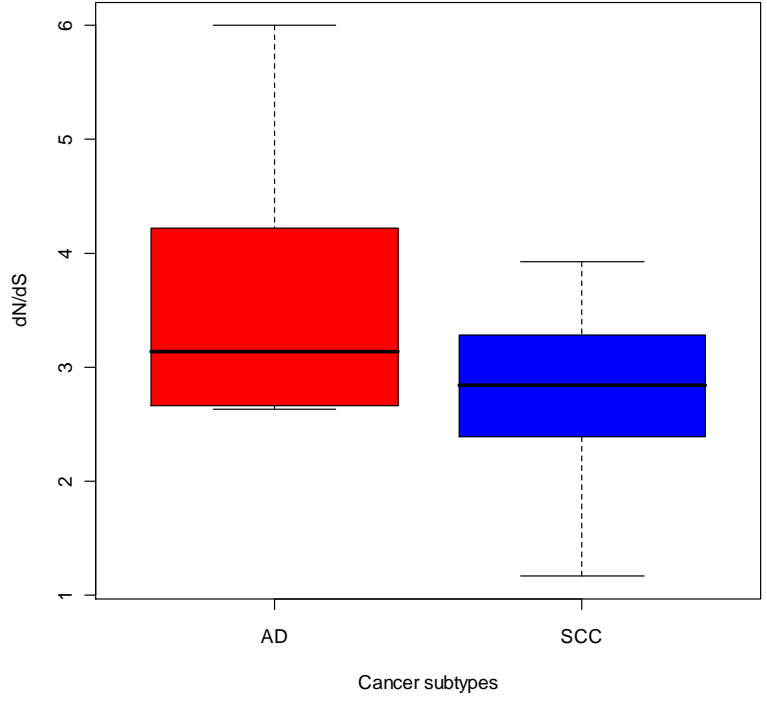

(B)

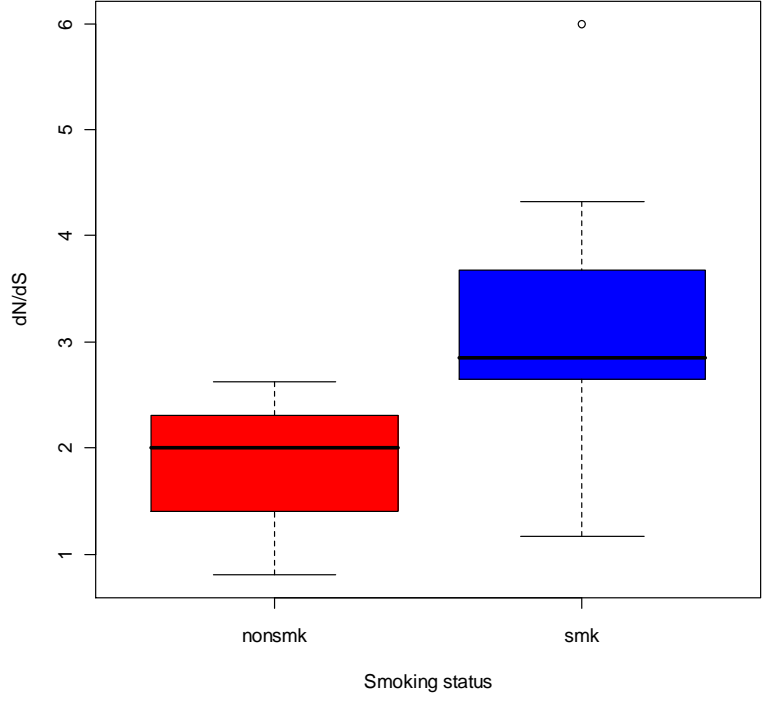



Supplementary Figure 3

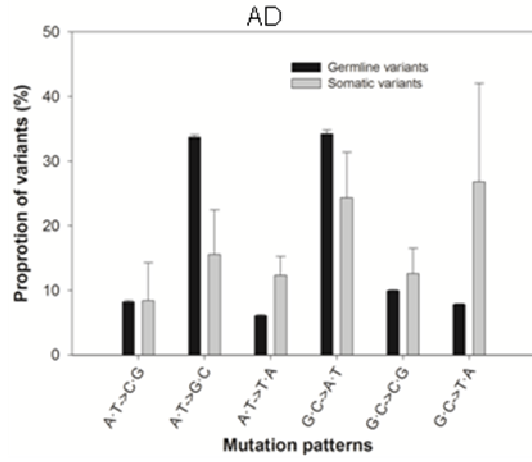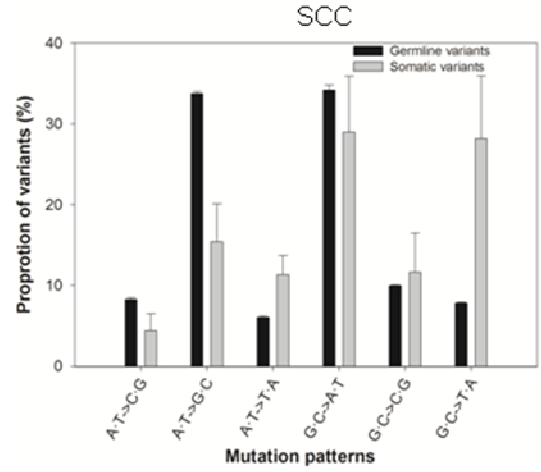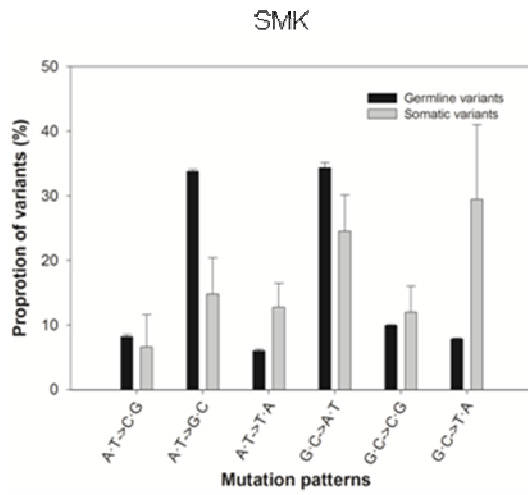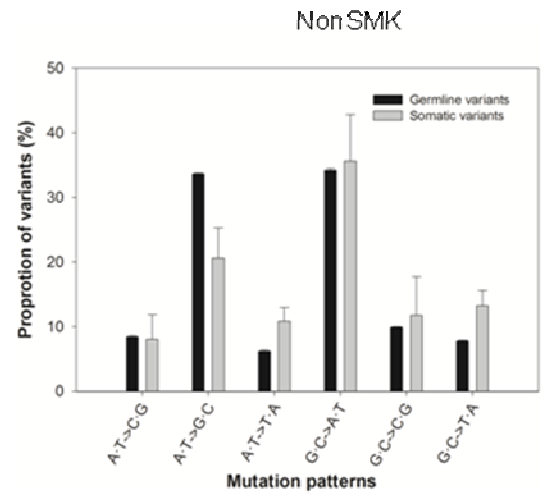

## Supplementary Figure 4

(A)

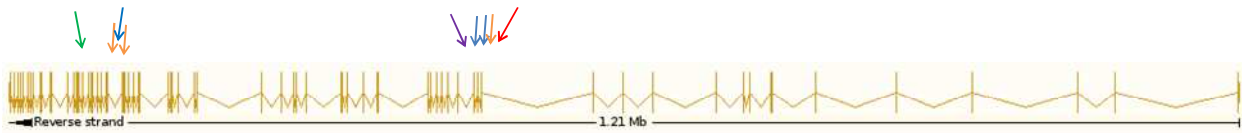

(B)

| Sample | Exon | Position  | Mutation_Type | Amino_acid | Protein_domain |
|--------|------|-----------|---------------|------------|----------------|
| 13280  | 71   | 113306313 | missense      | p.T3623S   | Transmembrane  |
| 7285   |      | 113336833 | splicing      |            |                |
| 12586  | 60   | 113346981 | missense      | p.D3135Y   | Sushi_SCR_CCP  |
| 7285   | 53   | 113383314 | missense      | p.T2735S   | Sushi_SCR_CCP  |
| 12820  | 21   | 113720196 | missense      | p.T1104K   | CUB            |
| 15145  | 20   | 113726543 | missense      | p.T1054K   | Sushi_SCR_CCP  |
| 12820  | 18   | 113737583 | missense      | p.N954D    | CUB            |
| 7285   | 17   | 113747682 | missense      | p.R835T    | Sushi_SCR_CCP  |
| 13542  | 15   | 113767075 | missense      | p.G700W    | Sushi_SCR_CCP  |

Supplementary Figure 5

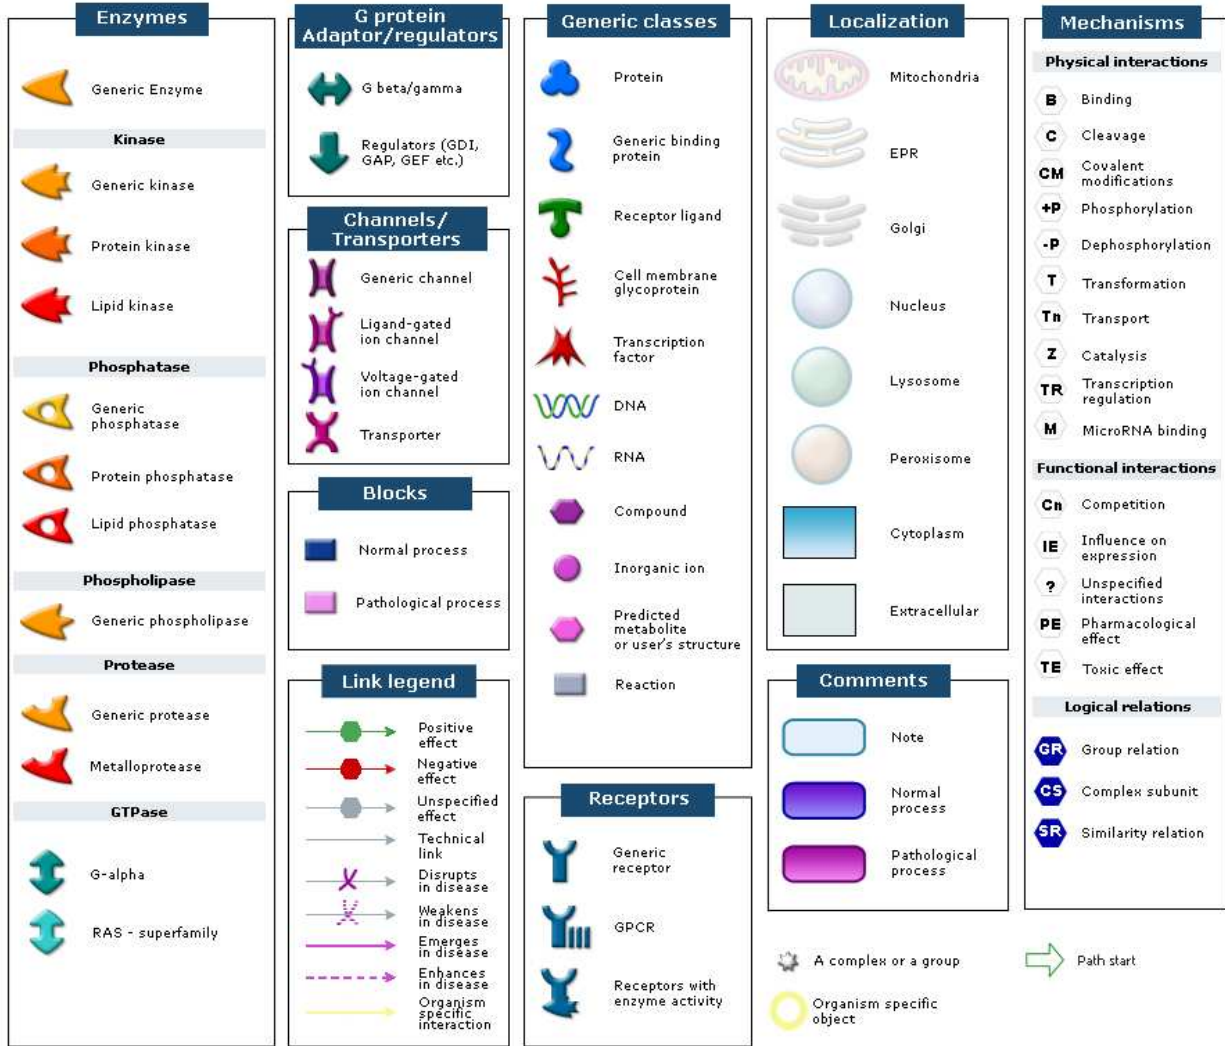

**Supplementary Table 1.** Clinical characteristics of 31 lung cancer samples in the exome sequencing study

| <b>Sample_ID</b> | <b>Subtype</b>          | <b>Stage</b> | <b>Age_at_DX</b> | <b>Race</b> | <b>Smoking_St</b> | <b>PackYears</b> | <b>Family_history</b> |
|------------------|-------------------------|--------------|------------------|-------------|-------------------|------------------|-----------------------|
| L383             | ADC_with_BAC            | IA           | 43               | Black       | Former            | 29               | Familial              |
| Lu-597           | ADC                     | IIIA         | 48               | Caucasian   | Never             | 0                | two grantparents      |
| Lu-2375          | ADC                     | IIA          | 36               | Caucasian   | Never             | 0                | one 1st-degree        |
| LU-1516          | BAC                     | IA           | 75               | Alskn/Ind   | Former            | 1.5ppd           | one 1st-degree        |
| LU-1800          | ADC                     | IV           | 46               | Caucasian   | Current           | 1.5ppd           | No                    |
| LU-1991          | ADC                     | IIB          | 74               | Alskn/Ind   | Former            | 1.0ppd           | No                    |
| LU-2349          | ADC                     | IA           | 64               | Alskn/Ind   | Former            | 1.0ppd           | one 1st-degree        |
| 7285             | SCC                     | IB           | 71               | Caucasian   | Former            | NoData           | No                    |
| 7313             | SCC                     | IB           | 71               | Caucasian   | Former            | NoData           | No                    |
| 7945             | AD                      | I            | 69               | Caucasian   | Never             | 0                | No                    |
| 7996             | SCC                     | I            | 63               | Caucasian   | Former            | NoData           | No                    |
| 12586            | AD                      | IB           | 65               | Caucasian   | Former            | NoData           | No                    |
| 12804            | SCC                     | IB           | 74               | Caucasian   | Current           | NoData           | No                    |
| 12820            | SCC                     | IA           | 75               | Caucasian   | Former            | NoData           | No                    |
| 12862            | AD                      | IA           | 60               | Black       | Former            | NoData           | No                    |
| 12924            | SCC                     | IA           | 58               | Caucasian   | Current           | NoData           | No                    |
| 13280            | SCC                     | IA           | 69               | Caucasian   | Current           | NoData           | No                    |
| 13299            | AD                      | IA           | 77               | Caucasian   | Former            | NoData           | No                    |
| 13394            | SCC                     | IB           | 70               | Caucasian   | Former            | NoData           | No                    |
| 13542            | SCC                     | IIB          | 64               | Caucasian   | Former            | NoData           | No                    |
| 13681            | AD                      | IIIA         | 69               | Caucasian   | Former            | NoData           | No                    |
| 15145            | SCC                     | IIIA         | 67               | Caucasian   | Current           | NoData           | No                    |
| 15637            | AD                      | IA           | 69               | Caucasian   | Current           | NoData           | No                    |
| 15822            | AD                      | IB           | 68               | Caucasian   | Never             | 0                | No                    |
| 15858            | AD                      | IA           | 58               | Caucasian   | Current           | NoData           | No                    |
| 16246            | AD                      | IA           | 77               | Caucasian   | Former            | NoData           | No                    |
| 16461            | AD                      | IB           | 78               | Black       | Former            | NoData           | No                    |
| 16617            | SCC                     | IA           | 73               | Caucasian   | Former            | NoData           | No                    |
| 16989            | AD                      | IB           | 62               | Caucasian   | Former            | NoData           | No                    |
| 17273            | Adenosquamous_carcinoma | IIB          | 69               | Caucasian   | Former            | NoData           | No                    |
| 18472            | SCC                     | IB           | 63               | Caucasian   | NoData            | 0                | No                    |

**Supplementary Table 2.** Sequence reads and coverages among 31 pairs of matched normal and tumor samples

| <b>Samples</b> | <b>total_reads</b> | <b>reads_in_exons(%)</b> | <b>total_exons</b> | <b>max_exon_coverage</b> | <b>median_exon_coverage</b> | <b>mean_exon_coverage</b> | <b>exon_coverage&gt;1(%)</b> | <b>exon_coverage&gt;5(%)</b> | <b>exon_coverage&gt;10(%)</b> | <b>exon_coverage&gt;20(%)</b> |
|----------------|--------------------|--------------------------|--------------------|--------------------------|-----------------------------|---------------------------|------------------------------|------------------------------|-------------------------------|-------------------------------|
| LU1516_N       | 219578336          | 40.7                     | 212911             | 4951.8                   | 87.1                        | 122.5                     | 91.7                         | 79.2                         | 76.3                          | 71.9                          |
| LU1516_T       | 235386523          | 41.8                     | 212911             | 5473.7                   | 95.7                        | 135.8                     | 91.4                         | 79.2                         | 76.6                          | 72.5                          |
| LU1800_N       | 206177925          | 43.2                     | 212911             | 4203.3                   | 87.4                        | 123.6                     | 90.1                         | 78.9                         | 76.2                          | 71.7                          |
| LU1800_T       | 228577638          | 42.7                     | 212911             | 4620.8                   | 94.6                        | 135.8                     | 90.9                         | 79.1                         | 76.4                          | 72.2                          |
| LU1991_N       | 123993193          | 40.7                     | 212911             | 2980.5                   | 49.8                        | 69.5                      | 86.6                         | 76.8                         | 72.8                          | 66.0                          |
| LU1991_T       | 226880280          | 42.7                     | 212911             | 6174.1                   | 91.5                        | 133.3                     | 90.3                         | 79.0                         | 76.4                          | 72.2                          |
| LU2349_N       | 195744241          | 41.2                     | 212911             | 5619.4                   | 79.4                        | 111.1                     | 90.5                         | 78.7                         | 75.8                          | 71.1                          |
| LU2349_T       | 228589175          | 41.8                     | 212911             | 6544.4                   | 92.4                        | 132.5                     | 91.0                         | 79.1                         | 76.3                          | 72.0                          |
| Lu-597_N       | 138700908          | 39.6                     | 212911             | 3045.1                   | 53.3                        | 75.7                      | 90.5                         | 76.8                         | 72.6                          | 66.4                          |
| Lu-597_T       | 126219986          | 41.0                     | 212911             | 2351.2                   | 52.0                        | 72.2                      | 89.2                         | 76.8                         | 72.8                          | 66.3                          |
| Lu-2375_N      | 134662387          | 40.0                     | 212911             | 2800.7                   | 54.9                        | 74.7                      | 90.4                         | 77.1                         | 73.2                          | 67.2                          |
| Lu-2375_T      | 139540822          | 35.5                     | 212911             | 2642.6                   | 49.5                        | 69.7                      | 91.3                         | 76.5                         | 72.0                          | 65.2                          |
| L383_N         | 52112934           | 30.3                     | 212911             | 101.8                    | 18.9                        | 20.2                      | 74.6                         | 69.8                         | 63.9                          | 48.1                          |
| L383_T         | 41212281           | 32.6                     | 212911             | 103.0                    | 16.3                        | 18.0                      | 73.9                         | 68.1                         | 60.9                          | 43.1                          |
| 12586_N        | 114806688          | 47.1                     | 212911             | 4960.2                   | 87.0                        | 121.8                     | 86.3                         | 77.1                         | 74.8                          | 70.9                          |
| 12586_T        | 110785377          | 46.0                     | 212911             | 4517.4                   | 80.7                        | 113.4                     | 87.2                         | 77.3                         | 74.8                          | 70.8                          |
| 12804_N        | 103175252          | 47.4                     | 212911             | 5802.9                   | 77.9                        | 109.6                     | 84.9                         | 77.1                         | 74.6                          | 70.2                          |
| 12804_T        | 150336386          | 43.3                     | 212911             | 6572.8                   | 99.3                        | 149.4                     | 89.8                         | 78.0                         | 75.6                          | 71.8                          |
| 12820_N        | 149787633          | 42.2                     | 212911             | 4651.5                   | 95.1                        | 143.6                     | 89.8                         | 77.8                         | 75.3                          | 71.5                          |
| 12820_T        | 136180927          | 43.5                     | 212911             | 5068.3                   | 88.4                        | 134.6                     | 88.1                         | 77.4                         | 75.0                          | 70.9                          |
| 12862_N        | 132664861          | 42.3                     | 212911             | 6943.0                   | 85.3                        | 126.4                     | 88.0                         | 77.2                         | 74.8                          | 70.5                          |
| 12862_T        | 136937788          | 43.4                     | 212911             | 7008.1                   | 92.8                        | 134.3                     | 88.7                         | 77.6                         | 75.2                          | 71.4                          |
| 12924_N        | 144679688          | 42.9                     | 212911             | 6965.1                   | 95.7                        | 139.8                     | 89.2                         | 77.9                         | 75.5                          | 71.7                          |
| 12924_T        | 156826247          | 41.1                     | 212911             | 6982.6                   | 94.0                        | 146.2                     | 90.9                         | 77.9                         | 75.3                          | 71.3                          |
| 13280_N        | 151262251          | 39.8                     | 212911             | 5641.4                   | 90.8                        | 136.7                     | 92.2                         | 77.9                         | 75.2                          | 71.2                          |
| 13280_T        | 149680150          | 43.9                     | 212911             | 5696.1                   | 100.9                       | 147.6                     | 89.7                         | 78.0                         | 75.7                          | 72.2                          |
| 13299_N        | 108715050          | 45.3                     | 212911             | 6674.4                   | 77.6                        | 109.6                     | 85.1                         | 76.9                         | 74.4                          | 70.0                          |
| 13299_T        | 157626772          | 42.3                     | 212911             | 8512.7                   | 103.1                       | 150.2                     | 90.4                         | 77.9                         | 75.5                          | 71.9                          |
| 13394_N        | 142438352          | 42.4                     | 212911             | 5850.0                   | 91.5                        | 134.5                     | 88.7                         | 77.8                         | 75.4                          | 71.5                          |
| 13394_T        | 132207176          | 43.5                     | 212911             | 5169.4                   | 88.2                        | 128.9                     | 88.7                         | 77.6                         | 75.2                          | 71.2                          |
| 13542_N        | 129165584          | 42.6                     | 212911             | 4679.4                   | 87.1                        | 123.8                     | 89.0                         | 77.6                         | 75.1                          | 71.1                          |
| 13542_T        | 144996715          | 41.5                     | 212911             | 5252.1                   | 93.1                        | 134.9                     | 90.6                         | 78.2                         | 75.5                          | 71.7                          |
| 13681_N        | 109539790          | 44.6                     | 212911             | 5277.3                   | 74.9                        | 108.5                     | 86.4                         | 77.0                         | 74.5                          | 70.1                          |
| 13681_T        | 105113518          | 47.5                     | 212911             | 5782.2                   | 79.8                        | 115.4                     | 84.7                         | 76.9                         | 74.6                          | 70.3                          |
| 15145_N        | 161932980          | 43.3                     | 212911             | 6274.9                   | 107.3                       | 163.5                     | 90.7                         | 77.9                         | 75.6                          | 72.1                          |
| 15145_T        | 147221180          | 43.4                     | 212911             | 6269.7                   | 97.0                        | 145.2                     | 89.3                         | 77.7                         | 75.4                          | 71.7                          |
| 15637_N        | 135424114          | 45.3                     | 212911             | 6271.9                   | 93.9                        | 142.1                     | 87.0                         | 77.1                         | 74.9                          | 71.1                          |

|         |           |      |        |        |       |       |      |      |      |      |
|---------|-----------|------|--------|--------|-------|-------|------|------|------|------|
| 15637_T | 90917876  | 47.8 | 212911 | 5454.1 | 69.9  | 99.1  | 82.4 | 76.5 | 73.9 | 69.3 |
| 15822_N | 159116450 | 41.2 | 212911 | 8682.4 | 95.2  | 149.7 | 90.9 | 77.7 | 75.2 | 71.3 |
| 15822_T | 156370384 | 41.6 | 212911 | 8078.9 | 95.1  | 149.1 | 91.0 | 77.7 | 75.2 | 71.3 |
| 15858_N | 144579585 | 40.0 | 212911 | 4960.0 | 85.2  | 130.2 | 91.2 | 77.5 | 74.8 | 70.5 |
| 15858_T | 161714822 | 40.6 | 212911 | 5997.3 | 96.7  | 148.2 | 92.0 | 78.0 | 75.3 | 71.4 |
| 16246_N | 154625871 | 43.2 | 212911 | 5435.1 | 95.9  | 153.9 | 89.6 | 77.5 | 75.1 | 71.1 |
| 16246_T | 176199792 | 41.4 | 212911 | 6207.6 | 104.1 | 167.1 | 91.8 | 78.0 | 75.4 | 71.8 |
| 16461_N | 156249834 | 41.0 | 212911 | 7084.2 | 92.9  | 146.7 | 91.5 | 78.0 | 75.3 | 71.3 |
| 16461_T | 165728570 | 40.6 | 212911 | 6727.7 | 90.8  | 153.8 | 91.0 | 77.8 | 75.0 | 70.7 |
| 16617_N | 156591771 | 38.8 | 212911 | 5108.4 | 86.7  | 137.3 | 92.2 | 77.8 | 75.0 | 70.7 |
| 16617_T | 172281875 | 41.5 | 212911 | 6043.7 | 102.5 | 163.4 | 92.4 | 78.3 | 75.4 | 71.7 |
| 16989_N | 147519898 | 41.3 | 212911 | 5717.3 | 88.5  | 136.4 | 91.4 | 77.7 | 75.0 | 70.9 |
| 16989_T | 159438606 | 40.8 | 212911 | 6180.8 | 94.4  | 145.6 | 92.1 | 78.1 | 75.4 | 71.4 |
| 17273_N | 141754851 | 40.5 | 212911 | 5802.9 | 85.7  | 128.4 | 91.8 | 77.9 | 75.0 | 70.8 |
| 17273_T | 154701286 | 39.6 | 212911 | 6620.0 | 89.1  | 138.8 | 92.2 | 77.9 | 75.0 | 70.9 |
| 18472_N | 161023552 | 41.9 | 212911 | 6643.1 | 98.9  | 151.0 | 91.3 | 77.8 | 75.2 | 71.5 |
| 18472_T | 149271789 | 42.6 | 212911 | 5490.3 | 94.4  | 140.8 | 91.6 | 78.0 | 75.3 | 71.4 |
| 7285_N  | 142372069 | 44.2 | 212911 | 4895.1 | 98.1  | 143.9 | 89.1 | 77.8 | 75.5 | 71.7 |
| 7285_T  | 140710707 | 45.2 | 212911 | 6554.7 | 94.1  | 147.2 | 89.0 | 77.9 | 75.4 | 71.5 |
| 7313_N  | 147102824 | 43.4 | 212911 | 6047.5 | 97.6  | 146.1 | 89.9 | 77.9 | 75.4 | 71.6 |
| 7313_T  | 112229845 | 37.7 | 212911 | 1915.8 | 80.1  | 98.1  | 89.5 | 77.7 | 74.9 | 70.5 |
| 7945_N  | 143204033 | 42.2 | 212911 | 6908.9 | 91.5  | 136.7 | 89.8 | 77.5 | 75.0 | 70.9 |
| 7945_T  | 140710707 | 45.2 | 212911 | 6554.7 | 94.1  | 147.2 | 89.0 | 77.9 | 75.4 | 71.5 |
| 7996_N  | 163792908 | 41.0 | 212911 | 5533.2 | 101.4 | 151.9 | 91.6 | 78.2 | 75.7 | 71.9 |
| 7996_T  | 75776196  | 39.5 | 212911 | 1499.3 | 55.4  | 68.3  | 86.7 | 76.7 | 73.4 | 67.8 |
| Mean    | 146497858 | 42.0 | 212911 | 5396.4 | 85.2  | 126.3 | 89.2 | 77.5 | 74.6 | 70.0 |

**Supplementary Table 3.** Summary of Somatic SNVs in 31 lung cancer samples

| sample                     | 12586 | 12804 | 12820 | 12862 | 12924 | 13280 | 13299 | 13394 | 13542 | 13681 |
|----------------------------|-------|-------|-------|-------|-------|-------|-------|-------|-------|-------|
| <b>SNV</b>                 | 388   | 48    | 316   | 11    | 710   | 496   | 17    | 171   | 375   | 242   |
| <b>exonic</b>              | 197   | 16    | 148   | 0     | 367   | 243   | 2     | 60    | 168   | 110   |
| <b>splicing</b>            | 6     | 0     | 15    | 0     | 13    | 7     | 0     | 6     | 4     | 3     |
| <b>ncRNA</b>               | 59    | 12    | 49    | 0     | 48    | 40    | 2     | 17    | 71    | 42    |
| <b>UTR5</b>                | 4     | 0     | 2     | 0     | 12    | 7     | 0     | 4     | 1     | 3     |
| <b>UTR3</b>                | 5     | 1     | 11    | 0     | 10    | 7     | 0     | 5     | 3     | 8     |
| <b>intronic</b>            | 83    | 12    | 60    | 4     | 170   | 141   | 6     | 57    | 83    | 53    |
| <b>upstream</b>            | 3     | 1     | 2     | 0     | 8     | 5     | 0     | 0     | 5     | 2     |
| <b>downstream</b>          | 4     | 0     | 2     | 0     | 6     | 3     | 1     | 2     | 2     | 2     |
| <b>intergenic</b>          | 27    | 6     | 27    | 7     | 76    | 43    | 6     | 20    | 38    | 19    |
| <b>frameshift del</b>      | 4     | 0     | 2     | 0     | 5     | 5     | 0     | 1     | 5     | 1     |
| <b>frameshift ins</b>      | 1     | 0     | 1     | 0     | 0     | 0     | 0     | 0     | 1     | 3     |
| <b>nonframeshift del</b>   | 0     | 0     | 0     | 0     | 0     | 0     | 0     | 0     | 0     | 0     |
| <b>nonframeshift ins</b>   | 0     | 0     | 0     | 0     | 0     | 0     | 0     | 0     | 0     | 0     |
| <b>nonsense(truncated)</b> | 9     | 3     | 9     | 0     | 31    | 11    | 0     | 3     | 8     | 7     |
| <b>nonsense(extension)</b> | 0     | 0     | 0     | 0     | 0     | 0     | 0     | 1     | 0     | 0     |
| <b>nonsynonymous</b>       | 134   | 7     | 106   | 0     | 260   | 173   | 2     | 45    | 110   | 72    |
| <b>synonymous</b>          | 50    | 6     | 37    | 0     | 75    | 56    | 0     | 12    | 47    | 27    |
| <b>tier1</b>               | 153   | 10    | 129   | 0     | 306   | 193   | 2     | 55    | 123   | 84    |
| <b>tier2</b>               | 136   | 18    | 109   | 2     | 191   | 145   | 3     | 43    | 143   | 88    |
| <b>tier3</b>               | 93    | 15    | 76    | 5     | 196   | 132   | 6     | 67    | 90    | 61    |
| <b>tier4</b>               | 12    | 5     | 17    | 4     | 30    | 33    | 6     | 12    | 23    | 12    |

|                            |       |       |       |       |       |       |       |       |       |       |
|----------------------------|-------|-------|-------|-------|-------|-------|-------|-------|-------|-------|
| <b>sample</b>              | 15145 | 15637 | 15822 | 15858 | 16246 | 16461 | 16617 | 16989 | 17273 | 18472 |
| <b>SNV</b>                 | 143   | 10    | 35    | 114   | 524   | 900   | 227   | 79    | 26    | 146   |
| <b>exonic</b>              | 70    | 0     | 7     | 47    | 243   | 424   | 95    | 38    | 1     | 60    |
| <b>splicing</b>            | 2     | 0     | 0     | 5     | 12    | 18    | 6     | 2     | 0     | 3     |
| <b>ncRNA</b>               | 18    | 3     | 9     | 22    | 87    | 141   | 37    | 13    | 9     | 20    |
| <b>UTR5</b>                | 0     | 0     | 0     | 1     | 1     | 9     | 4     | 0     | 0     | 1     |
| <b>UTR3</b>                | 2     | 0     | 1     | 2     | 10    | 14    | 10    | 0     | 0     | 0     |
| <b>intronic</b>            | 26    | 4     | 6     | 20    | 108   | 206   | 46    | 8     | 6     | 39    |
| <b>upstream</b>            | 1     | 0     | 0     | 1     | 6     | 10    | 2     | 0     | 1     | 0     |
| <b>downstream</b>          | 0     | 0     | 0     | 4     | 5     | 3     | 1     | 0     | 0     | 1     |
| <b>intergenic</b>          | 24    | 3     | 12    | 12    | 52    | 75    | 26    | 18    | 9     | 22    |
| <b>frameshift del</b>      | 0     | 0     | 1     | 0     | 0     | 4     | 4     | 2     | 0     | 3     |
| <b>frameshift ins</b>      | 0     | 0     | 0     | 0     | 2     | 3     | 0     | 0     | 0     | 0     |
| <b>nonframeshift del</b>   | 1     | 0     | 0     | 0     | 0     | 0     | 0     | 0     | 0     | 0     |
| <b>nonframeshift ins</b>   | 0     | 0     | 0     | 0     | 0     | 0     | 0     | 0     | 0     | 0     |
| <b>nonsense(trancated)</b> | 1     | 0     | 0     | 3     | 17    | 25    | 7     | 1     | 0     | 1     |
| <b>nonsense(extension)</b> | 0     | 0     | 0     | 0     | 0     | 0     | 0     | 0     | 0     | 0     |
| <b>nonsynonymous</b>       | 55    | 0     | 4     | 37    | 186   | 313   | 60    | 30    | 1     | 42    |
| <b>synonymous</b>          | 14    | 0     | 2     | 9     | 43    | 87    | 26    | 5     | 0     | 16    |
| <b>tier1</b>               | 58    | 0     | 5     | 43    | 214   | 360   | 76    | 34    | 1     | 49    |
| <b>tier2</b>               | 41    | 3     | 14    | 39    | 163   | 303   | 84    | 25    | 10    | 39    |
| <b>tier3</b>               | 33    | 6     | 9     | 25    | 128   | 230   | 63    | 15    | 9     | 46    |
| <b>tier4</b>               | 13    | 1     | 7     | 12    | 31    | 25    | 10    | 7     | 6     | 15    |



|                            |      |      |      |      |      |         |         |         |         |         |        |
|----------------------------|------|------|------|------|------|---------|---------|---------|---------|---------|--------|
| <b>sample</b>              | 7285 | 7313 | 7945 | 7996 | L383 | LU-1516 | LU-1800 | LU-1991 | LU-2349 | Lu-2375 | Lu-597 |
| <b>SNV</b>                 | 578  | 614  | 43   | 182  | 15   | 36      | 14      | 571     | 120     | 27      | 23     |
| <b>exonic</b>              | 275  | 266  | 10   | 74   | 1    | 8       | 1       | 243     | 47      | 2       | 4      |
| <b>splicing</b>            | 12   | 18   | 0    | 3    | 0    | 1       | 0       | 13      | 2       | 0       | 0      |
| <b>ncRNA</b>               | 87   | 98   | 8    | 42   | 0    | 3       | 1       | 82      | 9       | 7       | 1      |
| <b>UTR5</b>                | 4    | 8    | 0    | 2    | 0    | 2       | 0       | 4       | 5       | 0       | 0      |
| <b>UTR3</b>                | 6    | 17   | 1    | 1    | 0    | 3       | 0       | 11      | 2       | 1       | 2      |
| <b>intronic</b>            | 142  | 138  | 11   | 36   | 9    | 11      | 5       | 153     | 31      | 7       | 2      |
| <b>upstream</b>            | 3    | 7    | 1    | 6    | 0    | 0       | 0       | 3       | 1       | 0       | 0      |
| <b>downstream</b>          | 5    | 4    | 1    | 2    | 1    | 0       | 0       | 7       | 2       | 1       | 0      |
| <b>intergenic</b>          | 44   | 58   | 11   | 16   | 4    | 8       | 7       | 55      | 21      | 9       | 14     |
| <b>frameshift del</b>      | 7    | 3    | 1    | 0    | 0    | 0       | 0       | 2       | 1       | 0       | 1      |
| <b>frameshift ins</b>      | 0    | 2    | 0    | 0    | 0    | 0       | 0       | 1       | 0       | 1       | 0      |
| <b>nonframeshift del</b>   | 1    | 0    | 0    | 0    | 0    | 0       | 0       | 0       | 0       | 0       | 0      |
| <b>nonframeshift ins</b>   | 0    | 0    | 0    | 0    | 0    | 0       | 0       | 0       | 0       | 0       | 0      |
| <b>nonsense(trancated)</b> | 16   | 18   | 0    | 3    | 0    | 1       | 0       | 17      | 3       | 0       | 0      |
| <b>nonsense(extension)</b> | 0    | 0    | 0    | 0    | 0    | 0       | 0       | 0       | 0       | 0       | 0      |
| <b>nonsynonymous</b>       | 188  | 178  | 4    | 54   | 1    | 6       | 1       | 166     | 32      | 1       | 3      |
| <b>synonymous</b>          | 68   | 73   | 5    | 19   | 0    | 2       | 0       | 63      | 12      | 0       | 0      |
| <b>tier1</b>               | 217  | 214  | 5    | 59   | 1    | 8       | 1       | 197     | 37      | 1       | 4      |
| <b>tier2</b>               | 200  | 222  | 15   | 76   | 2    | 8       | 1       | 192     | 33      | 12      | 3      |
| <b>tier3</b>               | 151  | 173  | 11   | 40   | 11   | 15      | 6       | 172     | 38      | 11      | 8      |
| <b>tier4</b>               | 22   | 23   | 12   | 10   | 1    | 6       | 6       | 23      | 14      | 3       | 8      |

**Supplementary Table 4.** All somatic SNVs in 31 lung cancer genomes.

| sample | chr | start     | end       | ref           | var | geno_N | geno_T         | region     | gene      | function | seq_change                |
|--------|-----|-----------|-----------|---------------|-----|--------|----------------|------------|-----------|----------|---------------------------|
| 12586  | 1   | 1441214   | 1441214   | G             | A   | G      | R              | intronic   | ATAD3A    | NA       | NA                        |
| 12586  | 1   | 11213991  | 11213991  | G             | A   | G      | R              | exonic     | MTOR      | silent   | NM_004958:p.L868L         |
| 12586  | 1   | 19442988  | 19442988  | G             | C   | G      | S              | intronic   | KIAA0090  | NA       | NA                        |
| 12586  | 1   | 27812057  | 27812057  | G             | A   | G      | R              | exonic     | FGR       | silent   | NM_001042729:p.Y515Y      |
| 12586  | 1   | 52684816  | 52684816  | G             | A   | G      | R              | intronic   | ZCCHC11   | NA       | NA                        |
| 12586  | 1   | 57093209  | 57093209  | C             | A   | C      | M              | exonic     | C8A       | missense | NM_000562:p.P16H          |
| 12586  | 1   | 66485892  | 66485892  | C             | A   | C      | M              | exonic     | PDE4B     | missense | NM_001037340:p.A133E      |
| 12586  | 1   | 68677832  | 68677832  | C             | T   | C      | Y              | splicing   | RPE65     | missense | NM_000329:p.S242N         |
| 12586  | 1   | 70030306  | 70030306  | T             | C   | T      | Y              | intronic   | LRRC7     | NA       | NA                        |
| 12586  | 1   | 70266524  | 70266524  | -             | T   | G      | */+T           | exonic     | LRRC7     | FS_ins   | NM_020794:p.G588fs        |
| 12586  | 1   | 70266526  | 70266526  | A             | T   | A      | W              | exonic     | LRRC7     | nonsense | NM_020794:p.K589X         |
| 12586  | 1   | 70291385  | 70291385  | G             | A   | G      | R              | exonic     | LRRC7     | missense | NM_020794:p.R1362Q        |
| 12586  | 1   | 70291386  | 70291386  | G             | T   | G      | K              | exonic     | LRRC7     | silent   | NM_020794:p.R1362R        |
| 12586  | 1   | 80521790  | 80521790  | G             | A   | G      | R              | intergenic | NA        | NA       | NA                        |
| 12586  | 1   | 86024657  | 86024657  | A             | T   | A      | W              | exonic     | COL24A1   | missense | NM_152890:p.L1343M        |
| 12586  | 1   | 90172413  | 90172413  | G             | T   | G      | K              | exonic     | LRRC8D    | missense | NM_018103:p.V400F         |
| 12586  | 1   | 99534948  | 99534948  | C             | A   | C      | M              | exonic     | LPPR4     | missense | NM_014839:p.P159T         |
| 12586  | 1   | 114255536 | 114255536 | G             | T   | G      | K              | exonic     | DCLRE1B   | missense | NM_022836:p.D267Y         |
| 12586  | 1   | 114323781 | 114323781 | G             | T   | G      | K              | intronic   | OLFML3    | NA       | NA                        |
| 12586  | 1   | 143540153 | 143540153 | T             | G   | T      | K              | UTR3       | NBPF9     | NA       | NA                        |
| 12586  | 1   | 147305549 | 147305549 | A             | T   | A      | W              | intergenic | NA        | NA       | NA                        |
| 12586  | 1   | 150938386 | 150938386 | G             | T   | G      | K              | UTR3       | LCE2A     | NA       | NA                        |
| 12586  | 1   | 156006812 | 156006812 | C             | G   | C      | S              | intronic   | FCRL2     | NA       | NA                        |
| 12586  | 1   | 156783775 | 156783775 | G             | T   | G      | K              | exonic     | OR6Y1     | missense | NM_001005189:p.H249N      |
| 12586  | 1   | 157013366 | 157013366 | T             | C   | T      | Y              | exonic     | OR6N2     | missense | NM_001005278:p.I228M      |
| 12586  | 1   | 167852877 | 167852877 | G             | T   | G      | K              | intronic   | SELP      | NA       | NA                        |
| 12586  | 1   | 173047535 | 173047535 | A             | T   | A      | W              | intronic   | RABGAP1L  | NA       | NA                        |
| 12586  | 1   | 174792283 | 174792283 | T             | A   | T      | W              | exonic     | PAPPA2    | missense | NM_021936:p.F68I          |
| 12586  | 1   | 199288428 | 199288428 | G             | T   | G      | K              | intronic   | CACNA15   | NA       | NA                        |
| 12586  | 1   | 200994059 | 200994059 | C             | A   | C      | M              | intronic   | KDM5B     | NA       | NA                        |
| 12586  | 1   | 203206420 | 203206426 | GATGGG -<br>A | -   | G      | */-<br>GATGGGA | exonic     | NFASC     | FS_del   | NM_001005388:p.353_355del |
| 12586  | 1   | 203547591 | 203547591 | C             | A   | C      | M              | intronic   | NUAK2     | NA       | NA                        |
| 12586  | 1   | 214605097 | 214605097 | T             | C   | T      | Y              | intronic   | USH2A     | NA       | NA                        |
| 12586  | 1   | 245902232 | 245902232 | C             | A   | C      | M              | exonic     | OR13G1    | silent   | NM_001005487:p.V245V      |
| 12586  | 1   | 246071401 | 246071401 | A             | T   | A      | W              | exonic     | OR11L1    | missense | NM_001001959:p.C141S      |
| 12586  | 1   | 246195900 | 246195900 | T             | A   | T      | W              | exonic     | OR2AK2    | missense | NM_001004491:p.L215H      |
| 12586  | 1   | 246329252 | 246329252 | T             | A   | T      | W              | intronic   | OR2L13    | NA       | NA                        |
| 12586  | 1   | 246330250 | 246330250 | C             | A   | C      | M              | UTR3       | OR2L13    | NA       | NA                        |
| 12586  | 1   | 246635837 | 246635837 | T             | A   | T      | W              | upstream   | OR2T1     | NA       | NA                        |
| 12586  | 1   | 246636879 | 246636879 | G             | T   | G      | K              | exonic     | OR2T1     | missense | NM_030904:p.D321Y         |
| 12586  | 1   | 246752378 | 246752378 | C             | A   | C      | M              | exonic     | OR2G6     | missense | NM_001013355:p.Q270K      |
| 12586  | 2   | 36040     | 36040     | C             | A   | C      | M              | exonic     | FAM110C   | missense | NM_001077710:p.D116Y      |
| 12586  | 2   | 15437153  | 15437153  | G             | A   | G      | R              | intronic   | NBAS      | NA       | NA                        |
| 12586  | 2   | 29308733  | 29308733  | C             | A   | G      | R              | exonic     | ALK       | missense | NM_004304:p.P858L         |
| 12586  | 2   | 37141282  | 37141282  | C             | A   | C      | M              | exonic     | HEATR5B   | missense | NM_019024:p.G599C         |
| 12586  | 2   | 38850795  | 38850795  | G             | A   | G      | R              | intergenic | NA        | NA       | NA                        |
| 12586  | 2   | 73450765  | 73450765  | C             | T   | C      | Y              | intergenic | NA        | NA       | NA                        |
| 12586  | 2   | 79217695  | 79217695  | C             | A   | C      | M              | ncRNA      | REG1P     | NA       | NA                        |
| 12586  | 2   | 86560909  | 86560909  | A             | T   | A      | W              | exonic     | KDM3A     | missense | NM_018433:p.S809C         |
| 12586  | 2   | 90963759  | 90963759  | A             | T   | A      | W              | intergenic | NA        | NA       | NA                        |
| 12586  | 2   | 106451149 | 106451149 | G             | T   | G      | K              | exonic     | RGPD3     | silent   | NM_001144013:p.R10R       |
| 12586  | 2   | 122202349 | 122202349 | C             | A   | C      | M              | exonic     | MKI67IP   | missense | NM_032390:p.K226N         |
| 12586  | 2   | 131236210 | 131236210 | A             | C   | A      | M              | exonic     | FAM123C   | missense | NM_001105195:p.E32A       |
| 12586  | 2   | 131917457 | 131917457 | C             | A   | C      | M              | ncRNA      | LOC401010 | NA       | NA                        |
| 12586  | 2   | 131917458 | 131917458 | C             | A   | C      | M              | ncRNA      | LOC401010 | NA       | NA                        |
| 12586  | 2   | 132791935 | 132791935 | C             | A   | C      | M              | intergenic | NA        | NA       | NA                        |
| 12586  | 2   | 141190709 | 141190709 | C             | A   | C      | M              | intronic   | LRP1B     | NA       | NA                        |
| 12586  | 2   | 151922470 | 151922470 | C             | T   | C      | Y              | exonic     | TNFAIP6   | missense | NM_007115:p.T15I          |
| 12586  | 2   | 159913748 | 159913748 | A             | G   | A      | R              | intronic   | BAZ2B     | NA       | NA                        |
| 12586  | 2   | 165661205 | 165661205 | T             | C   | T      | Y              | intronic   | SCN3A     | NA       | NA                        |
| 12586  | 2   | 167810391 | 167810391 | G             | A   | G      | R              | exonic     | XIRP2     | missense | NM_152381:p.G1415S        |
| 12586  | 2   | 170079381 | 170079381 | A             | G   | A      | R              | exonic     | KBTBD10   | missense | NM_006063:p.R388G         |
| 12586  | 2   | 210302827 | 210302827 | C             | T   | C      | Y              | exonic     | MAP2      | missense | NM_002374:p.R1722C        |
| 12586  | 2   | 215591025 | 215591025 | C             | A   | C      | M              | exonic     | ABCA12    | missense | NM_173076:p.R578S         |
| 12586  | 2   | 233547856 | 233547856 | C             | A   | C      | M              | UTR5       | NGEF      | NA       | NA                        |
| 12586  | 3   | 41952493  | 41952493  | C             | G   | C      | S              | intronic   | ULK4      | NA       | NA                        |
| 12586  | 3   | 41952494  | 41952494  | T             | A   | T      | W              | intronic   | ULK4      | NA       | NA                        |
| 12586  | 3   | 42274757  | 42274757  | G             | T   | G      | K              | intronic   | CCK       | NA       | NA                        |
| 12586  | 3   | 45917521  | 45917521  | G             | A   | G      | R              | exonic     | CCR9      | silent   | NM_031200:p.V79V          |
| 12586  | 3   | 46282127  | 46282127  | G             | A   | G      | R              | exonic     | CCR3      | nonsense | NM_001164680:p.W176X      |
| 12586  | 3   | 58487505  | 58487505  | T             | C   | T      | Y              | intronic   | ACOX2     | NA       | NA                        |
| 12586  | 3   | 68865067  | 68865067  | C             | A   | C      | M              | intronic   | FAM19A4   | NA       | NA                        |
| 12586  | 3   | 75869914  | 75869914  | C             | T   | C      | Y              | exonic     | ZNF717    | missense | NM_001128223:p.R517H      |
| 12586  | 3   | 102928898 | 102928898 | A             | C   | A      | M              | intronic   | CEP97     | NA       | NA                        |
| 12586  | 3   | 115553043 | 115553043 | C             | A   | C      | M              | exonic     | ZBTB20    | missense | NM_001164346:p.R118L      |

|       |   |           |           |   |   |   |      |            |           |             |                      |
|-------|---|-----------|-----------|---|---|---|------|------------|-----------|-------------|----------------------|
| 12586 | 3 | 129999469 | 129999469 | A | G | A | R    | intronic   | RAB7A     | NA          | NA                   |
| 12586 | 3 | 130470141 | 130470141 | G | T | G | K    | exonic     | COPG      | nonsense    | NM_016128:p.E588X    |
| 12586 | 3 | 135042829 | 135042829 | G | C | G | S    | exonic     | RAB6B     | nonsense    | NM_016577:p.Y93X     |
| 12586 | 3 | 141884546 | 141884546 | C | A | C | M    | exonic     | TRIM42    | silent      | NM_152616:p.I298I    |
| 12586 | 3 | 152127330 | 152127330 | C | A | C | M    | exonic     | CLRN1     | stoploss SN | NM_052995:p.X121L    |
| 12586 | 3 | 197573538 | 197573538 | A | T | A | W    | intronic   | UBXN7     | NA          | NA                   |
| 12586 | 4 | 22024454  | 22024454  | C | T | C | Y    | exonic     | GPR125    | missense    | NM_145290:p.D631N    |
| 12586 | 4 | 47545094  | 47545094  | A | G | A | R    | exonic     | NFXL1     | missense    | NM_152995:p.F860S    |
| 12586 | 4 | 48794490  | 48794490  | T | A | T | W    | intergenic | NA        | NA          | NA                   |
| 12586 | 4 | 70299996  | 70299996  | C | T | C | Y    | intergenic | NA        | NA          | NA                   |
| 12586 | 4 | 71290299  | 71290299  | G | T | G | K    | UTR3       | SMR3B     | NA          | NA                   |
| 12586 | 4 | 72423821  | 72423821  | G | T | G | K    | UTR5       | SLC4A4    | NA          | NA                   |
| 12586 | 4 | 84078566  | 84078566  | T | C | T | Y    | intronic   | LIN54     | NA          | NA                   |
| 12586 | 4 | 104279130 | 104279130 | C | T | C | Y    | intronic   | CENPE     | NA          | NA                   |
| 12586 | 4 | 110078433 | 110078433 | G | T | G | K    | exonic     | COL25A1   | missense    | NM_032518:p.P230T    |
| 12586 | 4 | 112086285 | 112086285 | G | T | G | K    | intergenic | NA        | NA          | NA                   |
| 12586 | 4 | 119194765 | 119194765 | A | T | A | W    | exonic     | NDST3     | silent      | NM_004784:p.V84V     |
| 12586 | 4 | 126589539 | 126589539 | G | A | G | R    | exonic     | FAT4      | missense    | NM_024582:p.E2640K   |
| 12586 | 4 | 162728253 | 162728253 | T | A | T | W    | intronic   | FSTL5     | NA          | NA                   |
| 12586 | 4 | 162728254 | 162728254 | C | A | C | M    | intronic   | FSTL5     | NA          | NA                   |
| 12586 | 4 | 189305106 | 189305106 | G | C | G | S    | exonic     | TRIML1    | silent      | NM_178556:p.L331L    |
| 12586 | 5 | 11465146  | 11465146  | C | A | C | M    | splicing   | CTNND2    | NA          | NA                   |
| 12586 | 5 | 13882800  | 13882800  | G | C | G | S    | exonic     | DNAH5     | missense    | NM_001369:p.A2088G   |
| 12586 | 5 | 23558418  | 23558418  | A | G | A | R    | intronic   | PRDM9     | NA          | NA                   |
| 12586 | 5 | 23558420  | 23558420  | G | C | G | S    | intronic   | PRDM9     | NA          | NA                   |
| 12586 | 5 | 24571068  | 24571068  | T | A | T | W    | exonic     | CDH10     | missense    | NM_006727:p.M242L    |
| 12586 | 5 | 37161125  | 37161125  | G | A | G | R    | exonic     | C5orf42   | missense    | NM_023073:p.P2925L   |
| 12586 | 5 | 43623401  | 43623401  | C | A | C | M    | intergenic | NA        | NA          | NA                   |
| 12586 | 5 | 50607174  | 50607174  | G | T | G | K    | intergenic | NA        | NA          | NA                   |
| 12586 | 5 | 76206962  | 76206962  | G | T | G | K    | exonic     | S100Z     | missense    | NM_130772:p.A8S      |
| 12586 | 5 | 84331529  | 84331529  | T | C | T | Y    | intergenic | NA        | NA          | NA                   |
| 12586 | 5 | 84331531  | 84331531  | G | T | G | K    | intergenic | NA        | NA          | NA                   |
| 12586 | 5 | 84796042  | 84796042  | T | A | T | W    | intergenic | NA        | NA          | NA                   |
| 12586 | 5 | 132237551 | 132237551 | C | A | C | M    | exonic     | LEAP2     | missense    | NM_052971:p.S23Y     |
| 12586 | 5 | 137616963 | 137616963 | G | A | G | R    | splicing   | GFRA3     | missense    | NM_001496:p.T342M    |
| 12586 | 5 | 138685464 | 138685464 | G | T | G | K    | ncRNA      | MATR3     | NA          | NA                   |
| 12586 | 5 | 140690593 | 140690593 | G | T | G | K    | exonic     | PCDHGA1   | missense    | NM_031993:p.G53V     |
| 12586 | 5 | 140692131 | 140692131 | G | - | C | */-G | exonic     | PCDHGA1   | FS_del      | NM_031993:p.A566fs   |
| 12586 | 5 | 141317097 | 141317097 | G | T | G | K    | exonic     | PCDH12    | silent      | NM_016580:p.T168T    |
| 12586 | 5 | 149496807 | 149496807 | G | A | G | R    | UTR5       | PDGFRB    | NA          | NA                   |
| 12586 | 5 | 149736141 | 149736141 | G | T | G | K    | intronic   | TCOF1     | NA          | NA                   |
| 12586 | 6 | 24671670  | 24671670  | C | A | C | M    | exonic     | KIAA0319  | silent      | NM_014809:p.L829L    |
| 12586 | 6 | 29177065  | 29177065  | C | G | C | S    | intergenic | NA        | NA          | NA                   |
| 12586 | 6 | 29339482  | 29339482  | A | T | A | W    | intergenic | NA        | NA          | NA                   |
| 12586 | 6 | 43146243  | 43146243  | C | T | C | Y    | intronic   | KLC4      | NA          | NA                   |
| 12586 | 6 | 54174938  | 54174938  | C | A | C | M    | exonic     | C6orf142  | missense    | NM_138569:p.P354H    |
| 12586 | 6 | 58554759  | 58554759  | C | A | C | M    | intergenic | NA        | NA          | NA                   |
| 12586 | 6 | 68700791  | 68700791  | C | T | C | Y    | intergenic | NA        | NA          | NA                   |
| 12586 | 6 | 69405498  | 69405498  | C | A | C | M    | exonic     | BAI3      | nonsense    | NM_001704:p.Y70X     |
| 12586 | 6 | 70105948  | 70105948  | C | G | C | S    | exonic     | BAI3      | missense    | NM_001704:p.A1097G   |
| 12586 | 6 | 76769378  | 76769378  | T | A | T | W    | exonic     | IMPG1     | missense    | NM_001563:p.D423V    |
| 12586 | 6 | 80720236  | 80720236  | C | - | T | */-C | intergenic | NA        | NA          | NA                   |
| 12586 | 6 | 80720465  | 80720465  | G | A | G | R    | intergenic | NA        | NA          | NA                   |
| 12586 | 6 | 97160532  | 97160532  | G | T | G | K    | exonic     | FHL5      | missense    | NM_001170807:p.W123L |
| 12586 | 6 | 101161289 | 101161289 | C | A | C | M    | intronic   | ASCC3     | NA          | NA                   |
| 12586 | 6 | 101161593 | 101161593 | C | T | C | Y    | exonic     | ASCC3     | silent      | NM_006828:p.R1626R   |
| 12586 | 6 | 102372975 | 102372975 | C | A | C | M    | exonic     | GRIK2     | missense    | NM_021956:p.T414K    |
| 12586 | 6 | 102444337 | 102444337 | G | A | G | R    | exonic     | GRIK2     | missense    | NM_021956:p.V552I    |
| 12586 | 6 | 117757260 | 117757260 | C | A | C | M    | exonic     | ROS1      | missense    | NM_002944:p.G1764V   |
| 12586 | 6 | 117757261 | 117757261 | C | A | C | M    | exonic     | ROS1      | missense    | NM_002944:p.G1764W   |
| 12586 | 6 | 121601995 | 121601995 | G | A | G | R    | exonic     | C6orf170  | silent      | NM_152730:p.L762L    |
| 12586 | 6 | 124718071 | 124718071 | C | A | C | M    | intronic   | NKAIN2    | NA          | NA                   |
| 12586 | 6 | 149959915 | 149959915 | A | T | A | W    | exonic     | KATNA1    | NA          | NA                   |
| 12586 | 6 | 160942049 | 160942049 | C | G | C | S    | exonic     | LPA       | missense    | NM_005577:p.S1006T   |
| 12586 | 7 | 15707689  | 15707689  | A | G | A | R    | intergenic | NA        | NA          | NA                   |
| 12586 | 7 | 19706493  | 19706493  | C | G | C | S    | intronic   | TWISTNB   | NA          | NA                   |
| 12586 | 7 | 36160955  | 36160955  | G | A | G | R    | exonic     | EEPDI     | missense    | NM_030636:p.R166H    |
| 12586 | 7 | 50654330  | 50654330  | C | A | C | M    | intronic   | GRB10     | NA          | NA                   |
| 12586 | 7 | 55674026  | 55674026  | G | T | G | K    | intergenic | NA        | NA          | NA                   |
| 12586 | 7 | 63113191  | 63113191  | A | T | A | W    | intergenic | NA        | NA          | NA                   |
| 12586 | 7 | 73937346  | 73937346  | G | A | G | R    | UTR3       | STAG3L2   | NA          | NA                   |
| 12586 | 7 | 81212178  | 81212178  | C | A | C | M    | intronic   | HGF       | NA          | NA                   |
| 12586 | 7 | 81212179  | 81212179  | C | A | C | M    | intronic   | HGF       | NA          | NA                   |
| 12586 | 7 | 86380261  | 86380261  | G | A | G | R    | exonic     | KIAA1324L | silent      | NM_001142749:p.L643L |
| 12586 | 7 | 91490262  | 91490262  | A | G | A | R    | intronic   | AKAP9     | NA          | NA                   |
| 12586 | 7 | 94834591  | 94834591  | C | A | C | M    | intronic   | PON3      | NA          | NA                   |
| 12586 | 7 | 95495379  | 95495379  | C | A | C | M    | intronic   | DYNC111   | NA          | NA                   |
| 12586 | 7 | 97829706  | 97829706  | T | C | T | Y    | intronic   | BAIAP2L1  | NA          | NA                   |
| 12586 | 7 | 100082072 | 100082072 | C | A | C | M    | intronic   | ACTL6B    | NA          | NA                   |

|       |    |           |           |   |   |   |      |            |          |          |                      |
|-------|----|-----------|-----------|---|---|---|------|------------|----------|----------|----------------------|
| 12586 | 7  | 112248979 | 112248979 | T | C | T | Y    | UTR3       | C7orf60  | NA       | NA                   |
| 12586 | 7  | 136350555 | 136350555 | C | A | C | M    | exonic     | CHRM2    | silent   | NM_001006629:p.R135R |
| 12586 | 7  | 136351543 | 136351543 | C | G | C | S    | exonic     | CHRM2    | missense | NM_001006629:p.A464G |
| 12586 | 7  | 141073701 | 141073701 | T | A | T | W    | exonic     | WEE2     | silent   | NM_001105558:p.T507T |
| 12586 | 7  | 141125536 | 141125536 | G | T | G | K    | exonic     | TAS2R4   | missense | NM_016944:p.G260V    |
| 12586 | 7  | 142149020 | 142149020 | C | G | C | S    | intergenic | NA       | NA       | NA                   |
| 12586 | 7  | 142851555 | 142851555 | G | T | G | K    | exonic     | TAS2R60  | silent   | NM_177437:p.L296L    |
| 12586 | 7  | 143437716 | 143437716 | C | A | C | M    | exonic     | OR2A2    | silent   | NM_001005480:p.L36L  |
| 12586 | 7  | 148482359 | 148482359 | C | - | T | */-C | exonic     | ZNF398   | FS_del   | NM_170686:p.I138fs   |
| 12586 | 7  | 150341383 | 150341383 | G | T | G | K    | exonic     | NOS3     | nonsense | NM_000603:p.E1080X   |
| 12586 | 8  | 11644966  | 11644966  | C | A | C | M    | intronic   | GATA4    | NA       | NA                   |
| 12586 | 8  | 24831985  | 24831985  | T | C | T | Y    | exonic     | NEFM     | silent   | NM_005382:p.T904T    |
| 12586 | 8  | 41673173  | 41673173  | G | T | G | K    | exonic     | ANK1     | missense | NM_000037:p.T942K    |
| 12586 | 8  | 50816121  | 50816121  | C | T | C | Y    | intergenic | NA       | NA       | NA                   |
| 12586 | 8  | 51628356  | 51628356  | A | G | A | R    | intronic   | SNTG1    | NA       | NA                   |
| 12586 | 8  | 69715205  | 69715205  | G | C | G | S    | exonic     | C8orf34  | silent   | NM_052958:p.L382L    |
| 12586 | 8  | 80841501  | 80841501  | C | A | C | M    | exonic     | HEY1     | missense | NM_001040708:p.A95S  |
| 12586 | 8  | 82522116  | 82522116  | T | C | T | Y    | exonic     | PMP2     | missense | NM_002677:p.M21V     |
| 12586 | 8  | 87311402  | 87311402  | A | G | A | R    | exonic     | SLC7A13  | missense | NM_138817:p.F74S     |
| 12586 | 8  | 87629603  | 87629603  | C | T | C | Y    | intronic   | CPNE3    | NA       | NA                   |
| 12586 | 8  | 98934927  | 98934927  | A | T | A | W    | downstream | LAPTM4B  | NA       | NA                   |
| 12586 | 8  | 100315873 | 100315873 | C | T | C | Y    | intronic   | VPS13B   | NA       | NA                   |
| 12586 | 8  | 111637667 | 111637667 | G | C | G | S    | intergenic | NA       | NA       | NA                   |
| 12586 | 8  | 113346981 | 113346981 | C | A | C | M    | exonic     | CSMD3    | missense | NM_198123:p.D3175Y   |
| 12586 | 8  | 113383422 | 113383422 | C | T | C | Y    | intronic   | CSMD3    | NA       | NA                   |
| 12586 | 8  | 134093479 | 134093479 | A | G | A | R    | intronic   | TG       | NA       | NA                   |
| 12586 | 9  | 15045608  | 15045608  | G | T | G | K    | intergenic | NA       | NA       | NA                   |
| 12586 | 9  | 33603894  | 33603894  | G | A | G | R    | intergenic | NA       | NA       | NA                   |
| 12586 | 9  | 37720976  | 37720976  | C | A | C | M    | intronic   | FRMPD1   | NA       | NA                   |
| 12586 | 9  | 67916061  | 67916061  | G | A | G | R    | intergenic | NA       | NA       | NA                   |
| 12586 | 9  | 77207233  | 77207233  | C | A | C | M    | intergenic | NA       | NA       | NA                   |
| 12586 | 9  | 92646131  | 92646131  | A | G | A | R    | exonic     | SYK      | missense | NM_001135052:p.S44G  |
| 12586 | 9  | 102086427 | 102086427 | C | T | C | Y    | exonic     | INVS     | nonsense | NM_183245:p.R597X    |
| 12586 | 9  | 106420280 | 106420280 | C | A | C | M    | exonic     | OR13C9   | silent   | NM_001001956:p.L9L   |
| 12586 | 9  | 118810251 | 118810251 | C | A | C | M    | exonic     | ASTN2    | missense | NM_014010:p.R460M    |
| 12586 | 9  | 119016542 | 119016542 | C | T | C | Y    | exonic     | ASTN2    | missense | NM_014010:p.E311K    |
| 12586 | 9  | 134972308 | 134972308 | C | A | C | M    | exonic     | RALGDS   | missense | NM_006266:p.W466C    |
| 12586 | 9  | 135370393 | 135370393 | G | A | G | R    | intronic   | TMEM8C   | NA       | NA                   |
| 12586 | 10 | 6100167   | 6100167   | G | C | G | S    | intronic   | IL2RA    | NA       | NA                   |
| 12586 | 10 | 15295721  | 15295721  | C | A | C | M    | exonic     | FAM171A1 | silent   | NM_001010924:p.G624G |
| 12586 | 10 | 15295965  | 15295965  | C | A | C | M    | exonic     | FAM171A1 | missense | NM_001010924:p.R543L |
| 12586 | 10 | 26495058  | 26495058  | G | T | G | K    | exonic     | MYO3A    | missense | NM_017433:p.C1019F   |
| 12586 | 10 | 26548162  | 26548162  | G | C | G | S    | exonic     | GAD2     | missense | NM_001134366:p.E157D |
| 12586 | 10 | 32137597  | 32137597  | G | A | G | R    | exonic     | ARHGAP12 | silent   | NM_018287:p.F784F    |
| 12586 | 10 | 41710390  | 41710390  | G | A | G | R    | intergenic | NA       | NA       | NA                   |
| 12586 | 10 | 73181396  | 73181396  | A | T | A | W    | intronic   | C10orf54 | NA       | NA                   |
| 12586 | 10 | 85958427  | 85958427  | C | T | C | Y    | intronic   | CDHR1    | NA       | NA                   |
| 12586 | 10 | 86141584  | 86141584  | C | T | C | Y    | intronic   | FAM190B  | NA       | NA                   |
| 12586 | 10 | 91133979  | 91133979  | C | A | C | M    | exonic     | IFIT1B   | missense | NM_001010987:p.P310H |
| 12586 | 10 | 100232503 | 100232503 | G | A | G | R    | exonic     | HPSE2    | missense | NM_001166246:p.T498I |
| 12586 | 10 | 102247416 | 102247416 | C | G | C | S    | exonic     | SEC31B   | missense | NM_015490:p.C663S    |
| 12586 | 10 | 115345404 | 115345404 | G | T | G | K    | exonic     | NRAP     | silent   | NM_006175:p.R1467R   |
| 12586 | 10 | 134413041 | 134413041 | G | T | G | K    | exonic     | INPP5A   | missense | NM_005539:p.V255F    |
| 12586 | 10 | 134499709 | 134499709 | G | A | G | R    | exonic     | C10orf92 | silent   | NM_001200049:p.S492S |
| 12586 | 11 | 5418896   | 5418896   | C | G | C | S    | exonic     | OR51I1   | missense | NM_001005288:p.R142P |
| 12586 | 11 | 5558910   | 5558910   | T | A | T | W    | exonic     | OR52B6   | missense | NM_001005162:p.H76Q  |
| 12586 | 11 | 6595516   | 6595516   | C | A | C | M    | exonic     | TPP1     | silent   | NM_000391:p.V99V     |
| 12586 | 11 | 22248457  | 22248457  | G | T | G | K    | exonic     | ANOS     | missense | NM_213599:p.R641L    |
| 12586 | 11 | 34068310  | 34068310  | G | C | G | S    | exonic     | CAPRIN1  | missense | NM_203364:p.L434F    |
| 12586 | 11 | 35946241  | 35946241  | G | T | G | K    | intronic   | LDLRAD3  | NA       | NA                   |
| 12586 | 11 | 44051592  | 44051592  | A | G | A | R    | exonic     | ACCS     | missense | NM_001127219:p.Q123R |
| 12586 | 11 | 46774905  | 46774905  | G | T | G | K    | intronic   | CKAP5    | NA       | NA                   |
| 12586 | 11 | 48606235  | 48606235  | C | A | C | M    | intergenic | NA       | NA       | NA                   |
| 12586 | 11 | 54793404  | 54793404  | C | A | C | M    | intronic   | TRIM48   | NA       | NA                   |
| 12586 | 11 | 55000297  | 55000297  | G | A | G | R    | intergenic | NA       | NA       | NA                   |
| 12586 | 11 | 57715490  | 57715490  | C | A | C | M    | UTR3       | OR9Q2    | NA       | NA                   |
| 12586 | 11 | 57751914  | 57751914  | G | A | G | R    | downstream | OR10Q1   | NA       | NA                   |
| 12586 | 11 | 60391601  | 60391601  | G | T | G | K    | UTR5       | ZP1      | NA       | NA                   |
| 12586 | 11 | 60848077  | 60848077  | T | C | T | Y    | exonic     | DDB1     | missense | NM_001923:p.M291V    |
| 12586 | 11 | 62519925  | 62519925  | G | T | G | K    | intronic   | SLC22A8  | NA       | NA                   |
| 12586 | 11 | 64253033  | 64253033  | C | T | C | Y    | exonic     | RASGRP2  | missense | NM_153819:p.R550H    |
| 12586 | 11 | 64253034  | 64253034  | G | T | G | K    | exonic     | RASGRP2  | missense | NM_153819:p.R550S    |
| 12586 | 11 | 65374218  | 65374218  | C | A | C | M    | exonic     | SNX32    | missense | NM_152760:p.P92T     |
| 12586 | 11 | 65375084  | 65375084  | C | A | C | M    | intronic   | SNX32    | NA       | NA                   |
| 12586 | 11 | 65949142  | 65949142  | C | A | C | M    | exonic     | NPAS4    | silent   | NM_178864:p.G735G    |
| 12586 | 11 | 69957254  | 69957254  | G | T | G | K    | intronic   | CTTN     | NA       | NA                   |
| 12586 | 11 | 75846878  | 75846878  | G | A | G | R    | exonic     | C11orf30 | missense | NM_020193:p.M83I     |
| 12586 | 11 | 107711791 | 107711791 | G | T | G | K    | exonic     | ATM      | missense | NM_000051:p.D2721Y   |
| 12586 | 11 | 109630045 | 109630045 | C | A | C | M    | splicing   | RDX      | NA       | NA                   |

|       |    |           |           |   |   |   |      |            |             |          |                       |
|-------|----|-----------|-----------|---|---|---|------|------------|-------------|----------|-----------------------|
| 12586 | 11 | 120934795 | 120934795 | G | T | G | K    | intronic   | SORL1       | NA       | NA                    |
| 12586 | 11 | 133542997 | 133542997 | C | T | C | Y    | intronic   | NCAPD3      | NA       | NA                    |
| 12586 | 12 | 3635880   | 3635880   | C | A | C | M    | intronic   | EFCAB4B     | NA       | NA                    |
| 12586 | 12 | 4724874   | 4724874   | T | A | T | W    | exonic     | GALNT8      | silent   | NM_017417:p.A293A     |
| 12586 | 12 | 7531663   | 7531663   | T | A | T | W    | exonic     | CD163       | missense | NM_004244:p.S570C     |
| 12586 | 12 | 15548056  | 15548056  | G | T | G | K    | intronic   | PTPRO       | NA       | NA                    |
| 12586 | 12 | 25289552  | 25289552  | C | A | C | M    | exonic     | KRAS        | missense | NM_033360:p.G12C      |
| 12586 | 12 | 40750083  | 40750083  | C | A | C | M    | intergenic | NA          | NA       | NA                    |
| 12586 | 12 | 50568975  | 50568975  | G | T | G | K    | intronic   | ANKRD33     | NA       | NA                    |
| 12586 | 12 | 53928128  | 53928128  | G | A | G | R    | exonic     | OR6C74      | missense | NM_001005490:p.E264K  |
| 12586 | 12 | 54840051  | 54840051  | T | G | T | K    | exonic     | MYL6        | missense | NM_079423:p.F67L      |
| 12586 | 12 | 56252681  | 56252681  | G | T | G | K    | exonic     | KIF5A       | nonsense | NM_004984:p.G541X     |
| 12586 | 12 | 62503022  | 62503022  | G | T | G | K    | intergenic | NA          | NA       | NA                    |
| 12586 | 12 | 67880218  | 67880218  | C | T | C | Y    | intergenic | NA          | NA       | NA                    |
| 12586 | 12 | 68351691  | 68351691  | T | C | T | Y    | intronic   | BEST3       | NA       | NA                    |
| 12586 | 12 | 82069899  | 82069899  | G | T | G | K    | intergenic | NA          | NA       | NA                    |
| 12586 | 12 | 88671103  | 88671103  | C | A | C | M    | intergenic | NA          | NA       | NA                    |
| 12586 | 12 | 95575969  | 95575969  | G | T | G | K    | intergenic | NA          | NA       | NA                    |
| 12586 | 12 | 106678387 | 106678387 | T | C | T | Y    | intronic   | PRDM4       | NA       | NA                    |
| 12586 | 12 | 107455910 | 107455910 | C | G | C | S    | intronic   | SART3       | NA       | NA                    |
| 12586 | 12 | 112294824 | 112294824 | C | T | C | Y    | intronic   | PLBD2       | NA       | NA                    |
| 12586 | 12 | 116210333 | 116210333 | G | T | G | K    | exonic     | NOS1        | missense | NM_000620:p.D352E     |
| 12586 | 12 | 125915836 | 125915836 | G | T | G | K    | intergenic | NA          | NA       | NA                    |
| 12586 | 12 | 128066155 | 128066155 | C | A | C | M    | intergenic | NA          | NA       | NA                    |
| 12586 | 12 | 129851744 | 129851744 | G | A | G | R    | exonic     | STX2        | silent   | NM_001980:p.I194I     |
| 12586 | 13 | 35642692  | 35642692  | C | T | C | Y    | exonic     | C13orf38-SO | silent   | NM_017826:p.T411T     |
| 12586 | 13 | 40415235  | 40415235  | T | A | T | W    | exonic     | ELF1        | missense | NM_001145353:p.D196V  |
| 12586 | 13 | 47461017  | 47461017  | C | T | C | Y    | splicing   | SUCLA2      | NA       | NA                    |
| 12586 | 13 | 51381494  | 51381494  | G | A | G | R    | intergenic | NA          | NA       | NA                    |
| 12586 | 13 | 51432254  | 51432254  | G | A | G | R    | intronic   | ATP7B       | NA       | NA                    |
| 12586 | 13 | 74710531  | 74710531  | C | A | C | M    | ncRNA      | CTAGE11P    | NA       | NA                    |
| 12586 | 13 | 74710532  | 74710532  | C | G | C | S    | ncRNA      | CTAGE11P    | NA       | NA                    |
| 12586 | 14 | 19366030  | 19366030  | G | T | G | K    | exonic     | OR4N2       | missense | NM_001004723:p.V195L  |
| 12586 | 14 | 19414308  | 19414308  | G | T | G | K    | exonic     | OR4K2       | missense | NM_001005501:p.L14F   |
| 12586 | 14 | 20596209  | 20596209  | C | A | C | M    | exonic     | RNASE8      | silent   | NM_138331:p.T106T     |
| 12586 | 14 | 22935332  | 22935332  | C | A | C | M    | splicing   | MYH6        | NA       | NA                    |
| 12586 | 14 | 22944464  | 22944464  | G | T | G | K    | intronic   | MYH6        | NA       | NA                    |
| 12586 | 14 | 23594250  | 23594250  | T | A | T | W    | intronic   | LRRC16B     | NA       | NA                    |
| 12586 | 14 | 51804820  | 51804820  | G | T | G | K    | exonic     | PTGDR       | missense | NM_000953:p.G180C     |
| 12586 | 14 | 64329799  | 64329799  | G | A | G | R    | exonic     | SPTB        | missense | NM_001024858:p.R779W  |
| 12586 | 14 | 66885451  | 66885451  | T | A | T | W    | intronic   | ATP6V1D     | NA       | NA                    |
| 12586 | 14 | 67948032  | 67948032  | G | T | G | K    | intronic   | RAD51L1     | NA       | NA                    |
| 12586 | 14 | 85158014  | 85158014  | C | G | C | S    | exonic     | FLRT2       | missense | NM_013231:p.L135V     |
| 12586 | 15 | 22783117  | 22783117  | C | T | C | Y    | ncRNA      | PAR5        | NA       | NA                    |
| 12586 | 15 | 22861245  | 22861245  | C | T | C | Y    | upstream   | SNORD116-2  | NA       | NA                    |
| 12586 | 15 | 23014929  | 23014929  | G | T | G | K    | ncRNA      | SNORD115-2  | NA       | NA                    |
| 12586 | 15 | 28896148  | 28896148  | G | T | G | K    | intergenic | NA          | NA       | NA                    |
| 12586 | 15 | 28962511  | 28962511  | G | T | G | K    | intergenic | NA          | NA       | NA                    |
| 12586 | 15 | 32461153  | 32461153  | C | A | C | M    | ncRNA      | GOLGA8A     | NA       | NA                    |
| 12586 | 15 | 41780829  | 41780829  | C | A | C | M    | intergenic | NA          | NA       | NA                    |
| 12586 | 15 | 46821518  | 46821518  | C | T | C | Y    | exonic     | CEP152      | missense | NM_001194998:p.E1303K |
| 12586 | 15 | 70478078  | 70478078  | G | T | G | K    | exonic     | TMEM202     | missense | NM_001080462:p.A38S   |
| 12586 | 15 | 89093827  | 89093827  | C | T | C | Y    | exonic     | BLM         | missense | NM_000057:p.P109S     |
| 12586 | 15 | 89093828  | 89093828  | C | T | C | Y    | exonic     | BLM         | missense | NM_000057:p.P109L     |
| 12586 | 15 | 98150099  | 98150099  | T | A | T | W    | ncRNA      | C15orf51    | NA       | NA                    |
| 12586 | 16 | 21005814  | 21005814  | T | G | T | K    | exonic     | DNAH3       | missense | NM_017539:p.K912Q     |
| 12586 | 16 | 33287537  | 33287537  | C | A | C | M    | intergenic | NA          | NA       | NA                    |
| 12586 | 16 | 49343313  | 49343313  | G | T | G | K    | exonic     | CYLD        | missense | NM_001042412:p.D268Y  |
| 12586 | 16 | 71549761  | 71549761  | G | A | G | R    | exonic     | ZFX3        | silent   | NM_006885:p.A595A     |
| 12586 | 16 | 83658349  | 83658349  | G | - | T | */-G | exonic     | KIAA0513    | FS_del   | NM_014732:p.M57fs     |
| 12586 | 17 | 1317932   | 1317932   | G | A | G | R    | exonic     | MYO1C       | silent   | NM_033375:p.S938S     |
| 12586 | 17 | 7475968   | 7475968   | G | T | G | K    | exonic     | SHBG        | silent   | NM_001040:p.L254L     |
| 12586 | 17 | 7693679   | 7693679   | G | T | G | K    | exonic     | KDM6B       | missense | NM_001080424:p.E1116D |
| 12586 | 17 | 10102994  | 10102994  | A | G | A | R    | intergenic | NA          | NA       | NA                    |
| 12586 | 17 | 10372948  | 10372948  | C | A | C | M    | exonic     | MYH2        | missense | NM_017534:p.E1176D    |
| 12586 | 17 | 10387772  | 10387772  | T | A | T | W    | exonic     | MYH2        | missense | NM_017534:p.N241I     |
| 12586 | 17 | 16663876  | 16663876  | C | T | C | Y    | intergenic | NA          | NA       | NA                    |
| 12586 | 17 | 17047058  | 17047058  | A | T | A | W    | exonic     | PLD6        | silent   | NM_178836:p.T169T     |
| 12586 | 17 | 21146187  | 21146187  | C | G | C | S    | intronic   | MAP2K3      | NA       | NA                    |
| 12586 | 17 | 21655164  | 21655164  | C | A | C | M    | intergenic | NA          | NA       | NA                    |
| 12586 | 17 | 23898551  | 23898551  | C | A | C | M    | exonic     | UNC119      | missense | NM_005148:p.S205I     |
| 12586 | 17 | 44934502  | 44934502  | C | A | C | M    | exonic     | NGFR        | missense | NM_002507:p.L49M      |
| 12586 | 17 | 45912406  | 45912406  | G | T | G | K    | exonic     | RSAD1       | missense | NM_018346:p.G146W     |
| 12586 | 17 | 53704288  | 53704288  | T | A | T | W    | intronic   | MPO         | NA       | NA                    |
| 12586 | 17 | 57663561  | 57663561  | C | A | C | M    | intergenic | NA          | NA       | NA                    |
| 12586 | 17 | 64596026  | 64596026  | C | A | C | M    | intronic   | ABCA6       | NA       | NA                    |
| 12586 | 17 | 77604511  | 77604511  | G | T | G | K    | exonic     | GPS1        | missense | NM_212492:p.V76L      |
| 12586 | 18 | 12018944  | 12018944  | G | T | G | K    | exonic     | IMPA2       | missense | NM_014214:p.A235S     |
| 12586 | 18 | 21866382  | 21866382  | C | A | C | M    | exonic     | SS18        | missense | NM_005637:p.Q372H     |

|       |    |           |           |   |   |   |   |            |           |          |                       |
|-------|----|-----------|-----------|---|---|---|---|------------|-----------|----------|-----------------------|
| 12586 | 18 | 22039831  | 22039831  | G | T | G | K | intergenic | NA        | NA       | NA                    |
| 12586 | 18 | 29792266  | 29792266  | G | A | G | R | exonic     | NOL4      | missense | NM_001198548:p.H391Y  |
| 12586 | 18 | 32630865  | 32630865  | C | A | C | M | exonic     | C18orf10  | missense | NM_015476:p.Q268H     |
| 12586 | 18 | 72712825  | 72712825  | G | T | G | K | intronic   | ZNF236    | NA       | NA                    |
| 12586 | 19 | 8784914   | 8784914   | A | G | A | R | intronic   | ZNF558    | NA       | NA                    |
| 12586 | 19 | 11408025  | 11408025  | C | G | C | S | intronic   | PRKCSH    | NA       | NA                    |
| 12586 | 19 | 21208125  | 21208125  | G | T | G | K | intergenic | NA        | NA       | NA                    |
| 12586 | 19 | 22573912  | 22573912  | A | T | A | W | ncRNA      | LOC440518 | NA       | NA                    |
| 12586 | 19 | 22661281  | 22661281  | T | C | T | Y | intergenic | NA        | NA       | NA                    |
| 12586 | 19 | 22674215  | 22674215  | G | T | G | K | intergenic | NA        | NA       | NA                    |
| 12586 | 19 | 23466792  | 23466792  | G | T | G | K | intergenic | NA        | NA       | NA                    |
| 12586 | 19 | 23571610  | 23571610  | C | A | C | M | intergenic | NA        | NA       | NA                    |
| 12586 | 19 | 40738011  | 40738011  | G | A | G | R | exonic     | ATP4A     | silent   | NM_000704:p.I741I     |
| 12586 | 19 | 42059829  | 42059829  | G | T | G | K | exonic     | ZNF345    | missense | NM_003419:p.G86V      |
| 12586 | 19 | 44558239  | 44558239  | G | T | G | K | exonic     | SAMD4B    | silent   | NM_018028:p.R259R     |
| 12586 | 19 | 45402167  | 45402167  | G | C | G | S | intronic   | MAP3K10   | NA       | NA                    |
| 12586 | 19 | 47756673  | 47756673  | G | T | G | K | intergenic | NA        | NA       | NA                    |
| 12586 | 19 | 48399978  | 48399978  | C | A | C | M | exonic     | PSG4      | missense | NM_213633:p.Q110H     |
| 12586 | 19 | 49625493  | 49625493  | A | T | A | W | exonic     | ZNF229    | missense | NM_014518:p.C435S     |
| 12586 | 19 | 49625494  | 49625494  | G | T | G | K | exonic     | ZNF229    | silent   | NM_014518:p.T434T     |
| 12586 | 19 | 58998941  | 58998941  | G | T | G | K | intronic   | NLRP12    | NA       | NA                    |
| 12586 | 19 | 63550504  | 63550504  | A | T | A | W | intronic   | A1BG      | NA       | NA                    |
| 12586 | 19 | 63760060  | 63760060  | C | A | C | M | intronic   | UBE2M     | NA       | NA                    |
| 12586 | 20 | 1856563   | 1856563   | C | A | C | M | intronic   | SIRPA     | NA       | NA                    |
| 12586 | 20 | 1856564   | 1856564   | C | A | C | M | intronic   | SIRPA     | NA       | NA                    |
| 12586 | 20 | 5791950   | 5791950   | C | T | C | Y | exonic     | C20orf196 | silent   | NM_152504:p.N153N     |
| 12586 | 20 | 21671578  | 21671578  | C | A | C | M | intergenic | NA        | NA       | NA                    |
| 12586 | 20 | 23369096  | 23369096  | C | A | C | M | exonic     | CSTL1     | silent   | NM_138283:p.V64V      |
| 12586 | 20 | 25200042  | 25200042  | A | T | A | W | exonic     | PYGB      | missense | NM_002862:p.T150S     |
| 12586 | 20 | 29336794  | 29336794  | C | A | C | M | intergenic | NA        | NA       | NA                    |
| 12586 | 20 | 35097307  | 35097307  | G | A | G | R | exonic     | RBL1      | missense | NM_183404:p.P641L     |
| 12586 | 20 | 42574804  | 42574804  | G | A | G | R | intronic   | SERINC3   | NA       | NA                    |
| 12586 | 20 | 43376511  | 43376511  | T | C | T | Y | exonic     | RBPJL     | silent   | NM_014276:p.D304D     |
| 12586 | 20 | 48629202  | 48629202  | G | T | G | K | exonic     | PTPN1     | missense | NM_002827:p.D265Y     |
| 12586 | 20 | 51305849  | 51305849  | G | T | G | K | exonic     | TSHZ2     | missense | NM_173485:p.R815S     |
| 12586 | 20 | 55574055  | 55574055  | C | T | C | Y | exonic     | PCK1      | missense | NM_002591:p.T553M     |
| 12586 | 20 | 60932291  | 60932291  | C | T | C | Y | intronic   | COL9A3    | NA       | NA                    |
| 12586 | 20 | 61516957  | 61516957  | A | G | A | R | intronic   | KCNQ2     | NA       | NA                    |
| 12586 | 21 | 29875609  | 29875609  | G | C | G | S | intronic   | GRIK1     | NA       | NA                    |
| 12586 | 22 | 14667549  | 14667549  | C | T | C | Y | exonic     | POTEH     | missense | NM_001136213:p.G113S  |
| 12586 | 22 | 15442012  | 15442012  | C | A | C | M | intergenic | NA        | NA       | NA                    |
| 12586 | 22 | 15719083  | 15719083  | C | A | C | M | intergenic | NA        | NA       | NA                    |
| 12586 | 22 | 24045884  | 24045884  | A | T | A | W | ncRNA      | IGLL3P    | NA       | NA                    |
| 12586 | 22 | 30536572  | 30536572  | G | A | G | R | exonic     | DEPDC5    | missense | NM_001007188:p.A464T  |
| 12586 | 22 | 40940917  | 40940917  | C | A | C | M | exonic     | TCF20     | silent   | NM_005650:p.G113G     |
| 12586 | 22 | 48742588  | 48742588  | A | G | A | R | intronic   | PIM3      | NA       | NA                    |
| 12586 | X  | 2955389   | 2955389   | C | A | C | M | exonic     | ARSH      | missense | NM_001011719:p.R358S  |
| 12586 | X  | 3249667   | 3249667   | T | A | T | W | exonic     | MXRA5     | silent   | NM_015419:p.P1353P    |
| 12586 | X  | 10495154  | 10495154  | C | A | C | M | exonic     | MID1      | missense | NM_001193280:p.C145F  |
| 12586 | X  | 15522984  | 15522984  | G | C | G | S | exonic     | ACE2      | missense | NM_021804:p.P84A      |
| 12586 | X  | 18930954  | 18930954  | G | T | G | K | exonic     | GPR64     | missense | NM_001184836:p.L697M  |
| 12586 | X  | 24676989  | 24676989  | G | T | G | K | exonic     | POLA1     | missense | NM_016937:p.A969S     |
| 12586 | X  | 32969422  | 32969422  | C | T | C | Y | intronic   | DMD       | NA       | NA                    |
| 12586 | X  | 37524195  | 37524195  | C | A | C | M | upstream   | CYBB      | NA       | NA                    |
| 12586 | X  | 40343926  | 40343926  | G | T | G | K | exonic     | ATP6AP2   | missense | NM_005765:p.A243S     |
| 12586 | X  | 46798542  | 46798542  | C | A | C | M | exonic     | PHF16     | silent   | NM_001077445:p.T337T  |
| 12586 | X  | 46917495  | 46917495  | G | T | G | K | exonic     | RBM10     | missense | NM_005676:p.G153C     |
| 12586 | X  | 49737711  | 49737711  | C | T | C | Y | intronic   | CLCN5     | NA       | NA                    |
| 12586 | X  | 53595965  | 53595965  | C | T | C | Y | intronic   | HUWE1     | NA       | NA                    |
| 12586 | X  | 54800388  | 54800388  | C | A | C | M | exonic     | ITIH5L    | silent   | NM_198510:p.P948P     |
| 12586 | X  | 56313540  | 56313540  | G | A | G | R | intronic   | KLF8      | NA       | NA                    |
| 12586 | X  | 74721062  | 74721062  | G | T | G | K | intergenic | NA        | NA       | NA                    |
| 12586 | X  | 78313413  | 78313413  | C | A | C | M | exonic     | GPR174    | missense | NM_032553:p.P85T      |
| 12586 | X  | 79715186  | 79715186  | C | G | C | S | intergenic | NA        | NA       | NA                    |
| 12586 | X  | 85954960  | 85954960  | A | G | A | R | intronic   | DACH2     | NA       | NA                    |
| 12586 | X  | 86659766  | 86659766  | A | T | A | W | exonic     | KLHL4     | missense | NM_019117:p.N72Y      |
| 12586 | X  | 91124708  | 91124708  | C | A | C | M | intronic   | PCDH11X   | NA       | NA                    |
| 12586 | X  | 100920977 | 100920977 | T | G | T | K | intergenic | NA        | NA       | NA                    |
| 12586 | X  | 112652650 | 112652650 | C | A | C | M | intergenic | NA        | NA       | NA                    |
| 12586 | X  | 125126588 | 125126588 | G | T | G | K | exonic     | DCAF12L2  | missense | NM_001013628:p.P334Q  |
| 12586 | X  | 125126957 | 125126957 | C | A | C | M | exonic     | DCAF12L2  | missense | NM_001013628:p.G211V  |
| 12586 | X  | 134637485 | 134637485 | G | T | G | K | intergenic | NA        | NA       | NA                    |
| 12586 | X  | 135259933 | 135259933 | T | A | T | W | exonic     | GPR112    | silent   | NM_153834:p.S2134S    |
| 12586 | X  | 147862768 | 147862768 | G | C | G | S | exonic     | AFF2      | missense | NM_001169122:p.D1081H |
| 12586 | X  | 150843434 | 150843434 | C | A | C | M | exonic     | MAGEA4    | silent   | NM_002362:p.G214G     |
| 12586 | M  | 2073      | 2073      | T | C | T | C | intergenic | NA        | NA       | NA                    |
| 12804 | 1  | 154502857 | 154502857 | T | C | T | Y | intronic   | SMG5      | NA       | NA                    |
| 12804 | 1  | 161216015 | 161216015 | T | G | T | K | intergenic | NA        | NA       | NA                    |
| 12804 | 1  | 161216016 | 161216016 | C | T | C | Y | intergenic | NA        | NA       | NA                    |

|       |    |           |           |   |   |   |      |            |          |          |                       |
|-------|----|-----------|-----------|---|---|---|------|------------|----------|----------|-----------------------|
| 12804 | 1  | 198449771 | 198449771 | C | T | C | Y    | exonic     | FAM58B   | silent   | NM_001105517:p.L153L  |
| 12804 | 1  | 214313160 | 214313160 | G | T | G | K    | exonic     | USH2A    | nonsense | NM_206933:p.S1893X    |
| 12804 | 1  | 222202493 | 222202493 | T | C | T | Y    | intergenic | NA       | NA       | NA                    |
| 12804 | 1  | 234034395 | 234034395 | C | A | C | M    | intronic   | LYST     | NA       | NA                    |
| 12804 | 2  | 73306322  | 73306322  | G | C | G | S    | exonic     | SMYD5    | missense | NM_006062:p.R364P     |
| 12804 | 2  | 90977396  | 90977396  | G | T | G | K    | intergenic | NA       | NA       | NA                    |
| 12804 | 2  | 113238564 | 113238564 | C | A | C | M    | intronic   | CKAP2L   | NA       | NA                    |
| 12804 | 2  | 113238565 | 113238565 | C | A | C | M    | intronic   | CKAP2L   | NA       | NA                    |
| 12804 | 2  | 176774065 | 176774065 | G | T | G | K    | intergenic | NA       | NA       | NA                    |
| 12804 | 2  | 203730695 | 203730695 | T | C | T | Y    | exonic     | NBEAL1   | silent   | NM_001114132:p.D1843D |
| 12804 | 3  | 150384097 | 150384097 | C | A | C | M    | intronic   | CP       | NA       | NA                    |
| 12804 | 4  | 74683316  | 74683316  | A | T | A | W    | intronic   | RASSF6   | NA       | NA                    |
| 12804 | 4  | 140652441 | 140652441 | G | A | G | R    | exonic     | SETD7    | silent   | NM_030648:p.V309V     |
| 12804 | 5  | 7869971   | 7869971   | G | T | G | K    | intronic   | ADCY2    | NA       | NA                    |
| 12804 | 5  | 33631840  | 33631840  | G | C | G | S    | exonic     | ADAMTS12 | silent   | NM_030955:p.P870P     |
| 12804 | 5  | 35831556  | 35831556  | A | - | T | */-A | intronic   | SPEF2    | NA       | NA                    |
| 12804 | 7  | 6047147   | 6047147   | G | A | G | R    | exonic     | EIF2AK1  | nonsense | NM_014413:p.Q341X     |
| 12804 | 7  | 57702178  | 57702178  | T | C | T | Y    | intergenic | NA       | NA       | NA                    |
| 12804 | 8  | 34851489  | 34851489  | A | G | A | R    | intergenic | NA       | NA       | NA                    |
| 12804 | 9  | 113494136 | 113494136 | C | T | C | Y    | exonic     | C9orf84  | silent   | NM_001080551:p.Q1211Q |
| 12804 | 11 | 95235036  | 95235036  | T | A | T | W    | ncRNA      | MTMR2    | NA       | NA                    |
| 12804 | 12 | 93342922  | 93342922  | A | G | A | R    | intronic   | CCDC41   | NA       | NA                    |
| 12804 | 12 | 116180684 | 116180684 | T | A | T | W    | intronic   | NOS1     | NA       | NA                    |
| 12804 | 13 | 28779308  | 28779308  | G | T | G | K    | intronic   | MTUS2    | NA       | NA                    |
| 12804 | 13 | 41398339  | 41398339  | C | T | C | Y    | intronic   | KIAA0564 | NA       | NA                    |
| 12804 | 13 | 45475416  | 45475416  | G | A | G | R    | exonic     | ZC3H13   | missense | NM_015070:p.P268L     |
| 12804 | 14 | 102262519 | 102262519 | C | T | C | Y    | intronic   | RCOR1    | NA       | NA                    |
| 12804 | 14 | 103289037 | 103289037 | A | T | A | W    | intronic   | PPP1R13B | NA       | NA                    |
| 12804 | 16 | 3059385   | 3059385   | C | A | C | M    | UTR3       | IL32     | NA       | NA                    |
| 12804 | 16 | 21078248  | 21078248  | G | T | G | K    | exonic     | DNAH3    | missense | NM_017539:p.R65       |
| 12804 | 16 | 33857854  | 33857854  | G | C | G | S    | intergenic | NA       | NA       | NA                    |
| 12804 | 16 | 33866278  | 33866278  | G | A | G | R    | intergenic | NA       | NA       | NA                    |
| 12804 | 16 | 33866293  | 33866293  | T | A | T | W    | intergenic | NA       | NA       | NA                    |
| 12804 | 16 | 34436153  | 34436153  | C | A | C | M    | intergenic | NA       | NA       | NA                    |
| 12804 | 16 | 69148485  | 69148485  | A | T | A | W    | intronic   | SF3B3    | NA       | NA                    |
| 12804 | 17 | 8354100   | 8354100   | G | T | G | K    | intronic   | MYH10    | NA       | NA                    |
| 12804 | 19 | 32424194  | 32424194  | A | G | A | R    | intergenic | NA       | NA       | NA                    |
| 12804 | 20 | 60769686  | 60769686  | G | T | G | K    | exonic     | SLCO4A1  | missense | NM_016354:p.E539D     |
| 12804 | 20 | 61546593  | 61546593  | C | A | C | M    | exonic     | KCNQ2    | missense | NM_172106:p.A185S     |
| 12804 | X  | 9995365   | 9995365   | C | T | C | Y    | exonic     | WWC3     | nonsense | NM_015691:p.R19X      |
| 12804 | X  | 35899885  | 35899885  | G | T | G | K    | intronic   | CXorf22  | NA       | NA                    |
| 12804 | X  | 40635320  | 40635320  | G | T | G | K    | intergenic | NA       | NA       | NA                    |
| 12804 | X  | 82650909  | 82650909  | G | T | G | K    | exonic     | POU3F4   | missense | NM_000307:p.E307D     |
| 12804 | X  | 92364715  | 92364715  | A | T | A | W    | intergenic | NA       | NA       | NA                    |
| 12804 | X  | 153597687 | 153597687 | G | T | G | K    | exonic     | GAB3     | missense | NM_080612:p.L62I      |
| 12820 | 1  | 3635844   | 3635844   | C | T | C | Y    | exonic     | TP73     | missense | NM_001126240:p.R341W  |
| 12820 | 1  | 5655269   | 5655269   | T | C | T | Y    | intergenic | NA       | NA       | NA                    |
| 12820 | 1  | 7770844   | 7770844   | A | G | R | W    | exonic     | PER3     | silent   | NM_016831:p.A181A     |
| 12820 | 1  | 8312858   | 8312858   | C | A | C | M    | exonic     | SLC45A1  | missense | NM_001080397:p.L240I  |
| 12820 | 1  | 12341078  | 12341078  | C | T | C | Y    | intronic   | VPS13D   | NA       | NA                    |
| 12820 | 1  | 16205315  | 16205315  | C | A | C | M    | exonic     | C1orf64  | missense | NM_178840:p.P133T     |
| 12820 | 1  | 17227693  | 17227693  | C | T | C | Y    | exonic     | SDHB     | missense | NM_003000:p.D138N     |
| 12820 | 1  | 27406499  | 27406499  | T | A | T | W    | intergenic | NA       | NA       | NA                    |
| 12820 | 1  | 52026105  | 52026105  | A | G | A | R    | ncRNA      | OSBPL9   | NA       | NA                    |
| 12820 | 1  | 71285042  | 71285042  | G | T | G | K    | exonic     | PTGER3   | silent   | NM_198716:p.S269S     |
| 12820 | 1  | 71285043  | 71285043  | G | T | G | K    | exonic     | PTGER3   | missense | NM_198716:p.S269Y     |
| 12820 | 1  | 84324423  | 84324423  | G | T | G | K    | intronic   | PRKACB   | NA       | NA                    |
| 12820 | 1  | 89441726  | 89441726  | T | C | T | Y    | intergenic | NA       | NA       | NA                    |
| 12820 | 1  | 94240164  | 94240164  | G | T | G | K    | intronic   | ABCA4    | NA       | NA                    |
| 12820 | 1  | 97785183  | 97785183  | G | A | G | R    | intronic   | DPYD     | NA       | NA                    |
| 12820 | 1  | 103161526 | 103161526 | G | T | G | K    | exonic     | COL11A1  | missense | NM_001854:p.P1203Q    |
| 12820 | 1  | 141481072 | 141481072 | T | A | T | W    | intergenic | NA       | NA       | NA                    |
| 12820 | 1  | 141806195 | 141806195 | G | A | G | R    | intergenic | NA       | NA       | NA                    |
| 12820 | 1  | 142291151 | 142291151 | A | T | A | W    | intergenic | NA       | NA       | NA                    |
| 12820 | 1  | 146861194 | 146861194 | A | G | A | R    | exonic     | NBPF15   | missense | NM_173638:p.N648S     |
| 12820 | 1  | 147358939 | 147358939 | G | A | G | R    | intergenic | NA       | NA       | NA                    |
| 12820 | 1  | 147360360 | 147360360 | G | T | G | K    | intergenic | NA       | NA       | NA                    |
| 12820 | 1  | 148183210 | 148183210 | C | A | C | M    | exonic     | OTUD7B   | missense | NM_020205:p.G568W     |
| 12820 | 1  | 149429064 | 149429064 | C | G | C | S    | intronic   | VPS72    | NA       | NA                    |
| 12820 | 1  | 155926324 | 155926324 | G | T | G | K    | exonic     | FCRL3    | silent   | NM_052939:p.S566S     |
| 12820 | 1  | 158366575 | 158366575 | C | T | C | Y    | exonic     | ATP1A2   | silent   | NM_000702:p.A507A     |
| 12820 | 1  | 166685559 | 166685559 | T | C | T | Y    | intergenic | NA       | NA       | NA                    |
| 12820 | 1  | 181054410 | 181054410 | G | A | G | R    | exonic     | NPL      | missense | NM_001200050:p.R171H  |
| 12820 | 1  | 194972683 | 194972683 | A | T | A | W    | exonic     | CFH      | missense | NM_000186:p.Q840H     |
| 12820 | 1  | 195275091 | 195275091 | T | A | T | W    | UTR3       | F13B     | NA       | NA                    |
| 12820 | 1  | 205339922 | 205339922 | G | T | G | K    | UTR3       | C4BPB    | NA       | NA                    |
| 12820 | 1  | 208030527 | 208030527 | A | G | A | R    | exonic     | IRF6     | silent   | NM_006147:p.V332V     |
| 12820 | 1  | 211047659 | 211047659 | G | C | G | S    | intronic   | TATDN3   | NA       | NA                    |
| 12820 | 1  | 238436870 | 238436870 | A | T | A | W    | exonic     | FMN2     | missense | NM_020066:p.E712V     |

|       |   |           |           |   |   |   |      |            |          |          |                       |  |
|-------|---|-----------|-----------|---|---|---|------|------------|----------|----------|-----------------------|--|
| 12820 | 1 | 240606933 | 240606933 | C | A | C | M    | intronic   | PLD5     | NA       | NA                    |  |
| 12820 | 1 | 244557023 | 244557023 | C | A | C | M    | intronic   | SMYD3    | NA       | NA                    |  |
| 12820 | 1 | 246179540 | 246179540 | C | G | C | S    | exonic     | OR2L8    | missense | NM_001001963:p.P253R  |  |
| 12820 | 2 | 38151356  | 38151356  | T | A | T | W    | UTR3       | CYP1B1   | NA       | NA                    |  |
| 12820 | 2 | 43818984  | 43818984  | A | T | A | W    | splicing   | PLEKHH2  | missense | NM_172069:p.T982S     |  |
| 12820 | 2 | 44146650  | 44146650  | T | A | T | W    | intergenic | NA       | NA       | NA                    |  |
| 12820 | 2 | 44146651  | 44146651  | A | T | A | W    | intergenic | NA       | NA       | NA                    |  |
| 12820 | 2 | 54336535  | 54336535  | C | T | C | Y    | exonic     | TSPYL6   | silent   | NM_001003937:p.A86A   |  |
| 12820 | 2 | 61269116  | 61269116  | C | T | C | Y    | exonic     | USP34    | silent   | NM_014709:p.S3422S    |  |
| 12820 | 2 | 71507310  | 71507310  | G | T | G | K    | exonic     | ZNF638   | missense | NM_001014972:p.L1601F |  |
| 12820 | 2 | 74760259  | 74760259  | C | T | C | Y    | exonic     | SEMA4F   | silent   | NM_004263:p.P576P     |  |
| 12820 | 2 | 90968556  | 90968556  | G | A | G | R    | intergenic | NA       | NA       | NA                    |  |
| 12820 | 2 | 100988837 | 100988837 | A | G | A | R    | intronic   | RPL31    | NA       | NA                    |  |
| 12820 | 2 | 106681224 | 106681224 | A | G | A | R    | intergenic | NA       | NA       | NA                    |  |
| 12820 | 2 | 119451607 | 119451607 | G | A | G | R    | intronic   | MARCO    | NA       | NA                    |  |
| 12820 | 2 | 128742791 | 128742791 | C | A | C | M    | exonic     | HS6ST1   | silent   | NM_004807:p.T217T     |  |
| 12820 | 2 | 152696990 | 152696990 | A | G | A | R    | intronic   | STAM2    | NA       | NA                    |  |
| 12820 | 2 | 159847952 | 159847952 | A | G | A | R    | intronic   | WDSUB1   | NA       | NA                    |  |
| 12820 | 2 | 160609682 | 160609682 | C | A | C | M    | exonic     | PLA2R1   | silent   | NM_001007267:p.R114R  |  |
| 12820 | 2 | 161846460 | 161846460 | C | A | C | M    | intergenic | NA       | NA       | NA                    |  |
| 12820 | 2 | 167814324 | 167814324 | G | T | G | K    | exonic     | XIRP2    | missense | NM_152381:p.D2726Y    |  |
| 12820 | 2 | 188057124 | 188057124 | C | A | C | M    | exonic     | TFPI     | silent   | NM_006287:p.P200P     |  |
| 12820 | 2 | 202427809 | 202427809 | C | T | C | Y    | intronic   | CDK15    | NA       | NA                    |  |
| 12820 | 2 | 205677399 | 205677399 | C | A | C | M    | exonic     | PARD3B   | missense | NM_057177:p.S170Y     |  |
| 12820 | 2 | 206983372 | 206983372 | T | C | T | Y    | intergenic | NA       | NA       | NA                    |  |
| 12820 | 2 | 216778127 | 216778127 | C | A | C | M    | intronic   | XRCC5    | NA       | NA                    |  |
| 12820 | 2 | 234345709 | 234345709 | A | T | A | W    | exonic     | UGT1A1   | missense | NM_019075:p.D453V     |  |
| 12820 | 3 | 11325456  | 11325456  | A | T | A | W    | splicing   | ATG7     | NA       | NA                    |  |
| 12820 | 3 | 38963406  | 38963406  | C | A | C | M    | intronic   | SCN11A   | NA       | NA                    |  |
| 12820 | 3 | 48577862  | 48577862  | G | T | G | K    | exonic     | COL7A1   | missense | NM_000094:p.H2838N    |  |
| 12820 | 3 | 49381019  | 49381019  | G | C | G | S    | intronic   | RHOA     | NA       | NA                    |  |
| 12820 | 3 | 74268530  | 74268530  | G | T | G | K    | intergenic | NA       | NA       | NA                    |  |
| 12820 | 3 | 97552142  | 97552142  | T | C | T | Y    | intergenic | NA       | NA       | NA                    |  |
| 12820 | 3 | 113471427 | 113471427 | A | C | A | M    | intronic   | SLC9A10  | NA       | NA                    |  |
| 12820 | 3 | 120106185 | 120106185 | C | T | C | Y    | splicing   | IGSF11   | missense | NM_152538:p.R284K     |  |
| 12820 | 3 | 121872071 | 121872071 | T | A | T | W    | splicing   | HGD      | NA       | NA                    |  |
| 12820 | 3 | 126780571 | 126780571 | T | C | T | Y    | exonic     | OSBPL11  | missense | NM_022776:p.T138A     |  |
| 12820 | 3 | 127617902 | 127617902 | G | C | G | S    | exonic     | CCDC37   | silent   | NM_182628:p.S93S      |  |
| 12820 | 3 | 132583708 | 132583708 | C | T | C | Y    | exonic     | NUDT16   | silent   | NM_152395:p.R89R      |  |
| 12820 | 3 | 134430834 | 134430834 | C | A | C | M    | UTR5       | TMEM108  | NA       | NA                    |  |
| 12820 | 3 | 140663857 | 140663857 | G | A | G | R    | intronic   | RBP2     | NA       | NA                    |  |
| 12820 | 3 | 147395824 | 147395824 | C | G | C | S    | ncRNA      | PLSCR4   | NA       | NA                    |  |
| 12820 | 3 | 148611335 | 148611335 | T | C | T | Y    | exonic     | ZIC1     | missense | NM_003412:p.M249T     |  |
| 12820 | 3 | 156724550 | 156724550 | A | C | A | M    | intronic   | PLCH1    | NA       | NA                    |  |
| 12820 | 3 | 175475791 | 175475791 | T | A | T | W    | intronic   | NLGN1    | NA       | NA                    |  |
| 12820 | 3 | 195888988 | 195888988 | C | - | G | */-C | exonic     | FAM43A   | FS_del   | NM_153690:p.S48fs     |  |
| 12820 | 3 | 195888990 | 195888990 | G | T | G | K    | exonic     | FAM43A   | missense | NM_153690:p.R49L      |  |
| 12820 | 3 | 195888991 | 195888991 | G | T | G | K    | exonic     | FAM43A   | silent   | NM_153690:p.R49R      |  |
| 12820 | 3 | 199191893 | 199191893 | G | T | G | K    | ncRNA      | LMLN     | NA       | NA                    |  |
| 12820 | 4 | 254381    | 254381    | C | T | C | Y    | downstream | ZNF732   | NA       | NA                    |  |
| 12820 | 4 | 5904015   | 5904015   | G | A | G | R    | intronic   | CRMP1    | NA       | NA                    |  |
| 12820 | 4 | 9437064   | 9437064   | C | T | C | Y    | UTR3       | SLC2A9   | NA       | NA                    |  |
| 12820 | 4 | 17439101  | 17439101  | G | A | G | R    | exonic     | NCAPG    | missense | NM_022346:p.E586K     |  |
| 12820 | 4 | 42119619  | 42119619  | T | C | T | Y    | exonic     | ATP8A1   | silent   | NM_006095:p.A1089A    |  |
| 12820 | 4 | 48806289  | 48806289  | C | G | C | S    | intergenic | NA       | NA       | NA                    |  |
| 12820 | 4 | 48817689  | 48817689  | C | T | C | Y    | intergenic | NA       | NA       | NA                    |  |
| 12820 | 4 | 71145095  | 71145095  | T | A | T | W    | intronic   | CSN3     | NA       | NA                    |  |
| 12820 | 4 | 73373487  | 73373487  | C | A | C | M    | intronic   | ADAMTS3  | NA       | NA                    |  |
| 12820 | 4 | 123441868 | 123441868 | A | T | A | W    | intronic   | KIAA1109 | NA       | NA                    |  |
| 12820 | 4 | 146516305 | 146516305 | G | T | G | K    | intergenic | NA       | NA       | NA                    |  |
| 12820 | 4 | 190724800 | 190724800 | T | C | T | Y    | intergenic | NA       | NA       | NA                    |  |
| 12820 | 4 | 191110249 | 191110249 | A | C | A | M    | intronic   | FRG1     | NA       | NA                    |  |
| 12820 | 5 | 1087953   | 1087953   | G | A | G | R    | exonic     | NKD2     | missense | NM_033120:p.R170H     |  |
| 12820 | 5 | 13770423  | 13770423  | C | A | C | M    | splicing   | DNAH5    | NA       | NA                    |  |
| 12820 | 5 | 13918730  | 13918730  | G | T | G | K    | intronic   | DNAH5    | NA       | NA                    |  |
| 12820 | 5 | 19519262  | 19519262  | C | G | C | S    | exonic     | CDH18    | missense | NM_001167667:p.V560L  |  |
| 12820 | 5 | 27024065  | 27024065  | C | G | C | S    | exonic     | CDH9     | missense | NM_016279:p.G45R      |  |
| 12820 | 5 | 36145839  | 36145839  | T | - | C | */-T | exonic     | LMBRD2   | FS_del   | NM_001007527:p.R586fs |  |
| 12820 | 5 | 37007856  | 37007856  | C | T | C | Y    | exonic     | NIPBL    | missense | NM_133433:p.P275L     |  |
| 12820 | 5 | 44149384  | 44149384  | T | C | T | Y    | intergenic | NA       | NA       | NA                    |  |
| 12820 | 5 | 71666553  | 71666553  | A | T | A | W    | intronic   | PTCD2    | NA       | NA                    |  |
| 12820 | 5 | 74132466  | 74132466  | T | C | T | Y    | exonic     | FAM169A  | missense | NM_015566:p.I366M     |  |
| 12820 | 5 | 79830072  | 79830072  | G | T | G | K    | intronic   | FAM151B  | NA       | NA                    |  |
| 12820 | 5 | 82870925  | 82870925  | C | A | C | M    | exonic     | VCAN     | nonsense | NM_001164097:p.S1129X |  |
| 12820 | 5 | 89819668  | 89819668  | G | T | G | K    | exonic     | POLR3G   | missense | NM_006467:p.M71I      |  |
| 12820 | 5 | 110466060 | 110466060 | G | T | G | K    | intronic   | WDR36    | NA       | NA                    |  |
| 12820 | 5 | 127669523 | 127669523 | T | C | T | Y    | exonic     | FBN2     | silent   | NM_001999:p.K1813K    |  |
| 12820 | 5 | 129504441 | 129504441 | T | A | T | W    | intronic   | CHSY3    | NA       | NA                    |  |
| 12820 | 5 | 140231017 | 140231017 | G | C | G | S    | exonic     | PCDHA11  | silent   | NM_018902:p.L715L     |  |



|       |    |           |           |   |   |   |   |            |           |          |                      |
|-------|----|-----------|-----------|---|---|---|---|------------|-----------|----------|----------------------|
| 12820 | 5  | 140533977 | 140533977 | T | A | T | W | exonic     | PCDHB7    | missense | NM_018940:p.F459L    |
| 12820 | 5  | 144715755 | 144715755 | C | T | C | Y | intergenic | NA        | NA       | NA                   |
| 12820 | 5  | 156525535 | 156525535 | C | T | C | Y | exonic     | FAM71B    | missense | NM_130899:p.V75I     |
| 12820 | 5  | 159991937 | 159991937 | G | C | G | S | exonic     | ATP10B    | missense | NM_025153:p.T466S    |
| 12820 | 6  | 28264424  | 28264424  | T | A | T | W | intergenic | NA        | NA       | NA                   |
| 12820 | 6  | 29249672  | 29249672  | C | A | C | M | exonic     | OR2J2     | nonsense | NM_030905:p.S94X     |
| 12820 | 6  | 29339398  | 29339398  | G | A | G | R | intergenic | NA        | NA       | NA                   |
| 12820 | 6  | 29664168  | 29664168  | C | G | C | S | exonic     | OR2H2     | silent   | NM_007160:p.V156V    |
| 12820 | 6  | 66555120  | 66555120  | G | C | G | S | ncRNA      | MCART3P   | NA       | NA                   |
| 12820 | 6  | 152664774 | 152664774 | C | A | C | M | exonic     | SYNE1     | nonsense | NM_182961:p.E5822X   |
| 12820 | 6  | 165815768 | 165815768 | T | A | T | W | intronic   | PDE10A    | NA       | NA                   |
| 12820 | 7  | 21923030  | 21923030  | T | C | T | Y | exonic     | CDC47L    | missense | NM_001127371:p.K11R  |
| 12820 | 7  | 31125394  | 31125394  | C | T | C | Y | intergenic | NA        | NA       | NA                   |
| 12820 | 7  | 34854801  | 34854801  | G | T | G | K | splicing   | NPSR1     | NA       | NA                   |
| 12820 | 7  | 36412555  | 36412555  | G | C | G | S | exonic     | ANLN      | missense | NM_018685:p.G243A    |
| 12820 | 7  | 38223430  | 38223430  | C | T | C | Y | splicing   | STAR3D3NL | silent   | NM_032016:p.N184N    |
| 12820 | 7  | 50563544  | 50563544  | A | G | A | R | intronic   | DDC       | NA       | NA                   |
| 12820 | 7  | 81169946  | 81169946  | C | G | C | S | exonic     | HGF       | missense | NM_000601:p.V692L    |
| 12820 | 7  | 94000512  | 94000512  | G | T | G | K | intronic   | CASD1     | NA       | NA                   |
| 12820 | 7  | 95638731  | 95638731  | T | C | T | Y | exonic     | SLC25A13  | missense | NM_014251:p.I407V    |
| 12820 | 7  | 99272028  | 99272028  | C | A | C | M | exonic     | CYP3A43   | missense | NM_057096:p.H30N     |
| 12820 | 7  | 100017608 | 100017608 | G | A | G | R | exonic     | LRCH4     | nonsense | NM_002319:p.R162X    |
| 12820 | 7  | 100048575 | 100048575 | G | C | G | S | intronic   | MOSPD3    | NA       | NA                   |
| 12820 | 7  | 134773617 | 134773617 | C | A | C | M | exonic     | CNOT4     | missense | NM_001190848:p.M1I   |
| 12820 | 7  | 134906386 | 134906386 | C | G | C | S | intronic   | NUP205    | NA       | NA                   |
| 12820 | 7  | 139728729 | 139728729 | C | A | C | M | exonic     | SLC37A3   | missense | NM_032295:p.V23L     |
| 12820 | 8  | 17052328  | 17052328  | G | T | G | K | intergenic | NA        | NA       | NA                   |
| 12820 | 8  | 22329458  | 22329458  | G | C | G | S | intronic   | SLC39A14  | NA       | NA                   |
| 12820 | 8  | 34300083  | 34300083  | C | T | C | Y | intergenic | NA        | NA       | NA                   |
| 12820 | 8  | 47610166  | 47610166  | G | T | G | K | intergenic | NA        | NA       | NA                   |
| 12820 | 8  | 95607678  | 95607678  | G | A | G | R | exonic     | KIAA1429  | missense | NM_015496:p.A657V    |
| 12820 | 8  | 109064658 | 109064658 | C | A | C | M | intronic   | RSPO2     | NA       | NA                   |
| 12820 | 8  | 110200506 | 110200506 | C | A | C | M | exonic     | TRHR      | silent   | NM_003301:p.P281P    |
| 12820 | 8  | 113416926 | 113416926 | G | T | G | K | intronic   | CSMD3     | NA       | NA                   |
| 12820 | 8  | 113720196 | 113720196 | G | T | G | K | exonic     | CSMD3     | missense | NM_198123:p.T1144K   |
| 12820 | 8  | 113737583 | 113737583 | T | C | T | Y | exonic     | CSMD3     | missense | NM_198123:p.N994D    |
| 12820 | 8  | 136726562 | 136726562 | A | G | A | R | intronic   | KHDRBS3   | NA       | NA                   |
| 12820 | 9  | 418274    | 418274    | C | T | C | Y | intronic   | DOCK8     | NA       | NA                   |
| 12820 | 9  | 8508246   | 8508246   | C | A | C | M | exonic     | PTPRD     | missense | NM_002839:p.G382V    |
| 12820 | 9  | 32625320  | 32625320  | C | G | C | S | exonic     | TAF1L     | missense | NM_153809:p.L86F     |
| 12820 | 9  | 67907090  | 67907090  | C | T | C | Y | intergenic | NA        | NA       | NA                   |
| 12820 | 9  | 67916061  | 67916061  | G | A | G | R | intergenic | NA        | NA       | NA                   |
| 12820 | 9  | 109656270 | 109656270 | C | A | C | M | intergenic | NA        | NA       | NA                   |
| 12820 | 9  | 116893059 | 116893059 | G | C | G | S | exonic     | TNC       | silent   | NM_002160:p.T20T     |
| 12820 | 9  | 129591487 | 129591487 | C | T | C | Y | exonic     | CDK9      | silent   | NM_001261:p.P321P    |
| 12820 | 9  | 130865644 | 130865644 | G | C | G | S | splicing   | FAM73B    | NA       | NA                   |
| 12820 | 9  | 133095947 | 133095947 | G | T | G | K | exonic     | NUP214    | nonsense | NM_005085:p.G2062X   |
| 12820 | 9  | 137579612 | 137579612 | C | A | C | M | exonic     | OBP2A     | missense | NM_014582:p.R118S    |
| 12820 | 10 | 7803746   | 7803746   | G | T | G | K | splicing   | ITIH2     | missense | NM_002216:p.E289D    |
| 12820 | 10 | 37273262  | 37273262  | T | A | T | W | intergenic | NA        | NA       | NA                   |
| 12820 | 10 | 44230068  | 44230068  | A | G | A | R | intergenic | NA        | NA       | NA                   |
| 12820 | 10 | 64614435  | 64614435  | G | A | G | R | exonic     | JMJD1C    | silent   | NM_004241:p.A2063A   |
| 12820 | 10 | 70002261  | 70002261  | C | G | C | S | exonic     | TET1      | missense | NM_030625:p.Q54E     |
| 12820 | 10 | 70002294  | 70002294  | A | G | A | R | exonic     | TET1      | missense | NM_030625:p.K65E     |
| 12820 | 10 | 75069592  | 75069592  | G | A | G | R | intronic   | MYOZ1     | NA       | NA                   |
| 12820 | 10 | 99186338  | 99186338  | G | T | G | K | intronic   | EXOSC1    | NA       | NA                   |
| 12820 | 10 | 118189023 | 118189023 | C | T | C | Y | intronic   | PNLIPRP3  | NA       | NA                   |
| 12820 | 11 | 4800262   | 4800262   | C | G | C | S | downstream | OR51F2    | NA       | NA                   |
| 12820 | 11 | 5687204   | 5687204   | G | T | G | K | exonic     | TRIM22    | missense | NM_006074:p.C416F    |
| 12820 | 11 | 17390860  | 17390860  | G | C | G | S | exonic     | ABCC8     | missense | NM_000352:p.L829V    |
| 12820 | 11 | 22237793  | 22237793  | C | T | C | Y | exonic     | ANO5      | silent   | NM_213599:p.C520C    |
| 12820 | 11 | 22340914  | 22340914  | T | A | T | W | exonic     | SLC17A6   | missense | NM_020346:p.Y239N    |
| 12820 | 11 | 23458092  | 23458092  | C | T | C | Y | intergenic | NA        | NA       | NA                   |
| 12820 | 11 | 25118757  | 25118757  | C | A | C | M | intergenic | NA        | NA       | NA                   |
| 12820 | 11 | 26539316  | 26539316  | C | G | C | S | exonic     | MUC15     | missense | NM_145650:p.D293H    |
| 12820 | 11 | 47222971  | 47222971  | C | A | C | M | exonic     | ACP2      | silent   | NM_001610:p.P221P    |
| 12820 | 11 | 48223864  | 48223864  | G | T | G | K | exonic     | OR4X2     | missense | NM_001004727:p.M211I |
| 12820 | 11 | 51292659  | 51292659  | A | T | A | W | intergenic | NA        | NA       | NA                   |
| 12820 | 11 | 55409767  | 55409767  | A | T | A | W | exonic     | SPRYD5    | missense | NM_032681:p.H96L     |
| 12820 | 11 | 58479666  | 58479666  | C | A | C | M | exonic     | GLYATL1   | missense | NM_080661:p.P198T    |
| 12820 | 11 | 59702355  | 59702355  | G | T | G | K | exonic     | MS4A6A    | missense | NM_152851:p.S98Y     |
| 12820 | 11 | 102458742 | 102458742 | C | T | C | Y | exonic     | DCUN1D5   | missense | NM_032299:p.E96K     |
| 12820 | 11 | 117633133 | 117633133 | G | A | G | R | UTR3       | MPZL2     | NA       | NA                   |
| 12820 | 11 | 117633137 | 117633137 | G | A | G | R | UTR3       | MPZL2     | NA       | NA                   |
| 12820 | 11 | 124454272 | 124454272 | G | T | G | K | exonic     | SLC37A2   | silent   | NM_198277:p.L123L    |
| 12820 | 12 | 7143525   | 7143525   | G | T | G | K | intronic   | C1RL      | NA       | NA                   |
| 12820 | 12 | 9686579   | 9686579   | C | T | C | Y | intergenic | NA        | NA       | NA                   |
| 12820 | 12 | 20902843  | 20902843  | T | C | T | Y | intronic   | SLCO1B3   | NA       | NA                   |
| 12820 | 12 | 20925157  | 20925157  | G | T | G | K | exonic     | SLCO1B3   | missense | NM_019844:p.G478V    |

|       |    |           |           |   |   |   |      |             |            |          |                      |
|-------|----|-----------|-----------|---|---|---|------|-------------|------------|----------|----------------------|
| 12820 | 12 | 29601162  | 29601162  | C | T | C | Y    | exonic      | TMTC1      | missense | NM_175861:p.G416E    |
| 12820 | 12 | 39001072  | 39001072  | C | A | C | M    | intronic    | LRRK2      | NA       | NA                   |
| 12820 | 12 | 40786102  | 40786102  | C | A | C | M    | exonic      | GXYLT1     | missense | NM_173601:p.D217Y    |
| 12820 | 12 | 40967655  | 40967655  | C | T | C | Y    | intergenic  | NA         | NA       | NA                   |
| 12820 | 12 | 43743950  | 43743950  | A | T | A | W    | ncRNA       | RACGAP1P   | NA       | NA                   |
| 12820 | 12 | 47698763  | 47698763  | G | A | G | R    | intronic    | PRKAG1     | NA       | NA                   |
| 12820 | 12 | 51501890  | 51501890  | C | G | C | S    | UTR3        | KRT79      | NA       | NA                   |
| 12820 | 12 | 54915666  | 54915666  | C | A | C | M    | exonic      | SLC39A5    | missense | NM_001135195:p.P287Q |
| 12820 | 12 | 63748769  | 63748769  | C | T | C | Y    | intronic    | WIF1       | NA       | NA                   |
| 12820 | 12 | 64143341  | 64143341  | C | T | C | Y    | exonic      | MSRB3      | missense | NM_001031679:p.P177L |
| 12820 | 12 | 77086688  | 77086688  | G | C | G | S    | exonic      | NAV3       | missense | NM_014903:p.R1631T   |
| 12820 | 12 | 117135179 | 117135179 | C | A | C | M    | exonic      | TAOK3      | missense | NM_016281:p.D248Y    |
| 12820 | 12 | 122750235 | 122750235 | A | G | A | R    | exonic      | TCTN2      | missense | NM_024809:p.I513V    |
| 12820 | 12 | 124017475 | 124017475 | C | G | C | S    | intronic    | DHX37      | NA       | NA                   |
| 12820 | 12 | 131176981 | 131176981 | T | C | T | Y    | downstream  | EP400NL    | NA       | NA                   |
| 12820 | 13 | 36398729  | 36398729  | A | T | A | W    | intergenic  | NA         | NA       | NA                   |
| 12820 | 13 | 37043429  | 37043429  | T | A | T | W    | intronic    | POSTN      | NA       | NA                   |
| 12820 | 14 | 19366347  | 19366347  | G | T | G | K    | exonic      | OR4N2      | missense | NM_001004723:p.K300N |
| 12820 | 14 | 23289386  | 23289386  | G | T | G | K    | intergenic  | NA         | NA       | NA                   |
| 12820 | 14 | 23494101  | 23494101  | C | T | C | Y    | exonic      | DHRS4      | missense | NM_021004:p.A49V     |
| 12820 | 14 | 34538505  | 34538505  | T | C | T | Y    | intronic    | SRP54      | NA       | NA                   |
| 12820 | 14 | 38754133  | 38754133  | G | T | G | K    | intergenic  | NA         | NA       | NA                   |
| 12820 | 14 | 41426077  | 41426077  | G | T | G | K    | exonic      | LRFN5      | missense | NM_152447:p.V167F    |
| 12820 | 14 | 41426634  | 41426634  | A | C | A | M    | exonic      | LRFN5      | silent   | NM_152447:p.T352T    |
| 12820 | 14 | 46983171  | 46983171  | G | T | G | K    | intronic    | MDGA2      | NA       | NA                   |
| 12820 | 14 | 49830538  | 49830538  | C | A | C | M    | intronic    | LZHGDH     | NA       | NA                   |
| 12820 | 14 | 50358458  | 50358458  | T | G | T | K    | exonic      | NIN        | missense | NM_016350:p.T23P     |
| 12820 | 14 | 59143754  | 59143754  | A | T | A | W    | splicing    | RTN1       | NA       | NA                   |
| 12820 | 14 | 63522875  | 63522875  | T | C | T | Y    | intronic    | SYNE2      | NA       | NA                   |
| 12820 | 14 | 63589005  | 63589005  | A | T | A | W    | exonic      | SYNE2      | missense | NM_182914:p.H2874L   |
| 12820 | 14 | 65549663  | 65549663  | G | T | G | K    | intergenic  | NA         | NA       | NA                   |
| 12820 | 14 | 72482460  | 72482460  | A | C | A | M    | exonic      | DCAF4      | missense | NM_181340:p.H117P    |
| 12820 | 14 | 74974584  | 74974584  | G | T | G | K    | intronic    | JDP2       | NA       | NA                   |
| 12820 | 14 | 100561949 | 100561949 | G | C | G | S    | upstream;do | MIR329-1   | NA       | NA                   |
| 12820 | 15 | 22978604  | 22978604  | G | T | G | K    | upstream    | SNORD115-7 | NA       | NA                   |
| 12820 | 15 | 71334094  | 71334094  | C | T | C | Y    | exonic      | NEO1       | nonsense | NM_002499:p.Q655X    |
| 12820 | 15 | 76612781  | 76612781  | G | A | G | R    | exonic      | AGPHD1     | missense | NM_001013619:p.S279N |
| 12820 | 15 | 76869051  | 76869051  | G | A | G | R    | intronic    | ADAMT57    | NA       | NA                   |
| 12820 | 15 | 90464749  | 90464749  | A | T | A | W    | exonic      | SLCO3A1    | missense | NM_001145044:p.I354F |
| 12820 | 16 | 2486963   | 2486963   | G | T | G | K    | exonic      | TBC1D24    | silent   | NM_001199107:p.T271T |
| 12820 | 16 | 23620920  | 23620920  | C | - | T | */-C | intronic    | ERN2       | NA       | NA                   |
| 12820 | 16 | 29405906  | 29405906  | T | A | T | W    | intergenic  | NA         | NA       | NA                   |
| 12820 | 16 | 46815708  | 46815708  | T | A | T | W    | exonic      | ABCC11     | missense | NM_032583:p.S177C    |
| 12820 | 16 | 70164111  | 70164111  | G | A | G | R    | intronic    | TAT        | NA       | NA                   |
| 12820 | 16 | 70714424  | 70714424  | C | A | C | M    | intronic    | PMFBP1     | NA       | NA                   |
| 12820 | 16 | 82741448  | 82741448  | G | T | G | K    | splicing    | LRRC50     | missense | NM_178452:p.G118C    |
| 12820 | 17 | 632668    | 632668    | G | A | G | R    | exonic      | RNMTL1     | silent   | NM_018146:p.G100G    |
| 12820 | 17 | 2213567   | 2213567   | G | T | G | K    | exonic      | SGSM2      | missense | NM_014853:p.R244L    |
| 12820 | 17 | 6922086   | 6922086   | G | A | G | R    | exonic      | CLEC10A    | silent   | NM_006344:p.G46G     |
| 12820 | 17 | 7519119   | 7519119   | T | C | T | Y    | exonic      | TP53       | missense | NM_001126117:p.H47R  |
| 12820 | 17 | 7891494   | 7891494   | G | A | G | R    | intronic    | ALOX15B    | NA       | NA                   |
| 12820 | 17 | 7986726   | 7986726   | G | A | G | R    | exonic      | PER1       | silent   | NM_002616:p.S1075S   |
| 12820 | 17 | 10475680  | 10475680  | C | T | C | Y    | exonic      | MYH3       | silent   | NM_002470:p.E1753E   |
| 12820 | 17 | 14080916  | 14080916  | G | T | G | K    | upstream    | CDRT15     | NA       | NA                   |
| 12820 | 17 | 31521436  | 31521436  | A | T | A | W    | exonic      | TBC1D3B    | missense | NM_001001417:p.L198H |
| 12820 | 17 | 36875505  | 36875505  | C | - | T | */-C | intronic    | KRT32      | NA       | NA                   |
| 12820 | 17 | 36913037  | 36913037  | C | T | C | Y    | intronic    | KRT13      | NA       | NA                   |
| 12820 | 17 | 40205810  | 40205810  | C | T | C | Y    | exonic      | ADAM11     | silent   | NM_002390:p.I246I    |
| 12820 | 17 | 45250192  | 45250192  | G | C | G | S    | exonic      | MYST2      | missense | NM_001199158:p.R156S |
| 12820 | 17 | 49255984  | 49255984  | C | A | C | M    | exonic      | KIF2B      | missense | NM_032559:p.H197Q    |
| 12820 | 17 | 53779852  | 53779852  | C | A | C | M    | intronic    | SUPT4H1    | NA       | NA                   |
| 12820 | 17 | 59312102  | 59312102  | G | A | G | R    | intronic    | GH2        | NA       | NA                   |
| 12820 | 17 | 71856283  | 71856283  | G | A | G | R    | intronic    | PRPSAP1    | NA       | NA                   |
| 12820 | 17 | 72712973  | 72712973  | A | T | A | W    | exonic      | SEC14L1    | missense | NM_003003:p.E373D    |
| 12820 | 18 | 99683     | 99683     | A | C | A | M    | ncRNA       | ROCK1P1    | NA       | NA                   |
| 12820 | 18 | 14800050  | 14800050  | A | G | A | R    | intronic    | ANKRD30B   | NA       | NA                   |
| 12820 | 18 | 16771423  | 16771423  | T | C | T | Y    | intergenic  | NA         | NA       | NA                   |
| 12820 | 18 | 21060321  | 21060321  | A | C | A | M    | exonic      | ZNF521     | missense | NM_015461:p.M520R    |
| 12820 | 18 | 28514368  | 28514368  | G | T | G | K    | splicing    | KLHL14     | NA       | NA                   |
| 12820 | 18 | 38808093  | 38808093  | G | A | G | R    | exonic      | RIT2       | nonsense | NM_002930:p.Q60X     |
| 12820 | 18 | 48532383  | 48532383  | G | A | G | R    | intronic    | DCC        | NA       | NA                   |
| 12820 | 19 | 19499853  | 19499853  | C | T | C | Y    | exonic      | NDUFA13    | missense | NM_015965:p.P118L    |
| 12820 | 19 | 20837705  | 20837705  | A | G | A | R    | intergenic  | NA         | NA       | NA                   |
| 12820 | 19 | 22499303  | 22499303  | G | C | G | S    | intergenic  | NA         | NA       | NA                   |
| 12820 | 19 | 23907135  | 23907135  | A | T | A | W    | intergenic  | NA         | NA       | NA                   |
| 12820 | 19 | 38955803  | 38955803  | T | A | T | W    | exonic      | CHST8      | missense | NM_001127895:p.Y424N |
| 12820 | 19 | 41680101  | 41680101  | G | A | G | R    | intergenic  | NA         | NA       | NA                   |
| 12820 | 19 | 44590416  | 44590416  | C | T | C | Y    | exonic      | ZFP36      | missense | NM_003407:p.P73L     |
| 12820 | 19 | 47412944  | 47412944  | T | A | T | W    | exonic      | DEDD2      | missense | NM_133328:p.D19V     |

|       |    |           |           |   |   |   |      |            |          |          |                      |
|-------|----|-----------|-----------|---|---|---|------|------------|----------|----------|----------------------|
| 12820 | 19 | 49228281  | 49228281  | A | T | A | W    | exonic     | ZNF222   | missense | NM_013360:p.Q205L    |
| 12820 | 19 | 52536000  | 52536000  | G | A | G | R    | exonic     | GPR77    | missense | NM_018485:p.R35H     |
| 12820 | 19 | 52688201  | 52688201  | C | T | C | Y    | exonic     | NAPA     | missense | NM_003827:p.E155K    |
| 12820 | 19 | 53614677  | 53614677  | A | G | A | R    | exonic     | GRIN2D   | missense | NM_000836:p.I629V    |
| 12820 | 19 | 57561345  | 57561345  | C | T | C | Y    | exonic     | ZNF610   | missense | NM_173530:p.S301L    |
| 12820 | 19 | 58359937  | 58359937  | T | A | T | W    | exonic     | ZNF665   | nonsense | NM_024733:p.K540X    |
| 12820 | 19 | 58650422  | 58650422  | A | G | A | R    | exonic     | ZNF761   | missense | NM_001008401:p.I284V |
| 12820 | 19 | 59253342  | 59253342  | T | A | T | W    | intronic   | VSTM1    | NA       | NA                   |
| 12820 | 19 | 59939563  | 59939563  | C | A | C | M    | UTR3       | KIR3DL3  | NA       | NA                   |
| 12820 | 19 | 60144146  | 60144146  | C | A | C | M    | exonic     | NLRP7    | missense | NM_206828:p.G106V    |
| 12820 | 19 | 63137088  | 63137088  | G | A | G | R    | intronic   | ZNF418   | NA       | NA                   |
| 12820 | 20 | 23914302  | 23914302  | A | T | A | W    | splicing   | GGTLC1   | NA       | NA                   |
| 12820 | 20 | 28221531  | 28221531  | C | T | C | Y    | intergenic | NA       | NA       | NA                   |
| 12820 | 20 | 40169058  | 40169058  | C | A | C | M    | intronic   | PTPRT    | NA       | NA                   |
| 12820 | 20 | 43604175  | 43604175  | C | A | C | M    | UTR3       | SPINLW1  | NA       | NA                   |
| 12820 | 20 | 48007954  | 48007954  | A | T | A | W    | intergenic | NA       | NA       | NA                   |
| 12820 | 21 | 10121988  | 10121988  | T | A | T | W    | intergenic | NA       | NA       | NA                   |
| 12820 | 21 | 35343083  | 35343083  | T | C | T | Y    | UTR5       | RUNX1    | NA       | NA                   |
| 12820 | 22 | 14785879  | 14785879  | A | T | A | W    | intergenic | NA       | NA       | NA                   |
| 12820 | 22 | 23228113  | 23228113  | G | A | G | R    | exonic     | UPB1     | missense | NM_016327:p.R99H     |
| 12820 | 22 | 30564620  | 30564620  | G | T | G | K    | intronic   | DEPDC5   | NA       | NA                   |
| 12820 | 22 | 31161697  | 31161697  | G | A | G | R    | exonic     | BPIL2    | silent   | NM_174932:p.T306T    |
| 12820 | 22 | 31168615  | 31168615  | G | A | G | R    | intronic   | BPIL2    | NA       | NA                   |
| 12820 | 22 | 36604004  | 36604004  | G | A | G | R    | exonic     | EIF3L    | silent   | NM_016091:p.E485E    |
| 12820 | 22 | 49024298  | 49024298  | C | A | C | M    | exonic     | TUBGCP6  | missense | NM_020461:p.D240Y    |
| 12820 | X  | 8960574   | 8960574   | G | A | G | R    | intronic   | FAM9B    | NA       | NA                   |
| 12820 | X  | 12754156  | 12754156  | C | A | C | M    | intergenic | NA       | NA       | NA                   |
| 12820 | X  | 31764816  | 31764816  | T | C | T | Y    | exonic     | DMD      | silent   | NM_004007:p.E2257E   |
| 12820 | X  | 49317762  | 49317762  | G | A | G | R    | intergenic | NA       | NA       | NA                   |
| 12820 | X  | 54337998  | 54337998  | G | T | G | K    | exonic     | WNK3     | missense | NM_020922:p.S469Y    |
| 12820 | X  | 65741067  | 65741067  | G | C | G | S    | exonic     | EDA2R    | nonsense | NM_021783:p.Y91X     |
| 12820 | X  | 78313958  | 78313958  | C | T | C | Y    | exonic     | GPR174   | silent   | NM_032553:p.A266A    |
| 12820 | X  | 78503690  | 78503690  | G | C | G | S    | intronic   | ITM2A    | NA       | NA                   |
| 12820 | X  | 85954789  | 85954789  | G | T | G | K    | splicing   | DACH2    | missense | NM_001139515:p.G297C |
| 12820 | X  | 90977700  | 90977700  | G | T | G | K    | splicing   | PCDH11X  | NA       | NA                   |
| 12820 | X  | 91020338  | 91020338  | - | T | G | */+T | exonic     | PCDH11X  | FS_ins   | NM_032969:p.V815fs   |
| 12820 | X  | 110442549 | 110442549 | G | T | G | K    | exonic     | DCX      | missense | NM_001195553:p.P340T |
| 12820 | X  | 132715874 | 132715874 | A | - | T | */-A | intronic   | GPC3     | NA       | NA                   |
| 12820 | X  | 134141946 | 134141946 | C | T | C | Y    | intergenic | NA       | NA       | NA                   |
| 12820 | X  | 142424567 | 142424567 | G | T | G | K    | exonic     | SPANXN3  | missense | NM_001009609:p.L57I  |
| 12820 | X  | 142794905 | 142794905 | C | A | C | M    | exonic     | UBE2NL   | missense | NM_001012989:p.Q13K  |
| 12820 | Y  | 11752752  | 11752752  | G | T | G | K    | intergenic | NA       | NA       | NA                   |
| 12820 | Y  | 11772729  | 11772729  | C | T | C | Y    | intergenic | NA       | NA       | NA                   |
| 12820 | Y  | 11775154  | 11775154  | G | A | G | R    | intergenic | NA       | NA       | NA                   |
| 12820 | M  | 396       | 396       | C | T | C | Y    | intergenic | NA       | NA       | NA                   |
| 12862 | 1  | 2619068   | 2619068   | C | A | C | M    | intergenic | NA       | NA       | NA                   |
| 12862 | 2  | 161843420 | 161843420 | C | T | C | Y    | intergenic | NA       | NA       | NA                   |
| 12862 | 9  | 67910418  | 67910418  | A | T | A | W    | intergenic | NA       | NA       | NA                   |
| 12862 | 10 | 127570858 | 127570858 | G | A | G | R    | intergenic | NA       | NA       | NA                   |
| 12862 | 11 | 118391204 | 118391204 | A | T | A | W    | intronic   | CCDC84   | NA       | NA                   |
| 12862 | 15 | 19401842  | 19401842  | T | G | T | K    | intergenic | NA       | NA       | NA                   |
| 12862 | 16 | 34351212  | 34351212  | A | G | A | R    | intergenic | NA       | NA       | NA                   |
| 12862 | 17 | 28173919  | 28173919  | T | G | T | K    | intronic   | MYO1D    | NA       | NA                   |
| 12862 | 19 | 49655064  | 49655064  | T | C | T | Y    | intergenic | NA       | NA       | NA                   |
| 12862 | 21 | 9732808   | 9732808   | T | G | T | K    | intergenic | NA       | NA       | NA                   |
| 12862 | Y  | 11773487  | 11773487  | G | A | G | R    | intergenic | NA       | NA       | NA                   |
| 12924 | 1  | 13590934  | 13590934  | C | A | C | M    | intronic   | PRAMEF17 | NA       | NA                   |
| 12924 | 1  | 13590935  | 13590935  | C | A | C | M    | intronic   | PRAMEF17 | NA       | NA                   |
| 12924 | 1  | 16806437  | 16806437  | C | T | C | Y    | UTR5       | NBPF1    | NA       | NA                   |
| 12924 | 1  | 19311641  | 19311641  | C | A | C | M    | exonic     | UBR4     | missense | NM_020765:p.R3922L   |
| 12924 | 1  | 22075318  | 22075318  | C | A | C | M    | exonic     | HSPG2    | silent   | NM_005529:p.L998L    |
| 12924 | 1  | 28665439  | 28665439  | A | G | A | R    | intronic   | PHACTR4  | NA       | NA                   |
| 12924 | 1  | 32659958  | 32659958  | T | A | T | W    | intergenic | NA       | NA       | NA                   |
| 12924 | 1  | 33843582  | 33843582  | C | G | C | S    | exonic     | CSMD2    | missense | NM_052896:p.G2142A   |
| 12924 | 1  | 33962308  | 33962308  | A | T | A | W    | intronic   | CSMD2    | NA       | NA                   |
| 12924 | 1  | 36698961  | 36698961  | C | G | C | S    | exonic     | MRPS15   | missense | NM_031280:p.E102Q    |
| 12924 | 1  | 39679531  | 39679531  | G | C | G | S    | exonic     | MACF1    | missense | NM_033044:p.E4650Q   |
| 12924 | 1  | 42730177  | 42730177  | A | T | A | W    | intergenic | NA       | NA       | NA                   |
| 12924 | 1  | 43680666  | 43680666  | C | T | C | Y    | intronic   | KIAA0467 | NA       | NA                   |
| 12924 | 1  | 55461216  | 55461216  | A | T | A | W    | intergenic | NA       | NA       | NA                   |
| 12924 | 1  | 67076055  | 67076055  | C | A | C | M    | exonic     | WDR78    | missense | NM_024763:p.V503F    |
| 12924 | 1  | 67210044  | 67210044  | G | A | G | R    | intronic   | MIER1    | NA       | NA                   |
| 12924 | 1  | 74421756  | 74421756  | T | A | T | W    | exonic     | LRRIQ3   | silent   | NM_001105659:p.P67P  |
| 12924 | 1  | 81740912  | 81740912  | C | G | C | S    | intergenic | NA       | NA       | NA                   |
| 12924 | 1  | 84650642  | 84650642  | C | A | C | M    | exonic     | DNASE2B  | missense | NM_021233:p.N190K    |
| 12924 | 1  | 86019473  | 86019473  | G | T | G | K    | intronic   | COL24A1  | NA       | NA                   |
| 12924 | 1  | 103222316 | 103222316 | C | A | C | M    | exonic     | COL11A1  | missense | NM_001854:p.G841V    |
| 12924 | 1  | 103961885 | 103961885 | G | T | G | K    | intronic   | AMY2A    | NA       | NA                   |
| 12924 | 1  | 107669038 | 107669038 | C | G | C | S    | exonic     | NTNG1    | nonsense | NM_001113228:p.Y286X |

|       |   |           |           |   |    |   |       |            |           |          |                      |
|-------|---|-----------|-----------|---|----|---|-------|------------|-----------|----------|----------------------|
| 12924 | 1 | 108109266 | 108109266 | T | C  | T | Y     | exonic     | VAV3      | silent   | NM_006113:p.L292L    |
| 12924 | 1 | 110061543 | 110061543 | G | T  | G | K     | exonic     | GSTM5     | missense | NM_000851:p.G210V    |
| 12924 | 1 | 141477101 | 141477101 | T | G  | T | K     | intergenic | NA        | NA       | NA                   |
| 12924 | 1 | 144500231 | 144500231 | C | T  | C | Y     | intronic   | GPR89A    | NA       | NA                   |
| 12924 | 1 | 150547961 | 150547961 | G | T  | G | K     | exonic     | FLG       | missense | NM_002016:p.H2009N   |
| 12924 | 1 | 151853959 | 151853959 | C | -  | A | */-C  | UTR3       | S100A14   | NA       | NA                   |
| 12924 | 1 | 152490169 | 152490169 | G | T  | G | K     | exonic     | UBAP2L    | silent   | NM_001127320:p.V414V |
| 12924 | 1 | 153469968 | 153469968 | G | C  | G | S     | downstream | GBA       | NA       | NA                   |
| 12924 | 1 | 154146938 | 154146938 | - | TT | A | */+TT | intronic   | RIT1      | NA       | NA                   |
| 12924 | 1 | 154399315 | 154399315 | G | A  | G | R     | intronic   | SEMA4A    | NA       | NA                   |
| 12924 | 1 | 154561628 | 154561628 | C | A  | C | M     | intronic   | CCT3      | NA       | NA                   |
| 12924 | 1 | 156491328 | 156491328 | C | T  | C | Y     | intronic   | CD1A      | NA       | NA                   |
| 12924 | 1 | 156656302 | 156656302 | A | T  | A | W     | downstream | OR10K2    | NA       | NA                   |
| 12924 | 1 | 157676292 | 157676292 | C | A  | C | M     | exonic     | OR10J1    | silent   | NM_012351:p.G40G     |
| 12924 | 1 | 167842839 | 167842839 | G | T  | G | K     | exonic     | SELP      | missense | NM_003005:p.N497K    |
| 12924 | 1 | 169514628 | 169514628 | G | A  | G | R     | exonic     | FMO1      | silent   | NM_002021:p.A207A    |
| 12924 | 1 | 169919748 | 169919748 | G | T  | G | K     | intergenic | NA        | NA       | NA                   |
| 12924 | 1 | 173281304 | 173281304 | G | T  | G | K     | intergenic | NA        | NA       | NA                   |
| 12924 | 1 | 188333768 | 188333768 | T | C  | T | Y     | UTR3       | FAM5C     | NA       | NA                   |
| 12924 | 1 | 194562683 | 194562683 | C | A  | C | M     | intronic   | KCNT2     | NA       | NA                   |
| 12924 | 1 | 195458738 | 195458738 | A | C  | A | M     | intergenic | NA        | NA       | NA                   |
| 12924 | 1 | 199222821 | 199222821 | G | T  | G | K     | exonic     | KIF21B    | silent   | NM_017596:p.G1180G   |
| 12924 | 1 | 199461546 | 199461546 | G | C  | G | S     | intronic   | IGFN1     | NA       | NA                   |
| 12924 | 1 | 201406901 | 201406901 | T | A  | T | W     | exonic     | MYBPH     | missense | NM_004997:p.N282Y    |
| 12924 | 1 | 201719142 | 201719142 | C | G  | C | S     | exonic     | PRELP     | missense | NM_201348:p.I69M     |
| 12924 | 1 | 202402011 | 202402011 | G | T  | G | K     | exonic     | REN       | missense | NM_000537:p.L12M     |
| 12924 | 1 | 202663963 | 202663963 | C | A  | C | M     | exonic     | PIK3C2B   | missense | NM_002646:p.L1469F   |
| 12924 | 1 | 202854551 | 202854551 | G | T  | G | K     | exonic     | LRRN2     | missense | NM_006338:p.A398E    |
| 12924 | 1 | 206138934 | 206138934 | C | T  | C | Y     | intronic   | CD34      | NA       | NA                   |
| 12924 | 1 | 210275296 | 210275296 | C | G  | C | S     | intronic   | INTS7     | NA       | NA                   |
| 12924 | 1 | 218901829 | 218901829 | A | T  | A | W     | exonic     | MARK1     | nonsense | NM_018650:p.K696X    |
| 12924 | 1 | 226712213 | 226712213 | C | A  | C | M     | upstream   | HIST3H2A  | NA       | NA                   |
| 12924 | 1 | 227652965 | 227652965 | C | G  | C | S     | exonic     | NUP133    | missense | NM_018230:p.C1037S   |
| 12924 | 1 | 238242972 | 238242972 | C | T  | C | Y     | intergenic | NA        | NA       | NA                   |
| 12924 | 1 | 238559029 | 238559029 | G | T  | G | K     | exonic     | FMN2      | nonsense | NM_020066:p.E1416X   |
| 12924 | 1 | 239098758 | 239098758 | C | A  | C | M     | exonic     | RGS7      | silent   | NM_002924:p.L156L    |
| 12924 | 1 | 240223446 | 240223446 | C | G  | C | S     | intergenic | NA        | NA       | NA                   |
| 12924 | 1 | 240343726 | 240343726 | C | A  | C | M     | intronic   | PLD5      | NA       | NA                   |
| 12924 | 1 | 245721475 | 245721475 | C | A  | C | M     | exonic     | OR2W5     | nonsense | NM_001004698:p.C141X |
| 12924 | 1 | 245721476 | 245721476 | C | G  | C | S     | exonic     | OR2W5     | missense | NM_001004698:p.L142V |
| 12924 | 1 | 245902100 | 245902100 | G | T  | G | K     | exonic     | OR13G1    | missense | NM_001005487:p.F289L |
| 12924 | 1 | 245988273 | 245988273 | G | C  | G | S     | exonic     | OR1C1     | nonsense | NM_012353:p.S20X     |
| 12924 | 1 | 246126121 | 246126121 | G | T  | G | K     | exonic     | OR2W3     | missense | NM_001001957:p.V204L |
| 12924 | 1 | 246352120 | 246352120 | C | A  | C | M     | ncRNA      | OR2M1P    | NA       | NA                   |
| 12924 | 1 | 246636988 | 246636988 | G | T  | G | K     | exonic     | OR2T1     | missense | NM_030904:p.R357M    |
| 12924 | 1 | 246636989 | 246636989 | G | T  | G | K     | exonic     | OR2T1     | missense | NM_030904:p.R357S    |
| 12924 | 1 | 246822802 | 246822802 | G | T  | G | K     | exonic     | OR2T10    | silent   | NM_001004693:p.V297V |
| 12924 | 2 | 15365868  | 15365868  | C | A  | C | M     | exonic     | NBAS      | missense | NM_015909:p.A1574S   |
| 12924 | 2 | 15365869  | 15365869  | C | A  | C | M     | exonic     | NBAS      | silent   | NM_015909:p.L1573L   |
| 12924 | 2 | 15437187  | 15437187  | C | A  | C | M     | exonic     | NBAS      | missense | NM_015909:p.D1194Y   |
| 12924 | 2 | 15437394  | 15437394  | T | G  | T | K     | exonic     | NBAS      | missense | NM_015909:p.S1125R   |
| 12924 | 2 | 26104615  | 26104615  | G | T  | G | K     | intergenic | NA        | NA       | NA                   |
| 12924 | 2 | 37188244  | 37188244  | G | T  | G | K     | intronic   | EIF2AK2   | NA       | NA                   |
| 12924 | 2 | 44282638  | 44282638  | G | A  | G | R     | exonic     | PPM1B     | missense | NM_001033557:p.D266N |
| 12924 | 2 | 48541840  | 48541840  | C | T  | C | Y     | exonic     | KLRAQ1    | missense | NM_152994:p.S220L    |
| 12924 | 2 | 49049306  | 49049306  | G | T  | G | K     | intronic   | FSHR      | NA       | NA                   |
| 12924 | 2 | 53978955  | 53978955  | C | A  | C | M     | exonic     | PSME4     | nonsense | NM_014614:p.E1155X   |
| 12924 | 2 | 64650382  | 64650382  | A | T  | A | W     | intronic   | AFTPH     | NA       | NA                   |
| 12924 | 2 | 71045120  | 71045120  | G | A  | G | R     | exonic     | ATP6V1B1  | missense | NM_001692:p.M396I    |
| 12924 | 2 | 86938803  | 86938803  | G | T  | G | K     | exonic     | CD8B      | missense | NM_172213:p.S97R     |
| 12924 | 2 | 90963128  | 90963128  | A | C  | A | M     | intergenic | NA        | NA       | NA                   |
| 12924 | 2 | 115942761 | 115942761 | C | G  | C | S     | intronic   | DPP10     | NA       | NA                   |
| 12924 | 2 | 119445600 | 119445600 | C | T  | C | Y     | intronic   | MARCO     | NA       | NA                   |
| 12924 | 2 | 120085710 | 120085710 | A | G  | A | R     | exonic     | PCDP1     | silent   | NM_001029996:p.G125G |
| 12924 | 2 | 120394371 | 120394371 | C | A  | C | M     | intronic   | PTPN4     | NA       | NA                   |
| 12924 | 2 | 127900247 | 127900247 | A | T  | A | W     | exonic     | PROC      | missense | NM_000312:p.T218S    |
| 12924 | 2 | 128196992 | 128196992 | C | T  | C | Y     | intronic   | WDR33     | NA       | NA                   |
| 12924 | 2 | 131917389 | 131917389 | C | T  | C | Y     | ncRNA      | LOC401010 | NA       | NA                   |
| 12924 | 2 | 132762012 | 132762012 | C | T  | C | Y     | intergenic | NA        | NA       | NA                   |
| 12924 | 2 | 136291413 | 136291413 | C | T  | C | Y     | exonic     | LCT       | missense | NM_002299:p.G559S    |
| 12924 | 2 | 161846523 | 161846523 | C | G  | C | S     | intergenic | NA        | NA       | NA                   |
| 12924 | 2 | 162067176 | 162067176 | T | C  | T | Y     | intergenic | NA        | NA       | NA                   |
| 12924 | 2 | 165692685 | 165692685 | C | A  | C | M     | exonic     | SCN3A     | missense | NM_001081676:p.R983I |
| 12924 | 2 | 165694683 | 165694683 | A | G  | A | R     | intronic   | SCN3A     | NA       | NA                   |
| 12924 | 2 | 166508130 | 166508130 | T | A  | T | W     | intronic   | TTC21B    | NA       | NA                   |
| 12924 | 2 | 167812135 | 167812135 | C | A  | C | M     | exonic     | XIRP2     | missense | NM_152381:p.T1996N   |
| 12924 | 2 | 172530142 | 172530142 | C | A  | C | M     | exonic     | HAT1      | missense | NM_003642:p.P116Q    |
| 12924 | 2 | 173040504 | 173040504 | C | A  | C | M     | exonic     | ITGA6     | silent   | NM_001079818:p.V119V |
| 12924 | 2 | 173040550 | 173040550 | C | T  | C | Y     | intronic   | ITGA6     | NA       | NA                   |

|       |   |           |           |   |   |   |      |            |         |          |                         |
|-------|---|-----------|-----------|---|---|---|------|------------|---------|----------|-------------------------|
| 12924 | 2 | 182251148 | 182251148 | G | A | G | R    | exonic     | NEUROD1 | missense | NM_002500:p.P229S       |
| 12924 | 2 | 182720125 | 182720125 | C | A | C | M    | splicing   | PDE1A   | NA       | NA                      |
| 12924 | 2 | 182761933 | 182761933 | A | G | A | R    | intronic   | PDE1A   | NA       | NA                      |
| 12924 | 2 | 185511661 | 185511661 | T | C | T | Y    | exonic     | ZNF804A | missense | NM_194250:p.I1098T      |
| 12924 | 2 | 190503648 | 190503648 | A | T | A | W    | intergenic | NA      | NA       | NA                      |
| 12924 | 2 | 196573891 | 196573891 | T | A | T | W    | intronic   | DNAH7   | NA       | NA                      |
| 12924 | 2 | 201172637 | 201172637 | G | T | G | K    | exonic     | AOX1    | missense | NM_001159:p.G120V       |
| 12924 | 2 | 201980520 | 201980520 | A | T | A | W    | exonic     | TRAK2   | missense | NM_015049:p.L46Q        |
| 12924 | 2 | 204509717 | 204509717 | G | T | G | K    | UTR5       | ICOS    | NA       | NA                      |
| 12924 | 2 | 210871417 | 210871417 | C | G | C | S    | exonic     | MYL1    | missense | NM_079422:p.R48S        |
| 12924 | 2 | 216001148 | 216001148 | C | G | C | S    | splicing   | FN1     | missense | NM_054034:p.G282R       |
| 12924 | 2 | 222535978 | 222535978 | G | T | G | K    | intergenic | NA      | NA       | NA                      |
| 12924 | 2 | 224170490 | 224170490 | C | A | C | M    | exonic     | SCG2    | missense | NM_003469:p.M58S1       |
| 12924 | 2 | 227651084 | 227651084 | T | A | T | W    | intronic   | COL4A4  | NA       | NA                      |
| 12924 | 2 | 239701741 | 239701741 | C | G | C | S    | exonic     | HDAC4   | missense | NM_006037:p.R574P       |
| 12924 | 2 | 239701742 | 239701742 | G | T | G | K    | exonic     | HDAC4   | silent   | NM_006037:p.R574R       |
| 12924 | 2 | 241788367 | 241788367 | G | A | G | R    | intronic   | ANO7    | NA       | NA                      |
| 12924 | 3 | 2917527   | 2917527   | G | T | G | K    | intronic   | CNTN4   | NA       | NA                      |
| 12924 | 3 | 15495935  | 15495935  | C | T | C | Y    | intronic   | COLQ    | NA       | NA                      |
| 12924 | 3 | 16615067  | 16615067  | C | A | C | M    | exonic     | DAZL    | nonsense | NM_001190811:p.E36X     |
| 12924 | 3 | 27022147  | 27022147  | A | T | A | W    | intergenic | NA      | NA       | NA                      |
| 12924 | 3 | 42702544  | 42702544  | G | T | G | K    | exonic     | KBTBD5  | missense | NM_152393:p.D144Y       |
| 12924 | 3 | 43364914  | 43364914  | G | A | G | R    | exonic     | SNRK    | missense | NM_017719:p.R720Q       |
| 12924 | 3 | 46038131  | 46038131  | G | T | G | K    | exonic     | XCR1    | missense | NM_005283:p.L10S1       |
| 12924 | 3 | 46374872  | 46374872  | G | T | G | K    | exonic     | CCR2    | missense | NM_001123041:p.D284Y    |
| 12924 | 3 | 47887307  | 47887307  | C | G | C | S    | splicing   | MAP4    | silent   | NM_002375:p.R953R       |
| 12924 | 3 | 51969965  | 51969965  | T | G | T | K    | intronic   | PCBP4   | NA       | NA                      |
| 12924 | 3 | 56602207  | 56602207  | A | T | A | W    | intronic   | CCDC66  | NA       | NA                      |
| 12924 | 3 | 58343344  | 58343344  | A | T | A | W    | exonic     | PXK     | missense | NM_017771:p.I89L        |
| 12924 | 3 | 65408699  | 65408699  | C | A | C | M    | intronic   | MAGI1   | NA       | NA                      |
| 12924 | 3 | 90366282  | 90366282  | G | T | G | K    | intergenic | NA      | NA       | NA                      |
| 12924 | 3 | 110236765 | 110236765 | G | T | G | K    | intronic   | MORC1   | NA       | NA                      |
| 12924 | 3 | 112313692 | 112313692 | G | T | G | K    | exonic     | PVRL3   | missense | NM_015480:p.G96C        |
| 12924 | 3 | 113314450 | 113314450 | G | T | G | K    | intronic   | C3orf52 | NA       | NA                      |
| 12924 | 3 | 113700766 | 113700766 | C | A | C | M    | intronic   | BTLA    | NA       | NA                      |
| 12924 | 3 | 113899247 | 113899247 | A | C | A | M    | intergenic | NA      | NA       | NA                      |
| 12924 | 3 | 113899248 | 113899248 | G | T | G | K    | intergenic | NA      | NA       | NA                      |
| 12924 | 3 | 122788154 | 122788154 | T | C | T | Y    | UTR3       | ARGFX   | NA       | NA                      |
| 12924 | 3 | 122898003 | 122898003 | T | A | T | W    | exonic     | GOLGB1  | nonsense | NM_004487:p.K1348X      |
| 12924 | 3 | 128781418 | 128781418 | C | A | C | M    | intronic   | TPRA1   | NA       | NA                      |
| 12924 | 3 | 133445462 | 133445462 | G | A | G | R    | intergenic | NA      | NA       | NA                      |
| 12924 | 3 | 137528753 | 137528753 | C | A | C | M    | exonic     | PCCB    | missense | NM_000532:p.A422E       |
| 12924 | 3 | 149367478 | 149367478 | C | A | C | M    | intergenic | NA      | NA       | NA                      |
| 12924 | 3 | 149367479 | 149367479 | C | A | C | M    | intergenic | NA      | NA       | NA                      |
| 12924 | 3 | 149367621 | 149367621 | G | A | G | R    | intergenic | NA      | NA       | NA                      |
| 12924 | 3 | 155553770 | 155553770 | G | A | G | R    | intronic   | GPR149  | NA       | NA                      |
| 12924 | 3 | 156317039 | 156317039 | G | T | G | K    | exonic     | MME     | nonsense | NM_007288:p.E146X       |
| 12924 | 3 | 157343737 | 157343737 | C | A | C | M    | exonic     | KCNAB1  | missense | NM_003471:p.L26I        |
| 12924 | 3 | 157622019 | 157622019 | T | A | T | W    | intronic   | KCNAB1  | NA       | NA                      |
| 12924 | 3 | 166191937 | 166191937 | C | T | C | Y    | exonic     | SI      | missense | NM_001041:p.G1669E      |
| 12924 | 3 | 180805128 | 180805128 | C | - | A | */-C | UTR5       | MRPL47  | NA       | NA                      |
| 12924 | 3 | 181524526 | 181524526 | C | T | C | Y    | intergenic | NA      | NA       | NA                      |
| 12924 | 3 | 187388638 | 187388638 | T | A | T | W    | intronic   | DGKG    | NA       | NA                      |
| 12924 | 3 | 187480284 | 187480284 | C | A | C | M    | intronic   | DGKG    | NA       | NA                      |
| 12924 | 3 | 187852781 | 187852781 | C | A | C | M    | exonic     | FETUB   | missense | NM_014375:p.N272K       |
| 12924 | 3 | 198723629 | 198723629 | C | G | C | S    | exonic     | BDH1    | missense | NM_203315:p.R189P       |
| 12924 | 4 | 653890    | 653890    | C | A | C | M    | exonic     | PDE6B   | silent   | NM_000283:p.I853I       |
| 12924 | 4 | 2102702   | 2102702   | C | A | C | M    | intronic   | POLN    | NA       | NA                      |
| 12924 | 4 | 2102703   | 2102703   | C | A | C | M    | intronic   | POLN    | NA       | NA                      |
| 12924 | 4 | 32689002  | 32689002  | G | T | G | K    | intergenic | NA      | NA       | NA                      |
| 12924 | 4 | 40046028  | 40046028  | C | - | T | */-C | exonic     | CHRNA9  | FS_del   | NM_017581:c.738_738delC |
| 12924 | 4 | 45755269  | 45755269  | G | T | G | K    | exonic     | GABRG1  | missense | NM_173536:p.H251Q       |
| 12924 | 4 | 48286387  | 48286387  | G | C | G | S    | intronic   | FRYL    | NA       | NA                      |
| 12924 | 4 | 48331121  | 48331121  | C | A | C | M    | exonic     | FRYL    | missense | NM_015030:p.A22S        |
| 12924 | 4 | 55665621  | 55665621  | G | A | G | R    | exonic     | KDR     | nonsense | NM_002253:p.Q645X       |
| 12924 | 4 | 57154714  | 57154714  | C | T | C | Y    | intergenic | NA      | NA       | NA                      |
| 12924 | 4 | 57209659  | 57209659  | C | A | C | M    | exonic     | HOPX    | missense | NM_032495:p.R87I        |
| 12924 | 4 | 71145095  | 71145095  | T | A | T | W    | UTR5       | CSN3    | NA       | NA                      |
| 12924 | 4 | 77485661  | 77485661  | C | A | C | M    | intronic   | CCDC158 | NA       | NA                      |
| 12924 | 4 | 106578638 | 106578638 | C | A | C | M    | exonic     | PPA2    | missense | NM_176869:p.W149L       |
| 12924 | 4 | 110061162 | 110061162 | A | G | A | R    | intronic   | COL25A1 | NA       | NA                      |
| 12924 | 4 | 126592756 | 126592756 | G | T | G | K    | exonic     | FAT4    | missense | NM_024582:p.S3712I      |
| 12924 | 4 | 140528680 | 140528680 | G | A | G | R    | exonic     | NAA15   | missense | NM_057175:p.E865K       |
| 12924 | 4 | 145848821 | 145848821 | C | A | C | M    | exonic     | HHIP    | missense | NM_022475:p.N403K       |
| 12924 | 4 | 153785128 | 153785128 | T | C | T | Y    | intronic   | TMEM154 | NA       | NA                      |
| 12924 | 4 | 154011374 | 154011374 | G | A | G | R    | exonic     | ARFIP1  | silent   | NM_001025595:p.L74L     |
| 12924 | 4 | 155939392 | 155939392 | C | T | C | Y    | exonic     | RBM46   | nonsense | NM_144979:p.Q210X       |
| 12924 | 4 | 164274067 | 164274067 | C | A | C | M    | intronic   | NAF1    | NA       | NA                      |
| 12924 | 4 | 164613809 | 164613809 | C | G | C | S    | exonic     | TKTL2   | missense | NM_032136:p.L176F       |

|       |   |           |           |        |   |   |           |            |          |          |                        |
|-------|---|-----------|-----------|--------|---|---|-----------|------------|----------|----------|------------------------|
| 12924 | 4 | 166061112 | 166061112 | T      | A | T | W         | intergenic | NA       | NA       | NA                     |
| 12924 | 4 | 167135773 | 167135773 | C      | T | C | Y         | exonic     | TLL1     | missense | NM_012464:p.P209S      |
| 12924 | 4 | 176809946 | 176809946 | G      | T | G | K         | intronic   | GPM6A    | NA       | NA                     |
| 12924 | 4 | 177286942 | 177286942 | C      | G | C | S         | exonic     | WDR17    | missense | NM_181265:p.L284V      |
| 12924 | 4 | 182680966 | 182680966 | A      | G | A | R         | intergenic | NA       | NA       | NA                     |
| 12924 | 4 | 191199935 | 191199935 | G      | A | G | R         | intergenic | NA       | NA       | NA                     |
| 12924 | 5 | 5253438   | 5253438   | C      | A | C | M         | intronic   | ADAMTS16 | NA       | NA                     |
| 12924 | 5 | 10717763  | 10717763  | G      | T | G | K         | intergenic | NA       | NA       | NA                     |
| 12924 | 5 | 23724870  | 23724870  | C      | G | C | S         | intergenic | NA       | NA       | NA                     |
| 12924 | 5 | 24206573  | 24206573  | C      | A | C | M         | intergenic | NA       | NA       | NA                     |
| 12924 | 5 | 24523857  | 24523857  | G      | C | G | S         | exonic     | CDH10    | missense | NM_001190450:p.A250G   |
| 12924 | 5 | 29884560  | 29884560  | C      | A | C | M         | intergenic | NA       | NA       | NA                     |
| 12924 | 5 | 32258061  | 32258061  | C      | A | C | M         | intergenic | NA       | NA       | NA                     |
| 12924 | 5 | 33596842  | 33596842  | T      | C | T | Y         | intronic   | ADAMTS12 | NA       | NA                     |
| 12924 | 5 | 40816511  | 40816511  | C      | A | C | M         | intronic   | PRKAA1   | NA       | NA                     |
| 12924 | 5 | 40816512  | 40816512  | C      | A | C | M         | intronic   | PRKAA1   | NA       | NA                     |
| 12924 | 5 | 41231612  | 41231612  | T      | C | T | Y         | intronic   | C6       | NA       | NA                     |
| 12924 | 5 | 45298623  | 45298623  | G      | T | G | K         | exonic     | HCN1     | missense | NM_021072:p.N610K      |
| 12924 | 5 | 50164423  | 50164423  | G      | T | G | K         | exonic     | PARP8    | missense | NM_001178056:p.S720I   |
| 12924 | 5 | 58156870  | 58156870  | G      | T | G | K         | intronic   | RAB3C    | NA       | NA                     |
| 12924 | 5 | 67625011  | 67625021  | CAGTAT | - | T | *-/       | exonic     | PIK3R1   | FS_del   | NM_181504:c.433_443del |
|       |   |           |           | AATCC  |   |   | CAGTATAAT |            |          |          |                        |
|       |   |           |           |        |   |   | CC        |            |          |          |                        |
| 12924 | 5 | 96126798  | 96126798  | A      | G | A | R         | intronic   | CAST     | NA       | NA                     |
| 12924 | 5 | 101821994 | 101821994 | A      | T | A | W         | exonic     | SLCO6A1  | silent   | NM_173488:p.A374A      |
| 12924 | 5 | 107089546 | 107089546 | G      | A | G | R         | intergenic | NA       | NA       | NA                     |
| 12924 | 5 | 107089547 | 107089547 | G      | T | G | K         | intergenic | NA       | NA       | NA                     |
| 12924 | 5 | 110519547 | 110519547 | C      | A | C | M         | intergenic | NA       | NA       | NA                     |
| 12924 | 5 | 110519548 | 110519548 | C      | A | C | M         | intergenic | NA       | NA       | NA                     |
| 12924 | 5 | 112139224 | 112139224 | G      | T | G | K         | splicing   | APC      | NA       | NA                     |
| 12924 | 5 | 112139225 | 112139225 | G      | T | G | K         | splicing   | APC      | missense | NM_000038:p.R141S      |
| 12924 | 5 | 121035275 | 121035275 | C      | A | C | M         | intergenic | NA       | NA       | NA                     |
| 12924 | 5 | 126760120 | 126760120 | C      | A | C | M         | intronic   | MEGF10   | NA       | NA                     |
| 12924 | 5 | 126875253 | 126875253 | C      | G | C | S         | intergenic | NA       | NA       | NA                     |
| 12924 | 5 | 129011536 | 129011536 | T      | A | T | W         | intronic   | ADAMTS19 | NA       | NA                     |
| 12924 | 5 | 140461183 | 140461183 | C      | T | C | Y         | exonic     | PCDHB3   | missense | NM_018937:p.P256S      |
| 12924 | 5 | 140496128 | 140496128 | G      | T | G | K         | exonic     | PCDHB5   | missense | NM_015669:p.A310S      |
| 12924 | 5 | 141338059 | 141338059 | C      | G | C | S         | exonic     | RNF14    | missense | NM_183401:p.A105G      |
| 12924 | 5 | 147909840 | 147909840 | G      | C | G | S         | intronic   | HTR4     | NA       | NA                     |
| 12924 | 5 | 150916071 | 150916071 | A      | G | A | R         | intronic   | FAT2     | NA       | NA                     |
| 12924 | 5 | 150925641 | 150925641 | A      | G | A | R         | exonic     | FAT2     | silent   | NM_001447:p.H1015H     |
| 12924 | 5 | 152853684 | 152853684 | G      | C | G | S         | exonic     | GRIA1    | missense | NM_000827:p.G29A       |
| 12924 | 5 | 154231535 | 154231535 | G      | A | G | R         | exonic     | CNOT8    | missense | NM_004779:p.E176K      |
| 12924 | 5 | 161256709 | 161256709 | G      | T | G | K         | exonic     | GABRA1   | missense | NM_001127648:p.K358N   |
| 12924 | 5 | 161256710 | 161256710 | G      | T | G | K         | exonic     | GABRA1   | missense | NM_001127648:p.D359Y   |
| 12924 | 5 | 168032882 | 168032882 | C      | A | C | M         | exonic     | SLIT3    | missense | NM_003062:p.S1240I     |
| 12924 | 5 | 168109208 | 168109208 | A      | C | A | M         | exonic     | SLIT3    | missense | NM_003062:p.S662A      |
| 12924 | 5 | 169466096 | 169466096 | G      | T | G | K         | exonic     | FOX11    | missense | NM_144769:p.R186L      |
| 12924 | 5 | 175042923 | 175042923 | C      | A | C | M         | exonic     | HRH2     | silent   | NM_001131055:p.V27V    |
| 12924 | 5 | 175958410 | 175958410 | C      | G | C | S         | exonic     | GPRIN1   | missense | NM_052899:p.R344S      |
| 12924 | 5 | 175958411 | 175958411 | C      | A | C | M         | exonic     | GPRIN1   | missense | NM_052899:p.R344M      |
| 12924 | 5 | 176616548 | 176616548 | G      | A | G | R         | intronic   | NSD1     | NA       | NA                     |
| 12924 | 5 | 178977143 | 178977143 | C      | G | C | S         | exonic     | HNRNPH1  | missense | NM_005520:p.M345I      |
| 12924 | 6 | 4661105   | 4661105   | A      | T | A | W         | ncRNA      | CDYL     | NA       | NA                     |
| 12924 | 6 | 4661106   | 4661106   | G      | T | G | K         | ncRNA      | CDYL     | NA       | NA                     |
| 12924 | 6 | 10047536  | 10047536  | C      | T | C | Y         | intergenic | NA       | NA       | NA                     |
| 12924 | 6 | 21339140  | 21339140  | G      | C | G | S         | exonic     | CDKAL1   | missense | NM_017774:p.R544T      |
| 12924 | 6 | 25957866  | 25957866  | C      | T | C | Y         | intronic   | SLC17A3  | NA       | NA                     |
| 12924 | 6 | 27813648  | 27813648  | G      | A | G | R         | intergenic | NA       | NA       | NA                     |
| 12924 | 6 | 29344566  | 29344566  | C      | A | C | M         | intergenic | NA       | NA       | NA                     |
| 12924 | 6 | 29473063  | 29473063  | C      | A | C | M         | exonic     | OR12D2   | missense | NM_013936:p.T203K      |
| 12924 | 6 | 31595936  | 31595936  | C      | A | C | M         | intergenic | NA       | NA       | NA                     |
| 12924 | 6 | 31657503  | 31657503  | G      | T | G | K         | intronic   | LTB      | NA       | NA                     |
| 12924 | 6 | 33025633  | 33025633  | C      | A | C | M         | exonic     | HLA-DMA  | missense | NM_006120:p.A129S      |
| 12924 | 6 | 36214580  | 36214580  | -      | G | A | */+G      | intronic   | MAPK13   | NA       | NA                     |
| 12924 | 6 | 36214582  | 36214582  | A      | G | A | R         | intronic   | MAPK13   | NA       | NA                     |
| 12924 | 6 | 36674590  | 36674590  | C      | G | C | S         | intronic   | SRSF3    | NA       | NA                     |
| 12924 | 6 | 39991938  | 39991938  | C      | G | C | S         | exonic     | MOCS1    | silent   | NM_005943:p.L145L      |
| 12924 | 6 | 42345060  | 42345060  | C      | A | C | M         | exonic     | TRERF1   | nonsense | NM_033502:p.G83X       |
| 12924 | 6 | 42345061  | 42345061  | C      | A | C | M         | exonic     | TRERF1   | missense | NM_033502:p.Q82H       |
| 12924 | 6 | 43043264  | 43043264  | C      | A | C | M         | exonic     | PEX6     | missense | NM_000287:p.M568I      |
| 12924 | 6 | 43043265  | 43043265  | A      | T | A | W         | exonic     | PEX6     | missense | NM_000287:p.M568K      |
| 12924 | 6 | 43751113  | 43751113  | C      | A | C | M         | intronic   | MRPS18A  | NA       | NA                     |
| 12924 | 6 | 50973618  | 50973618  | C      | G | C | S         | intergenic | NA       | NA       | NA                     |
| 12924 | 6 | 53354892  | 53354892  | A      | C | A | M         | intergenic | NA       | NA       | NA                     |
| 12924 | 6 | 64453671  | 64453671  | A      | T | A | W         | exonic     | PHF3     | missense | NM_015153:p.I697L      |
| 12924 | 6 | 70934808  | 70934808  | C      | A | C | M         | exonic     | COL19A1  | missense | NM_001858:p.P841T      |
| 12924 | 6 | 74233122  | 74233122  | A      | T | A | W         | intronic   | MTO1     | NA       | NA                     |
| 12924 | 6 | 80834594  | 80834594  | C      | A | C | M         | intergenic | NA       | NA       | NA                     |

|       |   |           |           |   |   |   |      |            |           |          |                       |
|-------|---|-----------|-----------|---|---|---|------|------------|-----------|----------|-----------------------|
| 12924 | 6 | 83955020  | 83955020  | T | G | T | K    | intronic   | PGM3      | NA       | NA                    |
| 12924 | 6 | 94022361  | 94022361  | T | C | T | Y    | exonic     | EPHA7     | missense | NM_004440:p.N763S     |
| 12924 | 6 | 105883473 | 105883473 | G | A | G | R    | exonic     | PREP      | silent   | NM_002726:p.V379V     |
| 12924 | 6 | 106756517 | 106756517 | T | A | T | W    | intronic   | ATG5      | NA       | NA                    |
| 12924 | 6 | 108349652 | 108349652 | C | A | C | M    | intronic   | SEC63     | NA       | NA                    |
| 12924 | 6 | 122046862 | 122046862 | G | A | G | R    | intergenic | NA        | NA       | NA                    |
| 12924 | 6 | 125638980 | 125638980 | T | C | T | Y    | UTR3       | HDDC2     | NA       | NA                    |
| 12924 | 6 | 127779604 | 127779604 | G | A | G | R    | intergenic | NA        | NA       | NA                    |
| 12924 | 6 | 132227718 | 132227718 | T | C | T | Y    | exonic     | ENPP1     | missense | NM_006208:p.Y371H     |
| 12924 | 6 | 132980509 | 132980509 | C | A | C | M    | exonic     | TAAR2     | missense | NM_001033080:p.G177W  |
| 12924 | 6 | 133231238 | 133231238 | G | A | G | R    | intergenic | NA        | NA       | NA                    |
| 12924 | 6 | 136510209 | 136510209 | C | A | C | M    | exonic     | PDE7B     | missense | NM_018945:p.T65N      |
| 12924 | 6 | 144224925 | 144224925 | G | T | G | K    | intronic   | LTV1      | NA       | NA                    |
| 12924 | 6 | 144851501 | 144851501 | G | - | A | */-G | splicing   | UTRN      | NA       | NA                    |
| 12924 | 6 | 149011202 | 149011202 | A | T | A | W    | intergenic | NA        | NA       | NA                    |
| 12924 | 6 | 149011213 | 149011213 | C | G | C | S    | intergenic | NA        | NA       | NA                    |
| 12924 | 6 | 151936038 | 151936038 | G | T | G | K    | exonic     | C6orf97   | nonsense | NM_025059:p.E271X     |
| 12924 | 6 | 152813931 | 152813931 | G | T | G | K    | exonic     | SYNE1     | silent   | NM_182961:p.R1044R    |
| 12924 | 6 | 161124024 | 161124024 | G | C | G | S    | intergenic | NA        | NA       | NA                    |
| 12924 | 6 | 161889863 | 161889863 | G | A | G | R    | intronic   | PARK2     | NA       | NA                    |
| 12924 | 7 | 2616171   | 2616171   | G | T | G | K    | intronic   | IQCE      | NA       | NA                    |
| 12924 | 7 | 10458811  | 10458811  | C | A | C | M    | intergenic | NA        | NA       | NA                    |
| 12924 | 7 | 12477716  | 12477716  | G | C | G | S    | intergenic | NA        | NA       | NA                    |
| 12924 | 7 | 20749080  | 20749080  | G | T | G | K    | exonic     | ABCB5     | missense | NM_001163941:p.R1027L |
| 12924 | 7 | 30784587  | 30784587  | A | T | A | W    | exonic     | FAM188B   | silent   | NM_032222:p.T26T      |
| 12924 | 7 | 31109409  | 31109409  | A | G | A | R    | exonic     | ADCYAP1R1 | silent   | NM_001118:p.P360P     |
| 12924 | 7 | 36638166  | 36638166  | C | T | C | Y    | splicing   | AOAH      | NA       | NA                    |
| 12924 | 7 | 41971302  | 41971302  | C | A | C | M    | exonic     | GLI3      | silent   | NM_000168:p.P1298P    |
| 12924 | 7 | 42801731  | 42801731  | G | C | G | S    | intergenic | NA        | NA       | NA                    |
| 12924 | 7 | 44766692  | 44766692  | C | G | C | S    | exonic     | ZMIZ2     | silent   | NM_031449:p.L405L     |
| 12924 | 7 | 50564455  | 50564455  | G | C | G | S    | exonic     | DDC       | missense | NM_000790:p.P172R     |
| 12924 | 7 | 50653182  | 50653182  | T | G | T | K    | intronic   | GRB10     | NA       | NA                    |
| 12924 | 7 | 51062921  | 51062921  | C | A | C | M    | exonic     | COBL      | silent   | NM_015198:p.G1122G    |
| 12924 | 7 | 51062922  | 51062922  | C | A | C | M    | exonic     | COBL      | missense | NM_015198:p.G1122V    |
| 12924 | 7 | 55878271  | 55878271  | T | A | T | W    | exonic     | 14-Sep    | missense | NM_207366:p.Y139F     |
| 12924 | 7 | 57221979  | 57221979  | A | T | A | W    | intergenic | NA        | NA       | NA                    |
| 12924 | 7 | 57346563  | 57346563  | C | T | C | Y    | intergenic | NA        | NA       | NA                    |
| 12924 | 7 | 63113040  | 63113040  | C | A | C | M    | intergenic | NA        | NA       | NA                    |
| 12924 | 7 | 63806231  | 63806231  | C | T | C | Y    | exonic     | ZNF107    | missense | NM_016220:p.S705L     |
| 12924 | 7 | 72348814  | 72348814  | C | A | C | M    | intergenic | NA        | NA       | NA                    |
| 12924 | 7 | 80123924  | 80123924  | G | T | G | K    | exonic     | CD36      | missense | NM_000072:p.V85F      |
| 12924 | 7 | 82835117  | 82835117  | G | T | G | K    | exonic     | SEMA3E    | missense | NM_001178129:p.N623K  |
| 12924 | 7 | 91550779  | 91550779  | G | C | G | S    | exonic     | AKAP9     | missense | NM_005751:p.L2840F    |
| 12924 | 7 | 98999458  | 98999458  | A | G | R | Y    | exonic     | ZNF655    | missense | NM_001009958:p.S58N   |
| 12924 | 7 | 107429315 | 107429315 | C | T | C | Y    | exonic     | LAMB1     | missense | NM_002291:p.R46Q      |
| 12924 | 7 | 116691853 | 116691853 | A | G | A | R    | intergenic | NA        | NA       | NA                    |
| 12924 | 7 | 124773416 | 124773416 | C | T | C | Y    | intergenic | NA        | NA       | NA                    |
| 12924 | 7 | 128886638 | 128886638 | G | T | G | K    | exonic     | FAM40B    | missense | NM_001134336:p.S462I  |
| 12924 | 7 | 140960439 | 140960439 | A | C | A | M    | exonic     | AGK       | missense | NM_018238:p.T139P     |
| 12924 | 7 | 142181685 | 142181685 | C | A | C | M    | intronic   | PRSS2     | NA       | NA                    |
| 12924 | 7 | 150446399 | 150446399 | C | T | C | Y    | intronic   | AGAP3     | NA       | NA                    |
| 12924 | 7 | 150552060 | 150552060 | C | T | C | Y    | exonic     | ABCF2     | silent   | NM_007189:p.L147L     |
| 12924 | 7 | 156219709 | 156219709 | A | G | A | R    | exonic     | LMBR1     | missense | NM_022458:p.L254P     |
| 12924 | 8 | 655883    | 655883    | C | A | C | M    | exonic     | ERICH1    | missense | NM_207332:p.Q49H      |
| 12924 | 8 | 10507986  | 10507986  | G | A | G | R    | exonic     | RP11L     | silent   | NM_178857:p.G344G     |
| 12924 | 8 | 12996689  | 12996689  | T | A | T | W    | exonic     | DLC1      | missense | NM_006094:p.E722V     |
| 12924 | 8 | 19863964  | 19863964  | G | A | G | R    | exonic     | LPL       | missense | NM_000237:p.V461I     |
| 12924 | 8 | 23051360  | 23051360  | C | A | C | M    | exonic     | TNFRSF10D | missense | NM_003840:p.D377Y     |
| 12924 | 8 | 30481518  | 30481518  | C | G | C | S    | intronic   | RBPMS     | NA       | NA                    |
| 12924 | 8 | 3521564   | 3521564   | C | A | C | M    | intronic   | UNC5D     | NA       | NA                    |
| 12924 | 8 | 73104745  | 73104745  | A | T | A | W    | exonic     | TRPA1     | missense | NM_007332:p.V961D     |
| 12924 | 8 | 80646325  | 80646325  | G | T | G | K    | intergenic | NA        | NA       | NA                    |
| 12924 | 8 | 82876237  | 82876237  | C | A | C | M    | UTR3       | SNX16     | NA       | NA                    |
| 12924 | 8 | 86716993  | 86716993  | C | G | C | S    | intergenic | NA        | NA       | NA                    |
| 12924 | 8 | 87311127  | 87311127  | G | T | G | K    | exonic     | SLC7A13   | missense | NM_138817:p.L166M     |
| 12924 | 8 | 99286473  | 99286473  | C | A | C | M    | intronic   | NIPAL2    | NA       | NA                    |
| 12924 | 8 | 104005180 | 104005180 | G | A | G | R    | intergenic | NA        | NA       | NA                    |
| 12924 | 8 | 104741001 | 104741001 | T | G | T | K    | intronic   | RIMS2     | NA       | NA                    |
| 12924 | 8 | 107792181 | 107792181 | G | T | G | K    | exonic     | OXR1      | missense | NM_018002:p.V594L     |
| 12924 | 8 | 111054016 | 111054016 | C | A | C | M    | exonic     | KCNV1     | missense | NM_014379:p.G213V     |
| 12924 | 8 | 113638271 | 113638271 | G | T | G | K    | exonic     | CSMD3     | silent   | NM_198123:p.I1377I    |
| 12924 | 8 | 113771500 | 113771500 | A | G | A | R    | intronic   | CSMD3     | NA       | NA                    |
| 12924 | 8 | 114057708 | 114057708 | A | C | A | M    | intronic   | CSMD3     | NA       | NA                    |
| 12924 | 8 | 125127165 | 125127165 | C | T | C | Y    | intronic   | FER1L6    | NA       | NA                    |
| 12924 | 8 | 131931118 | 131931118 | C | G | C | S    | exonic     | ADCY8     | missense | NM_001115:p.C775S     |
| 12924 | 8 | 133968378 | 133968378 | G | C | G | S    | exonic     | TG        | missense | NM_003235:p.D527H     |
| 12924 | 8 | 133968397 | 133968397 | G | T | G | K    | exonic     | TG        | missense | NM_003235:p.G533V     |
| 12924 | 8 | 134176567 | 134176567 | C | A | C | M    | exonic     | TG        | missense | NM_003235:p.S2446Y    |
| 12924 | 8 | 139224537 | 139224537 | G | A | G | R    | intronic   | FAM135B   | NA       | NA                    |

|       |    |           |           |   |   |   |   |            |            |          |                      |
|-------|----|-----------|-----------|---|---|---|---|------------|------------|----------|----------------------|
| 12924 | 8  | 141611768 | 141611768 | T | A | T | W | exonic     | EIF2C2     | silent   | NM_012154:p.P800P    |
| 12924 | 9  | 6318795   | 6318795   | C | A | C | M | exonic     | TPD52L3    | missense | NM_001001875:p.T67N  |
| 12924 | 9  | 13976581  | 13976581  | A | T | A | W | intergenic | NA         | NA       | NA                   |
| 12924 | 9  | 14652206  | 14652206  | T | C | T | Y | intronic   | ZDHHC21    | NA       | NA                   |
| 12924 | 9  | 32478060  | 32478060  | G | C | G | S | exonic     | DDX58      | missense | NM_014314:p.I365M    |
| 12924 | 9  | 34986278  | 34986278  | T | A | T | W | exonic     | DNAJB5     | silent   | NM_001135004:p.G110G |
| 12924 | 9  | 67903405  | 67903405  | G | T | G | K | intergenic | NA         | NA       | NA                   |
| 12924 | 9  | 68120493  | 68120493  | T | C | T | Y | ncRNA      | LOC1001323 | NA       | NA                   |
| 12924 | 9  | 73394305  | 73394305  | G | A | G | R | intergenic | NA         | NA       | NA                   |
| 12924 | 9  | 96386643  | 96386643  | C | T | C | Y | intronic   | FBP2       | NA       | NA                   |
| 12924 | 9  | 98054994  | 98054994  | A | T | A | W | exonic     | HSD17B3    | missense | NM_000197:p.S99R     |
| 12924 | 9  | 102042229 | 102042229 | G | T | G | K | exonic     | INVS       | missense | NM_183245:p.A228S    |
| 12924 | 9  | 107158366 | 107158366 | G | T | G | K | exonic     | SLC44A1    | missense | NM_080546:p.A185S    |
| 12924 | 9  | 107398653 | 107398653 | A | T | A | W | intronic   | FKTN       | NA       | NA                   |
| 12924 | 9  | 110664742 | 110664742 | G | A | G | R | exonic     | ACTL7A     | missense | NM_006687:p.A107T    |
| 12924 | 9  | 128197599 | 128197599 | G | A | G | R | intronic   | FAM125B    | NA       | NA                   |
| 12924 | 9  | 133066956 | 133066956 | A | G | A | R | intronic   | NUP214     | NA       | NA                   |
| 12924 | 9  | 138516312 | 138516312 | C | A | C | M | exonic     | NOTCH1     | nonsense | NM_017617:p.E1812X   |
| 12924 | 9  | 139578715 | 139578715 | T | A | T | W | exonic     | WDR85      | missense | NM_138778:p.K314M    |
| 12924 | 10 | 1056809   | 1056809   | G | T | G | K | exonic     | IDI2       | missense | NM_033261:p.H88Q     |
| 12924 | 10 | 6546296   | 6546296   | T | A | T | W | exonic     | PRKCQ      | missense | NM_006257:p.D477V    |
| 12924 | 10 | 14856374  | 14856374  | C | A | C | M | exonic     | FAM107B    | missense | NM_031453:p.A99S     |
| 12924 | 10 | 17211213  | 17211213  | C | A | C | M | exonic     | CUBN       | silent   | NM_001081:p.T55T     |
| 12924 | 10 | 18282459  | 18282459  | G | A | G | R | exonic     | SLC39A12   | missense | NM_152725:p.G83E     |
| 12924 | 10 | 21999614  | 21999614  | G | T | G | K | exonic     | MLLT10     | silent   | NM_001009569:p.V342V |
| 12924 | 10 | 24914280  | 24914280  | C | G | C | S | exonic     | ARHGAP21   | missense | NM_020824:p.L1648F   |
| 12924 | 10 | 45507501  | 45507501  | C | A | C | M | intergenic | NA         | NA       | NA                   |
| 12924 | 10 | 51219559  | 51219559  | G | T | G | K | UTR5       | MSMB       | NA       | NA                   |
| 12924 | 10 | 53128238  | 53128238  | G | A | G | R | exonic     | CSTF2T     | nonsense | NM_015235:p.Q360X    |
| 12924 | 10 | 60243792  | 60243792  | G | A | G | R | intronic   | BICC1      | NA       | NA                   |
| 12924 | 10 | 65600053  | 65600053  | G | C | G | S | intergenic | NA         | NA       | NA                   |
| 12924 | 10 | 66599443  | 66599443  | C | T | C | Y | intergenic | NA         | NA       | NA                   |
| 12924 | 10 | 67418483  | 67418483  | A | T | A | W | exonic     | CTNNA3     | missense | NM_013266:p.D746E    |
| 12924 | 10 | 68051428  | 68051428  | C | G | C | S | intronic   | CTNNA3     | NA       | NA                   |
| 12924 | 10 | 69572807  | 69572807  | C | A | C | M | exonic     | MYPN       | missense | NM_032578:p.T336K    |
| 12924 | 10 | 70177149  | 70177149  | A | G | A | R | exonic     | CCAR1      | missense | NM_018237:p.T216A    |
| 12924 | 10 | 70695406  | 70695406  | C | A | C | M | exonic     | HKDC1      | missense | NM_025130:p.T811K    |
| 12924 | 10 | 74362246  | 74362246  | G | A | G | R | exonic     | OIT3       | silent   | NM_152635:p.Q532Q    |
| 12924 | 10 | 87474302  | 87474302  | C | G | C | S | exonic     | GRID1      | missense | NM_017551:p.E549Q    |
| 12924 | 10 | 96437927  | 96437927  | G | T | G | K | exonic     | CYP2C18    | missense | NM_001128925:p.M129I |
| 12924 | 10 | 96524755  | 96524755  | A | G | A | R | intronic   | CYP2C19    | NA       | NA                   |
| 12924 | 10 | 99351673  | 99351673  | G | A | G | R | exonic     | DHAPSL     | missense | NM_138413:p.C257Y    |
| 12924 | 10 | 118349706 | 118349706 | C | T | C | Y | intronic   | PNLIPRP1   | NA       | NA                   |
| 12924 | 10 | 134874980 | 134874980 | G | T | G | K | exonic     | KNDC1      | missense | NM_152643:p.A1325S   |
| 12924 | 10 | 135195323 | 135195323 | G | T | G | K | intronic   | CYP2E1     | NA       | NA                   |
| 12924 | 11 | 4747630   | 4747630   | G | T | G | K | exonic     | OR51F1     | missense | NM_001004752:p.P32T  |
| 12924 | 11 | 4901472   | 4901472   | C | A | C | M | exonic     | OR51G1     | missense | NM_001005237:p.R225L |
| 12924 | 11 | 5037138   | 5037138   | C | T | C | Y | exonic     | OR52E2     | missense | NM_001005164:p.C99Y  |
| 12924 | 11 | 5098745   | 5098745   | G | T | G | K | exonic     | OR52A4     | missense | NM_001005222:p.L214I |
| 12924 | 11 | 5755928   | 5755928   | C | A | C | M | exonic     | OR52N5     | missense | NM_001001922:p.L171F |
| 12924 | 11 | 6201812   | 6201812   | C | A | C | M | exonic     | FAM160A2   | silent   | NM_032127:p.R127R    |
| 12924 | 11 | 13335039  | 13335039  | C | A | C | M | intronic   | ARNTL      | NA       | NA                   |
| 12924 | 11 | 18174792  | 18174792  | G | C | G | S | intergenic | NA         | NA       | NA                   |
| 12924 | 11 | 25566690  | 25566690  | G | T | G | K | intergenic | NA         | NA       | NA                   |
| 12924 | 11 | 26525602  | 26525602  | G | T | G | K | exonic     | ANO3       | missense | NM_031418:p.L406F    |
| 12924 | 11 | 26676542  | 26676542  | G | C | G | S | exonic     | SLC5A12    | nonsense | NM_178498:p.S313X    |
| 12924 | 11 | 32661771  | 32661771  | C | T | C | Y | intronic   | CCDC73     | NA       | NA                   |
| 12924 | 11 | 36379333  | 36379333  | C | T | C | Y | exonic     | PRR5L      | missense | NM_001160167:p.S29F  |
| 12924 | 11 | 36551982  | 36551982  | C | A | C | M | exonic     | RAG1       | missense | NM_000448:p.H184Q    |
| 12924 | 11 | 44915651  | 44915651  | C | A | C | M | intronic   | TP53I11    | NA       | NA                   |
| 12924 | 11 | 48588901  | 48588901  | C | G | C | S | intergenic | NA         | NA       | NA                   |
| 12924 | 11 | 49284056  | 49284056  | C | A | C | M | intergenic | NA         | NA       | NA                   |
| 12924 | 11 | 49876525  | 49876525  | G | A | G | R | intergenic | NA         | NA       | NA                   |
| 12924 | 11 | 54791804  | 54791804  | C | A | C | M | intronic   | TRIM48     | NA       | NA                   |
| 12924 | 11 | 55870081  | 55870081  | A | T | A | W | upstream   | OR8K1      | NA       | NA                   |
| 12924 | 11 | 56857003  | 56857003  | C | A | C | M | intronic   | SSRP1      | NA       | NA                   |
| 12924 | 11 | 56857011  | 56857011  | C | A | C | M | exonic     | SSRP1      | nonsense | NM_003146:p.E179X    |
| 12924 | 11 | 57873765  | 57873765  | C | G | C | S | intergenic | NA         | NA       | NA                   |
| 12924 | 11 | 57890016  | 57890016  | C | G | C | S | intergenic | NA         | NA       | NA                   |
| 12924 | 11 | 58358583  | 58358583  | C | A | C | M | exonic     | GLYATL2    | silent   | NM_145016:p.V260V    |
| 12924 | 11 | 58358584  | 58358584  | A | C | A | M | exonic     | GLYATL2    | missense | NM_145016:p.V260G    |
| 12924 | 11 | 63782865  | 63782865  | A | C | A | M | intronic   | PLCB3      | NA       | NA                   |
| 12924 | 11 | 65123444  | 65123444  | G | T | G | K | exonic     | MAP3K11    | missense | NM_002419:p.R735S    |
| 12924 | 11 | 66214202  | 66214202  | G | T | G | K | exonic     | SPTBN2     | silent   | NM_006946:p.A1898A   |
| 12924 | 11 | 75741084  | 75741084  | T | A | T | W | exonic     | PRKRIR     | missense | NM_004705:p.E253V    |
| 12924 | 11 | 88222759  | 88222759  | G | C | G | S | exonic     | GRM5       | missense | NM_000842:p.R292G    |
| 12924 | 11 | 88551511  | 88551511  | A | C | A | M | exonic     | TYR        | missense | NM_000372:p.T248P    |
| 12924 | 11 | 92354351  | 92354351  | G | T | G | K | exonic     | MTNR1B     | missense | NM_005959:p.G105V    |
| 12924 | 11 | 104281477 | 104281477 | C | G | C | S | ncRNA      | LOC643733  | NA       | NA                   |



|       |    |           |           |   |   |   |      |            |          |          |                      |
|-------|----|-----------|-----------|---|---|---|------|------------|----------|----------|----------------------|
| 12924 | 11 | 106203119 | 106203119 | C | T | C | Y    | intronic   | GUCY1A2  | NA       | NA                   |
| 12924 | 11 | 107179161 | 107179161 | G | T | G | K    | intronic   | SLC35F2  | NA       | NA                   |
| 12924 | 11 | 113440281 | 113440281 | C | T | C | Y    | exonic     | ZBTB16   | missense | NM_001018011:p.S350F |
| 12924 | 11 | 118690910 | 118690910 | G | T | G | K    | exonic     | MCAM     | silent   | NM_006500:p.G81G     |
| 12924 | 11 | 122280229 | 122280229 | G | T | G | K    | exonic     | C11orf63 | missense | NM_199124:p.R244L    |
| 12924 | 11 | 123398954 | 123398954 | G | A | G | R    | exonic     | OR10G9   | missense | NM_001001953:p.A9T   |
| 12924 | 11 | 123757562 | 123757562 | G | A | G | R    | exonic     | OR8B2    | silent   | NM_001005468:p.V296V |
| 12924 | 11 | 123945084 | 123945084 | G | A | G | R    | upstream   | OR8A1    | NA       | NA                   |
| 12924 | 11 | 129257318 | 129257318 | T | C | T | Y    | intronic   | NFRKB    | NA       | NA                   |
| 12924 | 11 | 133618399 | 133618399 | G | C | G | S    | splicing   | VPS26B   | NA       | NA                   |
| 12924 | 12 | 532859    | 532859    | C | A | C | M    | exonic     | B4GALNT3 | silent   | NM_173593:p.T503T    |
| 12924 | 12 | 3562638   | 3562638   | G | A | G | R    | intronic   | PRMT8    | NA       | NA                   |
| 12924 | 12 | 6618521   | 6618521   | C | T | C | Y    | intronic   | ACRBP    | NA       | NA                   |
| 12924 | 12 | 6650105   | 6650105   | G | A | G | R    | intronic   | ZNF384   | NA       | NA                   |
| 12924 | 12 | 7538969   | 7538969   | A | G | A | R    | exonic     | CD163    | silent   | NM_004244:p.Y465Y    |
| 12924 | 12 | 7610627   | 7610627   | C | A | C | M    | intergenic | NA       | NA       | NA                   |
| 12924 | 12 | 7914827   | 7914827   | G | T | G | K    | UTR5       | SLC2A14  | NA       | NA                   |
| 12924 | 12 | 8578698   | 8578698   | T | G | T | K    | intronic   | CLEC4E   | NA       | NA                   |
| 12924 | 12 | 9200159   | 9200159   | A | G | A | R    | intronic   | P2P      | NA       | NA                   |
| 12924 | 12 | 10133019  | 10133019  | A | T | A | W    | exonic     | CLEC1A   | missense | NM_016511:p.L62Q     |
| 12924 | 12 | 11913902  | 11913902  | G | A | G | R    | exonic     | ETV6     | silent   | NM_001987:p.A247A    |
| 12924 | 12 | 15484217  | 15484217  | T | G | T | K    | intronic   | PTPRO    | NA       | NA                   |
| 12924 | 12 | 15631135  | 15631135  | C | A | C | M    | exonic     | PTPRO    | missense | NM_030668:p.T259N    |
| 12924 | 12 | 21339899  | 21339899  | T | A | T | W    | exonic     | SLCO1A2  | silent   | NM_021094:p.I390I    |
| 12924 | 12 | 21358771  | 21358771  | A | T | A | W    | exonic     | SLCO1A2  | missense | NM_021094:p.L105Q    |
| 12924 | 12 | 25134435  | 25134435  | C | T | C | Y    | intronic   | LRMP     | NA       | NA                   |
| 12924 | 12 | 33762283  | 33762283  | G | T | G | K    | intergenic | NA       | NA       | NA                   |
| 12924 | 12 | 36882252  | 36882252  | G | T | G | K    | intergenic | NA       | NA       | NA                   |
| 12924 | 12 | 38954937  | 38954937  | G | T | G | K    | exonic     | LRRK2    | missense | NM_198578:p.G606C    |
| 12924 | 12 | 43752378  | 43752378  | G | T | G | K    | intergenic | NA       | NA       | NA                   |
| 12924 | 12 | 50570772  | 50570772  | T | A | T | W    | exonic     | ANKRD33  | missense | NM_001130015:p.Y134N |
| 12924 | 12 | 54995144  | 54995144  | C | T | C | Y    | intronic   | CNPY2    | NA       | NA                   |
| 12924 | 12 | 55134240  | 55134240  | C | A | C | M    | intronic   | MIP      | NA       | NA                   |
| 12924 | 12 | 70316946  | 70316946  | C | A | C | M    | exonic     | ZFC3H1   | missense | NM_144982:p.R629L    |
| 12924 | 12 | 77036028  | 77036028  | C | T | C | Y    | exonic     | NAV3     | missense | NM_014903:p.H954Y    |
| 12924 | 12 | 77036052  | 77036052  | A | T | A | W    | exonic     | NAV3     | nonsense | NM_014903:p.K962X    |
| 12924 | 12 | 77711972  | 77711972  | G | A | G | R    | intergenic | NA       | NA       | NA                   |
| 12924 | 12 | 79763775  | 79763775  | T | A | T | W    | exonic     | LIN7A    | missense | NM_004664:p.E116D    |
| 12924 | 12 | 81775077  | 81775077  | G | A | G | R    | exonic     | TMTC2    | missense | NM_152588:p.G81R     |
| 12924 | 12 | 84800322  | 84800322  | T | C | T | Y    | UTR3       | NTS      | NA       | NA                   |
| 12924 | 12 | 87084352  | 87084352  | G | A | G | R    | exonic     | TMTC3    | nonsense | NM_181783:p.W304X    |
| 12924 | 12 | 99275387  | 99275387  | G | T | G | K    | exonic     | SLC17A8  | missense | NM_001145288:p.L29F  |
| 12924 | 12 | 102592062 | 102592062 | G | T | G | K    | intronic   | STAB2    | NA       | NA                   |
| 12924 | 12 | 105638841 | 105638841 | C | A | C | M    | intronic   | RFX4     | NA       | NA                   |
| 12924 | 12 | 107145090 | 107145090 | C | A | C | M    | intronic   | WSCD2    | NA       | NA                   |
| 12924 | 12 | 109652806 | 109652806 | T | C | T | Y    | exonic     | PPP1CC   | missense | NM_002710:p.Y110C    |
| 12924 | 12 | 119060141 | 119060141 | G | A | G | R    | exonic     | GCN1L1   | missense | NM_006836:p.P2114S   |
| 12924 | 12 | 126369007 | 126369007 | C | T | C | Y    | intergenic | NA       | NA       | NA                   |
| 12924 | 12 | 126674865 | 126674865 | G | T | G | K    | intergenic | NA       | NA       | NA                   |
| 12924 | 12 | 126676741 | 126676741 | C | A | C | M    | intergenic | NA       | NA       | NA                   |
| 12924 | 13 | 20575300  | 20575300  | C | A | C | M    | intergenic | NA       | NA       | NA                   |
| 12924 | 13 | 23958521  | 23958521  | C | A | C | M    | intronic   | PARP4    | NA       | NA                   |
| 12924 | 13 | 24322579  | 24322579  | G | A | G | R    | exonic     | RNF17    | missense | NM_031277:p.E1068K   |
| 12924 | 13 | 25049222  | 25049222  | G | A | G | R    | exonic     | ATP8A2   | missense | NM_016529:p.M576I    |
| 12924 | 13 | 31596542  | 31596542  | G | T | G | K    | intronic   | FRY      | NA       | NA                   |
| 12924 | 13 | 34947750  | 34947750  | A | C | A | M    | exonic     | MAB21L1  | missense | NM_005584:p.C176G    |
| 12924 | 13 | 38348391  | 38348391  | G | T | G | K    | exonic     | FREM2    | missense | NM_207361:p.D2806Y   |
| 12924 | 13 | 38349381  | 38349381  | G | T | G | K    | splicing   | FREM2    | NA       | NA                   |
| 12924 | 13 | 69212669  | 69212669  | G | T | G | K    | exonic     | KLHL1    | missense | NM_020866:p.P554T    |
| 12924 | 13 | 78323369  | 78323369  | G | A | G | R    | intergenic | NA       | NA       | NA                   |
| 12924 | 13 | 78382412  | 78382412  | - | A | C | */+A | ncRNA      | MIR548A2 | NA       | NA                   |
| 12924 | 13 | 90581882  | 90581882  | A | G | A | R    | intergenic | NA       | NA       | NA                   |
| 12924 | 13 | 98137885  | 98137885  | C | G | C | S    | exonic     | SLC15A1  | missense | NM_005073:p.C593S    |
| 12924 | 13 | 100512332 | 100512332 | G | A | G | R    | exonic     | NALCN    | missense | NM_052867:p.R1582C   |
| 12924 | 13 | 100518411 | 100518411 | A | T | A | W    | intronic   | NALCN    | NA       | NA                   |
| 12924 | 13 | 102241716 | 102241716 | G | T | G | K    | exonic     | KDELC1   | silent   | NM_024089:p.S246S    |
| 12924 | 14 | 20066043  | 20066043  | G | A | G | R    | intergenic | NA       | NA       | NA                   |
| 12924 | 14 | 22956241  | 22956241  | G | A | G | R    | exonic     | MYH7     | missense | NM_000257:p.H1494Y   |
| 12924 | 14 | 23593598  | 23593598  | G | A | G | R    | intronic   | LRRC16B  | NA       | NA                   |
| 12924 | 14 | 23616649  | 23616649  | C | A | C | M    | exonic     | CPNE6    | missense | NM_006032:p.P515H    |
| 12924 | 14 | 23915059  | 23915059  | G | C | G | S    | exonic     | NFATC4   | missense | NM_001136022:p.K719N |
| 12924 | 14 | 50786021  | 50786021  | G | T | G | K    | exonic     | TMX1     | missense | NM_030755:p.G192V    |
| 12924 | 14 | 51692348  | 51692348  | A | T | A | W    | intergenic | NA       | NA       | NA                   |
| 12924 | 14 | 59000288  | 59000288  | G | A | G | R    | exonic     | GPR135   | silent   | NM_022571:p.C470C    |
| 12924 | 14 | 60030510  | 60030510  | G | T | G | K    | intergenic | NA       | NA       | NA                   |
| 12924 | 14 | 62141986  | 62141986  | T | C | T | Y    | intergenic | NA       | NA       | NA                   |
| 12924 | 14 | 66313014  | 66313014  | C | T | C | Y    | intronic   | GPHN     | NA       | NA                   |
| 12924 | 14 | 69314997  | 69314997  | C | T | C | Y    | exonic     | SLC10A1  | missense | NM_003049:p.C250Y    |
| 12924 | 14 | 70060165  | 70060165  | G | T | G | K    | exonic     | ADAM20   | missense | NM_003814:p.Q405K    |

|       |    |           |           |   |   |   |      |            |            |          |                            |
|-------|----|-----------|-----------|---|---|---|------|------------|------------|----------|----------------------------|
| 12924 | 14 | 74043683  | 74043683  | G | A | G | R    | exonic     | LTBP2      | silent   | NM_000428:p.L1287L         |
| 12924 | 14 | 75716811  | 75716811  | G | T | G | K    | intronic   | C14orf118  | NA       | NA                         |
| 12924 | 14 | 76345539  | 76345539  | T | C | T | Y    | exonic     | ANGEL1     | missense | NM_015305:p.S89G           |
| 12924 | 14 | 80321272  | 80321272  | C | A | C | M    | exonic     | C14orf145  | missense | NM_152446:p.R644L          |
| 12924 | 14 | 87477507  | 87477507  | C | A | C | M    | exonic     | GALC       | missense | NM_000153:p.V607F          |
| 12924 | 14 | 93113962  | 93113962  | G | T | G | K    | exonic     | KIAA1409   | missense | NM_020818:p.G568C          |
| 12924 | 14 | 94025772  | 94025772  | T | C | T | Y    | exonic     | SERPINA12  | missense | NM_173850:p.I331V          |
| 12924 | 14 | 94124007  | 94124007  | G | T | G | K    | exonic     | SERPINA5   | silent   | NM_000624:p.V185V          |
| 12924 | 14 | 95883411  | 95883411  | C | A | C | M    | exonic     | ATG2B      | missense | NM_018036:p.E61D           |
| 12924 | 14 | 98252409  | 98252409  | G | T | G | K    | exonic     | C14orf177  | missense | NM_182560:p.S43I           |
| 12924 | 14 | 101097691 | 101097691 | C | A | C | M    | exonic     | DIO3       | silent   | NM_001362:p.S35S           |
| 12924 | 15 | 23043560  | 23043560  | C | A | C | M    | upstream   | SNORD115-1 | NA       | NA                         |
| 12924 | 15 | 23498271  | 23498271  | C | G | C | S    | exonic     | ATP10A     | missense | NM_024490:p.G882A          |
| 12924 | 15 | 33032326  | 33032326  | T | A | T | W    | intronic   | AQR        | NA       | NA                         |
| 12924 | 15 | 38086513  | 38086513  | C | G | C | S    | exonic     | EIF2AK4    | missense | NM_001013703:p.P1121R      |
| 12924 | 15 | 38096102  | 38096102  | G | T | G | K    | exonic     | EIF2AK4    | missense | NM_001013703:p.K1289N      |
| 12924 | 15 | 38471381  | 38471381  | C | T | C | Y    | intronic   | C15orf23   | NA       | NA                         |
| 12924 | 15 | 41678398  | 41678398  | G | T | G | K    | exonic     | CKMT1B     | missense | NM_020990:p.G365C          |
| 12924 | 15 | 45840900  | 45840900  | C | G | C | S    | exonic     | SEMA6D     | missense | NM_153617:p.P143A          |
| 12924 | 15 | 51695685  | 51695685  | C | T | C | Y    | exonic     | WDR72      | silent   | NM_182758:p.V670V          |
| 12924 | 15 | 53719158  | 53719158  | A | G | A | R    | exonic     | PRTG       | silent   | NM_173814:p.N766N          |
| 12924 | 15 | 57632219  | 57632219  | C | T | C | Y    | intergenic | NA         | NA       | NA                         |
| 12924 | 15 | 61424704  | 61424704  | C | A | C | M    | intronic   | CA12       | NA       | NA                         |
| 12924 | 15 | 62753289  | 62753289  | A | T | A | W    | exonic     | ZNF609     | missense | NM_015042:p.T395S          |
| 12924 | 15 | 63411498  | 63411498  | C | A | C | M    | splicing   | IGDCC3     | NA       | NA                         |
| 12924 | 15 | 68766961  | 68766961  | C | A | C | M    | exonic     | UACA       | missense | NM_001008224:p.D179Y       |
| 12924 | 15 | 69420898  | 69420898  | A | T | A | W    | intronic   | THSD4      | NA       | NA                         |
| 12924 | 15 | 70070541  | 70070541  | C | T | C | Y    | exonic     | MYO9A      | missense | NM_006901:p.R560H          |
| 12924 | 15 | 76811678  | 76811678  | G | T | G | K    | intergenic | NA         | NA       | NA                         |
| 12924 | 15 | 77542569  | 77542569  | C | G | C | S    | exonic     | KIAA1024   | missense | NM_015206:p.L802V          |
| 12924 | 15 | 77639250  | 77639250  | C | A | C | M    | intergenic | NA         | NA       | NA                         |
| 12924 | 15 | 78659992  | 78659992  | G | C | G | S    | intronic   | ARNT2      | NA       | NA                         |
| 12924 | 15 | 81723674  | 81723674  | C | A | C | M    | exonic     | BNC1       | missense | NM_001717:p.V445L          |
| 12924 | 15 | 89293692  | 89293692  | G | A | G | R    | intronic   | UNC45A     | NA       | NA                         |
| 12924 | 16 | 4768002   | 4768002   | T | A | T | W    | splicing   | 12-Sep     | NA       | NA                         |
| 12924 | 16 | 5260514   | 5260514   | G | T | G | K    | intergenic | NA         | NA       | NA                         |
| 12924 | 16 | 11737413  | 11737413  | C | A | C | M    | exonic     | TXNDC11    | missense | NM_015914:p.R144S          |
| 12924 | 16 | 20350163  | 20350163  | C | A | C | M    | intronic   | ACSM5      | NA       | NA                         |
| 12924 | 16 | 20555657  | 20555657  | C | T | C | Y    | exonic     | ACSM1      | missense | NM_052956:p.D402N          |
| 12924 | 16 | 27053619  | 27053619  | G | C | G | S    | intergenic | NA         | NA       | NA                         |
| 12924 | 16 | 31674398  | 31674398  | T | A | T | W    | intronic   | ZNF720     | NA       | NA                         |
| 12924 | 16 | 33859797  | 33859797  | T | C | T | Y    | intergenic | NA         | NA       | NA                         |
| 12924 | 16 | 45175061  | 45175061  | C | T | C | Y    | exonic     | SHCBP1     | missense | NM_024745:p.D521N          |
| 12924 | 16 | 45263815  | 45263815  | T | C | T | Y    | exonic     | VPS35      | missense | NM_018206:p.N411D          |
| 12924 | 16 | 46699933  | 46699933  | G | T | G | K    | exonic     | ABCC12     | missense | NM_033226:p.H764N          |
| 12924 | 16 | 48227134  | 48227134  | G | C | G | S    | exonic     | ZNF423     | missense | NM_015069:p.R1144G         |
| 12924 | 16 | 49303492  | 49303492  | G | A | G | R    | exonic     | NOD2       | silent   | NM_022162:p.P723P          |
| 12924 | 16 | 54166097  | 54166097  | G | A | G | R    | exonic     | LPCAT2     | silent   | NM_017839:p.L423L          |
| 12924 | 16 | 54457380  | 54457380  | C | A | C | M    | exonic     | CES7       | missense | NM_001190158:p.S263I       |
| 12924 | 16 | 54465390  | 54465390  | A | C | A | M    | exonic     | CES7       | missense | NM_001190158:p.V74G        |
| 12924 | 16 | 56158919  | 56158919  | G | C | G | S    | exonic     | GPR114     | missense | NM_153837:p.A246P          |
| 12924 | 16 | 56291488  | 56291488  | G | A | G | R    | intronic   | CCDC135    | NA       | NA                         |
| 12924 | 16 | 63564318  | 63564318  | T | C | T | Y    | exonic     | CDH11      | silent   | NM_001797:p.A460A          |
| 12924 | 16 | 63564319  | 63564319  | G | T | G | K    | exonic     | CDH11      | missense | NM_001797:p.A460E          |
| 12924 | 16 | 68333960  | 68333960  | G | A | G | R    | exonic     | NOB1       | missense | NM_014062:p.H339Y          |
| 12924 | 16 | 68530848  | 68530848  | G | C | G | S    | intronic   | WWP2       | NA       | NA                         |
| 12924 | 16 | 70699899  | 70699899  | G | T | G | K    | exonic     | DHX38      | missense | NM_014003:p.K1049N         |
| 12924 | 16 | 70699900  | 70699900  | G | T | G | K    | exonic     | DHX38      | missense | NM_014003:p.D1050Y         |
| 12924 | 16 | 75958813  | 75958813  | G | A | G | R    | intronic   | ADAMTS18   | NA       | NA                         |
| 12924 | 16 | 76484132  | 76484132  | C | A | C | M    | intronic   | VAT1L      | NA       | NA                         |
| 12924 | 16 | 83077892  | 83077892  | C | T | C | Y    | exonic     | KIAA1609   | silent   | NM_020947:p.L268L          |
| 12924 | 17 | 1465068   | 1465068   | C | T | C | Y    | exonic     | SLC43A2    | missense | NM_152346:p.A127T          |
| 12924 | 17 | 3540201   | 3540201   | C | A | C | M    | intronic   | P2RX5      | NA       | NA                         |
| 12924 | 17 | 7520196   | 7520196   | G | - | C | */-G | exonic     | TP53       | FS_del   | NM_001126114:c.216_216delC |
| 12924 | 17 | 7739310   | 7739310   | C | T | C | Y    | intronic   | CHD3       | NA       | NA                         |
| 12924 | 17 | 10253484  | 10253484  | G | C | G | S    | exonic     | MYH8       | silent   | NM_002472:p.A578A          |
| 12924 | 17 | 10341200  | 10341200  | C | A | C | M    | exonic     | MYH1       | nonsense | NM_005963:p.G1523X         |
| 12924 | 17 | 10370759  | 10370759  | G | A | G | R    | exonic     | MYH2       | nonsense | NM_017534:p.Q1357X         |
| 12924 | 17 | 15905731  | 15905731  | G | A | G | R    | exonic     | NCOR1      | nonsense | NM_006311:p.Q1864X         |
| 12924 | 17 | 23058372  | 23058372  | C | A | C | M    | intergenic | NA         | NA       | NA                         |
| 12924 | 17 | 36190261  | 36190261  | C | A | C | M    | intronic   | KRT27      | NA       | NA                         |
| 12924 | 17 | 40400505  | 40400505  | G | C | G | S    | exonic     | C1QL1      | silent   | NM_006688:p.L146L          |
| 12924 | 17 | 42652427  | 42652427  | G | T | G | K    | intronic   | MYL4       | NA       | NA                         |
| 12924 | 17 | 43177084  | 43177084  | C | G | C | S    | intronic   | TBX21      | NA       | NA                         |
| 12924 | 17 | 50983799  | 50983799  | T | A | T | W    | intergenic | NA         | NA       | NA                         |
| 12924 | 17 | 53627666  | 53627666  | C | A | C | M    | intronic   | EPX        | NA       | NA                         |
| 12924 | 17 | 55487620  | 55487620  | C | A | C | M    | intronic   | HEATR6     | NA       | NA                         |
| 12924 | 17 | 69797488  | 69797488  | C | G | C | S    | intronic   | DNAI2      | NA       | NA                         |
| 12924 | 17 | 69817009  | 69817009  | G | T | G | K    | exonic     | DNAI2      | missense | NM_001172810:p.D412Y       |

|       |    |          |          |   |   |   |      |            |           |          |                         |
|-------|----|----------|----------|---|---|---|------|------------|-----------|----------|-------------------------|
| 12924 | 17 | 70427668 | 70427668 | G | A | G | R    | exonic     | USH1G     | silent   | NM_173477:p.A286A       |
| 12924 | 18 | 4681573  | 4681573  | C | A | C | M    | intergenic | NA        | NA       | NA                      |
| 12924 | 18 | 4681574  | 4681574  | A | T | A | W    | intergenic | NA        | NA       | NA                      |
| 12924 | 18 | 7070396  | 7070396  | C | T | C | Y    | exonic     | LAMA1     | missense | NM_005559:p.C41Y        |
| 12924 | 18 | 12065312 | 12065312 | C | A | C | M    | intergenic | NA        | NA       | NA                      |
| 12924 | 18 | 14620849 | 14620849 | G | C | G | S    | intergenic | NA        | NA       | NA                      |
| 12924 | 18 | 14786268 | 14786268 | T | A | T | W    | intronic   | ANKRD30B  | NA       | NA                      |
| 12924 | 18 | 15316010 | 15316010 | C | A | C | M    | upstream   | LOC644669 | NA       | NA                      |
| 12924 | 18 | 26927510 | 26927510 | G | A | G | R    | intronic   | DSC2      | NA       | NA                      |
| 12924 | 18 | 30652190 | 30652190 | C | G | C | S    | exonic     | DTNA      | missense | NM_001128175:p.C258W    |
| 12924 | 18 | 41573715 | 41573715 | C | G | C | S    | intronic   | SLC14A1   | NA       | NA                      |
| 12924 | 18 | 43820733 | 43820733 | C | A | C | M    | exonic     | ZBTB7C    | missense | NM_001039360:p.L248F    |
| 12924 | 18 | 64096570 | 64096570 | C | T | C | Y    | intergenic | NA        | NA       | NA                      |
| 12924 | 18 | 67044502 | 67044502 | G | T | G | K    | intergenic | NA        | NA       | NA                      |
| 12924 | 18 | 68356874 | 68356874 | G | T | G | K    | exonic     | CBLN2     | silent   | NM_182511:p.T157T       |
| 12924 | 18 | 71126631 | 71126631 | G | T | G | K    | exonic     | TSHZ1     | missense | NM_005786:p.R49L        |
| 12924 | 18 | 71127923 | 71127923 | G | T | G | K    | exonic     | TSHZ1     | nonsense | NM_005786:p.E480X       |
| 12924 | 18 | 73091936 | 73091936 | G | T | G | K    | exonic     | GALR1     | silent   | NM_001480:p.V148V       |
| 12924 | 19 | 3930985  | 3930985  | C | G | C | S    | exonic     | EEF2      | missense | NM_001961:p.D476H       |
| 12924 | 19 | 6630508  | 6630508  | C | A | C | M    | splicing   | C3        | NA       | NA                      |
| 12924 | 19 | 9054838  | 9054838  | T | A | T | W    | intergenic | NA        | NA       | NA                      |
| 12924 | 19 | 10471422 | 10471422 | G | C | G | S    | exonic     | KEAP1     | missense | NM_012289:p.H96Q        |
| 12924 | 19 | 11624074 | 11624074 | C | T | C | Y    | intergenic | NA        | NA       | NA                      |
| 12924 | 19 | 12619281 | 12619281 | G | T | G | K    | exonic     | MAN2B1    | missense | NM_000528:p.S932R       |
| 12924 | 19 | 12647319 | 12647319 | C | G | C | S    | intronic   | WDR83     | NA       | NA                      |
| 12924 | 19 | 15512319 | 15512319 | C | A | C | M    | exonic     | CYP4F22   | missense | NM_173483:p.Q244K       |
| 12924 | 19 | 15962161 | 15962161 | C | T | C | Y    | intergenic | NA        | NA       | NA                      |
| 12924 | 19 | 18761034 | 18761034 | G | T | G | K    | exonic     | COMP      | missense | NM_000095:p.P155T       |
| 12924 | 19 | 19232687 | 19232687 | C | T | C | Y    | exonic     | HAPLN4    | missense | NM_023002:p.R140H       |
| 12924 | 19 | 19807219 | 19807219 | G | T | G | K    | intergenic | NA        | NA       | NA                      |
| 12924 | 19 | 22659937 | 22659937 | G | T | G | K    | intergenic | NA        | NA       | NA                      |
| 12924 | 19 | 23628706 | 23628706 | C | A | C | M    | exonic     | ZNF675    | missense | NM_138330:p.G290V       |
| 12924 | 19 | 23628707 | 23628707 | C | A | C | M    | exonic     | ZNF675    | missense | NM_138330:p.G290C       |
| 12924 | 19 | 40849551 | 40849551 | G | C | G | S    | upstream   | UPK1A     | NA       | NA                      |
| 12924 | 19 | 43779504 | 43779504 | A | C | A | M    | intronic   | MAP4K1    | NA       | NA                      |
| 12924 | 19 | 45700195 | 45700195 | G | T | G | K    | exonic     | SPTBN4    | missense | NM_020971:p.A382S       |
| 12924 | 19 | 47184390 | 47184390 | G | A | G | R    | intronic   | ATP1A3    | NA       | NA                      |
| 12924 | 19 | 48103881 | 48103881 | C | A | C | M    | intronic   | PSG6      | NA       | NA                      |
| 12924 | 19 | 48271296 | 48271296 | T | C | T | Y    | intronic   | PSG2      | NA       | NA                      |
| 12924 | 19 | 49425820 | 49425820 | T | C | T | Y    | intronic   | ZNF227    | NA       | NA                      |
| 12924 | 19 | 53229381 | 53229381 | G | T | G | K    | exonic     | CABP5     | silent   | NM_019855:p.A133A       |
| 12924 | 19 | 54723532 | 54723532 | C | T | C | Y    | UTR5       | RCN3      | NA       | NA                      |
| 12924 | 19 | 55989586 | 55989586 | C | - | G | */-C | exonic     | ACPT      | FS_del   | NM_033068:c.922_922delC |
| 12924 | 19 | 56822517 | 56822517 | G | T | G | K    | intronic   | SIGLEC5   | NA       | NA                      |
| 12924 | 19 | 58360997 | 58360997 | G | A | G | R    | exonic     | ZNF665    | silent   | NM_024733:p.V186V       |
| 12924 | 19 | 59417905 | 59417905 | G | T | G | K    | intronic   | LILRB3    | NA       | NA                      |
| 12924 | 19 | 59451800 | 59451800 | C | A | C | M    | exonic     | LILRB5    | missense | NM_006840:p.W191C       |
| 12924 | 19 | 59474020 | 59474020 | T | A | T | W    | exonic     | LILRB2    | silent   | NM_005874:p.S388S       |
| 12924 | 19 | 59567834 | 59567834 | - | A | G | */+A | intronic   | LAIR1     | NA       | NA                      |
| 12924 | 19 | 59798780 | 59798780 | G | C | G | S    | intronic   | LILRA1    | NA       | NA                      |
| 12924 | 19 | 61394027 | 61394027 | T | A | T | W    | exonic     | ZSCAN5B   | nonsense | NM_001080456:p.K244X    |
| 12924 | 19 | 62438599 | 62438599 | C | A | C | M    | UTR3       | AURKC     | NA       | NA                      |
| 12924 | 19 | 63497398 | 63497398 | G | T | G | K    | exonic     | ZNF8      | missense | NM_021089:p.G138W       |
| 12924 | 20 | 2359613  | 2359613  | T | A | T | W    | exonic     | TGM6      | missense | NM_198994:p.V636E       |
| 12924 | 20 | 2724218  | 2724218  | G | A | G | R    | intronic   | CPXM1     | NA       | NA                      |
| 12924 | 20 | 3216517  | 3216517  | - | C | A | */+C | intronic   | C20orf194 | NA       | NA                      |
| 12924 | 20 | 3632037  | 3632037  | G | T | G | K    | exonic     | SIGLEC1   | silent   | NM_023068:p.V345V       |
| 12924 | 20 | 24942664 | 24942664 | G | T | G | K    | exonic     | ACSS1     | missense | NM_032501:p.A462E       |
| 12924 | 20 | 25005005 | 25005005 | G | T | G | K    | exonic     | VSX1      | missense | NM_014588:p.S330R       |
| 12924 | 20 | 25028099 | 25028099 | A | T | A | W    | intergenic | NA        | NA       | NA                      |
| 12924 | 20 | 32567892 | 32567892 | G | T | G | K    | UTR5       | DYNLRB1   | NA       | NA                      |
| 12924 | 20 | 33929861 | 33929861 | A | G | A | R    | intronic   | PHF20     | NA       | NA                      |
| 12924 | 20 | 34493939 | 34493939 | C | - | G | */-C | exonic     | DLGAP4    | FS_del   | NM_014902:c.405_405delC |
| 12924 | 20 | 36388015 | 36388015 | G | T | G | K    | intronic   | BPI       | NA       | NA                      |
| 12924 | 20 | 36601946 | 36601946 | C | G | C | S    | exonic     | RALGAPB   | silent   | NM_020336:p.S831S       |
| 12924 | 20 | 40059380 | 40059380 | C | A | C | M    | intergenic | NA        | NA       | NA                      |
| 12924 | 20 | 46565587 | 46565587 | C | G | C | S    | intergenic | NA        | NA       | NA                      |
| 12924 | 20 | 47297294 | 47297294 | C | T | C | Y    | exonic     | ZNFX1     | missense | NM_021035:p.E1892K      |
| 12924 | 20 | 51305004 | 51305004 | G | T | G | K    | exonic     | TSHZ2     | missense | NM_173485:p.G534W       |
| 12924 | 20 | 54257266 | 54257266 | C | T | C | Y    | UTR5       | MC3R      | NA       | NA                      |
| 12924 | 20 | 59918890 | 59918890 | C | A | C | M    | exonic     | CDH4      | silent   | NM_001794:p.P402P       |
| 12924 | 20 | 60773641 | 60773641 | C | T | C | Y    | exonic     | SLCO4A1   | missense | NM_016354:p.S707F       |
| 12924 | 21 | 9724484  | 9724484  | A | G | A | R    | intergenic | NA        | NA       | NA                      |
| 12924 | 21 | 9736337  | 9736337  | A | G | A | R    | intergenic | NA        | NA       | NA                      |
| 12924 | 21 | 9736347  | 9736347  | C | A | C | M    | intergenic | NA        | NA       | NA                      |
| 12924 | 21 | 9741400  | 9741400  | C | T | C | Y    | intergenic | NA        | NA       | NA                      |
| 12924 | 21 | 9743983  | 9743983  | C | T | C | Y    | intergenic | NA        | NA       | NA                      |
| 12924 | 21 | 13935567 | 13935567 | C | A | C | M    | exonic     | POTED     | missense | NM_174981:p.L522I       |
| 12924 | 21 | 13970313 | 13970313 | G | T | G | K    | intergenic | NA        | NA       | NA                      |

|       |    |           |           |   |   |   |      |             |            |          |                      |
|-------|----|-----------|-----------|---|---|---|------|-------------|------------|----------|----------------------|
| 12924 | 21 | 23703003  | 23703003  | G | A | G | R    | intergenic  | NA         | NA       | NA                   |
| 12924 | 21 | 27224160  | 27224160  | G | T | G | K    | exonic      | ADAMTS5    | nonsense | NM_007038:p.S714X    |
| 12924 | 21 | 27237563  | 27237563  | T | C | T | Y    | intronic    | ADAMTS5    | NA       | NA                   |
| 12924 | 21 | 29988007  | 29988007  | G | - | A | */-G | intronic    | GRIK1      | NA       | NA                   |
| 12924 | 21 | 30719613  | 30719613  | A | C | A | M    | exonic      | KRTAP13-3  | nonsense | NM_181622:p.Y163X    |
| 12924 | 21 | 31041262  | 31041262  | C | A | C | M    | exonic      | KRTAP21-2  | nonsense | NM_181617:p.G44X     |
| 12924 | 21 | 32960303  | 32960303  | C | G | C | S    | exonic      | SYN1       | missense | NM_001160306:p.D651H |
| 12924 | 21 | 36425261  | 36425261  | A | T | A | W    | intergenic  | NA         | NA       | NA                   |
| 12924 | 21 | 43774123  | 43774123  | C | T | C | Y    | exonic      | HSF2BP     | missense | NM_007031:p.R315H    |
| 12924 | 21 | 44212356  | 44212356  | C | A | C | M    | exonic      | AGPAT3     | missense | NM_001037553:p.L94I  |
| 12924 | 21 | 44662343  | 44662343  | C | T | C | Y    | exonic      | TRPM2      | silent   | NM_003307:p.F1084F   |
| 12924 | 21 | 44824720  | 44824720  | G | T | G | K    | exonic      | KRTAP10-5  | missense | NM_198694:p.A55D     |
| 12924 | 22 | 15452999  | 15452999  | G | T | G | K    | exonic      | CCT8L2     | missense | NM_014406:p.P148T    |
| 12924 | 22 | 20367502  | 20367502  | C | T | C | Y    | exonic      | PPI2L      | missense | NM_148176:p.S170F    |
| 12924 | 22 | 20994466  | 20994466  | C | G | C | S    | ncRNA       | LOC96610   | NA       | NA                   |
| 12924 | 22 | 29628356  | 29628356  | G | T | G | K    | intronic    | OSBP2      | NA       | NA                   |
| 12924 | 22 | 36658674  | 36658674  | G | T | G | K    | intronic    | MICALL1    | NA       | NA                   |
| 12924 | 22 | 39079039  | 39079039  | G | T | G | K    | exonic      | ADSL       | missense | NM_001123378:p.R125I |
| 12924 | 22 | 39135386  | 39135386  | G | A | G | R    | intronic    | SGSM3      | NA       | NA                   |
| 12924 | 22 | 40082417  | 40082417  | G | T | G | K    | exonic      | ZC3H7B     | silent   | NM_017590:p.A836A    |
| 12924 | 22 | 49062422  | 49062422  | G | T | G | K    | exonic      | PLXNB2     | silent   | NM_012401:p.L1111L   |
| 12924 | X  | 16080634  | 16080634  | C | G | C | S    | exonic      | GRPR       | missense | NM_005314:p.S367C    |
| 12924 | X  | 18876904  | 18876904  | C | A | C | M    | intronic    | PHKA2      | NA       | NA                   |
| 12924 | X  | 36072955  | 36072955  | G | T | G | K    | UTR3        | CXorf59    | NA       | NA                   |
| 12924 | X  | 41087939  | 41087939  | G | T | G | K    | exonic      | DDX3X      | nonsense | NM_001193416:p.G229X |
| 12924 | X  | 46954012  | 46954012  | A | T | A | W    | exonic      | UBA1       | missense | NM_003334:p.N662I    |
| 12924 | X  | 48535784  | 48535784  | C | A | C | M    | exonic      | GATA1      | missense | NM_002049:p.Q237K    |
| 12924 | X  | 48535785  | 48535785  | A | G | A | R    | exonic      | GATA1      | missense | NM_002049:p.Q237R    |
| 12924 | X  | 52657364  | 52657364  | C | A | C | M    | intergenic  | NA         | NA       | NA                   |
| 12924 | X  | 54803020  | 54803020  | G | T | G | K    | exonic      | ITIH5L     | silent   | NM_198510:p.S323S    |
| 12924 | X  | 54803021  | 54803021  | G | T | G | K    | exonic      | ITIH5L     | missense | NM_198510:p.S323Y    |
| 12924 | X  | 54992182  | 54992182  | C | A | C | M    | intronic    | PFKFB1     | NA       | NA                   |
| 12924 | X  | 55676285  | 55676285  | G | C | G | S    | intergenic  | NA         | NA       | NA                   |
| 12924 | X  | 65212380  | 65212380  | G | A | G | R    | intergenic  | NA         | NA       | NA                   |
| 12924 | X  | 70389164  | 70389164  | C | A | C | M    | splicing    | ZMYM3      | nonsense | NM_001171163:p.G223X |
| 12924 | X  | 72350886  | 72350886  | C | T | C | Y    | exonic      | NAP1L2     | silent   | NM_021963:p.G56G     |
| 12924 | X  | 79859717  | 79859717  | T | A | T | W    | intronic    | BRWD3      | NA       | NA                   |
| 12924 | X  | 83014789  | 83014789  | A | T | A | W    | exonic      | CYLC1      | silent   | NM_021118:p.A139A    |
| 12924 | X  | 83258801  | 83258801  | C | G | C | S    | exonic      | RPS6KA6    | missense | NM_014496:p.G291A    |
| 12924 | X  | 111511395 | 111511395 | G | C | G | S    | UTR5        | ZCCHC16    | NA       | NA                   |
| 12924 | X  | 113529793 | 113529793 | G | T | G | K    | intergenic  | NA         | NA       | NA                   |
| 12924 | X  | 114154545 | 114154545 | T | A | T | W    | intronic    | IL13RA2    | NA       | NA                   |
| 12924 | X  | 129012516 | 129012516 | C | A | C | M    | intronic    | BCORL1     | NA       | NA                   |
| 12924 | X  | 129346408 | 129346408 | C | T | C | Y    | exonic      | GPR119     | missense | NM_178471:p.G232E    |
| 12924 | X  | 133984040 | 133984040 | C | T | C | Y    | exonic      | FAM127C    | missense | NM_001078173:p.R39Q  |
| 12924 | X  | 134601998 | 134601998 | T | G | T | K    | intergenic  | NA         | NA       | NA                   |
| 12924 | X  | 135701606 | 135701606 | G | T | G | K    | intergenic  | NA         | NA       | NA                   |
| 12924 | X  | 141118612 | 141118612 | T | G | T | K    | exonic      | MAGEC2     | missense | NM_016249:p.K276N    |
| 12924 | X  | 146120131 | 146120131 | C | A | C | M    | upstream;do | MIR506     | NA       | NA                   |
| 12924 | X  | 153388977 | 153388977 | C | A | C | M    | exonic      | FAM3A      | nonsense | NM_001171133:p.E104X |
| 12924 | Y  | 8204690   | 8204690   | C | G | C | S    | intergenic  | NA         | NA       | NA                   |
| 12924 | Y  | 10594641  | 10594641  | G | A | G | R    | intergenic  | NA         | NA       | NA                   |
| 12924 | Y  | 12033052  | 12033052  | A | T | A | W    | intergenic  | NA         | NA       | NA                   |
| 12924 | Y  | 12154834  | 12154834  | A | G | A | R    | intergenic  | NA         | NA       | NA                   |
| 12924 | Y  | 12154839  | 12154839  | C | A | C | M    | intergenic  | NA         | NA       | NA                   |
| 12924 | Y  | 12602732  | 12602732  | G | T | G | K    | intergenic  | NA         | NA       | NA                   |
| 12924 | M  | 15052     | 15052     | T | C | T | Y    | upstream    | MIR1974    | NA       | NA                   |
| 13280 | 1  | 2609387   | 2609387   | C | A | C | M    | intergenic  | NA         | NA       | NA                   |
| 13280 | 1  | 3639260   | 3639260   | C | T | C | Y    | exonic      | TP73       | silent   | NM_001126240:p.T507T |
| 13280 | 1  | 20699731  | 20699731  | A | C | A | M    | UTR3        | MUL1       | NA       | NA                   |
| 13280 | 1  | 20912629  | 20912629  | C | G | C | S    | exonic      | KIF17      | missense | NM_001122819:p.E129Q |
| 13280 | 1  | 31210266  | 31210266  | C | A | C | M    | exonic      | PUM1       | missense | NM_014676:p.S722I    |
| 13280 | 1  | 31210269  | 31210269  | G | A | G | R    | exonic      | PUM1       | missense | NM_014676:p.S721L    |
| 13280 | 1  | 35142875  | 35142875  | G | T | G | K    | exonic      | DLGAP3     | missense | NM_001080418:p.H233N |
| 13280 | 1  | 42976740  | 42976740  | G | T | G | K    | exonic      | CLDN19     | missense | NM_001185117:p.D109E |
| 13280 | 1  | 52061820  | 52061820  | A | T | A | W    | intronic    | NRD1       | NA       | NA                   |
| 13280 | 1  | 71645761  | 71645761  | A | T | A | W    | exonic      | NEGR1      | missense | NM_173808:p.S341T    |
| 13280 | 1  | 75452082  | 75452082  | A | G | A | R    | intronic    | SLC44A5    | NA       | NA                   |
| 13280 | 1  | 75452968  | 75452968  | C | G | C | S    | intronic    | SLC44A5    | NA       | NA                   |
| 13280 | 1  | 93374877  | 93374877  | T | C | T | Y    | exonic      | MTF2       | missense | NM_001164392:p.L439S |
| 13280 | 1  | 94259875  | 94259875  | C | A | C | M    | intronic    | ABCA4      | NA       | NA                   |
| 13280 | 1  | 94270130  | 94270130  | C | G | C | S    | exonic      | ABCA4      | missense | NM_000350:p.R1307T   |
| 13280 | 1  | 99191312  | 99191312  | C | T | C | Y    | exonic      | LPFR5      | missense | NM_001010861:p.E175K |
| 13280 | 1  | 99246382  | 99246382  | T | G | T | K    | ncRNA       | LOC1001296 | NA       | NA                   |
| 13280 | 1  | 109285619 | 109285619 | C | T | C | Y    | exonic      | CLCC1      | missense | NM_015127:p.E193K    |
| 13280 | 1  | 148953283 | 148953283 | C | G | C | S    | intronic    | HORMAD1    | NA       | NA                   |
| 13280 | 1  | 148953757 | 148953757 | C | G | C | S    | exonic      | HORMAD1    | missense | NM_032132:p.R67T     |
| 13280 | 1  | 152995105 | 152995105 | C | G | C | S    | intronic    | KCNN3      | NA       | NA                   |
| 13280 | 1  | 153280704 | 153280704 | C | T | C | Y    | exonic      | DCST1      | missense | NM_152494:p.N247Y    |

|       |   |           |           |   |   |   |      |            |           |          |                           |
|-------|---|-----------|-----------|---|---|---|------|------------|-----------|----------|---------------------------|
| 13280 | 1 | 153451143 | 153451143 | C | A | C | M    | ncRNA      | GBAP1     | NA       | NA                        |
| 13280 | 1 | 154831952 | 154831952 | C | T | C | Y    | exonic     | GPATCH4   | missense | NM_015590:p.E269K         |
| 13280 | 1 | 157180366 | 157180366 | A | G | A | R    | exonic     | PYHIN1    | missense | NM_198929:p.M389V         |
| 13280 | 1 | 158518873 | 158518873 | C | A | C | M    | exonic     | PEX19     | missense | NM_002857:p.K130N         |
| 13280 | 1 | 158655694 | 158655694 | C | T | C | Y    | exonic     | VANGL2    | silent   | NM_020335:p.L157L         |
| 13280 | 1 | 175006868 | 175006868 | G | - | T | */-G | exonic     | PAPPA2    | FS_del   | NM_020318:c.4644_4644delG |
| 13280 | 1 | 177307680 | 177307680 | G | T | G | K    | exonic     | FAM20B    | silent   | NM_014864:p.V336V         |
| 13280 | 1 | 178507237 | 178507237 | G | A | G | R    | exonic     | LHX4      | missense | NM_033343:p.R184Q         |
| 13280 | 1 | 181117302 | 181117302 | A | G | A | R    | exonic     | DHX9      | missense | NM_001357:p.I937M         |
| 13280 | 1 | 183410883 | 183410883 | A | T | A | W    | intronic   | C1orf26   | NA       | NA                        |
| 13280 | 1 | 188517414 | 188517414 | C | T | C | Y    | exonic     | FAM5C     | missense | NM_199051:p.R109H         |
| 13280 | 1 | 195580164 | 195580164 | C | A | C | M    | exonic     | CRB1      | silent   | NM_201253:p.L261L         |
| 13280 | 1 | 209100382 | 209100382 | C | A | C | M    | intronic   | KCNH1     | NA       | NA                        |
| 13280 | 1 | 214917269 | 214917269 | G | A | G | R    | exonic     | ESRRG     | missense | NM_001438:p.P82S          |
| 13280 | 1 | 222566087 | 222566087 | G | - | A | */-G | intronic   | NVL       | NA       | NA                        |
| 13280 | 1 | 226399860 | 226399860 | G | A | G | R    | exonic     | GUK1      | silent   | NM_000858:p.V8V           |
| 13280 | 1 | 240330685 | 240330685 | T | C | T | Y    | exonic     | PLD5      | missense | NM_152666:p.E329G         |
| 13280 | 1 | 245080083 | 245080083 | C | G | C | S    | exonic     | AHCTF1    | missense | NM_015446:p.E1959Q        |
| 13280 | 1 | 245080115 | 245080115 | C | G | C | S    | exonic     | AHCTF1    | missense | NM_015446:p.R1948T        |
| 13280 | 1 | 245460639 | 245460639 | G | C | G | S    | intergenic | NA        | NA       | NA                        |
| 13280 | 1 | 245655537 | 245655537 | G | T | G | K    | intronic   | NLRP3     | NA       | NA                        |
| 13280 | 1 | 246071303 | 246071303 | C | G | C | S    | exonic     | OR11L1    | missense | NM_001001959:p.Q173H      |
| 13280 | 1 | 246592117 | 246592117 | G | T | G | K    | exonic     | OR2T4     | silent   | NM_001004696:p.R204R      |
| 13280 | 2 | 8794421   | 8794421   | C | G | C | S    | intronic   | KIDINS220 | NA       | NA                        |
| 13280 | 2 | 27599042  | 27599042  | G | A | G | R    | intronic   | GCKR      | NA       | NA                        |
| 13280 | 2 | 29460306  | 29460306  | C | A | C | M    | intronic   | ALK       | NA       | NA                        |
| 13280 | 2 | 29996425  | 29996425  | C | A | C | M    | exonic     | ALK       | missense | NM_004304:p.G202V         |
| 13280 | 2 | 31901701  | 31901701  | C | T | C | Y    | intergenic | NA        | NA       | NA                        |
| 13280 | 2 | 33425902  | 33425902  | G | C | G | S    | intronic   | LTBP1     | NA       | NA                        |
| 13280 | 2 | 36823862  | 36823862  | G | T | G | K    | exonic     | VIT       | silent   | NM_001177971:p.V78V       |
| 13280 | 2 | 39115934  | 39115934  | C | G | C | S    | exonic     | SOS1      | missense | NM_005633:p.E333Q         |
| 13280 | 2 | 40220027  | 40220027  | C | G | C | S    | intronic   | SLC8A1    | NA       | NA                        |
| 13280 | 2 | 41931104  | 41931104  | G | A | G | R    | intergenic | NA        | NA       | NA                        |
| 13280 | 2 | 45022962  | 45022962  | C | T | C | Y    | exonic     | SIX3      | missense | NM_005413:p.A72V          |
| 13280 | 2 | 48662902  | 48662902  | A | G | A | R    | exonic     | STON1     | silent   | NM_006873:p.E542E         |
| 13280 | 2 | 58164708  | 58164708  | T | C | T | Y    | intronic   | VRK2      | NA       | NA                        |
| 13280 | 2 | 61670260  | 61670260  | C | A | C | M    | intergenic | NA        | NA       | NA                        |
| 13280 | 2 | 64175776  | 64175776  | T | C | T | Y    | exonic     | PEL1      | missense | NM_020651:p.E274G         |
| 13280 | 2 | 65150359  | 65150359  | G | A | G | R    | exonic     | CEP68     | missense | NM_015147:p.E93K          |
| 13280 | 2 | 65150368  | 65150368  | G | C | G | S    | exonic     | CEP68     | missense | NM_015147:p.E96Q          |
| 13280 | 2 | 74609738  | 74609738  | G | T | G | K    | intronic   | AUP1      | NA       | NA                        |
| 13280 | 2 | 79239162  | 79239162  | T | C | T | Y    | intronic   | REG3A     | NA       | NA                        |
| 13280 | 2 | 84858731  | 84858731  | T | A | T | W    | intronic   | DNAH6     | NA       | NA                        |
| 13280 | 2 | 86179376  | 86179376  | G | C | G | S    | exonic     | POLR1A    | missense | NM_015425:p.R101G         |
| 13280 | 2 | 88780674  | 88780674  | G | A | G | R    | exonic     | RPIA      | missense | NM_144563:p.V127I         |
| 13280 | 2 | 90961703  | 90961703  | G | T | G | K    | intergenic | NA        | NA       | NA                        |
| 13280 | 2 | 98821013  | 98821013  | C | G | C | S    | splicing   | C2orf55   | NA       | NA                        |
| 13280 | 2 | 105258550 | 105258550 | G | C | G | S    | exonic     | TGFBRAP1  | missense | NM_001142621:p.R522G      |
| 13280 | 2 | 108260071 | 108260071 | G | C | G | S    | intergenic | NA        | NA       | NA                        |
| 13280 | 2 | 132578256 | 132578256 | C | A | C | M    | intergenic | NA        | NA       | NA                        |
| 13280 | 2 | 141175936 | 141175936 | A | T | A | W    | intronic   | LRP1B     | NA       | NA                        |
| 13280 | 2 | 144879021 | 144879021 | A | G | A | R    | exonic     | ZEB2      | silent   | NM_014795:p.F148F         |
| 13280 | 2 | 162583965 | 162583965 | G | A | G | R    | intronic   | DPP4      | NA       | NA                        |
| 13280 | 2 | 179323204 | 179323204 | T | A | T | W    | exonic     | TTN       | missense | NM_133379:p.E4056D        |
| 13280 | 2 | 184180588 | 184180588 | A | T | A | W    | intergenic | NA        | NA       | NA                        |
| 13280 | 2 | 190490552 | 190490552 | G | T | G | K    | intergenic | NA        | NA       | NA                        |
| 13280 | 2 | 196457681 | 196457681 | C | G | C | S    | exonic     | DNAH7     | missense | NM_018897:p.S1879T        |
| 13280 | 2 | 200233437 | 200233437 | G | A | G | R    | intergenic | NA        | NA       | NA                        |
| 13280 | 2 | 201178480 | 201178480 | T | G | T | K    | intronic   | AOX1      | NA       | NA                        |
| 13280 | 2 | 203469222 | 203469222 | T | A | T | W    | intronic   | WDR12     | NA       | NA                        |
| 13280 | 2 | 206983283 | 206983283 | C | A | C | M    | intergenic | NA        | NA       | NA                        |
| 13280 | 2 | 211956900 | 211956900 | A | T | A | W    | exonic     | ERBB4     | missense | NM_005235:p.N1204K        |
| 13280 | 2 | 211959791 | 211959791 | A | C | A | M    | intronic   | ERBB4     | NA       | NA                        |
| 13280 | 2 | 215956475 | 215956475 | C | G | C | S    | intronic   | FN1       | NA       | NA                        |
| 13280 | 2 | 219598947 | 219598947 | C | A | C | M    | intronic   | CCDC108   | NA       | NA                        |
| 13280 | 2 | 221998980 | 221998980 | T | A | T | W    | UTR3       | EPHA4     | NA       | NA                        |
| 13280 | 2 | 227939019 | 227939019 | G | T | G | K    | intronic   | TM4SF20   | NA       | NA                        |
| 13280 | 2 | 233464435 | 233464435 | C | G | C | S    | exonic     | NGEF      | missense | NM_001114090:p.E291D      |
| 13280 | 3 | 634572    | 634572    | A | G | A | R    | intergenic | NA        | NA       | NA                        |
| 13280 | 3 | 15588219  | 15588219  | G | T | G | K    | exonic     | HACL1     | missense | NM_012260:p.T352N         |
| 13280 | 3 | 15617957  | 15617957  | G | T | G | K    | exonic     | HACL1     | missense | NM_012260:p.F6L           |
| 13280 | 3 | 32907330  | 32907330  | C | G | C | S    | exonic     | TRIM71    | missense | NM_001039111:p.Q544E      |
| 13280 | 3 | 42656287  | 42656287  | C | G | C | S    | intronic   | NKTR      | NA       | NA                        |
| 13280 | 3 | 49338155  | 49338155  | C | - | A | */-C | splicing   | USP4      | NA       | NA                        |
| 13280 | 3 | 50120790  | 50120790  | G | A | G | R    | intronic   | RBM5      | NA       | NA                        |
| 13280 | 3 | 69130003  | 69130003  | G | T | G | K    | intronic   | C3orf64   | NA       | NA                        |
| 13280 | 3 | 74399116  | 74399116  | T | C | T | Y    | exonic     | CNTN3     | silent   | NM_020872:p.T936T         |
| 13280 | 3 | 75785398  | 75785398  | T | G | T | K    | intergenic | NA        | NA       | NA                        |
| 13280 | 3 | 87762376  | 87762376  | C | G | C | S    | intergenic | NA        | NA       | NA                        |

|       |   |           |           |   |   |   |      |            |           |          |                         |  |
|-------|---|-----------|-----------|---|---|---|------|------------|-----------|----------|-------------------------|--|
| 13280 | 3 | 95296488  | 95296488  | A | C | A | M    | intronic   | NSUN3     | NA       | NA                      |  |
| 13280 | 3 | 96857071  | 96857071  | C | T | C | Y    | intergenic | NA        | NA       | NA                      |  |
| 13280 | 3 | 114648157 | 114648157 | C | A | C | M    | exonic     | SPICE1    | missense | NM_144718:p.G828V       |  |
| 13280 | 3 | 116132703 | 116132703 | G | A | G | R    | UTR5       | ZBTB20    | NA       | NA                      |  |
| 13280 | 3 | 125527573 | 125527573 | C | T | C | Y    | exonic     | KALRN     | silent   | NM_001024660:p.A381A    |  |
| 13280 | 3 | 128823195 | 128823195 | G | T | G | K    | splicing   | MCM2      | NA       | NA                      |  |
| 13280 | 3 | 130721560 | 130721560 | C | T | C | Y    | intronic   | IFT122    | NA       | NA                      |  |
| 13280 | 3 | 130787518 | 130787518 | C | T | C | Y    | exonic     | PLXND1    | silent   | NM_015103:p.L606L       |  |
| 13280 | 3 | 137452053 | 137452053 | G | A | G | R    | exonic     | PCCB      | missense | NM_000532:p.G49E        |  |
| 13280 | 3 | 139598894 | 139598894 | C | T | C | Y    | exonic     | MRAS      | missense | NM_001085049:p.R78W     |  |
| 13280 | 3 | 139663636 | 139663636 | A | G | A | R    | exonic     | ESYT3     | silent   | NM_031913:p.L271L       |  |
| 13280 | 3 | 160026556 | 160026556 | G | T | G | K    | intronic   | MFSD1     | NA       | NA                      |  |
| 13280 | 3 | 171133017 | 171133017 | A | T | A | W    | intronic   | SAMD7     | NA       | NA                      |  |
| 13280 | 3 | 180803106 | 180803106 | C | G | C | S    | intronic   | MRPL47    | NA       | NA                      |  |
| 13280 | 3 | 183661131 | 183661131 | G | C | G | S    | intergenic | NA        | NA       | NA                      |  |
| 13280 | 3 | 190190142 | 190190142 | C | T | C | Y    | intergenic | NA        | NA       | NA                      |  |
| 13280 | 3 | 190190164 | 190190164 | A | C | A | M    | intergenic | NA        | NA       | NA                      |  |
| 13280 | 3 | 194564733 | 194564733 | G | T | G | K    | exonic     | ATP13A5   | silent   | NM_198505:p.R32R        |  |
| 13280 | 3 | 198039803 | 198039803 | A | G | A | R    | UTR3       | PAK2      | NA       | NA                      |  |
| 13280 | 4 | 2899686   | 2899686   | C | G | C | S    | intronic   | ADD1      | NA       | NA                      |  |
| 13280 | 4 | 3210222   | 3210222   | C | G | C | S    | intronic   | HTT       | NA       | NA                      |  |
| 13280 | 4 | 8995369   | 8995369   | A | G | A | R    | intergenic | NA        | NA       | NA                      |  |
| 13280 | 4 | 8999730   | 8999730   | G | C | G | S    | intergenic | NA        | NA       | NA                      |  |
| 13280 | 4 | 23424814  | 23424814  | T | A | T | W    | exonic     | PPARGC1A  | nonsense | NM_013261:p.K464X       |  |
| 13280 | 4 | 28434168  | 28434168  | C | A | C | M    | intergenic | NA        | NA       | NA                      |  |
| 13280 | 4 | 38475393  | 38475393  | T | C | T | Y    | exonic     | TLR1      | silent   | NM_003263:p.G485G       |  |
| 13280 | 4 | 39085349  | 39085349  | G | A | G | R    | exonic     | KLB       | missense | NM_175737:p.D129N       |  |
| 13280 | 4 | 89650180  | 89650180  | G | A | G | R    | intergenic | NA        | NA       | NA                      |  |
| 13280 | 4 | 119956108 | 119956108 | G | T | G | K    | exonic     | SEC24D    | missense | NM_014822:p.Q207K       |  |
| 13280 | 4 | 123370741 | 123370741 | C | T | C | Y    | exonic     | KIAA1109  | missense | NM_015312:p.A1083V      |  |
| 13280 | 4 | 151739762 | 151739762 | T | C | T | Y    | intronic   | LRBA      | NA       | NA                      |  |
| 13280 | 4 | 175834929 | 175834929 | C | A | C | M    | exonic     | GLRA3     | missense | NM_006529:p.V268F       |  |
| 13280 | 4 | 178497954 | 178497954 | G | A | G | R    | exonic     | NEIL3     | silent   | NM_018248:p.Q217Q       |  |
| 13280 | 4 | 185717565 | 185717565 | C | T | C | Y    | intergenic | NA        | NA       | NA                      |  |
| 13280 | 4 | 189161599 | 189161599 | G | T | G | K    | exonic     | ZFP42     | missense | NM_174900:p.R215L       |  |
| 13280 | 4 | 191184253 | 191184253 | C | A | C | M    | intronic   | FRG2      | NA       | NA                      |  |
| 13280 | 5 | 878334    | 878334    | T | A | T | W    | exonic     | ZDHHC11   | missense | NM_024786:p.K323M       |  |
| 13280 | 5 | 948304    | 948304    | A | T | A | W    | intronic   | TRIP13    | NA       | NA                      |  |
| 13280 | 5 | 14440669  | 14440669  | C | G | C | S    | exonic     | TRIO      | missense | NM_007118:p.F1231L      |  |
| 13280 | 5 | 20340007  | 20340007  | C | A | C | M    | intergenic | NA        | NA       | NA                      |  |
| 13280 | 5 | 23340567  | 23340567  | T | A | T | W    | intergenic | NA        | NA       | NA                      |  |
| 13280 | 5 | 24206822  | 24206822  | C | A | C | M    | intergenic | NA        | NA       | NA                      |  |
| 13280 | 5 | 24206823  | 24206823  | C | A | C | M    | intergenic | NA        | NA       | NA                      |  |
| 13280 | 5 | 25945985  | 25945985  | C | A | C | M    | intergenic | NA        | NA       | NA                      |  |
| 13280 | 5 | 37369295  | 37369295  | C | T | C | Y    | intronic   | NUP155    | NA       | NA                      |  |
| 13280 | 5 | 37369432  | 37369432  | C | G | C | S    | exonic     | NUP155    | missense | NM_153485:p.D470H       |  |
| 13280 | 5 | 37369493  | 37369493  | C | T | C | Y    | splicing   | NUP155    | NA       | NA                      |  |
| 13280 | 5 | 37373686  | 37373686  | C | T | C | Y    | exonic     | NUP155    | missense | NM_153485:p.M446I       |  |
| 13280 | 5 | 37373739  | 37373739  | C | T | C | Y    | exonic     | NUP155    | missense | NM_153485:p.D429N       |  |
| 13280 | 5 | 38993514  | 38993514  | G | A | G | R    | exonic     | RICTOR    | silent   | NM_152756:p.H832H       |  |
| 13280 | 5 | 41417931  | 41417931  | T | C | T | Y    | exonic     | PLCXD3    | missense | NM_001005473:p.Y189C    |  |
| 13280 | 5 | 56651008  | 56651008  | G | C | G | S    | intergenic | NA        | NA       | NA                      |  |
| 13280 | 5 | 76065171  | 76065171  | G | C | G | S    | UTR3       | F2R       | NA       | NA                      |  |
| 13280 | 5 | 76478723  | 76478723  | T | A | T | W    | ncRNA      | LOC728723 | NA       | NA                      |  |
| 13280 | 5 | 108258165 | 108258165 | G | T | G | K    | intronic   | FER       | NA       | NA                      |  |
| 13280 | 5 | 115233571 | 115233571 | G | C | G | S    | intronic   | AP3S1     | NA       | NA                      |  |
| 13280 | 5 | 115348134 | 115348134 | G | C | G | S    | intronic   | AQPEP     | NA       | NA                      |  |
| 13280 | 5 | 121215873 | 121215873 | G | T | G | K    | exonic     | FTMT      | missense | NM_177478:p.V106L       |  |
| 13280 | 5 | 131350490 | 131350490 | C | G | C | S    | intronic   | ACSL6     | NA       | NA                      |  |
| 13280 | 5 | 140208366 | 140208366 | C | G | C | S    | exonic     | PCDHA9    | silent   | NM_031857:p.S34S        |  |
| 13280 | 5 | 140208372 | 140208372 | G | C | G | S    | exonic     | PCDHA9    | silent   | NM_031857:p.P36P        |  |
| 13280 | 5 | 141013735 | 141013735 | G | C | G | S    | exonic     | ARAP3     | missense | NM_022481:p.T1534S      |  |
| 13280 | 5 | 154376759 | 154376759 | G | A | G | R    | exonic     | KIF4B     | silent   | NM_001099293:p.E1049E   |  |
| 13280 | 5 | 154852368 | 154852368 | T | A | T | W    | intergenic | NA        | NA       | NA                      |  |
| 13280 | 5 | 159370413 | 159370413 | G | A | G | R    | exonic     | TTC1      | silent   | NM_003314:p.L100L       |  |
| 13280 | 5 | 178291635 | 178291635 | G | T | G | K    | exonic     | ZFP2      | nonsense | NM_030613:p.E239X       |  |
| 13280 | 6 | 10803267  | 10803267  | C | A | C | M    | exonic     | PAK1IP1   | silent   | NM_017906:p.P21P        |  |
| 13280 | 6 | 27728664  | 27728664  | G | C | G | S    | intergenic | NA        | NA       | NA                      |  |
| 13280 | 6 | 29905728  | 29905728  | C | A | C | M    | intronic   | HLA-G     | NA       | NA                      |  |
| 13280 | 6 | 31848758  | 31848758  | T | A | T | W    | exonic     | C6orf27   | missense | NM_025258:p.S347C       |  |
| 13280 | 6 | 31851899  | 31851899  | C | T | C | Y    | exonic     | C6orf27   | missense | NM_025258:p.A112T       |  |
| 13280 | 6 | 37555944  | 37555944  | G | C | G | S    | UTR3       | FTSJD2    | NA       | NA                      |  |
| 13280 | 6 | 57119898  | 57119898  | C | T | C | Y    | exonic     | ZNF451    | silent   | NM_015555:p.T352T       |  |
| 13280 | 6 | 58554224  | 58554224  | G | A | G | R    | intergenic | NA        | NA       | NA                      |  |
| 13280 | 6 | 64048515  | 64048515  | G | - | T | */-G | exonic     | LGSN      | FS_del   | NM_016571:c.900_900delC |  |
| 13280 | 6 | 70923343  | 70923343  | G | C | G | S    | intronic   | COL19A1   | NA       | NA                      |  |
| 13280 | 6 | 90430930  | 90430930  | G | T | G | K    | exonic     | MDN1      | missense | NM_014611:p.Q4745K      |  |
| 13280 | 6 | 105836362 | 105836362 | G | A | G | R    | exonic     | PREP      | missense | NM_002726:p.T597I       |  |
| 13280 | 6 | 139651396 | 139651396 | C | G | C | S    | exonic     | TXLN8     | missense | NM_153235:p.E112Q       |  |

|       |    |           |           |   |   |   |      |            |           |          |                              |
|-------|----|-----------|-----------|---|---|---|------|------------|-----------|----------|------------------------------|
| 13280 | 6  | 159130429 | 159130429 | T | C | T | Y    | intronic   | EZR       | NA       | NA                           |
| 13280 | 6  | 168188279 | 168188279 | G | T | G | K    | intronic   | KIF25     | NA       | NA                           |
| 13280 | 7  | 683601    | 683601    | A | G | A | R    | intronic   | PRKAR1B   | NA       | NA                           |
| 13280 | 7  | 2222476   | 2222476   | G | A | G | R    | intronic   | MAD1L1    | NA       | NA                           |
| 13280 | 7  | 35175683  | 35175683  | T | A | T | W    | intergenic | NA        | NA       | NA                           |
| 13280 | 7  | 38467426  | 38467426  | A | T | A | W    | exonic     | AMPH      | missense | NM_139316:p.S333R            |
| 13280 | 7  | 57221810  | 57221810  | A | C | A | M    | intergenic | NA        | NA       | NA                           |
| 13280 | 7  | 63239768  | 63239768  | C | A | C | M    | intergenic | NA        | NA       | NA                           |
| 13280 | 7  | 71919040  | 71919040  | C | T | C | Y    | exonic     | TYW1B     | missense | NM_001145440:p.A129T         |
| 13280 | 7  | 73243502  | 73243502  | A | G | A | R    | intronic   | EIF4H     | NA       | NA                           |
| 13280 | 7  | 75797441  | 75797441  | G | T | G | K    | exonic     | YWHAG     | missense | NM_012479:p.L45M             |
| 13280 | 7  | 88802883  | 88802883  | G | T | G | K    | exonic     | ZNF804B   | missense | NM_181646:p.G884V            |
| 13280 | 7  | 100467744 | 100467744 | C | G | C | S    | exonic     | MUC17     | silent   | NM_001040105:p.L2109L        |
| 13280 | 7  | 117219239 | 117219239 | G | T | G | K    | exonic     | CTTNBP2   | missense | NM_033427:p.A416D            |
| 13280 | 7  | 122125234 | 122125234 | C | G | C | S    | exonic     | RNF133    | silent   | NM_139175:p.L325L            |
| 13280 | 7  | 123304181 | 123304181 | G | A | G | R    | exonic     | HYAL4     | silent   | NM_012269:p.A394A            |
| 13280 | 7  | 123304420 | 123304420 | C | T | C | Y    | exonic     | HYAL4     | missense | NM_012269:p.A474V            |
| 13280 | 7  | 130799738 | 130799738 | C | T | C | Y    | intronic   | MKLN1     | NA       | NA                           |
| 13280 | 7  | 137025346 | 137025346 | T | A | T | W    | intronic   | DGKI      | NA       | NA                           |
| 13280 | 7  | 138744921 | 138744921 | G | C | G | S    | exonic     | LUC7L2    | missense | NM_016019:p.E254Q            |
| 13280 | 7  | 140146667 | 140146667 | C | A | C | M    | exonic     | BRAF      | missense | NM_004333:p.G315V            |
| 13280 | 7  | 150186968 | 150186968 | C | A | C | M    | exonic     | ABP1      | missense | NM_001091:p.N585K            |
| 13280 | 7  | 151566799 | 151566799 | G | A | G | R    | exonic     | MLL3      | missense | NM_170606:p.P860S            |
| 13280 | 7  | 151566804 | 151566804 | C | A | C | M    | exonic     | MLL3      | missense | NM_170606:p.W858L            |
| 13280 | 7  | 151918696 | 151918696 | C | A | C | M    | intergenic | NA        | NA       | NA                           |
| 13280 | 7  | 158137879 | 158137879 | C | G | C | S    | exonic     | NCAPG2    | missense | NM_017760:p.G934A            |
| 13280 | 8  | 153191    | 153191    | C | T | C | Y    | ncRNA      | RPL23AP53 | NA       | NA                           |
| 13280 | 8  | 2076228   | 2076228   | C | T | C | Y    | intronic   | MYOM2     | NA       | NA                           |
| 13280 | 8  | 8271638   | 8271638   | G | - | T | */-G | exonic     | SGK223    | FS_del   | NM_001080826:c.1691_1691delC |
| 13280 | 8  | 13925242  | 13925242  | T | C | T | Y    | intergenic | NA        | NA       | NA                           |
| 13280 | 8  | 26777838  | 26777838  | G | A | G | R    | exonic     | ADRA1A    | missense | NM_033303:p.A189V            |
| 13280 | 8  | 29545819  | 29545819  | G | T | G | K    | intergenic | NA        | NA       | NA                           |
| 13280 | 8  | 49044897  | 49044897  | G | T | G | K    | intronic   | MCM4      | NA       | NA                           |
| 13280 | 8  | 52908782  | 52908782  | G | T | G | K    | exonic     | PCMTD1    | missense | NM_052937:p.A144E            |
| 13280 | 8  | 75389915  | 75389915  | C | A | C | M    | exonic     | JPH1      | missense | NM_020647:p.G292V            |
| 13280 | 8  | 87462246  | 87462246  | A | T | A | W    | intronic   | WWP1      | NA       | NA                           |
| 13280 | 8  | 89156080  | 89156080  | C | T | C | Y    | exonic     | MMP16     | nonsense | NM_005941:p.W364X            |
| 13280 | 8  | 92991154  | 92991154  | T | C | T | Y    | intergenic | NA        | NA       | NA                           |
| 13280 | 8  | 96329074  | 96329074  | C | G | C | S    | exonic     | C8orf37   | missense | NM_177965:p.S191R            |
| 13280 | 8  | 110169690 | 110169690 | T | A | T | W    | exonic     | TRHR      | missense | NM_003301:p.V258E            |
| 13280 | 8  | 113306313 | 113306313 | T | A | T | W    | exonic     | CSMD3     | missense | NM_198123:p.T3663S           |
| 13280 | 8  | 113489922 | 113489922 | T | C | T | Y    | intronic   | CSMD3     | NA       | NA                           |
| 13280 | 8  | 118019813 | 118019813 | C | G | C | S    | exonic     | C8orf85   | silent   | NM_001025357:p.L50L          |
| 13280 | 8  | 124264458 | 124264458 | G | A | G | R    | exonic     | FAM83A    | missense | NM_032899:p.D61N             |
| 13280 | 8  | 124371179 | 124371179 | C | G | C | S    | intergenic | NA        | NA       | NA                           |
| 13280 | 8  | 133809323 | 133809323 | G | C | G | S    | exonic     | TMEM71    | missense | NM_144649:p.I174M            |
| 13280 | 8  | 133898989 | 133898989 | A | G | A | R    | intronic   | PHF20L1   | NA       | NA                           |
| 13280 | 8  | 134017134 | 134017134 | A | A | G | R    | intronic   | TG        | NA       | NA                           |
| 13280 | 8  | 139229861 | 139229861 | G | A | G | R    | intronic   | FAM135B   | NA       | NA                           |
| 13280 | 8  | 145590531 | 145590531 | G | A | G | R    | exonic     | CPSF1     | silent   | NM_013291:p.F1205F           |
| 13280 | 9  | 35139264  | 35139264  | C | G | C | S    | intergenic | NA        | NA       | NA                           |
| 13280 | 9  | 36293677  | 36293677  | C | T | C | Y    | intergenic | NA        | NA       | NA                           |
| 13280 | 9  | 37627241  | 37627241  | G | C | G | S    | intergenic | NA        | NA       | NA                           |
| 13280 | 9  | 66576963  | 66576963  | C | T | C | Y    | intergenic | NA        | NA       | NA                           |
| 13280 | 9  | 67910466  | 67910466  | - | T | C | */+T | intergenic | NA        | NA       | NA                           |
| 13280 | 9  | 89462824  | 89462824  | C | T | C | Y    | exonic     | DAPK1     | missense | NM_004938:p.L629F            |
| 13280 | 9  | 91119956  | 91119956  | G | A | G | R    | exonic     | CKS2      | silent   | NM_001827:p.L37L             |
| 13280 | 9  | 92034309  | 92034309  | C | G | C | S    | intergenic | NA        | NA       | NA                           |
| 13280 | 9  | 110703823 | 110703823 | C | G | C | S    | intronic   | IKBKAP    | NA       | NA                           |
| 13280 | 9  | 116435841 | 116435841 | G | T | G | K    | intronic   | C9orf91   | NA       | NA                           |
| 13280 | 9  | 122759412 | 122759412 | C | T | C | Y    | exonic     | C5        | silent   | NM_001735:p.K1578K           |
| 13280 | 9  | 135434062 | 135434062 | G | T | G | K    | exonic     | FAM163B   | missense | NM_001080515:p.G135D         |
| 13280 | 9  | 135667030 | 135667030 | G | C | G | S    | intronic   | VAV2      | NA       | NA                           |
| 13280 | 9  | 137656168 | 137656168 | A | C | A | M    | exonic     | GLT6D1    | missense | NM_182974:p.W143G            |
| 13280 | 9  | 137782699 | 137782699 | G | A | G | R    | exonic     | KCNT1     | missense | NM_020822:p.G142D            |
| 13280 | 9  | 138250473 | 138250473 | G | A | G | R    | exonic     | QSOX2     | missense | NM_181701:p.S320L            |
| 13280 | 10 | 3145640   | 3145640   | G | T | G | K    | exonic     | PFKP      | missense | NM_002627:p.R434L            |
| 13280 | 10 | 12018750  | 12018750  | T | A | T | W    | intronic   | UPF2      | NA       | NA                           |
| 13280 | 10 | 18925191  | 18925191  | T | A | T | W    | exonic     | NSUN6     | silent   | NM_182543:p.A243A            |
| 13280 | 10 | 21137380  | 21137380  | A | G | A | R    | intronic   | NEBL      | NA       | NA                           |
| 13280 | 10 | 25353335  | 25353335  | C | G | C | S    | exonic     | THNSL1    | missense | NM_024838:p.L393V            |
| 13280 | 10 | 37324053  | 37324053  | G | T | G | K    | intergenic | NA        | NA       | NA                           |
| 13280 | 10 | 42025722  | 42025722  | G | T | G | K    | intergenic | NA        | NA       | NA                           |
| 13280 | 10 | 44750328  | 44750328  | C | T | C | Y    | exonic     | TMEM72    | silent   | NM_001123376:p.L190L         |
| 13280 | 10 | 45227665  | 45227665  | G | C | G | S    | exonic     | ALOX5     | missense | NM_000698:p.G151A            |
| 13280 | 10 | 60792275  | 60792275  | G | T | G | K    | UTR5       | FAM13C    | NA       | NA                           |
| 13280 | 10 | 63489045  | 63489045  | G | T | G | K    | exonic     | ARID5B    | silent   | NM_032199:p.L362L            |
| 13280 | 10 | 64694428  | 64694428  | G | A | G | R    | exonic     | JMJD1C    | nonsense | NM_032776:p.Q146X            |
| 13280 | 10 | 121331792 | 121331792 | T | C | T | Y    | intronic   | TIAL1     | NA       | NA                           |

|       |    |           |           |   |   |   |      |            |           |          |                      |
|-------|----|-----------|-----------|---|---|---|------|------------|-----------|----------|----------------------|
| 13280 | 10 | 121747038 | 121747038 | G | T | G | K    | intergenic | NA        | NA       | NA                   |
| 13280 | 10 | 135020257 | 135020257 | - | C | G | */+C | intronic   | C10orf125 | NA       | NA                   |
| 13280 | 11 | 6189563   | 6189563   | C | A | C | M    | exonic     | FAM160A2  | nonsense | NM_032127:p.G904X    |
| 13280 | 11 | 14471812  | 14471812  | T | G | T | K    | exonic     | COPB1     | missense | NM_016451:p.H148P    |
| 13280 | 11 | 18543026  | 18543026  | T | C | T | Y    | exonic     | UEVLD     | missense | NM_018314:p.I201V    |
| 13280 | 11 | 20360260  | 20360260  | G | T | G | K    | intronic   | HTATIP2   | NA       | NA                   |
| 13280 | 11 | 33265498  | 33265498  | C | G | C | S    | exonic     | HIPK3     | missense | NM_005734:p.A321G    |
| 13280 | 11 | 46354426  | 46354426  | C | G | C | S    | intronic   | DGKZ      | NA       | NA                   |
| 13280 | 11 | 47135262  | 47135262  | G | T | G | K    | exonic     | C11orf49  | missense | NM_001003678:p.L188F |
| 13280 | 11 | 48504318  | 48504318  | C | A | C | M    | intergenic | NA        | NA       | NA                   |
| 13280 | 11 | 49811645  | 49811645  | A | T | A | W    | intergenic | NA        | NA       | NA                   |
| 13280 | 11 | 50163499  | 50163499  | C | T | C | Y    | intergenic | NA        | NA       | NA                   |
| 13280 | 11 | 57228951  | 57228951  | A | T | A | W    | intronic   | MED19     | NA       | NA                   |
| 13280 | 11 | 57728188  | 57728188  | C | A | C | M    | exonic     | OR1S2     | missense | NM_001004459:p.M14I  |
| 13280 | 11 | 57728189  | 57728189  | A | T | A | W    | exonic     | OR1S2     | missense | NM_001004459:p.M14K  |
| 13280 | 11 | 58522678  | 58522678  | A | T | A | W    | ncRNA      | LOC283194 | NA       | NA                   |
| 13280 | 11 | 64935291  | 64935291  | A | G | A | R    | exonic     | FRMD8     | missense | NM_031904:p.K427E    |
| 13280 | 11 | 65441851  | 65441851  | G | T | G | K    | exonic     | C11orf68  | missense | NM_001135635:p.F179L |
| 13280 | 11 | 76374301  | 76374301  | T | A | T | W    | intronic   | ACER3     | NA       | NA                   |
| 13280 | 11 | 82521141  | 82521141  | G | C | G | S    | intergenic | NA        | NA       | NA                   |
| 13280 | 11 | 85122763  | 85122763  | A | T | A | W    | exonic     | SYTL2     | missense | NM_001162953:p.N419K |
| 13280 | 11 | 89025383  | 89025383  | C | T | C | Y    | intergenic | NA        | NA       | NA                   |
| 13280 | 11 | 91708986  | 91708986  | G | C | G | S    | intergenic | NA        | NA       | NA                   |
| 13280 | 11 | 116208720 | 116208720 | G | A | G | R    | exonic     | APOC3     | silent   | NM_000040:p.L70L     |
| 13280 | 11 | 123771872 | 123771872 | C | T | C | Y    | exonic     | OR8B3     | missense | NM_001005467:p.E196K |
| 13280 | 11 | 123946143 | 123946143 | T | A | T | W    | exonic     | OR8A1     | silent   | NM_001005194:p.G323G |
| 13280 | 11 | 124142978 | 124142978 | G | A | G | R    | exonic     | C11orf61  | silent   | NM_024631:p.I276I    |
| 13280 | 12 | 527768    | 527768    | G | T | G | K    | intronic   | B4GALNT3  | NA       | NA                   |
| 13280 | 12 | 4078037   | 4078037   | C | T | C | Y    | intergenic | NA        | NA       | NA                   |
| 13280 | 12 | 8504817   | 8504817   | C | G | C | S    | intronic   | CLEC6A    | NA       | NA                   |
| 13280 | 12 | 33031036  | 33031036  | G | C | G | S    | intergenic | NA        | NA       | NA                   |
| 13280 | 12 | 43555320  | 43555320  | G | A | G | R    | exonic     | NELL2     | nonsense | NM_001145107:p.Q97X  |
| 13280 | 12 | 46658065  | 46658065  | G | A | G | R    | exonic     | COL2A1    | nonsense | NM_033150:p.R967X    |
| 13280 | 12 | 51934113  | 51934113  | C | T | C | Y    | exonic     | MFSD5     | silent   | NM_001170790:p.F516F |
| 13280 | 12 | 55693535  | 55693535  | T | A | T | W    | intronic   | TAC3      | NA       | NA                   |
| 13280 | 12 | 56150514  | 56150514  | C | A | C | M    | exonic     | GLI1      | missense | NM_001167609:p.A534E |
| 13280 | 12 | 61952222  | 61952222  | T | C | T | Y    | intergenic | NA        | NA       | NA                   |
| 13280 | 12 | 68492794  | 68492794  | C | G | C | S    | intronic   | RAB3IP    | NA       | NA                   |
| 13280 | 12 | 69015263  | 69015263  | C | G | C | S    | intronic   | CNOT2     | NA       | NA                   |
| 13280 | 12 | 88521712  | 88521712  | C | G | C | S    | exonic     | ATP2B1    | missense | NM_001001323:p.R919T |
| 13280 | 12 | 91699821  | 91699821  | C | A | C | M    | intronic   | EEA1      | NA       | NA                   |
| 13280 | 12 | 100113060 | 100113060 | C | G | C | S    | exonic     | SLC5A8    | missense | NM_145913:p.D161H    |
| 13280 | 12 | 102860431 | 102860431 | T | G | T | K    | intronic   | HSP90B1   | NA       | NA                   |
| 13280 | 12 | 105348219 | 105348219 | G | A | G | R    | exonic     | POLR3B    | silent   | NM_018082:p.Q434Q    |
| 13280 | 12 | 121415840 | 121415840 | G | A | G | R    | intronic   | CLIP1     | NA       | NA                   |
| 13280 | 12 | 121569346 | 121569346 | G | A | G | R    | exonic     | RSRC2     | missense | NM_023012:p.R131C    |
| 13280 | 12 | 122215901 | 122215901 | T | A | T | W    | exonic     | MPHOSPH9  | missense | NM_022782:p.T738S    |
| 13280 | 12 | 131062117 | 131062117 | C | T | C | Y    | exonic     | EP400     | silent   | NM_015409:p.L1141L   |
| 13280 | 12 | 131816697 | 131816697 | G | T | G | K    | exonic     | ANKLE2    | missense | NM_015114:p.S708R    |
| 13280 | 12 | 131834753 | 131834753 | C | T | C | Y    | intronic   | ANKLE2    | NA       | NA                   |
| 13280 | 13 | 18364629  | 18364629  | C | G | C | S    | intergenic | NA        | NA       | NA                   |
| 13280 | 13 | 21038985  | 21038985  | A | G | A | R    | exonic     | EFHA1     | silent   | NM_152726:p.Y103Y    |
| 13280 | 13 | 22813667  | 22813667  | C | T | C | Y    | exonic     | SACS      | nonsense | NM_014363:p.W783X    |
| 13280 | 13 | 23342223  | 23342223  | G | T | G | K    | exonic     | MIPEP     | missense | NM_005932:p.R239S    |
| 13280 | 13 | 24382075  | 24382075  | C | T | C | Y    | exonic     | CENPJ     | missense | NM_018451:p.E240K    |
| 13280 | 13 | 38495234  | 38495234  | G | A | G | R    | exonic     | C13orf23  | missense | NM_170719:p.P178S    |
| 13280 | 13 | 42442744  | 42442744  | A | G | A | R    | intronic   | EPST1     | NA       | NA                   |
| 13280 | 13 | 47935919  | 47935919  | A | T | A | W    | exonic     | RB1       | nonsense | NM_000321:p.K720X    |
| 13280 | 13 | 51380402  | 51380402  | G | C | G | S    | intergenic | NA        | NA       | NA                   |
| 13280 | 13 | 52293095  | 52293095  | T | A | T | W    | intergenic | NA        | NA       | NA                   |
| 13280 | 13 | 58002330  | 58002330  | C | T | C | Y    | intergenic | NA        | NA       | NA                   |
| 13280 | 13 | 114028535 | 114028535 | A | G | A | R    | exonic     | CDC16     | missense | NM_003903:p.N279S    |
| 13280 | 14 | 20895424  | 20895424  | T | A | T | W    | intronic   | SUPT16H   | NA       | NA                   |
| 13280 | 14 | 24045588  | 24045588  | A | T | A | W    | exonic     | CMA1      | missense | NM_001836:p.L91H     |
| 13280 | 14 | 44442190  | 44442190  | G | C | G | S    | exonic     | C14orf28  | missense | NM_001017923:p.L185F |
| 13280 | 14 | 51993678  | 51993678  | T | G | T | K    | intronic   | TXNDC16   | NA       | NA                   |
| 13280 | 14 | 66637423  | 66637423  | C | G | C | S    | intronic   | GPHN      | NA       | NA                   |
| 13280 | 14 | 76649633  | 76649633  | C | A | C | M    | exonic     | KIAA1737  | missense | NM_033426:p.P140Q    |
| 13280 | 15 | 19371207  | 19371207  | A | T | A | W    | intergenic | NA        | NA       | NA                   |
| 13280 | 15 | 19798830  | 19798830  | G | T | G | K    | ncRNA      | LOC727924 | NA       | NA                   |
| 13280 | 15 | 27796255  | 27796255  | C | T | C | Y    | exonic     | TJP1      | missense | NM_003257:p.E1352K   |
| 13280 | 15 | 40808983  | 40808983  | C | T | C | Y    | intronic   | CDAN1     | NA       | NA                   |
| 13280 | 15 | 41050100  | 41050100  | G | A | G | R    | intronic   | UBR1      | NA       | NA                   |
| 13280 | 15 | 43173748  | 43173748  | C | G | C | S    | exonic     | DUOX2     | silent   | NM_014080:p.G1513G   |
| 13280 | 15 | 47939721  | 47939721  | C | A | C | M    | exonic     | ATP8B4    | missense | NM_024837:p.V1181L   |
| 13280 | 15 | 50495705  | 50495705  | C | A | C | M    | exonic     | MYO5A     | missense | NM_001142495:p.A181S |
| 13280 | 15 | 51016607  | 51016607  | G | A | G | R    | intergenic | NA        | NA       | NA                   |
| 13280 | 15 | 56072211  | 56072211  | A | T | A | W    | exonic     | ALDH1A2   | missense | NM_170697:p.F165Y    |
| 13280 | 15 | 63464328  | 63464328  | C | A | C | M    | intronic   | IGDCC4    | NA       | NA                   |



|       |    |          |          |   |    |   |       |            |           |          |                       |
|-------|----|----------|----------|---|----|---|-------|------------|-----------|----------|-----------------------|
| 13280 | 15 | 67122118 | 67122118 | C | G  | C | S     | exonic     | NOX5      | missense | NM_001184779:p.F494L  |
| 13280 | 15 | 71196187 | 71196187 | G | A  | G | R     | exonic     | NEO1      | silent   | NM_002499:p.Q128Q     |
| 13280 | 15 | 71676430 | 71676430 | A | G  | A | R     | exonic     | NPTN      | missense | NM_001161363:p.I142T  |
| 13280 | 15 | 73862896 | 73862896 | G | A  | G | R     | intergenic | NA        | NA       | NA                    |
| 13280 | 15 | 75023256 | 75023256 | G | C  | G | S     | exonic     | RCN2      | missense | NM_002902:p.D184H     |
| 13280 | 15 | 75193675 | 75193675 | C | A  | C | M     | exonic     | SGK269    | missense | NM_024776:p.A1707S    |
| 13280 | 15 | 76667761 | 76667761 | A | G  | A | R     | exonic     | CHRNA5    | missense | NM_000745:p.I118M     |
| 13280 | 15 | 83127820 | 83127820 | C | A  | C | M     | exonic     | ZNF592    | missense | NM_014630:p.Q304K     |
| 13280 | 15 | 83127845 | 83127845 | C | T  | C | Y     | exonic     | ZNF592    | missense | NM_014630:p.S312L     |
| 13280 | 15 | 83128397 | 83128397 | C | G  | C | S     | exonic     | ZNF592    | missense | NM_014630:p.A496G     |
| 13280 | 15 | 87333728 | 87333728 | A | C  | A | M     | intergenic | NA        | NA       | NA                    |
| 13280 | 16 | 1219711  | 1219711  | G | A  | G | R     | exonic     | TPSB2     | silent   | NM_024164:p.G30G      |
| 13280 | 16 | 2074715  | 2074715  | C | T  | C | Y     | exonic     | TSC2      | silent   | NM_001077183:p.P1430P |
| 13280 | 16 | 2074786  | 2074786  | C | G  | C | S     | intronic   | TSC2      | NA       | NA                    |
| 13280 | 16 | 2141733  | 2141733  | G | A  | G | R     | exonic     | RAB26     | missense | NM_014353:p.V129I     |
| 13280 | 16 | 20399439 | 20399439 | G | T  | G | K     | exonic     | ACSM2A    | missense | NM_001010845:p.W442L  |
| 13280 | 16 | 30953890 | 30953890 | C | T  | C | Y     | intronic   | STX4      | NA       | NA                    |
| 13280 | 16 | 33858570 | 33858570 | G | T  | G | K     | intergenic | NA        | NA       | NA                    |
| 13280 | 17 | 1633007  | 1633007  | G | C  | G | S     | intronic   | SMYD4     | NA       | NA                    |
| 13280 | 17 | 1730533  | 1730533  | T | A  | T | W     | intronic   | RPA1      | NA       | NA                    |
| 13280 | 17 | 11583020 | 11583020 | C | A  | C | M     | exonic     | DNAH9     | silent   | NM_001372:p.T1971T    |
| 13280 | 17 | 25909786 | 25909786 | T | C  | T | Y     | upstream   | TBC1D29   | NA       | NA                    |
| 13280 | 17 | 25983871 | 25983871 | A | C  | A | M     | ncRNA      | LRRC37BP1 | NA       | NA                    |
| 13280 | 17 | 26120050 | 26120050 | A | T  | A | W     | intergenic | NA        | NA       | NA                    |
| 13280 | 17 | 26600139 | 26600139 | C | G  | C | S     | exonic     | NF1       | nonsense | NM_001042492:p.S1329X |
| 13280 | 17 | 30795728 | 30795728 | G | A  | G | R     | intronic   | SLFN13    | NA       | NA                    |
| 13280 | 17 | 35550980 | 35550980 | T | C  | T | Y     | intronic   | CASC3     | NA       | NA                    |
| 13280 | 17 | 36450828 | 36450828 | G | T  | G | K     | exonic     | KRTAP1-1  | silent   | NM_030967:p.I116I     |
| 13280 | 17 | 53407079 | 53407079 | C | A  | C | M     | exonic     | VEZF1     | missense | NM_007146:p.M440I     |
| 13280 | 17 | 64625618 | 64625618 | C | T  | C | Y     | intronic   | ABCA6     | NA       | NA                    |
| 13280 | 17 | 70461845 | 70461845 | C | A  | C | M     | exonic     | C17orf28  | missense | NM_030630:p.S616I     |
| 13280 | 17 | 71264738 | 71264738 | G | A  | G | R     | exonic     | ITGB4     | missense | NM_000213:p.G1725R    |
| 13280 | 17 | 71459246 | 71459246 | C | G  | C | S     | exonic     | ACOX1     | missense | NM_001185039:p.E280Q  |
| 13280 | 18 | 895347   | 895347   | C | A  | C | M     | UTR5       | ADCYAP1   | NA       | NA                    |
| 13280 | 18 | 1720275  | 1720275  | G | A  | G | R     | intergenic | NA        | NA       | NA                    |
| 13280 | 18 | 3437845  | 3437845  | C | T  | C | Y     | intronic   | TGIF1     | NA       | NA                    |
| 13280 | 18 | 3967899  | 3967899  | C | G  | C | S     | intergenic | NA        | NA       | NA                    |
| 13280 | 18 | 14603897 | 14603897 | C | G  | C | S     | intergenic | NA        | NA       | NA                    |
| 13280 | 18 | 19352810 | 19352810 | G | C  | G | S     | intronic   | C18orf8   | NA       | NA                    |
| 13280 | 18 | 26132965 | 26132965 | C | A  | C | M     | downstream | MIR302F   | NA       | NA                    |
| 13280 | 18 | 27871231 | 27871231 | G | C  | G | S     | splicing   | RNF125    | NA       | NA                    |
| 13280 | 18 | 45342620 | 45342620 | A | G  | A | R     | UTR5       | LIPG      | NA       | NA                    |
| 13280 | 18 | 49239652 | 49239652 | C | T  | C | Y     | exonic     | DCC       | nonsense | NM_005215:p.R1149X    |
| 13280 | 18 | 72675770 | 72675770 | T | C  | T | Y     | intronic   | ZNF236    | NA       | NA                    |
| 13280 | 19 | 3604520  | 3604520  | C | T  | C | Y     | exonic     | PIP5K1C   | missense | NM_012398:p.G230D     |
| 13280 | 19 | 9662536  | 9662536  | G | T  | G | K     | intergenic | NA        | NA       | NA                    |
| 13280 | 19 | 12244233 | 12244233 | C | G  | C | S     | exonic     | ZNF44     | missense | NM_001164276:p.D661H  |
| 13280 | 19 | 12245310 | 12245310 | C | T  | C | Y     | exonic     | ZNF44     | missense | NM_001164276:p.E302K  |
| 13280 | 19 | 15867324 | 15867324 | T | C  | T | Y     | exonic     | CYP4F2    | missense | NM_001082:p.N112S     |
| 13280 | 19 | 16868069 | 16868069 | A | C  | A | M     | exonic     | CPAMD8    | missense | NM_015692:p.L1829V    |
| 13280 | 19 | 17299498 | 17299498 | C | T  | C | Y     | splicing   | ANO8      | silent   | NM_020959:p.Q806Q     |
| 13280 | 19 | 19104175 | 19104175 | C | A  | C | M     | exonic     | TMEM161A  | silent   | NM_017814:p.T143T     |
| 13280 | 19 | 20027739 | 20027739 | A | T  | A | W     | intergenic | NA        | NA       | NA                    |
| 13280 | 19 | 20274519 | 20274519 | - | TA | T | */+TA | intergenic | NA        | NA       | NA                    |
| 13280 | 19 | 22063117 | 22063117 | C | T  | C | Y     | exonic     | ZNF257    | missense | NM_033468:p.S242L     |
| 13280 | 19 | 22445941 | 22445941 | C | G  | C | S     | intergenic | NA        | NA       | NA                    |
| 13280 | 19 | 22732666 | 22732666 | C | A  | C | M     | exonic     | ZNF99     | missense | NM_001080409:p.A538S  |
| 13280 | 19 | 33974385 | 33974385 | C | A  | C | M     | intergenic | NA        | NA       | NA                    |
| 13280 | 19 | 40492838 | 40492838 | C | A  | C | M     | exonic     | MAG       | missense | NM_080600:p.R485S     |
| 13280 | 19 | 42817788 | 42817788 | T | A  | T | W     | exonic     | ZFP30     | missense | NM_014898:p.E498D     |
| 13280 | 19 | 43686654 | 43686654 | G | A  | G | R     | intronic   | RYR1      | NA       | NA                    |
| 13280 | 19 | 43768800 | 43768800 | A | G  | A | R     | intronic   | RYR1      | NA       | NA                    |
| 13280 | 19 | 45414989 | 45414989 | G | T  | G | K     | exonic     | TTC9B     | silent   | NM_152479:p.G185G     |
| 13280 | 19 | 46045870 | 46045870 | G | C  | G | S     | intronic   | CYP2A6    | NA       | NA                    |
| 13280 | 19 | 47935113 | 47935113 | G | C  | G | S     | intronic   | PSG3      | NA       | NA                    |
| 13280 | 19 | 48277259 | 48277259 | C | A  | C | M     | intronic   | PSG2      | NA       | NA                    |
| 13280 | 19 | 50255515 | 50255515 | G | C  | G | S     | exonic     | CLASRP    | missense | NM_007056:p.E247Q     |
| 13280 | 19 | 51892227 | 51892227 | G | A  | G | R     | intronic   | PRKD2     | NA       | NA                    |
| 13280 | 19 | 51922692 | 51922692 | G | A  | G | R     | intronic   | STRN4     | NA       | NA                    |
| 13280 | 19 | 53034920 | 53034920 | A | T  | A | W     | exonic     | CRX       | missense | NM_000554:p.S262C     |
| 13280 | 19 | 53525454 | 53525454 | G | A  | G | R     | exonic     | EMP3      | missense | NM_001425:p.G136E     |
| 13280 | 19 | 56382526 | 56382526 | C | T  | C | Y     | intergenic | NA        | NA       | NA                    |
| 13280 | 19 | 59005349 | 59005349 | C | G  | C | S     | exonic     | NLRP12    | missense | NM_144687:p.R459T     |
| 13280 | 19 | 59470584 | 59470584 | A | G  | A | R     | intronic   | LILRB2    | NA       | NA                    |
| 13280 | 19 | 59797677 | 59797677 | A | T  | A | W     | intronic   | LILRA1    | NA       | NA                    |
| 13280 | 19 | 59797691 | 59797691 | A | T  | A | W     | intronic   | LILRA1    | NA       | NA                    |
| 13280 | 19 | 59798036 | 59798036 | C | A  | C | M     | exonic     | LILRA1    | silent   | NM_006863:p.T55T      |
| 13280 | 19 | 59834830 | 59834830 | C | A  | C | M     | exonic     | LILRB1    | silent   | NM_001081639:p.T46T   |
| 13280 | 19 | 59912419 | 59912419 | T | C  | T | Y     | ncRNA      | LILRP2    | NA       | NA                    |

|       |    |           |           |   |   |   |      |            |         |          |                           |
|-------|----|-----------|-----------|---|---|---|------|------------|---------|----------|---------------------------|
| 13280 | 19 | 60357112  | 60357112  | C | T | C | Y    | intronic   | TNNI3   | NA       | NA                        |
| 13280 | 19 | 60515052  | 60515052  | G | T | G | K    | intronic   | BRSK1   | NA       | NA                        |
| 13280 | 19 | 62531339  | 62531339  | G | T | G | K    | exonic     | ZNF543  | missense | NM_213598:p.G233W         |
| 13280 | 19 | 63144458  | 63144458  | C | G | C | S    | exonic     | ZNF256  | missense | NM_005773:p.Q510H         |
| 13280 | 19 | 63464456  | 63464456  | G | C | G | S    | exonic     | ZNF544  | missense | NM_014480:p.Q224H         |
| 13280 | 19 | 63559421  | 63559421  | T | C | T | Y    | exonic     | ZNF497  | missense | NM_198458:p.T465A         |
| 13280 | 20 | 16433005  | 16433005  | G | C | G | S    | intronic   | KIF16B  | NA       | NA                        |
| 13280 | 20 | 23562604  | 23562604  | C | A | C | M    | exonic     | CST3    | silent   | NM_000099:p.V130V         |
| 13280 | 20 | 23617569  | 23617569  | G | A | G | R    | exonic     | CST4    | missense | NM_001899:p.A13V          |
| 13280 | 20 | 28259322  | 28259322  | C | T | C | Y    | intergenic | NA      | NA       | NA                        |
| 13280 | 20 | 30247894  | 30247894  | G | A | G | R    | UTR3       | PLAGL2  | NA       | NA                        |
| 13280 | 20 | 31084499  | 31084499  | C | - | G | *-/C | exonic     | BPIL3   | FS_del   | NM_174897:c.146_146delC   |
| 13280 | 20 | 33335408  | 33335408  | C | A | C | M    | exonic     | EIF6    | missense | NM_002212:p.G60W          |
| 13280 | 20 | 34683145  | 34683145  | G | T | G | K    | intronic   | SLA2    | NA       | NA                        |
| 13280 | 20 | 36073739  | 36073739  | C | G | C | S    | exonic     | TTI1    | missense | NM_014657:p.E632Q         |
| 13280 | 20 | 62133707  | 62133707  | T | C | T | Y    | intronic   | PRPF6   | NA       | NA                        |
| 13280 | 20 | 62133708  | 62133708  | G | T | G | K    | intronic   | PRPF6   | NA       | NA                        |
| 13280 | 21 | 9744061   | 9744061   | G | T | G | K    | intergenic | NA      | NA       | NA                        |
| 13280 | 21 | 9964742   | 9964742   | C | A | C | M    | intronic   | TPTE    | NA       | NA                        |
| 13280 | 21 | 39782350  | 39782350  | T | C | T | Y    | intronic   | SH3BGR  | NA       | NA                        |
| 13280 | 21 | 42211271  | 42211271  | A | T | A | W    | intronic   | C2CD2   | NA       | NA                        |
| 13280 | 22 | 15251087  | 15251087  | G | A | G | R    | intergenic | NA      | NA       | NA                        |
| 13280 | 22 | 17755346  | 17755346  | G | C | G | S    | intronic   | HIRA    | NA       | NA                        |
| 13280 | 22 | 21319770  | 21319770  | G | T | G | K    | intronic   | GGTLC2  | NA       | NA                        |
| 13280 | 22 | 22510575  | 22510575  | G | A | G | R    | exonic     | DERL3   | silent   | NM_001135751:p.F97F       |
| 13280 | 22 | 22823943  | 22823943  | C | G | C | S    | intronic   | CABIN1  | NA       | NA                        |
| 13280 | 22 | 27523200  | 27523200  | G | A | G | R    | intronic   | XBP1    | NA       | NA                        |
| 13280 | 22 | 29661039  | 29661039  | G | A | G | R    | exonic     | MORC2   | missense | NM_014941:p.P579L         |
| 13280 | 22 | 31322621  | 31322621  | G | T | G | K    | intronic   | SYN3    | NA       | NA                        |
| 13280 | 22 | 36804371  | 36804371  | C | G | C | S    | exonic     | SLC16A8 | silent   | NM_013356:p.A495A         |
| 13280 | 22 | 48906616  | 48906616  | G | T | G | K    | intronic   | MOV10L1 | NA       | NA                        |
| 13280 | 22 | 49290644  | 49290644  | G | A | G | R    | intronic   | LMF2    | NA       | NA                        |
| 13280 | X  | 2788055   | 2788055   | C | A | C | M    | exonic     | GYG2    | silent   | NM_003918:p.P293P         |
| 13280 | X  | 10141668  | 10141668  | C | G | C | S    | intronic   | CLCN4   | NA       | NA                        |
| 13280 | X  | 11633435  | 11633435  | C | T | C | Y    | intergenic | NA      | NA       | NA                        |
| 13280 | X  | 12537853  | 12537853  | A | G | A | R    | exonic     | FRMPD4  | missense | NM_014728:p.D84G          |
| 13280 | X  | 15494486  | 15494486  | G | T | G | K    | intronic   | ACE2    | NA       | NA                        |
| 13280 | X  | 15580516  | 15580516  | A | - | C | *-/A | intronic   | TMEM27  | NA       | NA                        |
| 13280 | X  | 15751123  | 15751123  | G | A | G | R    | exonic     | ZRSR2   | missense | NM_005089:p.R429H         |
| 13280 | X  | 18503403  | 18503403  | G | C | G | S    | exonic     | CDKL5   | missense | NM_001037343:p.E52Q       |
| 13280 | X  | 23321754  | 23321754  | C | G | C | S    | exonic     | PTCHD1  | missense | NM_173495:p.S733C         |
| 13280 | X  | 41091281  | 41091281  | A | G | A | R    | intronic   | DDX3X   | NA       | NA                        |
| 13280 | X  | 45657473  | 45657473  | T | C | T | Y    | intergenic | NA      | NA       | NA                        |
| 13280 | X  | 46836452  | 46836452  | G | T | G | K    | exonic     | RGN     | missense | NM_004683:p.C248F         |
| 13280 | X  | 47372558  | 47372558  | G | C | G | S    | exonic     | CFP     | missense | NM_002621:p.S97C          |
| 13280 | X  | 47382582  | 47382582  | C | T | C | Y    | intronic   | ELK1    | NA       | NA                        |
| 13280 | X  | 47941717  | 47941717  | T | A | T | W    | upstream   | SSX5    | NA       | NA                        |
| 13280 | X  | 48049049  | 48049049  | C | A | C | M    | intergenic | NA      | NA       | NA                        |
| 13280 | X  | 48936733  | 48936733  | C | A | C | M    | exonic     | SYP     | missense | NM_003179:p.Q185H         |
| 13280 | X  | 49660341  | 49660341  | C | T | C | Y    | intronic   | CLCN5   | NA       | NA                        |
| 13280 | X  | 50367314  | 50367314  | G | T | G | K    | exonic     | SHROOM4 | missense | NM_020717:p.H1190N        |
| 13280 | X  | 53240957  | 53240957  | C | T | C | Y    | exonic     | KDM5C   | missense | NM_001146702:p.D1040N     |
| 13280 | X  | 53294659  | 53294659  | G | T | G | K    | exonic     | IQSEC2  | silent   | NM_015075:p.R605R         |
| 13280 | X  | 53851410  | 53851410  | A | - | T | *-/A | intergenic | NA      | NA       | NA                        |
| 13280 | X  | 55050120  | 55050120  | C | G | C | S    | exonic     | APEX2   | missense | NM_014481:p.Q362E         |
| 13280 | X  | 55530119  | 55530119  | G | A | G | R    | exonic     | USP51   | missense | NM_201286:p.T660I         |
| 13280 | X  | 63442956  | 63442956  | A | C | A | M    | intronic   | MTMR8   | NA       | NA                        |
| 13280 | X  | 64670145  | 64670145  | G | A | G | R    | intronic   | LAS1L   | NA       | NA                        |
| 13280 | X  | 65212194  | 65212194  | C | T | C | Y    | intergenic | NA      | NA       | NA                        |
| 13280 | X  | 69074107  | 69074107  | A | G | A | R    | intronic   | EDA     | NA       | NA                        |
| 13280 | X  | 70435092  | 70435092  | T | C | T | Y    | intronic   | NONO    | NA       | NA                        |
| 13280 | X  | 70674365  | 70674365  | C | A | C | M    | intronic   | OGT     | NA       | NA                        |
| 13280 | X  | 71789183  | 71789183  | G | T | G | K    | exonic     | PHKA1   | missense | NM_001172436:p.P394H      |
| 13280 | X  | 74720939  | 74720939  | C | A | C | M    | intergenic | NA      | NA       | NA                        |
| 13280 | X  | 74720940  | 74720940  | C | A | C | M    | intergenic | NA      | NA       | NA                        |
| 13280 | X  | 81648883  | 81648883  | C | - | G | *-/C | intergenic | NA      | NA       | NA                        |
| 13280 | X  | 91125116  | 91125116  | C | A | C | M    | intronic   | PCDH11X | NA       | NA                        |
| 13280 | X  | 99821095  | 99821095  | G | A | G | R    | intronic   | SYTL4   | NA       | NA                        |
| 13280 | X  | 100012386 | 100012386 | T | C | T | Y    | exonic     | NOX1    | missense | NM_013955:p.Y40C          |
| 13280 | X  | 101268397 | 101268397 | C | G | C | S    | UTR5       | TCEAL2  | NA       | NA                        |
| 13280 | X  | 101743917 | 101743917 | A | G | A | R    | exonic     | ARMCX5  | silent   | NM_001168480:p.T64T       |
| 13280 | X  | 113988790 | 113988790 | C | T | C | Y    | intronic   | HTR2C   | NA       | NA                        |
| 13280 | X  | 117584044 | 117584044 | T | G | T | K    | exonic     | DOCK11  | missense | NM_144658:p.Y248D         |
| 13280 | X  | 117584105 | 117584105 | A | T | A | W    | exonic     | DOCK11  | missense | NM_144658:p.K268I         |
| 13280 | X  | 128976652 | 128976652 | C | - | A | *-/C | exonic     | BCORL1  | FS_del   | NM_021946:c.2223_2223delC |
| 13280 | X  | 134569946 | 134569946 | A | T | A | W    | intergenic | NA      | NA       | NA                        |
| 13280 | X  | 150567725 | 150567725 | C | G | C | S    | intronic   | PASD1   | NA       | NA                        |
| 13280 | Y  | 11701674  | 11701674  | G | A | G | R    | intergenic | NA      | NA       | NA                        |
| 13280 | M  | 1649      | 1649      | T | C | T | Y    | downstream | MIR1978 | NA       | NA                        |

|       |    |           |           |   |   |   |   |            |           |          |                      |
|-------|----|-----------|-----------|---|---|---|---|------------|-----------|----------|----------------------|
| 13299 | 1  | 141482263 | 141482263 | G | A | G | R | intergenic | NA        | NA       | NA                   |
| 13299 | 2  | 91023181  | 91023181  | C | G | C | S | intergenic | NA        | NA       | NA                   |
| 13299 | 2  | 91144838  | 91144838  | A | T | A | W | intergenic | NA        | NA       | NA                   |
| 13299 | 3  | 75870266  | 75870266  | A | G | A | R | exonic     | ZNF717    | missense | NM_001128223:p.C400R |
| 13299 | 3  | 75870274  | 75870274  | C | A | C | M | exonic     | ZNF717    | missense | NM_001128223:p.C397F |
| 13299 | 3  | 113476382 | 113476382 | C | T | C | Y | intronic   | SLC9A10   | NA       | NA                   |
| 13299 | 4  | 40829     | 40829     | A | G | A | R | intergenic | NA        | NA       | NA                   |
| 13299 | 7  | 77235845  | 77235845  | T | A | T | W | intronic   | RSBN1L    | NA       | NA                   |
| 13299 | 8  | 57551879  | 57551879  | G | T | G | K | intergenic | NA        | NA       | NA                   |
| 13299 | 9  | 67915914  | 67915914  | C | G | C | S | intergenic | NA        | NA       | NA                   |
| 13299 | 10 | 38685363  | 38685363  | C | T | C | Y | ncRNA      | HSD17B7P2 | NA       | NA                   |
| 13299 | 11 | 125651413 | 125651413 | T | G | T | K | intronic   | FOXRED1   | NA       | NA                   |
| 13299 | 16 | 32741280  | 32741280  | T | C | T | Y | intergenic | NA        | NA       | NA                   |
| 13299 | 17 | 78137569  | 78137569  | G | T | G | K | intronic   | FOXX2     | NA       | NA                   |
| 13299 | 18 | 15262170  | 15262170  | C | A | C | M | intergenic | NA        | NA       | NA                   |
| 13299 | 18 | 16773248  | 16773248  | A | C | A | M | intergenic | NA        | NA       | NA                   |
| 13299 | Y  | 11784218  | 11784218  | G | T | G | K | intergenic | NA        | NA       | NA                   |
| 13394 | 1  | 2519484   | 2519484   | T | C | T | Y | intronic   | MMEL1     | NA       | NA                   |
| 13394 | 1  | 3309278   | 3309278   | G | T | G | K | exonic     | PRDM16    | missense | NM_199454:p.R247L    |
| 13394 | 1  | 11182124  | 11182124  | C | T | C | Y | intronic   | MTOR      | NA       | NA                   |
| 13394 | 1  | 11182161  | 11182161  | C | T | C | Y | intronic   | MTOR      | NA       | NA                   |
| 13394 | 1  | 11182305  | 11182305  | C | G | C | S | exonic     | MTOR      | silent   | NM_004958:p.L1329L   |
| 13394 | 1  | 11182419  | 11182419  | C | G | C | S | intronic   | MTOR      | NA       | NA                   |
| 13394 | 1  | 33962809  | 33962809  | C | A | C | M | exonic     | CSMD2     | missense | NM_052896:p.A887S    |
| 13394 | 1  | 42815220  | 42815220  | C | G | C | S | intronic   | CCDC30    | NA       | NA                   |
| 13394 | 1  | 68682766  | 68682766  | C | G | C | S | intronic   | RPE65     | NA       | NA                   |
| 13394 | 1  | 86736972  | 86736972  | C | A | C | M | exonic     | CLCA1     | missense | NM_001285:p.P748H    |
| 13394 | 1  | 92714255  | 92714255  | G | T | G | K | exonic     | GFI1      | missense | NM_005263:p.F396L    |
| 13394 | 1  | 141537205 | 141537205 | C | A | C | M | intergenic | NA        | NA       | NA                   |
| 13394 | 1  | 141537209 | 141537209 | A | G | A | R | intergenic | NA        | NA       | NA                   |
| 13394 | 1  | 141537210 | 141537210 | T | C | T | Y | intergenic | NA        | NA       | NA                   |
| 13394 | 1  | 154798216 | 154798216 | C | T | C | Y | intronic   | IQGAP3    | NA       | NA                   |
| 13394 | 1  | 156864046 | 156864046 | A | G | A | R | exonic     | SPTA1     | missense | NM_003126:p.L1886P   |
| 13394 | 1  | 159053326 | 159053326 | A | G | A | R | intronic   | LY9       | NA       | NA                   |
| 13394 | 1  | 159309233 | 159309233 | C | T | C | Y | exonic     | PVRL4     | missense | NM_030916:p.E459K    |
| 13394 | 1  | 165756203 | 165756203 | A | C | A | M | intergenic | NA        | NA       | NA                   |
| 13394 | 1  | 174935263 | 174935263 | G | T | G | K | exonic     | PAPPA2    | missense | NM_020318:p.V1051L   |
| 13394 | 1  | 184587837 | 184587837 | T | A | T | W | exonic     | TPR       | missense | NM_003292:p.K788M    |
| 13394 | 1  | 196163523 | 196163523 | G | T | G | K | exonic     | LHX9      | missense | NM_001014434:p.G296C |
| 13394 | 1  | 202670253 | 202670253 | T | C | T | Y | exonic     | PIK3C2B   | missense | NM_002646:p.H1208R   |
| 13394 | 1  | 234979034 | 234979034 | C | G | C | S | intronic   | ACTN2     | NA       | NA                   |
| 13394 | 1  | 245779135 | 245779135 | C | A | C | M | exonic     | C1orf150  | silent   | NM_145278:p.R7R      |
| 13394 | 2  | 58220303  | 58220303  | A | T | A | W | splicing   | VRK2      | NA       | NA                   |
| 13394 | 2  | 61392106  | 61392106  | G | A | G | R | intronic   | USP34     | NA       | NA                   |
| 13394 | 2  | 71750182  | 71750182  | G | C | G | S | intronic   | DYSF      | NA       | NA                   |
| 13394 | 2  | 98219587  | 98219587  | G | T | G | K | exonic     | VWA3B     | missense | NM_144992:p.V879F    |
| 13394 | 2  | 114199553 | 114199553 | T | C | T | Y | exonic     | SLC35F5   | silent   | NM_025181:p.L374L    |
| 13394 | 2  | 132751109 | 132751109 | G | A | G | R | intergenic | NA        | NA       | NA                   |
| 13394 | 2  | 136676503 | 136676503 | T | A | T | W | intergenic | NA        | NA       | NA                   |
| 13394 | 2  | 154851463 | 154851463 | C | T | C | Y | intronic   | GALNT13   | NA       | NA                   |
| 13394 | 2  | 191552695 | 191552695 | C | A | C | M | intronic   | STAT1     | NA       | NA                   |
| 13394 | 2  | 198206729 | 198206729 | G | T | G | K | exonic     | RFTN2     | missense | NM_144629:p.Q226K    |
| 13394 | 2  | 203775774 | 203775774 | G | C | G | S | intronic   | NBEAL1    | NA       | NA                   |
| 13394 | 2  | 207132871 | 207132871 | G | A | G | R | intronic   | ADAM23    | NA       | NA                   |
| 13394 | 2  | 225076597 | 225076597 | C | G | C | S | intronic   | CUL3      | NA       | NA                   |
| 13394 | 2  | 232033386 | 232033386 | C | T | C | Y | intronic   | NCL       | NA       | NA                   |
| 13394 | 3  | 10836396  | 10836396  | G | T | G | K | splicing   | SLC6A11   | NA       | NA                   |
| 13394 | 3  | 10836397  | 10836397  | G | T | G | K | splicing   | SLC6A11   | missense | NM_014229:p.G131V    |
| 13394 | 3  | 49852687  | 49852687  | C | T | C | Y | intronic   | TRAIIP    | NA       | NA                   |
| 13394 | 3  | 56628651  | 56628651  | T | C | T | Y | intronic   | CCDC66    | NA       | NA                   |
| 13394 | 3  | 66532150  | 66532150  | A | G | A | R | exonic     | LRIG1     | missense | NM_015541:p.L389P    |
| 13394 | 3  | 99592638  | 99592638  | G | C | G | S | exonic     | OR5K3     | missense | NM_001005516:p.G147R |
| 13394 | 3  | 99592639  | 99592639  | G | T | G | K | exonic     | OR5K3     | missense | NM_001005516:p.G147V |
| 13394 | 3  | 118228190 | 118228190 | G | C | G | S | intergenic | NA        | NA       | NA                   |
| 13394 | 3  | 128863890 | 128863890 | A | C | A | M | intronic   | PODXL2    | NA       | NA                   |
| 13394 | 3  | 138737257 | 138737257 | A | G | A | R | intergenic | NA        | NA       | NA                   |
| 13394 | 3  | 140696239 | 140696239 | G | T | G | K | intergenic | NA        | NA       | NA                   |
| 13394 | 3  | 150570384 | 150570384 | G | C | G | S | intronic   | TM4SF1    | NA       | NA                   |
| 13394 | 3  | 152550611 | 152550611 | A | G | A | R | exonic     | MED12L    | silent   | NM_053002:p.A740A    |
| 13394 | 4  | 38781234  | 38781234  | G | C | G | S | intronic   | KLHL5     | NA       | NA                   |
| 13394 | 4  | 68853105  | 68853105  | A | G | A | R | intergenic | NA        | NA       | NA                   |
| 13394 | 4  | 77143756  | 77143756  | T | C | T | Y | UTR3       | CXCL9     | NA       | NA                   |
| 13394 | 4  | 83566334  | 83566334  | A | T | A | W | intronic   | HNRPD     | NA       | NA                   |
| 13394 | 4  | 93322948  | 93322948  | G | T | G | K | intergenic | NA        | NA       | NA                   |
| 13394 | 4  | 96981493  | 96981493  | G | T | G | K | UTR3       | PDHA2     | NA       | NA                   |
| 13394 | 4  | 96981494  | 96981494  | G | T | G | K | UTR3       | PDHA2     | NA       | NA                   |
| 13394 | 4  | 125811277 | 125811277 | G | T | G | K | exonic     | ANKRD50   | missense | NM_020337:p.Q869K    |
| 13394 | 4  | 186781777 | 186781777 | G | A | G | R | exonic     | SORBS2    | silent   | NM_021069:p.S596S    |
| 13394 | 5  | 33612445  | 33612445  | G | A | G | R | exonic     | ADAMTS12  | missense | NM_030955:p.T1148I   |

|       |    |           |           |    |   |   |       |            |          |          |                            |
|-------|----|-----------|-----------|----|---|---|-------|------------|----------|----------|----------------------------|
| 13394 | 5  | 37144359  | 37144359  | T  | A | T | W     | intronic   | C5orf42  | NA       | NA                         |
| 13394 | 5  | 37184109  | 37184109  | T  | C | T | Y     | exonic     | C5orf42  | missense | NM_023073:p.L2744V         |
| 13394 | 5  | 39756337  | 39756337  | G  | C | G | S     | intergenic | NA       | NA       | NA                         |
| 13394 | 5  | 39756338  | 39756338  | G  | T | G | K     | intergenic | NA       | NA       | NA                         |
| 13394 | 5  | 161501943 | 161501943 | C  | A | C | M     | intronic   | GABRG2   | NA       | NA                         |
| 13394 | 6  | 3977676   | 3977676   | C  | T | C | Y     | exonic     | PRPF4B   | missense | NM_003913:p.S309F          |
| 13394 | 6  | 104572720 | 104572720 | C  | A | C | M     | intergenic | NA       | NA       | NA                         |
| 13394 | 6  | 107527127 | 107527127 | A  | T | A | W     | intronic   | BEND3    | NA       | NA                         |
| 13394 | 6  | 112496248 | 112496248 | T  | C | T | Y     | exonic     | WISP3    | missense | NM_003880:p.L246P          |
| 13394 | 7  | 34061306  | 34061306  | A  | G | A | R     | exonic     | BMPER    | missense | NM_133468:p.T265A          |
| 13394 | 7  | 35087760  | 35087760  | C  | T | C | Y     | intergenic | NA       | NA       | NA                         |
| 13394 | 7  | 138508079 | 138508079 | G  | A | G | R     | intronic   | TTC26    | NA       | NA                         |
| 13394 | 8  | 38291301  | 38291301  | T  | A | T | W     | intronic   | WHSC1L1  | NA       | NA                         |
| 13394 | 8  | 47622932  | 47622932  | C  | T | C | Y     | intergenic | NA       | NA       | NA                         |
| 13394 | 8  | 89137533  | 89137533  | C  | A | C | M     | exonic     | MMP16    | missense | NM_005941:p.G438C          |
| 13394 | 8  | 92448100  | 92448100  | G  | T | G | K     | exonic     | SLC26A7  | missense | NM_134266:p.Q535H          |
| 13394 | 9  | 21268275  | 21268275  | T  | A | T | W     | intergenic | NA       | NA       | NA                         |
| 13394 | 9  | 66205000  | 66205000  | A  | G | A | R     | intergenic | NA       | NA       | NA                         |
| 13394 | 9  | 67907138  | 67907138  | G  | A | G | R     | intergenic | NA       | NA       | NA                         |
| 13394 | 9  | 69971591  | 69971591  | G  | T | G | K     | intergenic | NA       | NA       | NA                         |
| 13394 | 9  | 111938576 | 111938576 | G  | T | G | K     | exonic     | AKAP2    | nonsense | NM_007203:p.E311X          |
| 13394 | 9  | 132517442 | 132517442 | G  | A | G | R     | intergenic | NA       | NA       | NA                         |
| 13394 | 10 | 1272137   | 1272137   | T  | C | T | Y     | intronic   | ADARB2   | NA       | NA                         |
| 13394 | 10 | 17182203  | 17182203  | C  | A | C | M     | exonic     | CUBN     | missense | NM_001081:p.M524I          |
| 13394 | 10 | 17472604  | 17472604  | C  | A | C | M     | exonic     | ST8SIA6  | silent   | NM_001004470:p.S74S        |
| 13394 | 10 | 18294550  | 18294550  | A  | G | A | R     | exonic     | SLC39A12 | missense | NM_152725:p.N226D          |
| 13394 | 10 | 50360817  | 50360817  | T  | A | T | W     | exonic     | ERCC6    | missense | NM_000124:p.L697F          |
| 13394 | 10 | 50526646  | 50526646  | C  | A | C | M     | exonic     | CHAT     | missense | NM_020984:p.L339M          |
| 13394 | 10 | 64073767  | 64073767  | A  | C | A | M     | intronic   | ZNF365   | NA       | NA                         |
| 13394 | 10 | 79251522  | 79251522  | T  | C | T | Y     | exonic     | DLG5     | missense | NM_004747:p.D909G          |
| 13394 | 10 | 89675267  | 89675267  | A  | G | A | R     | exonic     | PTEN     | missense | NM_000314:p.H61R           |
| 13394 | 10 | 96152360  | 96152360  | G  | A | G | R     | UTR5       | TBC1D12  | NA       | NA                         |
| 13394 | 10 | 97939481  | 97939481  | T  | A | T | W     | intergenic | NA       | NA       | NA                         |
| 13394 | 10 | 97939484  | 97939484  | A  | T | A | W     | intergenic | NA       | NA       | NA                         |
| 13394 | 10 | 132925512 | 132925512 | C  | T | C | Y     | intronic   | TCERG1L  | NA       | NA                         |
| 13394 | 11 | 5211994   | 5211994   | G  | T | G | K     | exonic     | HBD      | missense | NM_000519:p.Q40K           |
| 13394 | 11 | 10439826  | 10439826  | G  | T | G | K     | exonic     | AMPD3    | nonsense | NM_000480:p.E71X           |
| 13394 | 11 | 18456793  | 18456793  | T  | C | T | Y     | intronic   | LDHAL6A  | NA       | NA                         |
| 13394 | 11 | 20442537  | 20442537  | G  | T | G | K     | intronic   | PRMT3    | NA       | NA                         |
| 13394 | 11 | 22291238  | 22291238  | C  | A | C | M     | intergenic | NA       | NA       | NA                         |
| 13394 | 11 | 44045710  | 44045710  | A  | G | A | R     | UTR5       | ACCS     | NA       | NA                         |
| 13394 | 11 | 51437161  | 51437161  | A  | T | A | W     | intergenic | NA       | NA       | NA                         |
| 13394 | 11 | 55491937  | 55491937  | T  | A | T | W     | exonic     | OR10AG1  | silent   | NM_001005491:p.V193V       |
| 13394 | 11 | 57964205  | 57964205  | A  | C | A | M     | UTR5       | OR5B12   | NA       | NA                         |
| 13394 | 11 | 123495037 | 123495037 | C  | G | C | S     | intronic   | VWA5A    | NA       | NA                         |
| 13394 | 11 | 128826458 | 128826458 | C  | A | C | M     | exonic     | BARX2    | missense | NM_003658:p.P264Q          |
| 13394 | 11 | 129792056 | 129792056 | G  | A | G | R     | exonic     | ADAMTS8  | missense | NM_007037:p.A362V          |
| 13394 | 12 | 6313147   | 6313147   | T  | C | T | Y     | intronic   | TNFRSF1A | NA       | NA                         |
| 13394 | 12 | 38043241  | 38043241  | G  | C | G | S     | exonic     | KIF21A   | missense | NM_017641:p.S315R          |
| 13394 | 12 | 62551997  | 62551997  | C  | - | T | */-C  | intronic   | SRGAP1   | NA       | NA                         |
| 13394 | 12 | 99429098  | 99429098  | T  | C | T | Y     | intronic   | NR1H4    | NA       | NA                         |
| 13394 | 12 | 116169744 | 116169744 | G  | T | G | K     | intronic   | NOS1     | NA       | NA                         |
| 13394 | 12 | 120666060 | 120666060 | G  | A | G | R     | intronic   | TMEM120B | NA       | NA                         |
| 13394 | 14 | 64078590  | 64078590  | C  | A | C | M     | exonic     | HSPA2    | missense | NM_021979:p.P424T          |
| 13394 | 14 | 87486786  | 87486786  | T  | C | T | Y     | exonic     | GALC     | silent   | NM_000153:p.Q407Q          |
| 13394 | 15 | 26191700  | 26191700  | G  | T | G | K     | exonic     | HERC2    | silent   | NM_004667:p.P282P          |
| 13394 | 15 | 28193412  | 28193412  | C  | T | C | Y     | ncRNA      | FAM7A1   | NA       | NA                         |
| 13394 | 15 | 60327039  | 60327039  | G  | A | G | R     | intergenic | NA       | NA       | NA                         |
| 13394 | 15 | 71963581  | 71963581  | G  | C | G | S     | exonic     | TBC1D21  | missense | NM_153356:p.K103N          |
| 13394 | 15 | 73290122  | 73290122  | G  | A | G | R     | intronic   | C15orf39 | NA       | NA                         |
| 13394 | 15 | 83206930  | 83206930  | G  | A | G | R     | exonic     | ALPK3    | missense | NM_020778:p.C1599Y         |
| 13394 | 15 | 83207845  | 83207845  | G  | T | G | K     | exonic     | ALPK3    | missense | NM_020778:p.R1692L         |
| 13394 | 15 | 97309234  | 97309234  | C  | G | C | S     | intronic   | IGF1R    | NA       | NA                         |
| 13394 | 15 | 99409559  | 99409559  | A  | T | A | W     | exonic     | LRRK1    | missense | NM_024652:p.Y1187F         |
| 13394 | 16 | 20348555  | 20348555  | T  | C | T | Y     | exonic     | ACSM5    | silent   | NM_017888:p.P352P          |
| 13394 | 16 | 47766641  | 47766641  | C  | A | C | M     | intergenic | NA       | NA       | NA                         |
| 13394 | 16 | 80590705  | 80590705  | G  | C | G | S     | exonic     | SDR42E1  | missense | NM_145168:p.H232D          |
| 13394 | 16 | 82787584  | 82787584  | A  | G | A | R     | intronic   | ADAD2    | NA       | NA                         |
| 13394 | 17 | 7520310   | 7520310   | G  | - | A | */-G  | exonic     | TP53     | FS_del   | NM_001126114:c.102_102delC |
| 13394 | 17 | 22375391  | 22375391  | G  | A | G | R     | intergenic | NA       | NA       | NA                         |
| 13394 | 17 | 24929524  | 24929525  | AG | - | A | */-AG | intronic   | GIT1     | NA       | NA                         |
| 13394 | 17 | 27645575  | 27645575  | G  | C | G | S     | splicing   | RHBDL3   | NA       | NA                         |
| 13394 | 17 | 30873396  | 30873396  | G  | C | G | S     | intronic   | SLFN12L  | NA       | NA                         |
| 13394 | 17 | 39687558  | 39687558  | T  | C | T | Y     | splicing   | SLC4A1   | NA       | NA                         |
| 13394 | 17 | 56800662  | 56800662  | C  | G | C | S     | intronic   | BCAS3    | NA       | NA                         |
| 13394 | 17 | 59981631  | 59981631  | G  | C | G | S     | intronic   | SMURF2   | NA       | NA                         |
| 13394 | 17 | 68700859  | 68700859  | C  | G | C | S     | exonic     | COG1     | missense | NM_018714:p.A19G           |
| 13394 | 17 | 70743419  | 70743419  | T  | A | T | W     | UTR3       | NUP85    | NA       | NA                         |
| 13394 | 18 | 99200     | 99200     | A  | C | A | M     | ncRNA      | ROCK1P1  | NA       | NA                         |

|       |    |           |           |       |   |   |          |            |         |          |                       |
|-------|----|-----------|-----------|-------|---|---|----------|------------|---------|----------|-----------------------|
| 13394 | 18 | 16771423  | 16771423  | T     | G | T | K        | intergenic | NA      | NA       | NA                    |
| 13394 | 18 | 27180162  | 27180162  | A     | G | A | R        | intronic   | DSG1    | NA       | NA                    |
| 13394 | 18 | 30718652  | 30718652  | G     | T | G | K        | intronic   | DTNA    | NA       | NA                    |
| 13394 | 18 | 45615668  | 45615668  | T     | C | T | Y        | intronic   | MYO5B   | NA       | NA                    |
| 13394 | 19 | 9939643   | 9939643   | G     | A | G | R        | intronic   | COL5A3  | NA       | NA                    |
| 13394 | 19 | 32425233  | 32425233  | T     | A | T | W        | intergenic | NA      | NA       | NA                    |
| 13394 | 19 | 47925662  | 47925662  | G     | A | G | R        | intronic   | PSG3    | NA       | NA                    |
| 13394 | 19 | 51308647  | 51308647  | C     | A | C | M        | intergenic | NA      | NA       | NA                    |
| 13394 | 19 | 58577851  | 58577851  | C     | T | C | Y        | ncRNA      | ZNF525  | NA       | NA                    |
| 13394 | 19 | 59417894  | 59417894  | C     | T | C | Y        | intronic   | LILRB3  | NA       | NA                    |
| 13394 | 19 | 59970480  | 59970480  | C     | G | C | S        | intronic   | KIR3DP1 | NA       | NA                    |
| 13394 | 20 | 1405926   | 1405926   | T     | C | T | Y        | intronic   | SIRPB2  | NA       | NA                    |
| 13394 | 20 | 11549803  | 11549803  | G     | T | G | K        | intergenic | NA      | NA       | NA                    |
| 13394 | 20 | 30248186  | 30248186  | G     | A | G | R        | exonic     | PLAGL2  | silent   | NM_002657:p.L407L     |
| 13394 | 20 | 35065711  | 35065711  | T     | C | T | Y        | intronic   | RBL1    | NA       | NA                    |
| 13394 | 20 | 36580095  | 36580095  | C     | T | C | Y        | intronic   | RALGAPB | NA       | NA                    |
| 13394 | 21 | 10037135  | 10037135  | C     | G | C | S        | intergenic | NA      | NA       | NA                    |
| 13394 | 21 | 10146079  | 10146079  | C     | A | C | M        | intergenic | NA      | NA       | NA                    |
| 13394 | 21 | 20053821  | 20053821  | C     | T | C | Y        | intergenic | NA      | NA       | NA                    |
| 13394 | 21 | 25881860  | 25881860  | G     | A | G | R        | intronic   | MRPL39  | NA       | NA                    |
| 13394 | 21 | 46356637  | 46356637  | G     | C | G | S        | exonic     | COL6A2  | missense | NM_058174:p.Q144H     |
| 13394 | 22 | 15906017  | 15906017  | A     | G | A | R        | ncRNA      | CECR7   | NA       | NA                    |
| 13394 | 22 | 37554250  | 37554250  | C     | T | C | Y        | exonic     | NPTXR   | missense | NM_014293:p.E280K     |
| 13394 | X  | 8957482   | 8957482   | C     | T | C | Y        | intronic   | FAM9B   | NA       | NA                    |
| 13394 | X  | 48537404  | 48537404  | C     | T | C | Y        | exonic     | GATA1   | silent   | NM_002049:p.S377S     |
| 13394 | X  | 74565796  | 74565796  | C     | G | C | S        | intronic   | ZDHHC15 | NA       | NA                    |
| 13394 | X  | 81648556  | 81648556  | C     | A | C | M        | intergenic | NA      | NA       | NA                    |
| 13394 | X  | 100798410 | 100798410 | G     | A | G | R        | exonic     | ARMCX2  | missense | NM_177949:p.A274V     |
| 13394 | Y  | 11756702  | 11756702  | A     | G | A | R        | intergenic | NA      | NA       | NA                    |
| 13394 | Y  | 57411299  | 57411299  | G     | C | G | S        | intergenic | NA      | NA       | NA                    |
| 13542 | 1  | 13095618  | 13095618  | T     | A | T | W        | intergenic | NA      | NA       | NA                    |
| 13542 | 1  | 54200653  | 54200653  | G     | C | G | S        | exonic     | LRRC42  | missense | NM_052940:p.E304Q     |
| 13542 | 1  | 57383576  | 57383576  | C     | A | C | M        | exonic     | DAB1    | missense | NM_021080:p.C61F      |
| 13542 | 1  | 60335857  | 60335857  | C     | T | C | Y        | intergenic | NA      | NA       | NA                    |
| 13542 | 1  | 70030416  | 70030416  | G     | C | G | S        | exonic     | LRRC7   | missense | NM_020794:p.D98H      |
| 13542 | 1  | 70593447  | 70593447  | G     | A | G | R        | exonic     | HHLA3   | missense | NM_001036645:p.M75I   |
| 13542 | 1  | 70668055  | 70668055  | G     | T | G | K        | intronic   | CTH     | NA       | NA                    |
| 13542 | 1  | 74421811  | 74421811  | C     | A | C | M        | exonic     | LRRIQ3  | missense | NM_001105659:p.C49F   |
| 13542 | 1  | 101509170 | 101509170 | C     | A | C | M        | intergenic | NA      | NA       | NA                    |
| 13542 | 1  | 101509171 | 101509171 | A     | G | A | R        | intergenic | NA      | NA       | NA                    |
| 13542 | 1  | 116880007 | 116880007 | A     | T | A | W        | ncRNA      | CD58    | NA       | NA                    |
| 13542 | 1  | 116880008 | 116880008 | A     | T | A | W        | ncRNA      | CD58    | NA       | NA                    |
| 13542 | 1  | 117712508 | 117712512 | TTCAA | - | C | */-TTCAA | exonic     | MAN1A2  | FS_del   | NM_006699:p.60_62del  |
| 13542 | 1  | 141481476 | 141481476 | G     | A | G | R        | intergenic | NA      | NA       | NA                    |
| 13542 | 1  | 141482012 | 141482012 | G     | A | G | R        | intergenic | NA      | NA       | NA                    |
| 13542 | 1  | 141527398 | 141527398 | G     | A | G | R        | intergenic | NA      | NA       | NA                    |
| 13542 | 1  | 141727599 | 141727599 | G     | A | G | R        | intergenic | NA      | NA       | NA                    |
| 13542 | 1  | 142206543 | 142206543 | T     | G | T | K        | intergenic | NA      | NA       | NA                    |
| 13542 | 1  | 142382204 | 142382204 | T     | G | T | K        | intergenic | NA      | NA       | NA                    |
| 13542 | 1  | 143574754 | 143574754 | T     | C | T | Y        | exonic     | PDE4DIP | silent   | NM_001198834:p.K2002K |
| 13542 | 1  | 147358220 | 147358220 | C     | T | C | Y        | intergenic | NA      | NA       | NA                    |
| 13542 | 1  | 147366441 | 147366441 | C     | A | C | M        | intergenic | NA      | NA       | NA                    |
| 13542 | 1  | 147372697 | 147372697 | C     | T | C | Y        | intergenic | NA      | NA       | NA                    |
| 13542 | 1  | 148459696 | 148459696 | G     | T | G | K        | intronic   | ANP32E  | NA       | NA                    |
| 13542 | 1  | 150276038 | 150276038 | G     | C | G | S        | UTR5       | S100A11 | NA       | NA                    |
| 13542 | 1  | 150458174 | 150458174 | G     | A | G | R        | exonic     | HRNR    | missense | NM_001009931:p.S852L  |
| 13542 | 1  | 151379548 | 151379548 | A     | T | A | W        | ncRNA      | SPRR2C  | NA       | NA                    |
| 13542 | 1  | 154885048 | 154885048 | G     | A | G | R        | exonic     | BCAN    | silent   | NM_198427:p.Q278Q     |
| 13542 | 1  | 159762068 | 159762068 | G     | C | G | S        | exonic     | HSPA6   | missense | NM_002155:p.Q332H     |
| 13542 | 1  | 159762807 | 159762807 | G     | T | G | K        | exonic     | HSPA6   | missense | NM_002155:p.V579F     |
| 13542 | 1  | 166686103 | 166686103 | G     | A | G | R        | intergenic | NA      | NA       | NA                    |
| 13542 | 1  | 194887810 | 194887810 | A     | T | A | W        | UTR5       | CFH     | NA       | NA                    |
| 13542 | 1  | 199297072 | 199297072 | G     | C | G | S        | exonic     | CACNA15 | silent   | NM_000069:p.T1067T    |
| 13542 | 1  | 202083412 | 202083412 | G     | C | G | S        | exonic     | ZC3H11A | missense | NM_014827:p.R507P     |
| 13542 | 1  | 202705205 | 202705205 | G     | C | G | S        | exonic     | PIK3C2B | missense | NM_002646:p.P117A     |
| 13542 | 1  | 203954110 | 203954110 | T     | C | T | Y        | exonic     | NUCKS1  | missense | NM_022731:p.K218R     |
| 13542 | 1  | 209657857 | 209657857 | G     | C | G | S        | ncRNA      | C1orf97 | NA       | NA                    |
| 13542 | 1  | 212892851 | 212892851 | A     | T | A | W        | exonic     | CENPF   | missense | NM_016343:p.S2740C    |
| 13542 | 1  | 214238752 | 214238752 | C     | T | Y |          | intronic   | USH2A   | NA       | NA                    |
| 13542 | 1  | 220781928 | 220781928 | C     | A | C | M        | intronic   | HHIPL2  | NA       | NA                    |
| 13542 | 1  | 224896374 | 224896374 | G     | C | G | S        | exonic     | ITPKB   | missense | NM_002221:p.I774M     |
| 13542 | 1  | 241560459 | 241560459 | T     | C | T | Y        | intronic   | SDCCAG8 | NA       | NA                    |
| 13542 | 1  | 245836265 | 245836265 | A     | T | A | W        | exonic     | OR2G3   | missense | NM_001001914:p.Y252F  |
| 13542 | 1  | 246351927 | 246351927 | G     | A | G | R        | upstream   | OR2M1P  | NA       | NA                    |
| 13542 | 1  | 246636973 | 246636973 | A     | G | A | R        | exonic     | OR2T1   | missense | NM_030904:p.K352R     |
| 13542 | 2  | 14056817  | 14056817  | A     | C | A | M        | intergenic | NA      | NA       | NA                    |
| 13542 | 2  | 43885862  | 43885862  | C     | T | C | Y        | exonic     | DYNC2L1 | silent   | NM_001193464:p.V323V  |
| 13542 | 2  | 67483870  | 67483870  | A     | T | A | W        | exonic     | ETAA1   | silent   | NM_019002:p.T184T     |
| 13542 | 2  | 71118564  | 71118564  | C     | A | C | M        | intergenic | NA      | NA       | NA                    |

|       |   |           |           |   |   |   |      |            |             |          |                      |
|-------|---|-----------|-----------|---|---|---|------|------------|-------------|----------|----------------------|
| 13542 | 2 | 71736785  | 71736785  | C | A | C | M    | intronic   | DYSF        | NA       | NA                   |
| 13542 | 2 | 73847175  | 73847175  | G | A | G | R    | exonic     | DUSP11      | silent   | NM_003584:p.L271L    |
| 13542 | 2 | 86622901  | 86622901  | C | G | C | S    | exonic     | RNF103-VPS; | missense | NM_016079:p.D31H     |
| 13542 | 2 | 88164897  | 88164897  | G | T | G | K    | intronic   | SMYD1       | NA       | NA                   |
| 13542 | 2 | 90976553  | 90976553  | G | T | G | K    | intergenic | NA          | NA       | NA                   |
| 13542 | 2 | 94767361  | 94767361  | A | T | A | W    | intergenic | NA          | NA       | NA                   |
| 13542 | 2 | 96382733  | 96382733  | C | A | C | M    | intronic   | NCAPH       | NA       | NA                   |
| 13542 | 2 | 100574055 | 100574055 | C | A | C | M    | intergenic | NA          | NA       | NA                   |
| 13542 | 2 | 132098058 | 132098058 | G | T | G | K    | ncRNA      | POTEKP      | NA       | NA                   |
| 13542 | 2 | 132742406 | 132742406 | G | T | G | K    | intergenic | NA          | NA       | NA                   |
| 13542 | 2 | 139043096 | 139043096 | A | T | A | W    | exonic     | SPOPL       | silent   | NM_001001664:p.P385P |
| 13542 | 2 | 162737742 | 162737742 | C | T | C | Y    | intronic   | FAP         | NA       | NA                   |
| 13542 | 2 | 168732055 | 168732055 | C | A | C | M    | splicing   | STK39       | missense | NM_013233:p.G144C    |
| 13542 | 2 | 173802644 | 173802644 | A | G | A | R    | ncRNA      | LOC339751   | NA       | NA                   |
| 13542 | 2 | 183329236 | 183329236 | A | G | A | R    | intronic   | DNAJC10     | NA       | NA                   |
| 13542 | 2 | 189583130 | 189583130 | C | T | C | Y    | intronic   | COL3A1      | NA       | NA                   |
| 13542 | 2 | 189634658 | 189634658 | T | A | T | W    | intronic   | COL5A2      | NA       | NA                   |
| 13542 | 2 | 201224015 | 201224015 | T | A | T | W    | exonic     | AOX1        | missense | NM_001159:p.I974N    |
| 13542 | 2 | 212252159 | 212252159 | G | A | G | R    | intronic   | ERBB4       | NA       | NA                   |
| 13542 | 2 | 227682177 | 227682177 | T | A | T | W    | intronic   | COL4A4      | NA       | NA                   |
| 13542 | 3 | 3056782   | 3056782   | A | G | A | R    | exonic     | CNTN4       | missense | NM_175613:p.Y414C    |
| 13542 | 3 | 26032472  | 26032472  | C | A | C | M    | intergenic | NA          | NA       | NA                   |
| 13542 | 3 | 39160796  | 39160796  | G | A | G | R    | exonic     | CSRNP1      | nonsense | NM_033027:p.R206X    |
| 13542 | 3 | 39660684  | 39660684  | G | A | G | R    | intergenic | NA          | NA       | NA                   |
| 13542 | 3 | 42704789  | 42704789  | A | G | A | R    | exonic     | KBTBD5      | missense | NM_152393:p.Y435C    |
| 13542 | 3 | 43383420  | 43383420  | C | A | C | M    | exonic     | ANO10       | silent   | NM_018075:p.G655G    |
| 13542 | 3 | 44842782  | 44842782  | A | G | A | R    | intronic   | KIF15       | NA       | NA                   |
| 13542 | 3 | 44857600  | 44857600  | C | A | C | M    | exonic     | KIF15       | missense | NM_020242:p.H1151N   |
| 13542 | 3 | 46459930  | 46459930  | A | G | A | R    | intronic   | LTF         | NA       | NA                   |
| 13542 | 3 | 95277756  | 95277756  | G | T | G | K    | intronic   | NSUN3       | NA       | NA                   |
| 13542 | 3 | 99440515  | 99440515  | C | T | C | Y    | intergenic | NA          | NA       | NA                   |
| 13542 | 3 | 108308106 | 108308106 | A | T | A | W    | intergenic | NA          | NA       | NA                   |
| 13542 | 3 | 110256429 | 110256429 | T | C | T | Y    | intronic   | MORC1       | NA       | NA                   |
| 13542 | 3 | 114778366 | 114778366 | A | G | A | R    | intronic   | SIDT1       | NA       | NA                   |
| 13542 | 3 | 120837246 | 120837246 | G | A | G | R    | intergenic | NA          | NA       | NA                   |
| 13542 | 3 | 125834126 | 125834126 | G | T | G | K    | exonic     | KALRN       | missense | NM_007064:p.K85N     |
| 13542 | 3 | 141889967 | 141889967 | C | A | C | M    | exonic     | TRIM42      | missense | NM_152616:p.Q585K    |
| 13542 | 3 | 161612663 | 161612663 | A | C | A | M    | intronic   | SMC4        | NA       | NA                   |
| 13542 | 3 | 161786016 | 161786016 | C | T | C | Y    | intergenic | NA          | NA       | NA                   |
| 13542 | 3 | 180426686 | 180426686 | A | G | A | R    | intronic   | PIK3CA      | NA       | NA                   |
| 13542 | 3 | 181098721 | 181098721 | C | T | C | Y    | exonic     | PEX5L       | missense | NM_016559:p.G34D     |
| 13542 | 4 | 539189    | 539189    | T | C | T | Y    | intergenic | NA          | NA       | NA                   |
| 13542 | 4 | 985294    | 985294    | G | A | G | R    | exonic     | IDUA        | missense | NM_000203:p.E178K    |
| 13542 | 4 | 985327    | 985327    | G | C | G | S    | exonic     | IDUA        | missense | NM_000203:p.D189H    |
| 13542 | 4 | 4559997   | 4559997   | T | A | T | W    | intronic   | STX18       | NA       | NA                   |
| 13542 | 4 | 9009992   | 9009992   | C | A | C | M    | intergenic | NA          | NA       | NA                   |
| 13542 | 4 | 39449110  | 39449110  | C | T | C | Y    | intronic   | UBE2K       | NA       | NA                   |
| 13542 | 4 | 48799400  | 48799400  | G | A | G | R    | intergenic | NA          | NA       | NA                   |
| 13542 | 4 | 48809044  | 48809044  | C | A | C | M    | intergenic | NA          | NA       | NA                   |
| 13542 | 4 | 48816869  | 48816869  | C | T | C | Y    | intergenic | NA          | NA       | NA                   |
| 13542 | 4 | 48817690  | 48817690  | G | T | G | K    | intergenic | NA          | NA       | NA                   |
| 13542 | 4 | 64957634  | 64957634  | C | T | C | Y    | exonic     | TECRL       | missense | NM_001010874:p.E11K  |
| 13542 | 4 | 83566334  | 83566334  | A | T | A | W    | ncRNA      | HNRPL       | NA       | NA                   |
| 13542 | 4 | 88799385  | 88799385  | - | T | C | */+T | intronic   | DMP1        | NA       | NA                   |
| 13542 | 4 | 95336138  | 95336138  | C | T | C | Y    | intergenic | NA          | NA       | NA                   |
| 13542 | 4 | 120462785 | 120462785 | A | G | A | R    | upstream   | FABP2       | NA       | NA                   |
| 13542 | 4 | 130233655 | 130233655 | - | A | C | */+A | intronic   | SCLT1       | NA       | NA                   |
| 13542 | 4 | 155885520 | 155885520 | C | A | C | M    | intronic   | LRAT        | NA       | NA                   |
| 13542 | 4 | 159769356 | 159769356 | G | - | T | */-G | intronic   | RXFP1       | NA       | NA                   |
| 13542 | 4 | 159778642 | 159778642 | A | G | A | R    | exonic     | RXFP1       | missense | NM_021634:p.Q335R    |
| 13542 | 4 | 189161626 | 189161626 | A | G | A | R    | exonic     | ZFP42       | missense | NM_174900:p.K224R    |
| 13542 | 4 | 191117570 | 191117570 | A | T | A | W    | intronic   | FRG1        | NA       | NA                   |
| 13542 | 5 | 3329467   | 3329467   | G | A | G | R    | intergenic | NA          | NA       | NA                   |
| 13542 | 5 | 7349376   | 7349376   | A | G | A | R    | intergenic | NA          | NA       | NA                   |
| 13542 | 5 | 7944579   | 7944579   | A | G | A | R    | intronic   | MTRR        | NA       | NA                   |
| 13542 | 5 | 24547165  | 24547165  | G | A | G | R    | intronic   | CDH10       | NA       | NA                   |
| 13542 | 5 | 35730245  | 35730245  | C | T | C | Y    | intronic   | SPEF2       | NA       | NA                   |
| 13542 | 5 | 41349597  | 41349597  | G | T | G | K    | exonic     | PLCXD3      | missense | NM_001005473:p.T282K |
| 13542 | 5 | 74052669  | 74052669  | C | G | C | S    | intronic   | HEXB        | NA       | NA                   |
| 13542 | 5 | 76005257  | 76005257  | C | A | C | M    | intronic   | IQGAP2      | NA       | NA                   |
| 13542 | 5 | 94831455  | 94831455  | G | T | G | K    | intronic   | TTC37       | NA       | NA                   |
| 13542 | 5 | 131036112 | 131036112 | C | A | C | M    | exonic     | FNIP1       | nonsense | NM_001008738:p.G614X |
| 13542 | 5 | 132260182 | 132260182 | G | T | G | K    | exonic     | AFF4        | nonsense | NM_014423:p.S680X    |
| 13542 | 5 | 140461639 | 140461639 | G | A | G | R    | exonic     | PCDHB3      | missense | NM_018937:p.A408T    |
| 13542 | 5 | 140517330 | 140517330 | G | A | G | R    | ncRNA      | PCDHB17     | NA       | NA                   |
| 13542 | 5 | 140553214 | 140553214 | T | G | T | K    | exonic     | PCDHB10     | missense | NM_018930:p.F302C    |
| 13542 | 5 | 141013648 | 141013648 | T | A | T | W    | UTR3       | ARAP3       | NA       | NA                   |
| 13542 | 5 | 146066382 | 146066382 | C | G | C | S    | intronic   | PPP2R2B     | NA       | NA                   |
| 13542 | 5 | 146977916 | 146977916 | A | T | A | W    | intronic   | JAKMIP2     | NA       | NA                   |

|       |    |           |           |   |   |   |      |            |           |          |                       |
|-------|----|-----------|-----------|---|---|---|------|------------|-----------|----------|-----------------------|
| 13542 | 5  | 150090972 | 150090972 | T | A | T | W    | intronic   | DCTN4     | NA       | NA                    |
| 13542 | 5  | 151029586 | 151029586 | C | T | C | Y    | intronic   | SPARC     | NA       | NA                    |
| 13542 | 5  | 154852367 | 154852367 | T | A | T | W    | intergenic | NA        | NA       | NA                    |
| 13542 | 5  | 154852368 | 154852368 | T | A | T | W    | intergenic | NA        | NA       | NA                    |
| 13542 | 5  | 159613198 | 159613198 | C | A | C | M    | exonic     | CCNJL     | missense | NM_024565:p.R358L     |
| 13542 | 6  | 3977627   | 3977627   | A | G | A | R    | exonic     | PRPF4B    | missense | NM_003913:p.R293G     |
| 13542 | 6  | 26025218  | 26025218  | A | T | A | W    | exonic     | SLC17A2   | missense | NM_005835:p.S242R     |
| 13542 | 6  | 26308119  | 26308119  | C | A | C | M    | exonic     | HIST1H2BF | silent   | NM_003522:p.A118A     |
| 13542 | 6  | 29751828  | 29751828  | G | C | G | S    | intronic   | ZFP57     | NA       | NA                    |
| 13542 | 6  | 31936332  | 31936332  | C | A | C | M    | exonic     | NEU1      | missense | NM_000434:p.G221W     |
| 13542 | 6  | 33516680  | 33516680  | C | T | C | Y    | exonic     | SYNGAP1   | missense | NM_006772:p.L625F     |
| 13542 | 6  | 43328469  | 43328469  | G | T | G | K    | exonic     | TTBK1     | silent   | NM_032538:p.G41G      |
| 13542 | 6  | 56977510  | 56977510  | A | G | A | R    | intronic   | BEND6     | NA       | NA                    |
| 13542 | 6  | 74139684  | 74139684  | C | A | C | M    | intergenic | NA        | NA       | NA                    |
| 13542 | 6  | 74420292  | 74420292  | G | A | G | R    | exonic     | SLC17A5   | silent   | NM_012434:p.G13G      |
| 13542 | 6  | 88211337  | 88211337  | G | C | G | S    | intronic   | C6orf165  | NA       | NA                    |
| 13542 | 6  | 97081081  | 97081081  | A | T | A | W    | intronic   | KIAA0776  | NA       | NA                    |
| 13542 | 6  | 97160504  | 97160504  | C | G | C | S    | exonic     | FHL5      | missense | NM_001170807:p.R114G  |
| 13542 | 6  | 117716586 | 117716586 | C | A | C | M    | exonic     | ROS1      | missense | NM_002944:p.R2269L    |
| 13542 | 6  | 131318051 | 131318051 | G | A | G | R    | exonic     | EPB41L2   | nonsense | NM_001199389:p.Q198X  |
| 13542 | 6  | 132037094 | 132037094 | G | T | G | K    | exonic     | ENPP3     | missense | NM_005021:p.A248S     |
| 13542 | 6  | 146286537 | 146286537 | C | T | C | Y    | exonic     | SHPRH     | silent   | NM_001042683:p.Q1160Q |
| 13542 | 6  | 153336002 | 153336002 | C | T | C | Y    | intronic   | FBXO5     | NA       | NA                    |
| 13542 | 6  | 157563827 | 157563827 | T | C | T | Y    | exonic     | ARID1B    | silent   | NM_020732:p.N1469N    |
| 13542 | 6  | 160940684 | 160940684 | G | A | G | R    | intronic   | LPA       | NA       | NA                    |
| 13542 | 6  | 168795740 | 168795740 | G | A | G | R    | exonic     | SMOC2     | missense | NM_022138:p.V409M     |
| 13542 | 6  | 170437197 | 170437197 | G | A | G | R    | intronic   | DLL1      | NA       | NA                    |
| 13542 | 7  | 2400234   | 2400234   | G | A | G | R    | intergenic | NA        | NA       | NA                    |
| 13542 | 7  | 6703800   | 6703800   | T | C | T | Y    | intronic   | ZNF12     | NA       | NA                    |
| 13542 | 7  | 6737960   | 6737960   | A | G | A | R    | intergenic | NA        | NA       | NA                    |
| 13542 | 7  | 30058957  | 30058957  | A | G | A | R    | exonic     | PLEKHA8   | missense | NM_032639:p.E249G     |
| 13542 | 7  | 43513357  | 43513357  | T | A | T | W    | exonic     | HECW1     | missense | NM_015052:p.F1243Y    |
| 13542 | 7  | 45668218  | 45668218  | G | T | G | K    | exonic     | ADCY1     | silent   | NM_021116:p.P495P     |
| 13542 | 7  | 62991592  | 62991592  | G | T | G | K    | intergenic | NA        | NA       | NA                    |
| 13542 | 7  | 65254645  | 65254645  | G | T | G | K    | exonic     | CRCP      | nonsense | NM_014478:p.E105X     |
| 13542 | 7  | 71874658  | 71874658  | T | C | T | Y    | intronic   | TYW1B     | NA       | NA                    |
| 13542 | 7  | 87630347  | 87630347  | A | G | A | R    | exonic     | ADAM22    | silent   | NM_016351:p.L664L     |
| 13542 | 7  | 90194129  | 90194129  | G | T | G | K    | intronic   | CDK14     | NA       | NA                    |
| 13542 | 7  | 100017928 | 100017928 | C | G | C | S    | exonic     | LRCH4     | missense | NM_002319:p.R104T     |
| 13542 | 7  | 107408439 | 107408439 | C | A | C | M    | exonic     | LAMB1     | nonsense | NM_002291:p.G244X     |
| 13542 | 7  | 127836822 | 127836822 | C | A | C | M    | intronic   | IMPDH1    | NA       | NA                    |
| 13542 | 7  | 142284661 | 142284661 | C | T | C | Y    | exonic     | TRPV6     | missense | NM_018646:p.R180Q     |
| 13542 | 7  | 143288843 | 143288843 | C | A | C | M    | exonic     | OR2F1     | missense | NM_012369:p.P283T     |
| 13542 | 8  | 41641662  | 41641662  | C | T | C | Y    | exonic     | ANK1      | missense | NM_001142445:p.V13M   |
| 13542 | 8  | 56698215  | 56698215  | G | T | G | K    | intergenic | NA        | NA       | NA                    |
| 13542 | 8  | 86224364  | 86224364  | - | A | G | */+A | exonic     | LRRCC1    | FS_ins   | NM_033402:p.E404fs    |
| 13542 | 8  | 86224369  | 86224369  | G | A | G | R    | exonic     | LRRCC1    | silent   | NM_033402:p.K405K     |
| 13542 | 8  | 86224370  | 86224370  | C | T | C | Y    | exonic     | LRRCC1    | missense | NM_033402:p.P406S     |
| 13542 | 8  | 87752363  | 87752363  | G | A | G | R    | exonic     | CNGB3     | missense | NM_019098:p.R140C     |
| 13542 | 8  | 105430329 | 105430329 | A | T | A | W    | exonic     | TM7SF4    | missense | NM_030788:p.M125L     |
| 13542 | 8  | 113377203 | 113377203 | A | G | A | R    | intronic   | CSMD3     | NA       | NA                    |
| 13542 | 8  | 113767075 | 113767075 | C | A | C | M    | exonic     | CSMD3     | missense | NM_198123:p.G740W     |
| 13542 | 8  | 117948218 | 117948218 | T | A | T | W    | intronic   | RAD21     | NA       | NA                    |
| 13542 | 8  | 142223524 | 142223524 | C | G | C | S    | exonic     | DENND3    | missense | NM_014957:p.P160R     |
| 13542 | 9  | 2071948   | 2071948   | G | A | G | R    | exonic     | SMARCA2   | missense | NM_139045:p.M767I     |
| 13542 | 9  | 3215139   | 3215139   | G | C | G | S    | exonic     | RFX3      | missense | NM_134428:p.P718R     |
| 13542 | 9  | 67890131  | 67890131  | C | T | C | Y    | intergenic | NA        | NA       | NA                    |
| 13542 | 9  | 67893106  | 67893106  | G | A | G | R    | intergenic | NA        | NA       | NA                    |
| 13542 | 9  | 67921464  | 67921464  | G | T | G | K    | ncRNA      | LOC642236 | NA       | NA                    |
| 13542 | 9  | 71931047  | 71931047  | C | A | C | M    | exonic     | MAMDC2    | silent   | NM_153267:p.R266R     |
| 13542 | 9  | 71931050  | 71931050  | G | A | G | R    | exonic     | MAMDC2    | missense | NM_153267:p.D267N     |
| 13542 | 9  | 83392541  | 83392541  | C | G | C | S    | exonic     | TLE1      | missense | NM_005077:p.G618R     |
| 13542 | 9  | 85053063  | 85053063  | C | G | C | S    | exonic     | FRMD3     | missense | NM_174938:p.E462Q     |
| 13542 | 9  | 85696184  | 85696184  | A | T | A | W    | exonic     | KIF27     | missense | NM_017576:p.L552Q     |
| 13542 | 9  | 89937544  | 89937544  | G | C | G | S    | intronic   | FAM75C2   | NA       | NA                    |
| 13542 | 9  | 108918014 | 108918014 | G | A | G | R    | intergenic | NA        | NA       | NA                    |
| 13542 | 9  | 111210542 | 111210542 | A | C | A | M    | ncRNA      | PTPN3     | NA       | NA                    |
| 13542 | 9  | 116445457 | 116445457 | C | A | C | M    | UTR3       | C9orf91   | NA       | NA                    |
| 13542 | 9  | 129750293 | 129750293 | G | A | G | R    | exonic     | FAM102A   | missense | NM_203305:p.P23L      |
| 13542 | 9  | 134193586 | 134193586 | C | T | C | Y    | exonic     | SETX      | missense | NM_015046:p.E1074K    |
| 13542 | 9  | 137517853 | 137517853 | C | T | C | Y    | exonic     | KIAA0649  | missense | NM_014811:p.P559L     |
| 13542 | 10 | 15131863  | 15131863  | G | T | G | K    | intronic   | OLAH      | NA       | NA                    |
| 13542 | 10 | 16566716  | 16566716  | G | T | G | K    | exonic     | PTER      | silent   | NM_030664:p.T109T     |
| 13542 | 10 | 18127637  | 18127637  | G | A | G | R    | intergenic | NA        | NA       | NA                    |
| 13542 | 10 | 26895904  | 26895904  | G | C | G | S    | exonic     | APBB1IP   | missense | NM_019043:p.K494N     |
| 13542 | 10 | 42248682  | 42248682  | T | A | T | W    | intergenic | NA        | NA       | NA                    |
| 13542 | 10 | 42248683  | 42248683  | C | G | C | S    | intergenic | NA        | NA       | NA                    |
| 13542 | 10 | 47990495  | 47990495  | C | T | C | Y    | UTR5       | ZNF488    | NA       | NA                    |
| 13542 | 10 | 51438682  | 51438682  | A | C | A | M    | exonic     | AGAP6     | missense | NM_001077665:p.K264T  |

|       |    |           |           |      |   |   |         |            |           |          |                        |  |
|-------|----|-----------|-----------|------|---|---|---------|------------|-----------|----------|------------------------|--|
| 13542 | 10 | 64651946  | 64651946  | T    | C | T | Y       | intronic   | JMJD1C    | NA       | NA                     |  |
| 13542 | 10 | 75535004  | 75535007  | CCGA | - | T | *-/CCGA | exonic     | VCL       | FS_del   | NM_014000:p.774_775del |  |
| 13542 | 10 | 75553989  | 75553989  | C    | T | C | Y       | intronic   | AP3M1     | NA       | NA                     |  |
| 13542 | 10 | 78317328  | 78317328  | G    | T | G | K       | intronic   | KCNMA1    | NA       | NA                     |  |
| 13542 | 10 | 78469424  | 78469424  | G    | A | G | R       | intronic   | KCNMA1    | NA       | NA                     |  |
| 13542 | 10 | 95033852  | 95033852  | C    | T | C | Y       | intergenic | NA        | NA       | NA                     |  |
| 13542 | 10 | 118448098 | 118448098 | C    | A | C | M       | intronic   | HSPA12A   | NA       | NA                     |  |
| 13542 | 11 | 271741    | 271741    | A    | C | A | M       | exonic     | NLRP6     | silent   | NM_138329:p.G669G      |  |
| 13542 | 11 | 5418743   | 5418743   | T    | C | T | Y       | exonic     | OR51I1    | missense | NM_001005288:p.D193G   |  |
| 13542 | 11 | 5431442   | 5431442   | C    | A | C | M       | exonic     | OR51I2    | silent   | NM_001004754:p.R50R    |  |
| 13542 | 11 | 10782145  | 10782145  | G    | A | G | R       | exonic     | EIF4G2    | silent   | NM_001042559:p.L193L   |  |
| 13542 | 11 | 13399826  | 13399826  | C    | A | C | M       | exonic     | BTBD10    | silent   | NM_032320:p.T79T       |  |
| 13542 | 11 | 18240268  | 18240268  | C    | A | C | M       | intergenic | NA        | NA       | NA                     |  |
| 13542 | 11 | 49383427  | 49383427  | T    | A | T | W       | intergenic | NA        | NA       | NA                     |  |
| 13542 | 11 | 50336761  | 50336761  | C    | T | C | Y       | downstream | LOC646813 | NA       | NA                     |  |
| 13542 | 11 | 55438404  | 55438404  | A    | T | A | W       | exonic     | OR5W2     | silent   | NM_001001960:p.T77T    |  |
| 13542 | 11 | 55503870  | 55503870  | G    | A | G | R       | ncRNA      | OR7E5P    | NA       | NA                     |  |
| 13542 | 11 | 55814548  | 55814548  | C    | A | C | M       | exonic     | OR8H1     | missense | NM_001005199:p.M189I   |  |
| 13542 | 11 | 59028208  | 59028208  | T    | A | T | W       | exonic     | OR4D11    | missense | NM_001004706:p.L195H   |  |
| 13542 | 11 | 85401061  | 85401061  | T    | - | A | *-/T    | exonic     | PICALM    | FS_del   | NM_007166:p.N190fs     |  |
| 13542 | 11 | 105294748 | 105294748 | A    | G | A | R       | exonic     | GRIA4     | missense | NM_000829:p.H457R      |  |
| 13542 | 11 | 107904106 | 107904106 | T    | G | T | K       | exonic     | EXPH5     | silent   | NM_015065:p.A153A      |  |
| 13542 | 11 | 123103312 | 123103312 | C    | A | C | M       | intronic   | ZNF202    | NA       | NA                     |  |
| 13542 | 11 | 123352861 | 123352861 | G    | T | G | K       | exonic     | OR10S1    | silent   | NM_001004474:p.R250R   |  |
| 13542 | 11 | 123405914 | 123405914 | C    | G | C | S       | exonic     | OR10G8    | missense | NM_001004464:p.I125M   |  |
| 13542 | 12 | 733449    | 733449    | C    | T | C | Y       | exonic     | WNK19     | missense | NM_018979:p.P153S      |  |
| 13542 | 12 | 16595421  | 16595421  | G    | C | G | S       | UTR3       | LMO3      | NA       | NA                     |  |
| 13542 | 12 | 22557460  | 22557460  | C    | G | C | S       | intronic   | KIAA0528  | NA       | NA                     |  |
| 13542 | 12 | 26600489  | 26600489  | T    | C | T | Y       | exonic     | ITPR2     | silent   | NM_002223:p.E1636E     |  |
| 13542 | 12 | 27677677  | 27677677  | G    | T | G | K       | intronic   | PPF1BP1   | NA       | NA                     |  |
| 13542 | 12 | 33470346  | 33470346  | G    | T | G | K       | exonic     | SYT10     | nonsense | NM_198992:p.S168X      |  |
| 13542 | 12 | 38050105  | 38050105  | -    | A | T | */+A    | intronic   | KIF21A    | NA       | NA                     |  |
| 13542 | 12 | 39015017  | 39015017  | T    | A | T | W       | intronic   | LRRK2     | NA       | NA                     |  |
| 13542 | 12 | 39039256  | 39039256  | G    | T | G | K       | intronic   | LRRK2     | NA       | NA                     |  |
| 13542 | 12 | 48005912  | 48005912  | G    | T | G | K       | exonic     | TROAP     | missense | NM_005480:p.C204F      |  |
| 13542 | 12 | 48550649  | 48550649  | G    | T | G | K       | exonic     | FAIM2     | missense | NM_012306:p.P286T      |  |
| 13542 | 12 | 51171213  | 51171213  | C    | T | C | Y       | exonic     | KRT6A     | missense | NM_005554:p.E256K      |  |
| 13542 | 12 | 51360537  | 51360537  | C    | T | C | Y       | upstream   | KRT1      | NA       | NA                     |  |
| 13542 | 12 | 52636422  | 52636422  | C    | T | C | Y       | exonic     | HOXC12    | silent   | NM_173860:p.R218R      |  |
| 13542 | 12 | 52653556  | 52653556  | C    | G | C | S       | exonic     | HOXC11    | missense | NM_014212:p.S88R       |  |
| 13542 | 12 | 54507422  | 54507422  | G    | A | G | R       | exonic     | DNAJC14   | nonsense | NM_032364:p.R430X      |  |
| 13542 | 12 | 61682711  | 61682711  | A    | G | A | R       | intergenic | NA        | NA       | NA                     |  |
| 13542 | 12 | 62502194  | 62502194  | G    | T | G | K       | intergenic | NA        | NA       | NA                     |  |
| 13542 | 12 | 69024121  | 69024121  | T    | A | T | W       | ncRNA      | CNOT2     | NA       | NA                     |  |
| 13542 | 12 | 77117205  | 77117205  | T    | A | T | W       | intronic   | NAV3      | NA       | NA                     |  |
| 13542 | 12 | 77117206  | 77117206  | T    | A | T | W       | intronic   | NAV3      | NA       | NA                     |  |
| 13542 | 12 | 110340260 | 110340260 | C    | T | C | Y       | intronic   | SH2B3     | NA       | NA                     |  |
| 13542 | 12 | 112028117 | 112028117 | T    | A | T | W       | intronic   | RASAL1    | NA       | NA                     |  |
| 13542 | 12 | 119516328 | 119516328 | C    | T | C | Y       | intergenic | NA        | NA       | NA                     |  |
| 13542 | 12 | 125561130 | 125561130 | A    | T | A | W       | intergenic | NA        | NA       | NA                     |  |
| 13542 | 12 | 126368183 | 126368183 | A    | G | A | R       | intergenic | NA        | NA       | NA                     |  |
| 13542 | 12 | 128066002 | 128066002 | G    | A | G | R       | intergenic | NA        | NA       | NA                     |  |
| 13542 | 12 | 130050768 | 130050768 | A    | T | A | W       | intronic   | GPR133    | NA       | NA                     |  |
| 13542 | 12 | 131074294 | 131074294 | A    | T | A | W       | exonic     | EP400     | silent   | NM_015409:p.I1569I     |  |
| 13542 | 12 | 131860882 | 131860882 | A    | T | A | W       | exonic     | GOLGA3    | missense | NM_005895:p.L1414Q     |  |
| 13542 | 13 | 18699345  | 18699345  | A    | G | A | R       | intergenic | NA        | NA       | NA                     |  |
| 13542 | 13 | 46307669  | 46307669  | A    | T | A | W       | exonic     | HTR2A     | missense | NM_000621:p.F240L      |  |
| 13542 | 13 | 51418502  | 51418502  | C    | T | C | Y       | exonic     | ATP7B     | silent   | NM_000053:p.T993T      |  |
| 13542 | 14 | 18187106  | 18187106  | C    | G | C | S       | intergenic | NA        | NA       | NA                     |  |
| 13542 | 14 | 18447759  | 18447759  | G    | T | G | K       | exonic     | OR11H12   | missense | NM_001013354:p.G56W    |  |
| 13542 | 14 | 18633560  | 18633560  | A    | C | A | M       | ncRNA      | POTEG     | NA       | NA                     |  |
| 13542 | 14 | 22513915  | 22513915  | G    | A | G | R       | exonic     | JUB       | silent   | NM_032876:p.A465A      |  |
| 13542 | 14 | 52024963  | 52024963  | A    | G | A | R       | intronic   | TXNDC16   | NA       | NA                     |  |
| 13542 | 14 | 57770810  | 57770810  | C    | G | C | S       | intronic   | ACTR10    | NA       | NA                     |  |
| 13542 | 14 | 59133066  | 59133066  | G    | T | G | K       | UTR3       | RTN1      | NA       | NA                     |  |
| 13542 | 14 | 69995155  | 69995155  | A    | T | A | W       | exonic     | ADAM21    | missense | NM_003813:p.N396Y      |  |
| 13542 | 14 | 71270204  | 71270204  | C    | T | C | Y       | exonic     | SIPA1L1   | missense | NM_015556:p.P1665S     |  |
| 13542 | 14 | 85158674  | 85158674  | A    | G | A | R       | exonic     | FLRT2     | missense | NM_013231:p.M355V      |  |
| 13542 | 15 | 18741974  | 18741974  | C    | G | C | S       | intergenic | NA        | NA       | NA                     |  |
| 13542 | 15 | 20513937  | 20513937  | A    | T | A | W       | exonic     | CYFIP1    | missense | NM_001033028:p.H308L   |  |
| 13542 | 15 | 28724233  | 28724233  | G    | T | G | K       | intergenic | NA        | NA       | NA                     |  |
| 13542 | 15 | 65680005  | 65680005  | C    | T | C | Y       | intronic   | MAP2K5    | NA       | NA                     |  |
| 13542 | 15 | 75258263  | 75258263  | C    | G | C | S       | exonic     | PEAK1     | missense | NM_024776:p.E1021Q     |  |
| 13542 | 15 | 86952259  | 86952259  | T    | G | T | K       | upstream   | MIR1179   | NA       | NA                     |  |
| 13542 | 15 | 100061582 | 100061582 | T    | C | T | Y       | intronic   | TARSL2    | NA       | NA                     |  |
| 13542 | 16 | 28095994  | 28095994  | G    | C | G | S       | intronic   | XPO6      | NA       | NA                     |  |
| 13542 | 16 | 33845035  | 33845035  | T    | A | T | W       | intergenic | NA        | NA       | NA                     |  |
| 13542 | 16 | 34569808  | 34569808  | C    | A | C | M       | ncRNA      | LOC146481 | NA       | NA                     |  |
| 13542 | 16 | 55424887  | 55424887  | A    | G | A | R       | intronic   | NUP93     | NA       | NA                     |  |



|       |    |           |           |   |   |   |      |            |            |          |                      |
|-------|----|-----------|-----------|---|---|---|------|------------|------------|----------|----------------------|
| 13542 | 16 | 57174180  | 57174180  | A | G | A | R    | intronic   | CNOT1      | NA       | NA                   |
| 13542 | 16 | 66423859  | 66423859  | C | A | C | M    | splicing   | CENPT      | missense | NM_025082:p.R67S     |
| 13542 | 16 | 76641062  | 76641062  | C | A | C | M    | intergenic | NA         | NA       | NA                   |
| 13542 | 17 | 7519194   | 7519194   | C | - | G | *-/C | exonic     | TP53       | FS_del   | NM_001126117:p.G22fs |
| 13542 | 17 | 13920935  | 13920935  | G | A | G | R    | exonic     | COX10      | silent   | NM_001303:p.K112K    |
| 13542 | 17 | 21266740  | 21266740  | T | C | T | Y    | intergenic | NA         | NA       | NA                   |
| 13542 | 17 | 30758255  | 30758255  | G | A | G | R    | intergenic | NA         | NA       | NA                   |
| 13542 | 17 | 36833559  | 36833559  | C | A | C | M    | exonic     | KRT37      | missense | NM_003770:p.A186S    |
| 13542 | 17 | 55898480  | 55898480  | T | C | T | Y    | exonic     | APPBP2     | missense | NM_006380:p.Y209C    |
| 13542 | 17 | 59121295  | 59121295  | A | T | A | W    | intronic   | MAP3K3     | NA       | NA                   |
| 13542 | 18 | 97508     | 97508     | C | T | C | Y    | intergenic | NA         | NA       | NA                   |
| 13542 | 18 | 99645     | 99645     | G | A | G | R    | ncRNA      | ROCK1P1    | NA       | NA                   |
| 13542 | 18 | 32578233  | 32578233  | G | C | G | S    | intronic   | FHOD3      | NA       | NA                   |
| 13542 | 18 | 41785081  | 41785081  | G | C | G | S    | exonic     | KIAA1632   | silent   | NM_020964:p.L458L    |
| 13542 | 19 | 15654390  | 15654390  | G | A | G | R    | intronic   | CYP4F12    | NA       | NA                   |
| 13542 | 19 | 16067171  | 16067171  | G | T | G | K    | intronic   | TPM4       | NA       | NA                   |
| 13542 | 19 | 17394273  | 17394273  | G | T | G | K    | intronic   | FAM125A    | NA       | NA                   |
| 13542 | 19 | 22288835  | 22288835  | C | G | C | S    | intergenic | NA         | NA       | NA                   |
| 13542 | 19 | 42084687  | 42084687  | C | T | C | Y    | intronic   | ZNF829     | NA       | NA                   |
| 13542 | 19 | 49314171  | 49314171  | G | T | G | K    | intronic   | ZNF225     | NA       | NA                   |
| 13542 | 19 | 51804105  | 51804105  | G | - | T | *-/G | intronic   | CALM3      | NA       | NA                   |
| 13542 | 19 | 56611294  | 56611294  | G | - | A | *-/G | ncRNA      | LOC1001290 | NA       | NA                   |
| 13542 | 19 | 56700208  | 56700208  | A | T | A | W    | intergenic | NA         | NA       | NA                   |
| 13542 | 19 | 57738486  | 57738486  | A | G | A | R    | intronic   | ZNF808     | NA       | NA                   |
| 13542 | 19 | 57961135  | 57961135  | G | A | G | R    | exonic     | ZNF600     | silent   | NM_198457:p.T562T    |
| 13542 | 19 | 58893581  | 58893581  | A | G | A | R    | downstream | MIR523     | NA       | NA                   |
| 13542 | 19 | 59494810  | 59494810  | A | T | A | W    | intronic   | LILRA3     | NA       | NA                   |
| 13542 | 19 | 61158203  | 61158203  | A | C | A | M    | exonic     | NLRP8      | missense | NM_176811:p.T323P    |
| 13542 | 20 | 2525827   | 2525827   | C | T | C | Y    | exonic     | TMC2       | silent   | NM_080751:p.G369G    |
| 13542 | 20 | 3608177   | 3608177   | C | A | C | M    | exonic     | ADAM33     | missense | NM_153202:p.D47Y     |
| 13542 | 20 | 10278018  | 10278018  | G | C | G | S    | intergenic | NA         | NA       | NA                   |
| 13542 | 20 | 18418558  | 18418558  | G | A | G | R    | exonic     | RBBP9      | silent   | NM_006606:p.D137D    |
| 13542 | 20 | 21671404  | 21671404  | G | T | G | K    | intergenic | NA         | NA       | NA                   |
| 13542 | 20 | 29535660  | 29535660  | C | T | C | Y    | exonic     | REM1       | silent   | NM_014012:p.F221F    |
| 13542 | 20 | 30125006  | 30125006  | C | T | C | Y    | intronic   | HCK        | NA       | NA                   |
| 13542 | 20 | 33992405  | 33992405  | C | G | C | S    | intronic   | PHF20      | NA       | NA                   |
| 13542 | 20 | 47269347  | 47269347  | C | T | C | Y    | exonic     | DDX27      | silent   | NM_017895:p.A16A     |
| 13542 | 20 | 47956423  | 47956423  | T | A | T | W    | exonic     | SPATA2     | missense | NM_001135773:p.S235C |
| 13542 | 20 | 54461188  | 54461188  | C | T | C | Y    | exonic     | CASS4      | missense | NM_001164116:p.R517W |
| 13542 | 20 | 54461189  | 54461189  | G | T | G | K    | exonic     | CASS4      | missense | NM_001164116:p.R517L |
| 13542 | 20 | 61452493  | 61452493  | G | A | G | R    | exonic     | CHRNA4     | silent   | NM_000744:p.V238V    |
| 13542 | 21 | 9993135   | 9993135   | G | T | G | K    | intronic   | TPTE       | NA       | NA                   |
| 13542 | 21 | 10133316  | 10133316  | C | A | C | M    | intergenic | NA         | NA       | NA                   |
| 13542 | 21 | 14239181  | 14239181  | A | C | A | M    | ncRNA      | C21orf81   | NA       | NA                   |
| 13542 | 21 | 20719625  | 20719625  | G | T | G | K    | intergenic | NA         | NA       | NA                   |
| 13542 | 21 | 27228593  | 27228593  | C | A | C | M    | intronic   | ADAMT5S    | NA       | NA                   |
| 13542 | 21 | 46528278  | 46528278  | C | A | C | M    | intronic   | MCM3AP     | NA       | NA                   |
| 13542 | 22 | 31171542  | 31171542  | A | C | A | M    | intronic   | BPIL2      | NA       | NA                   |
| 13542 | 22 | 31171549  | 31171549  | A | G | A | R    | intronic   | BPIL2      | NA       | NA                   |
| 13542 | 22 | 35290384  | 35290384  | A | T | A | W    | exonic     | CACNG2     | missense | NM_006078:p.L311H    |
| 13542 | X  | 5832053   | 5832053   | C | A | C | M    | intronic   | NLGN4X     | NA       | NA                   |
| 13542 | X  | 11592456  | 11592456  | G | A | G | R    | exonic     | ARHGAP6    | silent   | NM_006125:p.D138D    |
| 13542 | X  | 21796472  | 21796472  | G | T | G | K    | intronic   | MBTPS2     | NA       | NA                   |
| 13542 | X  | 26088681  | 26088681  | C | T | C | Y    | intergenic | NA         | NA       | NA                   |
| 13542 | X  | 27740794  | 27740794  | G | T | G | K    | intronic   | MAGEB10    | NA       | NA                   |
| 13542 | X  | 30783002  | 30783002  | T | C | T | Y    | exonic     | TAB3       | missense | NM_152787:p.Q234R    |
| 13542 | X  | 34060103  | 34060103  | G | A | G | R    | exonic     | FAM47A     | missense | NM_203408:p.R72C     |
| 13542 | X  | 37798346  | 37798346  | A | G | A | R    | intronic   | SYTL5      | NA       | NA                   |
| 13542 | X  | 44814551  | 44814551  | G | T | G | K    | intronic   | KDM6A      | NA       | NA                   |
| 13542 | X  | 46926052  | 46926052  | A | T | A | W    | intronic   | RBM10      | NA       | NA                   |
| 13542 | X  | 48820011  | 48820011  | G | T | G | K    | exonic     | WDR45      | silent   | NM_007075:p.V262V    |
| 13542 | X  | 48962904  | 48962904  | C | G | C | S    | intronic   | CACNA1F    | NA       | NA                   |
| 13542 | X  | 64055758  | 64055758  | G | T | G | K    | exonic     | ZC4H2      | silent   | NM_001178032:p.P127P |
| 13542 | X  | 65158919  | 65158919  | C | T | C | Y    | exonic     | VSIG4      | missense | NM_001100431:p.A277T |
| 13542 | X  | 69419009  | 69419009  | G | T | G | K    | intronic   | RAB41      | NA       | NA                   |
| 13542 | X  | 70306276  | 70306276  | C | T | C | Y    | exonic     | NLGN3      | silent   | NM_181303:p.S717S    |
| 13542 | X  | 71789163  | 71789163  | T | A | T | W    | exonic     | PHKA1      | missense | NM_001172436:p.M401L |
| 13542 | X  | 74211877  | 74211877  | - | A | T | */+A | intronic   | ABCB7      | NA       | NA                   |
| 13542 | X  | 83288631  | 83288631  | A | C | A | M    | intronic   | RPS6KA6    | NA       | NA                   |
| 13542 | X  | 83611031  | 83611031  | C | T | C | Y    | exonic     | HDX        | missense | NM_001177478:p.R61K  |
| 13542 | X  | 85227747  | 85227747  | A | G | A | R    | intergenic | NA         | NA       | NA                   |
| 13542 | X  | 85302956  | 85302956  | C | T | C | Y    | intronic   | DACH2      | NA       | NA                   |
| 13542 | X  | 91020927  | 91020927  | C | A | C | M    | splicing   | PCDH11X    | missense | NM_032969:p.P1011Q   |
| 13542 | X  | 99438474  | 99438474  | G | T | G | K    | exonic     | PCDH19     | missense | NM_001105243:p.D921E |
| 13542 | X  | 100542319 | 100542319 | G | T | G | K    | exonic     | GLA        | silent   | NM_000169:p.P210P    |
| 13542 | X  | 100798225 | 100798225 | G | T | G | K    | exonic     | ARMCX2     | missense | NM_177949:p.P336T    |
| 13542 | X  | 101859016 | 101859016 | C | A | C | M    | UTR3       | ARMCX5-GPI | NA       | NA                   |
| 13542 | X  | 108698478 | 108698478 | C | A | C | M    | intergenic | NA         | NA       | NA                   |
| 13542 | X  | 108698479 | 108698479 | C | T | C | Y    | intergenic | NA         | NA       | NA                   |

|       |   |           |           |   |   |   |      |            |          |          |                      |
|-------|---|-----------|-----------|---|---|---|------|------------|----------|----------|----------------------|
| 13542 | X | 135233058 | 135233058 | C | A | C | M    | exonic     | GPR112   | missense | NM_153834:p.R176S    |
| 13542 | X | 147867528 | 147867528 | G | A | G | R    | intronic   | AFF2     | NA       | NA                   |
| 13542 | X | 148538885 | 148538885 | G | A | G | R    | intergenic | NA       | NA       | NA                   |
| 13542 | X | 151686436 | 151686436 | C | T | C | Y    | exonic     | MAGEA3   | silent   | NM_005362:p.P129P    |
| 13542 | X | 153247933 | 153247933 | G | T | G | K    | exonic     | FLNA     | missense | NM_001456:p.P389T    |
| 13542 | X | 153534045 | 153534045 | G | A | G | R    | exonic     | CTAG2    | silent   | NM_020994:p.I108I    |
| 13542 | Y | 11753062  | 11753062  | A | T | A | W    | intergenic | NA       | NA       | NA                   |
| 13542 | Y | 11772088  | 11772088  | G | A | G | R    | intergenic | NA       | NA       | NA                   |
| 13542 | Y | 11774294  | 11774294  | G | A | G | R    | intergenic | NA       | NA       | NA                   |
| 13542 | M | 2037      | 2037      | T | C | T | Y    | intergenic | NA       | NA       | NA                   |
| 13681 | 1 | 1887792   | 1887792   | G | T | G | K    | exonic     | KIAA1751 | silent   | NM_001080484:p.R427R |
| 13681 | 1 | 16847565  | 16847565  | A | G | A | R    | ncRNA      | MST1P2   | NA       | NA                   |
| 13681 | 1 | 22032419  | 22032419  | G | A | G | R    | exonic     | HSPG2    | missense | NM_005529:p.P3675L   |
| 13681 | 1 | 37107881  | 37107881  | C | G | C | S    | intronic   | GRIK3    | NA       | NA                   |
| 13681 | 1 | 50084461  | 50084461  | C | A | C | M    | intronic   | AGBL4    | NA       | NA                   |
| 13681 | 1 | 62485813  | 62485813  | C | A | C | M    | exonic     | KANK4    | missense | NM_181712:p.M934I    |
| 13681 | 1 | 74945346  | 74945346  | A | T | A | W    | intronic   | CRYZ     | NA       | NA                   |
| 13681 | 1 | 78988690  | 78988690  | G | T | G | K    | intergenic | NA       | NA       | NA                   |
| 13681 | 1 | 86149611  | 86149611  | G | A | G | R    | intronic   | COL24A1  | NA       | NA                   |
| 13681 | 1 | 94725843  | 94725843  | G | T | G | K    | exonic     | ABCD3    | missense | NM_002858:p.A325S    |
| 13681 | 1 | 100700908 | 100700908 | G | A | G | R    | exonic     | CDC14A   | missense | NM_033312:p.G241S    |
| 13681 | 1 | 100700909 | 100700909 | G | T | G | K    | exonic     | CDC14A   | missense | NM_033312:p.G241V    |
| 13681 | 1 | 108095313 | 108095313 | C | A | C | M    | exonic     | VAV3     | missense | NM_006113:p.G403V    |
| 13681 | 1 | 144312975 | 144312975 | - | T | C | */+T | exonic     | POLR3C   | FS_ins   | NM_006468:p.S263fs   |
| 13681 | 1 | 154372508 | 154372508 | C | T | C | Y    | exonic     | LMNA     | missense | NM_170708:p.R377C    |
| 13681 | 1 | 156783703 | 156783703 | A | T | A | W    | exonic     | OR6Y1    | missense | NM_001005189:p.Y273N |
| 13681 | 1 | 156914274 | 156914274 | C | G | C | S    | intronic   | SPTA1    | NA       | NA                   |
| 13681 | 1 | 156914286 | 156914286 | G | T | G | K    | intronic   | SPTA1    | NA       | NA                   |
| 13681 | 1 | 157429831 | 157429831 | T | A | T | W    | intronic   | CADM3    | NA       | NA                   |
| 13681 | 1 | 174792355 | 174792355 | A | T | A | W    | exonic     | PAPPA2   | missense | NM_021936:p.T92S     |
| 13681 | 1 | 177344821 | 177344821 | C | G | C | S    | exonic     | ABL2     | missense | NM_001168236:p.G714A |
| 13681 | 1 | 177823283 | 177823283 | C | A | C | M    | intergenic | NA       | NA       | NA                   |
| 13681 | 1 | 184301102 | 184301102 | G | T | G | K    | exonic     | HMCN1    | missense | NM_031935:p.Q2541H   |
| 13681 | 1 | 185191774 | 185191774 | C | T | C | Y    | intronic   | PLA2G4A  | NA       | NA                   |
| 13681 | 1 | 189382660 | 189382660 | C | A | C | M    | intergenic | NA       | NA       | NA                   |
| 13681 | 1 | 194551698 | 194551698 | C | A | C | M    | exonic     | KCNT2    | missense | NM_198503:p.E810D    |
| 13681 | 1 | 199224010 | 199224010 | C | A | C | M    | intronic   | KIF21B   | NA       | NA                   |
| 13681 | 1 | 200836115 | 200836115 | G | T | G | K    | exonic     | SYT2     | silent   | NM_177402:p.G304G    |
| 13681 | 1 | 213111392 | 213111392 | T | A | T | W    | intergenic | NA       | NA       | NA                   |
| 13681 | 1 | 246058343 | 246058343 | C | A | C | M    | intergenic | NA       | NA       | NA                   |
| 13681 | 2 | 27159759  | 27159759  | C | T | C | Y    | exonic     | EMILIN1  | silent   | NM_007046:p.L606L    |
| 13681 | 2 | 27656470  | 27656470  | C | A | C | M    | exonic     | C2orf16  | missense | NM_032266:p.S1176Y   |
| 13681 | 2 | 48540677  | 48540677  | A | T | A | W    | ncRNA      | KLRAQ1   | NA       | NA                   |
| 13681 | 2 | 55444590  | 55444590  | C | T | C | Y    | splicing   | CCDC88A  | silent   | NM_018084:p.E162E    |
| 13681 | 2 | 102379637 | 102379637 | C | A | C | M    | exonic     | IL18R1   | missense | NM_003855:p.H495Q    |
| 13681 | 2 | 102407169 | 102407169 | A | T | A | W    | exonic     | IL18RAP  | nonsense | NM_003853:p.K148X    |
| 13681 | 2 | 139024865 | 139024865 | C | T | C | Y    | intronic   | SPOPL    | NA       | NA                   |
| 13681 | 2 | 141176267 | 141176267 | C | T | C | Y    | exonic     | LRP1B    | missense | NM_018557:p.G2072E   |
| 13681 | 2 | 141662516 | 141662516 | G | C | G | S    | exonic     | LRP1B    | silent   | NM_018557:p.T319T    |
| 13681 | 2 | 161843855 | 161843855 | C | G | C | S    | intergenic | NA       | NA       | NA                   |
| 13681 | 2 | 168279328 | 168279328 | A | T | A | W    | intergenic | NA       | NA       | NA                   |
| 13681 | 2 | 175666229 | 175666229 | G | A | G | R    | exonic     | ATF2     | missense | NM_001880:p.H331Y    |
| 13681 | 2 | 178570559 | 178570559 | G | C | G | S    | intronic   | PDE11A   | NA       | NA                   |
| 13681 | 2 | 183644985 | 183644985 | A | T | A | W    | intergenic | NA       | NA       | NA                   |
| 13681 | 2 | 187925065 | 187925065 | T | A | T | W    | intronic   | CALCRL   | NA       | NA                   |
| 13681 | 2 | 201142770 | 201142770 | G | A | G | R    | exonic     | SGOL2    | missense | NM_001160046:p.E205K |
| 13681 | 2 | 230453013 | 230453013 | T | A | T | W    | exonic     | TRIP12   | silent   | NM_004238:p.P9P      |
| 13681 | 3 | 4998105   | 4998105   | T | C | T | Y    | exonic     | BHLHE40  | missense | NM_003670:p.V96A     |
| 13681 | 3 | 5232630   | 5232630   | A | - | G | */-A | UTR3       | EDEM1    | NA       | NA                   |
| 13681 | 3 | 5232632   | 5232632   | C | T | C | Y    | UTR3       | EDEM1    | NA       | NA                   |
| 13681 | 3 | 22398928  | 22398928  | T | A | T | W    | intergenic | NA       | NA       | NA                   |
| 13681 | 3 | 34889818  | 34889818  | C | G | C | S    | intergenic | NA       | NA       | NA                   |
| 13681 | 3 | 40499188  | 40499188  | G | T | G | K    | exonic     | ZNF619   | missense | NM_001145093:p.G95V  |
| 13681 | 3 | 77230036  | 77230036  | C | T | C | Y    | exonic     | ROBO2    | nonsense | NM_001128929:p.Q62X  |
| 13681 | 3 | 101758378 | 101758378 | G | T | G | K    | exonic     | TMEM45A  | missense | NM_018004:p.G92V     |
| 13681 | 3 | 123008843 | 123008843 | A | T | A | W    | intronic   | IQCB1    | NA       | NA                   |
| 13681 | 3 | 184406312 | 184406312 | G | A | G | R    | intronic   | MCF2L2   | NA       | NA                   |
| 13681 | 3 | 197278751 | 197278751 | T | A | T | W    | intronic   | TFRC     | NA       | NA                   |
| 13681 | 3 | 197699849 | 197699849 | A | C | A | M    | intronic   | RNF168   | NA       | NA                   |
| 13681 | 4 | 37528338  | 37528338  | C | A | C | M    | exonic     | PGM2     | silent   | NM_018290:p.A517A    |
| 13681 | 4 | 42169195  | 42169195  | G | A | G | R    | ncRNA      | MIR548M  | NA       | NA                   |
| 13681 | 4 | 57491293  | 57491293  | G | T | G | K    | exonic     | REST     | silent   | NM_005612:p.V504V    |
| 13681 | 4 | 113398347 | 113398347 | G | A | G | R    | intronic   | AP1AR    | NA       | NA                   |
| 13681 | 4 | 113398348 | 113398348 | T | A | T | W    | intronic   | AP1AR    | NA       | NA                   |
| 13681 | 4 | 113655239 | 113655239 | C | G | C | S    | UTR3       | NEUROG2  | NA       | NA                   |
| 13681 | 4 | 134303714 | 134303714 | G | T | G | K    | exonic     | PCDH10   | missense | NM_032961:p.G977V    |
| 13681 | 5 | 466429    | 466429    | T | A | T | W    | intronic   | AHRR     | NA       | NA                   |
| 13681 | 5 | 23545478  | 23545478  | C | A | C | M    | intronic   | PRDM9    | NA       | NA                   |
| 13681 | 5 | 29918059  | 29918059  | G | T | G | K    | intergenic | NA       | NA       | NA                   |

|       |    |           |           |   |   |   |      |            |          |          |                       |
|-------|----|-----------|-----------|---|---|---|------|------------|----------|----------|-----------------------|
| 13681 | 5  | 62108508  | 62108508  | A | C | A | M    | intergenic | NA       | NA       | NA                    |
| 13681 | 5  | 70841029  | 70841029  | C | G | C | S    | intronic   | BDP1     | NA       | NA                    |
| 13681 | 5  | 71792845  | 71792845  | G | T | G | K    | exonic     | ZNF366   | silent   | NM_152625:p.R79R      |
| 13681 | 5  | 75410645  | 75410645  | T | A | T | W    | intergenic | NA       | NA       | NA                    |
| 13681 | 5  | 82308512  | 82308512  | T | A | T | W    | intergenic | NA       | NA       | NA                    |
| 13681 | 5  | 97940704  | 97940704  | G | T | G | K    | intergenic | NA       | NA       | NA                    |
| 13681 | 5  | 158182846 | 158182846 | T | C | T | Y    | exonic     | EBF1     | missense | NM_024007:p.M232V     |
| 13681 | 5  | 168953178 | 168953178 | G | C | G | S    | intronic   | CCDC99   | NA       | NA                    |
| 13681 | 6  | 3683268   | 3683268   | C | G | C | S    | intronic   | C6orf145 | NA       | NA                    |
| 13681 | 6  | 25797358  | 25797358  | T | A | T | W    | intronic   | SCGN     | NA       | NA                    |
| 13681 | 6  | 29751688  | 29751688  | C | A | C | M    | splicing   | ZFP57    | NA       | NA                    |
| 13681 | 6  | 32665427  | 32665427  | G | A | G | R    | exonic     | HLA-DRB1 | missense | NM_002124:p.S24F      |
| 13681 | 6  | 32717348  | 32717348  | G | T | G | T    | intronic   | HLA-DQA1 | NA       | NA                    |
| 13681 | 6  | 34167948  | 34167948  | C | A | C | M    | intronic   | GRM4     | NA       | NA                    |
| 13681 | 7  | 14197993  | 14197993  | G | T | G | K    | intronic   | DGKB     | NA       | NA                    |
| 13681 | 7  | 57088412  | 57088412  | G | T | G | K    | intergenic | NA       | NA       | NA                    |
| 13681 | 7  | 91936036  | 91936036  | G | T | G | K    | intergenic | NA       | NA       | NA                    |
| 13681 | 7  | 93876730  | 93876730  | A | T | A | W    | intronic   | COL1A2   | NA       | NA                    |
| 13681 | 7  | 93881123  | 93881123  | T | C | T | Y    | intronic   | COL1A2   | NA       | NA                    |
| 13681 | 7  | 129306680 | 129306680 | G | A | G | R    | exonic     | UBE2H    | missense | NM_003344:p.I57L      |
| 13681 | 7  | 142150825 | 142150825 | C | A | C | M    | intergenic | NA       | NA       | NA                    |
| 13681 | 8  | 30005806  | 30005806  | A | T | A | W    | intergenic | NA       | NA       | NA                    |
| 13681 | 8  | 63939447  | 63939447  | G | A | G | R    | intronic   | NKAIN3   | NA       | NA                    |
| 13681 | 8  | 139797045 | 139797045 | T | C | T | Y    | intronic   | COL22A1  | NA       | NA                    |
| 13681 | 8  | 143993521 | 143993521 | C | T | C | Y    | exonic     | CYP11B2  | missense | NM_000498:p.A180T     |
| 13681 | 9  | 6244550   | 6244550   | G | A | G | R    | exonic     | IL33     | silent   | NM_001199640:p.V161V  |
| 13681 | 9  | 76560014  | 76560014  | C | A | C | M    | intronic   | TRPM6    | NA       | NA                    |
| 13681 | 9  | 79175162  | 79175162  | G | T | G | K    | exonic     | VPS13A   | missense | NM_015186:p.G2919C    |
| 13681 | 9  | 89936175  | 89936175  | C | - | T | */-C | exonic     | FAM75C2  | FS_del   | NM_001166137:p.E533fs |
| 13681 | 9  | 94689870  | 94689870  | A | C | A | M    | intergenic | NA       | NA       | NA                    |
| 13681 | 9  | 129525322 | 129525322 | C | G | C | S    | exonic     | TTC16    | missense | NM_144965:p.A254G     |
| 13681 | 10 | 5187856   | 5187856   | C | T | C | Y    | ncRNA      | AKR1CL1  | NA       | NA                    |
| 13681 | 10 | 35859182  | 35859182  | G | C | G | S    | intronic   | CCNY     | NA       | NA                    |
| 13681 | 10 | 36026495  | 36026495  | G | T | G | K    | intergenic | NA       | NA       | NA                    |
| 13681 | 10 | 37458931  | 37458931  | C | A | C | M    | exonic     | ANKRD30A | missense | NM_052997:p.P53H      |
| 13681 | 10 | 93758872  | 93758872  | G | T | G | K    | exonic     | BTAf1    | nonsense | NM_003972:p.E1344X    |
| 13681 | 10 | 118297803 | 118297803 | C | G | C | S    | intronic   | PNLIP    | NA       | NA                    |
| 13681 | 10 | 125511458 | 125511458 | C | T | C | Y    | exonic     | CPXM2    | missense | NM_198148:p.R566Q     |
| 13681 | 10 | 135304949 | 135304949 | T | G | T | K    | intergenic | NA       | NA       | NA                    |
| 13681 | 10 | 135305774 | 135305774 | G | T | G | K    | intergenic | NA       | NA       | NA                    |
| 13681 | 11 | 5819164   | 5819164   | G | T | G | K    | exonic     | OR52E6   | nonsense | NM_001005167:p.Y180X  |
| 13681 | 11 | 5972911   | 5972911   | C | T | C | Y    | intergenic | NA       | NA       | NA                    |
| 13681 | 11 | 14949267  | 14949267  | G | T | G | K    | exonic     | CALCA    | silent   | NM_001033952:p.V16V   |
| 13681 | 11 | 17030390  | 17030390  | C | G | C | S    | intergenic | NA       | NA       | NA                    |
| 13681 | 11 | 18692711  | 18692711  | A | C | A | M    | exonic     | IGSF22   | missense | NM_173588:p.V523G     |
| 13681 | 11 | 21207543  | 21207543  | C | A | C | M    | exonic     | NEEL1    | missense | NM_201551:p.P506T     |
| 13681 | 11 | 39139781  | 39139781  | G | T | G | K    | intergenic | NA       | NA       | NA                    |
| 13681 | 11 | 55162725  | 55162725  | G | A | G | R    | exonic     | OR4P4    | missense | NM_001004124:p.G106R  |
| 13681 | 11 | 55412351  | 55412351  | T | A | T | W    | intronic   | SPRYD5   | NA       | NA                    |
| 13681 | 11 | 58811781  | 58811781  | C | T | C | Y    | intergenic | NA       | NA       | NA                    |
| 13681 | 11 | 67881869  | 67881869  | G | T | G | K    | exonic     | LRP5     | missense | NM_002335:p.A222S     |
| 13681 | 11 | 85074415  | 85074415  | A | G | A | R    | exonic     | CCDC89   | missense | NM_152723:p.M136T     |
| 13681 | 11 | 89578264  | 89578264  | A | G | A | R    | intronic   | CHORDC1  | NA       | NA                    |
| 13681 | 11 | 93126675  | 93126675  | T | G | T | K    | intronic   | C11orf54 | NA       | NA                    |
| 13681 | 11 | 101704819 | 101704819 | A | T | A | W    | intronic   | BIRC3    | NA       | NA                    |
| 13681 | 11 | 118530874 | 118530874 | C | T | C | Y    | intronic   | ABCG4    | NA       | NA                    |
| 13681 | 11 | 129496702 | 129496702 | C | T | C | Y    | ncRNA      | APLP2    | NA       | NA                    |
| 13681 | 12 | 4614926   | 4614926   | C | G | C | S    | intronic   | AKAP3    | NA       | NA                    |
| 13681 | 12 | 6749863   | 6749863   | G | T | G | K    | exonic     | PTMS     | silent   | NM_002824:p.S101S     |
| 13681 | 12 | 8091887   | 8091887   | G | C | G | S    | exonic     | FOXJ2    | missense | NM_018416:p.Q320H     |
| 13681 | 12 | 20889389  | 20889389  | C | T | C | Y    | intronic   | SLCO1B3  | NA       | NA                    |
| 13681 | 12 | 25289552  | 25289552  | C | A | C | M    | exonic     | KRAS     | missense | NM_033360:p.G12C      |
| 13681 | 12 | 45915107  | 45915107  | G | T | G | K    | UTR5       | FAM113B  | NA       | NA                    |
| 13681 | 12 | 51452881  | 51452881  | C | A | C | M    | exonic     | KRT76    | missense | NM_015848:p.D309Y     |
| 13681 | 12 | 77106175  | 77106175  | C | T | C | Y    | exonic     | NAV3     | missense | NM_014903:p.A1914V    |
| 13681 | 12 | 95661350  | 95661350  | T | A | T | W    | intergenic | NA       | NA       | NA                    |
| 13681 | 12 | 108159425 | 108159425 | A | T | A | W    | exonic     | ACACB    | missense | NM_001093:p.N1507Y    |
| 13681 | 12 | 109833383 | 109833383 | G | T | G | K    | intronic   | MYL2     | NA       | NA                    |
| 13681 | 12 | 109835413 | 109835413 | C | T | C | Y    | intronic   | MYL2     | NA       | NA                    |
| 13681 | 12 | 122253724 | 122253724 | A | T | A | W    | intronic   | MPHOSPH9 | NA       | NA                    |
| 13681 | 13 | 33298027  | 33298027  | G | T | G | K    | intronic   | RFC3     | NA       | NA                    |
| 13681 | 13 | 99751718  | 99751718  | G | T | G | K    | exonic     | PCCA     | nonsense | NM_000282:p.E357X     |
| 13681 | 14 | 19895162  | 19895162  | A | T | A | W    | intronic   | PARP2    | NA       | NA                    |
| 13681 | 14 | 34620217  | 34620217  | A | T | A | W    | UTR3       | FAM177A1 | NA       | NA                    |
| 13681 | 14 | 43080079  | 43080079  | C | G | C | S    | intergenic | NA       | NA       | NA                    |
| 13681 | 14 | 50448341  | 50448341  | T | C | T | Y    | splicing   | PYGL     | NA       | NA                    |
| 13681 | 15 | 18750459  | 18750459  | T | A | T | W    | intergenic | NA       | NA       | NA                    |
| 13681 | 15 | 21483383  | 21483383  | G | T | G | K    | exonic     | NDN      | missense | NM_002487:p.S25R      |
| 13681 | 15 | 25814880  | 25814880  | C | A | C | M    | intronic   | OCA2     | NA       | NA                    |

|       |    |           |           |   |   |   |      |            |           |             |                       |
|-------|----|-----------|-----------|---|---|---|------|------------|-----------|-------------|-----------------------|
| 13681 | 15 | 49617750  | 49617750  | G | A | G | R    | exonic     | DMXL2     | missense    | NM_001174117:p.H433Y  |
| 13681 | 15 | 61141631  | 61141631  | C | G | C | S    | intronic   | TPM1      | NA          | NA                    |
| 13681 | 15 | 70741812  | 70741812  | G | A | G | R    | exonic     | GOLGA6B   | missense    | NM_018652:p.R338K     |
| 13681 | 15 | 72352174  | 72352174  | G | T | G | K    | exonic     | CCDC33    | missense    | NM_025055:p.Q216H     |
| 13681 | 15 | 81717636  | 81717636  | G | T | G | K    | exonic     | BNC1      | silent      | NM_001717:p.P849P     |
| 13681 | 15 | 86273408  | 86273408  | C | G | C | S    | intronic   | NTRK3     | NA          | NA                    |
| 13681 | 16 | 79611184  | 79611184  | T | C | T | Y    | intronic   | CENPN     | NA          | NA                    |
| 13681 | 17 | 10307597  | 10307597  | C | A | C | M    | exonic     | MYH4      | missense    | NM_017533:p.R246L     |
| 13681 | 17 | 10340160  | 10340160  | G | T | G | K    | exonic     | MYH1      | missense    | NM_005963:p.S1667R    |
| 13681 | 17 | 11835248  | 11835248  | G | C | G | S    | intronic   | ZNF18     | NA          | NA                    |
| 13681 | 17 | 15584107  | 15584107  | A | C | A | M    | intronic   | TBC1D26   | NA          | NA                    |
| 13681 | 17 | 15614536  | 15614536  | C | G | C | S    | intergenic | NA        | NA          | NA                    |
| 13681 | 17 | 18906190  | 18906190  | A | G | A | R    | intergenic | NA        | NA          | NA                    |
| 13681 | 17 | 21259334  | 21259334  | C | T | C | Y    | exonic     | KCNJ12    | silent      | NM_001194958:p.N29N   |
| 13681 | 17 | 21259353  | 21259353  | G | T | G | K    | exonic     | KCNJ12    | missense    | NM_001194958:p.V36L   |
| 13681 | 17 | 32892886  | 32892886  | G | C | G | S    | intronic   | TADA2A    | NA          | NA                    |
| 13681 | 17 | 36559326  | 36559326  | T | A | T | W    | exonic     | KRTAP4-5  | missense    | NM_033188:p.S74C      |
| 13681 | 17 | 42922593  | 42922593  | T | C | T | Y    | ncRNA      | MRPL45P2  | NA          | NA                    |
| 13681 | 17 | 42922594  | 42922594  | C | A | C | M    | ncRNA      | MRPL45P2  | NA          | NA                    |
| 13681 | 17 | 55867547  | 55867547  | C | T | C | Y    | intergenic | NA        | NA          | NA                    |
| 13681 | 17 | 61070488  | 61070488  | G | T | G | K    | intronic   | CCDC46    | NA          | NA                    |
| 13681 | 17 | 64604500  | 64604500  | T | A | T | W    | exonic     | ABCA6     | missense    | NM_080284:p.Y1053F    |
| 13681 | 18 | 100890    | 100890    | G | T | G | K    | ncRNA      | ROCK1P1   | NA          | NA                    |
| 13681 | 18 | 11600624  | 11600624  | G | C | G | S    | intergenic | NA        | NA          | NA                    |
| 13681 | 18 | 11600630  | 11600630  | G | A | G | R    | intergenic | NA        | NA          | NA                    |
| 13681 | 18 | 16771423  | 16771423  | T | G | T | K    | intergenic | NA        | NA          | NA                    |
| 13681 | 18 | 16773165  | 16773165  | C | A | C | M    | intergenic | NA        | NA          | NA                    |
| 13681 | 18 | 27796787  | 27796787  | C | A | C | M    | intergenic | NA        | NA          | NA                    |
| 13681 | 18 | 71259694  | 71259694  | T | A | T | W    | intronic   | C18orf62  | NA          | NA                    |
| 13681 | 19 | 10463584  | 10463584  | C | A | C | M    | exonic     | KEAP1     | missense    | NM_012289:p.G332C     |
| 13681 | 19 | 10463585  | 10463585  | C | A | C | M    | exonic     | KEAP1     | silent      | NM_012289:p.A331A     |
| 13681 | 19 | 15995720  | 15995720  | G | A | G | R    | ncRNA      | LOC126536 | NA          | NA                    |
| 13681 | 19 | 19288233  | 19288233  | G | A | G | R    | exonic     | SUGP1     | silent      | NM_172231:p.G68G      |
| 13681 | 19 | 21947991  | 21947991  | T | C | T | Y    | exonic     | ZNF208    | missense    | NM_007153:p.Y562C     |
| 13681 | 19 | 41419571  | 41419571  | G | T | G | K    | exonic     | ZNF146    | missense    | NM_001099638:p.C130F  |
| 13681 | 19 | 42001238  | 42001238  | G | T | G | K    | exonic     | ZNF790    | silent      | NM_206894:p.S616S     |
| 13681 | 19 | 46222071  | 46222071  | A | T | A | W    | intergenic | NA        | NA          | NA                    |
| 13681 | 19 | 54785373  | 54785373  | G | T | G | K    | intronic   | PRRG2     | NA          | NA                    |
| 13681 | 19 | 56406810  | 56406810  | C | A | C | M    | intergenic | NA        | NA          | NA                    |
| 13681 | 19 | 60055510  | 60055510  | T | A | T | W    | exonic     | KIR3DL2   | missense    | NM_006737:p.W106R     |
| 13681 | 19 | 60363878  | 60363878  | G | T | G | K    | exonic     | C19orf51  | silent      | NM_178837:p.T377T     |
| 13681 | 19 | 62357638  | 62357638  | G | C | G | S    | exonic     | DUXA      | missense    | NM_001012729:p.T190S  |
| 13681 | 20 | 2553031   | 2553031   | C | A | C | M    | exonic     | TMC2      | silent      | NM_080751:p.I765I     |
| 13681 | 20 | 5845507   | 5845507   | C | A | C | M    | exonic     | CHGB      | silent      | NM_001819:p.A44A      |
| 13681 | 20 | 40060263  | 40060263  | G | A | G | R    | intergenic | NA        | NA          | NA                    |
| 13681 | 20 | 52219571  | 52219571  | A | G | A | R    | exonic     | CYP24A1   | silent      | NM_001128915:p.L203L  |
| 13681 | 21 | 22730583  | 22730583  | T | C | T | Y    | intergenic | NA        | NA          | NA                    |
| 13681 | 21 | 46641788  | 46641788  | G | T | G | K    | exonic     | PCNT      | missense    | NM_006031:p.Q1466H    |
| 13681 | 22 | 22890510  | 22890510  | A | T | A | W    | exonic     | CABIN1    | missense    | NM_001201429:p.Q1580L |
| 13681 | 22 | 30632482  | 30632482  | G | T | G | K    | exonic     | DEPDC5    | stoploss SN | NM_014662:p.X1573L    |
| 13681 | 22 | 41518393  | 41518393  | C | A | C | M    | intergenic | NA        | NA          | NA                    |
| 13681 | X  | 5821101   | 5821101   | C | G | C | S    | exonic     | NLGN4X    | missense    | NM_020742:p.Q736H     |
| 13681 | X  | 26067991  | 26067991  | A | T | A | W    | exonic     | MAGEB18   | missense    | NM_173699:p.H323L     |
| 13681 | X  | 47314316  | 47314316  | C | T | C | Y    | exonic     | ARAF      | silent      | NM_001654:p.Y500Y     |
| 13681 | X  | 47315314  | 47315314  | T | G | T | K    | exonic     | ARAF      | missense    | NM_001654:p.C549G     |
| 13681 | X  | 48001809  | 48001809  | G | C | G | S    | intronic   | SSX1      | NA          | NA                    |
| 13681 | X  | 54794338  | 54794338  | G | C | G | S    | exonic     | ITIH5L    | missense    | NM_198510:p.P1185A    |
| 13681 | X  | 54801382  | 54801382  | C | T | C | Y    | exonic     | ITIH5L    | missense    | NM_198510:p.S617N     |
| 13681 | X  | 63181462  | 63181462  | C | A | C | M    | intergenic | NA        | NA          | NA                    |
| 13681 | X  | 65169233  | 65169233  | G | T | G | K    | exonic     | VSIG4     | missense    | NM_001184830:p.Q166K  |
| 13681 | X  | 71812673  | 71812673  | A | - | C | */-A | exonic     | PHKA1     | nonsense    | NM_001172436:p.L197X  |
| 13681 | X  | 71812675  | 71812675  | C | T | C | Y    | exonic     | PHKA1     | silent      | NM_001172436:p.E196E  |
| 13681 | X  | 73878777  | 73878777  | C | A | C | M    | exonic     | KIAA2022  | missense    | NM_001008537:p.K780N  |
| 13681 | X  | 74921539  | 74921539  | C | A | C | M    | exonic     | MAGEE2    | nonsense    | NM_138703:p.E25X      |
| 13681 | X  | 76731920  | 76731920  | G | T | G | K    | intronic   | ATRX      | NA          | NA                    |
| 13681 | X  | 79714464  | 79714464  | C | G | C | S    | intergenic | NA        | NA          | NA                    |
| 13681 | X  | 84472575  | 84472575  | G | T | G | K    | intronic   | POF1B     | NA          | NA                    |
| 13681 | X  | 97049386  | 97049386  | G | T | G | K    | intergenic | NA        | NA          | NA                    |
| 13681 | X  | 99028524  | 99028524  | C | A | C | M    | ncRNA      | LOC442459 | NA          | NA                    |
| 13681 | X  | 100286887 | 100286887 | C | A | C | M    | intronic   | CENPI     | NA          | NA                    |
| 13681 | X  | 100982720 | 100982720 | C | A | C | M    | exonic     | NXF5      | missense    | NM_032946:p.R135L     |
| 13681 | X  | 108671313 | 108671313 | C | A | C | M    | intronic   | NXT2      | NA          | NA                    |
| 13681 | X  | 117698648 | 117698648 | T | C | T | Y    | exonic     | DOCK11    | missense    | NM_144658:p.I1879T    |
| 13681 | X  | 117844518 | 117844518 | G | T | G | K    | UTR3       | ZCCHC12   | NA          | NA                    |
| 13681 | X  | 120165464 | 120165464 | G | C | G | S    | intergenic | NA        | NA          | NA                    |
| 13681 | X  | 123857689 | 123857689 | C | A | C | M    | exonic     | ODZ1      | missense    | NM_001163279:p.Q100H  |
| 13681 | X  | 125126711 | 125126711 | C | A | C | M    | exonic     | DCAF12L2  | missense    | NM_001013628:p.S293I  |
| 13681 | X  | 126585173 | 126585173 | C | A | C | M    | intergenic | NA        | NA          | NA                    |
| 13681 | X  | 128546067 | 128546067 | T | A | T | W    | intronic   | OCRL      | NA          | NA                    |

|       |   |           |           |   |   |   |      |            |           |          |                       |
|-------|---|-----------|-----------|---|---|---|------|------------|-----------|----------|-----------------------|
| 13681 | X | 135281118 | 135281118 | C | A | C | M    | intronic   | GPR112    | NA       | NA                    |
| 13681 | X | 142545963 | 142545963 | - | T | G | */+T | exonic     | SLITRK4   | FS_ins   | NM_001184750:p.L210fs |
| 13681 | X | 142588110 | 142588110 | T | G | T | K    | intergenic | NA        | NA       | NA                    |
| 13681 | X | 147087436 | 147087436 | G | T | G | K    | intergenic | NA        | NA       | NA                    |
| 13681 | X | 149390076 | 149390076 | G | T | G | K    | exonic     | MAMLD1    | missense | NM_005491:p.G525W     |
| 13681 | X | 149558139 | 149558139 | G | T | G | K    | exonic     | MTM1      | silent   | NM_000252:p.V170V     |
| 13681 | X | 149663568 | 149663568 | - | T | G | */+T | exonic     | MTMR1     | FS_ins   | NM_003828:p.W509fs    |
| 13681 | X | 149663569 | 149663569 | C | A | C | M    | exonic     | MTMR1     | missense | NM_003828:p.Q510K     |
| 13681 | X | 151034077 | 151034077 | G | T | G | K    | UTR3       | MAGEA5    | NA       | NA                    |
| 13681 | X | 152590703 | 152590703 | C | A | C | M    | intronic   | PNCK      | NA       | NA                    |
| 13681 | X | 152610210 | 152610210 | C | A | C | M    | intronic   | SLC6A8    | NA       | NA                    |
| 13681 | X | 153534785 | 153534785 | C | G | C | S    | exonic     | CTAG2     | missense | NM_020994:p.G67R      |
| 13681 | X | 153597761 | 153597761 | C | A | C | M    | exonic     | GAB3      | missense | NM_080612:p.R37L      |
| 13681 | X | 153662948 | 153662948 | G | T | G | K    | intronic   | MPP1      | NA       | NA                    |
| 13681 | Y | 57411158  | 57411158  | T | A | T | W    | intergenic | NA        | NA       | NA                    |
| 15145 | 1 | 8606966   | 8606966   | T | A | T | W    | exonic     | RERE      | missense | NM_001042681:p.D129V  |
| 15145 | 1 | 33963731  | 33963731  | A | G | A | R    | intronic   | CSMD2     | NA       | NA                    |
| 15145 | 1 | 39157299  | 39157299  | G | A | G | R    | exonic     | RHBDL2    | missense | NM_017821:p.S58F      |
| 15145 | 1 | 57253525  | 57253525  | G | A | G | R    | exonic     | DAB1      | missense | NM_021080:p.P355S     |
| 15145 | 1 | 66878165  | 66878165  | G | T | G | K    | intronic   | SGIP1     | NA       | NA                    |
| 15145 | 1 | 89251422  | 89251422  | A | C | A | M    | intronic   | GBP3      | NA       | NA                    |
| 15145 | 1 | 141480318 | 141480318 | T | A | T | W    | intergenic | NA        | NA       | NA                    |
| 15145 | 1 | 150861975 | 150861975 | C | A | C | M    | exonic     | LCE3A     | missense | NM_178431:p.G77W      |
| 15145 | 1 | 152299638 | 152299638 | A | T | A | W    | splicing   | NUP210L   | NA       | NA                    |
| 15145 | 1 | 170019946 | 170019946 | G | T | G | K    | exonic     | METTL13   | missense | NM_014955:p.Q113H     |
| 15145 | 1 | 194718157 | 194718157 | A | C | A | M    | intronic   | KCNT2     | NA       | NA                    |
| 15145 | 1 | 210260162 | 210260162 | T | C | T | Y    | exonic     | INTS7     | missense | NM_015434:p.N99S      |
| 15145 | 1 | 245902505 | 245902505 | C | A | C | M    | exonic     | OR13G1    | missense | NM_001005487:p.W154C  |
| 15145 | 2 | 3629888   | 3629888   | C | A | C | M    | exonic     | COLEC11   | missense | NM_024027:p.A28D      |
| 15145 | 2 | 44282483  | 44282483  | G | T | G | K    | exonic     | PPM1B     | missense | NM_001033557:p.G214V  |
| 15145 | 2 | 73450909  | 73450909  | G | A | G | R    | intergenic | NA        | NA       | NA                    |
| 15145 | 2 | 90968594  | 90968594  | A | C | A | M    | intergenic | NA        | NA       | NA                    |
| 15145 | 2 | 90977396  | 90977396  | G | T | G | K    | intergenic | NA        | NA       | NA                    |
| 15145 | 2 | 102507845 | 102507845 | T | A | T | W    | intronic   | SLC9A4    | NA       | NA                    |
| 15145 | 2 | 132747019 | 132747019 | G | T | G | K    | intergenic | NA        | NA       | NA                    |
| 15145 | 2 | 139038727 | 139038727 | T | C | T | Y    | intronic   | SPOPL     | NA       | NA                    |
| 15145 | 2 | 140771876 | 140771876 | G | T | G | K    | exonic     | LRP1B     | missense | NM_018557:p.P4313Q    |
| 15145 | 2 | 185511334 | 185511334 | C | A | C | M    | exonic     | ZNF804A   | missense | NM_194250:p.T989N     |
| 15145 | 2 | 201986042 | 201986042 | A | G | A | R    | intronic   | TRAK2     | NA       | NA                    |
| 15145 | 2 | 227585149 | 227585149 | C | A | C | M    | exonic     | COL4A4    | missense | NM_000092:p.G1442V    |
| 15145 | 2 | 234523434 | 234523434 | C | A | C | M    | exonic     | TRPM8     | missense | NM_024080:p.L349M     |
| 15145 | 3 | 39144894  | 39144894  | C | T | C | Y    | exonic     | TTC21A    | missense | NM_145755:p.H538Y     |
| 15145 | 3 | 71828354  | 71828354  | C | A | C | M    | exonic     | EIF4E3    | nonsense | NM_001134651:p.E118X  |
| 15145 | 3 | 88288137  | 88288137  | G | T | G | K    | exonic     | C3orf38   | missense | NM_173824:p.D218Y     |
| 15145 | 3 | 89563128  | 89563128  | G | T | G | K    | exonic     | EPHA3     | missense | NM_005233:p.V759L     |
| 15145 | 3 | 90353827  | 90353827  | G | A | G | R    | intergenic | NA        | NA       | NA                    |
| 15145 | 3 | 90353879  | 90353879  | G | T | G | K    | intergenic | NA        | NA       | NA                    |
| 15145 | 3 | 90353929  | 90353929  | G | A | G | R    | intergenic | NA        | NA       | NA                    |
| 15145 | 3 | 90353956  | 90353956  | G | C | G | S    | intergenic | NA        | NA       | NA                    |
| 15145 | 3 | 102444412 | 102444412 | C | A | C | M    | exonic     | IMPG2     | silent   | NM_016247:p.T944T     |
| 15145 | 3 | 113187806 | 113187806 | A | T | A | W    | exonic     | ABHD10    | missense | NM_018394:p.D111V     |
| 15145 | 3 | 122822990 | 122822990 | G | T | G | K    | exonic     | FBXO40    | silent   | NM_016298:p.P8P       |
| 15145 | 3 | 142925972 | 142925972 | G | A | G | R    | intergenic | NA        | NA       | NA                    |
| 15145 | 3 | 185955195 | 185955195 | G | A | G | R    | intergenic | NA        | NA       | NA                    |
| 15145 | 3 | 192032170 | 192032170 | C | A | C | M    | intergenic | NA        | NA       | NA                    |
| 15145 | 3 | 198893887 | 198893887 | C | G | C | S    | intronic   | KIAA0226  | NA       | NA                    |
| 15145 | 4 | 896604    | 896604    | A | T | A | W    | intronic   | GAK       | NA       | NA                    |
| 15145 | 4 | 2913833   | 2913833   | C | T | C | Y    | exonic     | NOP14     | silent   | NM_003703:p.S645S     |
| 15145 | 4 | 20178224  | 20178224  | C | - | G | */-C | intronic   | SLIT2     | NA       | NA                    |
| 15145 | 4 | 126457610 | 126457610 | G | T | G | K    | exonic     | FAT4      | silent   | NM_024582:p.A198A     |
| 15145 | 4 | 171762704 | 171762704 | G | T | G | K    | ncRNA      | HSP90AA6P | NA       | NA                    |
| 15145 | 5 | 21878011  | 21878011  | A | C | A | M    | intronic   | CDH12     | NA       | NA                    |
| 15145 | 5 | 42836979  | 42836979  | T | C | T | Y    | exonic     | SEPP1     | missense | NM_001085486:p.H249R  |
| 15145 | 5 | 43702580  | 43702580  | G | T | G | K    | intronic   | NNT       | NA       | NA                    |
| 15145 | 5 | 50719122  | 50719122  | G | C | G | S    | exonic     | ISL1      | missense | NM_002202:p.S87T      |
| 15145 | 5 | 162850001 | 162850001 | G | T | G | K    | exonic     | HMMR      | missense | NM_001142557:p.A577S  |
| 15145 | 5 | 178940654 | 178940654 | A | G | A | R    | intronic   | RUFY1     | NA       | NA                    |
| 15145 | 6 | 12269852  | 12269852  | A | T | A | W    | exonic     | HIVEP1    | missense | NM_002114:p.T2228S    |
| 15145 | 6 | 26164195  | 26164195  | C | T | C | Y    | exonic     | HIST1H1C  | silent   | NM_005319:p.P147P     |
| 15145 | 6 | 28162073  | 28162073  | G | T | G | K    | intronic   | ZNF165    | NA       | NA                    |
| 15145 | 6 | 33013183  | 33013183  | G | T | G | K    | exonic     | HLA-DMB   | silent   | NM_002118:p.T122T     |
| 15145 | 6 | 35890518  | 35890518  | C | A | C | M    | exonic     | LHFPL5    | missense | NM_182548:p.D210E     |
| 15145 | 6 | 73822258  | 73822258  | A | C | A | M    | intronic   | KCNQ5     | NA       | NA                    |
| 15145 | 6 | 79757424  | 79757424  | G | A | G | R    | intronic   | PHIP      | NA       | NA                    |
| 15145 | 6 | 112789722 | 112789722 | A | T | A | W    | intergenic | NA        | NA       | NA                    |
| 15145 | 6 | 151334791 | 151334791 | G | C | G | S    | exonic     | MTHFD1L   | missense | NM_015440:p.V677L     |
| 15145 | 7 | 31344768  | 31344768  | G | C | G | S    | exonic     | NEUROD6   | missense | NM_022728:p.P214A     |
| 15145 | 7 | 77627497  | 77627497  | G | A | G | R    | exonic     | MAGI2     | missense | NM_012301:p.P876S     |
| 15145 | 7 | 81193069  | 81193069  | G | T | G | K    | intronic   | HGF       | NA       | NA                    |

|       |    |           |           |     |   |   |   |            |              |           |                        |
|-------|----|-----------|-----------|-----|---|---|---|------------|--------------|-----------|------------------------|
| 15145 | 7  | 144912067 | 144912067 | G   | A | G | R | intergenic | NA           | NA        | NA                     |
| 15145 | 8  | 39726109  | 39726109  | C   | T | C | Y | exonic     | ADAM2        | silent    | NM_001464:p.K631K      |
| 15145 | 8  | 43417280  | 43417280  | G   | T | G | K | intergenic | NA           | NA        | NA                     |
| 15145 | 8  | 113726543 | 113726543 | G   | T | G | K | exonic     | CSMD3        | missense  | NM_198123:p.T1094K     |
| 15145 | 9  | 906890    | 906890    | C   | T | C | Y | exonic     | DMRT1        | missense  | NM_021951:p.P317L      |
| 15145 | 9  | 67946792  | 67946792  | A   | G | A | R | intergenic | NA           | NA        | NA                     |
| 15145 | 9  | 74035944  | 74035944  | G   | T | G | K | intronic   | GDA          | NA        | NA                     |
| 15145 | 9  | 79983655  | 79983655  | C   | G | C | S | intergenic | NA           | NA        | NA                     |
| 15145 | 9  | 103356132 | 103356132 | A   | T | A | W | exonic     | RNF20        | missense  | NM_019592:p.D648V      |
| 15145 | 9  | 124490450 | 124490450 | G   | A | G | R | intergenic | NA           | NA        | NA                     |
| 15145 | 9  | 129310158 | 129310158 | G   | T | G | K | intronic   | FAM129B      | NA        | NA                     |
| 15145 | 10 | 39051289  | 39051289  | C   | T | C | Y | intergenic | NA           | NA        | NA                     |
| 15145 | 10 | 41685745  | 41685745  | C   | A | C | M | intergenic | NA           | NA        | NA                     |
| 15145 | 10 | 127570792 | 127570792 | A   | C | A | M | intergenic | NA           | NA        | NA                     |
| 15145 | 10 | 127573963 | 127573963 | C   | G | C | S | intergenic | NA           | NA        | NA                     |
| 15145 | 11 | 13663624  | 13663624  | A   | G | A | R | intronic   | FAR1         | NA        | NA                     |
| 15145 | 11 | 65376964  | 65376964  | A   | C | A | M | exonic     | SNX32        | missense  | NM_152760:p.N373H      |
| 15145 | 11 | 65522598  | 65522598  | G   | A | G | R | UTR3       | EIF1AD       | NA        | NA                     |
| 15145 | 11 | 115326319 | 115326319 | G   | T | G | K | intergenic | NA           | NA        | NA                     |
| 15145 | 12 | 6529236   | 6529236   | G   | A | G | R | exonic     | IFFO1        | missense  | NM_001039670:p.L340F   |
| 15145 | 12 | 125560887 | 125560887 | G   | A | G | R | intergenic | NA           | NA        | NA                     |
| 15145 | 13 | 109620952 | 109620952 | G   | T | G | K | exonic     | COL4A1       | missense  | NM_001845:p.H1229N     |
| 15145 | 13 | 109890146 | 109890146 | G   | T | G | K | exonic     | COL4A2       | missense  | NM_001846:p.G308C      |
| 15145 | 14 | 23722756  | 23722756  | G   | A | G | R | intronic   | IPO4         | NA        | NA                     |
| 15145 | 14 | 23971512  | 23971514  | GAG | - | - | - | exonic     | KHNYN        | nonFS_del | NM_015299:p.402_403del |
| 15145 | 14 | 94034410  | 94034410  | T   | C | T | Y | exonic     | SERPINA12    | silent    | NM_173850:p.S26S       |
| 15145 | 15 | 20387629  | 20387629  | G   | A | G | R | intronic   | TUBGCP5      | NA        | NA                     |
| 15145 | 15 | 76838823  | 76838823  | G   | A | G | R | exonic     | ADAMT57      | missense  | NM_014272:p.R1686C     |
| 15145 | 15 | 82653537  | 82653537  | C   | T | C | Y | ncRNA      | LOC440300    | NA        | NA                     |
| 15145 | 16 | 16116129  | 16116129  | G   | A | G | R | exonic     | ABCC1        | missense  | NM_004996:p.A1029T     |
| 15145 | 17 | 11654464  | 11654464  | G   | T | G | K | intronic   | DNAH9        | NA        | NA                     |
| 15145 | 17 | 29507412  | 29507412  | C   | G | C | S | exonic     | ACCN1        | missense  | NM_001094:p.V85L       |
| 15145 | 17 | 38108432  | 38108432  | G   | C | G | S | exonic     | EZH1         | missense  | NM_001991:p.F724L      |
| 15145 | 17 | 39444958  | 39444958  | G   | A | G | R | exonic     | TMEM101      | missense  | NM_032376:p.P213L      |
| 15145 | 17 | 45630824  | 45630824  | G   | A | G | R | exonic     | COL1A1       | missense  | NM_000088:p.S171L      |
| 15145 | 17 | 57699092  | 57699092  | G   | A | G | R | ncRNA      | TBC1D3P2     | NA        | NA                     |
| 15145 | 17 | 72134579  | 72134579  | C   | T | C | Y | intronic   | ST6GALNAC1NA | NA        | NA                     |
| 15145 | 18 | 7221499   | 7221499   | C   | G | C | S | exonic     | LRRC30       | silent    | NM_001105581:p.V121V   |
| 15145 | 18 | 33399469  | 33399469  | G   | A | G | R | exonic     | CELF4        | missense  | NM_020180:p.T45I       |
| 15145 | 19 | 10461447  | 10461447  | G   | A | G | R | exonic     | KEAP1        | missense  | NM_012289:p.R470C      |
| 15145 | 19 | 12322559  | 12322559  | A   | G | A | R | exonic     | ZNF442       | silent    | NM_030824:p.Y280Y      |
| 15145 | 19 | 19488004  | 19488004  | T   | G | T | K | upstream   | NDUFA13      | NA        | NA                     |
| 15145 | 19 | 19651295  | 19651295  | A   | G | A | R | exonic     | ZNF101       | missense  | NM_033204:p.K166R      |
| 15145 | 19 | 19906162  | 19906162  | A   | T | A | W | exonic     | ZNF93        | silent    | NM_031218:p.S466S      |
| 15145 | 19 | 22154796  | 22154796  | A   | T | A | W | exonic     | ZNF676       | silent    | NM_001001411:p.T521T   |
| 15145 | 19 | 35627704  | 35627704  | G   | T | G | K | exonic     | ZNF536       | silent    | NM_014717:p.A465A      |
| 15145 | 19 | 44667946  | 44667946  | G   | T | G | K | intronic   | TIMM50       | NA        | NA                     |
| 15145 | 19 | 60301916  | 60301916  | G   | C | G | S | intronic   | PPP1R12C     | NA        | NA                     |
| 15145 | 19 | 62531328  | 62531328  | G   | T | G | K | exonic     | ZNF543       | missense  | NM_213598:p.C229F      |
| 15145 | 20 | 2523462   | 2523462   | G   | C | G | S | intronic   | TMC2         | NA        | NA                     |
| 15145 | 21 | 9738235   | 9738235   | T   | A | T | W | intergenic | NA           | NA        | NA                     |
| 15145 | 21 | 10145950  | 10145950  | A   | T | A | W | intergenic | NA           | NA        | NA                     |
| 15145 | 21 | 33847474  | 33847474  | C   | T | C | Y | exonic     | SON          | missense  | NM_138927:p.A1356V     |
| 15145 | 22 | 25036808  | 25036808  | G   | T | G | K | ncRNA      | MIR1302-1    | NA        | NA                     |
| 15145 | 22 | 27958281  | 27958281  | G   | A | G | R | exonic     | EMID1        | missense  | NM_133455:p.G238E      |
| 15145 | 22 | 32352189  | 32352189  | G   | T | G | K | intronic   | LARGE        | NA        | NA                     |
| 15145 | X  | 49029868  | 49029868  | A   | C | A | M | exonic     | PPP1R3F      | missense  | NM_001184745:p.E245A   |
| 15145 | X  | 61647816  | 61647816  | A   | G | A | R | intergenic | NA           | NA        | NA                     |
| 15145 | X  | 61916012  | 61916012  | T   | C | T | Y | intergenic | NA           | NA        | NA                     |
| 15145 | X  | 62020601  | 62020601  | A   | G | A | R | intergenic | NA           | NA        | NA                     |
| 15145 | X  | 65325018  | 65325018  | C   | A | C | M | exonic     | HEPH         | missense  | NM_138737:p.H294N      |
| 15145 | X  | 73242643  | 73242643  | A   | G | A | R | ncRNA      | MIR374AHG    | NA        | NA                     |
| 15145 | X  | 100798906 | 100798906 | T   | A | T | W | exonic     | ARMCX2       | missense  | NM_177949:p.S109C      |
| 15145 | X  | 109581480 | 109581480 | G   | C | G | S | exonic     | RGAG1        | missense  | NM_020769:p.V327L      |
| 15145 | X  | 123443411 | 123443411 | G   | T | G | K | exonic     | ODZ1         | silent    | NM_001163279:p.V1266V  |
| 15145 | X  | 128473701 | 128473701 | G   | T | G | K | intronic   | SMARCA1      | NA        | NA                     |
| 15145 | X  | 129031368 | 129031368 | C   | T | C | Y | intronic   | ELF4         | NA        | NA                     |
| 15145 | X  | 138539479 | 138539479 | G   | A | G | R | intronic   | MCF2         | NA        | NA                     |
| 15145 | X  | 151034050 | 151034050 | C   | A | C | M | UTR3       | MAGEA5       | NA        | NA                     |
| 15145 | X  | 152639620 | 152639620 | A   | G | A | R | splicing   | BCAP31       | missense  | NM_001139457:p.W99R    |
| 15145 | X  | 152658777 | 152658777 | A   | G | A | R | exonic     | ABCD1        | missense  | NM_000033:p.N509S      |
| 15145 | X  | 152932908 | 152932908 | C   | T | C | Y | exonic     | IRAK1        | missense  | NM_001569:p.E440K      |
| 15145 | X  | 154160580 | 154160580 | G   | C | G | S | intronic   | CLIC2        | NA        | NA                     |
| 15145 | Y  | 11702019  | 11702019  | C   | T | C | Y | intergenic | NA           | NA        | NA                     |
| 15145 | Y  | 11702331  | 11702331  | G   | A | G | R | intergenic | NA           | NA        | NA                     |
| 15145 | Y  | 11810807  | 11810807  | A   | G | A | R | intergenic | NA           | NA        | NA                     |
| 15145 | Y  | 11943304  | 11943304  | T   | C | T | Y | intergenic | NA           | NA        | NA                     |
| 15145 | Y  | 11943310  | 11943310  | A   | T | A | W | intergenic | NA           | NA        | NA                     |
| 15145 | M  | 15490     | 15490     | A   | G | A | R | intergenic | NA           | NA        | NA                     |

|       |    |           |           |      |   |   |         |            |           |          |                           |
|-------|----|-----------|-----------|------|---|---|---------|------------|-----------|----------|---------------------------|
| 15637 | 1  | 142291052 | 142291052 | C    | G | C | S       | intergenic | NA        | NA       | NA                        |
| 15637 | 2  | 86158457  | 86158457  | A    | G | A | R       | intronic   | POLR1A    | NA       | NA                        |
| 15637 | 2  | 91143687  | 91143687  | C    | T | C | Y       | intergenic | NA        | NA       | NA                        |
| 15637 | 4  | 48816919  | 48816919  | C    | A | C | M       | intergenic | NA        | NA       | NA                        |
| 15637 | 4  | 48816920  | 48816920  | C    | A | C | M       | intergenic | NA        | NA       | NA                        |
| 15637 | 7  | 20706310  | 20706310  | A    | T | A | W       | intronic   | ABCB5     | NA       | NA                        |
| 15637 | 9  | 67906920  | 67906920  | G    | A | G | R       | intergenic | NA        | NA       | NA                        |
| 15637 | 14 | 38697432  | 38697432  | T    | G | T | K       | intronic   | TRAPPC6B  | NA       | NA                        |
| 15637 | 20 | 47995494  | 47995494  | C    | G | C | S       | intronic   | RNF114    | NA       | NA                        |
| 15637 | X  | 15172736  | 15172736  | A    | G | A | R       | intronic   | ASB9      | NA       | NA                        |
| 15822 | 1  | 41381309  | 41381309  | C    | T | C | Y       | exonic     | SCMH1     | silent   | NM_001172219:p.R80R       |
| 15822 | 1  | 141481822 | 141481822 | G    | A | G | R       | intergenic | NA        | NA       | NA                        |
| 15822 | 2  | 90976553  | 90976553  | G    | T | G | K       | intergenic | NA        | NA       | NA                        |
| 15822 | 2  | 172358391 | 172358391 | G    | C | G | S       | exonic     | SLC25A12  | missense | NM_003705:p.L480V         |
| 15822 | 3  | 149942327 | 149942327 | G    | A | G | R       | exonic     | AGTR1     | missense | NM_009585:p.R272H         |
| 15822 | 4  | 48800676  | 48800676  | G    | T | G | K       | intergenic | NA        | NA       | NA                        |
| 15822 | 5  | 37121340  | 37121340  | T    | C | T | Y       | intergenic | NA        | NA       | NA                        |
| 15822 | 5  | 64860243  | 64860243  | C    | A | C | M       | intronic   | CENPK     | NA       | NA                        |
| 15822 | 5  | 87538846  | 87538846  | T    | A | T | W       | intronic   | TMEM161B  | NA       | NA                        |
| 15822 | 6  | 146285240 | 146285240 | G    | A | G | R       | intronic   | SHPRH     | NA       | NA                        |
| 15822 | 7  | 42802693  | 42802693  | A    | C | A | M       | intergenic | NA        | NA       | NA                        |
| 15822 | 7  | 57936761  | 57936761  | T    | A | T | W       | intergenic | NA        | NA       | NA                        |
| 15822 | 7  | 141158398 | 141158398 | C    | A | C | M       | intergenic | NA        | NA       | NA                        |
| 15822 | 9  | 67915968  | 67915968  | C    | T | C | Y       | intergenic | NA        | NA       | NA                        |
| 15822 | 9  | 67916157  | 67916157  | T    | C | T | Y       | intergenic | NA        | NA       | NA                        |
| 15822 | 9  | 67917996  | 67917996  | A    | G | A | R       | ncRNA      | LOC642236 | NA       | NA                        |
| 15822 | 9  | 67921301  | 67921301  | G    | C | G | S       | ncRNA      | LOC642236 | NA       | NA                        |
| 15822 | 10 | 18479788  | 18479788  | G    | T | G | K       | intronic   | CACNB2    | NA       | NA                        |
| 15822 | 10 | 71660200  | 71660200  | T    | C | T | Y       | intronic   | PPA1      | NA       | NA                        |
| 15822 | 11 | 111546346 | 111546346 | T    | A | T | W       | intronic   | TEX12     | NA       | NA                        |
| 15822 | 12 | 1162662   | 1162662   | A    | C | A | M       | ncRNA      | ERC1      | NA       | NA                        |
| 15822 | 14 | 19176625  | 19176625  | C    | T | C | Y       | intergenic | NA        | NA       | NA                        |
| 15822 | 14 | 70269388  | 70269388  | C    | T | C | Y       | exonic     | MAP3K9    | silent   | NM_033141:p.K831K         |
| 15822 | 14 | 88143959  | 88143959  | T    | C | T | Y       | intronic   | ZC3H14    | NA       | NA                        |
| 15822 | 15 | 39600027  | 39600027  | G    | C | G | S       | exonic     | RPAP1     | missense | NM_015540:p.H1217D        |
| 15822 | 17 | 7520046   | 7520047   | CA   | - | T | */-CA   | exonic     | TP53      | FS_del   | NM_001126113:p.122_122del |
| 15822 | 17 | 7623316   | 7623316   | A    | C | A | M       | exonic     | DNAH2     | missense | NM_020877:p.N1858H        |
| 15822 | 17 | 45270997  | 45270997  | G    | C | G | S       | UTR3       | TAC4      | NA       | NA                        |
| 15822 | 18 | 99468     | 99468     | T    | G | T | K       | ncRNA      | ROCK1P1   | NA       | NA                        |
| 15822 | 18 | 16771423  | 16771423  | T    | G | T | K       | intergenic | NA        | NA       | NA                        |
| 15822 | 20 | 28248461  | 28248461  | C    | T | C | Y       | downstream | FRG1B     | NA       | NA                        |
| 15822 | 20 | 28261075  | 28261075  | C    | G | C | S       | intergenic | NA        | NA       | NA                        |
| 15822 | 20 | 28264249  | 28264249  | A    | G | A | R       | intergenic | NA        | NA       | NA                        |
| 15822 | Y  | 57439167  | 57439167  | C    | G | C | S       | intergenic | NA        | NA       | NA                        |
| 15822 | M  | 8314      | 8314      | G    | A | G | R       | intergenic | NA        | NA       | NA                        |
| 15858 | 1  | 16842158  | 16842158  | G    | A | G | R       | intergenic | NA        | NA       | NA                        |
| 15858 | 1  | 108110855 | 108110855 | G    | A | G | R       | intronic   | VAV3      | NA       | NA                        |
| 15858 | 1  | 141482100 | 141482100 | G    | A | G | R       | intergenic | NA        | NA       | NA                        |
| 15858 | 1  | 141825721 | 141825721 | T    | C | T | Y       | intergenic | NA        | NA       | NA                        |
| 15858 | 1  | 142291040 | 142291040 | G    | A | G | R       | intergenic | NA        | NA       | NA                        |
| 15858 | 1  | 144150303 | 144150303 | T    | C | T | Y       | exonic     | TXNIP     | silent   | NM_006472:p.A48A          |
| 15858 | 1  | 151044334 | 151044334 | C    | A | C | M       | exonic     | LCE1C     | missense | NM_178351:p.R82L          |
| 15858 | 1  | 156162351 | 156162351 | C    | A | C | M       | intergenic | NA        | NA       | NA                        |
| 15858 | 1  | 156162352 | 156162352 | C    | T | G | K       | intergenic | NA        | NA       | NA                        |
| 15858 | 1  | 156701917 | 156701917 | G    | G | C | S       | upstream   | OR10K1    | NA       | NA                        |
| 15858 | 1  | 160234717 | 160234717 | T    | G | T | K       | exonic     | OLFML2B   | missense | NM_015441:p.E332D         |
| 15858 | 1  | 202670334 | 202670334 | C    | A | C | M       | exonic     | PIK3C2B   | missense | NM_002646:p.C1181F        |
| 15858 | 1  | 240343826 | 240343826 | T    | A | T | W       | exonic     | PLD5      | silent   | NM_001195812:p.T145T      |
| 15858 | 2  | 42878698  | 42878698  | A    | T | A | W       | intergenic | NA        | NA       | NA                        |
| 15858 | 2  | 71724639  | 71724639  | G    | T | G | K       | exonic     | DYSF      | missense | NM_001130987:p.A1522S     |
| 15858 | 2  | 132066160 | 132066160 | G    | T | G | K       | ncRNA      | POTEKP    | NA       | NA                        |
| 15858 | 2  | 132737380 | 132737380 | A    | C | A | M       | intergenic | NA        | NA       | NA                        |
| 15858 | 2  | 132737383 | 132737383 | C    | G | C | S       | intergenic | NA        | NA       | NA                        |
| 15858 | 2  | 144242059 | 144242059 | T    | A | T | W       | exonic     | ARHGAP15  | missense | NM_018460:p.S426T         |
| 15858 | 3  | 99370847  | 99370847  | C    | A | C | M       | exonic     | OR5H15    | nonsense | NM_001005515:p.S205X      |
| 15858 | 3  | 114804473 | 114804473 | T    | C | T | Y       | intronic   | SIDT1     | NA       | NA                        |
| 15858 | 3  | 114996688 | 114996688 | G    | T | G | K       | exonic     | ATP6V1A   | missense | NM_001690:p.R391S         |
| 15858 | 3  | 115552570 | 115552570 | C    | G | C | S       | exonic     | ZBTB20    | missense | NM_001164346:p.E276Q      |
| 15858 | 3  | 126948853 | 126948853 | C    | T | C | Y       | intergenic | NA        | NA       | NA                        |
| 15858 | 3  | 141764424 | 141764424 | G    | T | G | K       | exonic     | CLSTN2    | missense | NM_022131:p.R765L         |
| 15858 | 3  | 142488825 | 142488828 | CTCT | - | A | */-CTCT | intronic   | ACPL2     | NA       | NA                        |
| 15858 | 3  | 152557726 | 152557726 | G    | C | G | S       | exonic     | MED12L    | silent   | NM_053002:p.L864L         |
| 15858 | 3  | 156338584 | 156338584 | G    | T | G | K       | splicing   | MME       | NA       | NA                        |
| 15858 | 3  | 184406537 | 184406537 | T    | A | T | W       | intronic   | MCF2L2    | NA       | NA                        |
| 15858 | 3  | 187820392 | 187820392 | T    | A | T | W       | exonic     | AHSG      | missense | NM_001622:p.V243D         |
| 15858 | 3  | 195544917 | 195544917 | G    | A | G | R       | exonic     | CPN2      | silent   | NM_001080513:p.G70G       |
| 15858 | 4  | 69494133  | 69494133  | C    | - | G | */-C    | intronic   | TMPRSS11E | NA       | NA                        |
| 15858 | 4  | 160148349 | 160148349 | C    | A | C | M       | intronic   | C4orf45   | NA       | NA                        |
| 15858 | 4  | 160148350 | 160148350 | C    | A | C | M       | intronic   | C4orf45   | NA       | NA                        |

|       |    |           |           |   |   |   |      |            |           |          |                      |
|-------|----|-----------|-----------|---|---|---|------|------------|-----------|----------|----------------------|
| 15858 | 4  | 191042541 | 191042541 | C | T | C | Y    | intergenic | NA        | NA       | NA                   |
| 15858 | 4  | 191121502 | 191121502 | T | A | T | W    | downstream | FRG1      | NA       | NA                   |
| 15858 | 6  | 29502694  | 29502694  | C | A | C | M    | exonic     | OR11A1    | missense | NM_013937:p.R235M    |
| 15858 | 6  | 42575482  | 42575482  | C | A | C | M    | intergenic | NA        | NA       | NA                   |
| 15858 | 7  | 47861096  | 47861096  | C | A | C | M    | exonic     | PKD1L1    | nonsense | NM_138295:p.E1590X   |
| 15858 | 7  | 64076200  | 64076200  | C | A | C | M    | exonic     | ZNF117    | missense | NM_015852:p.G395V    |
| 15858 | 7  | 73607760  | 73607760  | G | T | G | K    | splicing   | GTF2IRD1  | nonsense | NM_001199207:p.E707X |
| 15858 | 7  | 88261718  | 88261718  | C | A | C | M    | exonic     | C7orf62   | missense | NM_152706:p.D159Y    |
| 15858 | 7  | 88794748  | 88794748  | T | A | T | W    | intronic   | ZNF804B   | NA       | NA                   |
| 15858 | 7  | 91469115  | 91469115  | A | G | A | R    | exonic     | AKAP9     | missense | NM_005751:p.I650V    |
| 15858 | 7  | 102183223 | 102183223 | T | G | T | K    | ncRNA      | FAM185A   | NA       | NA                   |
| 15858 | 7  | 106296511 | 106296511 | G | A | G | R    | exonic     | PIK3CG    | silent   | NM_002649:p.L423L    |
| 15858 | 7  | 106332952 | 106332952 | A | G | A | R    | exonic     | PIK3CG    | missense | NM_002649:p.K1065E   |
| 15858 | 7  | 137981591 | 137981591 | G | A | G | R    | intronic   | SVOPL     | NA       | NA                   |
| 15858 | 7  | 142350480 | 142350480 | C | - | A | */-C | intronic   | KEL       | NA       | NA                   |
| 15858 | 7  | 158718734 | 158718734 | G | C | G | S    | intergenic | NA        | NA       | NA                   |
| 15858 | 8  | 87629779  | 87629779  | G | A | G | R    | splicing   | CPNE3     | NA       | NA                   |
| 15858 | 8  | 145555074 | 145555074 | G | C | G | S    | exonic     | GPR172A   | missense | NM_024531:p.G340R    |
| 15858 | 9  | 30764739  | 30764739  | C | A | C | M    | intergenic | NA        | NA       | NA                   |
| 15858 | 9  | 32666294  | 32666294  | C | A | C | M    | intergenic | NA        | NA       | NA                   |
| 15858 | 9  | 66210770  | 66210770  | A | C | A | M    | intergenic | NA        | NA       | NA                   |
| 15858 | 9  | 67904282  | 67904282  | A | G | A | R    | intergenic | NA        | NA       | NA                   |
| 15858 | 10 | 17020982  | 17020982  | A | T | A | W    | exonic     | CUBN      | missense | NM_001081:p.Y1907N   |
| 15858 | 10 | 18868283  | 18868283  | C | A | C | M    | exonic     | CACNB2    | missense | NM_000724:p.A481D    |
| 15858 | 10 | 22658103  | 22658103  | A | G | A | R    | intronic   | BMI1      | NA       | NA                   |
| 15858 | 10 | 31789988  | 31789988  | T | A | T | W    | exonic     | ZEB1      | silent   | NM_001128128:p.T8T   |
| 15858 | 10 | 41937087  | 41937087  | T | C | T | Y    | intergenic | NA        | NA       | NA                   |
| 15858 | 11 | 490634    | 490634    | G | A | G | R    | exonic     | RNH1      | missense | NM_203384:p.T41M     |
| 15858 | 11 | 55503896  | 55503896  | G | A | G | R    | ncRNA      | OR7E5P    | NA       | NA                   |
| 15858 | 11 | 55503897  | 55503897  | G | T | G | K    | ncRNA      | OR7E5P    | NA       | NA                   |
| 15858 | 12 | 13111161  | 13111161  | C | T | C | Y    | intronic   | KIAA1467  | NA       | NA                   |
| 15858 | 12 | 16445899  | 16445899  | A | G | A | R    | intergenic | NA        | NA       | NA                   |
| 15858 | 12 | 23628839  | 23628839  | T | A | T | W    | intronic   | SOX5      | NA       | NA                   |
| 15858 | 12 | 37333973  | 37333973  | T | G | T | K    | exonic     | CPNE8     | missense | NM_153634:p.H558P    |
| 15858 | 12 | 48635477  | 48635477  | C | A | C | M    | exonic     | AQP2      | missense | NM_000486:p.A212D    |
| 15858 | 12 | 51197552  | 51197552  | C | T | C | Y    | intronic   | KRT5      | NA       | NA                   |
| 15858 | 12 | 52164259  | 52164259  | C | T | C | Y    | intronic   | MAP3K12   | NA       | NA                   |
| 15858 | 12 | 74185242  | 74185242  | C | A | C | M    | intronic   | KRR1      | NA       | NA                   |
| 15858 | 12 | 86898281  | 86898281  | C | G | C | S    | intronic   | C12orf50  | NA       | NA                   |
| 15858 | 12 | 91625520  | 91625520  | G | T | G | K    | UTR3       | C12orf74  | NA       | NA                   |
| 15858 | 12 | 105820101 | 105820101 | C | A | C | M    | intergenic | NA        | NA       | NA                   |
| 15858 | 12 | 106553265 | 106553265 | C | G | C | S    | exonic     | BTBD11    | missense | NM_001017523:p.T439R |
| 15858 | 12 | 108420208 | 108420208 | C | A | C | M    | intronic   | UBE3B     | NA       | NA                   |
| 15858 | 12 | 123523486 | 123523486 | C | T | C | Y    | exonic     | NCOR2     | missense | NM_001077261:p.V186I |
| 15858 | 13 | 21003623  | 21003623  | C | A | C | M    | intronic   | EFHA1     | NA       | NA                   |
| 15858 | 14 | 22946048  | 22946048  | G | T | G | K    | intronic   | MYH6      | NA       | NA                   |
| 15858 | 14 | 22971645  | 22971645  | C | A | C | M    | intronic   | MYH7      | NA       | NA                   |
| 15858 | 14 | 75702821  | 75702821  | A | T | A | W    | exonic     | C14orf118 | missense | NM_017972:p.Q242L    |
| 15858 | 14 | 95002088  | 95002088  | G | T | G | K    | exonic     | C14orf49  | missense | NM_152592:p.P187H    |
| 15858 | 15 | 38834087  | 38834087  | C | A | C | M    | splicing   | FAM82A2   | missense | NM_018145:p.V63L     |
| 15858 | 15 | 76846812  | 76846812  | G | T | G | K    | exonic     | ADAMT57   | silent   | NM_014272:p.P941P    |
| 15858 | 15 | 89596467  | 89596467  | C | A | C | M    | intronic   | SV2B      | NA       | NA                   |
| 15858 | 16 | 30641416  | 30641416  | G | A | G | R    | exonic     | SRCAP     | silent   | NM_006662:p.G1246G   |
| 15858 | 16 | 33883324  | 33883324  | T | C | T | Y    | intergenic | NA        | NA       | NA                   |
| 15858 | 16 | 46823319  | 46823319  | C | A | C | M    | exonic     | ABCC11    | missense | NM_032583:p.R55      |
| 15858 | 17 | 20433741  | 20433741  | C | A | C | M    | intergenic | NA        | NA       | NA                   |
| 15858 | 17 | 55114396  | 55114396  | T | G | T | K    | intronic   | CLTC      | NA       | NA                   |
| 15858 | 17 | 55114423  | 55114423  | A | T | A | W    | exonic     | CLTC      | missense | NM_004859:p.E1151V   |
| 15858 | 18 | 16766315  | 16766315  | A | G | A | R    | intergenic | NA        | NA       | NA                   |
| 15858 | 18 | 21932947  | 21932947  | C | A | C | M    | intergenic | NA        | NA       | NA                   |
| 15858 | 19 | 2684122   | 2684122   | T | A | T | W    | exonic     | SLC39A3   | missense | NM_144564:p.Q191L    |
| 15858 | 19 | 15886607  | 15886607  | T | C | T | Y    | exonic     | CYP4F11   | missense | NM_021187:p.D405G    |
| 15858 | 19 | 35626600  | 35626600  | C | A | C | M    | exonic     | ZNF536    | missense | NM_014717:p.N97K     |
| 15858 | 19 | 38209157  | 38209157  | C | T | C | Y    | intronic   | RHPN2     | NA       | NA                   |
| 15858 | 19 | 42859019  | 42859019  | C | A | C | M    | intronic   | ZNF781    | NA       | NA                   |
| 15858 | 19 | 47954057  | 47954057  | C | T | C | Y    | exonic     | PSG8      | missense | NM_001130167:p.E216K |
| 15858 | 19 | 49583533  | 49583533  | C | A | C | M    | exonic     | ZNF285    | silent   | NM_152354:p.G238G    |
| 15858 | 20 | 28267174  | 28267174  | C | T | C | Y    | intergenic | NA        | NA       | NA                   |
| 15858 | 20 | 40180567  | 40180567  | A | - | G | */-A | intronic   | PTPRT     | NA       | NA                   |
| 15858 | 20 | 40180569  | 40180569  | G | T | G | K    | intronic   | PTPRT     | NA       | NA                   |
| 15858 | 20 | 43482179  | 43482179  | C | A | C | M    | intronic   | PIGT      | NA       | NA                   |
| 15858 | 20 | 51305578  | 51305578  | C | A | C | M    | exonic     | TSHZ2     | missense | NM_173485:p.T725K    |
| 15858 | 20 | 51306515  | 51306515  | C | T | C | Y    | UTR3       | TSHZ2     | NA       | NA                   |
| 15858 | 20 | 55621595  | 55621595  | C | A | C | M    | exonic     | ZBP1      | missense | NM_001160419:p.D234Y |
| 15858 | 21 | 30642563  | 30642563  | G | T | G | K    | downstream | KRTAP23-1 | NA       | NA                   |
| 15858 | 22 | 23353459  | 23353459  | G | A | G | R    | exonic     | GGT1      | missense | NM_001032365:p.D361N |
| 15858 | X  | 135560223 | 135560223 | G | T | G | K    | splicing   | CD40LG    | NA       | NA                   |
| 15858 | Y  | 11909367  | 11909367  | C | T | C | Y    | intergenic | NA        | NA       | NA                   |
| 15858 | Y  | 57411489  | 57411489  | T | C | T | Y    | intergenic | NA        | NA       | NA                   |



|       |   |           |           |   |   |   |   |            |          |          |                       |
|-------|---|-----------|-----------|---|---|---|---|------------|----------|----------|-----------------------|
| 15858 | Y | 57426642  | 57426642  | C | T | C | Y | intergenic | NA       | NA       | NA                    |
| 16246 | 1 | 11172359  | 11172359  | T | A | T | W | exonic     | ANGPTL7  | missense | NM_021146:p.C46S      |
| 16246 | 1 | 15661827  | 15661827  | C | A | C | M | exonic     | CELA2A   | silent   | NM_033440:p.T80T      |
| 16246 | 1 | 20121760  | 20121760  | T | C | T | Y | exonic     | PLA2G2E  | missense | NM_014589:p.Y39C      |
| 16246 | 1 | 20313338  | 20313338  | A | T | A | W | splicing   | PLA2G2D  | silent   | NM_012400:p.S98S      |
| 16246 | 1 | 20871287  | 20871287  | A | T | A | W | intronic   | KIF17    | NA       | NA                    |
| 16246 | 1 | 40008527  | 40008527  | T | A | T | W | exonic     | OXCT2    | missense | NM_022120:p.I330F     |
| 16246 | 1 | 55294187  | 55294187  | G | C | G | S | intronic   | PCSK9    | NA       | NA                    |
| 16246 | 1 | 62476560  | 62476560  | G | T | G | K | exonic     | KANK4    | missense | NM_181712:p.Q989K     |
| 16246 | 1 | 62837002  | 62837002  | C | A | C | M | exonic     | ANGPTL3  | silent   | NM_014495:p.T181T     |
| 16246 | 1 | 66607021  | 66607021  | C | A | C | M | intronic   | PDE4B    | NA       | NA                    |
| 16246 | 1 | 74811706  | 74811706  | G | A | G | R | exonic     | C1orf173 | missense | NM_001002912:p.S759F  |
| 16246 | 1 | 85185304  | 85185304  | T | C | T | Y | splicing   | MCOLN2   | missense | NM_153259:p.T283A     |
| 16246 | 1 | 86364471  | 86364471  | G | T | G | K | exonic     | COL24A1  | missense | NM_152890:p.H46N      |
| 16246 | 1 | 100231788 | 100231788 | A | G | A | R | exonic     | SLC35A3  | silent   | NM_012243:p.L30L      |
| 16246 | 1 | 114325516 | 114325516 | G | T | G | K | exonic     | OLFML3   | missense | NM_020190:p.D275Y     |
| 16246 | 1 | 141479432 | 141479432 | G | A | G | R | intergenic | NA       | NA       | NA                    |
| 16246 | 1 | 141859546 | 141859546 | G | A | G | R | intergenic | NA       | NA       | NA                    |
| 16246 | 1 | 142354824 | 142354824 | A | T | A | W | intergenic | NA       | NA       | NA                    |
| 16246 | 1 | 143729173 | 143729173 | G | T | G | K | intronic   | PDE4DIP  | NA       | NA                    |
| 16246 | 1 | 143729177 | 143729177 | G | T | G | K | intronic   | PDE4DIP  | NA       | NA                    |
| 16246 | 1 | 145105758 | 145105758 | T | A | T | W | intronic   | PRKAB2   | NA       | NA                    |
| 16246 | 1 | 145847184 | 145847184 | C | A | C | M | exonic     | GJA8     | missense | NM_005267:p.L160I     |
| 16246 | 1 | 147607427 | 147607427 | G | T | G | K | intergenic | NA       | NA       | NA                    |
| 16246 | 1 | 149639405 | 149639405 | G | T | G | K | intronic   | PSMB4    | NA       | NA                    |
| 16246 | 1 | 150325925 | 150325925 | G | C | G | S | exonic     | TCHHL1   | missense | NM_001008536:p.S286C  |
| 16246 | 1 | 150457950 | 150457950 | C | A | C | M | exonic     | HRNR     | missense | NM_001009931:p.G927C  |
| 16246 | 1 | 150553519 | 150553519 | G | T | G | K | exonic     | FLG      | missense | NM_002016:p.S156Y     |
| 16246 | 1 | 150638746 | 150638746 | C | A | C | M | intergenic | NA       | NA       | NA                    |
| 16246 | 1 | 151123600 | 151123600 | C | G | C | S | exonic     | SMCP     | missense | NM_030663:p.C26W      |
| 16246 | 1 | 152380601 | 152380601 | C | A | C | M | exonic     | NUP210L  | missense | NM_207308:p.G166W     |
| 16246 | 1 | 152475642 | 152475642 | C | G | C | S | intronic   | UBAP2L   | NA       | NA                    |
| 16246 | 1 | 153185812 | 153185812 | T | G | T | K | exonic     | PBXIP1   | missense | NM_020524:p.E321A     |
| 16246 | 1 | 153530982 | 153530982 | C | G | C | S | exonic     | PKLR     | missense | NM_000298:p.V294L     |
| 16246 | 1 | 153537847 | 153537847 | A | G | A | R | UTR5       | PKLR     | NA       | NA                    |
| 16246 | 1 | 153849172 | 153849172 | C | T | C | Y | intronic   | MSTO1    | NA       | NA                    |
| 16246 | 1 | 155985059 | 155985059 | G | C | G | S | intronic   | FCRL2    | NA       | NA                    |
| 16246 | 1 | 156566035 | 156566035 | C | A | C | M | exonic     | CD1B     | missense | NM_001764:p.G212V     |
| 16246 | 1 | 156873075 | 156873075 | C | A | C | M | exonic     | SPTA1    | missense | NM_003126:p.A1764S    |
| 16246 | 1 | 156880913 | 156880913 | G | A | G | R | intronic   | SPTA1    | NA       | NA                    |
| 16246 | 1 | 157002408 | 157002408 | G | A | G | R | exonic     | OR6N1    | missense | NM_001005185:p.S230L  |
| 16246 | 1 | 157002409 | 157002409 | A | T | A | W | exonic     | OR6N1    | missense | NM_001005185:p.S230T  |
| 16246 | 1 | 157642781 | 157642781 | C | A | C | M | intergenic | NA       | NA       | NA                    |
| 16246 | 1 | 158155223 | 158155223 | C | A | C | M | exonic     | TAGLN2   | missense | NM_003564:p.Q197H     |
| 16246 | 1 | 158433959 | 158433959 | T | A | T | W | intronic   | CASQ1    | NA       | NA                    |
| 16246 | 1 | 158727177 | 158727177 | T | C | T | Y | intronic   | SLAMF6   | NA       | NA                    |
| 16246 | 1 | 159131777 | 159131777 | G | A | G | R | intergenic | NA       | NA       | NA                    |
| 16246 | 1 | 161012090 | 161012090 | G | T | G | K | exonic     | DDR2     | missense | NM_001014796:p.K627N  |
| 16246 | 1 | 161383898 | 161383898 | G | T | G | K | exonic     | RG55     | missense | NM_001195303:p.T27N   |
| 16246 | 1 | 164306292 | 164306292 | A | T | A | W | exonic     | FAM78B   | missense | NM_001017961:p.V199E  |
| 16246 | 1 | 172197666 | 172197666 | T | A | T | W | exonic     | RC3H1    | silent   | NM_172071:p.R674R     |
| 16246 | 1 | 177824537 | 177824537 | G | C | G | S | intergenic | NA       | NA       | NA                    |
| 16246 | 1 | 177926434 | 177926434 | G | T | G | K | intronic   | TDRD5    | NA       | NA                    |
| 16246 | 1 | 178432477 | 178432477 | G | C | G | S | exonic     | QSOX1    | missense | NM_002826:p.L642F     |
| 16246 | 1 | 182855270 | 182855270 | C | T | C | Y | intronic   | C1orf21  | NA       | NA                    |
| 16246 | 1 | 189382354 | 189382354 | G | T | G | K | intergenic | NA       | NA       | NA                    |
| 16246 | 1 | 209099744 | 209099744 | C | G | C | S | intronic   | KCNH1    | NA       | NA                    |
| 16246 | 1 | 210865913 | 210865913 | C | G | C | S | exonic     | FAM71A   | missense | NM_153606:p.S357R     |
| 16246 | 1 | 213858926 | 213858926 | G | C | G | S | exonic     | KCTD3    | missense | NM_016121:p.R546S     |
| 16246 | 1 | 216022203 | 216022203 | G | T | G | K | exonic     | SPATA17  | missense | NM_138796:p.R263L     |
| 16246 | 1 | 220810522 | 220810522 | G | A | G | R | exonic     | TAF1A    | missense | NM_005681:p.P238L     |
| 16246 | 1 | 229541969 | 229541969 | G | A | G | R | intronic   | C1orf124 | NA       | NA                    |
| 16246 | 1 | 234974525 | 234974525 | A | T | A | W | intronic   | ACTN2    | NA       | NA                    |
| 16246 | 1 | 238138096 | 238138096 | A | T | A | W | exonic     | CHRM3    | missense | NM_000740:p.Y241F     |
| 16246 | 1 | 244088556 | 244088556 | C | A | C | M | exonic     | SMYD3    | missense | NM_001167740:p.S314I  |
| 16246 | 1 | 246125629 | 246125629 | G | T | G | K | exonic     | OR2W3    | missense | NM_001001957:p.V40L   |
| 16246 | 1 | 246205296 | 246205296 | A | T | A | W | intronic   | OR2L13   | NA       | NA                    |
| 16246 | 1 | 246469379 | 246469379 | C | T | C | Y | exonic     | OR2M4    | missense | NM_017504:p.H176Y     |
| 16246 | 1 | 246703210 | 246703210 | C | A | C | M | upstream   | OR2T3    | NA       | NA                    |
| 16246 | 1 | 246703211 | 246703211 | C | A | C | M | upstream   | OR2T3    | NA       | NA                    |
| 16246 | 2 | 24114239  | 24114239  | G | A | G | R | exonic     | C2orf44  | nonsense | NM_001142319:p.Q544X  |
| 16246 | 2 | 27510247  | 27510247  | G | T | G | K | intronic   | NRBP1    | NA       | NA                    |
| 16246 | 2 | 32313966  | 32313966  | G | T | G | K | intronic   | NLR4     | NA       | NA                    |
| 16246 | 2 | 33918999  | 33918999  | G | C | G | S | intergenic | NA       | NA       | NA                    |
| 16246 | 2 | 37121791  | 37121791  | G | T | G | K | exonic     | HEATR5B  | missense | NM_019024:p.P949T     |
| 16246 | 2 | 39850549  | 39850549  | C | A | C | M | exonic     | THUMP2D  | missense | NM_025264:p.R159S     |
| 16246 | 2 | 73535794  | 73535794  | C | T | C | Y | intronic   | ALMS1    | NA       | NA                    |
| 16246 | 2 | 73927983  | 73927983  | G | A | G | R | intronic   | STAMB2   | NA       | NA                    |
| 16246 | 2 | 74444045  | 74444045  | C | A | C | M | exonic     | DCTN1    | missense | NM_001135040:p.A1052S |

|       |   |           |           |   |   |   |      |            |            |          |                      |
|-------|---|-----------|-----------|---|---|---|------|------------|------------|----------|----------------------|
| 16246 | 2 | 74609564  | 74609564  | G | A | G | R    | exonic     | AUP1       | missense | NM_181575:p.L116F    |
| 16246 | 2 | 79108932  | 79108932  | C | T | C | Y    | UTR3       | REG3G      | NA       | NA                   |
| 16246 | 2 | 81277777  | 81277777  | G | C | G | S    | intergenic | NA         | NA       | NA                   |
| 16246 | 2 | 90961664  | 90961664  | G | C | G | S    | intergenic | NA         | NA       | NA                   |
| 16246 | 2 | 90977369  | 90977369  | G | C | G | S    | intergenic | NA         | NA       | NA                   |
| 16246 | 2 | 101277905 | 101277905 | T | C | T | Y    | exonic     | RNF149     | missense | NM_173647:p.M211V    |
| 16246 | 2 | 106328135 | 106328135 | G | T | G | K    | intergenic | NA         | NA       | NA                   |
| 16246 | 2 | 107975079 | 107975079 | A | T | A | W    | exonic     | SLC5A7     | silent   | NM_021815:p.P88P     |
| 16246 | 2 | 113536563 | 113536563 | G | T | G | K    | exonic     | IL1F5      | silent   | NM_173170:p.R102R    |
| 16246 | 2 | 128620020 | 128620020 | C | T | C | Y    | ncRNA      | UGGT1      | NA       | NA                   |
| 16246 | 2 | 140918550 | 140918550 | A | T | A | W    | intronic   | LRP1B      | NA       | NA                   |
| 16246 | 2 | 141324134 | 141324134 | C | G | C | S    | intronic   | LRP1B      | NA       | NA                   |
| 16246 | 2 | 155419966 | 155419966 | G | T | G | K    | exonic     | KCNJ3      | silent   | NM_002239:p.V467V    |
| 16246 | 2 | 170950990 | 170950990 | G | A | G | R    | exonic     | MYO3B      | missense | NM_138995:p.A446T    |
| 16246 | 2 | 182107292 | 182107292 | G | A | G | R    | exonic     | ITGA4      | missense | NM_000885:p.E945K    |
| 16246 | 2 | 200184890 | 200184890 | C | A | C | M    | intergenic | NA         | NA       | NA                   |
| 16246 | 2 | 209753727 | 209753727 | C | A | C | M    | intergenic | NA         | NA       | NA                   |
| 16246 | 2 | 234191412 | 234191412 | C | A | C | M    | exonic     | UGT1A8     | missense | NM_019076:p.S107Y    |
| 16246 | 3 | 634659    | 634659    | G | A | G | R    | intergenic | NA         | NA       | NA                   |
| 16246 | 3 | 1418203   | 1418203   | A | T | A | W    | exonic     | CNTN6      | missense | NM_014461:p.N931Y    |
| 16246 | 3 | 12804727  | 12804727  | G | - | C | */-G | intergenic | NA         | NA       | NA                   |
| 16246 | 3 | 12831847  | 12831847  | G | T | G | K    | exonic     | CAND2      | missense | NM_001162499:p.R405L |
| 16246 | 3 | 21442057  | 21442057  | G | T | G | K    | exonic     | ZNF385D    | silent   | NM_024697:p.G261G    |
| 16246 | 3 | 32047139  | 32047139  | C | A | C | M    | intergenic | NA         | NA       | NA                   |
| 16246 | 3 | 45900507  | 45900507  | G | A | G | R    | intergenic | NA         | NA       | NA                   |
| 16246 | 3 | 66513680  | 66513680  | T | G | T | K    | intronic   | LRIG1      | NA       | NA                   |
| 16246 | 3 | 75488961  | 75488961  | C | G | C | S    | intergenic | NA         | NA       | NA                   |
| 16246 | 3 | 106953126 | 106953126 | C | A | C | M    | exonic     | CBLB       | missense | NM_170662:p.R198I    |
| 16246 | 3 | 122823258 | 122823258 | G | T | G | K    | exonic     | FBXO40     | nonsense | NM_016298:p.E98X     |
| 16246 | 3 | 124995298 | 124995298 | C | A | C | M    | exonic     | MYLK       | missense | NM_053028:p.M27I     |
| 16246 | 3 | 125860012 | 125860012 | G | T | G | K    | exonic     | KALRN      | silent   | NM_007064:p.P329P    |
| 16246 | 3 | 125860013 | 125860013 | C | T | C | Y    | exonic     | KALRN      | missense | NM_007064:p.R330C    |
| 16246 | 3 | 128876009 | 128876009 | G | T | G | K    | ncRNA      | ABTB1      | NA       | NA                   |
| 16246 | 3 | 150025717 | 150025717 | G | T | G | K    | intergenic | NA         | NA       | NA                   |
| 16246 | 3 | 157314645 | 157314645 | A | T | A | W    | intergenic | NA         | NA       | NA                   |
| 16246 | 3 | 158010744 | 158010744 | T | A | T | W    | ncRNA      | PA2G4P4    | NA       | NA                   |
| 16246 | 3 | 168560351 | 168560351 | C | G | C | S    | splicing   | ZBBX       | NA       | NA                   |
| 16246 | 3 | 168667651 | 168667651 | G | A | G | R    | exonic     | SERPINI2   | nonsense | NM_006217:p.Q122X    |
| 16246 | 3 | 185238462 | 185238462 | C | T | C | Y    | intronic   | HTR3D      | NA       | NA                   |
| 16246 | 3 | 187817687 | 187817687 | C | A | C | M    | exonic     | AHSG       | missense | NM_001622:p.R143S    |
| 16246 | 3 | 187878205 | 187878205 | C | T | C | Y    | exonic     | HRG        | missense | NM_000412:p.P473S    |
| 16246 | 3 | 188925326 | 188925326 | - | C | A | */+C | ncRNA      | LOC1001316 | NA       | NA                   |
| 16246 | 3 | 188925329 | 188925329 | G | C | G | S    | ncRNA      | LOC1001316 | NA       | NA                   |
| 16246 | 3 | 198885853 | 198885853 | C | A | C | M    | UTR3       | KIAA0226   | NA       | NA                   |
| 16246 | 4 | 2044689   | 2044689   | C | A | C | M    | intronic   | POLN       | NA       | NA                   |
| 16246 | 4 | 46625135  | 46625135  | G | T | G | K    | exonic     | GABRA4     | missense | NM_000809:p.P510H    |
| 16246 | 4 | 62654206  | 62654206  | C | A | C | M    | intergenic | NA         | NA       | NA                   |
| 16246 | 4 | 68647130  | 68647130  | T | C | T | Y    | intronic   | TMPRSS11F  | NA       | NA                   |
| 16246 | 4 | 70650091  | 70650091  | C | A | C | M    | exonic     | SULT1B1    | silent   | NM_014465:p.R104R    |
| 16246 | 4 | 84745004  | 84745004  | T | G | T | K    | UTR3       | AGPAT9     | NA       | NA                   |
| 16246 | 4 | 93323661  | 93323661  | C | A | C | M    | intergenic | NA         | NA       | NA                   |
| 16246 | 4 | 103869283 | 103869283 | C | A | C | M    | intronic   | MANBA      | NA       | NA                   |
| 16246 | 4 | 104730364 | 104730364 | C | A | C | M    | exonic     | TACR3      | missense | NM_001059:p.R441L    |
| 16246 | 4 | 106243910 | 106243910 | G | T | G | K    | intergenic | NA         | NA       | NA                   |
| 16246 | 4 | 119957907 | 119957907 | C | A | C | M    | exonic     | SEC24D     | missense | NM_014822:p.Q119H    |
| 16246 | 4 | 123570238 | 123570238 | C | A | C | M    | exonic     | ADAD1      | missense | NM_001159295:p.S524Y |
| 16246 | 4 | 143455326 | 143455326 | G | T | G | K    | exonic     | INPP4B     | missense | NM_001101669:p.P138T |
| 16246 | 4 | 155726563 | 155726563 | C | A | C | M    | exonic     | FGA        | missense | NM_000508:p.D490Y    |
| 16246 | 4 | 156970464 | 156970464 | C | G | C | S    | exonic     | ACCN5      | missense | NM_017419:p.E504D    |
| 16246 | 4 | 164407140 | 164407140 | A | T | A | W    | intergenic | NA         | NA       | NA                   |
| 16246 | 4 | 171236186 | 171236186 | C | A | C | M    | intronic   | AADAT      | NA       | NA                   |
| 16246 | 4 | 177308239 | 177308239 | G | T | G | K    | exonic     | WDR17      | missense | NM_181265:p.R700I    |
| 16246 | 4 | 189255510 | 189255510 | G | C | G | S    | intronic   | TRIML2     | NA       | NA                   |
| 16246 | 4 | 189508080 | 189508080 | C | A | C | M    | intergenic | NA         | NA       | NA                   |
| 16246 | 4 | 191055191 | 191055191 | A | T | A | W    | intergenic | NA         | NA       | NA                   |
| 16246 | 5 | 5243297   | 5243297   | C | A | C | M    | intronic   | ADAMTS16   | NA       | NA                   |
| 16246 | 5 | 8634363   | 8634363   | C | A | C | M    | intergenic | NA         | NA       | NA                   |
| 16246 | 5 | 14535929  | 14535929  | G | T | G | K    | intronic   | TRIO       | NA       | NA                   |
| 16246 | 5 | 19270026  | 19270026  | T | A | T | W    | intergenic | NA         | NA       | NA                   |
| 16246 | 5 | 21497625  | 21497625  | G | T | G | K    | ncRNA      | GUSBP1     | NA       | NA                   |
| 16246 | 5 | 21787987  | 21787987  | C | A | C | M    | exonic     | CDH12      | missense | NM_004061:p.E667D    |
| 16246 | 5 | 21800777  | 21800777  | G | T | G | K    | intronic   | CDH12      | NA       | NA                   |
| 16246 | 5 | 31352193  | 31352193  | G | T | G | K    | splicing   | CDH6       | missense | NM_004932:p.Q504H    |
| 16246 | 5 | 33495697  | 33495697  | G | T | G | K    | exonic     | TARS       | silent   | NM_152295:p.L408L    |
| 16246 | 5 | 33719744  | 33719744  | A | T | A | W    | exonic     | ADAMTS12   | missense | NM_030955:p.Y270N    |
| 16246 | 5 | 33719953  | 33719953  | T | A | T | W    | intronic   | ADAMTS12   | NA       | NA                   |
| 16246 | 5 | 35120322  | 35120322  | C | A | C | M    | intronic   | PRLR       | NA       | NA                   |
| 16246 | 5 | 38465981  | 38465981  | G | T | G | K    | intronic   | EGFLAM     | NA       | NA                   |
| 16246 | 5 | 42503645  | 42503645  | C | A | C | M    | intronic   | GHR        | NA       | NA                   |

|       |   |           |           |   |   |   |      |            |          |          |                       |
|-------|---|-----------|-----------|---|---|---|------|------------|----------|----------|-----------------------|
| 16246 | 5 | 54678789  | 54678789  | C | G | C | S    | intronic   | SKIV2L2  | NA       | NA                    |
| 16246 | 5 | 71526425  | 71526425  | A | G | A | R    | exonic     | MAP1B    | missense | NM_005909:p.Y496C     |
| 16246 | 5 | 76285626  | 76285626  | G | T | G | K    | exonic     | CRHBP    | silent   | NM_001882:p.L64L      |
| 16246 | 5 | 81341507  | 81341507  | G | T | G | K    | intronic   | ATG10    | NA       | NA                    |
| 16246 | 5 | 82852097  | 82852097  | C | A | C | M    | exonic     | VCAN     | missense | NM_001164098:p.S739Y  |
| 16246 | 5 | 82886472  | 82886472  | T | C | T | Y    | intronic   | VCAN     | NA       | NA                    |
| 16246 | 5 | 110740487 | 110740487 | A | T | A | W    | exonic     | CAMK4    | missense | NM_001744:p.T112S     |
| 16246 | 5 | 114888617 | 114888617 | T | A | T | W    | exonic     | FEM1C    | missense | NM_020177:p.S381C     |
| 16246 | 5 | 117142739 | 117142739 | C | T | C | Y    | intergenic | NA       | NA       | NA                    |
| 16246 | 5 | 130353659 | 130353659 | C | G | C | S    | intergenic | NA       | NA       | NA                    |
| 16246 | 5 | 133899453 | 133899453 | G | T | G | K    | exonic     | PHF15    | nonsense | NM_015288:p.E3X       |
| 16246 | 5 | 140217336 | 140217336 | G | T | G | K    | exonic     | PCDHA10  | missense | NM_018901:p.V507L     |
| 16246 | 5 | 140328836 | 140328836 | G | T | G | K    | exonic     | PCDHAC2  | missense | NM_018899:p.R767S     |
| 16246 | 5 | 140553280 | 140553280 | G | A | G | R    | exonic     | PCDHB10  | missense | NM_018930:p.G324D     |
| 16246 | 5 | 140735796 | 140735796 | C | A | C | M    | exonic     | PCDHGA6  | silent   | NM_018919:p.L654L     |
| 16246 | 5 | 144589711 | 144589711 | G | T | G | K    | intergenic | NA       | NA       | NA                    |
| 16246 | 5 | 156522864 | 156522864 | C | A | C | M    | exonic     | FAM71B   | missense | NM_130899:p.M330I     |
| 16246 | 5 | 156849910 | 156849910 | C | A | C | M    | exonic     | ADAM19   | silent   | NM_033274:p.L742L     |
| 16246 | 5 | 159845055 | 159845055 | G | A | G | R    | downstream | MIR146A  | NA       | NA                    |
| 16246 | 5 | 160906136 | 160906136 | G | C | G | S    | intronic   | GABRB2   | NA       | NA                    |
| 16246 | 5 | 180271123 | 180271123 | G | T | G | K    | exonic     | BTNL8    | missense | NM_001040462:p.E192D  |
| 16246 | 6 | 27344789  | 27344789  | G | T | G | K    | intergenic | NA       | NA       | NA                    |
| 16246 | 6 | 29538519  | 29538519  | C | A | C | M    | UTR3       | OR2H1    | NA       | NA                    |
| 16246 | 6 | 29664097  | 29664097  | A | G | A | R    | exonic     | OR2H2    | missense | NM_007160:p.I133V     |
| 16246 | 6 | 30660032  | 30660032  | G | T | G | K    | exonic     | ABCF1    | missense | NM_001090:p.R358L     |
| 16246 | 6 | 30660033  | 30660033  | G | T | G | K    | exonic     | ABCF1    | silent   | NM_001090:p.R358R     |
| 16246 | 6 | 34116145  | 34116145  | T | A | T | W    | intronic   | GRM4     | NA       | NA                    |
| 16246 | 6 | 36149470  | 36149470  | C | G | C | S    | exonic     | MAPK14   | missense | NM_139012:p.H148D     |
| 16246 | 6 | 36760026  | 36760026  | C | G | C | S    | exonic     | CDKN1A   | missense | NM_000389:p.T57R      |
| 16246 | 6 | 49327033  | 49327033  | G | T | G | K    | intergenic | NA       | NA       | NA                    |
| 16246 | 6 | 49773613  | 49773613  | G | T | G | K    | exonic     | CRISP2   | missense | NM_001142435:p.T145N  |
| 16246 | 6 | 50820724  | 50820724  | A | G | A | R    | intronic   | TFAP2D   | NA       | NA                    |
| 16246 | 6 | 54142373  | 54142373  | C | A | C | M    | intronic   | G6orf142 | NA       | NA                    |
| 16246 | 6 | 54912618  | 54912618  | G | T | G | K    | exonic     | FAM83B   | missense | NM_001010872:p.G297V  |
| 16246 | 6 | 55331760  | 55331760  | G | T | G | K    | exonic     | GFRAL    | missense | NM_207410:p.D273Y     |
| 16246 | 6 | 63961083  | 63961083  | C | A | C | M    | intergenic | NA       | NA       | NA                    |
| 16246 | 6 | 80832010  | 80832010  | C | T | C | Y    | intergenic | NA       | NA       | NA                    |
| 16246 | 6 | 89658351  | 89658351  | G | A | G | R    | exonic     | RNGTT    | silent   | NM_003800:p.G229G     |
| 16246 | 6 | 94123406  | 94123406  | C | A | C | M    | exonic     | EPHA7    | silent   | NM_004440:p.G358G     |
| 16246 | 6 | 99729918  | 99729918  | G | T | G | K    | intergenic | NA       | NA       | NA                    |
| 16246 | 6 | 104572230 | 104572230 | C | A | C | M    | intergenic | NA       | NA       | NA                    |
| 16246 | 6 | 112777996 | 112777996 | G | A | G | R    | exonic     | RFPL4B   | silent   | NM_001013734:p.R131R  |
| 16246 | 6 | 130577347 | 130577347 | C | T | C | Y    | exonic     | SAMD3    | missense | NM_152552:p.A33T      |
| 16246 | 6 | 134040003 | 134040003 | G | - | A | *-/G | intergenic | NA       | NA       | NA                    |
| 16246 | 6 | 139013520 | 139013520 | C | T | C | Y    | intergenic | NA       | NA       | NA                    |
| 16246 | 6 | 144499457 | 144499457 | C | T | C | Y    | intergenic | NA       | NA       | NA                    |
| 16246 | 6 | 155615786 | 155615786 | C | A | C | M    | exonic     | TIAM2    | silent   | NM_001010927:p.R303R  |
| 16246 | 6 | 155802817 | 155802817 | G | T | G | K    | exonic     | NOX3     | silent   | NM_015718:p.I211I     |
| 16246 | 6 | 161080258 | 161080258 | C | A | C | M    | intronic   | PLG      | NA       | NA                    |
| 16246 | 6 | 165631628 | 165631628 | G | - | C | *-/G | intronic   | C6orf118 | NA       | NA                    |
| 16246 | 6 | 167034884 | 167034884 | C | T | C | Y    | intronic   | RPS6KA2  | NA       | NA                    |
| 16246 | 7 | 5063451   | 5063451   | G | T | G | K    | splicing   | RBAK     | NA       | NA                    |
| 16246 | 7 | 43485806  | 43485806  | C | A | C | M    | exonic     | HECW1    | missense | NM_015052:p.L1058I    |
| 16246 | 7 | 44123920  | 44123920  | T | C | T | Y    | intronic   | POLD2    | NA       | NA                    |
| 16246 | 7 | 44246813  | 44246813  | T | C | T | Y    | intronic   | CAMK2B   | NA       | NA                    |
| 16246 | 7 | 47839212  | 47839212  | C | A | C | M    | splicing   | PKD1L1   | NA       | NA                    |
| 16246 | 7 | 57192531  | 57192531  | C | G | C | S    | exonic     | ZNF479   | missense | NM_033273:p.R178T     |
| 16246 | 7 | 63184283  | 63184283  | G | T | G | K    | intergenic | NA       | NA       | NA                    |
| 16246 | 7 | 75280867  | 75280867  | C | A | C | M    | intronic   | CCL24    | NA       | NA                    |
| 16246 | 7 | 81177454  | 81177454  | C | G | C | S    | exonic     | HGF      | missense | NM_000601:p.V496L     |
| 16246 | 7 | 81474930  | 81474930  | C | A | C | M    | splicing   | CACNA2D1 | NA       | NA                    |
| 16246 | 7 | 87118223  | 87118223  | C | A | C | M    | intronic   | ABCB1    | NA       | NA                    |
| 16246 | 7 | 92663108  | 92663108  | A | G | A | R    | exonic     | HEPACAM2 | missense | NM_198151:p.V403A     |
| 16246 | 7 | 101766200 | 101766200 | G | A | G | R    | intergenic | NA       | NA       | NA                    |
| 16246 | 7 | 102994500 | 102994500 | G | T | G | K    | intronic   | RELN     | NA       | NA                    |
| 16246 | 7 | 104570876 | 104570876 | G | A | G | R    | exonic     | SRPK2    | silent   | NM_182692:p.I317I     |
| 16246 | 7 | 114931276 | 114931276 | A | T | A | W    | intergenic | NA       | NA       | NA                    |
| 16246 | 7 | 116159077 | 116159077 | A | G | A | R    | exonic     | MET      | silent   | NM_001127500:p.T440T  |
| 16246 | 7 | 117022434 | 117022434 | T | A | T | W    | intronic   | CFTR     | NA       | NA                    |
| 16246 | 7 | 128274184 | 128274184 | G | T | G | K    | exonic     | FLNC     | missense | NM_001127487:p.R1426L |
| 16246 | 7 | 134911770 | 134911770 | A | T | A | W    | intronic   | NUP205   | NA       | NA                    |
| 16246 | 7 | 136351445 | 136351445 | C | A | C | M    | exonic     | CHRM2    | silent   | NM_001006629:p.I431I  |
| 16246 | 8 | 2059526   | 2059526   | C | A | C | M    | intronic   | MYOM2    | NA       | NA                    |
| 16246 | 8 | 6781625   | 6781625   | A | G | A | R    | intronic   | DEFA4    | NA       | NA                    |
| 16246 | 8 | 6968095   | 6968095   | C | A | C | M    | intergenic | NA       | NA       | NA                    |
| 16246 | 8 | 22221497  | 22221497  | G | T | G | K    | exonic     | PIWIL2   | missense | NM_018068:p.R551L     |
| 16246 | 8 | 41649300  | 41649300  | C | A | C | M    | exonic     | ANK1     | nonsense | NM_000037:p.E1609X    |
| 16246 | 8 | 41909236  | 41909236  | C | A | C | M    | exonic     | MYST3    | missense | NM_001099412:p.G1887C |
| 16246 | 8 | 71674931  | 71674931  | C | A | C | M    | intronic   | TRAM1    | NA       | NA                    |

|       |    |           |           |   |   |   |   |            |            |          |                       |
|-------|----|-----------|-----------|---|---|---|---|------------|------------|----------|-----------------------|
| 16246 | 8  | 73308797  | 73308797  | C | A | C | M | ncRNA      | LOC392232  | NA       | NA                    |
| 16246 | 8  | 87752334  | 87752334  | C | G | C | S | exonic     | CNGB3      | missense | NM_019098:p.K149N     |
| 16246 | 8  | 92239665  | 92239665  | C | T | C | Y | intronic   | LRRC69     | NA       | NA                    |
| 16246 | 8  | 138779556 | 138779556 | G | T | G | K | intergenic | NA         | NA       | NA                    |
| 16246 | 8  | 139279007 | 139279007 | G | C | G | S | exonic     | FAM135B    | missense | NM_015912:p.R253G     |
| 16246 | 8  | 139279008 | 139279008 | G | T | G | K | exonic     | FAM135B    | nonsense | NM_015912:p.Y252X     |
| 16246 | 9  | 15024502  | 15024502  | A | T | A | W | intergenic | NA         | NA       | NA                    |
| 16246 | 9  | 17399373  | 17399373  | G | T | G | K | exonic     | CNTLN      | nonsense | NM_017738:p.G900X     |
| 16246 | 9  | 17447637  | 17447637  | C | T | C | Y | exonic     | CNTLN      | missense | NM_017738:p.P1077L    |
| 16246 | 9  | 34333373  | 34333373  | C | T | C | Y | exonic     | NUDT3      | nonsense | NM_147173:p.Q127X     |
| 16246 | 9  | 35389514  | 35389514  | G | T | G | K | intronic   | UNC13B     | NA       | NA                    |
| 16246 | 9  | 35652529  | 35652529  | G | A | G | R | exonic     | C9orf100   | missense | NM_032818:p.P295S     |
| 16246 | 9  | 67906893  | 67906893  | C | T | C | Y | intergenic | NA         | NA       | NA                    |
| 16246 | 9  | 67907138  | 67907138  | G | A | G | R | intergenic | NA         | NA       | NA                    |
| 16246 | 9  | 67916061  | 67916061  | G | A | G | R | intergenic | NA         | NA       | NA                    |
| 16246 | 9  | 67916151  | 67916151  | C | A | C | M | intergenic | NA         | NA       | NA                    |
| 16246 | 9  | 68322180  | 68322180  | C | G | C | S | intergenic | NA         | NA       | NA                    |
| 16246 | 9  | 70414481  | 70414481  | C | A | C | M | intergenic | NA         | NA       | NA                    |
| 16246 | 9  | 70818178  | 70818178  | G | C | G | S | exonic     | PRKACG     | missense | NM_002732:p.N217K     |
| 16246 | 9  | 105925235 | 105925235 | G | A | G | R | exonic     | SMC2       | missense | NM_001042550:p.E720K  |
| 16246 | 9  | 111745274 | 111745274 | G | T | G | K | exonic     | PALM2      | missense | NM_001037293:p.K296N  |
| 16246 | 9  | 120970102 | 120970102 | A | T | A | W | exonic     | DBC1       | missense | NM_014618:p.L456Q     |
| 16246 | 9  | 124185702 | 124185702 | G | T | G | K | exonic     | PTG51      | missense | NM_080591:p.V286L     |
| 16246 | 9  | 130640260 | 130640260 | T | A | T | W | intronic   | CCBL1      | NA       | NA                    |
| 16246 | 9  | 137785615 | 137785615 | C | T | C | Y | exonic     | KCNT1      | missense | NM_020822:p.P149L     |
| 16246 | 9  | 138827740 | 138827740 | G | T | G | K | intronic   | C9orf86    | NA       | NA                    |
| 16246 | 10 | 5216964   | 5216964   | G | T | G | K | ncRNA      | AKR1CL1    | NA       | NA                    |
| 16246 | 10 | 21169757  | 21169757  | C | A | C | M | exonic     | NEBL       | nonsense | NM_006393:p.E419X     |
| 16246 | 10 | 28269742  | 28269742  | T | A | T | W | splicing   | ARMC4      | NA       | NA                    |
| 16246 | 10 | 28313121  | 28313121  | G | A | G | R | exonic     | ARMC4      | missense | NM_018076:p.S227L     |
| 16246 | 10 | 31024888  | 31024888  | C | A | C | M | intergenic | NA         | NA       | NA                    |
| 16246 | 10 | 37526406  | 37526406  | T | A | T | W | exonic     | ANKRD30A   | nonsense | NM_052997:p.L847X     |
| 16246 | 10 | 38147640  | 38147640  | G | A | G | R | intergenic | NA         | NA       | NA                    |
| 16246 | 10 | 43420723  | 43420723  | C | A | C | M | intergenic | NA         | NA       | NA                    |
| 16246 | 10 | 48002295  | 48002295  | G | T | G | K | intronic   | RBP3       | NA       | NA                    |
| 16246 | 10 | 49985859  | 49985859  | G | T | G | K | exonic     | C10orf72   | silent   | NM_144984:p.L81L      |
| 16246 | 10 | 50489118  | 50489118  | C | A | C | M | exonic     | SLC18A3    | nonsense | NM_003055:p.S109X     |
| 16246 | 10 | 55251824  | 55251824  | C | A | C | M | exonic     | PCDH15     | missense | NM_001142766:p.A1887S |
| 16246 | 10 | 55368593  | 55368593  | C | A | C | M | exonic     | PCDH15     | missense | NM_001142766:p.V1121F |
| 16246 | 10 | 55808484  | 55808484  | C | T | C | Y | intronic   | PCDH15     | NA       | NA                    |
| 16246 | 10 | 62322690  | 62322690  | C | A | C | M | exonic     | RHOBTB1    | missense | NM_014836:p.W122C     |
| 16246 | 10 | 68969392  | 68969392  | G | T | G | K | exonic     | CTNNA3     | missense | NM_013266:p.P112T     |
| 16246 | 10 | 82321273  | 82321273  | G | T | G | K | exonic     | SH2D4B     | missense | NM_001145719:p.A103S  |
| 16246 | 10 | 86141023  | 86141023  | A | G | A | R | intronic   | FAM190B    | NA       | NA                    |
| 16246 | 10 | 96084464  | 96084464  | A | G | A | R | splicing   | NOC3L      | missense | NM_022451:p.S731P     |
| 16246 | 10 | 118218695 | 118218695 | C | G | C | S | exonic     | PNLIPRP3   | missense | NM_001011709:p.C312W  |
| 16246 | 10 | 126681613 | 126681613 | G | A | G | R | exonic     | CTBP2      | silent   | NM_022802:p.T628T     |
| 16246 | 11 | 4781704   | 4781704   | G | T | G | K | exonic     | OR52R1     | silent   | NM_001005177:p.P161P  |
| 16246 | 11 | 5210961   | 5210961   | G | T | G | K | intronic   | HBD        | NA       | NA                    |
| 16246 | 11 | 5549701   | 5549701   | T | G | T | K | intergenic | NA         | NA       | NA                    |
| 16246 | 11 | 6870078   | 6870078   | A | C | A | M | exonic     | OR2D2      | missense | NM_003700:p.I77R      |
| 16246 | 11 | 10741988  | 10741988  | C | T | C | Y | exonic     | CTR9       | nonsense | NM_014633:p.R394X     |
| 16246 | 11 | 11271235  | 11271235  | C | A | C | M | exonic     | GALNTL4    | missense | NM_198516:p.V532L     |
| 16246 | 11 | 12182371  | 12182371  | A | G | A | R | splicing   | MICAL2     | NA       | NA                    |
| 16246 | 11 | 20596091  | 20596091  | A | G | A | R | intronic   | SLC6A5     | NA       | NA                    |
| 16246 | 11 | 22354755  | 22354755  | G | T | G | K | exonic     | SLC17A6    | missense | NM_020346:p.M458I     |
| 16246 | 11 | 35410952  | 35410952  | A | T | A | W | exonic     | PAMR1      | missense | NM_001001991:p.L564Q  |
| 16246 | 11 | 43379548  | 43379548  | G | T | G | K | intronic   | TTC17      | NA       | NA                    |
| 16246 | 11 | 46356600  | 46356600  | G | C | G | S | exonic     | DGKZ       | missense | NM_001199267:p.A797P  |
| 16246 | 11 | 48205543  | 48205543  | C | A | C | M | intergenic | NA         | NA       | NA                    |
| 16246 | 11 | 48442727  | 48442727  | G | T | G | K | intergenic | NA         | NA       | NA                    |
| 16246 | 11 | 49048927  | 49048927  | C | A | C | M | intergenic | NA         | NA       | NA                    |
| 16246 | 11 | 51372124  | 51372124  | C | A | C | M | exonic     | OR4C46     | silent   | NM_001004703:p.A89A   |
| 16246 | 11 | 55175707  | 55175707  | C | A | C | M | exonic     | OR4S2      | missense | NM_001004059:p.P251H  |
| 16246 | 11 | 55814264  | 55814264  | A | T | A | W | exonic     | OR8H1      | missense | NM_001005199:p.L284Q  |
| 16246 | 11 | 58140749  | 58140749  | A | T | A | W | ncRNA      | ZFP91-CNTF | NA       | NA                    |
| 16246 | 11 | 61915584  | 61915584  | G | T | G | K | exonic     | ASRG1      | missense | NM_001083926:p.A209S  |
| 16246 | 11 | 64278355  | 64278355  | G | A | G | R | exonic     | PYGM       | silent   | NM_005609:p.A346A     |
| 16246 | 11 | 73366806  | 73366806  | G | C | G | S | intronic   | UCP2       | NA       | NA                    |
| 16246 | 11 | 75740453  | 75740453  | T | A | T | W | exonic     | PRKRIR     | silent   | NM_004705:p.I463I     |
| 16246 | 11 | 77090162  | 77090162  | T | A | T | W | exonic     | RSF1       | missense | NM_016578:p.K587M     |
| 16246 | 11 | 88775269  | 88775269  | G | A | G | R | exonic     | NOX4       | missense | NM_016931:p.P240L     |
| 16246 | 11 | 92535576  | 92535576  | C | A | C | M | exonic     | SLC36A4    | missense | NM_152313:p.M327I     |
| 16246 | 11 | 114616409 | 114616409 | T | A | T | W | intronic   | CADM1      | NA       | NA                    |
| 16246 | 11 | 116712300 | 116712300 | C | T | C | Y | intronic   | CEP164     | NA       | NA                    |
| 16246 | 11 | 120921193 | 120921193 | G | A | G | R | exonic     | SORL1      | silent   | NM_003105:p.L632L     |
| 16246 | 11 | 122394079 | 122394079 | G | C | G | S | ncRNA      | LOC341056  | NA       | NA                    |
| 16246 | 11 | 123316334 | 123316334 | G | T | G | K | exonic     | OR4D5      | missense | NM_001001965:p.M267I  |
| 16246 | 11 | 123918082 | 123918082 | T | A | T | W | exonic     | OR8B12     | missense | NM_001005195:p.N227Y  |

|       |    |           |           |   |   |   |      |            |            |          |                      |
|-------|----|-----------|-----------|---|---|---|------|------------|------------|----------|----------------------|
| 16246 | 11 | 129335972 | 129335972 | A | T | A | W    | intronic   | PRDM10     | NA       | NA                   |
| 16246 | 12 | 14501435  | 14501435  | G | T | G | K    | exonic     | ATF7IP     | silent   | NM_018179:p.L699L    |
| 16246 | 12 | 14501436  | 14501436  | G | T | G | K    | exonic     | ATF7IP     | nonsense | NM_018179:p.E700X    |
| 16246 | 12 | 14697252  | 14697252  | A | G | A | R    | intronic   | GUCY2C     | NA       | NA                   |
| 16246 | 12 | 18468824  | 18468824  | G | T | G | K    | intronic   | PIK3C2G    | NA       | NA                   |
| 16246 | 12 | 21856355  | 21856355  | T | A | T | W    | exonic     | ABCC9      | missense | NM_020298:p.K1333I   |
| 16246 | 12 | 27720747  | 27720747  | G | T | G | K    | exonic     | PPF1BP1    | silent   | NM_003622:p.R510R    |
| 16246 | 12 | 29532011  | 29532011  | - | A | C | */+A | exonic     | OVCH1      | FS_ins   | NM_183378:p.W258fs   |
| 16246 | 12 | 29532012  | 29532012  | C | A | C | M    | exonic     | OVCH1      | missense | NM_183378:p.W258L    |
| 16246 | 12 | 34210758  | 34210758  | C | A | C | M    | intergenic | NA         | NA       | NA                   |
| 16246 | 12 | 36708789  | 36708789  | G | T | G | K    | intergenic | NA         | NA       | NA                   |
| 16246 | 12 | 45272998  | 45272998  | G | T | G | K    | intergenic | NA         | NA       | NA                   |
| 16246 | 12 | 46821904  | 46821904  | C | G | C | S    | intronic   | PFKM       | NA       | NA                   |
| 16246 | 12 | 65074318  | 65074318  | C | A | C | M    | exonic     | GRIP1      | missense | NM_021150:p.G637V    |
| 16246 | 12 | 65074319  | 65074319  | C | A | C | M    | exonic     | GRIP1      | nonsense | NM_021150:p.G637X    |
| 16246 | 12 | 68357094  | 68357094  | T | A | T | W    | exonic     | BEST3      | missense | NM_032735:p.T246S    |
| 16246 | 12 | 74090573  | 74090573  | C | A | C | M    | exonic     | GLI1PR1L2  | silent   | NM_152436:p.V109V    |
| 16246 | 12 | 75265415  | 75265415  | T | C | T | Y    | exonic     | BBS10      | missense | NM_024685:p.K161E    |
| 16246 | 12 | 93341968  | 93341968  | T | A | T | W    | intronic   | CCDC41     | NA       | NA                   |
| 16246 | 12 | 94901763  | 94901763  | C | A | C | M    | intronic   | HAL        | NA       | NA                   |
| 16246 | 12 | 108714849 | 108714849 | C | G | C | S    | exonic     | TRPV4      | missense | NM_021625:p.M605I    |
| 16246 | 12 | 110503830 | 110503830 | T | C | T | Y    | intronic   | ATXN2      | NA       | NA                   |
| 16246 | 12 | 116203068 | 116203068 | A | G | A | R    | intronic   | NOS1       | NA       | NA                   |
| 16246 | 12 | 119076079 | 119076079 | G | T | G | K    | exonic     | GCN111     | missense | NM_006836:p.A1240D   |
| 16246 | 12 | 123450949 | 123450949 | C | A | C | M    | intronic   | NCOR2      | NA       | NA                   |
| 16246 | 13 | 18169293  | 18169293  | G | T | G | K    | intergenic | NA         | NA       | NA                   |
| 16246 | 13 | 20314974  | 20314974  | T | A | T | W    | intronic   | XPO4       | NA       | NA                   |
| 16246 | 13 | 42464076  | 42464076  | G | - | C | */-G | intronic   | EPST11     | NA       | NA                   |
| 16246 | 13 | 42464078  | 42464078  | G | T | G | K    | intronic   | EPST11     | NA       | NA                   |
| 16246 | 13 | 42832012  | 42832012  | C | A | C | M    | exonic     | ENOX1      | missense | NM_017993:p.M188I    |
| 16246 | 13 | 47839630  | 47839630  | G | T | G | K    | splicing   | RB1        | NA       | NA                   |
| 16246 | 13 | 52317664  | 52317664  | G | C | G | S    | exonic     | PCDH8      | missense | NM_032949:p.F815L    |
| 16246 | 13 | 52880931  | 52880931  | G | T | G | K    | intergenic | NA         | NA       | NA                   |
| 16246 | 13 | 53913438  | 53913438  | T | A | T | W    | intergenic | NA         | NA       | NA                   |
| 16246 | 13 | 57196798  | 57196798  | C | A | C | M    | exonic     | PCDH17     | missense | NM_001040429:p.S950Y |
| 16246 | 13 | 63283658  | 63283658  | C | A | C | M    | intergenic | NA         | NA       | NA                   |
| 16246 | 13 | 67304868  | 67304868  | C | G | C | S    | intergenic | NA         | NA       | NA                   |
| 16246 | 13 | 69366940  | 69366940  | G | C | G | S    | intronic   | KLHL1      | NA       | NA                   |
| 16246 | 13 | 76458189  | 76458189  | C | A | C | M    | intergenic | NA         | NA       | NA                   |
| 16246 | 13 | 76678855  | 76678855  | C | A | C | M    | exonic     | MYCBP2     | nonsense | NM_015057:p.E1175X   |
| 16246 | 13 | 82295373  | 82295373  | G | T | G | K    | intergenic | NA         | NA       | NA                   |
| 16246 | 13 | 92845738  | 92845738  | A | T | A | W    | intronic   | GPC6       | NA       | NA                   |
| 16246 | 13 | 95083590  | 95083590  | A | T | A | W    | intronic   | DZIP1      | NA       | NA                   |
| 16246 | 13 | 111770173 | 111770173 | G | C | G | S    | exonic     | SOX1       | missense | NM_005986:p.R67P     |
| 16246 | 13 | 112931855 | 112931855 | G | T | G | K    | intronic   | CUL4A      | NA       | NA                   |
| 16246 | 13 | 113336326 | 113336326 | G | T | G | K    | exonic     | TFDP1      | missense | NM_007111:p.A199S    |
| 16246 | 14 | 19459043  | 19459043  | G | C | G | S    | exonic     | OR4K5      | missense | NM_001005483:p.M146I |
| 16246 | 14 | 19552605  | 19552605  | C | A | C | M    | exonic     | OR4K14     | missense | NM_001004712:p.L196F |
| 16246 | 14 | 19827727  | 19827727  | C | A | C | M    | exonic     | TTC5       | missense | NM_138376:p.V408F    |
| 16246 | 14 | 21172217  | 21172217  | C | G | C | S    | exonic     | OR10G2     | missense | NM_001005466:p.V208L |
| 16246 | 14 | 21203244  | 21203244  | G | T | G | K    | exonic     | OR4E2      | missense | NM_001001912:p.M36I  |
| 16246 | 14 | 22936724  | 22936724  | G | A | G | R    | intronic   | MYH6       | NA       | NA                   |
| 16246 | 14 | 24806377  | 24806377  | G | - | T | */-G | intergenic | NA         | NA       | NA                   |
| 16246 | 14 | 44427615  | 44427615  | T | A | T | W    | intergenic | NA         | NA       | NA                   |
| 16246 | 14 | 50453309  | 50453309  | G | C | G | S    | intronic   | PYGL       | NA       | NA                   |
| 16246 | 14 | 62958477  | 62958477  | C | A | C | M    | exonic     | PPP2R5E    | missense | NM_006246:p.W148L    |
| 16246 | 14 | 63533554  | 63533554  | T | C | T | Y    | exonic     | SYNE2      | missense | NM_182914:p.L1026T   |
| 16246 | 14 | 72006488  | 72006488  | G | A | G | R    | exonic     | RGS6       | silent   | NM_004296:p.Q160Q    |
| 16246 | 14 | 81199024  | 81199024  | C | A | C | M    | intergenic | NA         | NA       | NA                   |
| 16246 | 14 | 87470917  | 87470917  | T | C | T | Y    | exonic     | GALC       | missense | NM_001201402:p.N631S |
| 16246 | 14 | 88053316  | 88053316  | G | A | G | R    | exonic     | PTPN21     | missense | NM_007039:p.R75C     |
| 16246 | 14 | 91981326  | 91981326  | G | A | G | R    | intronic   | SLC24A4    | NA       | NA                   |
| 16246 | 14 | 93149139  | 93149139  | G | T | G | K    | exonic     | KIAA1409   | missense | NM_020818:p.R1156L   |
| 16246 | 14 | 100512604 | 100512604 | G | T | G | K    | ncRNA      | SNORD114-1 | NA       | NA                   |
| 16246 | 14 | 104810121 | 104810121 | G | A | G | R    | exonic     | BRF1       | missense | NM_001519:p.R141C    |
| 16246 | 15 | 19884458  | 19884458  | C | A | C | M    | exonic     | OR4N4      | missense | NM_001005241:p.L208I |
| 16246 | 15 | 22473165  | 22473165  | C | A | C | M    | exonic     | C15orf2    | missense | NM_018958:p.P353Q    |
| 16246 | 15 | 23002574  | 23002574  | G | T | G | K    | ncRNA      | SNORD115-2 | NA       | NA                   |
| 16246 | 15 | 28912315  | 28912315  | C | A | C | M    | intergenic | NA         | NA       | NA                   |
| 16246 | 15 | 29847440  | 29847440  | T | C | T | Y    | intergenic | NA         | NA       | NA                   |
| 16246 | 15 | 33481131  | 33481131  | T | C | T | Y    | intronic   | ATPBD4     | NA       | NA                   |
| 16246 | 15 | 38086496  | 38086496  | G | T | G | K    | intronic   | EIF2AK4    | NA       | NA                   |
| 16246 | 15 | 41364336  | 41364336  | C | T | C | Y    | exonic     | TGM7       | silent   | NM_052955:p.E324E    |
| 16246 | 15 | 41608887  | 41608887  | C | T | C | Y    | exonic     | MAP1A      | missense | NM_002373:p.R2642W   |
| 16246 | 15 | 43200125  | 43200125  | G | A | G | R    | exonic     | DUOX1      | missense | NM_144565:p.R171C    |
| 16246 | 15 | 47945801  | 47945801  | C | A | C | M    | intronic   | ATP8B4     | NA       | NA                   |
| 16246 | 15 | 48337979  | 48337979  | G | T | G | K    | exonic     | HDC        | missense | NM_002112:p.H78N     |
| 16246 | 15 | 50454813  | 50454813  | C | A | C | M    | exonic     | MYO5A      | missense | NM_001142495:p.A853S |
| 16246 | 15 | 60879761  | 60879761  | G | T | G | K    | intronic   | TLN2       | NA       | NA                   |

|       |    |          |          |   |   |   |      |            |           |          |                      |
|-------|----|----------|----------|---|---|---|------|------------|-----------|----------|----------------------|
| 16246 | 15 | 62018497 | 62018497 | C | A | C | M    | exonic     | DAPK2     | silent   | NM_014326:p.T190T    |
| 16246 | 15 | 67347584 | 67347584 | A | T | A | W    | intronic   | GLCE      | NA       | NA                   |
| 16246 | 15 | 77639548 | 77639548 | G | T | G | K    | intergenic | NA        | NA       | NA                   |
| 16246 | 15 | 82496738 | 82496738 | G | T | G | K    | exonic     | ADAMTSL3  | missense | NM_207517:p.C1655F   |
| 16246 | 15 | 83289436 | 83289436 | G | T | G | K    | UTR3       | SLC28A1   | NA       | NA                   |
| 16246 | 15 | 90470280 | 90470280 | C | A | C | M    | intronic   | SLCO3A1   | NA       | NA                   |
| 16246 | 15 | 97300131 | 97300131 | A | G | A | R    | intronic   | IGF1R     | NA       | NA                   |
| 16246 | 15 | 98620146 | 98620146 | C | A | C | M    | exonic     | ADAMTS17  | missense | NM_139057:p.Q269H    |
| 16246 | 16 | 3681005  | 3681005  | C | A | C | M    | intronic   | TRAP1     | NA       | NA                   |
| 16246 | 16 | 5050415  | 5050415  | C | A | C | M    | exonic     | C16orf89  | missense | NM_152459:p.G128W    |
| 16246 | 16 | 15736765 | 15736765 | C | G | C | S    | exonic     | MYH11     | silent   | NM_022844:p.L1155L   |
| 16246 | 16 | 17142599 | 17142599 | C | A | C | M    | exonic     | XYLT1     | missense | NM_022166:p.R500L    |
| 16246 | 16 | 20956548 | 20956548 | C | T | C | Y    | intronic   | DNAH3     | NA       | NA                   |
| 16246 | 16 | 21597826 | 21597826 | G | C | G | S    | intronic   | OTOA      | NA       | NA                   |
| 16246 | 16 | 23629201 | 23629201 | C | T | C | Y    | intronic   | ERN2      | NA       | NA                   |
| 16246 | 16 | 31280783 | 31280783 | G | T | G | K    | intronic   | ITGAX     | NA       | NA                   |
| 16246 | 16 | 32282309 | 32282309 | C | A | C | M    | intergenic | NA        | NA       | NA                   |
| 16246 | 16 | 32798475 | 32798475 | G | T | G | K    | ncRNA      | SLC6A10P  | NA       | NA                   |
| 16246 | 16 | 33407884 | 33407884 | C | A | C | M    | intergenic | NA        | NA       | NA                   |
| 16246 | 16 | 33853963 | 33853963 | A | G | A | R    | intergenic | NA        | NA       | NA                   |
| 16246 | 16 | 33856643 | 33856643 | C | T | C | Y    | intergenic | NA        | NA       | NA                   |
| 16246 | 16 | 33857854 | 33857854 | G | C | G | S    | intergenic | NA        | NA       | NA                   |
| 16246 | 16 | 33864714 | 33864714 | C | T | C | Y    | intergenic | NA        | NA       | NA                   |
| 16246 | 16 | 34428547 | 34428547 | C | A | C | M    | intergenic | NA        | NA       | NA                   |
| 16246 | 16 | 34481639 | 34481639 | T | A | T | W    | ncRNA      | LOC283914 | NA       | NA                   |
| 16246 | 16 | 46778644 | 46778644 | T | C | T | Y    | exonic     | ABCC11    | missense | NM_032583:p.I968V    |
| 16246 | 16 | 53921810 | 53921810 | G | T | G | K    | UTR3       | IRX6      | NA       | NA                   |
| 16246 | 16 | 63539408 | 63539408 | C | G | C | S    | exonic     | CDH11     | missense | NM_001797:p.D664H    |
| 16246 | 16 | 69139841 | 69139841 | T | C | T | Y    | exonic     | SF3B3     | missense | NM_012426:p.I466T    |
| 16246 | 16 | 79768962 | 79768962 | G | A | G | R    | exonic     | PKD1L2    | silent   | NM_001076780:p.N796N |
| 16246 | 16 | 82681999 | 82681999 | T | A | T | W    | exonic     | MBTPS1    | missense | NM_003791:p.N338I    |
| 16246 | 16 | 84370919 | 84370919 | T | A | T | W    | exonic     | COX4NB    | missense | NM_006067:p.S177C    |
| 16246 | 17 | 4980989  | 4980989  | C | A | C | M    | intronic   | USP6      | NA       | NA                   |
| 16246 | 17 | 10253130 | 10253130 | G | T | G | K    | intronic   | MYH8      | NA       | NA                   |
| 16246 | 17 | 17059275 | 17059275 | T | G | T | K    | exonic     | FLCN      | missense | NM_144997:p.S461R    |
| 16246 | 17 | 21253241 | 21253241 | C | T | C | Y    | intronic   | KCNJ12    | NA       | NA                   |
| 16246 | 17 | 25904783 | 25904783 | C | T | C | Y    | intergenic | NA        | NA       | NA                   |
| 16246 | 17 | 27373487 | 27373487 | G | T | G | K    | exonic     | LRRC37B   | missense | NM_052888:p.K403N    |
| 16246 | 17 | 30714797 | 30714797 | C | G | C | S    | exonic     | SLFN11    | missense | NM_001104588:p.R48P  |
| 16246 | 17 | 31206762 | 31206762 | G | T | G | K    | intronic   | C17orf66  | NA       | NA                   |
| 16246 | 17 | 36977527 | 36977527 | C | A | C | M    | splicing   | KRT9      | nonsense | NM_000226:p.E466X    |
| 16246 | 17 | 44064920 | 44064920 | C | G | C | S    | ncRNA      | MIR196A1  | NA       | NA                   |
| 16246 | 17 | 50983867 | 50983867 | C | T | C | Y    | intergenic | NA        | NA       | NA                   |
| 16246 | 17 | 52290943 | 52290943 | A | G | A | R    | intronic   | DGKE      | NA       | NA                   |
| 16246 | 17 | 52689481 | 52689481 | G | T | G | K    | exonic     | MSI2      | missense | NM_138962:p.S29I     |
| 16246 | 17 | 53588105 | 53588105 | C | A | C | M    | exonic     | OR4D1     | missense | NM_012374:p.L198I    |
| 16246 | 17 | 58191092 | 58191092 | C | A | C | M    | exonic     | 10-Mar    | missense | NM_152598:p.S73I     |
| 16246 | 17 | 58925040 | 58925040 | G | T | G | K    | exonic     | ACE       | missense | NM_000789:p.K1054N   |
| 16246 | 18 | 8366398  | 8366398  | A | G | A | R    | intronic   | PTPRM     | NA       | NA                   |
| 16246 | 18 | 11743787 | 11743787 | A | G | A | R    | intronic   | GNAL      | NA       | NA                   |
| 16246 | 18 | 23253239 | 23253239 | C | A | C | M    | intergenic | NA        | NA       | NA                   |
| 16246 | 18 | 41803200 | 41803200 | C | T | C | Y    | intergenic | NA        | NA       | NA                   |
| 16246 | 18 | 41849849 | 41849849 | A | T | A | W    | intronic   | PSTPIP2   | NA       | NA                   |
| 16246 | 18 | 46056195 | 46056195 | C | A | C | M    | intronic   | MBD1      | NA       | NA                   |
| 16246 | 18 | 62362396 | 62362396 | C | A | C | M    | exonic     | CDH19     | missense | NM_021153:p.V336F    |
| 16246 | 19 | 1002419  | 1002419  | C | T | C | Y    | intronic   | ABCA7     | NA       | NA                   |
| 16246 | 19 | 2071963  | 2071963  | G | A | G | R    | exonic     | AP3D1     | missense | NM_003938:p.S460F    |
| 16246 | 19 | 4393181  | 4393181  | G | T | G | K    | intronic   | CHAF1A    | NA       | NA                   |
| 16246 | 19 | 45097772 | 45097772 | G | C | G | S    | exonic     | FCGBP     | missense | NM_003890:p.S1638R   |
| 16246 | 19 | 54227439 | 54227439 | C | T | C | Y    | intronic   | CGB2      | NA       | NA                   |
| 16246 | 19 | 59338614 | 59338614 | T | C | T | Y    | intronic   | CNOT3     | NA       | NA                   |
| 16246 | 19 | 59338623 | 59338623 | G | T | G | K    | intronic   | CNOT3     | NA       | NA                   |
| 16246 | 19 | 59558641 | 59558641 | C | A | C | M    | UTR3       | LAIR1     | NA       | NA                   |
| 16246 | 19 | 59900077 | 59900077 | A | T | A | W    | intergenic | NA        | NA       | NA                   |
| 16246 | 19 | 59900078 | 59900078 | G | T | G | K    | intergenic | NA        | NA       | NA                   |
| 16246 | 19 | 59904214 | 59904214 | T | A | T | W    | intergenic | NA        | NA       | NA                   |
| 16246 | 19 | 59955536 | 59955536 | G | A | G | R    | intronic   | KIR2DL3   | NA       | NA                   |
| 16246 | 19 | 60739402 | 60739402 | - | A | C | */+A | exonic     | SBK2      | FS_ins   | NM_001101401:p.L24fs |
| 16246 | 19 | 60919863 | 60919863 | C | G | C | S    | intronic   | NLRP9     | NA       | NA                   |
| 16246 | 19 | 62716231 | 62716231 | G | T | G | K    | intergenic | NA        | NA       | NA                   |
| 16246 | 20 | 2325273  | 2325273  | C | A | C | M    | intronic   | TGM6      | NA       | NA                   |
| 16246 | 20 | 3625725  | 3625725  | C | A | C | M    | intronic   | SIGLEC1   | NA       | NA                   |
| 16246 | 20 | 9365809  | 9365809  | A | T | A | W    | intronic   | PLCB4     | NA       | NA                   |
| 16246 | 20 | 13788008 | 13788008 | G | T | G | K    | exonic     | SEL1L2    | missense | NM_025229:p.T573K    |
| 16246 | 20 | 17410614 | 17410614 | G | T | G | K    | exonic     | PCSK2     | missense | NM_002594:p.D606Y    |
| 16246 | 20 | 28210713 | 28210713 | T | C | T | Y    | intergenic | NA        | NA       | NA                   |
| 16246 | 20 | 39420705 | 39420705 | G | T | G | K    | intronic   | LPIN3     | NA       | NA                   |
| 16246 | 20 | 40166601 | 40166601 | C | G | C | S    | intronic   | PTPRT     | NA       | NA                   |
| 16246 | 20 | 47563101 | 47563101 | G | T | G | K    | exonic     | PTGIS     | missense | NM_000961:p.L377M    |

|       |    |           |           |   |   |   |      |            |             |          |                      |
|-------|----|-----------|-----------|---|---|---|------|------------|-------------|----------|----------------------|
| 16246 | 20 | 57032325  | 57032325  | C | G | C | S    | exonic     | TUBB1       | missense | NM_030773:p.L150V    |
| 16246 | 20 | 57199503  | 57199503  | C | A | C | M    | exonic     | ZNF831      | missense | NM_178457:p.P12T     |
| 16246 | 21 | 10131183  | 10131183  | C | T | C | Y    | intergenic | NA          | NA       | NA                   |
| 16246 | 21 | 31747323  | 31747323  | T | A | T | W    | intronic   | TIAM1       | NA       | NA                   |
| 16246 | 21 | 46376727  | 46376727  | C | A | C | M    | exonic     | COL6A2      | missense | NM_001849:p.R965S    |
| 16246 | 22 | 23226222  | 23226222  | C | A | C | M    | exonic     | UPB1        | silent   | NM_016327:p.P84P     |
| 16246 | 22 | 23438376  | 23438376  | G | C | G | S    | intergenic | NA          | NA       | NA                   |
| 16246 | 22 | 29839088  | 29839088  | C | A | C | M    | intergenic | NA          | NA       | NA                   |
| 16246 | 22 | 30875729  | 30875729  | T | C | T | Y    | intronic   | C22orf42    | NA       | NA                   |
| 16246 | 22 | 35810405  | 35810405  | C | A | C | M    | intronic   | TMPRSS6     | NA       | NA                   |
| 16246 | 22 | 38546947  | 38546947  | C | T | C | Y    | exonic     | ENTHD1      | missense | NM_152512:p.A277T    |
| 16246 | X  | 22042611  | 22042611  | G | C | G | S    | exonic     | PHEX        | missense | NM_000444:p.D430H    |
| 16246 | X  | 22364140  | 22364140  | G | T | G | K    | intergenic | NA          | NA       | NA                   |
| 16246 | X  | 26122958  | 26122958  | G | T | G | K    | exonic     | MAGEB6      | silent   | NM_173523:p.L358L    |
| 16246 | X  | 26432695  | 26432695  | G | T | G | K    | intergenic | NA          | NA       | NA                   |
| 16246 | X  | 31406308  | 31406308  | A | T | A | W    | exonic     | DMD         | missense | NM_004020:p.W465R    |
| 16246 | X  | 38549701  | 38549701  | G | A | G | R    | UTR3       | MID1P1      | NA       | NA                   |
| 16246 | X  | 48431815  | 48431815  | C | T | C | Y    | intronic   | WAS         | NA       | NA                   |
| 16246 | X  | 50072283  | 50072283  | C | G | C | S    | exonic     | CCNB3       | missense | NM_033031:p.P1112A   |
| 16246 | X  | 53260806  | 53260806  | T | A | T | W    | intronic   | KDM5C       | NA       | NA                   |
| 16246 | X  | 57720638  | 57720638  | G | C | G | S    | intergenic | NA          | NA       | NA                   |
| 16246 | X  | 65752537  | 65752537  | G | T | G | K    | exonic     | EDA2R       | silent   | NM_021783:p.T17T     |
| 16246 | X  | 68666254  | 68666254  | G | T | G | K    | exonic     | FAM155B     | missense | NM_015686:p.Q383H    |
| 16246 | X  | 70247406  | 70247406  | C | A | C | M    | intronic   | IL2RG       | NA       | NA                   |
| 16246 | X  | 78466550  | 78466550  | G | T | G | K    | intergenic | NA          | NA       | NA                   |
| 16246 | X  | 78504837  | 78504837  | G | T | G | K    | exonic     | ITM2A       | missense | NM_001171581:p.T106N |
| 16246 | X  | 79715162  | 79715162  | C | A | C | M    | intergenic | NA          | NA       | NA                   |
| 16246 | X  | 83897538  | 83897538  | G | T | G | K    | intergenic | NA          | NA       | NA                   |
| 16246 | X  | 86773997  | 86773997  | G | T | G | K    | exonic     | KLHL4       | missense | NM_019117:p.G486C    |
| 16246 | X  | 91019650  | 91019650  | G | T | G | K    | exonic     | PCDH11X     | missense | NM_032969:p.R585S    |
| 16246 | X  | 91760002  | 91760002  | G | T | G | K    | exonic     | PCDH11X     | missense | NM_032969:p.A1141S   |
| 16246 | X  | 91818356  | 91818356  | G | T | G | K    | intergenic | NA          | NA       | NA                   |
| 16246 | X  | 101704890 | 101704890 | A | G | A | R    | ncRNA      | NXF4        | NA       | NA                   |
| 16246 | X  | 107344186 | 107344186 | - | A | G | */+A | intronic   | COL4A6      | NA       | NA                   |
| 16246 | X  | 107864602 | 107864602 | G | T | G | K    | exonic     | IRS4        | missense | NM_003604:p.N543K    |
| 16246 | X  | 108583482 | 108583482 | C | A | C | M    | exonic     | GUCY2F      | missense | NM_001522:p.R432L    |
| 16246 | X  | 133234321 | 133234321 | G | T | G | K    | intergenic | NA          | NA       | NA                   |
| 16246 | X  | 134571539 | 134571539 | A | T | A | W    | intergenic | NA          | NA       | NA                   |
| 16246 | X  | 134573156 | 134573156 | T | C | T | Y    | intergenic | NA          | NA       | NA                   |
| 16246 | X  | 135326312 | 135326312 | C | A | C | M    | exonic     | GPR112      | missense | NM_153834:p.P3080H   |
| 16246 | X  | 139414783 | 139414783 | G | T | G | K    | exonic     | SOX3        | missense | NM_005634:p.H37N     |
| 16246 | X  | 140796248 | 140796248 | C | G | C | S    | intronic   | MAGEC3      | NA       | NA                   |
| 16246 | X  | 145509434 | 145509434 | C | G | C | S    | intergenic | NA          | NA       | NA                   |
| 16246 | X  | 146078826 | 146078826 | C | A | C | M    | intergenic | NA          | NA       | NA                   |
| 16246 | X  | 152622612 | 152622612 | T | C | T | Y    | exonic     | BCAP31      | missense | NM_001139457:p.K225R |
| 16246 | Y  | 10597387  | 10597387  | - | T | C | */+T | intergenic | NA          | NA       | NA                   |
| 16246 | Y  | 11726414  | 11726414  | C | T | C | Y    | intergenic | NA          | NA       | NA                   |
| 16246 | Y  | 11770913  | 11770913  | G | T | G | K    | intergenic | NA          | NA       | NA                   |
| 16246 | Y  | 11770915  | 11770915  | C | A | C | M    | intergenic | NA          | NA       | NA                   |
| 16246 | Y  | 57392476  | 57392476  | G | A | G | R    | intergenic | NA          | NA       | NA                   |
| 16246 | M  | 9622      | 9622      | G | C | G | S    | intergenic | NA          | NA       | NA                   |
| 16461 | 1  | 1225335   | 1225335   | C | A | C | M    | intronic   | ACAP3       | NA       | NA                   |
| 16461 | 1  | 6114216   | 6114216   | A | T | A | W    | intronic   | CHD5        | NA       | NA                   |
| 16461 | 1  | 7756105   | 7756105   | G | C | G | S    | exonic     | VAMP3       | missense | NM_004781:p.A7P      |
| 16461 | 1  | 9723947   | 9723947   | C | T | C | Y    | intronic   | CLSTN1      | NA       | NA                   |
| 16461 | 1  | 11777149  | 11777149  | C | T | C | Y    | exonic     | MTHFR       | silent   | NM_005957:p.L400L    |
| 16461 | 1  | 12339107  | 12339107  | G | T | G | K    | exonic     | VPS13D      | nonsense | NM_018156:p.E3288X   |
| 16461 | 1  | 12822803  | 12822803  | C | A | C | M    | intergenic | NA          | NA       | NA                   |
| 16461 | 1  | 16134669  | 16134669  | C | A | C | M    | exonic     | SPEN        | missense | NM_015001:p.A3116E   |
| 16461 | 1  | 17822164  | 17822164  | C | T | C | Y    | exonic     | ARHGEF10L   | silent   | NM_001011722:p.I330I |
| 16461 | 1  | 23641615  | 23641615  | C | A | C | M    | exonic     | ASAP3       | missense | NM_001143778:p.R175I |
| 16461 | 1  | 31513426  | 31513426  | C | A | C | M    | intronic   | SNRNP40     | NA       | NA                   |
| 16461 | 1  | 32616203  | 32616203  | C | A | C | M    | exonic     | BSDC1       | missense | NM_018045:p.A211S    |
| 16461 | 1  | 33771372  | 33771372  | C | A | C | M    | exonic     | CSMD2       | missense | NM_052896:p.G3202W   |
| 16461 | 1  | 35625825  | 35625825  | A | G | A | R    | intronic   | ZMYM4       | NA       | NA                   |
| 16461 | 1  | 40549796  | 40549796  | C | - | T | */-C | exonic     | COL9A2      | FS_del   | NM_001852:p.G161fs   |
| 16461 | 1  | 42279233  | 42279233  | A | G | A | R    | intergenic | NA          | NA       | NA                   |
| 16461 | 1  | 42279847  | 42279847  | G | C | G | S    | intergenic | NA          | NA       | NA                   |
| 16461 | 1  | 44194878  | 44194878  | T | C | T | Y    | exonic     | IPO13       | missense | NM_014652:p.M341T    |
| 16461 | 1  | 57171803  | 57171803  | G | T | G | K    | intronic   | C8B         | NA       | NA                   |
| 16461 | 1  | 64416573  | 64416573  | G | A | G | R    | exonic     | ROR1        | missense | NM_005012:p.S754N    |
| 16461 | 1  | 65006966  | 65006966  | T | A | T | W    | exonic     | RAVER2      | missense | NM_018211:p.C97S     |
| 16461 | 1  | 65117298  | 65117298  | C | G | C | S    | exonic     | JAK1        | missense | NM_002227:p.M109I    |
| 16461 | 1  | 65803854  | 65803854  | C | A | C | M    | exonic     | LEPR        | missense | NM_001198689:p.F6L   |
| 16461 | 1  | 70277699  | 70277699  | C | A | C | M    | exonic     | LRRC7       | missense | NM_020794:p.Q1164K   |
| 16461 | 1  | 70501138  | 70501138  | G | A | G | R    | intronic   | ANKRD13C    | NA       | NA                   |
| 16461 | 1  | 74606160  | 74606160  | T | C | T | Y    | intronic   | FPGT-TNNI3I | NA       | NA                   |
| 16461 | 1  | 77433556  | 77433556  | G | C | G | S    | intronic   | PIGK        | NA       | NA                   |
| 16461 | 1  | 78181025  | 78181025  | G | C | G | S    | exonic     | NEXN        | missense | NM_144573:p.E651Q    |

|       |   |           |           |   |   |   |      |            |           |          |                      |
|-------|---|-----------|-----------|---|---|---|------|------------|-----------|----------|----------------------|
| 16461 | 1 | 80331101  | 80331101  | C | A | C | M    | intergenic | NA        | NA       | NA                   |
| 16461 | 1 | 82210202  | 82210202  | C | T | C | Y    | intronic   | LPHN2     | NA       | NA                   |
| 16461 | 1 | 84420489  | 84420489  | G | C | G | S    | exonic     | PRKACB    | missense | NM_207578:p.D43H     |
| 16461 | 1 | 86804031  | 86804031  | C | A | C | M    | ncRNA      | CLCA4     | NA       | NA                   |
| 16461 | 1 | 89298578  | 89298578  | T | C | T | Y    | exonic     | GBP1      | missense | NM_002053:p.T70A     |
| 16461 | 1 | 91773268  | 91773268  | A | G | A | R    | intergenic | NA        | NA       | NA                   |
| 16461 | 1 | 93584768  | 93584768  | G | A | G | R    | UTR5       | DR1       | NA       | NA                   |
| 16461 | 1 | 94727826  | 94727826  | T | C | T | Y    | intronic   | ABCD3     | NA       | NA                   |
| 16461 | 1 | 99160143  | 99160143  | G | T | G | K    | exonic     | LPPR5     | nonsense | NM_001010861:p.C227X |
| 16461 | 1 | 100364142 | 100364142 | C | G | C | S    | intronic   | SASS6     | NA       | NA                   |
| 16461 | 1 | 100444422 | 100444422 | T | C | T | Y    | exonic     | DBT       | silent   | NM_001918:p.P411P    |
| 16461 | 1 | 109972690 | 109972690 | C | T | C | Y    | intronic   | AMPD2     | NA       | NA                   |
| 16461 | 1 | 119887111 | 119887111 | G | T | G | K    | intergenic | NA        | NA       | NA                   |
| 16461 | 1 | 144962883 | 144962883 | C | A | C | M    | ncRNA      | LOC728989 | NA       | NA                   |
| 16461 | 1 | 144969114 | 144969114 | G | T | G | K    | ncRNA      | LOC728989 | NA       | NA                   |
| 16461 | 1 | 148187543 | 148187543 | T | A | T | W    | exonic     | OTUD7B    | missense | NM_020205:p.K397M    |
| 16461 | 1 | 148902670 | 148902670 | C | A | C | M    | intronic   | GOLPH3L   | NA       | NA                   |
| 16461 | 1 | 149640782 | 149640782 | A | G | A | R    | intronic   | PSMB4     | NA       | NA                   |
| 16461 | 1 | 149662617 | 149662617 | C | G | C | S    | exonic     | POGZ      | missense | NM_001194938:p.D458H |
| 16461 | 1 | 150903301 | 150903301 | C | G | C | S    | exonic     | LCE2D     | missense | NM_178430:p.C32W     |
| 16461 | 1 | 151932185 | 151932185 | C | T | C | Y    | intronic   | NPR1      | NA       | NA                   |
| 16461 | 1 | 153433689 | 153433689 | G | C | G | S    | intronic   | THBS3     | NA       | NA                   |
| 16461 | 1 | 155079732 | 155079732 | A | T | A | W    | intronic   | INSRR     | NA       | NA                   |
| 16461 | 1 | 155088644 | 155088644 | C | T | C | Y    | intronic   | INSRR     | NA       | NA                   |
| 16461 | 1 | 156413724 | 156413724 | T | C | T | Y    | intergenic | NA        | NA       | NA                   |
| 16461 | 1 | 156418740 | 156418740 | T | A | T | W    | intronic   | CD1D      | NA       | NA                   |
| 16461 | 1 | 156494297 | 156494297 | T | A | T | W    | UTR3       | CD1A      | NA       | NA                   |
| 16461 | 1 | 156527318 | 156527318 | C | G | C | S    | intronic   | CD1C      | NA       | NA                   |
| 16461 | 1 | 156854208 | 156854208 | G | T | G | K    | intronic   | SPTA1     | NA       | NA                   |
| 16461 | 1 | 156936697 | 156936697 | C | A | C | M    | exonic     | OR6K2     | missense | NM_001005279:p.A124S |
| 16461 | 1 | 158370999 | 158370999 | C | A | C | M    | exonic     | ATP1A2    | silent   | NM_000702:p.A643A    |
| 16461 | 1 | 158723114 | 158723114 | C | T | C | Y    | UTR3       | SLAMF6    | NA       | NA                   |
| 16461 | 1 | 163887970 | 163887970 | A | G | A | R    | intronic   | MGST3     | NA       | NA                   |
| 16461 | 1 | 166779625 | 166779625 | A | G | A | R    | intronic   | XCL2      | NA       | NA                   |
| 16461 | 1 | 167750274 | 167750274 | G | T | G | K    | exonic     | F5        | missense | NM_000130:p.F2192L   |
| 16461 | 1 | 175265395 | 175265395 | C | A | C | M    | exonic     | ASTN1     | missense | NM_207108:p.R373I    |
| 16461 | 1 | 180812038 | 180812038 | T | A | T | W    | exonic     | RNASEL    | missense | NM_021133:p.H672L    |
| 16461 | 1 | 181188553 | 181188553 | A | T | A | W    | exonic     | SHCBP1L   | silent   | NM_030933:p.R113R    |
| 16461 | 1 | 181339370 | 181339370 | G | T | G | K    | exonic     | LAMC1     | missense | NM_002293:p.D235Y    |
| 16461 | 1 | 181763743 | 181763743 | G | T | G | K    | exonic     | SMG7      | nonsense | NM_173156:p.E172X    |
| 16461 | 1 | 191229656 | 191229656 | C | A | C | M    | intergenic | NA        | NA       | NA                   |
| 16461 | 1 | 194494218 | 194494218 | C | A | C | M    | exonic     | KCNT2     | missense | NM_198503:p.W980C    |
| 16461 | 1 | 195665224 | 195665224 | G | T | G | K    | exonic     | CRB1      | missense | NM_001193640:p.G788V |
| 16461 | 1 | 196499993 | 196499993 | G | T | G | K    | intronic   | NEK7      | NA       | NA                   |
| 16461 | 1 | 198112808 | 198112808 | C | G | C | S    | intergenic | NA        | NA       | NA                   |
| 16461 | 1 | 198851269 | 198851269 | T | C | T | Y    | exonic     | KIF14     | missense | NM_014875:p.I402V    |
| 16461 | 1 | 198853747 | 198853747 | T | A | T | W    | exonic     | KIF14     | missense | NM_014875:p.K243M    |
| 16461 | 1 | 200106381 | 200106381 | A | C | A | M    | exonic     | IPO9      | missense | NM_018085:p.Q727H    |
| 16461 | 1 | 200214454 | 200214454 | A | T | A | W    | intergenic | NA        | NA       | NA                   |
| 16461 | 1 | 201012799 | 201012799 | G | A | G | R    | exonic     | KDM5B     | missense | NM_006618:p.T84M     |
| 16461 | 1 | 206279563 | 206279563 | G | - | C | */-G | intronic   | PLXNA2    | NA       | NA                   |
| 16461 | 1 | 212237508 | 212237508 | A | G | A | R    | exonic     | PROX1     | missense | NM_002763:p.H336R    |
| 16461 | 1 | 214318104 | 214318104 | C | A | C | M    | exonic     | USH2A     | missense | NM_206933:p.G1841V   |
| 16461 | 1 | 216674263 | 216674263 | A | G | A | R    | intronic   | TGFB2     | NA       | NA                   |
| 16461 | 1 | 216674282 | 216674282 | C | T | C | Y    | intronic   | TGFB2     | NA       | NA                   |
| 16461 | 1 | 228405582 | 228405582 | C | G | C | S    | exonic     | GALNT2    | nonsense | NM_004481:p.Y99X     |
| 16461 | 1 | 233449801 | 233449801 | C | G | C | S    | exonic     | ARID4B    | missense | NM_016374:p.D505H    |
| 16461 | 1 | 233449921 | 233449921 | G | C | G | S    | intronic   | ARID4B    | NA       | NA                   |
| 16461 | 1 | 234713460 | 234713460 | G | C | G | S    | UTR3       | EDARADD   | NA       | NA                   |
| 16461 | 1 | 238437681 | 238437681 | C | A | C | M    | exonic     | FMN2      | silent   | NM_020066:p.P982P    |
| 16461 | 1 | 239098706 | 239098706 | G | T | G | K    | exonic     | RGS7      | missense | NM_002924:p.Q174K    |
| 16461 | 1 | 240228992 | 240228992 | A | T | A | W    | UTR5       | MAP1LC3C  | NA       | NA                   |
| 16461 | 1 | 240354638 | 240354638 | G | T | G | K    | intronic   | PLD5      | NA       | NA                   |
| 16461 | 1 | 241497245 | 241497245 | G | T | G | K    | intronic   | SDCCAG8   | NA       | NA                   |
| 16461 | 1 | 245125766 | 245125766 | T | A | T | W    | exonic     | AHCTF1    | missense | NM_015446:p.T579S    |
| 16461 | 1 | 245902419 | 245902419 | G | A | G | R    | exonic     | OR13G1    | missense | NM_001005487:p.A183V |
| 16461 | 1 | 246233114 | 246233114 | C | G | C | S    | intronic   | OR2L13    | NA       | NA                   |
| 16461 | 2 | 1478759   | 1478759   | T | C | T | Y    | intronic   | TPO       | NA       | NA                   |
| 16461 | 2 | 6241702   | 6241702   | G | A | G | R    | intergenic | NA        | NA       | NA                   |
| 16461 | 2 | 8921771   | 8921771   | C | A | C | M    | exonic     | MBOAT2    | missense | NM_138799:p.Q344H    |
| 16461 | 2 | 9336847   | 9336847   | C | T | C | Y    | intronic   | ASAP2     | NA       | NA                   |
| 16461 | 2 | 9493915   | 9493915   | G | T | G | K    | exonic     | CPSF3     | missense | NM_016207:p.R245M    |
| 16461 | 2 | 9645737   | 9645737   | C | A | C | M    | intronic   | YWHAQ     | NA       | NA                   |
| 16461 | 2 | 10184640  | 10184640  | C | T | C | Y    | intronic   | RRM2      | NA       | NA                   |
| 16461 | 2 | 11251832  | 11251832  | C | A | C | M    | splicing   | ROCK2     | NA       | NA                   |
| 16461 | 2 | 24768094  | 24768094  | G | A | G | R    | intronic   | NCOA1     | NA       | NA                   |
| 16461 | 2 | 25157373  | 25157373  | G | C | G | S    | intronic   | EFR3B     | NA       | NA                   |
| 16461 | 2 | 25887083  | 25887083  | T | C | T | Y    | intronic   | ASXL2     | NA       | NA                   |
| 16461 | 2 | 27277670  | 27277670  | G | A | G | R    | ncRNA      | SLC5A6    | NA       | NA                   |



|       |   |           |           |   |   |   |      |            |           |          |                       |
|-------|---|-----------|-----------|---|---|---|------|------------|-----------|----------|-----------------------|
| 16461 | 2 | 31032074  | 31032074  | C | T | C | Y    | exonic     | GALNT14   | missense | NM_024572:p.A190T     |
| 16461 | 2 | 36796962  | 36796962  | G | T | G | K    | intronic   | VIT       | NA       | NA                    |
| 16461 | 2 | 39746692  | 39746692  | C | A | C | M    | exonic     | TMEM178   | missense | NM_152390:p.A25D      |
| 16461 | 2 | 46986293  | 46986293  | T | A | T | W    | intronic   | MCFD2     | NA       | NA                    |
| 16461 | 2 | 53889047  | 53889047  | G | C | G | S    | exonic     | ERLEC1    | missense | NM_001127397:p.L329F  |
| 16461 | 2 | 66900847  | 66900847  | C | A | C | M    | intergenic | NA        | NA       | NA                    |
| 16461 | 2 | 71606838  | 71606838  | G | A | G | R    | intronic   | DYSF      | NA       | NA                    |
| 16461 | 2 | 71759850  | 71759850  | G | C | G | S    | exonic     | DYSF      | missense | NM_001130987:p.E2014Q |
| 16461 | 2 | 74695828  | 74695828  | G | T | G | K    | intronic   | C2orf65   | NA       | NA                    |
| 16461 | 2 | 85425040  | 85425040  | C | A | C | M    | intronic   | RETSAT    | NA       | NA                    |
| 16461 | 2 | 85677330  | 85677330  | C | T | C | Y    | intronic   | RNF181    | NA       | NA                    |
| 16461 | 2 | 86685770  | 86685770  | T | C | T | Y    | exonic     | RNF103    | missense | NM_005667:p.I255M     |
| 16461 | 2 | 87263722  | 87263722  | G | T | G | K    | intergenic | NA        | NA       | NA                    |
| 16461 | 2 | 88206980  | 88206980  | G | C | G | S    | exonic     | FABP1     | missense | NM_001443:p.L24V      |
| 16461 | 2 | 88846717  | 88846717  | A | T | A | W    | ncRNA      | ANKRD36BP | NA       | NA                    |
| 16461 | 2 | 90960180  | 90960180  | T | A | T | W    | intergenic | NA        | NA       | NA                    |
| 16461 | 2 | 90961414  | 90961414  | G | C | G | S    | intergenic | NA        | NA       | NA                    |
| 16461 | 2 | 90975295  | 90975295  | A | G | A | R    | intergenic | NA        | NA       | NA                    |
| 16461 | 2 | 91672897  | 91672897  | G | C | G | S    | intergenic | NA        | NA       | NA                    |
| 16461 | 2 | 95210770  | 95210770  | G | T | G | K    | exonic     | ZNF2      | missense | NM_021088:p.R157L     |
| 16461 | 2 | 97010794  | 97010794  | C | G | C | S    | intronic   | FAM178B   | NA       | NA                    |
| 16461 | 2 | 99990278  | 99990278  | G | T | G | K    | exonic     | AFF3      | missense | NM_001025108:p.T109N  |
| 16461 | 2 | 99994444  | 99994444  | C | T | C | Y    | exonic     | AFF3      | silent   | NM_001025108:p.Q25Q   |
| 16461 | 2 | 102171987 | 102171987 | T | C | T | Y    | exonic     | IL1RL2    | silent   | NM_003854:p.F26F      |
| 16461 | 2 | 102394834 | 102394834 | C | A | C | M    | intergenic | NA        | NA       | NA                    |
| 16461 | 2 | 104839461 | 104839461 | T | A | T | W    | exonic     | POU3F3    | missense | NM_006236:p.V354E     |
| 16461 | 2 | 104839774 | 104839774 | C | A | C | M    | exonic     | POU3F3    | silent   | NM_006236:p.R458R     |
| 16461 | 2 | 110553031 | 110553031 | C | A | C | M    | intergenic | NA        | NA       | NA                    |
| 16461 | 2 | 116201987 | 116201987 | G | T | G | K    | intronic   | DPP10     | NA       | NA                    |
| 16461 | 2 | 116227290 | 116227290 | C | A | C | M    | exonic     | DPP10     | missense | NM_001004360:p.Q334K  |
| 16461 | 2 | 118303075 | 118303075 | G | T | G | K    | intronic   | DDX18     | NA       | NA                    |
| 16461 | 2 | 127977633 | 127977633 | A | G | A | R    | intronic   | IWS1      | NA       | NA                    |
| 16461 | 2 | 127978729 | 127978729 | C | G | C | S    | splicing   | IWS1      | NA       | NA                    |
| 16461 | 2 | 133120277 | 133120277 | G | T | G | K    | exonic     | LYPD1     | silent   | NM_001077427:p.I27I   |
| 16461 | 2 | 134876999 | 134876999 | G | C | G | S    | intronic   | MGAT5     | NA       | NA                    |
| 16461 | 2 | 140845229 | 140845229 | C | T | C | Y    | exonic     | LRP1B     | missense | NM_018557:p.G3622S    |
| 16461 | 2 | 141014986 | 141014986 | A | T | A | W    | intronic   | LRP1B     | NA       | NA                    |
| 16461 | 2 | 141014989 | 141014989 | A | C | A | M    | intronic   | LRP1B     | NA       | NA                    |
| 16461 | 2 | 141174422 | 141174422 | C | A | C | M    | exonic     | LRP1B     | missense | NM_018557:p.K2222N    |
| 16461 | 2 | 144870306 | 144870306 | T | A | T | W    | intronic   | ZEB2      | NA       | NA                    |
| 16461 | 2 | 160407210 | 160407210 | G | C | G | S    | intronic   | LY75      | NA       | NA                    |
| 16461 | 2 | 165919106 | 165919106 | G | T | G | K    | exonic     | SCN2A     | missense | NM_021007:p.Q1026H    |
| 16461 | 2 | 165953809 | 165953809 | A | T | A | W    | exonic     | SCN2A     | silent   | NM_021007:p.P1749P    |
| 16461 | 2 | 170225814 | 170225814 | G | C | G | S    | intronic   | C2orf77   | NA       | NA                    |
| 16461 | 2 | 170523284 | 170523284 | T | A | T | W    | splicing   | UBR3      | NA       | NA                    |
| 16461 | 2 | 173764178 | 173764178 | A | T | A | W    | intronic   | ZAK       | NA       | NA                    |
| 16461 | 2 | 179323490 | 179323490 | C | A | C | M    | exonic     | TTN       | missense | NM_133379:p.C3961F    |
| 16461 | 2 | 183501263 | 183501263 | C | T | C | Y    | intronic   | NCKAP1    | NA       | NA                    |
| 16461 | 2 | 189626349 | 189626349 | - | A | C | */+A | intronic   | COL5A2    | NA       | NA                    |
| 16461 | 2 | 190041483 | 190041483 | C | G | C | S    | exonic     | WDR75     | missense | NM_032168:p.L556V     |
| 16461 | 2 | 196892456 | 196892456 | T | A | T | W    | exonic     | HECW2     | missense | NM_020760:p.E468V     |
| 16461 | 2 | 196895457 | 196895457 | G | T | G | K    | exonic     | HECW2     | missense | NM_020760:p.Q292K     |
| 16461 | 2 | 197654791 | 197654791 | T | A | T | W    | intronic   | ANKRD44   | NA       | NA                    |
| 16461 | 2 | 202311651 | 202311651 | C | A | C | M    | exonic     | ALS2      | missense | NM_020919:p.A802S     |
| 16461 | 2 | 204245256 | 204245256 | C | T | C | Y    | intergenic | NA        | NA       | NA                    |
| 16461 | 2 | 207340018 | 207340018 | C | G | C | S    | exonic     | FASTKD2   | missense | NM_014929:p.S119C     |
| 16461 | 2 | 214853634 | 214853634 | G | T | G | K    | intronic   | SPAG16    | NA       | NA                    |
| 16461 | 2 | 215526903 | 215526903 | C | T | C | Y    | exonic     | ABCA12    | missense | NM_173076:p.M2189I    |
| 16461 | 2 | 220054566 | 220054566 | G | T | G | K    | intronic   | SPEG      | NA       | NA                    |
| 16461 | 2 | 220079305 | 220079305 | C | T | C | Y    | exonic     | GMPPA     | missense | NM_205847:p.P360L     |
| 16461 | 2 | 230369622 | 230369622 | T | C | T | Y    | exonic     | TRIP12    | missense | NM_004238:p.K1174E    |
| 16461 | 2 | 230817919 | 230817919 | C | A | C | M    | intronic   | SP140     | NA       | NA                    |
| 16461 | 2 | 237909496 | 237909496 | C | A | C | M    | intronic   | COL6A3    | NA       | NA                    |
| 16461 | 2 | 238831810 | 238831810 | G | A | G | R    | intronic   | PER2      | NA       | NA                    |
| 16461 | 2 | 238831812 | 238831812 | C | A | C | M    | intronic   | PER2      | NA       | NA                    |
| 16461 | 3 | 7696961   | 7696961   | T | A | T | W    | exonic     | GRM7      | missense | NM_000844:p.C893S     |
| 16461 | 3 | 9388215   | 9388215   | G | A | G | R    | exonic     | THUMP3    | missense | NM_015453:p.V268M     |
| 16461 | 3 | 19957830  | 19957830  | A | G | A | R    | intergenic | NA        | NA       | NA                    |
| 16461 | 3 | 26726103  | 26726103  | G | C | G | S    | UTR5       | LRRC3B    | NA       | NA                    |
| 16461 | 3 | 27734163  | 27734163  | C | A | C | M    | exonic     | EOMES     | missense | NM_005442:p.R488L     |
| 16461 | 3 | 29104549  | 29104549  | G | A | G | R    | intergenic | NA        | NA       | NA                    |
| 16461 | 3 | 34890053  | 34890053  | T | C | T | Y    | intergenic | NA        | NA       | NA                    |
| 16461 | 3 | 37340427  | 37340427  | G | A | G | R    | exonic     | GOLGA4    | silent   | NM_001172713:p.K704K  |
| 16461 | 3 | 38805599  | 38805599  | G | T | G | K    | intronic   | SCN10A    | NA       | NA                    |
| 16461 | 3 | 43616949  | 43616949  | T | C | T | Y    | exonic     | ANO10     | missense | NM_018075:p.K90E      |
| 16461 | 3 | 47274025  | 47274025  | C | T | C | Y    | exonic     | KIF9      | missense | NM_022342:p.M337I     |
| 16461 | 3 | 47944877  | 47944877  | G | T | G | K    | intronic   | MAP4      | NA       | NA                    |
| 16461 | 3 | 48673212  | 48673212  | G | A | G | R    | exonic     | CELSR3    | silent   | NM_001407:p.I620I     |
| 16461 | 3 | 49058789  | 49058789  | T | C | T | Y    | intronic   | QRICH1    | NA       | NA                    |

|       |   |           |           |   |   |   |      |            |           |          |                      |
|-------|---|-----------|-----------|---|---|---|------|------------|-----------|----------|----------------------|
| 16461 | 3 | 49058972  | 49058972  | C | A | C | M    | exonic     | QRICH1    | missense | NM_198880:p.V521L    |
| 16461 | 3 | 49136022  | 49136022  | C | A | C | M    | exonic     | LAMB2     | missense | NM_002292:p.D1282Y   |
| 16461 | 3 | 49637551  | 49637551  | G | C | G | S    | exonic     | BSN       | missense | NM_003458:p.A122P    |
| 16461 | 3 | 49670477  | 49670477  | C | A | C | M    | exonic     | BSN       | missense | NM_003458:p.F2828L   |
| 16461 | 3 | 52521651  | 52521651  | G | A | G | R    | splicing   | STAB1     | NA       | NA                   |
| 16461 | 3 | 52527045  | 52527045  | G | T | G | K    | exonic     | STAB1     | missense | NM_015136:p.A1583S   |
| 16461 | 3 | 52744060  | 52744060  | A | C | A | M    | intronic   | NEK4      | NA       | NA                   |
| 16461 | 3 | 52921721  | 52921721  | G | T | G | K    | intronic   | SFMBT1    | NA       | NA                   |
| 16461 | 3 | 54057799  | 54057799  | T | - | A | */-T | intergenic | NA        | NA       | NA                   |
| 16461 | 3 | 57258554  | 57258554  | G | T | G | K    | exonic     | APPL1     | silent   | NM_012096:p.V330V    |
| 16461 | 3 | 62085188  | 62085188  | C | A | C | M    | ncRNA      | ID2B      | NA       | NA                   |
| 16461 | 3 | 62331016  | 62331016  | G | T | G | K    | exonic     | FEZF2     | missense | NM_018008:p.Q388K    |
| 16461 | 3 | 68767846  | 68767846  | G | T | G | K    | intergenic | NA        | NA       | NA                   |
| 16461 | 3 | 69133464  | 69133464  | T | A | T | W    | exonic     | C3orf64   | missense | NM_173654:p.M238L    |
| 16461 | 3 | 77678297  | 77678297  | C | T | C | Y    | exonic     | ROBO2     | nonsense | NM_001128929:p.Q332X |
| 16461 | 3 | 80089353  | 80089353  | G | T | G | K    | intergenic | NA        | NA       | NA                   |
| 16461 | 3 | 88449186  | 88449186  | G | A | G | R    | intergenic | NA        | NA       | NA                   |
| 16461 | 3 | 90347437  | 90347437  | G | A | G | R    | intergenic | NA        | NA       | NA                   |
| 16461 | 3 | 95708376  | 95708376  | T | G | T | K    | intergenic | NA        | NA       | NA                   |
| 16461 | 3 | 108050325 | 108050325 | C | A | C | M    | intergenic | NA        | NA       | NA                   |
| 16461 | 3 | 110673103 | 110673103 | C | A | C | M    | intronic   | FLJ25363  | NA       | NA                   |
| 16461 | 3 | 112808383 | 112808383 | T | A | T | W    | intronic   | CD96      | NA       | NA                   |
| 16461 | 3 | 114996650 | 114996650 | G | T | G | K    | exonic     | ATP6V1A   | missense | NM_001690:p.G379C    |
| 16461 | 3 | 115552544 | 115552544 | C | G | C | S    | exonic     | ZBTB20    | silent   | NM_001164346:p.T284T |
| 16461 | 3 | 120106213 | 120106213 | C | A | C | M    | exonic     | IGSF11    | nonsense | NM_152538:p.E275X    |
| 16461 | 3 | 120617611 | 120617611 | C | A | C | M    | exonic     | ARHGAP31  | missense | NM_020754:p.T1382K   |
| 16461 | 3 | 121008984 | 121008984 | G | T | G | K    | splicing   | NR1I2     | missense | NM_033013:p.R66M     |
| 16461 | 3 | 128777407 | 128777407 | C | A | C | M    | intronic   | TPRA1     | NA       | NA                   |
| 16461 | 3 | 132776642 | 132776642 | A | C | A | M    | exonic     | CPNE4     | missense | NM_130808:p.L297W    |
| 16461 | 3 | 150575884 | 150575884 | T | C | T | Y    | intronic   | TM4SF1    | NA       | NA                   |
| 16461 | 3 | 157376639 | 157376639 | C | A | C | M    | intronic   | KCNAB1    | NA       | NA                   |
| 16461 | 3 | 166199044 | 166199044 | G | T | G | K    | exonic     | SI        | missense | NM_001041:p.D1506E   |
| 16461 | 3 | 170316012 | 170316012 | C | A | C | M    | exonic     | MECOM     | missense | NM_001163999:p.S594I |
| 16461 | 3 | 171103787 | 171103787 | G | T | G | K    | intergenic | NA        | NA       | NA                   |
| 16461 | 3 | 177178527 | 177178527 | C | A | C | M    | intergenic | NA        | NA       | NA                   |
| 16461 | 3 | 182148360 | 182148360 | C | T | C | Y    | exonic     | FXR1      | missense | NM_001013438:p.A71V  |
| 16461 | 3 | 185259130 | 185259130 | C | T | C | Y    | intronic   | HTR3C     | NA       | NA                   |
| 16461 | 3 | 185365290 | 185365290 | A | G | A | R    | exonic     | DVL3      | missense | NM_004423:p.N159S    |
| 16461 | 3 | 188453611 | 188453611 | G | T | G | K    | ncRNA      | MASP1     | NA       | NA                   |
| 16461 | 3 | 191173270 | 191173270 | C | G | C | S    | intronic   | LEPREL1   | NA       | NA                   |
| 16461 | 3 | 192419303 | 192419303 | C | G | C | S    | exonic     | OSTN      | missense | NM_198184:p.T59R     |
| 16461 | 3 | 197871164 | 197871164 | A | T | A | W    | exonic     | LRRC33    | missense | NM_198565:p.S85C     |
| 16461 | 4 | 1331974   | 1331974   | G | T | G | K    | exonic     | KIAA1530  | missense | NM_020894:p.C32F     |
| 16461 | 4 | 1378655   | 1378655   | A | T | A | W    | exonic     | CRIPAK    | missense | NM_175918:p.H119L    |
| 16461 | 4 | 4462215   | 4462215   | C | A | C | M    | exonic     | D4S234E   | silent   | NM_014392:p.V87V     |
| 16461 | 4 | 30335103  | 30335103  | C | A | C | M    | exonic     | PCDH7     | silent   | NM_001173523:p.P987P |
| 16461 | 4 | 36185245  | 36185245  | T | A | T | W    | intergenic | NA        | NA       | NA                   |
| 16461 | 4 | 42148788  | 42148788  | G | A | G | R    | exonic     | ATP8A1    | silent   | NM_006095:p.L955L    |
| 16461 | 4 | 45794051  | 45794051  | A | G | A | R    | exonic     | GABRG1    | silent   | NM_173536:p.I59I     |
| 16461 | 4 | 45947060  | 45947060  | C | T | C | Y    | UTR3       | GABRA2    | NA       | NA                   |
| 16461 | 4 | 47637581  | 47637581  | G | T | G | K    | exonic     | CNGA1     | nonsense | NM_001142564:p.S276X |
| 16461 | 4 | 49224122  | 49224122  | G | A | G | R    | intergenic | NA        | NA       | NA                   |
| 16461 | 4 | 56457800  | 56457800  | T | G | T | K    | exonic     | EXOC1     | missense | NM_018261:p.L705R    |
| 16461 | 4 | 57571330  | 57571330  | G | T | G | K    | exonic     | POLR2B    | missense | NM_000938:p.R484L    |
| 16461 | 4 | 57593331  | 57593331  | G | C | G | S    | intronic   | IGFBP7    | NA       | NA                   |
| 16461 | 4 | 63898555  | 63898555  | C | A | C | M    | intergenic | NA        | NA       | NA                   |
| 16461 | 4 | 68462850  | 68462850  | G | T | G | K    | intronic   | TMPRSS11A | NA       | NA                   |
| 16461 | 4 | 68885405  | 68885405  | G | C | G | S    | exonic     | YTHDC1    | missense | NM_133370:p.S273C    |
| 16461 | 4 | 70857626  | 70857626  | G | T | G | K    | exonic     | CSN2      | silent   | NM_001891:p.I210I    |
| 16461 | 4 | 77162380  | 77162380  | A | T | A | W    | intronic   | ART3      | NA       | NA                   |
| 16461 | 4 | 82284529  | 82284529  | A | G | A | R    | intronic   | PRKG2     | NA       | NA                   |
| 16461 | 4 | 85927757  | 85927757  | G | C | G | S    | exonic     | WDFY3     | missense | NM_014991:p.T1268R   |
| 16461 | 4 | 89602386  | 89602386  | C | A | C | M    | exonic     | HERC5     | missense | NM_016323:p.P182T    |
| 16461 | 4 | 89641081  | 89641081  | G | A | G | R    | intronic   | HERC5     | NA       | NA                   |
| 16461 | 4 | 103602003 | 103602003 | A | C | A | M    | intergenic | NA        | NA       | NA                   |
| 16461 | 4 | 109993594 | 109993594 | C | A | C | M    | intronic   | COL25A1   | NA       | NA                   |
| 16461 | 4 | 111617255 | 111617255 | C | T | C | Y    | exonic     | ENPEP     | missense | NM_001977:p.P79L     |
| 16461 | 4 | 114497796 | 114497796 | G | C | G | S    | exonic     | ANK2      | missense | NM_001148:p.G2858A   |
| 16461 | 4 | 120534957 | 120534957 | C | A | C | M    | intergenic | NA        | NA       | NA                   |
| 16461 | 4 | 123521791 | 123521791 | T | G | T | K    | intronic   | ADAD1     | NA       | NA                   |
| 16461 | 4 | 123548664 | 123548664 | T | A | T | W    | intronic   | ADAD1     | NA       | NA                   |
| 16461 | 4 | 126592414 | 126592414 | G | C | G | S    | exonic     | FAT4      | missense | NM_024582:p.G3598A   |
| 16461 | 4 | 130247211 | 130247211 | G | A | G | R    | exonic     | C4orf33   | silent   | NM_001099783:p.L67L  |
| 16461 | 4 | 137496262 | 137496262 | C | G | C | S    | intergenic | NA        | NA       | NA                   |
| 16461 | 4 | 146989891 | 146989891 | C | A | C | M    | intronic   | ZNF827    | NA       | NA                   |
| 16461 | 4 | 151373357 | 151373357 | A | C | A | M    | exonic     | DCLK2     | missense | NM_001040261:p.N515T |
| 16461 | 4 | 152242681 | 152242681 | C | G | C | S    | intronic   | RPS3A     | NA       | NA                   |
| 16461 | 4 | 154011414 | 154011414 | C | G | C | S    | exonic     | ARFIP1    | missense | NM_001025595:p.L88V  |
| 16461 | 4 | 154776856 | 154776856 | T | C | T | Y    | intronic   | KIAA0922  | NA       | NA                   |

|       |   |           |           |   |   |   |      |            |           |          |                      |
|-------|---|-----------|-----------|---|---|---|------|------------|-----------|----------|----------------------|
| 16461 | 4 | 158476255 | 158476255 | C | T | C | Y    | intronic   | GRIA2     | NA       | NA                   |
| 16461 | 4 | 166440254 | 166440254 | C | G | C | S    | exonic     | KLHL2     | missense | NM_001161522:p.P218R |
| 16461 | 4 | 172272079 | 172272079 | C | A | C | M    | intergenic | NA        | NA       | NA                   |
| 16461 | 4 | 175801572 | 175801572 | A | G | A | R    | exonic     | GLRA3     | silent   | NM_006529:p.I445I    |
| 16461 | 4 | 177320231 | 177320231 | A | T | A | W    | exonic     | WDR17     | missense | NM_181265:p.K921I    |
| 16461 | 4 | 177320241 | 177320241 | A | G | A | R    | exonic     | WDR17     | silent   | NM_181265:p.K924K    |
| 16461 | 4 | 187357026 | 187357026 | C | T | C | Y    | intronic   | CYP4V2    | NA       | NA                   |
| 16461 | 5 | 5235462   | 5235462   | T | A | T | W    | intronic   | ADAMTS16  | NA       | NA                   |
| 16461 | 5 | 11045745  | 11045745  | G | C | G | S    | exonic     | CTNND2    | missense | NM_001332:p.I1043M   |
| 16461 | 5 | 13767479  | 13767479  | C | A | C | M    | intronic   | DNAH5     | NA       | NA                   |
| 16461 | 5 | 14560397  | 14560397  | G | T | G | K    | intronic   | TRIO      | NA       | NA                   |
| 16461 | 5 | 23340217  | 23340217  | G | C | G | S    | intergenic | NA        | NA       | NA                   |
| 16461 | 5 | 26775610  | 26775610  | C | A | C | M    | intergenic | NA        | NA       | NA                   |
| 16461 | 5 | 32127020  | 32127020  | G | C | G | S    | exonic     | PDZD2     | missense | NM_178140:p.R2570T   |
| 16461 | 5 | 36084553  | 36084553  | T | A | T | W    | ncRNA      | UGT3A2    | NA       | NA                   |
| 16461 | 5 | 37053062  | 37053062  | G | T | G | K    | intronic   | NIPBL     | NA       | NA                   |
| 16461 | 5 | 38524973  | 38524973  | C | G | C | S    | exonic     | LIFR      | missense | NM_002310:p.E767Q    |
| 16461 | 5 | 40868546  | 40868546  | C | A | C | M    | ncRNA      | SNORD72   | NA       | NA                   |
| 16461 | 5 | 41621929  | 41621929  | C | A | C | M    | intergenic | NA        | NA       | NA                   |
| 16461 | 5 | 41885842  | 41885842  | C | A | C | M    | intronic   | OXCT1     | NA       | NA                   |
| 16461 | 5 | 50156547  | 50156547  | G | A | G | R    | exonic     | PARP8     | missense | NM_001178056:p.A595T |
| 16461 | 5 | 52251931  | 52251931  | G | C | G | S    | exonic     | ITGA1     | missense | NM_181501:p.R723P    |
| 16461 | 5 | 52358526  | 52358526  | T | G | T | K    | intronic   | ITGA2     | NA       | NA                   |
| 16461 | 5 | 54502108  | 54502108  | G | T | G | K    | intronic   | CDC20B    | NA       | NA                   |
| 16461 | 5 | 55524760  | 55524760  | G | A | G | R    | intronic   | ANKRD55   | NA       | NA                   |
| 16461 | 5 | 56210598  | 56210598  | G | T | G | K    | exonic     | MAP3K1    | missense | NM_005921:p.C667F    |
| 16461 | 5 | 56651307  | 56651307  | A | T | A | W    | intergenic | NA        | NA       | NA                   |
| 16461 | 5 | 75407277  | 75407277  | C | A | C | M    | intergenic | NA        | NA       | NA                   |
| 16461 | 5 | 75708544  | 75708544  | A | T | A | W    | intergenic | NA        | NA       | NA                   |
| 16461 | 5 | 76877809  | 76877809  | G | C | G | S    | intergenic | NA        | NA       | NA                   |
| 16461 | 5 | 78842425  | 78842425  | T | C | T | Y    | intronic   | HOMER1    | NA       | NA                   |
| 16461 | 5 | 98221948  | 98221948  | C | A | C | M    | exonic     | CHD1      | missense | NM_001270:p.R1541S   |
| 16461 | 5 | 101736878 | 101736878 | A | G | A | R    | intronic   | SLCO6A1   | NA       | NA                   |
| 16461 | 5 | 107939229 | 107939229 | G | T | G | K    | intergenic | NA        | NA       | NA                   |
| 16461 | 5 | 112207331 | 112207331 | G | A | G | R    | exonic     | APC       | missense | NM_000038:p.R2714H   |
| 16461 | 5 | 127148519 | 127148519 | G | T | G | K    | intergenic | NA        | NA       | NA                   |
| 16461 | 5 | 128348808 | 128348808 | G | C | G | S    | exonic     | SLC27A6   | missense | NM_014031:p.G189R    |
| 16461 | 5 | 134168556 | 134168556 | C | A | C | M    | intronic   | DDX46     | NA       | NA                   |
| 16461 | 5 | 138735759 | 138735759 | G | C | G | S    | exonic     | SLC23A1   | nonsense | NM_152685:p.Y548X    |
| 16461 | 5 | 140495585 | 140495585 | C | A | C | M    | exonic     | PCDHB5    | missense | NM_015669:p.H129N    |
| 16461 | 5 | 140543660 | 140543660 | G | C | G | S    | exonic     | PCDHB16   | missense | NM_020957:p.A448P    |
| 16461 | 5 | 140554588 | 140554588 | G | T | G | K    | exonic     | PCDHB10   | missense | NM_018930:p.G760V    |
| 16461 | 5 | 140568759 | 140568759 | C | A | C | M    | exonic     | PCDHB12   | missense | NM_018932:p.N32K     |
| 16461 | 5 | 140575571 | 140575571 | G | A | G | R    | exonic     | PCDHB13   | silent   | NM_018933:p.P564P    |
| 16461 | 5 | 140700677 | 140700677 | C | A | C | M    | exonic     | PCDHGA2   | missense | NM_018915:p.P652H    |
| 16461 | 5 | 142415862 | 142415862 | C | G | C | S    | intronic   | ARHGAP26  | NA       | NA                   |
| 16461 | 5 | 147908544 | 147908544 | G | A | G | R    | exonic     | HTR4      | missense | NM_001040173:p.A78V  |
| 16461 | 5 | 154377338 | 154377338 | C | T | C | Y    | UTR3       | KIF4B     | NA       | NA                   |
| 16461 | 5 | 156840686 | 156840686 | G | A | G | R    | intronic   | ADAM19    | NA       | NA                   |
| 16461 | 5 | 179065886 | 179065886 | C | T | C | Y    | exonic     | CANX      | missense | NM_001746:p.P65S     |
| 16461 | 5 | 179161081 | 179161081 | G | T | G | K    | intronic   | MGAT4B    | NA       | NA                   |
| 16461 | 5 | 179975918 | 179975918 | C | A | C | M    | intronic   | FLT4      | NA       | NA                   |
| 16461 | 6 | 3171032   | 3171032   | G | T | G | K    | exonic     | TUBB2B    | missense | NM_178012:p.A97D     |
| 16461 | 6 | 4044368   | 4044368   | G | T | G | K    | exonic     | C6orf201  | missense | NM_001085401:p.W74L  |
| 16461 | 6 | 4660964   | 4660964   | G | T | G | K    | ncRNA      | CDYL      | NA       | NA                   |
| 16461 | 6 | 10683273  | 10683273  | C | T | C | Y    | intronic   | GCNT2     | NA       | NA                   |
| 16461 | 6 | 16393894  | 16393894  | G | T | G | K    | intronic   | GMPR      | NA       | NA                   |
| 16461 | 6 | 24564784  | 24564784  | C | A | C | M    | exonic     | GPLD1     | missense | NM_001503:p.G357C    |
| 16461 | 6 | 25131631  | 25131631  | G | T | G | K    | intergenic | NA        | NA       | NA                   |
| 16461 | 6 | 26199257  | 26199257  | C | T | C | Y    | exonic     | HFE       | missense | NM_139006:p.H96Y     |
| 16461 | 6 | 27222111  | 27222111  | C | G | C | S    | intronic   | HIST1H2BK | NA       | NA                   |
| 16461 | 6 | 28401960  | 28401960  | T | A | T | W    | exonic     | ZNF323    | nonsense | NM_001135216:p.K395X |
| 16461 | 6 | 29163039  | 29163039  | T | C | T | Y    | UTR5       | OR2B3     | NA       | NA                   |
| 16461 | 6 | 29749119  | 29749119  | G | C | G | S    | exonic     | ZFP57     | missense | NM_001109809:p.R250G |
| 16461 | 6 | 31739908  | 31739908  | C | T | C | Y    | exonic     | GPANK1    | silent   | NM_001199237:p.L109L |
| 16461 | 6 | 32036663  | 32036663  | C | T | C | Y    | intronic   | SKIV2L    | NA       | NA                   |
| 16461 | 6 | 32038283  | 32038283  | G | T | G | K    | exonic     | SKIV2L    | missense | NM_006929:p.G385W    |
| 16461 | 6 | 36550754  | 36550754  | A | G | A | R    | exonic     | KCTD20    | missense | NM_173562:p.D124G    |
| 16461 | 6 | 38939622  | 38939622  | G | T | G | K    | intronic   | DNAH8     | NA       | NA                   |
| 16461 | 6 | 41992505  | 41992505  | G | C | G | S    | exonic     | MED20     | missense | NM_004275:p.S55R     |
| 16461 | 6 | 42959231  | 42959231  | A | T | A | W    | exonic     | RPL7L1    | missense | NM_198486:p.Q62L     |
| 16461 | 6 | 43328845  | 43328845  | T | C | T | Y    | intronic   | TTBK1     | NA       | NA                   |
| 16461 | 6 | 45567842  | 45567842  | C | A | C | M    | intronic   | RUNX2     | NA       | NA                   |
| 16461 | 6 | 46025135  | 46025135  | G | T | G | K    | intronic   | CLIC5     | NA       | NA                   |
| 16461 | 6 | 49910960  | 49910960  | G | T | G | K    | UTR3       | CRISP1    | NA       | NA                   |
| 16461 | 6 | 50894630  | 50894630  | G | C | G | S    | exonic     | TFAP2B    | missense | NM_003221:p.E23Q     |
| 16461 | 6 | 54597675  | 54597675  | C | A | C | M    | intergenic | NA        | NA       | NA                   |
| 16461 | 6 | 55236465  | 55236465  | T | - | G | */-T | splicing   | HCRTR2    | FS_del   | NM_001526:p.G216fs   |
| 16461 | 6 | 56588805  | 56588805  | C | G | C | S    | exonic     | DST       | silent   | NM_001723:p.R2473R   |

|       |   |           |           |   |       |   |          |            |           |          |                      |
|-------|---|-----------|-----------|---|-------|---|----------|------------|-----------|----------|----------------------|
| 16461 | 6 | 66860253  | 66860253  | A | T     | A | W        | intergenic | NA        | NA       | NA                   |
| 16461 | 6 | 70139107  | 70139107  | T | A     | T | W        | intronic   | BAI3      | NA       | NA                   |
| 16461 | 6 | 70998985  | 70998985  | C | A     | C | M        | intronic   | COL9A1    | NA       | NA                   |
| 16461 | 6 | 86310145  | 86310145  | C | G     | C | S        | exonic     | SNX14     | silent   | NM_020468:p.L343L    |
| 16461 | 6 | 88442381  | 88442381  | G | C     | G | S        | intronic   | AKIRIN2   | NA       | NA                   |
| 16461 | 6 | 94177383  | 94177383  | G | A     | G | R        | exonic     | EPHA7     | missense | NM_004440:p.T130I    |
| 16461 | 6 | 110219483 | 110219483 | G | A     | G | R        | intronic   | FIG4      | NA       | NA                   |
| 16461 | 6 | 112777975 | 112777975 | C | T     | C | Y        | exonic     | RFPL4B    | silent   | NM_001013734:p.H124H |
| 16461 | 6 | 116370710 | 116370710 | C | A     | C | M        | intronic   | FRK       | NA       | NA                   |
| 16461 | 6 | 117220453 | 117220453 | - | AGGTA | C | */+AGGTA | exonic     | GPRC6A    | FS_ins   | NM_148963:p.E776fs   |
| 16461 | 6 | 117353301 | 117353301 | C | G     | C | S        | intronic   | RFX6      | NA       | NA                   |
| 16461 | 6 | 122794791 | 122794791 | C | A     | C | M        | exonic     | HSF2      | silent   | NM_004506:p.T446T    |
| 16461 | 6 | 126283848 | 126283848 | G | T     | G | K        | exonic     | NCOA7     | nonsense | NM_001199621:p.E656X |
| 16461 | 6 | 129691339 | 129691339 | T | A     | T | W        | intronic   | LAMA2     | NA       | NA                   |
| 16461 | 6 | 143134953 | 143134953 | C | A     | C | M        | exonic     | HIVEP2    | missense | NM_006734:p.Q872H    |
| 16461 | 6 | 147676751 | 147676751 | A | T     | A | W        | exonic     | STXBP5    | missense | NM_001127715:p.H395L |
| 16461 | 6 | 150309322 | 150309322 | G | C     | G | S        | exonic     | ULBP2     | missense | NM_025217:p.M157I    |
| 16461 | 6 | 152748603 | 152748603 | C | A     | C | M        | exonic     | SYNE1     | nonsense | NM_182961:p.E2851X   |
| 16461 | 6 | 152861661 | 152861661 | A | T     | A | W        | intronic   | SYNE1     | NA       | NA                   |
| 16461 | 6 | 155661271 | 155661271 | G | C     | G | S        | intronic   | TFB1M     | NA       | NA                   |
| 16461 | 6 | 159380240 | 159380240 | T | A     | T | W        | exonic     | TAGAP     | missense | NM_152133:p.N48I     |
| 16461 | 7 | 7496765   | 7496765   | C | G     | C | S        | exonic     | COL28A1   | missense | NM_001037763:p.G355A |
| 16461 | 7 | 10457619  | 10457619  | G | T     | G | K        | intergenic | NA        | NA       | NA                   |
| 16461 | 7 | 10458497  | 10458497  | C | A     | C | M        | intergenic | NA        | NA       | NA                   |
| 16461 | 7 | 17968794  | 17968794  | C | A     | C | M        | intergenic | NA        | NA       | NA                   |
| 16461 | 7 | 29218451  | 29218451  | G | T     | G | K        | intronic   | CHN2      | NA       | NA                   |
| 16461 | 7 | 29572423  | 29572423  | G | T     | G | K        | UTR5       | PRR15     | NA       | NA                   |
| 16461 | 7 | 36412459  | 36412459  | C | T     | C | Y        | exonic     | ANLN      | missense | NM_018685:p.S211F    |
| 16461 | 7 | 37425779  | 37425779  | T | A     | T | W        | intronic   | ELMO1     | NA       | NA                   |
| 16461 | 7 | 40159378  | 40159378  | G | A     | G | R        | intronic   | C7orf10   | NA       | NA                   |
| 16461 | 7 | 45716690  | 45716690  | G | C     | G | S        | exonic     | ADCY1     | missense | NM_021116:p.A991P    |
| 16461 | 7 | 50630670  | 50630670  | T | G     | T | K        | exonic     | GRB10     | silent   | NM_001001550:p.T474T |
| 16461 | 7 | 51063727  | 51063727  | C | A     | C | M        | exonic     | COBL      | missense | NM_015198:p.V854F    |
| 16461 | 7 | 53071619  | 53071619  | C | A     | C | M        | exonic     | POM121L12 | missense | NM_182595:p.S254Y    |
| 16461 | 7 | 55427007  | 55427007  | C | A     | C | M        | exonic     | LANCL2    | missense | NM_018697:p.Q78K     |
| 16461 | 7 | 56326501  | 56326501  | C | A     | C | M        | intergenic | NA        | NA       | NA                   |
| 16461 | 7 | 77217048  | 77217048  | G | T     | G | K        | exonic     | RSBN1L    | missense | NM_198467:p.A359S    |
| 16461 | 7 | 77635373  | 77635373  | G | A     | G | R        | intronic   | MAGI2     | NA       | NA                   |
| 16461 | 7 | 86306488  | 86306488  | C | T     | C | Y        | exonic     | GRM3      | silent   | NM_000840:p.D574D    |
| 16461 | 7 | 89765052  | 89765052  | G | T     | G | K        | exonic     | C7orf63   | missense | NM_001160138:p.G592V |
| 16461 | 7 | 90422981  | 90422981  | C | T     | C | Y        | exonic     | CDK14     | missense | NM_012395:p.T269I    |
| 16461 | 7 | 93463597  | 93463597  | T | A     | T | W        | intronic   | BET1      | NA       | NA                   |
| 16461 | 7 | 95272032  | 95272032  | G | T     | G | K        | exonic     | DYNC111   | missense | NM_001135556:p.A19S  |
| 16461 | 7 | 100625934 | 100625934 | G | T     | G | K        | UTR3       | MOGAT3    | NA       | NA                   |
| 16461 | 7 | 102367325 | 102367325 | T | C     | T | Y        | intronic   | FBXL13    | NA       | NA                   |
| 16461 | 7 | 104569661 | 104569661 | G | T     | G | K        | intronic   | SRPK2     | NA       | NA                   |
| 16461 | 7 | 104569662 | 104569662 | G | T     | G | K        | intronic   | SRPK2     | NA       | NA                   |
| 16461 | 7 | 106307125 | 106307125 | C | A     | C | M        | intronic   | PIK3CG    | NA       | NA                   |
| 16461 | 7 | 107483235 | 107483235 | G | T     | G | K        | intronic   | LAMB4     | NA       | NA                   |
| 16461 | 7 | 107607974 | 107607974 | T | A     | T | W        | exonic     | NRCAM     | missense | NM_001193582:p.N927I |
| 16461 | 7 | 115986415 | 115986415 | G | T     | G | K        | exonic     | CAV1      | silent   | NM_001172895:p.L94L  |
| 16461 | 7 | 121395349 | 121395349 | A | G     | A | R        | exonic     | PTPRZ1    | missense | NM_002851:p.K78R     |
| 16461 | 7 | 121465954 | 121465954 | A | T     | A | W        | intronic   | PTPRZ1    | NA       | NA                   |
| 16461 | 7 | 131037696 | 131037696 | C | A     | C | M        | intergenic | NA        | NA       | NA                   |
| 16461 | 7 | 131228124 | 131228124 | G | T     | G | K        | intergenic | NA        | NA       | NA                   |
| 16461 | 7 | 131563655 | 131563655 | T | A     | T | W        | exonic     | PLXNA4    | missense | NM_020911:p.Y573F    |
| 16461 | 7 | 133783782 | 133783782 | C | T     | C | Y        | exonic     | AKR1B1    | missense | NM_001628:p.E186K    |
| 16461 | 7 | 139373734 | 139373734 | C | G     | C | S        | intronic   | PARP12    | NA       | NA                   |
| 16461 | 7 | 140344583 | 140344583 | A | T     | A | W        | intergenic | NA        | NA       | NA                   |
| 16461 | 7 | 142369256 | 142369256 | T | G     | T | K        | intronic   | KEL       | NA       | NA                   |
| 16461 | 7 | 142629223 | 142629223 | G | T     | G | K        | upstream   | TAS2R40   | NA       | NA                   |
| 16461 | 7 | 149841603 | 149841603 | G | A     | G | R        | intergenic | NA        | NA       | NA                   |
| 16461 | 7 | 151533248 | 151533248 | C | G     | C | S        | intronic   | MLL3      | NA       | NA                   |
| 16461 | 7 | 151591120 | 151591120 | C | A     | C | M        | exonic     | MLL3      | missense | NM_170606:p.V405L    |
| 16461 | 8 | 1795734   | 1795734   | G | C     | G | S        | exonic     | ARHGEF10  | missense | NM_014629:p.C153S    |
| 16461 | 8 | 12538069  | 12538069  | A | T     | A | W        | intergenic | NA        | NA       | NA                   |
| 16461 | 8 | 13303341  | 13303341  | A | G     | A | R        | intronic   | DLC1      | NA       | NA                   |
| 16461 | 8 | 19861109  | 19861109  | T | A     | T | W        | exonic     | LPL       | missense | NM_000237:p.N359K    |
| 16461 | 8 | 24830935  | 24830935  | G | C     | G | S        | exonic     | NEFM      | missense | NM_005382:p.E554D    |
| 16461 | 8 | 26293236  | 26293236  | C | T     | C | Y        | intergenic | NA        | NA       | NA                   |
| 16461 | 8 | 27751995  | 27751995  | C | A     | C | M        | upstream   | PBK       | NA       | NA                   |
| 16461 | 8 | 30330244  | 30330244  | C | T     | C | Y        | intergenic | NA        | NA       | NA                   |
| 16461 | 8 | 32719769  | 32719769  | A | T     | A | W        | exonic     | NRG1      | missense | NM_001160004:p.N223Y |
| 16461 | 8 | 34300380  | 34300380  | T | G     | T | K        | intergenic | NA        | NA       | NA                   |
| 16461 | 8 | 37812217  | 37812217  | T | A     | T | W        | intronic   | GPR124    | NA       | NA                   |
| 16461 | 8 | 39134610  | 39134610  | A | G     | A | R        | intronic   | ADAM32    | NA       | NA                   |
| 16461 | 8 | 43245201  | 43245201  | C | A     | C | M        | intergenic | NA        | NA       | NA                   |
| 16461 | 8 | 86229469  | 86229469  | A | T     | A | W        | exonic     | LRRCC1    | nonsense | NM_033402:p.R564X    |
| 16461 | 8 | 86576541  | 86576541  | C | G     | C | S        | intronic   | CA2       | NA       | NA                   |

|       |    |           |           |   |   |   |      |            |          |          |                       |
|-------|----|-----------|-----------|---|---|---|------|------------|----------|----------|-----------------------|
| 16461 | 8  | 87124642  | 87124642  | A | C | A | M    | intergenic | NA       | NA       | NA                    |
| 16461 | 8  | 87626140  | 87626140  | G | T | G | K    | exonic     | CPNE3    | missense | NM_003909:p.Q230H     |
| 16461 | 8  | 91051864  | 91051864  | C | G | C | S    | exonic     | NBN      | missense | NM_002485:p.G267A     |
| 16461 | 8  | 92991445  | 92991445  | G | T | G | K    | intergenic | NA       | NA       | NA                    |
| 16461 | 8  | 95847099  | 95847099  | G | T | G | K    | intronic   | DPY19L4  | NA       | NA                    |
| 16461 | 8  | 101788240 | 101788240 | C | A | C | M    | intronic   | PABPC1   | NA       | NA                    |
| 16461 | 8  | 103379883 | 103379883 | C | T | C | Y    | exonic     | UBR5     | missense | NM_015902:p.G1113R    |
| 16461 | 8  | 111049949 | 111049949 | C | A | C | M    | exonic     | KCNV1    | silent   | NM_014379:p.L349L     |
| 16461 | 8  | 113416963 | 113416963 | A | T | A | W    | intronic   | CSMD3    | NA       | NA                    |
| 16461 | 8  | 113654862 | 113654862 | C | T | C | Y    | intronic   | CSMD3    | NA       | NA                    |
| 16461 | 8  | 113940514 | 113940514 | G | A | G | R    | intronic   | CSMD3    | NA       | NA                    |
| 16461 | 8  | 115399933 | 115399933 | C | A | C | M    | intergenic | NA       | NA       | NA                    |
| 16461 | 8  | 116685406 | 116685406 | C | A | C | M    | exonic     | TRPS1    | silent   | NM_014112:p.S655S     |
| 16461 | 8  | 124410121 | 124410121 | T | A | T | W    | intronic   | ATAD2    | NA       | NA                    |
| 16461 | 8  | 131928823 | 131928823 | C | A | C | M    | intronic   | ADCY8    | NA       | NA                    |
| 16461 | 8  | 134194857 | 134194857 | G | C | G | S    | exonic     | TG       | missense | NM_003235:p.E2528Q    |
| 16461 | 8  | 139224498 | 139224498 | G | T | G | K    | exonic     | FAM135B  | silent   | NM_015912:p.R1193R    |
| 16461 | 8  | 139675499 | 139675499 | G | A | G | R    | exonic     | COL22A1  | missense | NM_152888:p.P1520S    |
| 16461 | 8  | 139784745 | 139784745 | C | A | C | M    | exonic     | COL22A1  | missense | NM_152888:p.G849W     |
| 16461 | 8  | 139902637 | 139902637 | A | T | A | W    | exonic     | COL22A1  | missense | NM_152888:p.I390N     |
| 16461 | 9  | 650239    | 650239    | A | G | A | R    | intronic   | KANK1    | NA       | NA                    |
| 16461 | 9  | 2063444   | 2063444   | G | T | G | K    | intronic   | SMARCA2  | NA       | NA                    |
| 16461 | 9  | 4840297   | 4840297   | A | T | A | W    | ncRNA      | MIR101-2 | NA       | NA                    |
| 16461 | 9  | 7467243   | 7467243   | G | C | G | S    | intergenic | NA       | NA       | NA                    |
| 16461 | 9  | 8309927   | 8309927   | G | T | G | K    | exonic     | PTPRD    | missense | NM_002839:p.S1858R    |
| 16461 | 9  | 18625990  | 18625990  | T | A | T | W    | exonic     | ADAMTSL1 | silent   | NM_001040272:p.L217L  |
| 16461 | 9  | 19314540  | 19314540  | A | T | A | W    | intronic   | DENND4C  | NA       | NA                    |
| 16461 | 9  | 23671887  | 23671887  | G | T | G | K    | intergenic | NA       | NA       | NA                    |
| 16461 | 9  | 34600809  | 34600809  | C | A | C | M    | exonic     | C9orf23  | missense | NM_148178:p.R162L     |
| 16461 | 9  | 36090547  | 36090547  | T | C | T | Y    | intronic   | RECK     | NA       | NA                    |
| 16461 | 9  | 36090589  | 36090589  | C | T | C | Y    | intronic   | RECK     | NA       | NA                    |
| 16461 | 9  | 39078457  | 39078457  | G | C | G | S    | exonic     | CNTNAP3  | missense | NM_033655:p.F1061L    |
| 16461 | 9  | 67902712  | 67902712  | G | A | G | R    | intergenic | NA       | NA       | NA                    |
| 16461 | 9  | 72669189  | 72669189  | G | T | G | K    | exonic     | TRPM3    | missense | NM_001007471:p.P79H   |
| 16461 | 9  | 89738762  | 89738762  | G | A | G | R    | intergenic | NA       | NA       | NA                    |
| 16461 | 9  | 93525846  | 93525846  | T | G | T | K    | exonic     | ROR2     | missense | NM_004560:p.E917D     |
| 16461 | 9  | 93535427  | 93535427  | T | A | T | W    | exonic     | ROR2     | silent   | NM_004560:p.T245T     |
| 16461 | 9  | 98325694  | 98325694  | C | T | C | Y    | exonic     | CDC14B   | missense | NM_033331:p.V361M     |
| 16461 | 9  | 98343878  | 98343878  | C | A | C | M    | intronic   | CDC14B   | NA       | NA                    |
| 16461 | 9  | 100870706 | 100870706 | G | T | G | K    | exonic     | COL15A1  | missense | NM_001855:p.G1296C    |
| 16461 | 9  | 105925215 | 105925215 | G | T | G | K    | exonic     | SMC2     | missense | NM_001042550:p.R713L  |
| 16461 | 9  | 115896000 | 115896000 | G | T | G | K    | exonic     | KIF12    | missense | NM_138424:p.H325N     |
| 16461 | 9  | 117203424 | 117203424 | T | C | T | Y    | intronic   | 1-Dec    | NA       | NA                    |
| 16461 | 9  | 118500739 | 118500739 | G | A | G | R    | exonic     | TRIM32   | silent   | NM_001099679:p.R299R  |
| 16461 | 9  | 124720755 | 124720755 | G | A | G | R    | exonic     | ZBTB26   | missense | NM_020924:p.A427V     |
| 16461 | 9  | 128142692 | 128142692 | G | T | G | K    | exonic     | FAM125B  | missense | NM_033446:p.V56L      |
| 16461 | 9  | 130123611 | 130123611 | G | - | T | */-G | intronic   | TRUB2    | NA       | NA                    |
| 16461 | 9  | 130795698 | 130795698 | A | T | A | W    | exonic     | NUP188   | missense | NM_015354:p.Y974F     |
| 16461 | 9  | 131937197 | 131937197 | G | T | G | K    | exonic     | GPR107   | missense | NM_001136558:p.Q564H  |
| 16461 | 9  | 132950840 | 132950840 | C | A | C | M    | exonic     | LAMC3    | missense | NM_006059:p.A1380E    |
| 16461 | 9  | 134196434 | 134196434 | C | A | C | M    | intronic   | SETX     | NA       | NA                    |
| 16461 | 10 | 5822487   | 5822487   | G | T | G | K    | intronic   | C10orf18 | NA       | NA                    |
| 16461 | 10 | 18310291  | 18310291  | G | - | A | */-G | exonic     | SLC39A12 | FS_del   | NM_152725:p.K323fs    |
| 16461 | 10 | 21217119  | 21217119  | T | C | T | Y    | exonic     | NEBL     | silent   | NM_006393:p.K94K      |
| 16461 | 10 | 23522689  | 23522689  | C | A | C | M    | exonic     | PTF1A    | missense | NM_178161:p.H279N     |
| 16461 | 10 | 24850738  | 24850738  | A | G | A | R    | exonic     | KIAA1217 | missense | NM_001098500:p.N697S  |
| 16461 | 10 | 30220103  | 30220103  | G | T | G | K    | intergenic | NA       | NA       | NA                    |
| 16461 | 10 | 34688211  | 34688211  | T | C | T | Y    | exonic     | PARD3    | missense | NM_001184785:p.N646S  |
| 16461 | 10 | 35882090  | 35882090  | G | T | G | K    | exonic     | CCNY     | missense | NM_181698:p.Q185H     |
| 16461 | 10 | 37593419  | 37593419  | A | T | A | W    | intergenic | NA       | NA       | NA                    |
| 16461 | 10 | 51491441  | 51491441  | G | A | G | R    | intergenic | NA       | NA       | NA                    |
| 16461 | 10 | 54197985  | 54197985  | C | G | C | S    | exonic     | MBL2     | missense | NM_000242:p.C222S     |
| 16461 | 10 | 55583106  | 55583106  | C | A | C | M    | intronic   | PCDH15   | NA       | NA                    |
| 16461 | 10 | 59667516  | 59667516  | C | A | C | M    | exonic     | IPMK     | nonsense | NM_152230:p.E86X      |
| 16461 | 10 | 60219055  | 60219055  | G | T | G | K    | exonic     | BICC1    | nonsense | NM_001080512:p.E210X  |
| 16461 | 10 | 60567760  | 60567760  | G | T | G | K    | intergenic | NA       | NA       | NA                    |
| 16461 | 10 | 66255463  | 66255463  | A | T | A | W    | ncRNA      | ANXA2P3  | NA       | NA                    |
| 16461 | 10 | 67418480  | 67418480  | G | T | G | K    | exonic     | CTNNA3   | silent   | NM_013266:p.V747V     |
| 16461 | 10 | 69806512  | 69806512  | G | A | G | R    | intronic   | RUFY2    | NA       | NA                    |
| 16461 | 10 | 97086324  | 97086324  | G | T | G | K    | exonic     | SORBS1   | silent   | NM_001034954:p.R1195R |
| 16461 | 10 | 98277860  | 98277860  | C | T | C | Y    | exonic     | TM9SF3   | missense | NM_020123:p.V487M     |
| 16461 | 10 | 104258849 | 104258849 | G | A | G | R    | intronic   | SUFU     | NA       | NA                    |
| 16461 | 10 | 108417469 | 108417469 | G | A | G | R    | exonic     | SORCS1   | silent   | NM_001013031:p.C757C  |
| 16461 | 10 | 108417470 | 108417470 | C | A | C | M    | exonic     | SORCS1   | missense | NM_001013031:p.C757F  |
| 16461 | 10 | 108456248 | 108456248 | G | T | G | K    | intronic   | SORCS1   | NA       | NA                    |
| 16461 | 10 | 108456252 | 108456252 | G | T | G | K    | intronic   | SORCS1   | NA       | NA                    |
| 16461 | 10 | 111411659 | 111411659 | C | A | C | M    | intergenic | NA       | NA       | NA                    |
| 16461 | 10 | 114053086 | 114053086 | T | A | T | W    | downstream | TECTB    | NA       | NA                    |
| 16461 | 10 | 115517207 | 115517207 | A | T | A | W    | exonic     | C10orf81 | missense | NM_001193434:p.Y25F   |

|       |    |           |           |   |   |   |      |            |          |          |                      |
|-------|----|-----------|-----------|---|---|---|------|------------|----------|----------|----------------------|
| 16461 | 10 | 116082968 | 116082968 | A | G | A | R    | splicing   | AFAP1L2  | NA       | NA                   |
| 16461 | 10 | 116909801 | 116909801 | T | A | T | W    | exonic     | ATRN1L   | nonsense | NM_207303:p.C280X    |
| 16461 | 10 | 116965629 | 116965629 | G | C | G | S    | splicing   | ATRN1L   | NA       | NA                   |
| 16461 | 10 | 117016260 | 117016260 | A | G | A | R    | intronic   | ATRN1L   | NA       | NA                   |
| 16461 | 10 | 118425906 | 118425906 | G | T | G | K    | exonic     | HSPA12A  | missense | NM_025015:p.H462N    |
| 16461 | 10 | 121746761 | 121746761 | T | C | T | Y    | intergenic | NA       | NA       | NA                   |
| 16461 | 10 | 126087538 | 126087538 | G | C | G | S    | intronic   | OAT      | NA       | NA                   |
| 16461 | 10 | 129795058 | 129795058 | G | C | G | S    | exonic     | MKI67    | missense | NM_002417:p.S1679C   |
| 16461 | 10 | 133636629 | 133636629 | G | C | G | S    | intronic   | BNIP3    | NA       | NA                   |
| 16461 | 10 | 134972884 | 134972884 | G | A | G | R    | splicing   | ZNF511   | missense | NM_145806:p.D52N     |
| 16461 | 11 | 1562768   | 1562768   | - | T | C | Y    | exonic     | KRTAP5-1 | silent   | NM_001005922:p.K96K  |
| 16461 | 11 | 3072084   | 3072084   | - | A | C | */+A | exonic     | OSBPL5   | FS_ins   | NM_145638:p.A492fs   |
| 16461 | 11 | 4572116   | 4572116   | C | A | C | M    | exonic     | OR5211   | nonsense | NM_001005169:p.S91X  |
| 16461 | 11 | 4977525   | 4977525   | A | T | A | W    | exonic     | OR51L1   | missense | NM_001004755:p.H246L |
| 16461 | 11 | 5220882   | 5220882   | G | C | G | S    | ncRNA      | HBBP1    | NA       | NA                   |
| 16461 | 11 | 7762343   | 7762343   | C | A | C | M    | intergenic | NA       | NA       | NA                   |
| 16461 | 11 | 7804134   | 7804134   | G | C | G | S    | upstream   | OR5P3    | NA       | NA                   |
| 16461 | 11 | 9563575   | 9563575   | G | C | G | S    | exonic     | WEE1     | silent   | NM_003390:p.G465G    |
| 16461 | 11 | 11934293  | 11934293  | G | T | G | K    | exonic     | USP47    | missense | NM_017944:p.D1287Y   |
| 16461 | 11 | 17126949  | 17126949  | T | A | T | W    | intronic   | PIK3C2A  | NA       | NA                   |
| 16461 | 11 | 21551487  | 21551487  | G | T | G | K    | exonic     | NELL1    | missense | NM_201551:p.V733L    |
| 16461 | 11 | 22355581  | 22355581  | G | - | T | */-G | exonic     | SLC17A6  | FS_del   | NM_020346:p.G490fs   |
| 16461 | 11 | 23457799  | 23457799  | A | T | A | W    | intergenic | NA       | NA       | NA                   |
| 16461 | 11 | 34624855  | 34624855  | G | T | G | K    | intronic   | EHF      | NA       | NA                   |
| 16461 | 11 | 36571231  | 36571231  | G | T | G | K    | exonic     | RAG2     | missense | NM_000536:p.T355N    |
| 16461 | 11 | 46647509  | 46647509  | G | C | G | S    | ncRNA      | ATG13    | NA       | NA                   |
| 16461 | 11 | 47729186  | 47729186  | A | C | A | M    | intronic   | FNBP4    | NA       | NA                   |
| 16461 | 11 | 47729390  | 47729390  | T | G | T | K    | exonic     | FNBP4    | missense | NM_015308:p.E222D    |
| 16461 | 11 | 48284924  | 48284924  | A | C | A | M    | exonic     | OR45I    | missense | NM_001004725:p.M192L |
| 16461 | 11 | 48956320  | 48956320  | C | - | T | */-C | intergenic | NA       | NA       | NA                   |
| 16461 | 11 | 49850210  | 49850210  | A | C | A | M    | intergenic | NA       | NA       | NA                   |
| 16461 | 11 | 49959805  | 49959805  | G | C | G | S    | exonic     | OR4C12   | missense | NM_001005270:p.A270G |
| 16461 | 11 | 55015121  | 55015121  | G | T | G | K    | intergenic | NA       | NA       | NA                   |
| 16461 | 11 | 55595275  | 55595275  | C | T | C | Y    | intergenic | NA       | NA       | NA                   |
| 16461 | 11 | 55661538  | 55661538  | G | T | G | K    | exonic     | OR8J3    | missense | NM_001004064:p.A78D  |
| 16461 | 11 | 55683634  | 55683634  | T | A | T | W    | exonic     | OR8K5    | missense | NM_001004058:p.T246S |
| 16461 | 11 | 55900323  | 55900323  | C | G | C | S    | exonic     | OR8U1    | silent   | NM_001013356:p.V216V |
| 16461 | 11 | 57926579  | 57926579  | C | A | C | M    | exonic     | OR5B3    | nonsense | NM_001005469:p.E294X |
| 16461 | 11 | 58031411  | 58031411  | G | C | G | S    | exonic     | OR5B21   | missense | NM_001005218:p.F248L |
| 16461 | 11 | 58980858  | 58980858  | G | A | G | R    | upstream   | OR4D6    | NA       | NA                   |
| 16461 | 11 | 59387982  | 59387982  | T | G | T | K    | exonic     | TCN1     | missense | NM_001062:p.Q78P     |
| 16461 | 11 | 60323960  | 60323960  | G | T | G | K    | UTR3       | MS4A10   | NA       | NA                   |
| 16461 | 11 | 60397536  | 60397536  | C | A | C | M    | exonic     | ZP1      | silent   | NM_207341:p.V451V    |
| 16461 | 11 | 61010377  | 61010377  | T | A | T | W    | intronic   | C11orf66 | NA       | NA                   |
| 16461 | 11 | 62117909  | 62117909  | T | A | T | W    | UTR3       | MTA2     | NA       | NA                   |
| 16461 | 11 | 63642165  | 63642165  | - | T | C | */+T | exonic     | FLRT1    | FS_ins   | NM_013280:p.P617fs   |
| 16461 | 11 | 63842333  | 63842333  | C | G | C | S    | exonic     | PRDX5    | missense | NM_181652:p.Q24E     |
| 16461 | 11 | 64426087  | 64426087  | T | C | T | Y    | exonic     | ATG2A    | missense | NM_015104:p.R1348G   |
| 16461 | 11 | 65251742  | 65251742  | C | A | C | M    | intergenic | NA       | NA       | NA                   |
| 16461 | 11 | 66015639  | 66015639  | C | G | C | S    | exonic     | DPP3     | missense | NM_130443:p.F299L    |
| 16461 | 11 | 74460155  | 74460155  | C | A | C | M    | intergenic | NA       | NA       | NA                   |
| 16461 | 11 | 74955685  | 74955685  | G | C | G | S    | intronic   | SERPINH1 | NA       | NA                   |
| 16461 | 11 | 75852423  | 75852423  | G | A | G | R    | intronic   | C11orf30 | NA       | NA                   |
| 16461 | 11 | 77602310  | 77602310  | G | T | G | K    | intronic   | USP35    | NA       | NA                   |
| 16461 | 11 | 83933858  | 83933858  | C | A | C | A    | intronic   | DLG2     | NA       | NA                   |
| 16461 | 11 | 83934280  | 83934280  | G | T | G | T    | intronic   | DLG2     | NA       | NA                   |
| 16461 | 11 | 88772732  | 88772732  | A | T | A | T    | ncRNA      | NOX4     | NA       | NA                   |
| 16461 | 11 | 88775234  | 88775234  | G | T | G | T    | exonic     | NOX4     | missense | NM_016931:p.P252T    |
| 16461 | 11 | 88863289  | 88863289  | G | C | G | C    | exonic     | NOX4     | silent   | NM_016931:p.L46L     |
| 16461 | 11 | 89318948  | 89318948  | C | A | C | M    | intergenic | NA       | NA       | NA                   |
| 16461 | 11 | 101280851 | 101280851 | A | T | A | W    | intronic   | ANGPTL5  | NA       | NA                   |
| 16461 | 11 | 107522329 | 107522329 | G | A | G | R    | intronic   | ACAT1    | NA       | NA                   |
| 16461 | 11 | 107887533 | 107887533 | T | A | T | W    | exonic     | EXPH5    | missense | NM_015065:p.E1304V   |
| 16461 | 11 | 113889189 | 113889189 | C | T | C | Y    | intergenic | NA       | NA       | NA                   |
| 16461 | 11 | 114616256 | 114616256 | C | G | C | S    | exonic     | CADM1    | silent   | NM_001098517:p.V73V  |
| 16461 | 11 | 118690452 | 118690452 | G | A | G | R    | exonic     | MCAM     | silent   | NM_006500:p.V172V    |
| 16461 | 11 | 123353389 | 123353389 | G | T | G | K    | exonic     | OR10S1   | missense | NM_001004474:p.H74N  |
| 16461 | 11 | 124989152 | 124989152 | G | C | G | S    | intronic   | STT3A    | NA       | NA                   |
| 16461 | 12 | 4504783   | 4504783   | G | A | G | R    | exonic     | C12orf4  | missense | NM_020374:p.S209L    |
| 16461 | 12 | 4579257   | 4579257   | C | G | C | S    | intronic   | DYRK4    | NA       | NA                   |
| 16461 | 12 | 8699488   | 8699488   | G | T | G | K    | intronic   | MFAP5    | NA       | NA                   |
| 16461 | 12 | 9797436   | 9797436   | A | G | A | R    | exonic     | CD69     | missense | NM_001781:p.S170P    |
| 16461 | 12 | 12868204  | 12868204  | G | C | G | S    | exonic     | DDX47    | missense | NM_016355:p.G295A    |
| 16461 | 12 | 13420340  | 13420340  | T | C | T | Y    | ncRNA      | C12orf36 | NA       | NA                   |
| 16461 | 12 | 15561045  | 15561045  | G | C | G | S    | exonic     | PTPRO    | missense | NM_002848:p.G556A    |
| 16461 | 12 | 21556459  | 21556459  | G | T | G | K    | intronic   | GOLT1B   | NA       | NA                   |
| 16461 | 12 | 21603408  | 21603408  | G | A | G | R    | intronic   | GYS2     | NA       | NA                   |
| 16461 | 12 | 32866817  | 32866817  | C | A | C | M    | exonic     | PKP2     | missense | NM_001005242:p.V564L |
| 16461 | 12 | 33030871  | 33030871  | G | C | G | S    | intergenic | NA       | NA       | NA                   |

|       |    |           |           |   |   |   |   |            |          |          |                      |
|-------|----|-----------|-----------|---|---|---|---|------------|----------|----------|----------------------|
| 16461 | 12 | 38297145  | 38297145  | T | A | T | W | exonic     | ABCD2    | missense | NM_005164:p.E344D    |
| 16461 | 12 | 46366981  | 46366981  | G | T | G | K | intronic   | RPAP3    | NA       | NA                   |
| 16461 | 12 | 49358616  | 49358616  | G | T | G | K | intronic   | DIP2B    | NA       | NA                   |
| 16461 | 12 | 49609852  | 49609852  | G | A | G | R | intronic   | METTL7A  | NA       | NA                   |
| 16461 | 12 | 51114381  | 51114381  | G | A | G | R | upstream   | KRT75    | NA       | NA                   |
| 16461 | 12 | 51196747  | 51196747  | C | A | C | M | exonic     | KRT5     | missense | NM_000424:p.K460N    |
| 16461 | 12 | 51291109  | 51291109  | G | A | G | R | intronic   | KRT73    | NA       | NA                   |
| 16461 | 12 | 51291110  | 51291110  | G | T | G | K | intronic   | KRT73    | NA       | NA                   |
| 16461 | 12 | 51631877  | 51631877  | G | A | G | R | exonic     | KRT18    | silent   | NM_199187:p.L306L    |
| 16461 | 12 | 51952848  | 51952848  | G | T | G | K | exonic     | ESPL1    | silent   | NM_012291:p.P482P    |
| 16461 | 12 | 53081991  | 53081991  | G | T | G | K | intronic   | ITGA5    | NA       | NA                   |
| 16461 | 12 | 53191940  | 53191940  | G | C | G | S | intronic   | NCKAP1L  | NA       | NA                   |
| 16461 | 12 | 56279372  | 56279372  | G | C | G | S | intronic   | PIP4K2C  | NA       | NA                   |
| 16461 | 12 | 60983021  | 60983021  | A | G | A | R | intronic   | USP15    | NA       | NA                   |
| 16461 | 12 | 61830648  | 61830648  | G | T | G | K | exonic     | AVPR1A   | missense | NM_000706:p.T79K     |
| 16461 | 12 | 63104652  | 63104652  | G | T | G | K | exonic     | XPOT     | missense | NM_007235:p.D397Y    |
| 16461 | 12 | 69342612  | 69342612  | C | T | C | Y | exonic     | PTPRR    | missense | NM_002849:p.G513E    |
| 16461 | 12 | 69573056  | 69573056  | A | T | A | W | intronic   | PTPRR    | NA       | NA                   |
| 16461 | 12 | 70236666  | 70236666  | A | G | A | R | splicing   | LGR5     | silent   | NM_003667:p.L215L    |
| 16461 | 12 | 71343082  | 71343082  | A | T | A | W | intronic   | TRHDE    | NA       | NA                   |
| 16461 | 12 | 75902637  | 75902637  | C | T | C | Y | intergenic | NA       | NA       | NA                   |
| 16461 | 12 | 81304740  | 81304740  | G | T | G | K | exonic     | C12orf26 | missense | NM_032230:p.C96F     |
| 16461 | 12 | 83791303  | 83791303  | G | T | G | K | intronic   | SLC6A15  | NA       | NA                   |
| 16461 | 12 | 87434425  | 87434425  | T | C | T | Y | intronic   | KITLG    | NA       | NA                   |
| 16461 | 12 | 92313363  | 92313363  | G | C | G | S | ncRNA      | NUDT4P1  | NA       | NA                   |
| 16461 | 12 | 94883623  | 94883623  | T | C | T | Y | exonic     | AMDHD1   | silent   | NM_152435:p.L323L    |
| 16461 | 12 | 99130248  | 99130248  | A | T | A | W | exonic     | ACTR6    | missense | NM_022496:p.D219V    |
| 16461 | 12 | 99497673  | 99497673  | G | T | G | K | intronic   | GAS2L3   | NA       | NA                   |
| 16461 | 12 | 100596168 | 100596168 | A | T | A | W | intronic   | MYBPC1   | NA       | NA                   |
| 16461 | 12 | 103183633 | 103183633 | G | T | G | K | intronic   | TXNRD1   | NA       | NA                   |
| 16461 | 12 | 104129148 | 104129148 | C | A | C | M | exonic     | APPL2    | missense | NM_018171:p.K121N    |
| 16461 | 12 | 105087976 | 105087976 | G | T | G | K | intergenic | NA       | NA       | NA                   |
| 16461 | 12 | 109359084 | 109359084 | T | G | T | K | intronic   | ARPC3    | NA       | NA                   |
| 16461 | 12 | 111224150 | 111224150 | G | C | G | S | intronic   | C12orf51 | NA       | NA                   |
| 16461 | 12 | 111330887 | 111330887 | C | G | C | S | intronic   | RPL6     | NA       | NA                   |
| 16461 | 12 | 113510481 | 113510481 | G | C | G | S | intergenic | NA       | NA       | NA                   |
| 16461 | 12 | 113510803 | 113510803 | A | T | A | W | intergenic | NA       | NA       | NA                   |
| 16461 | 12 | 113598705 | 113598705 | C | T | C | Y | intronic   | TBX3     | NA       | NA                   |
| 16461 | 12 | 116142342 | 116142342 | A | T | A | W | exonic     | NOS1     | missense | NM_000620:p.L1364H   |
| 16461 | 12 | 119919728 | 119919728 | C | A | C | M | exonic     | HNF1A    | missense | NM_000545:p.Q460K    |
| 16461 | 12 | 122836293 | 122836293 | C | T | C | Y | exonic     | DNAH10   | silent   | NM_207437:p.P365P    |
| 16461 | 12 | 122993896 | 122993896 | C | T | C | Y | exonic     | CCDC92   | silent   | NM_025140:p.T44T     |
| 16461 | 12 | 128260102 | 128260102 | T | G | T | K | exonic     | TMEM132D | missense | NM_133448:p.K453N    |
| 16461 | 12 | 129450369 | 129450369 | G | C | G | S | intronic   | RIMBP2   | NA       | NA                   |
| 16461 | 12 | 131891384 | 131891384 | C | A | C | M | exonic     | GOLGA3   | missense | NM_005895:p.D530Y    |
| 16461 | 13 | 18169121  | 18169121  | G | C | G | S | intergenic | NA       | NA       | NA                   |
| 16461 | 13 | 22803236  | 22803236  | G | A | G | R | exonic     | SACS     | missense | NM_014363:p.S4260F   |
| 16461 | 13 | 31876468  | 31876468  | C | T | C | Y | exonic     | N4BP2L1  | missense | NM_052818:p.E155K    |
| 16461 | 13 | 32225446  | 32225446  | T | A | T | W | intronic   | PDS5B    | NA       | NA                   |
| 16461 | 13 | 44068178  | 44068178  | G | T | G | K | intergenic | NA       | NA       | NA                   |
| 16461 | 13 | 44621875  | 44621875  | A | T | A | W | intronic   | GTF2F2   | NA       | NA                   |
| 16461 | 13 | 55472178  | 55472178  | G | A | G | R | intergenic | NA       | NA       | NA                   |
| 16461 | 13 | 65260247  | 65260247  | C | A | C | M | intergenic | NA       | NA       | NA                   |
| 16461 | 13 | 74953705  | 74953705  | T | C | T | Y | exonic     | TBC1D4   | missense | NM_014832:p.Q67R     |
| 16461 | 13 | 76457426  | 76457426  | A | T | A | W | intergenic | NA       | NA       | NA                   |
| 16461 | 13 | 80745213  | 80745213  | G | T | G | K | intergenic | NA       | NA       | NA                   |
| 16461 | 13 | 81162245  | 81162245  | C | A | C | M | intergenic | NA       | NA       | NA                   |
| 16461 | 13 | 85267386  | 85267386  | C | A | C | M | exonic     | SLITRK6  | missense | NM_032229:p.G420V    |
| 16461 | 13 | 87341180  | 87341180  | C | T | C | Y | intergenic | NA       | NA       | NA                   |
| 16461 | 13 | 95306460  | 95306460  | G | C | G | S | exonic     | UGGT2    | missense | NM_020121:p.L1321V   |
| 16461 | 13 | 96437900  | 96437900  | T | A | T | W | exonic     | OXGR1    | missense | NM_080818:p.I39F     |
| 16461 | 13 | 100505904 | 100505904 | A | T | A | W | intronic   | NALCN    | NA       | NA                   |
| 16461 | 14 | 19474205  | 19474205  | C | A | C | M | exonic     | OR4K1    | missense | NM_001004063:p.D180E |
| 16461 | 14 | 23690616  | 23690616  | G | T | G | K | exonic     | RNF31    | missense | NM_017999:p.R607L    |
| 16461 | 14 | 23690617  | 23690617  | G | T | G | K | exonic     | RNF31    | silent   | NM_017999:p.R607R    |
| 16461 | 14 | 35420293  | 35420293  | C | G | C | S | intergenic | NA       | NA       | NA                   |
| 16461 | 14 | 41430737  | 41430737  | C | T | C | Y | exonic     | LRFN5    | silent   | NM_152447:p.S640S    |
| 16461 | 14 | 56515326  | 56515326  | C | A | C | M | intergenic | NA       | NA       | NA                   |
| 16461 | 14 | 58860799  | 58860799  | T | A | T | W | intronic   | DAAM1    | NA       | NA                   |
| 16461 | 14 | 59934353  | 59934353  | C | T | C | Y | intergenic | NA       | NA       | NA                   |
| 16461 | 14 | 63272197  | 63272197  | A | T | A | W | intergenic | NA       | NA       | NA                   |
| 16461 | 14 | 64137330  | 64137330  | A | G | A | R | intergenic | NA       | NA       | NA                   |
| 16461 | 14 | 64803138  | 64803138  | C | T | C | Y | intergenic | NA       | NA       | NA                   |
| 16461 | 14 | 67958484  | 67958484  | C | T | C | Y | intronic   | RAD51L1  | NA       | NA                   |
| 16461 | 14 | 69514388  | 69514388  | G | A | G | R | splicing   | SMOC1    | missense | NM_022137:p.G160D    |
| 16461 | 14 | 70513373  | 70513373  | A | G | A | R | intronic   | PCNX     | NA       | NA                   |
| 16461 | 14 | 72729214  | 72729214  | C | T | C | Y | exonic     | PSEN1    | nonsense | NM_007318:p.R216X    |
| 16461 | 14 | 74671438  | 74671438  | T | G | T | K | exonic     | TMED10   | missense | NM_006827:p.Y188S    |
| 16461 | 14 | 75418848  | 75418848  | G | T | G | K | exonic     | TTL5     | missense | NM_015072:p.R1197I   |

|       |    |           |           |     |   |   |        |            |            |          |                      |
|-------|----|-----------|-----------|-----|---|---|--------|------------|------------|----------|----------------------|
| 16461 | 14 | 76562389  | 76562389  | C   | A | C | M      | exonic     | C14orf4    | silent   | NM_024496:p.L500L    |
| 16461 | 14 | 80796072  | 80796072  | G   | A | G | R      | intergenic | NA         | NA       | NA                   |
| 16461 | 14 | 91209173  | 91209173  | T   | C | T | Y      | intronic   | CATSPERB   | NA       | NA                   |
| 16461 | 14 | 95207470  | 95207470  | G   | T | G | K      | ncRNA      | TCL6       | NA       | NA                   |
| 16461 | 14 | 95207471  | 95207471  | G   | T | G | K      | ncRNA      | TCL6       | NA       | NA                   |
| 16461 | 14 | 95826750  | 95826750  | T   | C | T | Y      | intronic   | ATG2B      | NA       | NA                   |
| 16461 | 14 | 98994279  | 98994279  | A   | G | A | R      | intronic   | SETD3      | NA       | NA                   |
| 16461 | 14 | 99798580  | 99798580  | C   | G | C | S      | intronic   | YY1        | NA       | NA                   |
| 16461 | 14 | 101537217 | 101537217 | T   | A | T | W      | intronic   | DYNC1H1    | NA       | NA                   |
| 16461 | 14 | 101620547 | 101620547 | C   | T | C | Y      | exonic     | HSP90AA1   | silent   | NM_001017963:p.L485L |
| 16461 | 15 | 20809740  | 20809740  | C   | A | C | M      | ncRNA      | GOLGA8IP   | NA       | NA                   |
| 16461 | 15 | 20809741  | 20809741  | C   | A | C | M      | ncRNA      | GOLGA8IP   | NA       | NA                   |
| 16461 | 15 | 21240723  | 21240723  | C   | A | C | M      | intergenic | NA         | NA       | NA                   |
| 16461 | 15 | 23030637  | 23030637  | G   | T | G | K      | downstream | SNORD115-3 | NA       | NA                   |
| 16461 | 15 | 26184426  | 26184426  | T   | A | T | W      | exonic     | HERC2      | missense | NM_004667:p.K601N    |
| 16461 | 15 | 27313484  | 27313484  | G   | A | G | R      | intronic   | FAM189A1   | NA       | NA                   |
| 16461 | 15 | 33317055  | 33317055  | C   | G | C | S      | ncRNA      | LOC723972  | NA       | NA                   |
| 16461 | 15 | 38041418  | 38041418  | A   | G | A | R      | intronic   | EIF2AK4    | NA       | NA                   |
| 16461 | 15 | 47051742  | 47051742  | C   | A | C | M      | intergenic | NA         | NA       | NA                   |
| 16461 | 15 | 55143322  | 55143322  | G   | A | G | R      | intronic   | TCF12      | NA       | NA                   |
| 16461 | 15 | 55794084  | 55794084  | G   | C | G | S      | exonic     | GCOM1      | missense | NM_001018090:p.R523P |
| 16461 | 15 | 57950949  | 57950949  | A   | G | A | R      | intergenic | NA         | NA       | NA                   |
| 16461 | 15 | 62293196  | 62293196  | T   | A | T | W      | exonic     | CSNK1G1    | nonsense | NM_022048:p.K209X    |
| 16461 | 15 | 63281206  | 63281206  | G   | A | G | R      | intronic   | CILP       | NA       | NA                   |
| 16461 | 15 | 63473872  | 63473872  | C   | A | C | M      | exonic     | IGDCC4     | silent   | NM_020962:p.L548L    |
| 16461 | 15 | 65912577  | 65912577  | C   | A | C | M      | intronic   | SKOR1      | NA       | NA                   |
| 16461 | 15 | 70478040  | 70478040  | C   | A | C | M      | intronic   | TMEM202    | NA       | NA                   |
| 16461 | 15 | 71965957  | 71965957  | G   | C | G | S      | exonic     | TBC1D21    | missense | NM_153356:p.C243S    |
| 16461 | 15 | 78988632  | 78988632  | A   | G | A | R      | exonic     | KIAA1199   | missense | NM_018689:p.Y576C    |
| 16461 | 15 | 82572570  | 82572570  | C   | G | C | S      | ncRNA      | LOC648809  | NA       | NA                   |
| 16461 | 16 | 3718599   | 3718599   | C   | T | C | Y      | exonic     | CREBBP     | silent   | NM_004380:p.P2150P   |
| 16461 | 16 | 4812979   | 4812979   | A   | C | A | M      | intronic   | GLYR1      | NA       | NA                   |
| 16461 | 16 | 10896920  | 10896920  | C   | T | C | Y      | intronic   | CIITA      | NA       | NA                   |
| 16461 | 16 | 16080743  | 16080743  | G   | T | G | K      | exonic     | ABCC1      | silent   | NM_004996:p.V674V    |
| 16461 | 16 | 19566654  | 19566654  | G   | T | G | K      | exonic     | C16orf62   | missense | NM_020314:p.E748D    |
| 16461 | 16 | 21044014  | 21044014  | G   | C | G | S      | exonic     | DNAH3      | missense | NM_017539:p.L463V    |
| 16461 | 16 | 21180114  | 21180114  | G   | C | G | S      | exonic     | CRYM       | missense | NM_001888:p.P281R    |
| 16461 | 16 | 24073532  | 24073532  | A   | G | A | R      | exonic     | PRKCB      | silent   | NM_002738:p.T364T    |
| 16461 | 16 | 24280320  | 24280320  | G   | T | G | K      | exonic     | CACNG3     | missense | NM_006539:p.V195F    |
| 16461 | 16 | 24487776  | 24487776  | G   | T | G | K      | exonic     | RBBP6      | missense | NM_018703:p.R721L    |
| 16461 | 16 | 24488971  | 24488971  | A   | G | A | R      | exonic     | RBBP6      | silent   | NM_018703:p.E1119E   |
| 16461 | 16 | 24708867  | 24708867  | G   | C | G | S      | exonic     | TNRC6A     | missense | NM_014494:p.G468A    |
| 16461 | 16 | 28310695  | 28310695  | C   | A | C | M      | intronic   | EIF3C      | NA       | NA                   |
| 16461 | 16 | 30013604  | 30013604  | G   | A | C | R      | intronic   | YPEL3      | NA       | NA                   |
| 16461 | 16 | 30981095  | 30981095  | T   | A | T | W      | exonic     | ZNF668     | missense | NM_001172669:p.T242S |
| 16461 | 16 | 33857764  | 33857764  | C   | T | C | Y      | intergenic | NA         | NA       | NA                   |
| 16461 | 16 | 34184533  | 34184533  | G   | T | G | K      | intergenic | NA         | NA       | NA                   |
| 16461 | 16 | 44974995  | 44974995  | A   | G | A | R      | intergenic | NA         | NA       | NA                   |
| 16461 | 16 | 46679979  | 46679979  | C   | A | C | M      | exonic     | ABCC12     | silent   | NM_033226:p.G1151G   |
| 16461 | 16 | 46680023  | 46680023  | G   | T | G | K      | exonic     | ABCC12     | missense | NM_033226:p.L1137I   |
| 16461 | 16 | 60318499  | 60318499  | T   | A | T | W      | splicing   | CDH8       | missense | NM_001796:p.Q512H    |
| 16461 | 16 | 66937772  | 66937772  | G   | A | G | R      | intronic   | PRMT7      | NA       | NA                   |
| 16461 | 16 | 69512218  | 69512218  | G   | A | G | R      | exonic     | HYDIN      | missense | NM_032821:p.T2520M   |
| 16461 | 16 | 69660817  | 69660817  | G   | T | G | K      | exonic     | HYDIN      | missense | NM_001198542:p.H637N |
| 16461 | 16 | 73100338  | 73100338  | G   | A | G | R      | ncRNA      | GLG1       | NA       | NA                   |
| 16461 | 16 | 73123592  | 73123594  | AAT | - | A | */-AAT | ncRNA      | GLG1       | NA       | NA                   |
| 16461 | 17 | 3734003   | 3734003   | C   | A | C | M      | intronic   | CAMKK1     | NA       | NA                   |
| 16461 | 17 | 3926815   | 3926815   | G   | A | G | R      | intronic   | ZZEF1      | NA       | NA                   |
| 16461 | 17 | 6369402   | 6369402   | T   | C | T | Y      | exonic     | PITPNM3    | missense | NM_031220:p.Q75R     |
| 16461 | 17 | 6624493   | 6624493   | G   | T | G | K      | exonic     | FBXO39     | silent   | NM_153230:p.V194V    |
| 16461 | 17 | 7416815   | 7416815   | G   | T | G | K      | UTR5       | EIF4A1     | NA       | NA                   |
| 16461 | 17 | 7519186   | 7519186   | C   | A | C | M      | exonic     | TP53       | missense | NM_001126117:p.V25F  |
| 16461 | 17 | 10256463  | 10256463  | G   | T | G | K      | exonic     | MYH8       | silent   | NM_002472:p.P455P    |
| 16461 | 17 | 10295013  | 10295013  | T   | C | T | Y      | intronic   | MYH4       | NA       | NA                   |
| 16461 | 17 | 10348779  | 10348779  | T   | C | T | Y      | intronic   | MYH1       | NA       | NA                   |
| 16461 | 17 | 11534021  | 11534021  | G   | T | G | K      | exonic     | DNAH9      | missense | NM_001372:p.W1386L   |
| 16461 | 17 | 12596746  | 12596746  | G   | A | G | R      | exonic     | MYOCD      | silent   | NM_153604:p.P472P    |
| 16461 | 17 | 16528135  | 16528135  | C   | G | C | S      | intergenic | NA         | NA       | NA                   |
| 16461 | 17 | 18016160  | 18016160  | C   | T | C | Y      | intronic   | MYO15A     | NA       | NA                   |
| 16461 | 17 | 18579393  | 18579393  | C   | T | C | Y      | exonic     | TRIM16L    | silent   | NM_001037330:p.V314V |
| 16461 | 17 | 20219793  | 20219793  | G   | T | G | K      | ncRNA      | CCDC144C   | NA       | NA                   |
| 16461 | 17 | 22185400  | 22185400  | C   | G | C | S      | intergenic | NA         | NA       | NA                   |
| 16461 | 17 | 23991079  | 23991079  | T   | C | T | Y      | exonic     | KIAA0100   | missense | NM_014680:p.M328V    |
| 16461 | 17 | 24033061  | 24033061  | G   | T | G | K      | exonic     | SUPT6H     | missense | NM_003170:p.R511S    |
| 16461 | 17 | 24034432  | 24034432  | A   | T | A | W      | exonic     | SUPT6H     | missense | NM_003170:p.Y633F    |
| 16461 | 17 | 25536618  | 25536618  | G   | C | G | S      | exonic     | CCDC55     | missense | NM_032141:p.E493Q    |
| 16461 | 17 | 26327134  | 26327134  | T   | A | T | W      | ncRNA      | DPRXP4     | NA       | NA                   |
| 16461 | 17 | 27825015  | 27825015  | G   | A | G | R      | exonic     | PSMD11     | missense | NM_002815:p.D243N    |
| 16461 | 17 | 29390600  | 29390600  | A   | T | A | W      | intronic   | ACCN1      | NA       | NA                   |



|       |    |          |          |   |   |   |   |            |          |          |                      |
|-------|----|----------|----------|---|---|---|---|------------|----------|----------|----------------------|
| 16461 | 17 | 31185101 | 31185101 | A | G | A | R | intronic   | TAF15    | NA       | NA                   |
| 16461 | 17 | 32631619 | 32631619 | G | A | G | R | intronic   | ACACA    | NA       | NA                   |
| 16461 | 17 | 35849522 | 35849522 | G | A | G | R | intergenic | NA       | NA       | NA                   |
| 16461 | 17 | 39691226 | 39691226 | T | A | T | W | intronic   | SLC4A1   | NA       | NA                   |
| 16461 | 17 | 41472197 | 41472197 | G | A | G | R | intronic   | KIAA1267 | NA       | NA                   |
| 16461 | 17 | 43093480 | 43093480 | A | G | A | R | intronic   | KPNB1    | NA       | NA                   |
| 16461 | 17 | 46178309 | 46178309 | G | T | G | K | exonic     | LUC7L3   | missense | NM_006107:p.C308F    |
| 16461 | 17 | 53710397 | 53710397 | C | T | C | Y | exonic     | MPO      | missense | NM_000250:p.A332T    |
| 16461 | 17 | 55206031 | 55206031 | A | T | A | W | intronic   | TMEM49   | NA       | NA                   |
| 16461 | 17 | 55491720 | 55491720 | C | A | C | M | intronic   | HEATR6   | NA       | NA                   |
| 16461 | 17 | 57023200 | 57023200 | C | A | C | M | exonic     | NACA2    | missense | NM_199290:p.D42Y     |
| 16461 | 17 | 57385144 | 57385144 | T | A | T | W | exonic     | MED13    | silent   | NM_005121:p.P2027P   |
| 16461 | 17 | 59303650 | 59303650 | C | A | C | M | exonic     | CSH2     | missense | NM_022644:p.V159F    |
| 16461 | 17 | 59580000 | 59580000 | G | C | G | S | UTR3       | TEX2     | NA       | NA                   |
| 16461 | 17 | 59930000 | 59930000 | C | T | C | Y | intronic   | DDX5     | NA       | NA                   |
| 16461 | 17 | 60241598 | 60241598 | C | A | C | M | ncRNA      | PLEKHM1P | NA       | NA                   |
| 16461 | 17 | 60287476 | 60287476 | C | T | C | Y | exonic     | LRRC37A3 | missense | NM_199340:p.E1084K   |
| 16461 | 17 | 60630798 | 60630798 | G | T | G | K | exonic     | RGS9     | missense | NM_001081955:p.D371Y |
| 16461 | 17 | 63164444 | 63164444 | G | T | G | K | exonic     | NOL11    | nonsense | NM_015462:p.E475X    |
| 16461 | 17 | 64063271 | 64063271 | C | A | C | M | ncRNA      | FAM20A   | NA       | NA                   |
| 16461 | 17 | 64425087 | 64425087 | G | C | G | S | intronic   | ABCA8    | NA       | NA                   |
| 16461 | 17 | 64503782 | 64503782 | A | T | A | W | intronic   | ABCA9    | NA       | NA                   |
| 16461 | 17 | 64595099 | 64595099 | A | T | A | W | exonic     | ABCA6    | missense | NM_080284:p.I1270N   |
| 16461 | 17 | 64763274 | 64763274 | C | G | C | S | intronic   | ABCA5    | NA       | NA                   |
| 16461 | 17 | 68670906 | 68670906 | C | A | C | M | intergenic | NA       | NA       | NA                   |
| 16461 | 18 | 325206   | 325206   | C | T | C | Y | exonic     | COLEC12  | missense | NM_130386:p.R451K    |
| 16461 | 18 | 1353228  | 1353228  | A | T | A | W | intergenic | NA       | NA       | NA                   |
| 16461 | 18 | 7030175  | 7030175  | C | T | C | Y | exonic     | LAMA1    | missense | NM_005559:p.C441Y    |
| 16461 | 18 | 10614244 | 10614244 | G | C | G | S | intergenic | NA       | NA       | NA                   |
| 16461 | 18 | 14514972 | 14514972 | T | A | T | W | exonic     | POTEC    | missense | NM_001137671:p.L379F |
| 16461 | 18 | 14515086 | 14515086 | T | A | T | W | intronic   | POTEC    | NA       | NA                   |
| 16461 | 18 | 14744947 | 14744947 | C | A | C | M | exonic     | ANKRD30B | missense | NM_001145029:p.T187N |
| 16461 | 18 | 20151119 | 20151119 | C | A | C | M | exonic     | OSBPL1A  | missense | NM_080597:p.V288L    |
| 16461 | 18 | 20264297 | 20264297 | A | T | A | W | exonic     | IMPACT   | nonsense | NM_018439:p.K78X     |
| 16461 | 18 | 21060333 | 21060333 | G | A | G | R | exonic     | ZNF521   | missense | NM_015461:p.P516L    |
| 16461 | 18 | 22786215 | 22786215 | C | A | C | M | intronic   | CHST9    | NA       | NA                   |
| 16461 | 18 | 27352199 | 27352199 | G | C | G | S | splicing   | DSG2     | NA       | NA                   |
| 16461 | 18 | 32552540 | 32552540 | G | C | G | S | exonic     | FHOD3    | missense | NM_025135:p.R919P    |
| 16461 | 18 | 37871739 | 37871739 | G | T | G | K | exonic     | PIK3C3   | missense | NM_002647:p.R642L    |
| 16461 | 18 | 40155159 | 40155159 | C | G | C | S | intergenic | NA       | NA       | NA                   |
| 16461 | 18 | 40784483 | 40784483 | G | C | G | S | exonic     | SETBP1   | missense | NM_015559:p.E394Q    |
| 16461 | 18 | 45362743 | 45362743 | G | T | G | K | exonic     | LIPG     | missense | NM_006033:p.Q350H    |
| 16461 | 18 | 45820604 | 45820604 | C | G | C | S | exonic     | MYO5B    | missense | NM_001080467:p.D73H  |
| 16461 | 18 | 49230869 | 49230869 | G | A | G | R | splicing   | DCC      | silent   | NM_005215:p.E1077E   |
| 16461 | 18 | 49267252 | 49267252 | C | A | C | M | exonic     | DCC      | missense | NM_005215:p.P1275Q   |
| 16461 | 18 | 53175392 | 53175392 | T | A | T | W | exonic     | ST8SIA3  | missense | NM_015879:p.F185I    |
| 16461 | 18 | 54986817 | 54986817 | C | T | C | Y | intergenic | NA       | NA       | NA                   |
| 16461 | 18 | 55596844 | 55596844 | A | C | C | M | intergenic | NA       | NA       | NA                   |
| 16461 | 18 | 55789325 | 55789325 | C | A | C | M | intergenic | NA       | NA       | NA                   |
| 16461 | 18 | 57318660 | 57318660 | G | T | G | K | exonic     | CDH20    | missense | NM_031891:p.R202S    |
| 16461 | 18 | 66014940 | 66014940 | T | A | T | W | intronic   | RTTN     | NA       | NA                   |
| 16461 | 18 | 70374733 | 70374733 | T | A | T | W | intronic   | CNDP1    | NA       | NA                   |
| 16461 | 19 | 1779147  | 1779147  | C | G | C | S | exonic     | REXO1    | missense | NM_020695:p.R214P    |
| 16461 | 19 | 4122691  | 4122691  | G | T | G | K | exonic     | CREB3L3  | missense | NM_032607:p.V371L    |
| 16461 | 19 | 4202096  | 4202096  | A | A | G | R | exonic     | CDC94    | silent   | NM_018074:p.E66E     |
| 16461 | 19 | 11005877 | 11005877 | G | A | G | R | splicing   | SMARCA4  | NA       | NA                   |
| 16461 | 19 | 11148251 | 11148251 | G | A | G | R | intronic   | KANK2    | NA       | NA                   |
| 16461 | 19 | 15746134 | 15746134 | G | T | G | K | ncRNA      | CYP4F24P | NA       | NA                   |
| 16461 | 19 | 19683442 | 19683442 | C | T | C | Y | exonic     | ZNF14    | missense | NM_021030:p.E550K    |
| 16461 | 19 | 20781706 | 20781706 | G | T | G | K | intergenic | NA       | NA       | NA                   |
| 16461 | 19 | 22113057 | 22113057 | G | C | G | S | intergenic | NA       | NA       | NA                   |
| 16461 | 19 | 23628883 | 23628883 | T | G | T | K | exonic     | ZNF675   | missense | NM_138330:p.Q231P    |
| 16461 | 19 | 35000105 | 35000105 | A | T | A | W | intronic   | CCNE1    | NA       | NA                   |
| 16461 | 19 | 38543598 | 38543598 | T | C | T | Y | intergenic | NA       | NA       | NA                   |
| 16461 | 19 | 40445307 | 40445307 | T | G | T | K | exonic     | LSR      | missense | NM_205834:p.V265G    |
| 16461 | 19 | 41024992 | 41024992 | A | C | A | M | exonic     | NPHS1    | missense | NM_004646:p.L846R    |
| 16461 | 19 | 41054310 | 41054310 | C | T | C | Y | intronic   | APLP1    | NA       | NA                   |
| 16461 | 19 | 47258826 | 47258826 | C | A | C | M | exonic     | GRIK5    | missense | NM_002088:p.G89V     |
| 16461 | 19 | 51524411 | 51524411 | G | A | G | R | exonic     | HIF3A    | silent   | NM_022462:p.L460L    |
| 16461 | 19 | 52277392 | 52277392 | C | G | C | S | splicing   | ZC3H4    | missense | NM_015168:p.G407R    |
| 16461 | 19 | 54093046 | 54093046 | T | G | T | K | intronic   | TULP2    | NA       | NA                   |
| 16461 | 19 | 59194692 | 59194692 | G | T | G | K | intronic   | CACNG6   | NA       | NA                   |
| 16461 | 19 | 59501013 | 59501013 | C | T | C | Y | intergenic | NA       | NA       | NA                   |
| 16461 | 19 | 60389558 | 60389558 | C | A | C | M | intronic   | PTPRH    | NA       | NA                   |
| 16461 | 19 | 61447241 | 61447241 | C | T | C | Y | intergenic | NA       | NA       | NA                   |
| 16461 | 19 | 61752218 | 61752218 | A | C | A | M | exonic     | ZFP28    | silent   | NM_020828:p.I201I    |
| 16461 | 19 | 63249339 | 63249339 | G | T | G | K | intronic   | ZSCAN1   | NA       | NA                   |
| 16461 | 19 | 63542369 | 63542369 | G | C | G | S | exonic     | ZSCAN22  | missense | NM_181846:p.Q447H    |
| 16461 | 20 | 1462476  | 1462476  | G | T | G | K | downstream | SIRPD    | NA       | NA                   |

|       |    |           |           |   |   |   |   |            |           |          |                      |
|-------|----|-----------|-----------|---|---|---|---|------------|-----------|----------|----------------------|
| 16461 | 20 | 1863342   | 1863342   | G | T | G | K | intronic   | SIRPA     | NA       | NA                   |
| 16461 | 20 | 2589617   | 2589617   | T | C | T | Y | splicing   | IDH3B     | NA       | NA                   |
| 16461 | 20 | 5117719   | 5117719   | G | T | G | K | exonic     | CDS2      | missense | NM_003818:p.V330F    |
| 16461 | 20 | 5959889   | 5959889   | C | G | C | S | intronic   | CRLS1     | NA       | NA                   |
| 16461 | 20 | 8667968   | 8667968   | A | G | A | R | exonic     | PLCB1     | missense | NM_182734:p.I757V    |
| 16461 | 20 | 16440125  | 16440125  | T | G | T | K | exonic     | KIF16B    | missense | NM_001199865:p.K165T |
| 16461 | 20 | 18433507  | 18433507  | G | C | G | S | intergenic | NA        | NA       | NA                   |
| 16461 | 20 | 23306121  | 23306121  | C | T | C | Y | exonic     | NAPB      | silent   | NM_022080:p.V263V    |
| 16461 | 20 | 23514052  | 23514052  | C | T | C | Y | intergenic | NA        | NA       | NA                   |
| 16461 | 20 | 28217416  | 28217416  | G | A | G | R | intergenic | NA        | NA       | NA                   |
| 16461 | 20 | 33922483  | 33922483  | G | C | G | S | intronic   | PHF20     | NA       | NA                   |
| 16461 | 20 | 34306960  | 34306960  | G | T | G | K | exonic     | C20orf4   | missense | NM_015511:p.R345I    |
| 16461 | 20 | 34493951  | 34493951  | C | A | C | M | exonic     | DLGAP4    | silent   | NM_014902:p.I139I    |
| 16461 | 20 | 34493952  | 34493952  | C | A | C | M | exonic     | DLGAP4    | missense | NM_014902:p.R140S    |
| 16461 | 20 | 43315658  | 43315658  | G | T | G | K | exonic     | SLPI      | nonsense | NM_003064:p.C72X     |
| 16461 | 20 | 43886464  | 43886464  | A | T | A | W | intronic   | TNNC2     | NA       | NA                   |
| 16461 | 20 | 46565201  | 46565201  | C | A | C | M | intergenic | NA        | NA       | NA                   |
| 16461 | 20 | 48964036  | 48964036  | C | A | C | M | intronic   | ADNP      | NA       | NA                   |
| 16461 | 20 | 60553909  | 60553909  | C | G | C | S | ncRNA      | C20orf200 | NA       | NA                   |
| 16461 | 21 | 9738355   | 9738355   | G | A | G | R | intergenic | NA        | NA       | NA                   |
| 16461 | 21 | 10062595  | 10062595  | C | T | C | Y | intronic   | BAGE2     | NA       | NA                   |
| 16461 | 21 | 21704508  | 21704508  | G | C | G | S | exonic     | NCAM2     | missense | NM_004540:p.W413C    |
| 16461 | 21 | 33805610  | 33805610  | C | A | C | M | exonic     | GART      | missense | NM_000819:p.R711S    |
| 16461 | 21 | 33848274  | 33848274  | G | T | G | K | exonic     | SON       | missense | NM_138927:p.V1623F   |
| 16461 | 21 | 36542725  | 36542725  | A | T | A | W | exonic     | DOPEY2    | nonsense | NM_005128:p.K1663X   |
| 16461 | 21 | 36755741  | 36755741  | G | T | G | K | exonic     | CLDN14    | silent   | NM_001146078:p.L41L  |
| 16461 | 21 | 37288901  | 37288901  | G | T | G | K | intergenic | NA        | NA       | NA                   |
| 16461 | 21 | 37361501  | 37361501  | C | T | C | Y | exonic     | PIGP      | missense | NM_153681:p.G93S     |
| 16461 | 21 | 39756230  | 39756230  | G | T | G | K | exonic     | SH3BGR    | missense | NM_007341:p.K98N     |
| 16461 | 21 | 43297484  | 43297484  | T | C | T | Y | intronic   | PKNOX1    | NA       | NA                   |
| 16461 | 21 | 46905113  | 46905113  | G | T | G | K | intronic   | PRMT2     | NA       | NA                   |
| 16461 | 22 | 15452024  | 15452024  | C | T | C | Y | exonic     | CCT8L2    | missense | NM_014406:p.G473S    |
| 16461 | 22 | 15668864  | 15668864  | G | T | G | K | exonic     | XKR3      | missense | NM_175878:p.P34T     |
| 16461 | 22 | 20644762  | 20644762  | C | A | C | M | exonic     | TOP3B     | missense | NM_003935:p.V529L    |
| 16461 | 22 | 22789466  | 22789466  | G | T | G | K | exonic     | CABIN1    | nonsense | NM_001201429:p.G531X |
| 16461 | 22 | 25356230  | 25356230  | G | T | G | K | intronic   | CRYBA4    | NA       | NA                   |
| 16461 | 22 | 29251748  | 29251748  | A | C | A | M | intronic   | LOC730005 | NA       | NA                   |
| 16461 | 22 | 29882635  | 29882635  | T | C | T | Y | intergenic | NA        | NA       | NA                   |
| 16461 | 22 | 30053135  | 30053135  | C | A | C | M | exonic     | PATZ1     | missense | NM_032050:p.E556D    |
| 16461 | 22 | 35601683  | 35601683  | G | A | G | R | exonic     | NCF4      | missense | NM_000631:p.V224M    |
| 16461 | 22 | 38240008  | 38240008  | G | T | G | K | exonic     | SMCR7L    | missense | NM_019008:p.A376S    |
| 16461 | 22 | 39144993  | 39144993  | C | A | C | M | exonic     | MKL1      | silent   | NM_020831:p.T465T    |
| 16461 | 22 | 40303327  | 40303327  | G | C | G | S | exonic     | PMM1      | missense | NM_002676:p.Q244E    |
| 16461 | 22 | 42396122  | 42396122  | G | C | G | S | exonic     | EFCAB6    | missense | NM_198856:p.Q441E    |
| 16461 | X  | 2877653   | 2877653   | G | A | G | R | exonic     | ARSE      | silent   | NM_000047:p.A182A    |
| 16461 | X  | 9331684   | 9331684   | G | C | G | S | intergenic | NA        | NA       | NA                   |
| 16461 | X  | 12646460  | 12646460  | G | T | G | K | exonic     | FRMPD4    | silent   | NM_014728:p.R1198R   |
| 16461 | X  | 12727218  | 12727218  | A | T | A | W | intronic   | PRPS2     | NA       | NA                   |
| 16461 | X  | 13664642  | 13664642  | C | T | C | Y | exonic     | OFD1      | missense | NM_003611:p.A79V     |
| 16461 | X  | 16403381  | 16403381  | C | A | C | M | intergenic | NA        | NA       | NA                   |
| 16461 | X  | 27908371  | 27908371  | T | A | C | T | exonic     | DCAF8L1   | missense | NM_001017930:p.K334N |
| 16461 | X  | 36938425  | 36938425  | G | C | G | S | exonic     | FAM47C    | missense | NM_001013736:p.G674A |
| 16461 | X  | 38125576  | 38125576  | C | T | C | Y | exonic     | OTC       | silent   | NM_000531:p.T112T    |
| 16461 | X  | 48342977  | 48342977  | G | T | G | K | exonic     | WDR13     | missense | NM_017883:p.D151Y    |
| 16461 | X  | 48710599  | 48710599  | T | A | T | W | exonic     | KCND1     | missense | NM_004979:p.T342S    |
| 16461 | X  | 48955625  | 48955625  | G | T | G | T | intronic   | CACNA1F   | NA       | NA                   |
| 16461 | X  | 49284778  | 49284778  | C | T | C | Y | intergenic | NA        | NA       | NA                   |
| 16461 | X  | 50356485  | 50356485  | G | T | G | K | exonic     | SHROOM4   | missense | NM_020717:p.Q1478K   |
| 16461 | X  | 64665739  | 64665739  | C | A | C | A | intronic   | LAS1L     | NA       | NA                   |
| 16461 | X  | 65211709  | 65211709  | C | A | C | M | intergenic | NA        | NA       | NA                   |
| 16461 | X  | 70065444  | 70065444  | A | G | A | R | exonic     | SLC7A3    | silent   | NM_032803:p.A168A    |
| 16461 | X  | 71864782  | 71864782  | G | T | G | K | intergenic | NA        | NA       | NA                   |
| 16461 | X  | 77041659  | 77041659  | G | A | G | R | UTR5       | COX7B     | NA       | NA                   |
| 16461 | X  | 77799705  | 77799705  | C | A | C | M | exonic     | ZCCHC5    | missense | NM_152694:p.W290L    |
| 16461 | X  | 77799712  | 77799712  | C | A | C | M | exonic     | ZCCHC5    | nonsense | NM_152694:p.G288X    |
| 16461 | X  | 91020657  | 91020657  | G | T | G | K | exonic     | PCDH11X   | missense | NM_032969:p.W921L    |
| 16461 | X  | 101688473 | 101688473 | G | A | G | R | intergenic | NA        | NA       | NA                   |
| 16461 | X  | 102229085 | 102229085 | T | A | T | W | intronic   | NXF3      | NA       | NA                   |
| 16461 | X  | 106218548 | 106218548 | G | A | G | R | exonic     | RBM41     | missense | NM_018301:p.S234L    |
| 16461 | X  | 109584984 | 109584984 | C | A | C | M | intronic   | RGAG1     | NA       | NA                   |
| 16461 | X  | 116938320 | 116938320 | C | G | C | S | exonic     | KLHL13    | silent   | NM_033495:p.V94V     |
| 16461 | X  | 118655087 | 118655087 | T | A | T | W | exonic     | 6-Sep     | missense | NM_015129:p.E296V    |
| 16461 | X  | 120165601 | 120165601 | C | T | C | Y | intergenic | NA        | NA       | NA                   |
| 16461 | X  | 125513264 | 125513264 | C | T | C | Y | exonic     | DCAF12L1  | missense | NM_178470:p.D337N    |
| 16461 | X  | 136570854 | 136570854 | G | T | G | K | intergenic | NA        | NA       | NA                   |
| 16461 | X  | 138357289 | 138357289 | T | G | T | K | ncRNA      | SRD5A1P1  | NA       | NA                   |
| 16461 | X  | 146825743 | 146825743 | G | C | G | S | exonic     | FMR1      | silent   | NM_001185076:p.L303L |
| 16461 | Y  | 10602141  | 10602141  | T | C | T | Y | intergenic | NA        | NA       | NA                   |
| 16461 | Y  | 11701756  | 11701756  | A | G | A | R | intergenic | NA        | NA       | NA                   |

|       |   |           |           |                                 |                  |   |                                    |            |          |          |                       |
|-------|---|-----------|-----------|---------------------------------|------------------|---|------------------------------------|------------|----------|----------|-----------------------|
| 16461 | Y | 27098471  | 27098471  | T                               | C                | T | Y                                  | intergenic | NA       | NA       | NA                    |
| 16461 | Y | 27226416  | 27226416  | A                               | T                | A | W                                  | intergenic | NA       | NA       | NA                    |
| 16461 | Y | 57392535  | 57392535  | C                               | G                | C | S                                  | intergenic | NA       | NA       | NA                    |
| 16617 | 1 | 32430800  | 32430800  | C                               | T                | C | Y                                  | intronic   | TXLNA    | NA       | NA                    |
| 16617 | 1 | 37812682  | 37812682  | G                               | C                | G | S                                  | intronic   | GNL2     | NA       | NA                    |
| 16617 | 1 | 41821668  | 41821668  | T                               | G                | T | K                                  | exonic     | HIVEP3   | missense | NM_001127714:p.E463A  |
| 16617 | 1 | 47173858  | 47173858  | G                               | A                | G | R                                  | exonic     | CYP4A11  | nonsense | NM_000778:p.Q187X     |
| 16617 | 1 | 70769120  | 70769120  | G                               | T                | G | K                                  | intergenic | NA       | NA       | NA                    |
| 16617 | 1 | 100406606 | 100406606 | C                               | T                | C | Y                                  | exonic     | LRRC39   | missense | NM_144620:p.E19K      |
| 16617 | 1 | 103236488 | 103236488 | C                               | A                | C | M                                  | exonic     | COL11A1  | missense | NM_001854:p.G721V     |
| 16617 | 1 | 141482698 | 141482698 | G                               | C                | G | S                                  | intergenic | NA       | NA       | NA                    |
| 16617 | 1 | 142292946 | 142292946 | A                               | T                | A | W                                  | intergenic | NA       | NA       | NA                    |
| 16617 | 1 | 142356015 | 142356015 | G                               | T                | G | K                                  | intergenic | NA       | NA       | NA                    |
| 16617 | 1 | 142356032 | 142356032 | A                               | T                | A | W                                  | intergenic | NA       | NA       | NA                    |
| 16617 | 1 | 143241086 | 143241086 | T                               | A                | T | W                                  | intergenic | NA       | NA       | NA                    |
| 16617 | 1 | 156565858 | 156565858 | T                               | A                | T | W                                  | exonic     | CD1B     | missense | NM_001764:p.D271V     |
| 16617 | 1 | 156657089 | 156657089 | G                               | A                | G | R                                  | exonic     | OR10K2   | silent   | NM_001004476:p.A64A   |
| 16617 | 1 | 156881950 | 156881950 | C                               | T                | C | Y                                  | exonic     | SPTA1    | missense | NM_003126:p.E1319K    |
| 16617 | 1 | 166536383 | 166536383 | C                               | T                | C | Y                                  | intronic   | TBX19    | NA       | NA                    |
| 16617 | 1 | 174975854 | 174975854 | C                               | G                | C | S                                  | exonic     | PAPPA2   | silent   | NM_020318:p.V1350V    |
| 16617 | 1 | 184548621 | 184548621 | C                               | T                | C | Y                                  | exonic     | PRG4     | silent   | NM_001127708:p.D1322D |
| 16617 | 1 | 195337089 | 195337089 | T                               | A                | T | W                                  | exonic     | ASPM     | nonsense | NM_018136:p.K2639X    |
| 16617 | 1 | 198281307 | 198281307 | A                               | G                | A | R                                  | exonic     | NR5A2    | silent   | NM_205860:p.K145K     |
| 16617 | 1 | 218377954 | 218377954 | C                               | T                | C | Y                                  | exonic     | IARS2    | silent   | NM_018060:p.T707T     |
| 16617 | 1 | 245460412 | 245460412 | T                               | C                | T | Y                                  | intergenic | NA       | NA       | NA                    |
| 16617 | 2 | 11307258  | 11307258  | T                               | C                | T | Y                                  | exonic     | ROCK2    | missense | NM_004850:p.N148D     |
| 16617 | 2 | 27276840  | 27276840  | A                               | C                | A | M                                  | exonic     | SLC5A6   | missense | NM_021095:p.S626A     |
| 16617 | 2 | 32280301  | 32280301  | C                               | T                | C | Y                                  | intronic   | SLC30A6  | NA       | NA                    |
| 16617 | 2 | 48439760  | 48439760  | A                               | T                | A | W                                  | exonic     | FOXN2    | missense | NM_002158:p.K203M     |
| 16617 | 2 | 58215900  | 58215900  | T                               | C                | T | Y                                  | ncRNA      | VRK2     | NA       | NA                    |
| 16617 | 2 | 85835517  | 85835517  | A                               | G                | A | R                                  | exonic     | ATOH8    | missense | NM_032827:p.R232G     |
| 16617 | 2 | 88206719  | 88206719  | G                               | T                | G | K                                  | intronic   | FABP1    | NA       | NA                    |
| 16617 | 2 | 91434890  | 91434890  | T                               | G                | T | K                                  | intergenic | NA       | NA       | NA                    |
| 16617 | 2 | 100947066 | 100947066 | T                               | A                | T | W                                  | exonic     | NPAS2    | nonsense | NM_002518:p.L238X     |
| 16617 | 2 | 131131028 | 131131028 | G                               | A                | G | R                                  | intergenic | NA       | NA       | NA                    |
| 16617 | 2 | 132791339 | 132791339 | G                               | T                | G | K                                  | intergenic | NA       | NA       | NA                    |
| 16617 | 2 | 136105909 | 136105909 | G                               | C                | G | S                                  | exonic     | R3HDM1   | missense | NM_015361:p.R189P     |
| 16617 | 2 | 144873038 | 144873038 | G                               | C                | G | S                                  | exonic     | ZEB2     | missense | NM_014795:p.P729R     |
| 16617 | 2 | 202406943 | 202406943 | A                               | G                | A | R                                  | intronic   | CDK15    | NA       | NA                    |
| 16617 | 2 | 211164895 | 211164895 | G                               | T                | G | K                                  | exonic     | CPS1     | missense | NM_001122633:p.G354V  |
| 16617 | 3 | 12856778  | 12856778  | C                               | T                | C | Y                                  | UTR5       | RPL32    | NA       | NA                    |
| 16617 | 3 | 23087960  | 23087960  | C                               | G                | C | S                                  | intergenic | NA       | NA       | NA                    |
| 16617 | 3 | 99334527  | 99334527  | T                               | C                | T | Y                                  | exonic     | OR5H1    | missense | NM_001005338:p.I99T   |
| 16617 | 3 | 102446147 | 102446147 | G                               | A                | G | R                                  | exonic     | IMPG2    | missense | NM_016247:p.T573I     |
| 16617 | 3 | 140148040 | 140148055 | TCCGCG<br>CTCTCG<br>CGGA        | -<br>-<br>CGGA   | C | */-<br>TCCGCGCTC<br>TCCGCGGA       | exonic     | FOXL2    | FS_del   | NM_023067:p.67_72del  |
| 16617 | 3 | 147271793 | 147271793 | T                               | A                | T | W                                  | exonic     | PLOD2    | silent   | NM_182943:p.A652A     |
| 16617 | 3 | 168665965 | 168665965 | T                               | A                | T | W                                  | exonic     | SERPINI2 | missense | NM_006217:p.K223N     |
| 16617 | 3 | 196880470 | 196880470 | A                               | T                | A | W                                  | ncRNA      | SDHAP2   | NA       | NA                    |
| 16617 | 4 | 55676044  | 55676044  | T                               | A                | T | W                                  | intronic   | KDR      | NA       | NA                    |
| 16617 | 4 | 83566334  | 83566334  | A                               | T                | A | W                                  | ncRNA      | HNRPDL   | NA       | NA                    |
| 16617 | 4 | 121835700 | 121835700 | T                               | A                | T | W                                  | UTR3       | PRDM5    | NA       | NA                    |
| 16617 | 4 | 124166020 | 124166020 | A                               | G                | A | R                                  | intronic   | SPATA5   | NA       | NA                    |
| 16617 | 4 | 163174261 | 163174261 | C                               | A                | C | M                                  | splicing   | FSTL5    | NA       | NA                    |
| 16617 | 4 | 176793270 | 176793270 | G                               | A                | G | R                                  | intronic   | GPM6A    | NA       | NA                    |
| 16617 | 5 | 1625275   | 1625275   | A                               | G                | A | R                                  | ncRNA      | SDHAP3   | NA       | NA                    |
| 16617 | 5 | 10455101  | 10455119  | TAATAT<br>GGGAAA<br>ACCGGG<br>G | -<br>-<br>-<br>G | T | */-<br>TAATATGG<br>GAAAACCG<br>GGG | intronic   | 6-Mar    | NA       | NA                    |
| 16617 | 5 | 29038322  | 29038322  | C                               | T                | C | Y                                  | intergenic | NA       | NA       | NA                    |
| 16617 | 5 | 36147118  | 36147118  | C                               | A                | C | M                                  | splicing   | LMBRD2   | NA       | NA                    |
| 16617 | 5 | 50156603  | 50156603  | A                               | G                | A | R                                  | intronic   | PARP8    | NA       | NA                    |
| 16617 | 5 | 56650202  | 56650202  | A                               | C                | A | M                                  | intergenic | NA       | NA       | NA                    |
| 16617 | 5 | 96258427  | 96258427  | T                               | A                | T | W                                  | intronic   | ERAP2    | NA       | NA                    |
| 16617 | 5 | 102277530 | 102277530 | G                               | C                | G | S                                  | ncRNA      | PAM      | NA       | NA                    |
| 16617 | 5 | 133320373 | 133320373 | -                               | C                | A | */+C                               | UTR3       | C5orf15  | NA       | NA                    |
| 16617 | 5 | 133320374 | 133320374 | T                               | G                | T | K                                  | UTR3       | C5orf15  | NA       | NA                    |
| 16617 | 6 | 30274486  | 30274486  | C                               | A                | C | M                                  | exonic     | TRIM26   | missense | NM_003449:p.R125L     |
| 16617 | 6 | 31791140  | 31791140  | T                               | C                | T | Y                                  | exonic     | LY6G6D   | missense | NM_021246:p.L10P      |
| 16617 | 6 | 46785140  | 46785140  | T                               | G                | T | K                                  | intronic   | PLA2G7   | NA       | NA                    |
| 16617 | 6 | 46942841  | 46942841  | G                               | C                | G | S                                  | intronic   | GPR116   | NA       | NA                    |
| 16617 | 6 | 51510127  | 51510127  | G                               | C                | G | S                                  | intergenic | NA       | NA       | NA                    |
| 16617 | 6 | 88051226  | 88051226  | G                               | C                | G | S                                  | exonic     | GJB7     | missense | NM_198568:p.H42D      |
| 16617 | 6 | 108325572 | 108325572 | C                               | T                | C | Y                                  | exonic     | SEC63    | missense | NM_007214:p.V472I     |
| 16617 | 6 | 110863771 | 110863771 | A                               | G                | A | R                                  | exonic     | SLC22A16 | silent   | NM_033125:p.A466A     |
| 16617 | 6 | 126122542 | 126122542 | G                               | A                | G | R                                  | exonic     | HEY2     | silent   | NM_012259:p.P305P     |

|       |    |           |           |   |   |   |      |            |            |          |                      |
|-------|----|-----------|-----------|---|---|---|------|------------|------------|----------|----------------------|
| 16617 | 6  | 130412550 | 130412550 | A | T | A | W    | intronic   | L3MBTL3    | NA       | NA                   |
| 16617 | 6  | 132659937 | 132659937 | G | A | G | R    | UTR3       | MOXD1      | NA       | NA                   |
| 16617 | 6  | 133873277 | 133873277 | A | - | T | *-/A | intronic   | EYA4       | NA       | NA                   |
| 16617 | 6  | 144220906 | 144220906 | G | T | G | K    | intronic   | LTV1       | NA       | NA                   |
| 16617 | 6  | 155195790 | 155195790 | C | T | C | Y    | exonic     | SCAF8      | nonsense | NM_014892:p.R1129X   |
| 16617 | 7  | 8061515   | 8061515   | A | G | A | R    | intronic   | GLCC1      | NA       | NA                   |
| 16617 | 7  | 15391497  | 15391497  | C | A | C | M    | intronic   | AGMO       | NA       | NA                   |
| 16617 | 7  | 21226861  | 21226861  | T | C | T | Y    | intergenic | NA         | NA       | NA                   |
| 16617 | 7  | 44128255  | 44128255  | C | T | C | Y    | UTR5       | POLD2      | NA       | NA                   |
| 16617 | 7  | 47665246  | 47665246  | A | G | A | R    | exonic     | C7orf65    | silent   | NM_001123065:p.L117L |
| 16617 | 7  | 56632986  | 56632986  | G | A | G | R    | intergenic | NA         | NA       | NA                   |
| 16617 | 7  | 61463276  | 61463276  | G | A | G | R    | intergenic | NA         | NA       | NA                   |
| 16617 | 7  | 72735092  | 72735092  | C | G | C | S    | exonic     | DNAJC30    | missense | NM_032317:p.G200R    |
| 16617 | 7  | 81473027  | 81473027  | G | A | G | R    | exonic     | CACNA2D1   | missense | NM_000722:p.P502L    |
| 16617 | 7  | 93876622  | 93876622  | G | T | G | K    | exonic     | COL1A2     | missense | NM_000089:p.R282L    |
| 16617 | 7  | 106297104 | 106297104 | C | A | C | M    | exonic     | PIK3CG     | missense | NM_002649:p.A621D    |
| 16617 | 7  | 107610338 | 107610338 | G | A | G | R    | intronic   | NRCAM      | NA       | NA                   |
| 16617 | 7  | 137739663 | 137739663 | G | A | G | R    | intergenic | NA         | NA       | NA                   |
| 16617 | 7  | 158517301 | 158517301 | G | A | G | R    | exonic     | VIPR2      | silent   | NM_003382:p.L374L    |
| 16617 | 8  | 51837506  | 51837506  | G | A | G | R    | intronic   | SNTG1      | NA       | NA                   |
| 16617 | 8  | 95243463  | 95243463  | A | G | A | R    | intronic   | CDH17      | NA       | NA                   |
| 16617 | 8  | 107779173 | 107779173 | C | G | C | S    | intronic   | OXR1       | NA       | NA                   |
| 16617 | 8  | 108403416 | 108403416 | T | C | T | Y    | exonic     | ANGPT1     | missense | NM_001199859:p.Q231R |
| 16617 | 9  | 4771630   | 4771630   | C | T | C | Y    | intergenic | NA         | NA       | NA                   |
| 16617 | 9  | 13112126  | 13112126  | C | A | C | M    | exonic     | MPDZ       | missense | NM_003829:p.C1666F   |
| 16617 | 9  | 15715032  | 15715032  | A | C | A | M    | intronic   | C9orf93    | NA       | NA                   |
| 16617 | 9  | 67806089  | 67806089  | G | T | G | K    | intergenic | NA         | NA       | NA                   |
| 16617 | 9  | 67907336  | 67907336  | C | T | C | Y    | intergenic | NA         | NA       | NA                   |
| 16617 | 9  | 67908186  | 67908186  | A | G | A | R    | intergenic | NA         | NA       | NA                   |
| 16617 | 9  | 67914279  | 67914279  | C | G | C | S    | intergenic | NA         | NA       | NA                   |
| 16617 | 9  | 67915331  | 67915331  | A | T | A | W    | intergenic | NA         | NA       | NA                   |
| 16617 | 9  | 85448342  | 85448342  | A | T | A | W    | exonic     | C9orf103   | missense | NM_001001551:p.I131F |
| 16617 | 9  | 89687793  | 89687793  | G | T | G | K    | exonic     | C9orf79    | missense | NM_178828:p.W56L     |
| 16617 | 9  | 127737658 | 127737658 | A | T | A | W    | exonic     | PBX3       | missense | NM_001134778:p.E190V |
| 16617 | 10 | 24842169  | 24842169  | G | A | G | R    | intronic   | KIAA1217   | NA       | NA                   |
| 16617 | 10 | 28937067  | 28937067  | G | T | G | K    | ncRNA      | WAC        | NA       | NA                   |
| 16617 | 10 | 42066487  | 42066487  | G | T | G | K    | intergenic | NA         | NA       | NA                   |
| 16617 | 10 | 42066488  | 42066488  | G | T | G | K    | intergenic | NA         | NA       | NA                   |
| 16617 | 10 | 45227591  | 45227591  | G | A | G | R    | intronic   | ALOX5      | NA       | NA                   |
| 16617 | 10 | 49056122  | 49056122  | C | T | C | Y    | exonic     | FRMPD2     | missense | NM_001018071:p.D957N |
| 16617 | 10 | 59824794  | 59824794  | G | T | G | K    | exonic     | TFAM       | missense | NM_003201:p.R232L    |
| 16617 | 10 | 68649635  | 68649635  | C | A | C | M    | splicing   | CTNNA3     | NA       | NA                   |
| 16617 | 10 | 114891046 | 114891046 | C | T | C | Y    | exonic     | TCF7L2     | silent   | NM_001146286:p.A199A |
| 16617 | 10 | 127833864 | 127833864 | T | A | T | W    | splicing   | ADAM12     | missense | NM_021641:p.E87D     |
| 16617 | 10 | 135008415 | 135008415 | A | C | A | M    | intergenic | NA         | NA       | NA                   |
| 16617 | 11 | 2996954   | 2996954   | T | G | T | K    | exonic     | CARS       | silent   | NM_139273:p.A379A    |
| 16617 | 11 | 5419293   | 5419293   | G | T | G | K    | exonic     | OR5111     | missense | NM_001005288:p.Q10K  |
| 16617 | 11 | 18849880  | 18849880  | A | T | A | W    | intergenic | NA         | NA       | NA                   |
| 16617 | 11 | 54867993  | 54867993  | C | A | C | M    | exonic     | OR4A16     | silent   | NM_001005274:p.L247L |
| 16617 | 11 | 56267559  | 56267559  | G | A | G | R    | exonic     | OR9G4      | missense | NM_001005284:p.S102L |
| 16617 | 11 | 57183674  | 57183674  | C | T | C | Y    | exonic     | CLP1       | silent   | NM_001142597:p.T50T  |
| 16617 | 11 | 108316485 | 108316485 | G | T | G | K    | UTR3       | DDX10      | NA       | NA                   |
| 16617 | 11 | 123316376 | 123316376 | G | C | G | S    | exonic     | OR4D5      | missense | NM_001001965:p.M281I |
| 16617 | 11 | 127316546 | 127316546 | C | T | C | Y    | intergenic | NA         | NA       | NA                   |
| 16617 | 12 | 28608837  | 28608837  | A | G | A | R    | intergenic | NA         | NA       | NA                   |
| 16617 | 12 | 75776809  | 75776809  | G | T | G | K    | UTR3       | CSRP2      | NA       | NA                   |
| 16617 | 12 | 78362338  | 78362338  | G | C | G | S    | intronic   | SYT1       | NA       | NA                   |
| 16617 | 12 | 94953474  | 94953474  | A | G | A | R    | UTR5       | LTA4H      | NA       | NA                   |
| 16617 | 12 | 101812828 | 101812828 | T | - | C | *-/T | splicing   | PAH        | NA       | NA                   |
| 16617 | 12 | 102646776 | 102646776 | A | C | A | M    | exonic     | STAB2      | missense | NM_017564:p.Y1652S   |
| 16617 | 12 | 118117202 | 118117202 | G | A | G | R    | downstream | HSPB8      | NA       | NA                   |
| 16617 | 13 | 18138706  | 18138706  | C | G | C | S    | intergenic | NA         | NA       | NA                   |
| 16617 | 13 | 25002190  | 25002190  | T | A | T | W    | exonic     | ATP8A2     | missense | NM_016529:p.I92N     |
| 16617 | 13 | 52522488  | 52522488  | C | G | C | S    | exonic     | OLFM4      | missense | NM_006418:p.R372G    |
| 16617 | 13 | 66739094  | 66739094  | C | G | C | S    | intergenic | NA         | NA       | NA                   |
| 16617 | 13 | 74710831  | 74710831  | G | T | G | K    | ncRNA      | CTAGE11P   | NA       | NA                   |
| 16617 | 13 | 77225321  | 77225321  | A | T | A | W    | intronic   | SLAIN1     | NA       | NA                   |
| 16617 | 13 | 91143517  | 91143517  | C | - | G | *-/C | exonic     | GPC5       | FS_del   | NM_004466:p.A134fs   |
| 16617 | 13 | 91143518  | 91143518  | C | A | C | M    | exonic     | GPC5       | silent   | NM_004466:p.A134A    |
| 16617 | 13 | 107753734 | 107753734 | C | G | C | S    | intronic   | TNFSF13B   | NA       | NA                   |
| 16617 | 13 | 113355457 | 113355457 | C | - | G | *-/C | intronic   | ATP4B      | NA       | NA                   |
| 16617 | 14 | 44400610  | 44400610  | G | A | G | R    | intergenic | NA         | NA       | NA                   |
| 16617 | 14 | 46635968  | 46635968  | G | T | G | K    | exonic     | MDGA2      | missense | NM_001113498:p.T345N |
| 16617 | 14 | 55209067  | 55209067  | T | G | T | K    | intronic   | KTN1       | NA       | NA                   |
| 16617 | 14 | 77106653  | 77106653  | G | A | G | R    | intronic   | SPTLC2     | NA       | NA                   |
| 16617 | 14 | 93122988  | 93122988  | G | T | G | K    | exonic     | KIAA1409   | missense | NM_020818:p.D828Y    |
| 16617 | 14 | 94630295  | 94630295  | C | T | C | Y    | intronic   | DICER1     | NA       | NA                   |
| 16617 | 15 | 22973132  | 22973132  | C | A | C | M    | ncRNA      | SNORD115-4 | NA       | NA                   |
| 16617 | 15 | 27185041  | 27185041  | G | A | G | R    | exonic     | APBA2      | silent   | NM_001130414:p.E552E |

|       |    |           |           |   |   |   |      |            |            |          |                      |
|-------|----|-----------|-----------|---|---|---|------|------------|------------|----------|----------------------|
| 16617 | 15 | 39310060  | 39310060  | G | A | G | R    | UTR5       | EXD1       | NA       | NA                   |
| 16617 | 15 | 39921715  | 39921715  | G | T | G | K    | exonic     | JMJD7-PLA2 | (silent  | NM_001198588:p.L449L |
| 16617 | 15 | 43510258  | 43510258  | A | G | A | R    | splicing   | C15orf48   | NA       | NA                   |
| 16617 | 15 | 46542699  | 46542699  | T | A | T | W    | exonic     | FBN1       | missense | NM_000138:p.Y1699F   |
| 16617 | 15 | 62944131  | 62944131  | T | C | T | Y    | intronic   | PLEKHO2    | NA       | NA                   |
| 16617 | 15 | 68930954  | 68930954  | G | A | G | R    | UTR3       | LARP6      | NA       | NA                   |
| 16617 | 15 | 72705392  | 72705392  | G | C | G | S    | intronic   | CLK3       | NA       | NA                   |
| 16617 | 15 | 72892341  | 72892341  | C | T | C | Y    | exonic     | LMAN1L     | silent   | NM_021819:p.R31R     |
| 16617 | 15 | 94732877  | 94732877  | G | A | G | R    | intergenic | NA         | NA       | NA                   |
| 16617 | 16 | 21752     | 21752     | C | T | C | Y    | intergenic | NA         | NA       | NA                   |
| 16617 | 16 | 2290070   | 2290070   | G | T | G | K    | exonic     | ABCA3      | missense | NM_001089:p.N516K    |
| 16617 | 16 | 24099782  | 24099782  | G | A | G | R    | intronic   | PRKCB      | NA       | NA                   |
| 16617 | 16 | 34196086  | 34196086  | G | T | G | K    | intergenic | NA         | NA       | NA                   |
| 16617 | 16 | 57095859  | 57095859  | C | T | C | Y    | intronic   | NDRG4      | NA       | NA                   |
| 16617 | 16 | 60318560  | 60318560  | T | A | T | W    | exonic     | CDH8       | missense | NM_001796:p.N492I    |
| 16617 | 16 | 62852177  | 62852177  | A | G | A | R    | intergenic | NA         | NA       | NA                   |
| 16617 | 16 | 65976531  | 65976531  | A | G | A | R    | UTR3       | LRRC36     | NA       | NA                   |
| 16617 | 16 | 69058334  | 69058334  | C | T | C | Y    | exonic     | FUK        | silent   | NM_145059:p.L154L    |
| 16617 | 16 | 75955576  | 75955576  | C | T | C | Y    | intronic   | ADAMTS18   | NA       | NA                   |
| 16617 | 16 | 80460422  | 80460422  | G | T | G | K    | intronic   | PLCG2      | NA       | NA                   |
| 16617 | 16 | 88363855  | 88363855  | G | C | G | S    | exonic     | FANCA      | missense | NM_000135:p.P799A    |
| 16617 | 17 | 5300126   | 5300126   | T | C | T | Y    | exonic     | DHX33      | missense | NM_020162:p.D317G    |
| 16617 | 17 | 7857117   | 7857117   | C | A | C | M    | intronic   | GUCY2D     | NA       | NA                   |
| 16617 | 17 | 10381529  | 10381529  | T | A | T | W    | exonic     | MYH2       | missense | NM_017534:p.D548V    |
| 16617 | 17 | 16796599  | 16796599  | C | T | C | Y    | exonic     | TNFRSF13B  | missense | NM_012452:p.V29M     |
| 16617 | 17 | 22290561  | 22290561  | T | C | T | Y    | intergenic | NA         | NA       | NA                   |
| 16617 | 17 | 22304092  | 22304092  | T | C | T | Y    | intergenic | NA         | NA       | NA                   |
| 16617 | 17 | 36111661  | 36111661  | A | C | A | M    | exonic     | KRT24      | missense | NM_019016:p.N222K    |
| 16617 | 17 | 50439879  | 50439879  | C | G | C | S    | exonic     | STXBP4     | silent   | NM_178509:p.A196A    |
| 16617 | 17 | 55697637  | 55697637  | G | C | G | S    | intronic   | USP32      | NA       | NA                   |
| 16617 | 17 | 59129741  | 59129741  | A | C | A | M    | exonic     | LIMD2      | missense | NM_030576:p.F96C     |
| 16617 | 18 | 16771423  | 16771423  | T | G | T | K    | intergenic | NA         | NA       | NA                   |
| 16617 | 18 | 16773121  | 16773121  | A | C | A | M    | intergenic | NA         | NA       | NA                   |
| 16617 | 18 | 16953349  | 16953349  | C | G | C | S    | intergenic | NA         | NA       | NA                   |
| 16617 | 18 | 37874715  | 37874715  | A | G | A | R    | intronic   | PIK3C3     | NA       | NA                   |
| 16617 | 18 | 43410403  | 43410403  | C | T | C | Y    | intergenic | NA         | NA       | NA                   |
| 16617 | 19 | 11455530  | 11455530  | C | A | C | M    | exonic     | ZNF653     | silent   | NM_138783:p.T605T    |
| 16617 | 19 | 14134628  | 14134628  | C | T | C | Y    | exonic     | LPHN1      | missense | NM_014921:p.D329N    |
| 16617 | 19 | 16133345  | 16133345  | C | T | C | Y    | intronic   | CIB3       | NA       | NA                   |
| 16617 | 19 | 22155590  | 22155590  | C | A | C | M    | exonic     | ZNF676     | nonsense | NM_001001411:p.E257X |
| 16617 | 19 | 40710834  | 40710834  | C | A | C | M    | exonic     | SBSN       | nonsense | NM_198538:p.E64X     |
| 16617 | 19 | 40710835  | 40710835  | C | A | C | M    | exonic     | SBSN       | missense | NM_198538:p.R63S     |
| 16617 | 19 | 59976907  | 59976907  | C | T | C | Y    | intronic   | KIR2DL1    | NA       | NA                   |
| 16617 | 19 | 63681076  | 63681076  | G | C | G | S    | intronic   | ZNF446     | NA       | NA                   |
| 16617 | 20 | 1565072   | 1565072   | G | T | G | K    | exonic     | SIRPG      | silent   | NM_018556:p.S170S    |
| 16617 | 20 | 28260020  | 28260020  | G | A | G | R    | intergenic | NA         | NA       | NA                   |
| 16617 | 20 | 41646822  | 41646822  | C | A | C | M    | intronic   | SGK2       | NA       | NA                   |
| 16617 | 20 | 50202217  | 50202217  | C | A | C | M    | exonic     | ZFP64      | missense | NM_018197:p.A641S    |
| 16617 | 21 | 42284900  | 42284900  | G | A | G | R    | exonic     | ZNF295     | missense | NM_001098403:p.R591W |
| 16617 | 22 | 23661202  | 23661202  | C | T | C | Y    | downstream | TMEM211    | NA       | NA                   |
| 16617 | 22 | 31322575  | 31322575  | G | C | G | S    | intronic   | SYN3       | NA       | NA                   |
| 16617 | 22 | 35202864  | 35202864  | A | C | A | M    | intronic   | TXN2       | NA       | NA                   |
| 16617 | 22 | 40937196  | 40937196  | C | G | C | S    | exonic     | TCF20      | missense | NM_005650:p.A1354P   |
| 16617 | 22 | 44063600  | 44063600  | T | C | T | Y    | intronic   | UPK3A      | NA       | NA                   |
| 16617 | X  | 3250170   | 3250170   | G | C | G | S    | exonic     | MXRA5      | missense | NM_015419:p.Q1186E   |
| 16617 | X  | 11228635  | 11228635  | C | G | C | S    | intronic   | AMELX      | NA       | NA                   |
| 16617 | X  | 16797274  | 16797274  | G | A | G | R    | intronic   | RBBP7      | NA       | NA                   |
| 16617 | X  | 17681487  | 17681487  | T | C | T | Y    | UTR3       | SCML1      | NA       | NA                   |
| 16617 | X  | 21425891  | 21425891  | T | G | T | K    | intronic   | CNKSR2     | NA       | NA                   |
| 16617 | X  | 21779645  | 21779645  | C | T | C | Y    | exonic     | MBTPS2     | missense | NM_015884:p.A179V    |
| 16617 | X  | 31074498  | 31074498  | A | G | A | R    | intronic   | DMD        | NA       | NA                   |
| 16617 | X  | 48549887  | 48549887  | C | A | C | M    | intronic   | HDAC6      | NA       | NA                   |
| 16617 | X  | 49025509  | 49025509  | T | C | T | Y    | intronic   | PPP1R3F    | NA       | NA                   |
| 16617 | X  | 63405247  | 63405247  | C | T | C | Y    | exonic     | MTMR8      | silent   | NM_017677:p.L670L    |
| 16617 | X  | 69395783  | 69395783  | G | A | G | R    | exonic     | P2RY4      | silent   | NM_002565:p.H139H    |
| 16617 | X  | 75471812  | 75471812  | C | A | C | M    | intergenic | NA         | NA       | NA                   |
| 16617 | X  | 77175949  | 77175949  | C | - | T | */-C | exonic     | ATP7A      | FS_del   | NM_000052:p.S1162fs  |
| 16617 | X  | 77175950  | 77175950  | C | T | C | Y    | exonic     | ATP7A      | silent   | NM_000052:p.S1162S   |
| 16617 | X  | 77280932  | 77280932  | T | C | T | Y    | intronic   | TAF9B      | NA       | NA                   |
| 16617 | X  | 78102884  | 78102884  | A | G | A | R    | exonic     | P2RY10     | missense | NM_014499:p.I71V     |
| 16617 | X  | 89181920  | 89181920  | A | T | A | W    | intergenic | NA         | NA       | NA                   |
| 16617 | X  | 92363894  | 92363894  | G | T | G | K    | intergenic | NA         | NA       | NA                   |
| 16617 | X  | 100516427 | 100516427 | A | T | A | W    | intronic   | BTK        | NA       | NA                   |
| 16617 | X  | 128410003 | 128410003 | A | C | A | M    | exonic     | SMARCA1    | silent   | NM_003069:p.T1043T   |
| 16617 | X  | 135717417 | 135717417 | T | G | T | K    | intergenic | NA         | NA       | NA                   |
| 16617 | X  | 138684608 | 138684608 | C | A | C | M    | exonic     | ATP11C     | missense | NM_173694:p.S711I    |
| 16617 | M  | 1989      | 1989      | G | A | G | R    | intergenic | NA         | NA       | NA                   |
| 16617 | M  | 12773     | 12773     | G | A | G | R    | intergenic | NA         | NA       | NA                   |
| 16989 | 1  | 27748721  | 27748721  | C | A | C | M    | exonic     | AHDC1      | missense | NM_001029882:p.E831D |

|       |    |           |           |   |   |   |      |            |          |          |                      |
|-------|----|-----------|-----------|---|---|---|------|------------|----------|----------|----------------------|
| 16989 | 1  | 76938163  | 76938163  | G | T | G | K    | intergenic | NA       | NA       | NA                   |
| 16989 | 1  | 141481015 | 141481015 | T | C | T | Y    | intergenic | NA       | NA       | NA                   |
| 16989 | 1  | 151579523 | 151579523 | G | A | G | R    | exonic     | PGLYRP4  | missense | NM_020393:p.S261F    |
| 16989 | 1  | 156003561 | 156003561 | C | T | C | Y    | intronic   | FCRL2    | NA       | NA                   |
| 16989 | 1  | 173371663 | 173371663 | G | - | T | */-G | exonic     | TNN      | FS_del   | NM_022093:p.V1130fs  |
| 16989 | 1  | 179180116 | 179180116 | T | G | T | K    | intronic   | KIAA1614 | NA       | NA                   |
| 16989 | 1  | 195185291 | 195185291 | G | A | G | R    | exonic     | CFHR2    | missense | NM_005666:p.G48R     |
| 16989 | 1  | 199236532 | 199236532 | C | A | C | M    | splicing   | KIF21B   | NA       | NA                   |
| 16989 | 1  | 245655305 | 245655305 | C | A | C | M    | exonic     | NLRP3    | missense | NM_001079821:p.A646D |
| 16989 | 2  | 25323041  | 25323041  | G | - | A | */-G | exonic     | DNMT3A   | FS_del   | NM_022552:p.L411fs   |
| 16989 | 2  | 48661753  | 48661753  | G | T | G | K    | exonic     | STON1    | missense | NM_006873:p.Q159H    |
| 16989 | 2  | 68529656  | 68529656  | A | G | A | R    | intergenic | NA       | NA       | NA                   |
| 16989 | 2  | 80383448  | 80383448  | G | T | G | K    | exonic     | LRRTM1   | nonsense | NM_178839:p.Y336X    |
| 16989 | 2  | 101992733 | 101992733 | G | T | G | K    | intronic   | IL1R2    | NA       | NA                   |
| 16989 | 3  | 123485778 | 123485778 | A | T | A | W    | exonic     | CASR     | missense | NM_001178065:p.I773F |
| 16989 | 3  | 185955395 | 185955395 | G | A | G | R    | intergenic | NA       | NA       | NA                   |
| 16989 | 3  | 185955397 | 185955397 | A | G | A | R    | intergenic | NA       | NA       | NA                   |
| 16989 | 3  | 185955398 | 185955398 | T | G | T | K    | intergenic | NA       | NA       | NA                   |
| 16989 | 4  | 38474820  | 38474820  | G | T | G | K    | exonic     | TLR1     | silent   | NM_003263:p.G676G    |
| 16989 | 4  | 69824923  | 69824923  | C | A | C | M    | intergenic | NA       | NA       | NA                   |
| 16989 | 5  | 37157651  | 37157651  | C | T | C | Y    | intronic   | C5orf42  | NA       | NA                   |
| 16989 | 5  | 50719207  | 50719207  | C | G | C | S    | exonic     | ISL1     | missense | NM_002202:p.I115M    |
| 16989 | 5  | 79663977  | 79663977  | A | T | A | W    | intergenic | NA       | NA       | NA                   |
| 16989 | 5  | 168133912 | 168133912 | C | T | C | Y    | exonic     | SLIT3    | missense | NM_003062:p.D401N    |
| 16989 | 6  | 143799444 | 143799444 | C | T | C | Y    | intronic   | ADAT2    | NA       | NA                   |
| 16989 | 7  | 21226489  | 21226489  | G | T | G | K    | intergenic | NA       | NA       | NA                   |
| 16989 | 7  | 27101485  | 27101485  | C | A | C | M    | exonic     | HOXA1    | missense | NM_005522:p.C191F    |
| 16989 | 7  | 37591944  | 37591944  | C | A | C | M    | intergenic | NA       | NA       | NA                   |
| 16989 | 8  | 22482596  | 22482596  | C | T | C | Y    | intronic   | SORBS3   | NA       | NA                   |
| 16989 | 8  | 116496276 | 116496276 | G | T | G | K    | exonic     | TRPS1    | silent   | NM_014112:p.P1012P   |
| 16989 | 9  | 67896616  | 67896616  | G | A | G | R    | intergenic | NA       | NA       | NA                   |
| 16989 | 9  | 67910342  | 67910342  | T | A | T | W    | intergenic | NA       | NA       | NA                   |
| 16989 | 11 | 15203920  | 15203920  | G | T | G | K    | exonic     | INSC     | missense | NM_001031853:p.Q427H |
| 16989 | 11 | 47776498  | 47776498  | G | C | G | S    | exonic     | NUP160   | missense | NM_015231:p.Q997E    |
| 16989 | 11 | 49383333  | 49383333  | C | A | C | M    | intergenic | NA       | NA       | NA                   |
| 16989 | 12 | 56252143  | 56252143  | G | T | G | K    | exonic     | KIF5A    | missense | NM_004984:p.K465N    |
| 16989 | 13 | 29680852  | 29680852  | C | A | C | M    | exonic     | KATNAL1  | missense | NM_032116:p.R433I    |
| 16989 | 14 | 94975763  | 94975763  | C | T | C | Y    | exonic     | C14orf49 | missense | NM_152592:p.E729K    |
| 16989 | 15 | 27313962  | 27313962  | C | A | C | M    | intronic   | FAM189A1 | NA       | NA                   |
| 16989 | 15 | 48497802  | 48497802  | C | T | C | Y    | intergenic | NA       | NA       | NA                   |
| 16989 | 15 | 63410495  | 63410495  | G | T | G | K    | exonic     | IGDCC3   | missense | NM_004884:p.P503T    |
| 16989 | 15 | 66065608  | 66065608  | T | C | T | Y    | intergenic | NA       | NA       | NA                   |
| 16989 | 15 | 72213278  | 72213278  | C | A | C | M    | exonic     | ISLR2    | missense | NM_001130137:p.P377H |
| 16989 | 15 | 72254464  | 72254464  | G | T | G | K    | exonic     | ISLR     | missense | NM_005545:p.R71M     |
| 16989 | 15 | 72254465  | 72254465  | G | T | G | K    | exonic     | ISLR     | missense | NM_005545:p.R71S     |
| 16989 | 16 | 20236199  | 20236199  | C | G | C | S    | splicing   | GP2      | NA       | NA                   |
| 16989 | 16 | 31139792  | 31139792  | G | T | G | K    | intronic   | TRIM72   | NA       | NA                   |
| 16989 | 16 | 32799479  | 32799479  | G | T | G | K    | ncRNA      | SLC6A10P | NA       | NA                   |
| 16989 | 16 | 56611586  | 56611586  | G | T | G | K    | exonic     | C16orf57 | missense | NM_001195302:p.R227L |
| 16989 | 16 | 70597904  | 70597904  | T | C | T | Y    | intergenic | NA       | NA       | NA                   |
| 16989 | 17 | 18304947  | 18304947  | C | G | C | S    | intergenic | NA       | NA       | NA                   |
| 16989 | 17 | 35135509  | 35135509  | A | T | A | W    | exonic     | ERBB2    | missense | NM_004448:p.T917S    |
| 16989 | 17 | 36550152  | 36550152  | G | A | G | R    | intergenic | NA       | NA       | NA                   |
| 16989 | 17 | 70355600  | 70355600  | A | T | A | W    | exonic     | GRIN2C   | missense | NM_000835:p.L586H    |
| 16989 | 18 | 14772516  | 14772516  | C | A | C | M    | intronic   | ANKRD30B | NA       | NA                   |
| 16989 | 18 | 27189035  | 27189035  | G | T | G | K    | exonic     | DSG1     | missense | NM_001942:p.G960C    |
| 16989 | 19 | 16179967  | 16179967  | G | T | G | K    | intronic   | AP1M1    | NA       | NA                   |
| 16989 | 19 | 36459745  | 36459745  | G | C | G | S    | exonic     | TSHZ3    | missense | NM_020856:p.R932G    |
| 16989 | 19 | 48122255  | 48122255  | G | T | G | K    | intronic   | PSG7     | NA       | NA                   |
| 16989 | 19 | 63270950  | 63270950  | G | A | G | R    | exonic     | ZNF135   | missense | NM_007134:p.R453Q    |
| 16989 | 20 | 28263510  | 28263510  | T | C | T | Y    | intergenic | NA       | NA       | NA                   |
| 16989 | 20 | 30268176  | 30268176  | G | T | G | K    | exonic     | POFUT1   | missense | NM_015352:p.W178L    |
| 16989 | 20 | 35097179  | 35097179  | C | A | C | M    | exonic     | RBL1     | missense | NM_183404:p.A684S    |
| 16989 | 21 | 9734468   | 9734468   | C | G | C | S    | intergenic | NA       | NA       | NA                   |
| 16989 | 21 | 9734479   | 9734479   | G | T | G | K    | intergenic | NA       | NA       | NA                   |
| 16989 | X  | 24433224  | 24433224  | C | T | C | Y    | intronic   | PDK3     | NA       | NA                   |
| 16989 | X  | 84249320  | 84249320  | C | G | C | S    | exonic     | SATL1    | missense | NM_001012980:p.W437C |
| 16989 | X  | 100004251 | 100004251 | G | A | G | R    | intronic   | NOX1     | NA       | NA                   |
| 16989 | X  | 101025754 | 101025754 | C | A | C | M    | exonic     | ZMAT1    | missense | NM_001011657:p.R434I |
| 16989 | X  | 116917258 | 116917258 | G | A | G | R    | exonic     | KLHL13   | missense | NM_033495:p.L537F    |
| 16989 | X  | 127013435 | 127013435 | C | A | C | M    | exonic     | ACTRT1   | silent   | NM_138289:p.A144A    |
| 16989 | X  | 134572459 | 134572459 | G | T | G | K    | intergenic | NA       | NA       | NA                   |
| 16989 | X  | 144519908 | 144519908 | G | T | G | K    | intergenic | NA       | NA       | NA                   |
| 16989 | Y  | 11875735  | 11875735  | T | G | T | K    | intergenic | NA       | NA       | NA                   |
| 16989 | Y  | 11939480  | 11939480  | G | A | G | R    | intergenic | NA       | NA       | NA                   |
| 16989 | Y  | 57433907  | 57433907  | G | A | G | R    | intergenic | NA       | NA       | NA                   |
| 16989 | Y  | 57439304  | 57439304  | C | A | C | M    | intergenic | NA       | NA       | NA                   |
| 16989 | M  | 3516      | 3516      | T | C | T | Y    | intergenic | NA       | NA       | NA                   |
| 17273 | 1  | 141858684 | 141858684 | C | T | C | Y    | intergenic | NA       | NA       | NA                   |

|       |    |           |           |   |   |   |      |            |           |          |                      |
|-------|----|-----------|-----------|---|---|---|------|------------|-----------|----------|----------------------|
| 17273 | 1  | 141893740 | 141893740 | C | A | C | M    | intergenic | NA        | NA       | NA                   |
| 17273 | 1  | 142354717 | 142354717 | T | A | T | W    | intergenic | NA        | NA       | NA                   |
| 17273 | 1  | 147296028 | 147296028 | G | A | G | R    | intergenic | NA        | NA       | NA                   |
| 17273 | 1  | 147296059 | 147296059 | A | T | A | W    | intergenic | NA        | NA       | NA                   |
| 17273 | 2  | 90978495  | 90978495  | C | T | C | Y    | intergenic | NA        | NA       | NA                   |
| 17273 | 2  | 132737381 | 132737381 | A | C | A | M    | intergenic | NA        | NA       | NA                   |
| 17273 | 2  | 227635434 | 227635434 | T | G | T | K    | intronic   | COL4A4    | NA       | NA                   |
| 17273 | 6  | 167035904 | 167035904 | C | T | C | Y    | intronic   | RPS6KA2   | NA       | NA                   |
| 17273 | 7  | 61605718  | 61605718  | G | C | G | S    | intergenic | NA        | NA       | NA                   |
| 17273 | 8  | 141514555 | 141514555 | A | C | A | M    | intronic   | TRAPPC9   | NA       | NA                   |
| 17273 | 10 | 38858537  | 38858537  | G | T | G | K    | intergenic | NA        | NA       | NA                   |
| 17273 | 10 | 127570883 | 127570883 | T | C | T | Y    | intergenic | NA        | NA       | NA                   |
| 17273 | 14 | 18184517  | 18184517  | T | C | T | Y    | intergenic | NA        | NA       | NA                   |
| 17273 | 15 | 18710256  | 18710256  | G | T | G | K    | intergenic | NA        | NA       | NA                   |
| 17273 | 15 | 18742156  | 18742156  | A | T | A | W    | intergenic | NA        | NA       | NA                   |
| 17273 | 17 | 20712749  | 20712749  | A | T | A | W    | intronic   | CCDC144NL | NA       | NA                   |
| 17273 | 18 | 99468     | 99468     | T | G | T | K    | ncRNA      | ROCK1P1   | NA       | NA                   |
| 17273 | 18 | 16766258  | 16766258  | A | T | A | W    | intergenic | NA        | NA       | NA                   |
| 17273 | 18 | 16766268  | 16766268  | T | C | T | Y    | intergenic | NA        | NA       | NA                   |
| 17273 | 18 | 16769780  | 16769780  | T | C | T | Y    | intergenic | NA        | NA       | NA                   |
| 17273 | 19 | 38136319  | 38136319  | C | T | C | Y    | intronic   | CCDC123   | NA       | NA                   |
| 17273 | 20 | 28261745  | 28261745  | A | G | A | R    | intergenic | NA        | NA       | NA                   |
| 17273 | 20 | 28263855  | 28263855  | T | G | T | K    | intergenic | NA        | NA       | NA                   |
| 17273 | 21 | 9765896   | 9765896   | C | T | C | Y    | intergenic | NA        | NA       | NA                   |
| 17273 | 21 | 10101573  | 10101573  | T | A | T | W    | intronic   | BAGE      | NA       | NA                   |
| 18472 | 1  | 11225925  | 11225925  | A | T | A | W    | exonic     | MTOR      | missense | NM_004958:p.D415E    |
| 18472 | 1  | 40571318  | 40571318  | T | - | A | */-T | intergenic | NA        | NA       | NA                   |
| 18472 | 1  | 45583360  | 45583360  | G | A | G | R    | exonic     | TESK2     | silent   | NM_007170:p.R485R    |
| 18472 | 1  | 141479247 | 141479247 | C | A | C | M    | intergenic | NA        | NA       | NA                   |
| 18472 | 1  | 141482690 | 141482690 | C | A | C | M    | intergenic | NA        | NA       | NA                   |
| 18472 | 1  | 141482694 | 141482694 | A | T | A | W    | intergenic | NA        | NA       | NA                   |
| 18472 | 1  | 141844473 | 141844473 | C | T | C | Y    | intergenic | NA        | NA       | NA                   |
| 18472 | 1  | 141844497 | 141844497 | G | T | G | K    | intergenic | NA        | NA       | NA                   |
| 18472 | 1  | 147326624 | 147326624 | C | T | C | Y    | intergenic | NA        | NA       | NA                   |
| 18472 | 1  | 177790191 | 177790191 | T | C | T | Y    | intronic   | C1orf125  | NA       | NA                   |
| 18472 | 1  | 207865871 | 207865871 | C | T | C | Y    | exonic     | LAMB3     | missense | NM_000228:p.R574H    |
| 18472 | 1  | 235104632 | 235104632 | A | T | A | W    | intronic   | MTR       | NA       | NA                   |
| 18472 | 1  | 239818721 | 239818721 | C | T | C | Y    | exonic     | KMO       | missense | NM_003679:p.A355V    |
| 18472 | 2  | 61475918  | 61475918  | A | G | A | R    | intronic   | USP34     | NA       | NA                   |
| 18472 | 2  | 91002425  | 91002425  | A | G | A | R    | intergenic | NA        | NA       | NA                   |
| 18472 | 2  | 91022985  | 91022985  | A | G | A | R    | intergenic | NA        | NA       | NA                   |
| 18472 | 2  | 127723987 | 127723987 | A | - | C | */-A | intergenic | NA        | NA       | NA                   |
| 18472 | 2  | 152021416 | 152021416 | A | G | A | R    | intronic   | RIF1      | NA       | NA                   |
| 18472 | 2  | 157992155 | 157992155 | A | G | A | R    | exonic     | CYTIP     | missense | NM_004288:p.M167T    |
| 18472 | 2  | 201839759 | 201839759 | G | T | G | K    | splicing   | CASP8     | missense | NM_001080124:p.R102M |
| 18472 | 2  | 206732976 | 206732976 | G | A | G | R    | exonic     | EEF1B2    | missense | NM_001959:p.A10T     |
| 18472 | 2  | 219165468 | 219165468 | T | C | T | Y    | intronic   | RQCD1     | NA       | NA                   |
| 18472 | 2  | 220201467 | 220201467 | C | A | C | M    | exonic     | SLC4A3    | missense | NM_201574:p.L50I     |
| 18472 | 3  | 49734998  | 49734998  | C | T | C | Y    | intronic   | GMPPB     | NA       | NA                   |
| 18472 | 3  | 139665944 | 139665944 | G | A | G | R    | exonic     | ESYT3     | missense | NM_031913:p.R328Q    |
| 18472 | 3  | 198142180 | 198142180 | C | T | C | Y    | exonic     | SENP5     | missense | NM_152699:p.L753F    |
| 18472 | 4  | 6117707   | 6117707   | G | T | G | K    | intronic   | JAKMIP1   | NA       | NA                   |
| 18472 | 4  | 48814800  | 48814800  | T | G | T | K    | intergenic | NA        | NA       | NA                   |
| 18472 | 4  | 48817870  | 48817870  | A | G | A | R    | intergenic | NA        | NA       | NA                   |
| 18472 | 4  | 75703705  | 75703705  | G | A | G | R    | exonic     | AREG      | missense | NM_001657:p.G157R    |
| 18472 | 4  | 111758928 | 111758928 | C | T | C | Y    | exonic     | PITX2     | silent   | NM_000325:p.S259S    |
| 18472 | 4  | 124032931 | 124032931 | A | G | A | R    | exonic     | FGF2      | missense | NM_002006:p.Y266C    |
| 18472 | 4  | 147026794 | 147026794 | C | T | C | Y    | intronic   | ZNF827    | NA       | NA                   |
| 18472 | 4  | 164686150 | 164686150 | G | T | G | K    | intronic   | 1-Mar     | NA       | NA                   |
| 18472 | 4  | 190716012 | 190716012 | A | C | A | M    | intergenic | NA        | NA       | NA                   |
| 18472 | 5  | 72908521  | 72908521  | C | - | T | */-C | intronic   | UTP15     | NA       | NA                   |
| 18472 | 5  | 112185602 | 112185602 | T | - | G | */-T | intronic   | APC       | NA       | NA                   |
| 18472 | 5  | 134938304 | 134938304 | T | C | T | Y    | intronic   | CXCL14    | NA       | NA                   |
| 18472 | 5  | 148978715 | 148978715 | G | A | G | R    | exonic     | ARHGEF37  | missense | NM_001001669:p.D271N |
| 18472 | 6  | 2620249   | 2620249   | A | - | G | */-A | intronic   | MYLK4     | NA       | NA                   |
| 18472 | 6  | 29697940  | 29697940  | G | A | G | R    | exonic     | GABBR1    | nonsense | NM_001470:p.R329X    |
| 18472 | 6  | 33396721  | 33396721  | C | T | C | Y    | exonic     | DAXX      | missense | NM_001141969:p.R270H |
| 18472 | 6  | 44465973  | 44465973  | T | - | A | */-T | intronic   | CDC5L     | NA       | NA                   |
| 18472 | 6  | 88910831  | 88910831  | G | A | G | R    | exonic     | CNR1      | silent   | NM_001160258:p.Y294Y |
| 18472 | 6  | 99903662  | 99903662  | C | - | G | */-C | intronic   | C6orf168  | NA       | NA                   |
| 18472 | 6  | 111858156 | 111858156 | C | T | C | Y    | intronic   | REV3L     | NA       | NA                   |
| 18472 | 6  | 144169870 | 144169870 | T | - | A | */-T | intronic   | PHACTR2   | NA       | NA                   |
| 18472 | 6  | 163069480 | 163069480 | G | A | G | R    | intronic   | PACRG     | NA       | NA                   |
| 18472 | 7  | 1556432   | 1556432   | T | C | T | Y    | intronic   | TMEM184A  | NA       | NA                   |
| 18472 | 7  | 6935933   | 6935933   | C | A | C | M    | intergenic | NA        | NA       | NA                   |
| 18472 | 7  | 64860421  | 64860421  | G | T | G | K    | ncRNA      | CCT6P1    | NA       | NA                   |
| 18472 | 7  | 99589088  | 99589088  | C | - | G | */-C | intronic   | C7orf59   | NA       | NA                   |
| 18472 | 7  | 149617558 | 149617558 | T | C | T | Y    | exonic     | ACTR3C    | missense | NM_001164458:p.I71V  |
| 18472 | 7  | 149665195 | 149665195 | C | T | C | Y    | exonic     | LRR61     | silent   | NM_023942:p.A104A    |

|       |    |           |           |   |   |   |      |            |          |          |                       |
|-------|----|-----------|-----------|---|---|---|------|------------|----------|----------|-----------------------|
| 18472 | 8  | 12027674  | 12027674  | G | A | G | R    | ncRNA      | FAM66D   | NA       | NA                    |
| 18472 | 8  | 23273689  | 23273689  | G | A | G | R    | exonic     | LOXL2    | silent   | NM_002318:p.G130G     |
| 18472 | 8  | 27350720  | 27350720  | A | G | A | R    | intronic   | PTK2B    | NA       | NA                    |
| 18472 | 8  | 52796759  | 52796759  | A | - | T | */-A | intronic   | PXDNL    | NA       | NA                    |
| 18472 | 8  | 101794213 | 101794213 | A | G | A | R    | intronic   | PABPC1   | NA       | NA                    |
| 18472 | 8  | 145062820 | 145062820 | C | T | C | Y    | exonic     | PLEC     | missense | NM_201384:p.R4386H    |
| 18472 | 9  | 38385946  | 38385946  | C | T | C | Y    | exonic     | ALDH1B1  | silent   | NM_000692:p.H67H      |
| 18472 | 9  | 67904059  | 67904059  | T | C | T | Y    | intergenic | NA       | NA       | NA                    |
| 18472 | 9  | 67904123  | 67904123  | T | G | T | K    | intergenic | NA       | NA       | NA                    |
| 18472 | 9  | 85115200  | 85115200  | A | - | T | */-A | intronic   | FRMD3    | NA       | NA                    |
| 18472 | 9  | 115970958 | 115970958 | G | C | G | S    | exonic     | COL27A1  | missense | NM_032888:p.R434S     |
| 18472 | 9  | 130052151 | 130052151 | G | A | G | R    | intronic   | DNM1     | NA       | NA                    |
| 18472 | 9  | 133759164 | 133759164 | T | C | T | Y    | exonic     | MED27    | missense | NM_004269:p.M204V     |
| 18472 | 10 | 6303442   | 6303442   | C | T | C | Y    | exonic     | PFKFB3   | silent   | NM_001145443:p.A288A  |
| 18472 | 10 | 26546545  | 26546545  | C | T | C | Y    | splicing   | GAD2     | missense | NM_001134366:p.A26V   |
| 18472 | 10 | 27548715  | 27548715  | C | G | C | S    | exonic     | ACBD5    | missense | NM_145698:p.E190Q     |
| 18472 | 10 | 41685573  | 41685573  | T | A | T | W    | intergenic | NA       | NA       | NA                    |
| 18472 | 10 | 41685574  | 41685574  | C | A | C | M    | intergenic | NA       | NA       | NA                    |
| 18472 | 10 | 41713983  | 41713983  | A | G | A | R    | intergenic | NA       | NA       | NA                    |
| 18472 | 10 | 61693590  | 61693590  | G | A | G | R    | intronic   | ANK3     | NA       | NA                    |
| 18472 | 10 | 69918192  | 69918192  | C | T | C | Y    | intronic   | SLC25A16 | NA       | NA                    |
| 18472 | 10 | 90691018  | 90691018  | A | G | A | R    | exonic     | ACTA2    | silent   | NM_001613:p.T188T     |
| 18472 | 10 | 95316832  | 95316832  | G | A | G | R    | exonic     | GPR120   | missense | NM_001195755:p.G122D  |
| 18472 | 10 | 99116424  | 99116424  | G | T | G | K    | intronic   | RRP12    | NA       | NA                    |
| 18472 | 10 | 115354659 | 115354659 | C | T | C | Y    | exonic     | NRAP     | missense | NM_006175:p.R1274K    |
| 18472 | 10 | 116709465 | 116709465 | C | A | C | M    | intronic   | TRUB1    | NA       | NA                    |
| 18472 | 10 | 121819497 | 121819497 | G | A | G | R    | intergenic | NA       | NA       | NA                    |
| 18472 | 11 | 1930563   | 1930563   | T | - | A | */-T | intronic   | MRPL23   | NA       | NA                    |
| 18472 | 11 | 6200327   | 6200327   | A | G | A | R    | exonic     | FAM160A2 | missense | NM_032127:p.L371P     |
| 18472 | 11 | 9726045   | 9726045   | G | A | G | R    | exonic     | SWAP70   | missense | NM_015055:p.A474T     |
| 18472 | 11 | 62517546  | 62517546  | C | A | C | M    | exonic     | SLC22A8  | silent   | NM_001184736:p.G362G  |
| 18472 | 11 | 116197645 | 116197645 | C | T | C | Y    | exonic     | APOA4    | silent   | NM_000482:p.L113L     |
| 18472 | 11 | 128286493 | 128286493 | C | T | C | Y    | exonic     | KCNJ5    | missense | NM_000890:p.R39C      |
| 18472 | 12 | 537121    | 537121    | G | A | G | R    | exonic     | B4GALNT3 | missense | NM_173593:p.V823I     |
| 18472 | 12 | 9464172   | 9464172   | G | A | G | R    | ncRNA      | DDX12    | NA       | NA                    |
| 18472 | 12 | 45044674  | 45044674  | A | - | T | */-A | intronic   | SLC38A2  | NA       | NA                    |
| 18472 | 12 | 47378166  | 47378166  | A | - | G | */-A | intronic   | CCNT1    | NA       | NA                    |
| 18472 | 12 | 47545749  | 47545749  | C | T | C | Y    | exonic     | RND1     | silent   | NM_014470:p.Q23Q      |
| 18472 | 12 | 52001409  | 52001409  | G | - | C | */-G | exonic     | AAAS     | FS_del   | NM_015665:p.P36fs     |
| 18472 | 12 | 53051837  | 53051837  | C | - | A | */-C | intronic   | ZNF385A  | NA       | NA                    |
| 18472 | 12 | 55151770  | 55151770  | A | G | A | R    | intronic   | GLS2     | NA       | NA                    |
| 18472 | 13 | 114028549 | 114028549 | A | G | A | R    | intronic   | CDC16    | NA       | NA                    |
| 18472 | 14 | 22896379  | 22896379  | C | A | C | M    | exonic     | EFS      | missense | NM_032459:p.G435C     |
| 18472 | 14 | 35193410  | 35193410  | C | T | C | Y    | exonic     | RALGAPA1 | missense | NM_194301:p.V1335I    |
| 18472 | 14 | 51575302  | 51575302  | G | T | G | K    | exonic     | NID2     | missense | NM_007361:p.L724M     |
| 18472 | 14 | 64475994  | 64475994  | G | A | G | R    | exonic     | GPX2     | missense | NM_002083:p.P180S     |
| 18472 | 14 | 89799659  | 89799659  | C | T | C | Y    | intronic   | PSMC1    | NA       | NA                    |
| 18472 | 15 | 48573526  | 48573526  | T | C | T | Y    | intronic   | USP8     | NA       | NA                    |
| 18472 | 16 | 17128975  | 17128975  | C | T | C | Y    | intronic   | XYLT1    | NA       | NA                    |
| 18472 | 16 | 30997347  | 30997347  | C | T | C | Y    | exonic     | ZNF646   | missense | NM_014699:p.S734F     |
| 18472 | 16 | 33864695  | 33864695  | T | C | T | Y    | intergenic | NA       | NA       | NA                    |
| 18472 | 16 | 34640134  | 34640134  | A | G | A | R    | intergenic | NA       | NA       | NA                    |
| 18472 | 16 | 44990619  | 44990619  | C | T | C | Y    | intergenic | NA       | NA       | NA                    |
| 18472 | 16 | 45905104  | 45905104  | A | - | T | */-A | intronic   | ITFG1    | NA       | NA                    |
| 18472 | 16 | 68946899  | 68946899  | A | G | A | R    | exonic     | DDX19A   | silent   | NM_018332:p.K39K      |
| 18472 | 16 | 84512357  | 84512357  | T | - | A | */-T | exonic     | IRF8     | FS_del   | NM_002163:p.F417fs    |
| 18472 | 17 | 2516097   | 2516097   | A | - | G | */-A | exonic     | PFAFH1B1 | FS_del   | NM_000430:p.E52fs     |
| 18472 | 17 | 6439098   | 6439098   | C | T | C | Y    | splicing   | KIAA0753 | NA       | NA                    |
| 18472 | 17 | 6593960   | 6593960   | G | A | G | R    | intergenic | NA       | NA       | NA                    |
| 18472 | 17 | 7163125   | 7163125   | G | A | G | R    | exonic     | NEURL4   | missense | NM_001005408:p.R1216W |
| 18472 | 17 | 24262275  | 24262275  | T | C | T | Y    | exonic     | PHF12    | silent   | NM_001033561:p.A732A  |
| 18472 | 17 | 46452553  | 46452553  | T | C | T | Y    | exonic     | SPAG9    | missense | NM_001130528:p.M353V  |
| 18472 | 17 | 59259347  | 59259347  | A | G | A | R    | intronic   | PSMC5    | NA       | NA                    |
| 18472 | 18 | 14122259  | 14122259  | - | C | G | */+C | ncRNA      | ZNF519   | NA       | NA                    |
| 18472 | 18 | 27947722  | 27947722  | T | C | T | Y    | exonic     | RNF138   | missense | NM_001191324:p.M135T  |
| 18472 | 19 | 13411996  | 13411996  | G | A | G | R    | exonic     | NDUFS7   | missense | NM_024407:p.V119I     |
| 18472 | 19 | 6618306   | 6618306   | G | A | G | R    | intronic   | TNFSF14  | NA       | NA                    |
| 18472 | 19 | 9207485   | 9207485   | C | T | C | Y    | intergenic | NA       | NA       | NA                    |
| 18472 | 19 | 10966645  | 10966645  | C | T | C | Y    | exonic     | SMARCA4  | missense | NM_001128845:p.R521W  |
| 18472 | 19 | 13087558  | 13087558  | G | A | G | R    | exonic     | TRMT1    | missense | NM_001142554:p.T112M  |
| 18472 | 19 | 14439427  | 14439427  | G | T | G | K    | exonic     | PKN1     | missense | NM_002741:p.Q594H     |
| 18472 | 19 | 15332802  | 15332802  | G | A | G | R    | intronic   | AKAP8    | NA       | NA                    |
| 18472 | 19 | 23119669  | 23119669  | A | G | A | R    | intergenic | NA       | NA       | NA                    |
| 18472 | 19 | 38646856  | 38646856  | C | T | C | Y    | intronic   | PEPD     | NA       | NA                    |
| 18472 | 19 | 42476568  | 42476568  | C | G | C | S    | intergenic | NA       | NA       | NA                    |
| 18472 | 19 | 45775974  | 45775974  | C | T | C | Y    | intronic   | SHKBP1   | NA       | NA                    |
| 18472 | 19 | 61135459  | 61135459  | C | A | C | M    | exonic     | NLRP13   | missense | NM_176810:p.G11C      |
| 18472 | 20 | 18433369  | 18433369  | C | T | C | Y    | intergenic | NA       | NA       | NA                    |
| 18472 | 20 | 24941556  | 24941556  | G | A | G | R    | exonic     | ACSS1    | silent   | NM_032501:p.D533D     |



|       |    |           |           |   |   |   |      |            |         |          |                      |
|-------|----|-----------|-----------|---|---|---|------|------------|---------|----------|----------------------|
| 18472 | 20 | 28196493  | 28196493  | T | G | T | K    | intergenic | NA      | NA       | NA                   |
| 18472 | 20 | 28196548  | 28196548  | A | G | A | R    | intergenic | NA      | NA       | NA                   |
| 18472 | 20 | 28265671  | 28265671  | C | T | C | Y    | intergenic | NA      | NA       | NA                   |
| 18472 | 20 | 33036365  | 33036365  | C | A | C | M    | exonic     | MYH7B   | silent   | NM_020884:p.A274A    |
| 18472 | 21 | 10198027  | 10198027  | A | G | A | R    | intergenic | NA      | NA       | NA                   |
| 18472 | X  | 46971465  | 46971465  | C | T | C | Y    | intronic   | CDK16   | NA       | NA                   |
| 18472 | X  | 48557922  | 48557922  | G | A | G | R    | intronic   | HDAC6   | NA       | NA                   |
| 18472 | X  | 53619386  | 53619386  | T | C | T | Y    | exonic     | HUWE1   | missense | NM_031407:p.Y1991C   |
| 18472 | X  | 70741089  | 70741089  | A | G | A | R    | exonic     | ACRC    | missense | NM_052957:p.R413G    |
| 18472 | X  | 80263600  | 80263600  | A | - | T | *-/A | intronic   | HMG5    | NA       | NA                   |
| 18472 | X  | 152607446 | 152607446 | G | A | G | R    | exonic     | SLC6A8  | missense | NM_001142805:p.V75M  |
| 18472 | X  | 152840026 | 152840026 | G | A | G | R    | exonic     | ARHGAP4 | missense | NM_001666:p.R141C    |
| 18472 | Y  | 11911343  | 11911343  | T | A | T | W    | intergenic | NA      | NA       | NA                   |
| 7285  | 1  | 1257126   | 1257126   | C | G | C | S    | exonic     | TAS1R3  | missense | NM_152228:p.S146W    |
| 7285  | 1  | 8480275   | 8480275   | G | A | G | R    | intronic   | RERE    | NA       | NA                   |
| 7285  | 1  | 15662019  | 15662019  | C | T | C | Y    | intronic   | CELA2A  | NA       | NA                   |
| 7285  | 1  | 21772797  | 21772797  | G | C | G | S    | exonic     | ALPL    | silent   | NM_001127501:p.T250T |
| 7285  | 1  | 50083551  | 50083551  | C | A | C | M    | intronic   | AGBL4   | NA       | NA                   |
| 7285  | 1  | 66871289  | 66871289  | G | A | G | R    | intronic   | SGIP1   | NA       | NA                   |
| 7285  | 1  | 80689741  | 80689741  | G | T | G | K    | intergenic | NA      | NA       | NA                   |
| 7285  | 1  | 89045879  | 89045879  | A | G | A | R    | intronic   | PKN2    | NA       | NA                   |
| 7285  | 1  | 103125275 | 103125275 | T | A | T | W    | intronic   | COL11A1 | NA       | NA                   |
| 7285  | 1  | 110686013 | 110686013 | A | T | A | W    | exonic     | RBM15   | silent   | NM_022768:p.S821S    |
| 7285  | 1  | 115321750 | 115321750 | A | G | A | R    | exonic     | SYCP1   | missense | NM_003176:p.K791R    |
| 7285  | 1  | 121185779 | 121185779 | C | T | C | Y    | intergenic | NA      | NA       | NA                   |
| 7285  | 1  | 143586284 | 143586284 | C | A | C | M    | intronic   | PDE4DIP | NA       | NA                   |
| 7285  | 1  | 147331849 | 147331849 | G | T | G | K    | intergenic | NA      | NA       | NA                   |
| 7285  | 1  | 147360322 | 147360322 | G | A | G | R    | intergenic | NA      | NA       | NA                   |
| 7285  | 1  | 152049361 | 152049361 | G | A | G | R    | exonic     | GATAD2B | silent   | NM_020699:p.P566P    |
| 7285  | 1  | 152584147 | 152584147 | G | T | G | K    | exonic     | ATP8B2  | missense | NM_020452:p.R821L    |
| 7285  | 1  | 153849456 | 153849456 | C | G | C | S    | intronic   | MSTO1   | NA       | NA                   |
| 7285  | 1  | 153849470 | 153849470 | A | G | A | R    | exonic     | MSTO1   | missense | NM_018116:p.T369A    |
| 7285  | 1  | 155145476 | 155145476 | G | C | G | S    | intronic   | PEAR1   | NA       | NA                   |
| 7285  | 1  | 156330179 | 156330179 | G | T | G | K    | intronic   | KIRREL  | NA       | NA                   |
| 7285  | 1  | 156567581 | 156567581 | A | G | A | R    | intronic   | CD1B    | NA       | NA                   |
| 7285  | 1  | 156847745 | 156847745 | G | T | G | K    | exonic     | SPTA1   | missense | NM_003126:p.P2398Q   |
| 7285  | 1  | 156859469 | 156859469 | G | A | G | R    | exonic     | SPTA1   | silent   | NM_003126:p.R2016R   |
| 7285  | 1  | 156889071 | 156889071 | G | T | G | K    | intronic   | SPTA1   | NA       | NA                   |
| 7285  | 1  | 156914323 | 156914323 | A | G | A | R    | intronic   | SPTA1   | NA       | NA                   |
| 7285  | 1  | 156991598 | 156991598 | T | C | T | Y    | exonic     | OR6K6   | silent   | NM_001005184:p.A123A |
| 7285  | 1  | 165172653 | 165172653 | G | A | G | R    | intronic   | ILDR2   | NA       | NA                   |
| 7285  | 1  | 165647779 | 165647779 | C | T | C | Y    | ncRNA      | POU2F1  | NA       | NA                   |
| 7285  | 1  | 168605942 | 168605942 | G | C | G | S    | intergenic | NA      | NA       | NA                   |
| 7285  | 1  | 173571519 | 173571519 | C | A | C | M    | exonic     | TNR     | missense | NM_003285:p.W1194C   |
| 7285  | 1  | 174852157 | 174852157 | T | C | T | Y    | intronic   | PAPPA2  | NA       | NA                   |
| 7285  | 1  | 174931454 | 174931454 | T | C | T | Y    | intronic   | PAPPA2  | NA       | NA                   |
| 7285  | 1  | 175194045 | 175194045 | T | A | T | W    | intronic   | ASTN1   | NA       | NA                   |
| 7285  | 1  | 177856896 | 177856896 | T | A | T | W    | intronic   | TDRD5   | NA       | NA                   |
| 7285  | 1  | 184591427 | 184591427 | G | C | G | S    | exonic     | TPR     | nonsense | NM_003292:p.S662X    |
| 7285  | 1  | 198356676 | 198356676 | T | C | T | Y    | exonic     | NR5A2   | missense | NM_003822:p.C404R    |
| 7285  | 1  | 204080727 | 204080727 | G | A | G | R    | intronic   | PM20D1  | NA       | NA                   |
| 7285  | 1  | 206300678 | 206300678 | G | T | G | K    | exonic     | PLXNA2  | missense | NM_025179:p.P905Q    |
| 7285  | 1  | 213842125 | 213842125 | A | T | A | W    | exonic     | KCTD3   | missense | NM_016121:p.D366V    |
| 7285  | 1  | 213914947 | 213914947 | C | A | C | M    | exonic     | USH2A   | missense | NM_206933:p.S4310I   |
| 7285  | 1  | 214140143 | 214140143 | C | T | C | Y    | exonic     | USH2A   | silent   | NM_206933:p.V2497V   |
| 7285  | 1  | 220986569 | 220986569 | C | A | C | M    | exonic     | FAM177B | missense | NM_207468:p.T20N     |
| 7285  | 1  | 226313475 | 226313475 | T | C | T | Y    | exonic     | WNT3A   | missense | NM_033131:p.S249P    |
| 7285  | 1  | 227840348 | 227840348 | C | A | C | M    | exonic     | URB2    | missense | NM_014777:p.T1122K   |
| 7285  | 1  | 228995355 | 228995355 | A | C | A | M    | intronic   | CAPN9   | NA       | NA                   |
| 7285  | 1  | 233950962 | 233950962 | C | T | C | Y    | intronic   | LYST    | NA       | NA                   |
| 7285  | 1  | 238374682 | 238374682 | C | A | C | M    | intronic   | FMN2    | NA       | NA                   |
| 7285  | 1  | 238622385 | 238622385 | T | A | T | W    | intronic   | FMN2    | NA       | NA                   |
| 7285  | 1  | 239735906 | 239735906 | T | C | T | Y    | intronic   | FH      | NA       | NA                   |
| 7285  | 1  | 244877522 | 244877522 | G | T | G | K    | exonic     | CNST    | missense | NM_152609:p.D466Y    |
| 7285  | 1  | 246044826 | 246044826 | T | C | T | Y    | exonic     | OR14A16 | missense | NM_001001966:p.M277V |
| 7285  | 1  | 246058162 | 246058162 | T | C | T | Y    | intergenic | NA      | NA       | NA                   |
| 7285  | 1  | 246071059 | 246071059 | T | C | T | Y    | exonic     | OR11L1  | missense | NM_001001959:p.M255V |
| 7285  | 1  | 246125938 | 246125938 | G | T | G | K    | exonic     | OR2W3   | missense | NM_001001957:p.G143C |
| 7285  | 1  | 246503675 | 246503675 | T | C | T | Y    | exonic     | OR2T33  | missense | NM_001004695:p.H22R  |
| 7285  | 1  | 246553978 | 246553978 | C | T | C | Y    | exonic     | OR2M7   | silent   | NM_001004691:p.R172R |
| 7285  | 1  | 246671528 | 246671528 | G | T | G | K    | intergenic | NA      | NA       | NA                   |
| 7285  | 1  | 246671985 | 246671985 | C | A | C | S    | intergenic | NA      | NA       | NA                   |
| 7285  | 1  | 246752295 | 246752295 | C | G | C | M    | exonic     | OR2G6   | nonsense | NM_001013355:p.S242X |
| 7285  | 2  | 24376603  | 24376603  | C | T | C | Y    | intronic   | ITSN2   | NA       | NA                   |
| 7285  | 2  | 26558817  | 26558817  | A | C | A | M    | exonic     | OTOF    | missense | NM_194248:p.F514V    |
| 7285  | 2  | 37086432  | 37086432  | T | G | T | K    | intronic   | HEATR5B | NA       | NA                   |
| 7285  | 2  | 37207063  | 37207063  | A | C | A | M    | intronic   | EIF2AK2 | NA       | NA                   |
| 7285  | 2  | 40509715  | 40509715  | C | T | C | Y    | exonic     | SLC8A1  | missense | NM_021097:p.D404N    |
| 7285  | 2  | 48996625  | 48996625  | T | G | T | K    | intergenic | NA      | NA       | NA                   |

|      |   |           |           |   |   |   |      |            |           |          |                       |
|------|---|-----------|-----------|---|---|---|------|------------|-----------|----------|-----------------------|
| 7285 | 2 | 61424394  | 61424394  | T | A | T | W    | intronic   | USP34     | NA       | NA                    |
| 7285 | 2 | 71631721  | 71631721  | A | G | A | R    | exonic     | DYSF      | missense | NM_001130979:p.Y553C  |
| 7285 | 2 | 74444039  | 74444039  | C | G | C | S    | exonic     | DCTN1     | missense | NM_001135040:p.G1054R |
| 7285 | 2 | 74505973  | 74505973  | C | A | C | M    | intronic   | WDR54     | NA       | NA                    |
| 7285 | 2 | 87647745  | 87647745  | T | A | T | W    | intergenic | NA        | NA       | NA                    |
| 7285 | 2 | 88073484  | 88073484  | C | G | C | S    | intergenic | NA        | NA       | NA                    |
| 7285 | 2 | 94942161  | 94942161  | G | T | G | K    | ncRNA      | LOC442028 | NA       | NA                    |
| 7285 | 2 | 113667442 | 113667442 | G | T | G | K    | intronic   | PSD4      | NA       | NA                    |
| 7285 | 2 | 114102716 | 114102716 | C | T | C | Y    | exonic     | RABL2A    | silent   | NM_013412:p.N21N      |
| 7285 | 2 | 114734159 | 114734159 | G | C | G | S    | intergenic | NA        | NA       | NA                    |
| 7285 | 2 | 114734160 | 114734160 | G | T | G | K    | intergenic | NA        | NA       | NA                    |
| 7285 | 2 | 115942783 | 115942783 | G | T | G | K    | intronic   | DPP10     | NA       | NA                    |
| 7285 | 2 | 122232772 | 122232772 | G | A | G | R    | exonic     | TSN       | silent   | NM_004622:p.L59L      |
| 7285 | 2 | 127525227 | 127525227 | C | T | C | Y    | exonic     | BIN1      | silent   | NM_139344:p.G435G     |
| 7285 | 2 | 127897139 | 127897139 | C | A | C | M    | exonic     | PROC      | missense | NM_000312:p.H108N     |
| 7285 | 2 | 130509199 | 130509199 | C | A | C | M    | ncRNA      | LOC440905 | NA       | NA                    |
| 7285 | 2 | 131985869 | 131985869 | C | T | C | Y    | ncRNA      | LOC150776 | NA       | NA                    |
| 7285 | 2 | 136286904 | 136286904 | C | T | C | Y    | exonic     | LCT       | silent   | NM_002299:p.V600V     |
| 7285 | 2 | 160443062 | 160443062 | C | A | C | M    | intronic   | LY75      | NA       | NA                    |
| 7285 | 2 | 162961487 | 162961487 | A | T | A | W    | intronic   | KCNH7     | NA       | NA                    |
| 7285 | 2 | 179372887 | 179372887 | G | T | G | K    | intronic   | TTN       | NA       | NA                    |
| 7285 | 2 | 196880877 | 196880877 | C | A | C | M    | intronic   | HECW2     | NA       | NA                    |
| 7285 | 2 | 200508915 | 200508915 | A | G | A | R    | exonic     | C2orf60   | silent   | NM_001039693:p.D225D  |
| 7285 | 2 | 202863261 | 202863261 | T | G | T | K    | intronic   | NOP58     | NA       | NA                    |
| 7285 | 2 | 211178073 | 211178073 | C | T | C | Y    | exonic     | CPS1      | silent   | NM_001122633:p.A619A  |
| 7285 | 3 | 2917273   | 2917273   | A | T | A | W    | intronic   | CNTN4     | NA       | NA                    |
| 7285 | 3 | 5224805   | 5224805   | A | G | A | R    | exonic     | EDEM1     | missense | NM_014674:p.I456V     |
| 7285 | 3 | 35700562  | 35700562  | T | C | T | Y    | UTR3       | ARPP21    | NA       | NA                    |
| 7285 | 3 | 35745939  | 35745939  | C | T | C | Y    | exonic     | ARPP21    | nonsense | NM_016300:p.Q456X     |
| 7285 | 3 | 44907098  | 44907098  | G | C | G | S    | splicing   | TGM4      | NA       | NA                    |
| 7285 | 3 | 52833007  | 52833007  | G | - | C | */-G | exonic     | ITIH4     | FS_del   | NM_001166449:p.R409fs |
| 7285 | 3 | 57257392  | 57257392  | G | T | G | K    | exonic     | APPL1     | missense | NM_012096:p.R279L     |
| 7285 | 3 | 74398266  | 74398266  | A | T | A | W    | intronic   | CNTN3     | NA       | NA                    |
| 7285 | 3 | 98189297  | 98189297  | G | C | G | S    | exonic     | EPHA6     | missense | NM_001080448:p.R295P  |
| 7285 | 3 | 99699598  | 99699598  | C | A | C | M    | exonic     | OR5K2     | missense | NM_001004737:p.N128K  |
| 7285 | 3 | 102430979 | 102430979 | C | A | C | M    | exonic     | IMPG2     | missense | NM_016247:p.V1190L    |
| 7285 | 3 | 109845994 | 109845994 | G | A | G | R    | exonic     | DZIP3     | missense | NM_014648:p.V479M     |
| 7285 | 3 | 110172891 | 110172891 | C | T | C | Y    | exonic     | MORC1     | silent   | NM_014429:p.L842L     |
| 7285 | 3 | 114667252 | 114667252 | C | G | C | S    | exonic     | SPICE1    | missense | NM_144718:p.E409Q     |
| 7285 | 3 | 120615951 | 120615951 | G | C | G | S    | exonic     | ARHGAP31  | missense | NM_020754:p.E829Q     |
| 7285 | 3 | 120908398 | 120908398 | A | T | A | W    | exonic     | C3orf15   | missense | NM_033364:p.Q59H      |
| 7285 | 3 | 121230862 | 121230862 | G | C | G | S    | intronic   | GSK3B     | NA       | NA                    |
| 7285 | 3 | 121386907 | 121386907 | T | G | T | K    | exonic     | GPR156    | missense | NM_153002:p.T209P     |
| 7285 | 3 | 125658134 | 125658134 | C | G | C | S    | intronic   | KALRN     | NA       | NA                    |
| 7285 | 3 | 126125277 | 126125277 | T | G | T | K    | intronic   | MUC13     | NA       | NA                    |
| 7285 | 3 | 126320481 | 126320481 | G | T | G | K    | intronic   | SLC12A8   | NA       | NA                    |
| 7285 | 3 | 134949793 | 134949793 | T | C | T | Y    | intronic   | TF        | NA       | NA                    |
| 7285 | 3 | 137644942 | 137644942 | A | C | A | M    | intronic   | STAG1     | NA       | NA                    |
| 7285 | 3 | 144719435 | 144719435 | C | T | C | Y    | intronic   | SLC9A9    | NA       | NA                    |
| 7285 | 3 | 148603203 | 148603203 | A | T | A | W    | splicing   | ZIC4      | NA       | NA                    |
| 7285 | 3 | 149942333 | 149942333 | G | A | G | R    | exonic     | AGTR1     | missense | NM_009585:p.C274Y     |
| 7285 | 3 | 157312990 | 157312990 | C | T | C | Y    | intergenic | NA        | NA       | NA                    |
| 7285 | 3 | 158228792 | 158228792 | G | A | G | R    | exonic     | LEKR1     | silent   | NM_001004316:p.L525L  |
| 7285 | 3 | 171040658 | 171040658 | T | C | T | Y    | exonic     | LRRC31    | missense | NM_024727:p.S489G     |
| 7285 | 3 | 184974166 | 184974166 | G | G | T | K    | exonic     | YEATS2    | missense | NM_018023:p.L753W     |
| 7285 | 3 | 188053608 | 188053608 | C | G | C | S    | exonic     | ADIPOQ    | missense | NM_004797:p.Q23E      |
| 7285 | 3 | 194815552 | 194815552 | C | T | C | Y    | intronic   | OPA1      | NA       | NA                    |
| 7285 | 3 | 197918766 | 197918766 | G | A | G | R    | UTR3       | C3orf34   | NA       | NA                    |
| 7285 | 3 | 198893119 | 198893119 | G | A | G | R    | exonic     | KIAA0226  | silent   | NM_014687:p.G725G     |
| 7285 | 4 | 4129853   | 4129853   | C | G | C | S    | intergenic | NA        | NA       | NA                    |
| 7285 | 4 | 46625351  | 46625351  | C | A | C | M    | exonic     | GABRA4    | missense | NM_000809:p.R438L     |
| 7285 | 4 | 77114322  | 77114322  | C | T | C | Y    | intronic   | SDAD1     | NA       | NA                    |
| 7285 | 4 | 84610622  | 84610622  | T | C | T | Y    | intronic   | FAM175A   | NA       | NA                    |
| 7285 | 4 | 85845613  | 85845613  | C | T | C | Y    | exonic     | WDFY3     | missense | NM_014991:p.A2765T    |
| 7285 | 4 | 94365000  | 94365000  | A | T | A | W    | intronic   | GRID2     | NA       | NA                    |
| 7285 | 4 | 102166197 | 102166197 | C | A | C | M    | exonic     | PPP3CA    | nonsense | NM_001130692:p.E420X  |
| 7285 | 4 | 103211391 | 103211391 | G | T | G | K    | intronic   | BANK1     | NA       | NA                    |
| 7285 | 4 | 134290881 | 134290881 | A | T | A | W    | exonic     | PCDH10    | missense | NM_032961:p.T465      |
| 7285 | 4 | 164612943 | 164612943 | G | T | G | K    | exonic     | TKTL2     | missense | NM_032136:p.A465D     |
| 7285 | 4 | 174491413 | 174491413 | G | C | G | S    | UTR5       | HMGB2     | NA       | NA                    |
| 7285 | 4 | 176134650 | 176134650 | T | C | T | Y    | exonic     | ADAM29    | missense | NM_014269:p.W467R     |
| 7285 | 4 | 190631357 | 190631357 | C | A | C | M    | ncRNA      | HSP90AA4P | NA       | NA                    |
| 7285 | 5 | 1516958   | 1516958   | G | A | G | R    | intronic   | LPCAT1    | NA       | NA                    |
| 7285 | 5 | 11212613  | 11212613  | A | T | A | W    | intronic   | CTNND2    | NA       | NA                    |
| 7285 | 5 | 23558835  | 23558835  | G | T | G | K    | intronic   | PRDM9     | NA       | NA                    |
| 7285 | 5 | 26916990  | 26916990  | C | T | C | Y    | UTR3       | CDH9      | NA       | NA                    |
| 7285 | 5 | 29038224  | 29038224  | C | G | C | S    | intergenic | NA        | NA       | NA                    |
| 7285 | 5 | 29038225  | 29038225  | C | A | C | M    | intergenic | NA        | NA       | NA                    |
| 7285 | 5 | 29917828  | 29917828  | C | T | C | Y    | intergenic | NA        | NA       | NA                    |

|      |   |           |           |   |   |   |      |            |           |          |                      |
|------|---|-----------|-----------|---|---|---|------|------------|-----------|----------|----------------------|
| 7285 | 5 | 38517785  | 38517785  | T | A | T | W    | exonic     | LIFR      | missense | NM_002310:p.E988V    |
| 7285 | 5 | 41418191  | 41418191  | C | T | C | Y    | exonic     | PLCXD3    | silent   | NM_001005473:p.K102K |
| 7285 | 5 | 41623082  | 41623082  | C | A | C | M    | intergenic | NA        | NA       | NA                   |
| 7285 | 5 | 64120503  | 64120503  | T | C | T | Y    | intronic   | CWC27     | NA       | NA                   |
| 7285 | 5 | 88988743  | 88988743  | G | A | G | R    | intergenic | NA        | NA       | NA                   |
| 7285 | 5 | 96357842  | 96357842  | C | T | C | Y    | intronic   | LNPEP     | NA       | NA                   |
| 7285 | 5 | 128824050 | 128824050 | T | A | T | W    | exonic     | ADAMTS19  | missense | NM_133638:p.F17I     |
| 7285 | 5 | 129058349 | 129058349 | G | A | G | R    | exonic     | ADAMTS19  | missense | NM_133638:p.M946I    |
| 7285 | 5 | 140201589 | 140201589 | G | A | G | R    | exonic     | PCDHA8    | missense | NM_018911:p.V167M    |
| 7285 | 5 | 140548473 | 140548473 | C | A | C | M    | exonic     | PCDHB9    | missense | NM_019119:p.P466Q    |
| 7285 | 5 | 140699883 | 140699883 | C | A | C | M    | exonic     | PCDHGA2   | silent   | NM_018915:p.P387P    |
| 7285 | 5 | 142692369 | 142692369 | T | G | T | K    | intronic   | NR3C1     | NA       | NA                   |
| 7285 | 5 | 147675488 | 147675488 | T | A | T | W    | UTR3       | SPINK7    | NA       | NA                   |
| 7285 | 5 | 156308223 | 156308223 | C | A | C | M    | intronic   | TIMD4     | NA       | NA                   |
| 7285 | 5 | 178341523 | 178341523 | C | G | C | S    | intronic   | GRM6      | NA       | NA                   |
| 7285 | 5 | 178438245 | 178438245 | G | A | G | R    | intronic   | ZNF354C   | NA       | NA                   |
| 7285 | 6 | 24775526  | 24775526  | G | T | G | K    | exonic     | ACOT13    | missense | NM_018473:p.R19L     |
| 7285 | 6 | 25131640  | 25131640  | G | A | G | R    | intergenic | NA        | NA       | NA                   |
| 7285 | 6 | 27599674  | 27599674  | C | A | C | M    | intergenic | NA        | NA       | NA                   |
| 7285 | 6 | 27637359  | 27637359  | G | T | G | K    | intergenic | NA        | NA       | NA                   |
| 7285 | 6 | 28647915  | 28647915  | C | A | C | M    | exonic     | SCAND3    | missense | NM_052923:p.A1244S   |
| 7285 | 6 | 28979947  | 28979947  | A | C | A | M    | exonic     | TRIM27    | missense | NM_006510:p.F474C    |
| 7285 | 6 | 29493875  | 29493875  | C | A | C | M    | intergenic | NA        | NA       | NA                   |
| 7285 | 6 | 32038804  | 32038804  | A | T | A | W    | exonic     | SKIV2L    | missense | NM_006929:p.S454C    |
| 7285 | 6 | 32225202  | 32225202  | C | T | C | Y    | intronic   | PRRT1     | NA       | NA                   |
| 7285 | 6 | 33862469  | 33862469  | C | A | C | M    | intronic   | LEMD2     | NA       | NA                   |
| 7285 | 6 | 40467809  | 40467809  | C | A | C | M    | exonic     | LRFN2     | missense | NM_020737:p.G741C    |
| 7285 | 6 | 46982442  | 46982442  | C | A | C | M    | exonic     | GPR116    | missense | NM_015234:p.R6I      |
| 7285 | 6 | 49517657  | 49517657  | T | C | T | Y    | intronic   | MUT       | NA       | NA                   |
| 7285 | 6 | 50045267  | 50045267  | C | A | C | M    | exonic     | DEFB113   | missense | NM_001037729:p.V11F  |
| 7285 | 6 | 50791344  | 50791344  | C | A | C | M    | intronic   | TFAP2D    | NA       | NA                   |
| 7285 | 6 | 54457918  | 54457918  | A | G | A | R    | intergenic | NA        | NA       | NA                   |
| 7285 | 6 | 56612497  | 56612497  | C | A | C | M    | exonic     | DST       | missense | NM_001723:p.A348S    |
| 7285 | 6 | 66171947  | 66171947  | A | C | A | M    | exonic     | EYS       | silent   | NM_198283:p.V299V    |
| 7285 | 6 | 66860010  | 66860010  | C | T | C | Y    | intergenic | NA        | NA       | NA                   |
| 7285 | 6 | 66860261  | 66860261  | C | A | C | M    | intergenic | NA        | NA       | NA                   |
| 7285 | 6 | 68701013  | 68701013  | A | T | A | W    | intergenic | NA        | NA       | NA                   |
| 7285 | 6 | 69760513  | 69760513  | C | A | C | M    | exonic     | BAI3      | missense | NM_001704:p.L623M    |
| 7285 | 6 | 73957166  | 73957166  | C | A | C | M    | intronic   | KCNQ5     | NA       | NA                   |
| 7285 | 6 | 78229710  | 78229710  | T | C | T | Y    | exonic     | HTR1B     | missense | NM_000863:p.I44V     |
| 7285 | 6 | 88820501  | 88820501  | G | A | G | R    | intronic   | SPACA1    | NA       | NA                   |
| 7285 | 6 | 90456607  | 90456607  | G | A | G | R    | intronic   | MDN1      | NA       | NA                   |
| 7285 | 6 | 90482175  | 90482175  | C | T | C | Y    | exonic     | MDN1      | missense | NM_014611:p.E2260K   |
| 7285 | 6 | 97783521  | 97783521  | C | T | C | Y    | exonic     | MMS22L    | missense | NM_198468:p.S670N    |
| 7285 | 6 | 116865076 | 116865076 | A | G | A | R    | exonic     | DSE       | missense | NM_001080976:p.M918V |
| 7285 | 6 | 118663332 | 118663332 | C | A | C | M    | intronic   | SLC35F1   | NA       | NA                   |
| 7285 | 6 | 128192300 | 128192300 | C | T | C | Y    | intronic   | THEMIS    | NA       | NA                   |
| 7285 | 6 | 132313048 | 132313048 | C | A | C | M    | intronic   | CTGF      | NA       | NA                   |
| 7285 | 6 | 135982577 | 135982577 | G | A | G | R    | ncRNA      | MIR548H4  | NA       | NA                   |
| 7285 | 6 | 140325970 | 140325970 | G | A | G | R    | intergenic | NA        | NA       | NA                   |
| 7285 | 6 | 152796620 | 152796620 | C | T | C | Y    | intronic   | SYNE1     | NA       | NA                   |
| 7285 | 6 | 157339612 | 157339612 | C | G | C | S    | intronic   | ARID1B    | NA       | NA                   |
| 7285 | 6 | 167512028 | 167512028 | C | T | C | Y    | intronic   | TCP10L2   | NA       | NA                   |
| 7285 | 6 | 167648917 | 167648917 | A | - | C | */-A | exonic     | UNC93A    | FS_del   | NM_018974:p.Q454fs   |
| 7285 | 7 | 2020840   | 2020840   | C | T | C | Y    | intronic   | MAD11L    | NA       | NA                   |
| 7285 | 7 | 20657546  | 20657546  | G | T | G | K    | intronic   | ABCB5     | NA       | NA                   |
| 7285 | 7 | 36546432  | 36546432  | G | C | G | S    | intronic   | AOAH      | NA       | NA                   |
| 7285 | 7 | 55833559  | 55833559  | G | T | G | K    | intronic   | 14-Sep    | NA       | NA                   |
| 7285 | 7 | 56603832  | 56603832  | G | A | G | R    | intergenic | NA        | NA       | NA                   |
| 7285 | 7 | 57221338  | 57221338  | G | C | G | S    | intergenic | NA        | NA       | NA                   |
| 7285 | 7 | 62307178  | 62307178  | G | A | G | R    | intergenic | NA        | NA       | NA                   |
| 7285 | 7 | 62798257  | 62798257  | G | T | G | K    | intergenic | NA        | NA       | NA                   |
| 7285 | 7 | 65185648  | 65185648  | G | T | G | K    | intronic   | ASL       | NA       | NA                   |
| 7285 | 7 | 71880437  | 71880437  | T | A | T | W    | exonic     | TYW1B     | missense | NM_001145440:p.N297I |
| 7285 | 7 | 73306608  | 73306608  | C | A | C | M    | exonic     | RFC2      | missense | NM_002914:p.E14D     |
| 7285 | 7 | 76760369  | 76760369  | A | T | A | W    | exonic     | CCDC146   | silent   | NM_020879:p.P860P    |
| 7285 | 7 | 77235845  | 77235845  | T | A | T | W    | intronic   | RSBN1L    | NA       | NA                   |
| 7285 | 7 | 77668450  | 77668450  | T | C | T | Y    | intronic   | MAGI2     | NA       | NA                   |
| 7285 | 7 | 81552033  | 81552033  | G | A | G | R    | exonic     | CACNA2D1  | nonsense | NM_000722:p.R216X    |
| 7285 | 7 | 84848677  | 84848677  | C | T | C | Y    | intergenic | NA        | NA       | NA                   |
| 7285 | 7 | 86253791  | 86253791  | C | G | C | S    | exonic     | GRM3      | silent   | NM_000840:p.R249R    |
| 7285 | 7 | 86392909  | 86392909  | C | T | C | Y    | splicing   | KIAA1324L | NA       | NA                   |
| 7285 | 7 | 86930032  | 86930032  | A | T | A | W    | exonic     | ABCB4     | silent   | NM_018850:p.T88T     |
| 7285 | 7 | 88107266  | 88107266  | C | A | C | M    | intergenic | NA        | NA       | NA                   |
| 7285 | 7 | 91550953  | 91550953  | A | T | A | W    | intronic   | AKAP9     | NA       | NA                   |
| 7285 | 7 | 92936119  | 92936119  | C | T | C | Y    | intronic   | CALCR     | NA       | NA                   |
| 7285 | 7 | 93878184  | 93878184  | C | A | C | M    | exonic     | COL1A2    | silent   | NM_000089:p.G415G    |
| 7285 | 7 | 94067050  | 94067050  | T | C | T | Y    | intronic   | SGCE      | NA       | NA                   |
| 7285 | 7 | 94857442  | 94857442  | T | C | T | Y    | exonic     | PON3      | missense | NM_000940:p.D54G     |

|      |    |           |           |        |       |   |           |            |         |          |                        |
|------|----|-----------|-----------|--------|-------|---|-----------|------------|---------|----------|------------------------|
| 7285 | 7  | 106549671 | 106549671 | G      | C     | G | S         | exonic     | PRKAR2B | missense | NM_002736:p.D128H      |
| 7285 | 7  | 113345544 | 113345544 | A      | G     | A | R         | exonic     | PPP1R3A | silent   | NM_002711:p.P248P      |
| 7285 | 7  | 116907345 | 116907345 | C      | G     | C | S         | UTR5       | CFTR    | NA       | NA                     |
| 7285 | 7  | 117031118 | 117031118 | T      | C     | T | Y         | intronic   | CFTR    | NA       | NA                     |
| 7285 | 7  | 120752769 | 120752769 | T      | C     | T | Y         | splicing   | WNT16   | missense | NM_016087:p.W22R       |
| 7285 | 7  | 124290699 | 124290699 | C      | T     | C | Y         | exonic     | POT1    | missense | NM_015450:p.D163N      |
| 7285 | 7  | 124773101 | 124773101 | G      | T     | G | K         | intergenic | NA      | NA       | NA                     |
| 7285 | 7  | 128274177 | 128274177 | G      | A     | G | R         | exonic     | FLNC    | missense | NM_001127487:p.G1424R  |
| 7285 | 7  | 133230916 | 133230916 | G      | T     | G | K         | exonic     | EXOC4   | missense | NM_021807:p.V587F      |
| 7285 | 7  | 135056760 | 135056760 | C      | A     | C | M         | exonic     | SLC13A4 | nonsense | NM_012450:p.E51X       |
| 7285 | 7  | 148578671 | 148578671 | A      | T     | A | W         | intronic   | ZNF212  | NA       | NA                     |
| 7285 | 8  | 2078833   | 2078833   | G      | A     | G | R         | intronic   | MYOM2   | NA       | NA                     |
| 7285 | 8  | 20066936  | 20066936  | G      | T     | G | K         | intronic   | SLC18A1 | NA       | NA                     |
| 7285 | 8  | 38217014  | 38217014  | C      | A     | C | M         | exonic     | DDHD2   | silent   | NM_015214:p.L229L      |
| 7285 | 8  | 39746172  | 39746172  | A      | T     | A | W         | exonic     | ADAM2   | missense | NM_001464:p.C370S      |
| 7285 | 8  | 42144210  | 42144210  | -      | AGATA | A | */+AGATAC | intronic   | AP3M2   | NA       | NA                     |
| 7285 | 8  | 69184231  | 69184231  | C      | G     | C | S         | exonic     | PREX2   | missense | NM_024870:p.Q989E      |
| 7285 | 8  | 69193377  | 69193377  | C      | A     | C | M         | exonic     | PREX2   | missense | NM_024870:p.T1122N     |
| 7285 | 8  | 75920032  | 75920032  | G      | A     | G | R         | exonic     | PI15    | missense | NM_015886:p.M169I      |
| 7285 | 8  | 81425924  | 81425924  | G      | C     | G | S         | intergenic | NA      | NA       | NA                     |
| 7285 | 8  | 82769362  | 82769362  | T      | A     | T | W         | exonic     | SLC10A5 | missense | NM_001010893:p.Q134L   |
| 7285 | 8  | 82769363  | 82769363  | G      | A     | G | R         | exonic     | SLC10A5 | nonsense | NM_001010893:p.Q134X   |
| 7285 | 8  | 87299119  | 87299119  | G      | A     | G | R         | exonic     | SLC7A13 | missense | NM_138817:p.P292L      |
| 7285 | 8  | 88870526  | 88870526  | G      | C     | G | S         | intergenic | NA      | NA       | NA                     |
| 7285 | 8  | 88954438  | 88954438  | G      | C     | G | S         | exonic     | DCAF4L2 | missense | NM_152418:p.T293S      |
| 7285 | 8  | 90870671  | 90870671  | A      | G     | A | R         | intronic   | RIPK2   | NA       | NA                     |
| 7285 | 8  | 91051915  | 91051915  | C      | A     | C | M         | exonic     | NBN     | missense | NM_002485:p.R250M      |
| 7285 | 8  | 95333446  | 95333446  | C      | A     | C | M         | exonic     | GEM     | missense | NM_005261:p.R197L      |
| 7285 | 8  | 95963186  | 95963186  | A      | T     | A | W         | intronic   | CCNE2   | NA       | NA                     |
| 7285 | 8  | 101089956 | 101089956 | G      | T     | G | K         | exonic     | RGS22   | nonsense | NM_015668:p.Y728X      |
| 7285 | 8  | 105525652 | 105525652 | C      | A     | C | M         | splicing   | DPYS    | missense | NM_001385:p.G265W      |
| 7285 | 8  | 109039549 | 109039549 | G      | T     | G | K         | exonic     | RSPO2   | missense | NM_178565:p.T184K      |
| 7285 | 8  | 113336833 | 113336833 | C      | T     | C | Y         | splicing   | CSMD3   | NA       | NA                     |
| 7285 | 8  | 113383314 | 113383314 | G      | C     | G | S         | exonic     | CSMD3   | missense | NM_052900:p.T2606S     |
| 7285 | 8  | 113747682 | 113747682 | C      | G     | C | S         | splicing   | CSMD3   | missense | NM_052900:p.R835T      |
| 7285 | 8  | 114057194 | 114057194 | T      | C     | T | Y         | intronic   | CSMD3   | NA       | NA                     |
| 7285 | 8  | 121308742 | 121308742 | A      | T     | A | W         | exonic     | COL14A1 | missense | NM_021110:p.S703C      |
| 7285 | 8  | 121362376 | 121362376 | A      | G     | A | R         | exonic     | COL14A1 | missense | NM_021110:p.K1241E     |
| 7285 | 8  | 124462164 | 124462164 | A      | G     | A | R         | intronic   | ATAD2   | NA       | NA                     |
| 7285 | 8  | 139220475 | 139220475 | C      | A     | C | M         | exonic     | FAM135B | missense | NM_015912:p.Q1279H     |
| 7285 | 8  | 139680359 | 139680359 | G      | T     | G | K         | intronic   | COL22A1 | NA       | NA                     |
| 7285 | 8  | 139860868 | 139860868 | A      | T     | A | W         | intronic   | COL22A1 | NA       | NA                     |
| 7285 | 8  | 145210252 | 145210252 | T      | A     | T | W         | intronic   | GPA1    | NA       | NA                     |
| 7285 | 8  | 145633175 | 145633175 | G      | T     | G | K         | intronic   | TONSL   | NA       | NA                     |
| 7285 | 9  | 3888663   | 3888663   | T      | A     | T | W         | ncRNA      | C9orf70 | NA       | NA                     |
| 7285 | 9  | 6665676   | 6665676   | G      | T     | G | K         | intergenic | NA      | NA       | NA                     |
| 7285 | 9  | 27195004  | 27195025  | ATATTG | -     | C | */-       | exonic     | TEK     | FS_del   | NM_000459:p.769_776del |
|      |    |           |           | CAATTG |       |   | ATATTGCAA |            |         |          |                        |
|      |    |           |           | AAGAGG |       |   | TTGAAGAG  |            |         |          |                        |
|      |    |           |           | GCAA   |       |   | GGCAA     |            |         |          |                        |
| 7285 | 9  | 32324176  | 32324176  | G      | T     | G | K         | intergenic | NA      | NA       | NA                     |
| 7285 | 9  | 32620237  | 32620237  | C      | T     | C | Y         | exonic     | TAF1L   | missense | NM_153809:p.E1781K     |
| 7285 | 9  | 36664928  | 36664928  | A      | G     | A | R         | exonic     | MELK    | missense | NM_014791:p.Q591R      |
| 7285 | 9  | 37467356  | 37467356  | A      | G     | A | R         | intergenic | NA      | NA       | NA                     |
| 7285 | 9  | 39155863  | 39155863  | C      | G     | C | S         | intronic   | CNTNAP3 | NA       | NA                     |
| 7285 | 9  | 67906873  | 67906873  | T      | C     | T | Y         | intergenic | NA      | NA       | NA                     |
| 7285 | 9  | 67907127  | 67907127  | G      | T     | G | K         | intergenic | NA      | NA       | NA                     |
| 7285 | 9  | 68163780  | 68163780  | G      | T     | G | K         | intergenic | NA      | NA       | NA                     |
| 7285 | 9  | 73539568  | 73539568  | C      | T     | C | Y         | exonic     | TMEM2   | missense | NM_013390:p.C456Y      |
| 7285 | 9  | 75280259  | 75280259  | C      | A     | C | M         | intergenic | NA      | NA       | NA                     |
| 7285 | 9  | 78797259  | 78797259  | C      | T     | C | Y         | intergenic | NA      | NA       | NA                     |
| 7285 | 9  | 79145215  | 79145215  | A      | C     | A | M         | exonic     | VPS13A  | missense | NM_033305:p.N2319H     |
| 7285 | 9  | 98751630  | 98751630  | T      | A     | T | W         | ncRNA      | HIATL2  | NA       | NA                     |
| 7285 | 9  | 108972941 | 108972941 | G      | T     | G | K         | intergenic | NA      | NA       | NA                     |
| 7285 | 9  | 121015993 | 121015993 | A      | T     | A | W         | intronic   | DBC1    | NA       | NA                     |
| 7285 | 9  | 121115419 | 121115419 | C      | A     | C | M         | exonic     | DBC1    | silent   | NM_014618:p.L12L       |
| 7285 | 9  | 122926127 | 122926127 | C      | G     | C | S         | exonic     | CEP110  | missense | NM_007018:p.S583C      |
| 7285 | 9  | 124981081 | 124981081 | C      | T     | C | Y         | ncRNA      | STRBP   | NA       | NA                     |
| 7285 | 9  | 129645254 | 129645254 | G      | A     | G | R         | exonic     | ENG     | silent   | NM_000118:p.C53C       |
| 7285 | 9  | 134263583 | 134263583 | A      | C     | A | M         | intronic   | TTF1    | NA       | NA                     |
| 7285 | 9  | 134885346 | 134885346 | G      | T     | G | K         | intergenic | NA      | NA       | NA                     |
| 7285 | 9  | 134967956 | 134967956 | C      | T     | C | Y         | intronic   | RALGDS  | NA       | NA                     |
| 7285 | 9  | 138998989 | 138998989 | T      | C     | T | Y         | exonic     | LCN1    | missense | NM_207510:p.M67T       |
| 7285 | 9  | 139899111 | 139899111 | A      | G     | A | R         | intronic   | CACNA1B | NA       | NA                     |
| 7285 | 10 | 83461     | 83461     | G      | C     | G | S         | exonic     | TUBB8   | missense | NM_001164154:p.Q219E   |
| 7285 | 10 | 6094919   | 6094919   | T      | G     | T | K         | intronic   | IL2RA   | NA       | NA                     |
| 7285 | 10 | 7365840   | 7365840   | T      | C     | T | Y         | intronic   | SFMBT2  | NA       | NA                     |

|      |    |           |           |     |   |   |        |            |          |           |                        |
|------|----|-----------|-----------|-----|---|---|--------|------------|----------|-----------|------------------------|
| 7285 | 10 | 7826091   | 7826091   | C   | T | C | Y      | exonic     | ITIH2    | silent    | NM_002216:p.P750P      |
| 7285 | 10 | 15100071  | 15100071  | A   | G | A | R      | intergenic | NA       | NA        | NA                     |
| 7285 | 10 | 16956337  | 16956337  | G   | T | G | K      | intronic   | CUBN     | NA        | NA                     |
| 7285 | 10 | 26829991  | 26829991  | C   | A | C | M      | exonic     | APBB1IP  | missense  | NM_019043:p.A133D      |
| 7285 | 10 | 29011068  | 29011068  | C   | T | C | Y      | exonic     | BAMBI    | missense  | NM_012342:p.A172V      |
| 7285 | 10 | 35507861  | 35507861  | A   | G | A | R      | exonic     | CREM     | silent    | NM_183011:p.S69S       |
| 7285 | 10 | 37667598  | 37667598  | A   | G | A | R      | intergenic | NA       | NA        | NA                     |
| 7285 | 10 | 38383809  | 38383809  | G   | A | G | R      | exonic     | ZNF33A   | missense  | NM_006974:p.E250K      |
| 7285 | 10 | 42930047  | 42930047  | C   | T | C | Y      | exonic     | RET      | missense  | NM_020975:p.H665Y      |
| 7285 | 10 | 43420673  | 43420673  | G   | T | G | K      | intergenic | NA       | NA        | NA                     |
| 7285 | 10 | 55625528  | 55625528  | G   | T | G | K      | exonic     | PCDH15   | missense  | NM_001142766:p.P409Q   |
| 7285 | 10 | 60232938  | 60232938  | G   | A | G | R      | exonic     | BICC1    | missense  | NM_001080512:p.R704K   |
| 7285 | 10 | 60566582  | 60566582  | A   | C | A | M      | intergenic | NA       | NA        | NA                     |
| 7285 | 10 | 68196044  | 68196044  | G   | T | G | K      | exonic     | CTNNA3   | missense  | NM_001127384:p.T422N   |
| 7285 | 10 | 69420795  | 69420795  | A   | G | A | R      | intronic   | HERC4    | NA        | NA                     |
| 7285 | 10 | 70625067  | 70625067  | A   | G | A | R      | intronic   | SUP3L1   | NA        | NA                     |
| 7285 | 10 | 72170810  | 72170810  | G   | T | G | K      | exonic     | ADAMT514 | nonsense  | NM_080722:p.E604X      |
| 7285 | 10 | 74775033  | 74775033  | C   | A | C | M      | intronic   | TTC18    | NA        | NA                     |
| 7285 | 10 | 75236018  | 75236018  | G   | C | G | S      | intronic   | NDST2    | NA        | NA                     |
| 7285 | 10 | 88442364  | 88442364  | G   | C | G | S      | intronic   | LDB3     | NA        | NA                     |
| 7285 | 10 | 89392512  | 89392512  | A   | - | G | */-A   | intergenic | NA       | NA        | NA                     |
| 7285 | 10 | 95710139  | 95710139  | G   | T | G | K      | ncRNA      | PIPSL    | NA        | NA                     |
| 7285 | 10 | 97800275  | 97800275  | T   | C | T | Y      | intronic   | CCNJ     | NA        | NA                     |
| 7285 | 10 | 103910284 | 103910284 | C   | T | C | Y      | exonic     | NOLC1    | silent    | NM_004741:p.T395T      |
| 7285 | 10 | 106103758 | 106103758 | C   | G | C | S      | intronic   | CCDC147  | NA        | NA                     |
| 7285 | 10 | 117813863 | 117813863 | C   | G | C | S      | UTR3       | GFRA1    | NA        | NA                     |
| 7285 | 10 | 118304620 | 118304620 | T   | C | T | Y      | intronic   | PNLIP    | NA        | NA                     |
| 7285 | 10 | 118414265 | 118414265 | T   | A | T | W      | exonic     | C10orf82 | missense  | NM_144661:p.E153V      |
| 7285 | 10 | 121388570 | 121388570 | C   | A | C | M      | intergenic | NA       | NA        | NA                     |
| 7285 | 10 | 124047284 | 124047286 | TGA | - | - | */-TGA | exonic     | BTBD16   | nonFS_del | NM_144587:p.201_202del |
| 7285 | 10 | 131650446 | 131650446 | G   | C | G | S      | exonic     | EBF3     | silent    | NM_001005463:p.L130L   |
| 7285 | 11 | 4826314   | 4826314   | C   | T | C | Y      | exonic     | OR5151   | missense  | NM_001004758:p.G234D   |
| 7285 | 11 | 4966002   | 4966002   | C   | A | C | M      | UTR5       | MMP26    | NA        | NA                     |
| 7285 | 11 | 5485576   | 5485576   | G   | A | G | R      | exonic     | UBQLN3   | missense  | NM_017481:p.H597Y      |
| 7285 | 11 | 5523043   | 5523043   | C   | G | C | S      | exonic     | OR52H1   | missense  | NM_001005289:p.G96A    |
| 7285 | 11 | 5587985   | 5587985   | C   | A | C | M      | exonic     | TRIM6    | missense  | NM_001003819:p.L298I   |
| 7285 | 11 | 5835396   | 5835396   | A   | G | A | R      | exonic     | OR52E8   | missense  | NM_001005168:p.F38S    |
| 7285 | 11 | 6005608   | 6005608   | G   | T | G | K      | upstream   | OR56A1   | NA        | NA                     |
| 7285 | 11 | 6379979   | 6379979   | G   | A | G | R      | exonic     | APBB1    | silent    | NM_001164:p.L431L      |
| 7285 | 11 | 6455741   | 6455741   | T   | C | T | Y      | intronic   | ARFIP2   | NA        | NA                     |
| 7285 | 11 | 19215456  | 19215456  | G   | A | G | R      | exonic     | E2F8     | silent    | NM_024680:p.D144D      |
| 7285 | 11 | 20472303  | 20472303  | G   | - | C | */-G   | exonic     | PRMT3    | FS_del    | NM_001145166:p.T409fs  |
| 7285 | 11 | 28091661  | 28091661  | G   | C | G | S      | exonic     | METT5D1  | missense  | NM_001113528:p.M68I    |
| 7285 | 11 | 29990188  | 29990188  | G   | C | G | S      | exonic     | KCNA4    | missense  | NM_002233:p.P205R      |
| 7285 | 11 | 38426297  | 38426297  | G   | T | G | K      | intergenic | NA       | NA        | NA                     |
| 7285 | 11 | 38426640  | 38426640  | T   | A | T | W      | intergenic | NA       | NA        | NA                     |
| 7285 | 11 | 39139752  | 39139752  | C   | A | C | M      | intergenic | NA       | NA        | NA                     |
| 7285 | 11 | 40062527  | 40062527  | C   | A | C | M      | intergenic | NA       | NA        | NA                     |
| 7285 | 11 | 45848329  | 45848329  | C   | T | C | Y      | exonic     | CRY2     | silent    | NM_021117:p.I469I      |
| 7285 | 11 | 48955295  | 48955295  | C   | A | C | M      | intergenic | NA       | NA        | NA                     |
| 7285 | 11 | 49898865  | 49898865  | A   | G | A | R      | intergenic | NA       | NA        | NA                     |
| 7285 | 11 | 51292860  | 51292860  | G   | T | G | K      | intergenic | NA       | NA        | NA                     |
| 7285 | 11 | 55000158  | 55000158  | C   | A | C | M      | intergenic | NA       | NA        | NA                     |
| 7285 | 11 | 55079104  | 55079104  | G   | T | G | K      | exonic     | OR4C15   | missense  | NM_001001920:p.G249V   |
| 7285 | 11 | 55409699  | 55409699  | G   | T | G | K      | exonic     | SPRYD5   | missense  | NM_032681:p.M73I       |
| 7285 | 11 | 55438329  | 55438329  | C   | A | C | M      | exonic     | OR5W2    | missense  | NM_001001960:p.L102F   |
| 7285 | 11 | 55684185  | 55684185  | G   | C | G | S      | exonic     | OR8K5    | missense  | NM_001004058:p.S62C    |
| 7285 | 11 | 55972891  | 55972891  | T   | A | T | W      | intronic   | OR8U8    | NA        | NA                     |
| 7285 | 11 | 56857645  | 56857645  | C   | A | C | M      | intronic   | SSRP1    | NA        | NA                     |
| 7285 | 11 | 60224901  | 60224901  | C   | T | C | Y      | intronic   | MS4A8B   | NA        | NA                     |
| 7285 | 11 | 62149981  | 62149981  | G   | A | G | R      | intronic   | GANAB    | NA        | NA                     |
| 7285 | 11 | 64320402  | 64320402  | C   | T | C | Y      | exonic     | MAP4K2   | missense  | NM_004579:p.G557D      |
| 7285 | 11 | 64923947  | 64923947  | G   | C | G | S      | intronic   | FRMD8    | NA        | NA                     |
| 7285 | 11 | 68320863  | 68320863  | G   | A | G | R      | intronic   | CPT1A    | NA        | NA                     |
| 7285 | 11 | 69848715  | 69848715  | C   | T | C | Y      | exonic     | PPFIA1   | silent    | NM_177423:p.L161L      |
| 7285 | 11 | 71617519  | 71617519  | C   | A | C | M      | exonic     | INPPL1   | silent    | NM_001567:p.P166P      |
| 7285 | 11 | 74468058  | 74468058  | A   | G | A | R      | intergenic | NA       | NA        | NA                     |
| 7285 | 11 | 79376672  | 79376672  | T   | A | T | W      | intergenic | NA       | NA        | NA                     |
| 7285 | 11 | 80042242  | 80042242  | A   | T | A | W      | intergenic | NA       | NA        | NA                     |
| 7285 | 11 | 85113401  | 85113401  | T   | C | T | Y      | exonic     | SYTL2    | missense  | NM_206928:p.T583A      |
| 7285 | 11 | 89366734  | 89366734  | G   | T | G | K      | ncRNA      | TRIM53   | NA        | NA                     |
| 7285 | 11 | 118275870 | 118275870 | C   | G | C | S      | exonic     | BCL9L    | silent    | NM_182557:p.L1124L     |
| 7285 | 11 | 120506029 | 120506029 | G   | A | G | R      | exonic     | TECTA    | missense  | NM_005422:p.G947E      |
| 7285 | 11 | 121989728 | 121989728 | G   | C | G | S      | intergenic | NA       | NA        | NA                     |
| 7285 | 11 | 123405810 | 123405810 | A   | G | A | R      | exonic     | OR10G8   | missense  | NM_001004464:p.I91V    |
| 7285 | 11 | 129280852 | 129280852 | A   | C | A | M      | intronic   | PRDM10   | NA        | NA                     |
| 7285 | 12 | 1983837   | 1983837   | C   | T | C | Y      | exonic     | DCP1B    | missense  | NM_152640:p.G8S        |
| 7285 | 12 | 6334849   | 6334849   | C   | A | C | M      | exonic     | SCNN1A   | missense  | NM_001159576:p.M390I   |
| 7285 | 12 | 6334850   | 6334850   | A   | T | A | W      | exonic     | SCNN1A   | missense  | NM_001159576:p.M390K   |

|      |    |           |           |   |   |   |      |            |            |          |                       |
|------|----|-----------|-----------|---|---|---|------|------------|------------|----------|-----------------------|
| 7285 | 12 | 7450339   | 7450339   | C | A | C | M    | intronic   | CD163L1    | NA       | NA                    |
| 7285 | 12 | 7872686   | 7872686   | G | T | G | K    | exonic     | SLC2A14    | missense | NM_153449:p.P209Q     |
| 7285 | 12 | 8680548   | 8680548   | G | T | G | K    | intergenic | NA         | NA       | NA                    |
| 7285 | 12 | 27034830  | 27034830  | G | A | G | R    | intronic   | TM7SF3     | NA       | NA                    |
| 7285 | 12 | 36883794  | 36883794  | G | C | G | S    | intergenic | NA         | NA       | NA                    |
| 7285 | 12 | 38266381  | 38266381  | G | A | G | R    | intronic   | ABCD2      | NA       | NA                    |
| 7285 | 12 | 39709362  | 39709362  | G | C | G | S    | intronic   | CNTN1      | NA       | NA                    |
| 7285 | 12 | 43752553  | 43752553  | C | A | C | M    | intergenic | NA         | NA       | NA                    |
| 7285 | 12 | 46820797  | 46820797  | T | A | T | W    | exonic     | PFKM       | missense | NM_000289:p.M406K     |
| 7285 | 12 | 46882728  | 46882728  | G | T | G | K    | exonic     | OR10AD1    | silent   | NM_001004134:p.I205I  |
| 7285 | 12 | 47646379  | 47646379  | C | A | C | M    | exonic     | WNT10B     | missense | NM_003394:p.E312D     |
| 7285 | 12 | 48787646  | 48787646  | T | A | T | W    | exonic     | GPD1       | nonsense | NM_005276:p.C214X     |
| 7285 | 12 | 49146975  | 49146975  | C | G | C | S    | intronic   | LARP4      | NA       | NA                    |
| 7285 | 12 | 53810354  | 53810354  | A | G | A | R    | exonic     | OR9K2      | missense | NM_001005243:p.I179V  |
| 7285 | 12 | 71333185  | 71333185  | G | T | G | K    | exonic     | TRHDE      | missense | NM_013381:p.W944L     |
| 7285 | 12 | 74733798  | 74733798  | G | T | G | K    | intronic   | NAP1L1     | NA       | NA                    |
| 7285 | 12 | 74733800  | 74733800  | A | G | A | R    | intronic   | NAP1L1     | NA       | NA                    |
| 7285 | 12 | 79626056  | 79626056  | C | T | C | Y    | exonic     | MYF6       | missense | NM_002469:p.R143W     |
| 7285 | 12 | 80057121  | 80057121  | A | G | A | R    | exonic     | ACSS3      | silent   | NM_024560:p.L242L     |
| 7285 | 12 | 83973515  | 83973515  | A | G | A | R    | exonic     | LRR1Q1     | silent   | NM_001079910:p.Q271Q  |
| 7285 | 12 | 89871754  | 89871754  | C | A | C | M    | exonic     | C12orf12   | missense | NM_152638:p.E299D     |
| 7285 | 12 | 94797563  | 94797563  | G | A | G | R    | exonic     | CCDC38     | nonsense | NM_182496:p.Q378X     |
| 7285 | 12 | 118109201 | 118109201 | T | C | T | Y    | intronic   | HSPB8      | NA       | NA                    |
| 7285 | 12 | 120435767 | 120435767 | C | T | C | Y    | intronic   | KDM2B      | NA       | NA                    |
| 7285 | 12 | 128129149 | 128129149 | T | A | T | W    | exonic     | TMEM132D   | silent   | NM_133448:p.T666T     |
| 7285 | 12 | 131706320 | 131706320 | C | T | C | Y    | intronic   | P2RX2      | NA       | NA                    |
| 7285 | 13 | 20792867  | 20792867  | G | C | G | S    | intergenic | NA         | NA       | NA                    |
| 7285 | 13 | 29244396  | 29244396  | A | T | A | W    | intronic   | UBL3       | NA       | NA                    |
| 7285 | 13 | 31643360  | 31643360  | A | G | A | R    | exonic     | FRY        | missense | NM_023037:p.T702A     |
| 7285 | 13 | 31994291  | 31994291  | T | C | T | Y    | intronic   | N4BP2L2    | NA       | NA                    |
| 7285 | 13 | 37218440  | 37218440  | G | A | G | R    | exonic     | TRPC4      | silent   | NM_001135955:p.N177N  |
| 7285 | 13 | 42794415  | 42794415  | A | G | A | R    | intronic   | ENOX1      | NA       | NA                    |
| 7285 | 13 | 70395844  | 70395844  | A | T | A | W    | intergenic | NA         | NA       | NA                    |
| 7285 | 13 | 77090195  | 77090195  | C | T | C | Y    | splicing   | SCEL       | nonsense | NM_003843:p.R523X     |
| 7285 | 13 | 108459479 | 108459479 | G | C | G | S    | intronic   | MYO16      | NA       | NA                    |
| 7285 | 13 | 112527787 | 112527787 | C | A | C | M    | exonic     | ATP11A     | silent   | NM_032189:p.I305I     |
| 7285 | 13 | 112820965 | 112820965 | T | C | T | Y    | exonic     | F7         | missense | NM_000131:p.L348P     |
| 7285 | 14 | 18184541  | 18184541  | G | A | G | R    | intergenic | NA         | NA       | NA                    |
| 7285 | 14 | 19318753  | 19318753  | G | A | G | R    | exonic     | OR4M1      | silent   | NM_001005500:p.L144L  |
| 7285 | 14 | 19572212  | 19572212  | G | A | G | R    | exonic     | OR4K13     | silent   | NM_001004714:p.P182P  |
| 7285 | 14 | 36250252  | 36250252  | T | C | T | Y    | intronic   | SLC25A21   | NA       | NA                    |
| 7285 | 14 | 41466821  | 41466821  | C | A | C | M    | intergenic | NA         | NA       | NA                    |
| 7285 | 14 | 50204394  | 50204394  | C | T | C | Y    | exonic     | SAV1       | silent   | NM_021818:p.P14P      |
| 7285 | 14 | 58181725  | 58181725  | T | C | T | Y    | intronic   | DACT1      | NA       | NA                    |
| 7285 | 14 | 73106248  | 73106248  | A | T | A | W    | exonic     | ACOT2      | missense | NM_006821:p.Q184L     |
| 7285 | 14 | 73823075  | 73823075  | G | A | G | R    | ncRNA      | ABCD4      | NA       | NA                    |
| 7285 | 14 | 93664020  | 93664020  | C | - | G | */-C | exonic     | IFI27L2    | FS_del   | NM_032036:p.A88fs     |
| 7285 | 14 | 94337569  | 94337569  | G | T | G | K    | intergenic | NA         | NA       | NA                    |
| 7285 | 14 | 96412126  | 96412126  | A | G | A | R    | exonic     | VRK1       | missense | NM_003384:p.K359E     |
| 7285 | 14 | 100520894 | 100520894 | A | T | A | W    | ncRNA      | SNORD114-2 | NA       | NA                    |
| 7285 | 15 | 19915231  | 19915231  | A | T | A | W    | ncRNA      | OR4N3P     | NA       | NA                    |
| 7285 | 15 | 20418998  | 20418998  | A | T | A | W    | exonic     | TUBGCP5    | missense | NM_052903:p.Q878L     |
| 7285 | 15 | 22705758  | 22705758  | C | A | C | M    | intronic   | SNRPN      | NA       | NA                    |
| 7285 | 15 | 22706140  | 22706140  | G | T | G | K    | intronic   | SNRPN      | NA       | NA                    |
| 7285 | 15 | 26129882  | 26129882  | T | A | T | W    | exonic     | HERC2      | missense | NM_004667:p.Q2310H    |
| 7285 | 15 | 27154497  | 27154497  | G | A | G | R    | splicing   | APBA2      | NA       | NA                    |
| 7285 | 15 | 27313376  | 27313376  | G | C | G | S    | intronic   | FAM189A1   | NA       | NA                    |
| 7285 | 15 | 28084793  | 28084793  | G | T | G | K    | intergenic | NA         | NA       | NA                    |
| 7285 | 15 | 32465058  | 32465058  | G | A | G | R    | ncRNA      | GOLGA8A    | NA       | NA                    |
| 7285 | 15 | 39647727  | 39647727  | A | G | A | R    | exonic     | TYRO3      | missense | NM_006293:p.N328D     |
| 7285 | 15 | 40243156  | 40243156  | T | C | T | Y    | exonic     | VPS39      | missense | NM_015289:p.I697V     |
| 7285 | 15 | 43484858  | 43484858  | G | C | G | S    | exonic     | SPATA511   | missense | NM_024063:p.V380L     |
| 7285 | 15 | 46835974  | 46835974  | T | C | T | Y    | exonic     | CEP152     | missense | NM_014985:p.I921M     |
| 7285 | 15 | 47446987  | 47446987  | G | A | G | R    | exonic     | C15orf33   | silent   | NM_152647:p.S407S     |
| 7285 | 15 | 50400821  | 50400821  | C | G | C | S    | intronic   | MYO5A      | NA       | NA                    |
| 7285 | 15 | 51794665  | 51794665  | T | C | T | Y    | intronic   | WDR72      | NA       | NA                    |
| 7285 | 15 | 53700143  | 53700143  | G | C | G | S    | intronic   | PRTG       | NA       | NA                    |
| 7285 | 15 | 58133420  | 58133420  | C | A | C | M    | intergenic | NA         | NA       | NA                    |
| 7285 | 15 | 60332190  | 60332190  | A | T | A | W    | intergenic | NA         | NA       | NA                    |
| 7285 | 15 | 66791007  | 66791007  | A | T | A | W    | exonic     | CORO2B     | missense | NM_001190457:p.M181L  |
| 7285 | 15 | 69244656  | 69244656  | A | G | A | R    | intronic   | THSD4      | NA       | NA                    |
| 7285 | 15 | 76814293  | 76814293  | G | A | G | R    | intergenic | NA         | NA       | NA                    |
| 7285 | 15 | 84112403  | 84112403  | C | G | C | S    | exonic     | KLHL25     | missense | NM_022480:p.G548A     |
| 7285 | 15 | 88785849  | 88785849  | C | G | C | S    | exonic     | IQGAP1     | missense | NM_003870:p.P253A     |
| 7285 | 15 | 90774346  | 90774346  | G | T | G | K    | splicing   | ST8SIA2    | NA       | NA                    |
| 7285 | 16 | 1755005   | 1755005   | C | G | C | S    | intronic   | MAPK8IP3   | NA       | NA                    |
| 7285 | 16 | 2786184   | 2786184   | C | A | C | M    | intergenic | NA         | NA       | NA                    |
| 7285 | 16 | 3004012   | 3004012   | C | A | C | M    | exonic     | CLDN9      | nonsense | NM_020982:p.Y216X     |
| 7285 | 16 | 9765091   | 9765091   | A | C | A | M    | exonic     | GRIN2A     | missense | NM_001134407:p.W1271G |

|      |    |          |          |   |   |   |      |            |           |             |                      |
|------|----|----------|----------|---|---|---|------|------------|-----------|-------------|----------------------|
| 7285 | 16 | 13927978 | 13927978 | C | T | C | Y    | exonic     | ERCC4     | missense    | NM_005236:p.R150C    |
| 7285 | 16 | 20279382 | 20279382 | G | T | G | K    | intronic   | PDILT     | NA          | NA                   |
| 7285 | 16 | 20330330 | 20330330 | T | C | T | Y    | exonic     | ACSM5     | missense    | NM_017888:p.L8P      |
| 7285 | 16 | 20401869 | 20401869 | T | C | T | Y    | intronic   | ACSM2A    | NA          | NA                   |
| 7285 | 16 | 32309684 | 32309684 | C | G | C | S    | intergenic | NA        | NA          | NA                   |
| 7285 | 16 | 32528718 | 32528718 | C | A | C | M    | intergenic | NA        | NA          | NA                   |
| 7285 | 16 | 47089880 | 47089880 | G | A | G | R    | intergenic | NA        | NA          | NA                   |
| 7285 | 16 | 49731751 | 49731751 | C | A | C | M    | exonic     | SALL1     | missense    | NM_001127892:p.G531V |
| 7285 | 16 | 54368282 | 54368282 | G | C | G | S    | intergenic | NA        | NA          | NA                   |
| 7285 | 16 | 54994435 | 54994435 | T | A | T | W    | exonic     | AMFR      | nonsense    | NM_001144:p.K313X    |
| 7285 | 16 | 56159275 | 56159275 | G | A | G | R    | exonic     | GPR114    | silent      | NM_153837:p.Q276Q    |
| 7285 | 16 | 57133655 | 57133655 | G | A | G | R    | exonic     | CNOT1     | missense    | NM_016284:p.P1554L   |
| 7285 | 16 | 63579651 | 63579651 | G | C | G | S    | exonic     | CDH11     | silent      | NM_001797:p.V303V    |
| 7285 | 16 | 65779191 | 65779191 | A | G | A | R    | exonic     | EXOC3L1   | silent      | NM_178516:p.L160L    |
| 7285 | 16 | 73541226 | 73541226 | G | A | G | R    | intronic   | WDR59     | NA          | NA                   |
| 7285 | 16 | 75950732 | 75950732 | G | T | G | K    | exonic     | ADAMTS18  | missense    | NM_199355:p.H436N    |
| 7285 | 16 | 76614072 | 76614072 | C | T | C | Y    | exonic     | CLEC3A    | silent      | NM_005752:p.L16L     |
| 7285 | 16 | 87398579 | 87398579 | G | A | G | R    | intronic   | CDT1      | NA          | NA                   |
| 7285 | 16 | 87399541 | 87399541 | G | T | G | K    | exonic     | CDT1      | missense    | NM_030928:p.M227I    |
| 7285 | 17 | 7520443  | 7520443  | A | - | G | *-/A | exonic     | TP53      | FS_del      | NM_001126113:p.L26fs |
| 7285 | 17 | 7622256  | 7622256  | G | T | G | K    | intronic   | DNAH2     | NA          | NA                   |
| 7285 | 17 | 8107152  | 8107152  | G | T | G | K    | splicing   | PFAS      | missense    | NM_012393:p.V471L    |
| 7285 | 17 | 10342693 | 10342693 | G | A | G | R    | exonic     | MYH1      | missense    | NM_005963:p.R1386C   |
| 7285 | 17 | 14189688 | 14189688 | A | G | A | R    | exonic     | HS3ST3B1  | stoploss SN | NM_006041:p.X391W    |
| 7285 | 17 | 30290291 | 30290291 | T | C | T | Y    | intronic   | CCT6B     | NA          | NA                   |
| 7285 | 17 | 40202810 | 40202810 | A | T | A | W    | intronic   | ADAM11    | NA          | NA                   |
| 7285 | 17 | 43272442 | 43272442 | G | C | G | S    | intronic   | SCRN2     | NA          | NA                   |
| 7285 | 17 | 50439923 | 50439923 | C | T | C | Y    | exonic     | STXBP4    | missense    | NM_178509:p.P211L    |
| 7285 | 17 | 53924943 | 53924943 | G | A | G | R    | exonic     | MTMR4     | missense    | NM_004687:p.P1113L   |
| 7285 | 17 | 58027619 | 58027619 | G | C | G | S    | intronic   | TLK2      | NA          | NA                   |
| 7285 | 17 | 78137519 | 78137519 | G | A | G | R    | intronic   | FO XK2    | NA          | NA                   |
| 7285 | 17 | 78383528 | 78383528 | G | T | G | K    | exonic     | ZNF750    | missense    | NM_024702:p.P31H     |
| 7285 | 18 | 70145    | 70145    | C | G | C | S    | intergenic | NA        | NA          | NA                   |
| 7285 | 18 | 336550   | 336550   | G | A | G | R    | exonic     | COLEC12   | missense    | NM_130386:p.R358W    |
| 7285 | 18 | 35168979 | 35168979 | A | G | A | R    | ncRNA      | LOC647946 | NA          | NA                   |
| 7285 | 18 | 46829184 | 46829184 | G | T | G | K    | exonic     | SMAD4     | missense    | NM_005359:p.C127F    |
| 7285 | 18 | 48846516 | 48846516 | C | A | C | M    | exonic     | DCC       | missense    | NM_005215:p.L415I    |
| 7285 | 18 | 75760477 | 75760477 | C | G | C | G    | exonic     | KCNG2     | silent      | NM_012283:p.A358A    |
| 7285 | 19 | 12158059 | 12158059 | G | T | G | K    | intronic   | ZNF136    | NA          | NA                   |
| 7285 | 19 | 12920689 | 12920689 | G | A | G | R    | intronic   | RAD23A    | NA          | NA                   |
| 7285 | 19 | 13854704 | 13854704 | T | C | T | Y    | exonic     | C19orf57  | missense    | NM_024323:p.T609A    |
| 7285 | 19 | 14875116 | 14875116 | C | T | C | Y    | intergenic | NA        | NA          | NA                   |
| 7285 | 19 | 20369973 | 20369973 | A | T | A | W    | downstream | ZNF826P   | NA          | NA                   |
| 7285 | 19 | 21319316 | 21319316 | C | A | C | M    | intergenic | NA        | NA          | NA                   |
| 7285 | 19 | 21350562 | 21350562 | A | T | A | W    | ncRNA      | ZNF738    | NA          | NA                   |
| 7285 | 19 | 21702622 | 21702622 | G | A | G | R    | exonic     | ZNF100    | missense    | NM_173531:p.S111F    |
| 7285 | 19 | 21947084 | 21947084 | T | C | T | Y    | exonic     | ZNF208    | silent      | NM_007153:p.E864E    |
| 7285 | 19 | 22155869 | 22155869 | T | C | T | Y    | exonic     | ZNF676    | missense    | NM_001001411:p.T164A |
| 7285 | 19 | 22660865 | 22660865 | G | T | G | K    | intergenic | NA        | NA          | NA                   |
| 7285 | 19 | 22951726 | 22951726 | G | A | G | R    | intergenic | NA        | NA          | NA                   |
| 7285 | 19 | 41218123 | 41218123 | T | G | T | K    | UTR3       | THAP8     | NA          | NA                   |
| 7285 | 19 | 53326247 | 53326247 | C | G | C | S    | intronic   | LIG1      | NA          | NA                   |
| 7285 | 19 | 57579861 | 57579861 | C | A | C | M    | exonic     | ZNF880    | missense    | NM_001145434:p.Q406K |
| 7285 | 19 | 57749605 | 57749605 | A | G | A | R    | exonic     | ZNF808    | missense    | NM_001039886:p.T542A |
| 7285 | 19 | 59981770 | 59981770 | C | T | C | Y    | intronic   | KIR2DL1   | NA          | NA                   |
| 7285 | 19 | 61617551 | 61617551 | G | C | G | S    | exonic     | ZNF583    | silent      | NM_001159861:p.V54V  |
| 7285 | 19 | 62750248 | 62750248 | G | C | G | S    | exonic     | ZNF550    | missense    | NM_001039654:p.I351M |
| 7285 | 19 | 62993433 | 62993433 | C | T | C | Y    | intergenic | NA        | NA          | NA                   |
| 7285 | 20 | 338561   | 338561   | C | T | C | Y    | exonic     | RBCK1     | missense    | NM_031229:p.A20V     |
| 7285 | 20 | 1480450  | 1480450  | C | A | C | M    | exonic     | SIRPD     | missense    | NM_178460:p.R103L    |
| 7285 | 20 | 7760895  | 7760895  | A | G | A | R    | intergenic | NA        | NA          | NA                   |
| 7285 | 20 | 8626364  | 8626364  | A | G | A | R    | exonic     | PLCB1     | silent      | NM_182734:p.G367G    |
| 7285 | 20 | 9337715  | 9337715  | G | C | G | S    | exonic     | PLCB4     | missense    | NM_182797:p.R617P    |
| 7285 | 20 | 13715997 | 13715997 | A | T | A | W    | splicing   | C20orf7   | nonsense    | NM_024120:p.R88X     |
| 7285 | 20 | 17116861 | 17116861 | G | C | G | S    | intergenic | NA        | NA          | NA                   |
| 7285 | 20 | 21635111 | 21635111 | G | C | G | S    | exonic     | PAX1      | missense    | NM_006192:p.V108L    |
| 7285 | 20 | 28260020 | 28260020 | G | A | G | R    | intergenic | NA        | NA          | NA                   |
| 7285 | 20 | 30019907 | 30019907 | T | C | T | Y    | exonic     | XKR7      | missense    | NM_001011718:p.F90L  |
| 7285 | 20 | 31137538 | 31137538 | T | C | T | Y    | exonic     | C20orf186 | missense    | NM_182519:p.V278A    |
| 7285 | 20 | 31461635 | 31461635 | G | T | G | K    | exonic     | SNTA1     | silent      | NM_003098:p.R402R    |
| 7285 | 20 | 31674578 | 31674578 | C | A | C | M    | intronic   | CBFA2T2   | NA          | NA                   |
| 7285 | 20 | 32792987 | 32792987 | T | C | T | Y    | exonic     | NCOA6     | silent      | NM_014071:p.V1578V   |
| 7285 | 20 | 46758404 | 46758404 | A | G | A | R    | intronic   | PREX1     | NA          | NA                   |
| 7285 | 20 | 47045773 | 47045773 | C | G | C | S    | exonic     | ARFGEF2   | missense    | NM_006420:p.F1056L   |
| 7285 | 20 | 49566879 | 49566879 | G | T | G | K    | exonic     | NFATC2    | missense    | NM_001136021:p.P375T |
| 7285 | 20 | 59945261 | 59945261 | G | T | G | K    | exonic     | CDH4      | silent      | NM_001794:p.G872G    |
| 7285 | 20 | 60201970 | 60201970 | G | T | G | K    | exonic     | GTPBP5    | silent      | NM_015666:p.R33R     |
| 7285 | 21 | 9966651  | 9966651  | G | T | G | K    | exonic     | TPTE      | missense    | NM_199260:p.Q114K    |
| 7285 | 21 | 10037030 | 10037030 | C | A | C | M    | intergenic | NA        | NA          | NA                   |

|      |    |           |           |   |   |   |      |            |          |          |                       |
|------|----|-----------|-----------|---|---|---|------|------------|----------|----------|-----------------------|
| 7285 | 21 | 10094496  | 10094496  | G | T | G | K    | intronic   | BAGE     | NA       | NA                    |
| 7285 | 21 | 21580615  | 21580615  | G | C | G | S    | intronic   | NCAM2    | NA       | NA                    |
| 7285 | 21 | 22732106  | 22732106  | T | C | T | Y    | intergenic | NA       | NA       | NA                    |
| 7285 | 22 | 14456076  | 14456076  | C | T | C | Y    | intergenic | NA       | NA       | NA                    |
| 7285 | 22 | 15364275  | 15364275  | T | A | T | W    | intergenic | NA       | NA       | NA                    |
| 7285 | 22 | 15364276  | 15364276  | T | C | T | Y    | intergenic | NA       | NA       | NA                    |
| 7285 | 22 | 19687354  | 19687354  | C | G | C | S    | ncRNA      | FLJ39582 | NA       | NA                    |
| 7285 | 22 | 20994063  | 20994063  | G | T | G | K    | ncRNA      | LOC96610 | NA       | NA                    |
| 7285 | 22 | 30918958  | 30918958  | G | T | G | K    | exonic     | RFPL2    | missense | NM_006605:p.H102N     |
| 7285 | 22 | 41988706  | 41988706  | C | T | C | Y    | exonic     | SCUBE1   | missense | NM_173050:p.G192S     |
| 7285 | 22 | 49268058  | 49268058  | G | A | G | R    | exonic     | ADM2     | missense | NM_024866:p.A103T     |
| 7285 | 22 | 49411471  | 49411471  | A | - | G | *-/A | exonic     | ARSA     | FS_del   | NM_001085427:p.F319fs |
| 7285 | X  | 7849828   | 7849828   | C | A | C | M    | exonic     | PNPLA4   | missense | NM_001172672:p.V26L   |
| 7285 | X  | 18129924  | 18129924  | G | T | G | K    | exonic     | BEND2    | missense | NM_153346:p.P322Q     |
| 7285 | X  | 18829554  | 18829554  | G | A | G | R    | exonic     | PHKA2    | silent   | NM_000292:p.G999G     |
| 7285 | X  | 31406370  | 31406370  | A | G | A | R    | exonic     | DMD      | missense | NM_004020:p.L444P     |
| 7285 | X  | 34058124  | 34058124  | G | A | G | R    | exonic     | FAM47A   | silent   | NM_203408:p.D731D     |
| 7285 | X  | 37820711  | 37820711  | T | A | T | W    | intronic   | SYTL5    | NA       | NA                    |
| 7285 | X  | 45696601  | 45696601  | A | G | A | G    | intergenic | NA       | NA       | NA                    |
| 7285 | X  | 48991685  | 48991685  | C | T | C | T    | exonic     | CCDC22   | silent   | NM_014008:p.P394P     |
| 7285 | X  | 49257714  | 49257714  | T | G | T | K    | UTR3       | GAGE1    | NA       | NA                    |
| 7285 | X  | 49319792  | 49319792  | G | C | G | S    | intergenic | NA       | NA       | NA                    |
| 7285 | X  | 50069448  | 50069448  | C | A | C | M    | exonic     | CCNB3    | silent   | NM_033031:p.T513T     |
| 7285 | X  | 51682128  | 51682128  | A | T | A | W    | intergenic | NA       | NA       | NA                    |
| 7285 | X  | 53659397  | 53659397  | C | G | C | S    | intronic   | HUWE1    | NA       | NA                    |
| 7285 | X  | 64545033  | 64545033  | A | G | A | R    | intergenic | NA       | NA       | NA                    |
| 7285 | X  | 74719810  | 74719810  | C | T | C | Y    | intergenic | NA       | NA       | NA                    |
| 7285 | X  | 83897097  | 83897097  | G | A | G | R    | intergenic | NA       | NA       | NA                    |
| 7285 | X  | 86777405  | 86777405  | C | T | C | Y    | exonic     | KLHL4    | silent   | NM_019117:p.C633C     |
| 7285 | X  | 92365968  | 92365968  | C | T | C | Y    | intergenic | NA       | NA       | NA                    |
| 7285 | X  | 106072678 | 106072678 | C | T | C | Y    | exonic     | MORC4    | missense | NM_001085354:p.G700D  |
| 7285 | X  | 107569185 | 107569185 | A | G | A | R    | intronic   | COL4A6   | NA       | NA                    |
| 7285 | X  | 109581237 | 109581237 | C | A | C | M    | exonic     | RGAG1    | missense | NM_020769:p.L246I     |
| 7285 | X  | 118855966 | 118855966 | C | A | C | M    | exonic     | UPF3B    | nonsense | NM_023010:p.E349X     |
| 7285 | X  | 120165488 | 120165488 | A | G | A | R    | intergenic | NA       | NA       | NA                    |
| 7285 | X  | 129177777 | 129177777 | C | G | C | G    | intronic   | ZNF280C  | NA       | NA                    |
| 7285 | X  | 144520046 | 144520046 | C | A | C | M    | intergenic | NA       | NA       | NA                    |
| 7285 | X  | 150520694 | 150520694 | G | T | G | K    | exonic     | PASD1    | missense | NM_173493:p.G5W       |
| 7285 | X  | 150663306 | 150663306 | G | A | G | R    | exonic     | CNGA2    | missense | NM_005140:p.A559T     |
| 7285 | X  | 153829357 | 153829357 | A | G | A | R    | exonic     | F8       | silent   | NM_000132:p.F641F     |
| 7285 | Y  | 11784056  | 11784056  | A | T | A | W    | intergenic | NA       | NA       | NA                    |
| 7285 | Y  | 12011713  | 12011713  | T | C | T | Y    | intergenic | NA       | NA       | NA                    |
| 7285 | M  | 2555      | 2555      | G | A | G | R    | intergenic | NA       | NA       | NA                    |
| 7313 | 1  | 9756045   | 9756045   | T | C | T | Y    | intronic   | CLSTN1   | NA       | NA                    |
| 7313 | 1  | 16598463  | 16598463  | G | T | G | K    | exonic     | SPATA21  | missense | NM_198546:p.R439S     |
| 7313 | 1  | 17221745  | 17221745  | G | A | G | R    | exonic     | SDHB     | missense | NM_003000:p.P237L     |
| 7313 | 1  | 19396789  | 19396789  | C | A | C | M    | exonic     | UBR4     | missense | NM_020765:p.M285I     |
| 7313 | 1  | 20886650  | 20886650  | C | A | C | S    | exonic     | KIF17    | missense | NM_001122819:p.A586P  |
| 7313 | 1  | 24101076  | 24101076  | G | A | G | R    | intronic   | CNR2     | NA       | NA                    |
| 7313 | 1  | 34030745  | 34030745  | C | A | C | M    | intronic   | CSMD2    | NA       | NA                    |
| 7313 | 1  | 35977688  | 35977688  | G | A | G | R    | exonic     | CLSPN    | missense | NM_001190481:p.A994V  |
| 7313 | 1  | 37794497  | 37794497  | G | A | G | R    | upstream   | DNALI1   | NA       | NA                    |
| 7313 | 1  | 43587500  | 43587500  | C | G | C | S    | intronic   | MPL      | NA       | NA                    |
| 7313 | 1  | 63102415  | 63102415  | T | G | T | K    | exonic     | ATG4C    | silent   | NM_032852:p.L458L     |
| 7313 | 1  | 65428913  | 65428913  | A | C | A | M    | intronic   | AK4      | NA       | NA                    |
| 7313 | 1  | 70224525  | 70224525  | T | A | T | W    | exonic     | LRRC7    | missense | NM_020794:p.L229I     |
| 7313 | 1  | 75475386  | 75475386  | C | G | C | S    | intronic   | SLC44A5  | NA       | NA                    |
| 7313 | 1  | 76032631  | 76032631  | G | C | G | S    | intronic   | RABGGTB  | NA       | NA                    |
| 7313 | 1  | 85179260  | 85179260  | G | C | G | S    | exonic     | MCOLN2   | missense | NM_153259:p.Q284E     |
| 7313 | 1  | 96685106  | 96685106  | C | G | C | S    | intergenic | NA       | NA       | NA                    |
| 7313 | 1  | 103152551 | 103152551 | T | A | T | W    | splicing   | COL11A1  | NA       | NA                    |
| 7313 | 1  | 103152552 | 103152552 | A | G | A | R    | intronic   | COL11A1  | NA       | NA                    |
| 7313 | 1  | 103217257 | 103217257 | G | T | G | K    | intronic   | COL11A1  | NA       | NA                    |
| 7313 | 1  | 106235102 | 106235102 | T | A | T | W    | intergenic | NA       | NA       | NA                    |
| 7313 | 1  | 111240846 | 111240846 | C | T | C | Y    | exonic     | CD53     | missense | NM_000560:p.P158S     |
| 7313 | 1  | 118425697 | 118425697 | C | T | C | Y    | exonic     | SPAG17   | silent   | NM_206996:p.L618L     |
| 7313 | 1  | 144171597 | 144171597 | T | A | T | W    | UTR5       | POLR3GL  | NA       | NA                    |
| 7313 | 1  | 148397755 | 148397755 | G | A | G | R    | exonic     | PLEKH01  | missense | NM_016274:p.V215M     |
| 7313 | 1  | 154104595 | 154104595 | G | C | G | S    | exonic     | SYT11    | missense | NM_152280:p.G84R      |
| 7313 | 1  | 155946803 | 155946803 | C | G | C | S    | intergenic | NA       | NA       | NA                    |
| 7313 | 1  | 156413738 | 156413738 | C | G | C | S    | intergenic | NA       | NA       | NA                    |
| 7313 | 1  | 156760968 | 156760968 | A | G | A | R    | intergenic | NA       | NA       | NA                    |
| 7313 | 1  | 157078677 | 157078677 | C | T | C | Y    | exonic     | MNDA     | missense | NM_002432:p.T37I      |
| 7313 | 1  | 159762700 | 159762700 | C | A | C | M    | exonic     | HSPA6    | nonsense | NM_002155:p.S543X     |
| 7313 | 1  | 163780453 | 163780453 | G | T | G | K    | exonic     | LRRC52   | missense | NM_001005214:p.G99V   |
| 7313 | 1  | 167612560 | 167612560 | C | T | C | Y    | exonic     | BLZF1    | missense | NM_003666:p.L63F      |
| 7313 | 1  | 172145404 | 172145404 | G | A | G | R    | exonic     | SERPINC1 | silent   | NM_000488:p.R354R     |
| 7313 | 1  | 172146707 | 172146707 | A | T | A | W    | intronic   | SERPINC1 | NA       | NA                    |
| 7313 | 1  | 174316912 | 174316912 | T | C | T | Y    | splicing   | RFWD2    | missense | NM_022457:p.S426G     |



|      |   |           |           |   |   |   |   |            |            |          |                      |
|------|---|-----------|-----------|---|---|---|---|------------|------------|----------|----------------------|
| 7313 | 1 | 177321625 | 177321625 | C | T | C | Y | exonic     | TOR3A      | missense | NM_022371:p.H205Y    |
| 7313 | 1 | 177419952 | 177419952 | A | G | A | R | intronic   | ABL2       | NA       | NA                   |
| 7313 | 1 | 177800576 | 177800576 | T | C | T | Y | intronic   | NPHS2      | NA       | NA                   |
| 7313 | 1 | 183058985 | 183058985 | C | A | C | M | exonic     | FAM129A    | silent   | NM_052966:p.T308T    |
| 7313 | 1 | 195219775 | 195219775 | G | T | G | K | exonic     | CFHR5      | silent   | NM_030787:p.L105L    |
| 7313 | 1 | 195288387 | 195288387 | C | G | C | S | splicing   | F13B       | missense | NM_001994:p.E519Q    |
| 7313 | 1 | 195333381 | 195333381 | G | A | G | R | intronic   | ASPM       | NA       | NA                   |
| 7313 | 1 | 195665163 | 195665163 | G | A | G | R | intronic   | CRB1       | NA       | NA                   |
| 7313 | 1 | 215859949 | 215859949 | T | G | T | K | exonic     | GPATCH2    | missense | NM_018040:p.Q191P    |
| 7313 | 1 | 216570957 | 216570957 | T | A | T | W | exonic     | RRP15      | silent   | NM_016052:p.R250R    |
| 7313 | 1 | 220864852 | 220864852 | A | G | A | R | intronic   | MIA3       | NA       | NA                   |
| 7313 | 1 | 222047706 | 222047706 | C | T | C | Y | exonic     | TP53BP2    | silent   | NM_005426:p.V799V    |
| 7313 | 1 | 226945979 | 226945979 | G | A | G | R | exonic     | RHOU       | missense | NM_021205:p.D216N    |
| 7313 | 1 | 227838831 | 227838831 | G | T | G | K | exonic     | URB2       | silent   | NM_014777:p.V616V    |
| 7313 | 1 | 229473156 | 229473156 | G | T | G | K | exonic     | GNPAT      | missense | NM_014236:p.A437S    |
| 7313 | 1 | 232666292 | 232666292 | T | A | T | W | exonic     | TARBP1     | missense | NM_005646:p.Q438L    |
| 7313 | 1 | 238374799 | 238374799 | C | T | C | Y | intronic   | FMN2       | NA       | NA                   |
| 7313 | 1 | 239792307 | 239792307 | G | C | G | S | intronic   | KMO        | NA       | NA                   |
| 7313 | 1 | 241802912 | 241802912 | G | T | G | K | exonic     | AKT3       | missense | NM_005465:p.A253E    |
| 7313 | 1 | 246220301 | 246220301 | C | A | C | M | ncRNA      | OR2L1P     | NA       | NA                   |
| 7313 | 1 | 246220528 | 246220528 | G | T | G | K | ncRNA      | OR2L1P     | NA       | NA                   |
| 7313 | 1 | 246233807 | 246233807 | A | G | A | R | intronic   | OR2L13     | NA       | NA                   |
| 7313 | 1 | 246290597 | 246290597 | C | A | C | M | intronic   | OR2L13     | NA       | NA                   |
| 7313 | 1 | 246313562 | 246313562 | C | A | C | M | intronic   | OR2L13     | NA       | NA                   |
| 7313 | 1 | 246410259 | 246410259 | G | C | G | S | exonic     | OR2M2      | missense | NM_001004688:p.V117L |
| 7313 | 2 | 25024173  | 25024173  | T | A | T | W | intronic   | DNAJC27    | NA       | NA                   |
| 7313 | 2 | 26267721  | 26267721  | G | A | G | R | exonic     | HADHA      | missense | NM_000182:p.R732W    |
| 7313 | 2 | 37159879  | 37159879  | G | C | G | S | exonic     | HEATR5B    | missense | NM_019024:p.L76V     |
| 7313 | 2 | 38071975  | 38071975  | A | T | A | W | intronic   | FAM82A1    | NA       | NA                   |
| 7313 | 2 | 47771470  | 47771470  | C | A | C | M | intergenic | NA         | NA       | NA                   |
| 7313 | 2 | 48661858  | 48661858  | C | T | C | Y | exonic     | STON1      | silent   | NM_006873:p.S194S    |
| 7313 | 2 | 78493582  | 78493582  | G | C | G | S | intergenic | NA         | NA       | NA                   |
| 7313 | 2 | 79238974  | 79238974  | G | C | G | S | exonic     | REG3A      | missense | NM_138938:p.H107D    |
| 7313 | 2 | 79238975  | 79238975  | G | T | G | K | exonic     | REG3A      | silent   | NM_138938:p.L106L    |
| 7313 | 2 | 84858052  | 84858052  | A | T | A | W | intronic   | DNAH6      | NA       | NA                   |
| 7313 | 2 | 86197773  | 86197773  | A | G | A | R | exonic     | PTCD3      | missense | NM_017952:p.I132V    |
| 7313 | 2 | 87210695  | 87210695  | G | T | G | K | intergenic | NA         | NA       | NA                   |
| 7313 | 2 | 91411274  | 91411274  | T | A | T | W | intergenic | NA         | NA       | NA                   |
| 7313 | 2 | 104378731 | 104378731 | G | T | G | K | ncRNA      | LOC1002870 | NA       | NA                   |
| 7313 | 2 | 113546768 | 113546768 | G | C | G | S | UTR5       | IL1F10     | NA       | NA                   |
| 7313 | 2 | 131169504 | 131169504 | G | C | G | S | intergenic | NA         | NA       | NA                   |
| 7313 | 2 | 132085614 | 132085614 | G | T | G | K | ncRNA      | POTEK1     | NA       | NA                   |
| 7313 | 2 | 135333373 | 135333373 | C | A | C | M | exonic     | ACMSD      | missense | NM_138326:p.R59S     |
| 7313 | 2 | 136281421 | 136281421 | C | A | C | M | exonic     | LCT        | missense | NM_002299:p.G1307V   |
| 7313 | 2 | 136803611 | 136803611 | G | T | G | K | intergenic | NA         | NA       | NA                   |
| 7313 | 2 | 139376191 | 139376191 | C | A | C | M | intergenic | NA         | NA       | NA                   |
| 7313 | 2 | 141468136 | 141468136 | C | A | C | M | exonic     | LRP1B      | nonsense | NM_018557:p.G848X    |
| 7313 | 2 | 153283551 | 153283551 | G | C | G | S | exonic     | ARL6IP6    | missense | NM_152522:p.R56P     |
| 7313 | 2 | 159820980 | 159820980 | C | G | C | S | exonic     | WDSUB1     | missense | NM_001128213:p.E369Q |
| 7313 | 2 | 159822617 | 159822617 | C | G | C | S | exonic     | WDSUB1     | missense | NM_001128213:p.V284L |
| 7313 | 2 | 159822697 | 159822697 | C | A | C | M | intronic   | WDSUB1     | NA       | NA                   |
| 7313 | 2 | 160585072 | 160585072 | G | A | G | R | intronic   | PLA2R1     | NA       | NA                   |
| 7313 | 2 | 162069915 | 162069915 | C | A | C | M | intergenic | NA         | NA       | NA                   |
| 7313 | 2 | 171925299 | 171925299 | G | T | G | K | intronic   | METTL8     | NA       | NA                   |
| 7313 | 2 | 175691002 | 175691002 | A | G | R | K | exonic     | ATF2       | missense | NM_001880:p.P137S    |
| 7313 | 2 | 177807179 | 177807179 | C | G | C | S | exonic     | NFE2L2     | missense | NM_001145412:p.D22H  |
| 7313 | 2 | 179051474 | 179051474 | G | C | G | S | ncRNA      | MIR548N    | NA       | NA                   |
| 7313 | 2 | 185509270 | 185509270 | G | T | G | K | exonic     | ZNF804A    | missense | NM_194250:p.S301I    |
| 7313 | 2 | 189056359 | 189056359 | A | C | A | M | intronic   | GULP1      | NA       | NA                   |
| 7313 | 2 | 189648475 | 189648475 | C | T | C | Y | intronic   | COL5A2     | NA       | NA                   |
| 7313 | 2 | 209001127 | 209001127 | G | T | G | K | intronic   | PTH2R      | NA       | NA                   |
| 7313 | 2 | 209752301 | 209752301 | G | C | G | S | intergenic | NA         | NA       | NA                   |
| 7313 | 2 | 210876501 | 210876501 | T | A | T | W | intronic   | MYL1       | NA       | NA                   |
| 7313 | 2 | 241714553 | 241714553 | C | A | C | M | exonic     | PASK       | missense | NM_015148:p.C817F    |
| 7313 | 3 | 9940689   | 9940689   | G | A | G | R | exonic     | IL17RC     | missense | NM_032732:p.H234Q    |
| 7313 | 3 | 18394629  | 18394629  | C | A | C | M | intronic   | SATB1      | NA       | NA                   |
| 7313 | 3 | 38735180  | 38735180  | C | A | C | M | exonic     | SCN10A     | missense | NM_006514:p.A1217S   |
| 7313 | 3 | 46376283  | 46376283  | C | G | C | S | exonic     | CCR2       | silent   | NM_001123041:p.L351L |
| 7313 | 3 | 47280936  | 47280936  | T | G | T | K | intronic   | KIF9       | NA       | NA                   |
| 7313 | 3 | 86015129  | 86015129  | A | T | A | W | splicing   | CADM2      | NA       | NA                   |
| 7313 | 3 | 95075874  | 95075874  | C | A | C | M | exonic     | PROS1      | missense | NM_000313:p.G646C    |
| 7313 | 3 | 95216660  | 95216660  | C | G | C | S | exonic     | STX19      | missense | NM_001001850:p.E48D  |
| 7313 | 3 | 95277694  | 95277694  | A | T | A | W | intronic   | NSUN3      | NA       | NA                   |
| 7313 | 3 | 97869674  | 97869674  | G | T | G | K | intergenic | NA         | NA       | NA                   |
| 7313 | 3 | 99370213  | 99370213  | T | C | T | Y | upstream   | OR5H15     | NA       | NA                   |
| 7313 | 3 | 99860272  | 99860272  | C | A | C | M | intergenic | NA         | NA       | NA                   |
| 7313 | 3 | 103056536 | 103056536 | A | G | A | R | intronic   | NFKBIZ     | NA       | NA                   |
| 7313 | 3 | 109006846 | 109006846 | C | T | C | Y | intronic   | BBX        | NA       | NA                   |
| 7313 | 3 | 109958594 | 109958594 | A | G | A | R | splicing   | RETNLB     | NA       | NA                   |

|      |   |           |           |   |   |   |      |            |            |          |                       |
|------|---|-----------|-----------|---|---|---|------|------------|------------|----------|-----------------------|
| 7313 | 3 | 110305434 | 110305434 | C | A | C | M    | exonic     | MORC1      | missense | NM_014429:p.G59W      |
| 7313 | 3 | 111884652 | 111884652 | C | A | C | M    | intergenic | NA         | NA       | NA                    |
| 7313 | 3 | 120130116 | 120130116 | G | C | G | S    | exonic     | IGSF11     | nonsense | NM_152538:p.Y117X     |
| 7313 | 3 | 122452357 | 122452357 | A | T | A | W    | intronic   | STXBP5L    | NA       | NA                    |
| 7313 | 3 | 122583057 | 122583057 | G | A | G | R    | exonic     | STXBP5L    | missense | NM_014980:p.V883I     |
| 7313 | 3 | 125692946 | 125692946 | T | A | T | W    | exonic     | KALRN      | missense | NM_001024660:p.N1556K |
| 7313 | 3 | 130730373 | 130730373 | A | T | A | W    | exonic     | RHO        | missense | NM_000539:p.Q36L      |
| 7313 | 3 | 132363869 | 132363869 | T | C | T | Y    | intronic   | NEK11      | NA       | NA                    |
| 7313 | 3 | 133665134 | 133665134 | G | T | G | K    | intronic   | DNAJC13    | NA       | NA                    |
| 7313 | 3 | 139599043 | 139599043 | G | C | G | S    | intronic   | MRAS       | NA       | NA                    |
| 7313 | 3 | 152555605 | 152555605 | A | T | A | W    | exonic     | MED12L     | missense | NM_053002:p.D767V     |
| 7313 | 3 | 156347753 | 156347753 | G | T | G | K    | intronic   | MME        | NA       | NA                    |
| 7313 | 3 | 158695645 | 158695645 | C | T | C | Y    | intronic   | VEPH1      | NA       | NA                    |
| 7313 | 3 | 166182882 | 166182882 | G | T | G | K    | exonic     | SI         | missense | NM_001041:p.T1753K    |
| 7313 | 3 | 166233100 | 166233100 | G | T | G | K    | exonic     | SI         | silent   | NM_001041:p.I880I     |
| 7313 | 3 | 180824488 | 180824488 | T | A | T | W    | exonic     | NDUFB5     | missense | NM_001199957:p.I127N  |
| 7313 | 3 | 187918160 | 187918160 | C | A | C | M    | exonic     | KNG1       | missense | NM_000893:p.N45K      |
| 7313 | 3 | 188925329 | 188925329 | G | C | G | S    | ncRNA      | LOC1001316 | NA       | NA                    |
| 7313 | 3 | 188925331 | 188925331 | C | T | C | Y    | ncRNA      | LOC1001316 | NA       | NA                    |
| 7313 | 3 | 192419548 | 192419548 | A | T | A | W    | intronic   | OSTN       | NA       | NA                    |
| 7313 | 3 | 194355923 | 194355923 | G | C | G | S    | intergenic | NA         | NA       | NA                    |
| 7313 | 4 | 2847554   | 2847554   | G | A | G | R    | exonic     | ADD1       | silent   | NM_014189:p.E38E      |
| 7313 | 4 | 48741575  | 48741575  | G | T | G | K    | exonic     | CWH43      | missense | NM_025087:p.D607Y     |
| 7313 | 4 | 48817707  | 48817707  | T | A | T | W    | intergenic | NA         | NA       | NA                    |
| 7313 | 4 | 56425132  | 56425132  | T | C | T | Y    | intronic   | EXOC1      | NA       | NA                    |
| 7313 | 4 | 58664246  | 58664246  | C | A | C | M    | intergenic | NA         | NA       | NA                    |
| 7313 | 4 | 63898420  | 63898420  | C | A | C | M    | intergenic | NA         | NA       | NA                    |
| 7313 | 4 | 72850093  | 72850093  | C | A | C | M    | exonic     | GC         | missense | NM_000583:p.Q131H     |
| 7313 | 4 | 77879581  | 77879581  | C | T | C | Y    | exonic     | SHROOM3    | missense | NM_020859:p.R411W     |
| 7313 | 4 | 88796634  | 88796634  | G | T | G | K    | intronic   | DMP1       | NA       | NA                    |
| 7313 | 4 | 111759101 | 111759101 | G | T | G | K    | exonic     | PITX2      | missense | NM_000325:p.P202T     |
| 7313 | 4 | 116217169 | 116217169 | C | A | C | M    | exonic     | NDST4      | missense | NM_022569:p.S158I     |
| 7313 | 4 | 117184231 | 117184231 | C | A | C | M    | intergenic | NA         | NA       | NA                    |
| 7313 | 4 | 120396971 | 120396971 | G | A | G | R    | intronic   | USP53      | NA       | NA                    |
| 7313 | 4 | 122177037 | 122177037 | G | T | G | K    | exonic     | C4orf31    | silent   | NM_024574:p.V513V     |
| 7313 | 4 | 122186233 | 122186233 | G | C | G | S    | intronic   | C4orf31    | NA       | NA                    |
| 7313 | 4 | 123328052 | 123328052 | G | T | G | K    | exonic     | KIAA1109   | nonsense | NM_015312:p.E188X     |
| 7313 | 4 | 123422327 | 123422327 | A | G | A | R    | exonic     | KIAA1109   | silent   | NM_015312:p.P2995P    |
| 7313 | 4 | 136187408 | 136187408 | G | T | G | K    | intergenic | NA         | NA       | NA                    |
| 7313 | 4 | 137495908 | 137495908 | C | A | C | M    | intergenic | NA         | NA       | NA                    |
| 7313 | 4 | 155726590 | 155726590 | C | A | C | M    | exonic     | FGA        | nonsense | NM_000508:p.E481X     |
| 7313 | 4 | 156354606 | 156354606 | A | G | A | R    | exonic     | NPY2R      | missense | NM_000910:p.Y22C      |
| 7313 | 4 | 158476344 | 158476344 | T | C | T | Y    | exonic     | GRIA2      | silent   | NM_001083620:p.C399C  |
| 7313 | 4 | 185915754 | 185915754 | G | A | G | R    | intronic   | ACSL1      | NA       | NA                    |
| 7313 | 4 | 189302330 | 189302330 | C | T | C | Y    | intronic   | TRIML1     | NA       | NA                    |
| 7313 | 4 | 189507791 | 189507791 | C | G | C | S    | intergenic | NA         | NA       | NA                    |
| 7313 | 5 | 918727    | 918727    | C | G | C | S    | ncRNA      | BRD9       | NA       | NA                    |
| 7313 | 5 | 1134653   | 1134653   | G | A | G | R    | intronic   | SLC12A7    | NA       | NA                    |
| 7313 | 5 | 3652403   | 3652403   | C | G | C | S    | exonic     | IRX1       | missense | NM_024337:p.A114G     |
| 7313 | 5 | 19874647  | 19874647  | G | C | G | S    | exonic     | CDH18      | missense | NM_001167667:p.P69R   |
| 7313 | 5 | 21819255  | 21819255  | C | A | C | M    | exonic     | CDH12      | missense | NM_004061:p.Q454H     |
| 7313 | 5 | 24534448  | 24534448  | A | G | A | R    | intronic   | CDH10      | NA       | NA                    |
| 7313 | 5 | 29038278  | 29038278  | C | T | C | Y    | intergenic | NA         | NA       | NA                    |
| 7313 | 5 | 35809811  | 35809811  | G | T | G | K    | exonic     | SPEF2      | nonsense | NM_024867:p.E1337X    |
| 7313 | 5 | 35896799  | 35896799  | T | C | T | Y    | exonic     | IL7R       | silent   | NM_002185:p.C57C      |
| 7313 | 5 | 38961181  | 38961181  | T | A | T | W    | exonic     | OSMR       | silent   | NM_003999:p.G721G     |
| 7313 | 5 | 45302989  | 45302989  | C | A | C | M    | exonic     | HCN1       | missense | NM_021072:p.R581I     |
| 7313 | 5 | 50147087  | 50147087  | C | T | C | Y    | exonic     | PARP8      | missense | NM_001178056:p.A547V  |
| 7313 | 5 | 55091882  | 55091882  | C | A | C | M    | intronic   | DDX4       | NA       | NA                    |
| 7313 | 5 | 63292794  | 63292794  | G | C | G | S    | exonic     | HTR1A      | missense | NM_000524:p.P170R     |
| 7313 | 5 | 65141443  | 65141443  | G | T | G | K    | intronic   | NLN        | NA       | NA                    |
| 7313 | 5 | 87508835  | 87508835  | C | A | C | M    | intergenic | NA         | NA       | NA                    |
| 7313 | 5 | 107088818 | 107088818 | T | A | T | W    | intergenic | NA         | NA       | NA                    |
| 7313 | 5 | 107090554 | 107090554 | A | G | A | R    | intergenic | NA         | NA       | NA                    |
| 7313 | 5 | 112427765 | 112427765 | T | C | T | Y    | splicing   | MCC        | NA       | NA                    |
| 7313 | 5 | 118600890 | 118600890 | A | G | A | R    | intronic   | DMXL1      | NA       | NA                    |
| 7313 | 5 | 122040283 | 122040283 | C | A | C | M    | intergenic | NA         | NA       | NA                    |
| 7313 | 5 | 127698940 | 127698940 | C | A | C | M    | intronic   | FBN2       | NA       | NA                    |
| 7313 | 5 | 128392079 | 128392079 | T | G | T | K    | intronic   | SLC27A6    | NA       | NA                    |
| 7313 | 5 | 131979679 | 131979679 | - | T | A | */+T | exonic     | RAD50      | FS_ins   | NM_005732:p.H1041fs   |
| 7313 | 5 | 140168267 | 140168267 | C | A | C | M    | exonic     | PCDHA4     | silent   | NM_018907:p.A437A     |
| 7313 | 5 | 175950038 | 175950038 | C | G | C | S    | exonic     | CDHR2      | missense | NM_001171976:p.I1120M |
| 7313 | 5 | 176328783 | 176328783 | C | A | C | M    | exonic     | UIMC1      | silent   | NM_001199298:p.P193P  |
| 7313 | 5 | 179157906 | 179157906 | G | A | G | R    | ncRNA      | MIR1229    | NA       | NA                    |
| 7313 | 6 | 24594282  | 24594282  | C | T | C | Y    | splicing   | GPLD1      | silent   | NM_001503:p.E51E      |
| 7313 | 6 | 26215662  | 26215662  | C | A | C | M    | UTR3       | HIST1H1T   | NA       | NA                    |
| 7313 | 6 | 26610207  | 26610207  | C | G | C | S    | intronic   | BTN1A1     | NA       | NA                    |
| 7313 | 6 | 28580099  | 28580099  | G | C | G | S    | exonic     | GPX6       | missense | NM_182701:p.S205R     |
| 7313 | 6 | 41358148  | 41358148  | G | A | G | R    | exonic     | TREM1      | silent   | NM_018643:p.H123H     |

|      |   |           |           |    |   |   |       |            |          |          |                       |  |
|------|---|-----------|-----------|----|---|---|-------|------------|----------|----------|-----------------------|--|
| 7313 | 6 | 46874299  | 46874299  | C  | T | C | Y     | intronic   | MEP1A    | NA       | NA                    |  |
| 7313 | 6 | 49191456  | 49191456  | G  | T | G | K     | intergenic | NA       | NA       | NA                    |  |
| 7313 | 6 | 70120888  | 70120888  | C  | A | C | M     | exonic     | BAI3     | missense | NM_001704:p.P1168T    |  |
| 7313 | 6 | 76661626  | 76661626  | A  | T | A | W     | intronic   | MYO6     | NA       | NA                    |  |
| 7313 | 6 | 76717483  | 76717483  | G  | A | G | R     | exonic     | IMPG1    | missense | NM_001563:p.A447V     |  |
| 7313 | 6 | 81323408  | 81323408  | C  | A | C | M     | intergenic | NA       | NA       | NA                    |  |
| 7313 | 6 | 81323583  | 81323583  | C  | A | C | M     | intergenic | NA       | NA       | NA                    |  |
| 7313 | 6 | 86280535  | 86280535  | A  | G | A | R     | exonic     | SNX14    | silent   | NM_020468:p.R790R     |  |
| 7313 | 6 | 90661589  | 90661589  | A  | T | A | W     | exonic     | GJA10    | silent   | NM_032602:p.I227I     |  |
| 7313 | 6 | 99334914  | 99334914  | T  | C | T | Y     | intergenic | NA       | NA       | NA                    |  |
| 7313 | 6 | 99924304  | 99924304  | C  | A | C | M     | exonic     | COQ3     | missense | NM_017421:p.V335F     |  |
| 7313 | 6 | 106642943 | 106642943 | G  | T | G | K     | exonic     | PRDM1    | missense | NM_001198:p.G73C      |  |
| 7313 | 6 | 111286980 | 111286981 | GC | - | G | */-GC | intergenic | NA       | NA       | NA                    |  |
| 7313 | 6 | 117832287 | 117832287 | G  | A | G | R     | intronic   | ROS1     | NA       | NA                    |  |
| 7313 | 6 | 132144166 | 132144166 | C  | G | C | S     | intergenic | NA       | NA       | NA                    |  |
| 7313 | 6 | 134345445 | 134345445 | G  | T | G | K     | exonic     | TBPL1    | missense | NM_004865:p.W61L      |  |
| 7313 | 6 | 137561032 | 137561032 | A  | G | A | R     | exonic     | IFNGR1   | silent   | NM_000416:p.N433N     |  |
| 7313 | 6 | 139206064 | 139206064 | A  | C | A | M     | intronic   | ECT2L    | NA       | NA                    |  |
| 7313 | 6 | 151831438 | 151831438 | A  | T | A | W     | exonic     | C6orf211 | missense | NM_024573:p.T276S     |  |
| 7313 | 6 | 152782416 | 152782416 | A  | T | A | W     | exonic     | SYNE1    | missense | NM_182961:p.V1801E    |  |
| 7313 | 6 | 152826384 | 152826384 | C  | A | C | M     | intronic   | SYNE1    | NA       | NA                    |  |
| 7313 | 6 | 165633784 | 165633784 | T  | G | T | K     | intronic   | C6orf118 | NA       | NA                    |  |
| 7313 | 7 | 11826464  | 11826464  | G  | T | G | K     | intronic   | THSD7A   | NA       | NA                    |  |
| 7313 | 7 | 21227243  | 21227243  | C  | A | C | M     | intergenic | NA       | NA       | NA                    |  |
| 7313 | 7 | 23315572  | 23315572  | G  | T | G | K     | exonic     | C7orf30  | missense | NM_138446:p.R197L     |  |
| 7313 | 7 | 31831101  | 31831101  | G  | T | G | K     | exonic     | PDE1C    | silent   | NM_001191059:p.P437P  |  |
| 7313 | 7 | 38398016  | 38398016  | C  | A | C | M     | exonic     | AMPH     | missense | NM_139316:p.S537I     |  |
| 7313 | 7 | 38433060  | 38433060  | A  | G | A | R     | intronic   | AMPH     | NA       | NA                    |  |
| 7313 | 7 | 44123897  | 44123897  | G  | A | G | R     | intronic   | POLD2    | NA       | NA                    |  |
| 7313 | 7 | 44973999  | 44973999  | C  | T | C | Y     | intronic   | MYO1G    | NA       | NA                    |  |
| 7313 | 7 | 55680896  | 55680896  | C  | G | C | S     | intergenic | NA       | NA       | NA                    |  |
| 7313 | 7 | 56264909  | 56264909  | G  | C | G | S     | intergenic | NA       | NA       | NA                    |  |
| 7313 | 7 | 57663525  | 57663525  | A  | G | A | R     | intergenic | NA       | NA       | NA                    |  |
| 7313 | 7 | 63805342  | 63805342  | G  | T | G | K     | exonic     | ZNF107   | nonsense | NM_016220:p.E409X     |  |
| 7313 | 7 | 65608442  | 65608442  | C  | T | C | Y     | intergenic | NA       | NA       | NA                    |  |
| 7313 | 7 | 67357975  | 67357975  | C  | A | C | M     | intergenic | NA       | NA       | NA                    |  |
| 7313 | 7 | 74807935  | 74807935  | C  | T | C | Y     | ncRNA      | SPDYE8P  | NA       | NA                    |  |
| 7313 | 7 | 80128362  | 80128362  | A  | T | A | W     | exonic     | CD36     | missense | NM_000072:p.N110I     |  |
| 7313 | 7 | 83995722  | 83995722  | T  | A | T | W     | intergenic | NA       | NA       | NA                    |  |
| 7313 | 7 | 87916438  | 87916438  | G  | T | G | K     | intergenic | NA       | NA       | NA                    |  |
| 7313 | 7 | 88803465  | 88803465  | C  | G | C | S     | exonic     | ZNF804B  | missense | NM_181646:p.P1078R    |  |
| 7313 | 7 | 92823159  | 92823159  | G  | T | G | K     | exonic     | CCDC132  | missense | NM_017667:p.C869F     |  |
| 7313 | 7 | 95004926  | 95004926  | C  | G | C | S     | exonic     | ASB4     | missense | NM_016116:p.C400W     |  |
| 7313 | 7 | 99809207  | 99809207  | A  | G | A | R     | UTR5       | PILRA    | NA       | NA                    |  |
| 7313 | 7 | 104097106 | 104097106 | G  | A | G | R     | intronic   | LHFPL3   | NA       | NA                    |  |
| 7313 | 7 | 107204213 | 107204213 | C  | T | C | Y     | exonic     | SLC26A3  | missense | NM_000111:p.E533K     |  |
| 7313 | 7 | 110550783 | 110550783 | G  | T | G | K     | exonic     | LRRN3    | missense | NM_001099660:p.S240I  |  |
| 7313 | 7 | 111883293 | 111883293 | G  | T | G | K     | splicing   | IFRD1    | missense | NM_001550:p.G67V      |  |
| 7313 | 7 | 116868005 | 116868005 | T  | C | T | Y     | intergenic | NA       | NA       | NA                    |  |
| 7313 | 7 | 117080089 | 117080089 | T  | A | T | W     | intronic   | CFTR     | NA       | NA                    |  |
| 7313 | 7 | 124191326 | 124191326 | C  | A | C | M     | exonic     | GPR37    | missense | NM_005302:p.C314F     |  |
| 7313 | 7 | 125960819 | 125960819 | C  | A | C | M     | exonic     | GRM8     | missense | NM_001127323:p.G618V  |  |
| 7313 | 7 | 126197115 | 126197115 | C  | T | C | Y     | ncRNA      | GRM8     | NA       | NA                    |  |
| 7313 | 7 | 126197116 | 126197116 | G  | C | G | S     | ncRNA      | GRM8     | NA       | NA                    |  |
| 7313 | 7 | 136822907 | 136822907 | G  | T | G | K     | exonic     | DGKI     | missense | NM_004717:p.R791S     |  |
| 7313 | 7 | 137451937 | 137451937 | G  | T | G | K     | exonic     | AKR1D1   | missense | NM_001190906:p.D283Y  |  |
| 7313 | 7 | 137776651 | 137776651 | C  | A | C | M     | intergenic | NA       | NA       | NA                    |  |
| 7313 | 7 | 139694936 | 139694936 | G  | A | G | R     | exonic     | SLC37A3  | missense | NM_032295:p.A328V     |  |
| 7313 | 7 | 142170787 | 142170787 | C  | A | C | M     | intergenic | NA       | NA       | NA                    |  |
| 7313 | 7 | 142170796 | 142170796 | T  | C | T | Y     | intergenic | NA       | NA       | NA                    |  |
| 7313 | 7 | 143402797 | 143402797 | C  | G | C | S     | exonic     | OR2A25   | silent   | NM_001004488:p.L184L  |  |
| 7313 | 7 | 151658629 | 151658629 | C  | - | G | */-C  | exonic     | MLL3     | FS_del   | NM_170606:p.A127fs    |  |
| 7313 | 7 | 158519963 | 158519963 | A  | T | A | W     | intronic   | VIPR2    | NA       | NA                    |  |
| 7313 | 8 | 8271840   | 8271840   | C  | - | A | */-C  | exonic     | SGK223   | FS_del   | NM_001080826:p.V497fs |  |
| 7313 | 8 | 15525055  | 15525055  | G  | A | G | R     | exonic     | TUSC3    | silent   | NM_178234:p.K78K      |  |
| 7313 | 8 | 16022442  | 16022442  | C  | A | C | M     | exonic     | MSR1     | nonsense | NM_138715:p.E360X     |  |
| 7313 | 8 | 27665969  | 27665969  | C  | T | C | Y     | exonic     | CCDC25   | missense | NM_018246:p.V75M      |  |
| 7313 | 8 | 43245697  | 43245697  | T  | C | T | Y     | intergenic | NA       | NA       | NA                    |  |
| 7313 | 8 | 51469289  | 51469289  | T  | A | T | W     | intronic   | SNTG1    | NA       | NA                    |  |
| 7313 | 8 | 59188415  | 59188415  | G  | T | G | K     | intronic   | FAM110B  | NA       | NA                    |  |
| 7313 | 8 | 68299875  | 68299875  | C  | T | C | Y     | intronic   | ARFGEF1  | NA       | NA                    |  |
| 7313 | 8 | 68340991  | 68340991  | C  | A | C | M     | exonic     | ARFGEF1  | nonsense | NM_006421:p.E643X     |  |
| 7313 | 8 | 69174558  | 69174558  | C  | G | C | S     | exonic     | PREX2    | missense | NM_024870:p.L881V     |  |
| 7313 | 8 | 69596796  | 69596796  | A  | T | A | W     | intronic   | C8orf34  | NA       | NA                    |  |
| 7313 | 8 | 71658116  | 71658116  | A  | G | A | R     | intronic   | TRAM1    | NA       | NA                    |  |
| 7313 | 8 | 88870960  | 88870960  | A  | T | A | W     | intergenic | NA       | NA       | NA                    |  |
| 7313 | 8 | 93068375  | 93068375  | C  | A | C | M     | splicing   | RUNX1T1  | silent   | NM_001198679:p.G390G  |  |
| 7313 | 8 | 101345770 | 101345770 | C  | G | C | S     | intronic   | RNF19A   | NA       | NA                    |  |
| 7313 | 8 | 107792224 | 107792224 | A  | G | A | R     | intronic   | OXR1     | NA       | NA                    |  |

|      |    |           |           |   |   |   |      |            |            |          |                       |
|------|----|-----------|-----------|---|---|---|------|------------|------------|----------|-----------------------|
| 7313 | 8  | 127154495 | 127154495 | C | A | C | M    | intergenic | NA         | NA       | NA                    |
| 7313 | 8  | 141811847 | 141811847 | G | A | G | R    | intronic   | PTK2       | NA       | NA                    |
| 7313 | 9  | 14194294  | 14194294  | T | C | T | Y    | intronic   | NFIB       | NA       | NA                    |
| 7313 | 9  | 17437212  | 17437212  | A | T | A | W    | intronic   | CNTLN      | NA       | NA                    |
| 7313 | 9  | 38517586  | 38517586  | C | T | C | Y    | intergenic | NA         | NA       | NA                    |
| 7313 | 9  | 67906808  | 67906808  | C | T | C | Y    | intergenic | NA         | NA       | NA                    |
| 7313 | 9  | 72632435  | 72632435  | C | G | C | S    | intronic   | TRPM3      | NA       | NA                    |
| 7313 | 9  | 73550195  | 73550195  | G | C | G | S    | exonic     | TMEM2      | missense | NM_001135820:p.S198C  |
| 7313 | 9  | 73812708  | 73812708  | G | T | G | K    | intergenic | NA         | NA       | NA                    |
| 7313 | 9  | 89546252  | 89546252  | A | T | A | W    | intergenic | NA         | NA       | NA                    |
| 7313 | 9  | 90231196  | 90231196  | C | G | C | S    | UTR5       | SPIN1      | NA       | NA                    |
| 7313 | 9  | 94217469  | 94217469  | A | T | A | W    | exonic     | OMD        | missense | NM_005014:p.F351Y     |
| 7313 | 9  | 113449301 | 113449301 | C | T | C | Y    | exonic     | DNAJC25    | missense | NM_001015882:p.P144S  |
| 7313 | 9  | 116650608 | 116650608 | G | T | G | K    | intergenic | NA         | NA       | NA                    |
| 7313 | 9  | 122959711 | 122959711 | C | T | C | Y    | intronic   | CEP110     | NA       | NA                    |
| 7313 | 9  | 129516488 | 129516488 | G | A | G | R    | exonic     | PTRH1      | silent   | NM_001002913:p.L151L  |
| 7313 | 9  | 130816934 | 130816934 | C | A | C | M    | exonic     | SH3GLB2    | silent   | NM_020145:p.T135T     |
| 7313 | 10 | 393838    | 393838    | G | A | G | R    | exonic     | DIP2C      | missense | NM_014974:p.S945F     |
| 7313 | 10 | 13239289  | 13239289  | A | T | A | W    | intergenic | NA         | NA       | NA                    |
| 7313 | 10 | 14612398  | 14612398  | G | C | G | S    | exonic     | FAM107B    | missense | NM_031453:p.P198A     |
| 7313 | 10 | 17905185  | 17905185  | G | A | G | R    | exonic     | MRC1       | silent   | NM_002438:p.Q56Q      |
| 7313 | 10 | 26552794  | 26552794  | C | A | C | M    | intronic   | GAD2       | NA       | NA                    |
| 7313 | 10 | 26552795  | 26552795  | C | A | C | M    | intronic   | GAD2       | NA       | NA                    |
| 7313 | 10 | 27742416  | 27742416  | C | T | C | Y    | exonic     | PTCHD3     | missense | NM_001034842:p.R257K  |
| 7313 | 10 | 31849844  | 31849844  | G | A | G | R    | exonic     | ZEB1       | silent   | NM_001128128:p.G509G  |
| 7313 | 10 | 38409512  | 38409512  | C | A | C | M    | intergenic | NA         | NA       | NA                    |
| 7313 | 10 | 38505032  | 38505032  | G | T | G | K    | ncRNA      | LOC1001290 | NA       | NA                    |
| 7313 | 10 | 39022081  | 39022081  | T | C | T | Y    | intergenic | NA         | NA       | NA                    |
| 7313 | 10 | 39022225  | 39022225  | A | T | A | W    | intergenic | NA         | NA       | NA                    |
| 7313 | 10 | 42526705  | 42526705  | G | T | G | K    | intergenic | NA         | NA       | NA                    |
| 7313 | 10 | 42612299  | 42612299  | A | G | A | R    | exonic     | BMS1       | missense | NM_014753:p.E534G     |
| 7313 | 10 | 42974158  | 42974158  | C | G | C | S    | intronic   | CSGALNACT2 | NA       | NA                    |
| 7313 | 10 | 49298425  | 49298425  | A | T | A | W    | intronic   | MAPK8      | NA       | NA                    |
| 7313 | 10 | 52273795  | 52273795  | G | T | G | K    | exonic     | A1CF       | silent   | NM_001198820:p.R73R   |
| 7313 | 10 | 60713113  | 60713113  | C | A | C | M    | intronic   | FAM13C     | NA       | NA                    |
| 7313 | 10 | 65474878  | 65474878  | C | T | C | Y    | intergenic | NA         | NA       | NA                    |
| 7313 | 10 | 86310180  | 86310180  | T | C | T | Y    | intergenic | NA         | NA       | NA                    |
| 7313 | 10 | 88604425  | 88604425  | C | T | C | Y    | intronic   | BMPR1A     | NA       | NA                    |
| 7313 | 10 | 98406684  | 98406684  | A | G | A | R    | intronic   | PIK3AP1    | NA       | NA                    |
| 7313 | 10 | 100179369 | 100179369 | G | A | G | R    | exonic     | HPS1       | silent   | NM_182639:p.L296L     |
| 7313 | 10 | 102728399 | 102728399 | G | A | G | R    | UTR3       | MRPL43     | NA       | NA                    |
| 7313 | 10 | 102728963 | 102728963 | G | A | G | R    | exonic     | SEMA4G     | missense | NM_017893:p.A310T     |
| 7313 | 10 | 108327262 | 108327262 | G | C | G | S    | exonic     | SORCS1     | missense | NM_052918:p.P1138R    |
| 7313 | 10 | 108329143 | 108329143 | T | A | T | W    | exonic     | SORCS1     | silent   | NM_001013031:p.A1115A |
| 7313 | 10 | 115794267 | 115794267 | T | C | T | Y    | exonic     | ADRB1      | missense | NM_000684:p.F129S     |
| 7313 | 10 | 118305016 | 118305016 | C | G | C | S    | intronic   | PNLIP      | NA       | NA                    |
| 7313 | 11 | 393681    | 393681    | - | G | C | */+G | exonic     | PKP3       | FS_ins   | NM_007183:p.R663fs    |
| 7313 | 11 | 1263862   | 1263862   | C | T | C | Y    | exonic     | TOLLIP     | missense | NM_019009:p.V186M     |
| 7313 | 11 | 4189653   | 4189653   | T | A | T | W    | intergenic | NA         | NA       | NA                    |
| 7313 | 11 | 4826819   | 4826819   | G | A | G | R    | exonic     | OR51S1     | missense | NM_001004758:p.P66S   |
| 7313 | 11 | 6106547   | 6106547   | C | A | C | M    | intergenic | NA         | NA       | NA                    |
| 7313 | 11 | 6772876   | 6772876   | C | A | C | M    | exonic     | OR6A2      | missense | NM_003696:p.G214W     |
| 7313 | 11 | 17413970  | 17413970  | A | T | A | W    | intronic   | ABCC8      | NA       | NA                    |
| 7313 | 11 | 18209665  | 18209665  | G | A | G | R    | exonic     | SAA2-SAA4  | missense | NM_001199744:p.P196L  |
| 7313 | 11 | 22291403  | 22291403  | G | T | G | K    | intergenic | NA         | NA       | NA                    |
| 7313 | 11 | 26405175  | 26405175  | T | C | T | Y    | intronic   | ANO3       | NA       | NA                    |
| 7313 | 11 | 27335610  | 27335610  | T | C | T | Y    | exonic     | CCDC34     | silent   | NM_080654:p.P138P     |
| 7313 | 11 | 40094077  | 40094077  | G | C | G | S    | exonic     | LRRC4C     | silent   | NM_020929:p.T114T     |
| 7313 | 11 | 40094292  | 40094292  | G | C | G | S    | exonic     | LRRC4C     | missense | NM_020929:p.R43G      |
| 7313 | 11 | 46523715  | 46523715  | G | C | G | S    | intronic   | AMBRA1     | NA       | NA                    |
| 7313 | 11 | 47267660  | 47267660  | A | T | A | W    | intronic   | MADD       | NA       | NA                    |
| 7313 | 11 | 48969928  | 48969928  | C | G | C | S    | intergenic | NA         | NA       | NA                    |
| 7313 | 11 | 49876904  | 49876904  | C | A | C | M    | intergenic | NA         | NA       | NA                    |
| 7313 | 11 | 54956399  | 54956399  | T | C | T | Y    | intergenic | NA         | NA       | NA                    |
| 7313 | 11 | 55539848  | 55539848  | C | A | C | M    | intergenic | NA         | NA       | NA                    |
| 7313 | 11 | 55647079  | 55647079  | G | A | G | R    | exonic     | OR8H3      | missense | NM_001005201:p.V219M  |
| 7313 | 11 | 55882131  | 55882131  | C | G | C | S    | intergenic | NA         | NA       | NA                    |
| 7313 | 11 | 55884445  | 55884445  | C | A | C | M    | exonic     | OR8J1      | silent   | NM_001005205:p.T49T   |
| 7313 | 11 | 55986861  | 55986861  | A | G | A | R    | exonic     | OR5M9      | missense | NM_001004743:p.I198T  |
| 7313 | 11 | 57816754  | 57816754  | C | T | C | Y    | intergenic | NA         | NA       | NA                    |
| 7313 | 11 | 58233865  | 58233865  | G | T | G | K    | exonic     | GLYAT      | missense | NM_201648:p.H281N     |
| 7313 | 11 | 58946080  | 58946080  | C | T | C | Y    | exonic     | OR5A2      | missense | NM_001001954:p.R308K  |
| 7313 | 11 | 60826601  | 60826601  | G | A | G | R    | intronic   | DDB1       | NA       | NA                    |
| 7313 | 11 | 64270865  | 64270865  | C | A | C | M    | intronic   | PYGM       | NA       | NA                    |
| 7313 | 11 | 64271155  | 64271155  | C | T | C | Y    | intronic   | PYGM       | NA       | NA                    |
| 7313 | 11 | 64452496  | 64452496  | G | C | G | S    | intronic   | PPP2R5B    | NA       | NA                    |
| 7313 | 11 | 64581430  | 64581430  | G | A | G | R    | exonic     | NAALADL1   | missense | NM_005468:p.R198C     |
| 7313 | 11 | 65407278  | 65407278  | T | A | T | W    | exonic     | CTSW       | missense | NM_001335:p.V276E     |
| 7313 | 11 | 67007182  | 67007182  | G | T | G | K    | UTR5       | AIP        | NA       | NA                    |

|      |    |           |           |   |      |   |         |            |            |          |                      |  |
|------|----|-----------|-----------|---|------|---|---------|------------|------------|----------|----------------------|--|
| 7313 | 11 | 68124317  | 68124317  | G | T    | G | K       | intronic   | PPP6R3     | NA       | NA                   |  |
| 7313 | 11 | 68703123  | 68703123  | - | GAAA | G | */+GAAA | intergenic | NA         | NA       | NA                   |  |
| 7313 | 11 | 75580364  | 75580364  | T | C    | T | Y       | exonic     | WNT11      | missense | NM_004626:p.K261R    |  |
| 7313 | 11 | 89588070  | 89588070  | C | A    | C | M       | intronic   | CHORDC1    | NA       | NA                   |  |
| 7313 | 11 | 103413013 | 103413013 | C | A    | C | M       | exonic     | DDI1       | missense | NM_001001711:p.P85T  |  |
| 7313 | 11 | 107114148 | 107114148 | G | C    | G | S       | intergenic | NA         | NA       | NA                   |  |
| 7313 | 11 | 113307556 | 113307556 | G | T    | G | K       | intronic   | HTR3B      | NA       | NA                   |  |
| 7313 | 11 | 122353797 | 122353797 | A | G    | A | R       | exonic     | BSX        | missense | NM_001098169:p.F158L |  |
| 7313 | 11 | 122353818 | 122353818 | G | A    | G | R       | intronic   | BSX        | NA       | NA                   |  |
| 7313 | 11 | 123319221 | 123319221 | G | T    | G | K       | exonic     | OR6T1      | missense | NM_001005187:p.R179S |  |
| 7313 | 11 | 123856948 | 123856948 | G | A    | G | R       | intergenic | NA         | NA       | NA                   |  |
| 7313 | 11 | 129307205 | 129307205 | A | T    | A | W       | splicing   | PRDM10     | NA       | NA                   |  |
| 7313 | 12 | 841543    | 841543    | C | T    | C | Y       | exonic     | WNK1       | missense | NM_018979:p.S662F    |  |
| 7313 | 12 | 864919    | 864919    | A | T    | A | W       | exonic     | WNK1       | missense | NM_018979:p.Q1563L   |  |
| 7313 | 12 | 6089903   | 6089903   | C | T    | C | Y       | exonic     | VWF        | missense | NM_000552:p.G144S    |  |
| 7313 | 12 | 8704648   | 8704648   | G | A    | G | R       | intronic   | MFAP5      | NA       | NA                   |  |
| 7313 | 12 | 12612476  | 12612476  | G | A    | G | R       | intergenic | NA         | NA       | NA                   |  |
| 7313 | 12 | 13608055  | 13608055  | C | G    | C | S       | exonic     | GRIN2B     | silent   | NM_000834:p.G1128G   |  |
| 7313 | 12 | 19133660  | 19133660  | C | G    | C | S       | intergenic | NA         | NA       | NA                   |  |
| 7313 | 12 | 19985561  | 19985561  | G | T    | G | K       | intergenic | NA         | NA       | NA                   |  |
| 7313 | 12 | 20677893  | 20677893  | G | T    | G | K       | splicing   | PDE3A      | NA       | NA                   |  |
| 7313 | 12 | 21903856  | 21903856  | C | T    | C | Y       | exonic     | ABCC9      | silent   | NM_020298:p.L776L    |  |
| 7313 | 12 | 22688398  | 22688398  | C | G    | C | S       | intronic   | ETNK1      | NA       | NA                   |  |
| 7313 | 12 | 24962248  | 24962248  | C | T    | C | Y       | intronic   | BCAT1      | NA       | NA                   |  |
| 7313 | 12 | 36883550  | 36883550  | C | -    | T | */-C    | intergenic | NA         | NA       | NA                   |  |
| 7313 | 12 | 37984960  | 37984960  | C | A    | C | M       | exonic     | KIF21A     | missense | NM_017641:p.C1484F   |  |
| 7313 | 12 | 43743770  | 43743770  | T | A    | T | W       | ncRNA      | RACGAP1P   | NA       | NA                   |  |
| 7313 | 12 | 46421594  | 46421594  | C | T    | C | Y       | exonic     | RAPGEF3    | silent   | NM_001098532:p.E586E |  |
| 7313 | 12 | 47206182  | 47206182  | C | A    | C | M       | exonic     | OR8S1      | silent   | NM_001005203:p.V167V |  |
| 7313 | 12 | 54149865  | 54149865  | C | A    | C | M       | exonic     | OR6C70     | nonsense | NM_001005499:p.E109X |  |
| 7313 | 12 | 56293707  | 56293707  | A | G    | A | R       | intronic   | ARHGEF25   | NA       | NA                   |  |
| 7313 | 12 | 61240537  | 61240537  | G | T    | G | K       | splicing   | MON2       | NA       | NA                   |  |
| 7313 | 12 | 65002760  | 65002760  | G | T    | G | K       | intronic   | HELB       | NA       | NA                   |  |
| 7313 | 12 | 66932785  | 66932785  | C | G    | C | S       | intronic   | IL22       | NA       | NA                   |  |
| 7313 | 12 | 72850894  | 72850894  | G | A    | G | R       | intergenic | NA         | NA       | NA                   |  |
| 7313 | 12 | 74023956  | 74023956  | T | A    | T | W       | exonic     | GLIPR1L1   | missense | NM_152779:p.C131S    |  |
| 7313 | 12 | 80916532  | 80916532  | C | A    | C | M       | intergenic | NA         | NA       | NA                   |  |
| 7313 | 12 | 94939080  | 94939080  | T | C    | T | Y       | intronic   | LTA4H      | NA       | NA                   |  |
| 7313 | 12 | 101066393 | 101066393 | C | G    | C | S       | intronic   | C12orf48   | NA       | NA                   |  |
| 7313 | 12 | 128750382 | 128750382 | G | A    | G | R       | exonic     | TMEM132D   | silent   | NM_133448:p.T298T    |  |
| 7313 | 12 | 129396255 | 129396255 | C | A    | C | M       | exonic     | PIWIL1     | silent   | NM_001190971:p.L65L  |  |
| 7313 | 12 | 129842349 | 129842349 | G | T    | G | K       | UTR3       | STX2       | NA       | NA                   |  |
| 7313 | 13 | 25708176  | 25708176  | - | T    | G | */+T    | intergenic | NA         | NA       | NA                   |  |
| 7313 | 13 | 30014016  | 30014016  | T | G    | T | K       | intergenic | NA         | NA       | NA                   |  |
| 7313 | 13 | 37051518  | 37051518  | T | A    | T | W       | intronic   | POSTN      | NA       | NA                   |  |
| 7313 | 13 | 37218230  | 37218230  | C | T    | C | Y       | exonic     | TRPC4      | silent   | NM_001135955:p.Q247Q |  |
| 7313 | 13 | 51446909  | 51446909  | C | G    | C | S       | exonic     | ATP7B      | missense | NM_000053:p.E150Q    |  |
| 7313 | 13 | 66103383  | 66103383  | G | T    | G | K       | exonic     | PCDH9      | missense | NM_203487:p.D1100E   |  |
| 7313 | 13 | 93478057  | 93478057  | C | A    | C | M       | exonic     | GPC6       | missense | NM_005708:p.T262N    |  |
| 7313 | 14 | 18538668  | 18538668  | G | T    | G | K       | intergenic | NA         | NA       | NA                   |  |
| 7313 | 14 | 18888040  | 18888040  | A | G    | A | R       | intergenic | NA         | NA       | NA                   |  |
| 7313 | 14 | 19458885  | 19458885  | T | A    | T | W       | exonic     | OR4K5      | missense | NM_001005483:p.F94I  |  |
| 7313 | 14 | 19762389  | 19762389  | G | T    | G | K       | exonic     | OR11H6     | silent   | NM_001004480:p.G227G |  |
| 7313 | 14 | 20014633  | 20014633  | A | G    | A | R       | UTR3       | PNP        | NA       | NA                   |  |
| 7313 | 14 | 20094643  | 20094643  | A | T    | A | W       | exonic     | RNASE9     | nonsense | NM_001110358:p.C147X |  |
| 7313 | 14 | 23642247  | 23642247  | G | T    | G | K       | exonic     | PCK2       | missense | NM_004563:p.G471W    |  |
| 7313 | 14 | 23747218  | 23747218  | G | C    | G | S       | UTR3       | TSSK4      | NA       | NA                   |  |
| 7313 | 14 | 29138592  | 29138592  | C | A    | C | M       | intronic   | PRKD1      | NA       | NA                   |  |
| 7313 | 14 | 33332994  | 33332994  | C | A    | C | M       | exonic     | NPAS3      | missense | NM_173159:p.L419I    |  |
| 7313 | 14 | 38631577  | 38631577  | T | A    | T | W       | exonic     | SEC23A     | silent   | NM_006364:p.P95P     |  |
| 7313 | 14 | 49155225  | 49155225  | C | T    | C | Y       | UTR3       | RPL36AL    | NA       | NA                   |  |
| 7313 | 14 | 61401771  | 61401771  | G | A    | G | R       | intergenic | NA         | NA       | NA                   |  |
| 7313 | 14 | 63263761  | 63263761  | T | C    | T | Y       | exonic     | SGPP1      | missense | NM_030791:p.M219V    |  |
| 7313 | 14 | 67326121  | 67326121  | C | G    | C | S       | intronic   | ZFYVE26    | NA       | NA                   |  |
| 7313 | 14 | 69783942  | 69783942  | A | C    | A | M       | ncRNA      | ADAM21P1   | NA       | NA                   |  |
| 7313 | 14 | 74425521  | 74425521  | A | T    | A | W       | ncRNA      | DLST       | NA       | NA                   |  |
| 7313 | 14 | 74643145  | 74643145  | G | A    | G | R       | exonic     | NEK9       | silent   | NM_033116:p.L447L    |  |
| 7313 | 14 | 91970046  | 91970046  | G | T    | G | K       | exonic     | SLC24A4    | missense | NM_153647:p.K93N     |  |
| 7313 | 14 | 91990226  | 91990226  | G | C    | G | S       | intronic   | SLC24A4    | NA       | NA                   |  |
| 7313 | 14 | 92751070  | 92751070  | T | G    | T | K       | exonic     | UBR7       | missense | NM_175748:p.F162V    |  |
| 7313 | 14 | 94124126  | 94124126  | C | T    | C | Y       | intronic   | SERPINA5   | NA       | NA                   |  |
| 7313 | 14 | 100434044 | 100434044 | G | C    | G | S       | ncRNA      | MEG8       | NA       | NA                   |  |
| 7313 | 14 | 101516242 | 101516242 | A | G    | A | R       | intronic   | DYNC1H1    | NA       | NA                   |  |
| 7313 | 14 | 102875125 | 102875125 | C | T    | C | Y       | intronic   | EIF5       | NA       | NA                   |  |
| 7313 | 14 | 104684768 | 104684768 | C | G    | C | S       | exonic     | JAG2       | missense | NM_002226:p.G807R    |  |
| 7313 | 15 | 18343816  | 18343816  | C | T    | C | Y       | intergenic | NA         | NA       | NA                   |  |
| 7313 | 15 | 21362782  | 21362782  | C | G    | C | S       | exonic     | MKRN3      | missense | NM_005664:p.R254G    |  |
| 7313 | 15 | 22881743  | 22881743  | G | A    | G | R       | downstream | SNORD116-1 | NA       | NA                   |  |
| 7313 | 15 | 24379645  | 24379645  | C | A    | C | M       | exonic     | GABRB3     | silent   | NM_000814:p.T157T    |  |

|      |    |          |          |   |   |   |      |            |            |          |                       |
|------|----|----------|----------|---|---|---|------|------------|------------|----------|-----------------------|
| 7313 | 15 | 26165649 | 26165649 | G | A | G | R    | intronic   | HERC2      | NA       | NA                    |
| 7313 | 15 | 32142850 | 32142850 | T | A | T | W    | exonic     | CHRM5      | missense | NM_012125:p.C214S     |
| 7313 | 15 | 32232467 | 32232467 | C | G | C | S    | exonic     | C15orf29   | missense | NM_024713:p.R85T      |
| 7313 | 15 | 41104959 | 41104959 | C | A | C | M    | intronic   | UBR1       | NA       | NA                    |
| 7313 | 15 | 41815714 | 41815714 | C | A | C | M    | ncRNA      | CATSPER2P1 | NA       | NA                    |
| 7313 | 15 | 41854003 | 41854003 | C | G | C | S    | exonic     | ELL3       | missense | NM_025165:p.E277Q     |
| 7313 | 15 | 43008211 | 43008211 | C | A | C | M    | intergenic | NA         | NA       | NA                    |
| 7313 | 15 | 46200661 | 46200661 | G | C | G | S    | intronic   | SLC24A5    | NA       | NA                    |
| 7313 | 15 | 49648097 | 49648097 | G | C | G | S    | intronic   | DMXL2      | NA       | NA                    |
| 7313 | 15 | 59934179 | 59934179 | C | T | C | Y    | intronic   | VPS13C     | NA       | NA                    |
| 7313 | 15 | 60780660 | 60780660 | G | T | G | K    | exonic     | TLN2       | missense | NM_015059:p.D551Y     |
| 7313 | 15 | 60806656 | 60806656 | G | T | G | K    | exonic     | TLN2       | missense | NM_015059:p.A1112S    |
| 7313 | 15 | 72361203 | 72361203 | C | - | G | */-C | exonic     | CCDC33     | FS_del   | NM_025055:p.A352fs    |
| 7313 | 15 | 72415486 | 72415486 | C | A | C | M    | UTR3       | CCDC33     | NA       | NA                    |
| 7313 | 15 | 76462078 | 76462078 | G | T | G | K    | intergenic | NA         | NA       | NA                    |
| 7313 | 15 | 82485086 | 82485086 | G | T | G | K    | exonic     | ADAMTSL3   | missense | NM_207517:p.G1517V    |
| 7313 | 15 | 86277448 | 86277448 | A | G | A | R    | intronic   | NTRK3      | NA       | NA                    |
| 7313 | 15 | 90808395 | 90808395 | C | T | C | Y    | exonic     | ST8SIA2    | silent   | NM_006011:p.L302L     |
| 7313 | 16 | 2452033  | 2452033  | A | G | A | R    | intronic   | C16orf59   | NA       | NA                    |
| 7313 | 16 | 3741731  | 3741731  | T | C | T | Y    | exonic     | CREBBP     | missense | NM_004380:p.Q1259R    |
| 7313 | 16 | 5065388  | 5065388  | A | T | A | W    | splicing   | ALG1       | NA       | NA                    |
| 7313 | 16 | 9765157  | 9765157  | G | T | C | Y    | exonic     | GRIN2A     | missense | NM_001134407:p.D1249N |
| 7313 | 16 | 10181595 | 10181595 | C | C | G | S    | exonic     | GRIN2A     | missense | NM_001134407:p.Q59E   |
| 7313 | 16 | 14877897 | 14877897 | C | G | C | S    | intronic   | NOMO1      | NA       | NA                    |
| 7313 | 16 | 15725984 | 15725984 | G | A | G | R    | UTR3       | NDE1       | NA       | NA                    |
| 7313 | 16 | 20269576 | 20269576 | C | A | C | M    | UTR5       | UMOD       | NA       | NA                    |
| 7313 | 16 | 23361281 | 23361281 | G | A | G | R    | intronic   | COG7       | NA       | NA                    |
| 7313 | 16 | 23907383 | 23907383 | C | T | C | Y    | exonic     | PRKCB      | missense | NM_002738:p.P87S      |
| 7313 | 16 | 34337893 | 34337893 | G | T | G | K    | intergenic | NA         | NA       | NA                    |
| 7313 | 16 | 49731266 | 49731266 | C | A | C | M    | exonic     | SALL1      | nonsense | NM_002968:p.G790X     |
| 7313 | 16 | 58616190 | 58616190 | G | C | G | S    | intergenic | NA         | NA       | NA                    |
| 7313 | 16 | 69401180 | 69401180 | C | A | C | M    | intronic   | HYDIN      | NA       | NA                    |
| 7313 | 16 | 70129135 | 70129135 | G | A | G | R    | exonic     | CHST4      | missense | NM_005769:p.D352N     |
| 7313 | 16 | 73222169 | 73222169 | T | A | T | W    | intronic   | RFWD3      | NA       | NA                    |
| 7313 | 16 | 74070180 | 74070180 | C | G | C | S    | exonic     | CHST6      | missense | NM_021615:p.A350P     |
| 7313 | 17 | 3469936  | 3469936  | C | - | T | */-C | intronic   | SHPK       | NA       | NA                    |
| 7313 | 17 | 4672957  | 4672957  | A | T | A | W    | exonic     | PLD2       | missense | NM_002663:p.Y878F     |
| 7313 | 17 | 7280010  | 7280010  | G | T | G | K    | exonic     | TMEM102    | silent   | NM_178518:p.A32A      |
| 7313 | 17 | 7518276  | 7518276  | C | G | C | S    | exonic     | TP53       | missense | NM_001126117:p.G112R  |
| 7313 | 17 | 9677873  | 9677873  | A | G | A | R    | exonic     | GLP2R      | missense | NM_004246:p.T72A      |
| 7313 | 17 | 10248473 | 10248473 | T | C | T | Y    | exonic     | MYH8       | missense | NM_002472:p.K863E     |
| 7313 | 17 | 15905937 | 15905937 | T | C | T | Y    | intronic   | NCOR1      | NA       | NA                    |
| 7313 | 17 | 20522423 | 20522423 | C | A | C | M    | intergenic | NA         | NA       | NA                    |
| 7313 | 17 | 23692655 | 23692655 | A | G | A | R    | intronic   | TNFAIP1    | NA       | NA                    |
| 7313 | 17 | 24605472 | 24605472 | G | A | G | R    | exonic     | CRYBA1     | silent   | NM_005208:p.S209S     |
| 7313 | 17 | 25794984 | 25794984 | A | C | A | M    | exonic     | CPD        | silent   | NM_001304:p.T804T     |
| 7313 | 17 | 27392380 | 27392380 | C | A | C | M    | ncRNA      | SH3GL1P1   | NA       | NA                    |
| 7313 | 17 | 27398942 | 27398942 | A | G | A | R    | exonic     | LRRC37B    | silent   | NM_052888:p.L764L     |
| 7313 | 17 | 44389068 | 44389068 | C | T | C | Y    | intergenic | NA         | NA       | NA                    |
| 7313 | 17 | 49255563 | 49255563 | C | A | C | M    | exonic     | KIF2B      | missense | NM_032559:p.T57K      |
| 7313 | 17 | 49257438 | 49257438 | C | G | C | S    | UTR3       | KIF2B      | NA       | NA                    |
| 7313 | 17 | 53713018 | 53713018 | G | T | G | K    | exonic     | MPO        | missense | NM_000250:p.A34E      |
| 7313 | 17 | 54331659 | 54331659 | G | T | G | K    | intronic   | PPM1E      | NA       | NA                    |
| 7313 | 17 | 57022885 | 57022885 | C | A | C | M    | exonic     | NACA2      | missense | NM_199290:p.G147C     |
| 7313 | 17 | 64630931 | 64630931 | C | T | C | Y    | intronic   | ABCA6      | NA       | NA                    |
| 7313 | 17 | 75370615 | 75370615 | G | C | G | S    | UTR3       | CBX2       | NA       | NA                    |
| 7313 | 17 | 75974616 | 75974616 | C | G | C | S    | ncRNA      | LOC1002943 | NA       | NA                    |
| 7313 | 17 | 76584105 | 76584105 | G | T | G | K    | exonic     | CHMP6      | silent   | NM_024591:p.V100V     |
| 7313 | 17 | 77420125 | 77420125 | G | C | G | S    | exonic     | ARHGDI1A   | missense | NM_004309:p.I177M     |
| 7313 | 18 | 4681687  | 4681687  | C | A | C | M    | intergenic | NA         | NA       | NA                    |
| 7313 | 18 | 5413430  | 5413430  | T | A | T | W    | exonic     | EPB41L3    | missense | NM_012307:p.Y429F     |
| 7313 | 18 | 8396047  | 8396047  | C | T | C | Y    | intronic   | PTPRM      | NA       | NA                    |
| 7313 | 18 | 12057535 | 12057535 | C | A | C | M    | intergenic | NA         | NA       | NA                    |
| 7313 | 18 | 16768976 | 16768976 | A | G | A | R    | intergenic | NA         | NA       | NA                    |
| 7313 | 18 | 17698630 | 17698630 | G | C | G | S    | UTR3       | MIB1       | NA       | NA                    |
| 7313 | 18 | 18253096 | 18253096 | G | C | G | S    | intergenic | NA         | NA       | NA                    |
| 7313 | 18 | 26828110 | 26828110 | G | A | G | R    | UTR3       | DSC3       | NA       | NA                    |
| 7313 | 18 | 26828116 | 26828116 | G | T | G | K    | UTR3       | DSC3       | NA       | NA                    |
| 7313 | 18 | 26828358 | 26828358 | G | C | G | S    | intronic   | DSC3       | NA       | NA                    |
| 7313 | 18 | 27189054 | 27189054 | G | T | G | K    | exonic     | DSG1       | missense | NM_001942:p.G966V     |
| 7313 | 18 | 49102480 | 49102480 | C | A | C | M    | exonic     | DCC        | missense | NM_005215:p.P707T     |
| 7313 | 18 | 57321157 | 57321157 | A | G | A | R    | intronic   | CDH20      | NA       | NA                    |
| 7313 | 18 | 62323185 | 62323185 | G | T | G | K    | exonic     | CDH19      | nonsense | NM_021153:p.Y721X     |
| 7313 | 19 | 570252   | 570252   | G | C | G | S    | exonic     | POLRMT     | missense | NM_005035:p.F1037L    |
| 7313 | 19 | 1009605  | 1009605  | C | A | C | M    | intronic   | ABCA7      | NA       | NA                    |
| 7313 | 19 | 2159933  | 2159933  | G | C | G | S    | splicing   | DOT1L      | NA       | NA                    |
| 7313 | 19 | 6258043  | 6258043  | C | A | C | M    | intronic   | ACER1      | NA       | NA                    |
| 7313 | 19 | 7499572  | 7499572  | G | T | G | K    | exonic     | MCOLN1     | missense | NM_020533:p.G323C     |
| 7313 | 19 | 7824111  | 7824111  | G | A | G | R    | intronic   | EVISL      | NA       | NA                    |

|      |    |          |          |   |   |   |   |            |            |          |                      |
|------|----|----------|----------|---|---|---|---|------------|------------|----------|----------------------|
| 7313 | 19 | 9132546  | 9132546  | A | T | A | W | exonic     | ZNF317     | missense | NM_020933:p.M409L    |
| 7313 | 19 | 9223118  | 9223118  | G | C | G | S | exonic     | OR7E24     | silent   | NM_001079935:p.L133L |
| 7313 | 19 | 15862263 | 15862263 | G | A | G | R | intronic   | CYP4F2     | NA       | NA                   |
| 7313 | 19 | 15864295 | 15864295 | C | A | C | M | intronic   | CYP4F2     | NA       | NA                   |
| 7313 | 19 | 17489162 | 17489162 | C | T | C | Y | exonic     | PGL5       | silent   | NM_012088:p.H154H    |
| 7313 | 19 | 20139202 | 20139202 | G | T | G | K | intronic   | ZNF486     | NA       | NA                   |
| 7313 | 19 | 39275684 | 39275684 | T | A | T | W | intergenic | NA         | NA       | NA                   |
| 7313 | 19 | 41605291 | 41605291 | C | A | C | M | ncRNA      | LOC644189  | NA       | NA                   |
| 7313 | 19 | 41809402 | 41809402 | C | A | C | M | exonic     | ZNF382     | missense | NM_032825:p.L255I    |
| 7313 | 19 | 42561932 | 42561932 | A | C | A | M | exonic     | ZNF527     | missense | NM_032453:p.Q35P     |
| 7313 | 19 | 47003028 | 47003028 | A | T | A | W | intronic   | CEACAM3    | NA       | NA                   |
| 7313 | 19 | 47603643 | 47603643 | C | T | C | Y | exonic     | LIPE       | silent   | NM_005357:p.G599G    |
| 7313 | 19 | 56072036 | 56072036 | T | A | T | W | exonic     | KLK2       | nonsense | NM_005551:p.L197X    |
| 7313 | 19 | 57086239 | 57086239 | C | A | C | M | exonic     | ZNF649     | missense | NM_023074:p.S321I    |
| 7313 | 19 | 58034541 | 58034541 | G | C | G | S | UTR3       | ZNF468     | NA       | NA                   |
| 7313 | 19 | 59237144 | 59237144 | G | A | G | R | intronic   | VSTM1      | NA       | NA                   |
| 7313 | 19 | 59798003 | 59798003 | C | A | C | M | exonic     | LILRA1     | silent   | NM_006863:p.P44P     |
| 7313 | 19 | 59970548 | 59970548 | G | T | G | K | intergenic | NA         | NA       | NA                   |
| 7313 | 19 | 60069725 | 60069725 | C | A | C | M | intronic   | KIR3DL2    | NA       | NA                   |
| 7313 | 19 | 60381452 | 60381452 | G | C | G | S | exonic     | SYT5       | missense | NM_003180:p.T59R     |
| 7313 | 19 | 60403676 | 60403676 | T | A | T | W | exonic     | PTPRH      | missense | NM_001161440:p.N209I |
| 7313 | 19 | 61055539 | 61055539 | G | T | G | K | splicing   | NLRP4      | NA       | NA                   |
| 7313 | 19 | 61114976 | 61114976 | A | T | A | W | exonic     | NLRP13     | silent   | NM_176810:p.A673A    |
| 7313 | 19 | 61525318 | 61525318 | C | G | C | S | intergenic | NA         | NA       | NA                   |
| 7313 | 19 | 62434919 | 62434919 | C | T | C | Y | intronic   | AURKC      | NA       | NA                   |
| 7313 | 19 | 62561113 | 62561113 | G | A | G | R | UTR3       | ZNF304     | NA       | NA                   |
| 7313 | 20 | 1517206  | 1517206  | C | A | C | M | intronic   | SIRPB1     | NA       | NA                   |
| 7313 | 20 | 2346056  | 2346056  | C | A | C | M | exonic     | TGM6       | silent   | NM_198994:p.P505P    |
| 7313 | 20 | 2361321  | 2361321  | G | T | G | K | UTR3       | TGM6       | NA       | NA                   |
| 7313 | 20 | 3952832  | 3952832  | G | T | G | K | intergenic | NA         | NA       | NA                   |
| 7313 | 20 | 8718179  | 8718179  | T | C | T | Y | exonic     | PLCB1      | missense | NM_182734:p.M1098T   |
| 7313 | 20 | 22964835 | 22964835 | C | A | C | M | exonic     | SSTR4      | missense | NM_001052:p.R239S    |
| 7313 | 20 | 28223898 | 28223898 | A | C | A | M | intergenic | NA         | NA       | NA                   |
| 7313 | 20 | 29338128 | 29338128 | G | A | G | R | intergenic | NA         | NA       | NA                   |
| 7313 | 20 | 30187690 | 30187690 | T | C | T | Y | intronic   | TM9SF4     | NA       | NA                   |
| 7313 | 20 | 43439543 | 43439543 | G | T | G | K | ncRNA      | SYS1-DBNDD | NA       | NA                   |
| 7313 | 20 | 52222905 | 52222905 | C | A | C | M | exonic     | CYP24A1    | silent   | NM_001128915:p.P133P |
| 7313 | 20 | 60937761 | 60937761 | G | T | G | K | intronic   | COL9A3     | NA       | NA                   |
| 7313 | 21 | 9724380  | 9724380  | C | A | C | M | intergenic | NA         | NA       | NA                   |
| 7313 | 21 | 9963844  | 9963844  | C | A | C | M | splicing   | TPTE       | NA       | NA                   |
| 7313 | 21 | 33819186 | 33819186 | G | C | G | S | intronic   | GART       | NA       | NA                   |
| 7313 | 21 | 40662835 | 40662835 | G | T | G | K | intronic   | DSCAM      | NA       | NA                   |
| 7313 | 21 | 46144984 | 46144984 | C | T | C | Y | intronic   | PCBP3      | NA       | NA                   |
| 7313 | 22 | 15452292 | 15452292 | C | T | C | Y | exonic     | CCT8L2     | silent   | NM_014406:p.Q383Q    |
| 7313 | 22 | 15453405 | 15453405 | G | C | G | S | exonic     | CCT8L2     | silent   | NM_014406:p.P12P     |
| 7313 | 22 | 20993102 | 20993102 | T | A | T | W | ncRNA      | LOC96610   | NA       | NA                   |
| 7313 | 22 | 43975621 | 43975621 | C | A | C | M | intronic   | C22orf9    | NA       | NA                   |
| 7313 | 22 | 45083124 | 45083124 | G | A | G | R | exonic     | GTSE1      | missense | NM_016426:p.D128N    |
| 7313 | 22 | 45174373 | 45174373 | C | A | C | M | exonic     | CELSR1     | nonsense | NM_014246:p.E1773X   |
| 7313 | 22 | 45174374 | 45174374 | C | A | C | M | exonic     | CELSR1     | silent   | NM_014246:p.G1772G   |
| 7313 | X  | 2782104  | 2782104  | A | G | A | R | exonic     | GYG2       | missense | NM_003918:p.K109R    |
| 7313 | X  | 7185679  | 7185679  | G | T | G | K | intronic   | STS        | NA       | NA                   |
| 7313 | X  | 7628749  | 7628749  | G | A | G | R | intergenic | NA         | NA       | NA                   |
| 7313 | X  | 13666895 | 13666895 | A | G | A | R | exonic     | OFD1       | missense | NM_003611:p.M108V    |
| 7313 | X  | 16781680 | 16781680 | T | A | T | W | intronic   | RBBP7      | NA       | NA                   |
| 7313 | X  | 17027894 | 17027894 | G | A | G | R | intronic   | REPS2      | NA       | NA                   |
| 7313 | X  | 26146028 | 26146028 | G | T | G | K | intergenic | NA         | NA       | NA                   |
| 7313 | X  | 26425010 | 26425010 | A | T | A | W | intergenic | NA         | NA       | NA                   |
| 7313 | X  | 27447375 | 27447375 | G | T | G | K | intergenic | NA         | NA       | NA                   |
| 7313 | X  | 29883324 | 29883324 | G | A | G | R | exonic     | IL1RAPL1   | missense | NM_014271:p.M519I    |
| 7313 | X  | 30146834 | 30146834 | G | T | G | K | exonic     | MAGEB2     | silent   | NM_002364:p.A72A     |
| 7313 | X  | 36890663 | 36890663 | T | A | T | W | intergenic | NA         | NA       | NA                   |
| 7313 | X  | 40104147 | 40104147 | G | T | G | K | intergenic | NA         | NA       | NA                   |
| 7313 | X  | 48921364 | 48921364 | G | A | G | R | exonic     | PRICKLE3   | missense | NM_006150:p.R293C    |
| 7313 | X  | 57179437 | 57179437 | G | T | G | K | exonic     | SPIN2A     | missense | NM_019003:p.L107I    |
| 7313 | X  | 58028491 | 58028491 | C | G | C | S | intergenic | NA         | NA       | NA                   |
| 7313 | X  | 58028492 | 58028492 | G | A | G | R | intergenic | NA         | NA       | NA                   |
| 7313 | X  | 65307242 | 65307242 | G | A | G | R | exonic     | HEPH       | silent   | NM_138737:p.V89V     |
| 7313 | X  | 65396868 | 65396868 | C | T | C | Y | intronic   | HEPH       | NA       | NA                   |
| 7313 | X  | 69178515 | 69178515 | G | T | G | K | exonic     | AWAT2      | silent   | NM_001002254:p.P290P |
| 7313 | X  | 78465543 | 78465543 | G | T | G | K | intergenic | NA         | NA       | NA                   |
| 7313 | X  | 82701762 | 82701762 | C | A | C | M | intergenic | NA         | NA       | NA                   |
| 7313 | X  | 82701763 | 82701763 | A | G | A | R | intergenic | NA         | NA       | NA                   |
| 7313 | X  | 85954605 | 85954605 | G | T | G | K | exonic     | DACH2      | missense | NM_001139515:p.G277V |
| 7313 | X  | 87204485 | 87204485 | C | T | C | Y | intergenic | NA         | NA       | NA                   |
| 7313 | X  | 89180936 | 89180936 | G | T | G | K | intergenic | NA         | NA       | NA                   |
| 7313 | X  | 92851041 | 92851041 | A | T | A | W | UTR5       | FAM133A    | NA       | NA                   |
| 7313 | X  | 98799030 | 98799030 | C | A | C | M | ncRNA      | LOC442459  | NA       | NA                   |
| 7313 | X  | 98799032 | 98799032 | C | A | C | M | ncRNA      | LOC442459  | NA       | NA                   |

|      |    |           |           |   |   |   |      |            |           |          |                      |
|------|----|-----------|-----------|---|---|---|------|------------|-----------|----------|----------------------|
| 7313 | X  | 104365342 | 104365342 | A | G | A | R    | exonic     | IL1RAPL2  | missense | NM_017416:p.K181E    |
| 7313 | X  | 104537558 | 104537558 | C | A | C | M    | intronic   | IL1RAPL2  | NA       | NA                   |
| 7313 | X  | 107290436 | 107290436 | G | A | G | R    | exonic     | COL4A6    | missense | NM_001847:p.P1481S   |
| 7313 | X  | 113529844 | 113529844 | G | T | G | K    | intergenic | NA        | NA       | NA                   |
| 7313 | X  | 114775687 | 114775687 | C | T | C | Y    | intronic   | PLS3      | NA       | NA                   |
| 7313 | X  | 117784720 | 117784720 | G | T | G | K    | intronic   | IL13RA1   | NA       | NA                   |
| 7313 | X  | 120164680 | 120164680 | G | T | G | K    | intergenic | NA        | NA       | NA                   |
| 7313 | X  | 130506577 | 130506577 | G | T | G | K    | exonic     | OR13H1    | missense | NM_001004486:p.M283I |
| 7313 | X  | 134572387 | 134572387 | G | T | G | K    | intergenic | NA        | NA       | NA                   |
| 7313 | X  | 134923110 | 134923110 | G | A | G | R    | intronic   | SLC9A6    | NA       | NA                   |
| 7313 | X  | 135267522 | 135267522 | G | T | G | K    | intronic   | GPR112    | NA       | NA                   |
| 7313 | X  | 140820461 | 140820461 | G | C | G | S    | UTR5       | MAGEC1    | NA       | NA                   |
| 7313 | X  | 144712082 | 144712082 | C | A | C | M    | exonic     | SLITRK2   | silent   | NM_001144006:p.I149I |
| 7313 | X  | 144883546 | 144883546 | C | G | C | S    | ncRNA      | MIR890    | NA       | NA                   |
| 7313 | X  | 152685681 | 152685681 | G | A | G | R    | exonic     | PLXNB3    | missense | NM_001163257:p.G92S  |
| 7313 | Y  | 4984939   | 4984939   | G | C | G | S    | exonic     | PCDH11Y   | silent   | NM_032972:p.R25R     |
| 7313 | Y  | 6195086   | 6195086   | C | A | C | M    | intergenic | NA        | NA       | NA                   |
| 7313 | Y  | 12617983  | 12617983  | G | C | G | S    | intergenic | NA        | NA       | NA                   |
| 7313 | Y  | 15451648  | 15451648  | G | T | G | K    | exonic     | NLGN4Y    | missense | NM_014893:p.D486Y    |
| 7313 | Y  | 22876203  | 22876203  | G | T | G | K    | intergenic | NA        | NA       | NA                   |
| 7313 | Y  | 27142156  | 27142156  | G | T | G | K    | intergenic | NA        | NA       | NA                   |
| 7313 | Y  | 27170071  | 27170071  | T | A | T | W    | intergenic | NA        | NA       | NA                   |
| 7313 | Y  | 27186322  | 27186322  | G | T | G | K    | intergenic | NA        | NA       | NA                   |
| 7313 | Y  | 57442232  | 57442232  | C | A | C | M    | intergenic | NA        | NA       | NA                   |
| 7313 | M  | 11752     | 11752     | A | G | A | R    | intergenic | NA        | NA       | NA                   |
| 7945 | 1  | 62359526  | 62359526  | G | A | G | R    | exonic     | INADL     | missense | NM_176877:p.R1659K   |
| 7945 | 1  | 143563999 | 143563999 | C | T | C | Y    | intronic   | PDE4DIP   | NA       | NA                   |
| 7945 | 1  | 156908468 | 156908468 | G | A | G | R    | intronic   | SPTA1     | NA       | NA                   |
| 7945 | 1  | 157174765 | 157174765 | C | T | C | Y    | intronic   | PYHIN1    | NA       | NA                   |
| 7945 | 1  | 183031450 | 183031450 | C | T | C | Y    | exonic     | FAM129A   | missense | NM_052966:p.E691K    |
| 7945 | 1  | 212564543 | 212564543 | A | G | A | R    | intronic   | SMYD2     | NA       | NA                   |
| 7945 | 1  | 218893175 | 218893175 | G | - | T | */-G | exonic     | MARK1     | FS_del   | NM_018650:p.G616fs   |
| 7945 | 1  | 245761921 | 245761921 | G | C | G | S    | exonic     | OR2C3     | missense | NM_198074:p.N172K    |
| 7945 | 2  | 37897993  | 37897993  | A | T | A | W    | intergenic | NA        | NA       | NA                   |
| 7945 | 2  | 90968562  | 90968562  | T | G | T | K    | intergenic | NA        | NA       | NA                   |
| 7945 | 2  | 90976553  | 90976553  | G | T | G | K    | intergenic | NA        | NA       | NA                   |
| 7945 | 3  | 196776993 | 196776993 | - | C | G | */+C | UTR3       | APOD      | NA       | NA                   |
| 7945 | 4  | 25997058  | 25997058  | T | A | T | W    | intronic   | RBPJ      | NA       | NA                   |
| 7945 | 4  | 48798339  | 48798339  | C | T | C | Y    | intergenic | NA        | NA       | NA                   |
| 7945 | 5  | 134192184 | 134192184 | T | G | T | K    | intronic   | DDX46     | NA       | NA                   |
| 7945 | 6  | 46911237  | 46911237  | G | A | G | R    | exonic     | MEP1A     | silent   | NM_005588:p.A692A    |
| 7945 | 9  | 67904134  | 67904134  | C | A | C | M    | intergenic | NA        | NA       | NA                   |
| 7945 | 9  | 67921464  | 67921464  | G | T | G | K    | ncRNA      | LOC642236 | NA       | NA                   |
| 7945 | 10 | 120085028 | 120085028 | A | G | A | R    | intronic   | C10orf84  | NA       | NA                   |
| 7945 | 11 | 48774558  | 48774558  | A | C | A | M    | intergenic | NA        | NA       | NA                   |
| 7945 | 12 | 3448613   | 3448613   | C | A | C | M    | intergenic | NA        | NA       | NA                   |
| 7945 | 12 | 5973975   | 5973975   | G | A | G | R    | exonic     | VWF       | silent   | NM_000552:p.N2041N   |
| 7945 | 13 | 38164578  | 38164578  | C | T | C | Y    | exonic     | FREM2     | silent   | NM_207361:p.I1699I   |
| 7945 | 14 | 18184642  | 18184642  | A | G | A | R    | intergenic | NA        | NA       | NA                   |
| 7945 | 14 | 59934372  | 59934372  | C | T | C | Y    | intergenic | NA        | NA       | NA                   |
| 7945 | 16 | 1440569   | 1440569   | G | A | G | R    | exonic     | CLCN7     | missense | NM_001287:p.P516L    |
| 7945 | 16 | 2316067   | 2316067   | G | A | G | R    | exonic     | ABCA3     | silent   | NM_001089:p.D88D     |
| 7945 | 16 | 59647301  | 59647301  | T | A | T | W    | intergenic | NA        | NA       | NA                   |
| 7945 | 18 | 99200     | 99200     | A | C | A | M    | ncRNA      | ROCK1P1   | NA       | NA                   |
| 7945 | 18 | 16769820  | 16769820  | C | A | C | M    | intergenic | NA        | NA       | NA                   |
| 7945 | 19 | 59834432  | 59834432  | T | C | T | Y    | intronic   | LILRB1    | NA       | NA                   |
| 7945 | 19 | 59976382  | 59976382  | G | C | G | S    | intronic   | KIR2DL1   | NA       | NA                   |
| 7945 | 19 | 59976392  | 59976392  | C | T | C | Y    | intronic   | KIR2DL1   | NA       | NA                   |
| 7945 | 19 | 60193277  | 60193277  | G | A | G | R    | exonic     | NLRP2     | silent   | NM_001174082:p.T792T |
| 7945 | 21 | 9743738   | 9743738   | G | A | G | R    | intergenic | NA        | NA       | NA                   |
| 7945 | X  | 23994175  | 23994175  | G | T | G | K    | intronic   | EIF2S3    | NA       | NA                   |
| 7945 | X  | 95479086  | 95479086  | T | C | T | Y    | ncRNA      | LOC643486 | NA       | NA                   |
| 7945 | Y  | 10639408  | 10639408  | T | C | T | Y    | intergenic | NA        | NA       | NA                   |
| 7945 | Y  | 11854700  | 11854700  | C | T | C | Y    | intergenic | NA        | NA       | NA                   |
| 7945 | Y  | 11854736  | 11854736  | G | A | G | R    | intergenic | NA        | NA       | NA                   |
| 7945 | Y  | 11909697  | 11909697  | T | A | T | W    | intergenic | NA        | NA       | NA                   |
| 7945 | Y  | 57411262  | 57411262  | G | A | G | R    | intergenic | NA        | NA       | NA                   |
| 7945 | Y  | 57415656  | 57415656  | A | T | A | W    | intergenic | NA        | NA       | NA                   |
| 7996 | 1  | 50638048  | 50638048  | T | C | T | Y    | intergenic | NA        | NA       | NA                   |
| 7996 | 1  | 54214341  | 54214341  | G | A | G | R    | intergenic | NA        | NA       | NA                   |
| 7996 | 1  | 70250137  | 70250137  | C | A | C | M    | exonic     | LRRC7     | nonsense | NM_020794:p.Y320X    |
| 7996 | 1  | 70250138  | 70250138  | C | A | C | M    | exonic     | LRRC7     | missense | NM_020794:p.L321I    |
| 7996 | 1  | 91619189  | 91619189  | A | T | A | W    | intronic   | HFM1      | NA       | NA                   |
| 7996 | 1  | 109918200 | 109918200 | C | A | C | M    | intronic   | GNAI3     | NA       | NA                   |
| 7996 | 1  | 141835022 | 141835022 | G | A | G | R    | intergenic | NA        | NA       | NA                   |
| 7996 | 1  | 143635196 | 143635196 | G | A | G | R    | intronic   | PDE4DIP   | NA       | NA                   |
| 7996 | 1  | 147326540 | 147326540 | C | A | C | M    | intergenic | NA        | NA       | NA                   |
| 7996 | 1  | 147361312 | 147361312 | C | A | C | M    | intergenic | NA        | NA       | NA                   |
| 7996 | 1  | 150458098 | 150458098 | A | C | A | M    | exonic     | HRNR      | silent   | NM_001009931:p.A877A |



|      |    |           |           |   |   |   |   |            |            |          |                       |
|------|----|-----------|-----------|---|---|---|---|------------|------------|----------|-----------------------|
| 7996 | 1  | 153716158 | 153716158 | C | T | C | Y | exonic     | ASH1L      | missense | NM_018489:p.G1043R    |
| 7996 | 1  | 155946843 | 155946843 | A | G | A | R | intergenic | NA         | NA       | NA                    |
| 7996 | 1  | 155946855 | 155946855 | T | C | T | Y | intergenic | NA         | NA       | NA                    |
| 7996 | 1  | 157210169 | 157210169 | G | T | G | K | exonic     | PYHIN1     | missense | NM_198928:p.A481S     |
| 7996 | 1  | 175492926 | 175492926 | T | G | T | K | intronic   | FAM5B      | NA       | NA                    |
| 7996 | 1  | 195015086 | 195015086 | G | T | G | K | exonic     | CFHR3      | missense | NM_001166624:p.W77L   |
| 7996 | 1  | 195015087 | 195015087 | G | T | G | K | exonic     | CFHR3      | missense | NM_001166624:p.W77C   |
| 7996 | 1  | 195670714 | 195670714 | C | T | C | Y | exonic     | CRB1       | missense | NM_001193640:p.T921I  |
| 7996 | 1  | 210866093 | 210866093 | T | A | T | W | exonic     | FAM71A     | silent   | NM_153606:p.A417A     |
| 7996 | 1  | 211212800 | 211212800 | C | T | C | Y | exonic     | VASH2      | silent   | NM_024749:p.Y207Y     |
| 7996 | 1  | 214324761 | 214324761 | G | T | G | K | exonic     | USH2A      | missense | NM_206933:p.P1690H    |
| 7996 | 1  | 214324762 | 214324762 | G | T | G | K | exonic     | USH2A      | missense | NM_206933:p.P1690T    |
| 7996 | 1  | 218158271 | 218158271 | C | A | C | M | exonic     | SLC30A10   | missense | NM_018713:p.A303S     |
| 7996 | 1  | 226175740 | 226175740 | T | A | T | W | downstream | WNT9A      | NA       | NA                    |
| 7996 | 2  | 79203539  | 79203539  | C | G | C | S | exonic     | REG1A      | missense | NM_002909:p.P129R     |
| 7996 | 2  | 98883080  | 98883080  | T | C | T | Y | intronic   | C2orf55    | NA       | NA                    |
| 7996 | 2  | 218333544 | 218333544 | T | C | T | Y | intergenic | NA         | NA       | NA                    |
| 7996 | 2  | 223625884 | 223625884 | G | T | G | K | exonic     | KCNE4      | missense | NM_080671:p.G31V      |
| 7996 | 3  | 1746873   | 1746873   | T | G | T | K | intergenic | NA         | NA       | NA                    |
| 7996 | 3  | 2762405   | 2762405   | G | T | G | K | intronic   | CNTN4      | NA       | NA                    |
| 7996 | 3  | 8518720   | 8518720   | T | C | T | Y | intronic   | LMCD1      | NA       | NA                    |
| 7996 | 3  | 9081312   | 9081312   | C | A | C | M | intronic   | SRGAP3     | NA       | NA                    |
| 7996 | 3  | 40532277  | 40532277  | G | T | G | K | ncRNA      | ZNF620     | NA       | NA                    |
| 7996 | 3  | 152648252 | 152648252 | C | T | C | Y | exonic     | IGSF10     | missense | NM_178822:p.R736H     |
| 7996 | 3  | 156689308 | 156689308 | G | T | G | K | intronic   | PLCH1      | NA       | NA                    |
| 7996 | 3  | 167030624 | 167030624 | G | C | G | S | exonic     | BCHE       | missense | NM_000055:p.Q298E     |
| 7996 | 3  | 180665617 | 180665617 | T | A | T | W | intergenic | NA         | NA       | NA                    |
| 7996 | 4  | 35811396  | 35811396  | T | C | T | Y | exonic     | ARAP2      | missense | NM_015230:p.I1092V    |
| 7996 | 4  | 46420759  | 46420759  | C | A | C | M | intergenic | NA         | NA       | NA                    |
| 7996 | 4  | 48805292  | 48805292  | A | C | A | M | intergenic | NA         | NA       | NA                    |
| 7996 | 4  | 48817906  | 48817906  | C | T | C | Y | intergenic | NA         | NA       | NA                    |
| 7996 | 4  | 48836538  | 48836538  | C | G | C | S | intergenic | NA         | NA       | NA                    |
| 7996 | 4  | 49211709  | 49211709  | C | G | C | S | intergenic | NA         | NA       | NA                    |
| 7996 | 4  | 100356315 | 100356315 | A | T | A | W | ncRNA      | LOC1005070 | NA       | NA                    |
| 7996 | 4  | 110672006 | 110672006 | G | A | G | R | exonic     | SEC24B     | missense | NM_001042734:p.G1055D |
| 7996 | 4  | 120534649 | 120534649 | C | T | C | Y | intergenic | NA         | NA       | NA                    |
| 7996 | 4  | 126590385 | 126590385 | G | A | G | R | exonic     | FAT4       | missense | NM_024582:p.A2922T    |
| 7996 | 5  | 1245269   | 1245269   | A | G | A | R | intergenic | NA         | NA       | NA                    |
| 7996 | 5  | 54984350  | 54984350  | C | A | C | M | intronic   | SLC38A9    | NA       | NA                    |
| 7996 | 5  | 70854394  | 70854394  | G | A | G | R | exonic     | BDP1       | missense | NM_018429:p.G1750D    |
| 7996 | 5  | 91175507  | 91175507  | T | A | T | W | intergenic | NA         | NA       | NA                    |
| 7996 | 5  | 125972136 | 125972136 | A | T | A | W | intronic   | PHAX       | NA       | NA                    |
| 7996 | 5  | 140543397 | 140543397 | C | A | C | M | exonic     | PCDHB16    | nonsense | NM_020957:p.S360X     |
| 7996 | 5  | 167815062 | 167815062 | A | C | A | M | exonic     | WWC1       | missense | NM_001161662:p.K928Q  |
| 7996 | 6  | 10803254  | 10803254  | T | C | T | Y | exonic     | PAK1IP1    | missense | NM_017906:p.V17A      |
| 7996 | 6  | 21063796  | 21063796  | G | A | G | R | splicing   | CDKAL1     | NA       | NA                    |
| 7996 | 6  | 29688937  | 29688937  | C | A | C | M | intronic   | GABBR1     | NA       | NA                    |
| 7996 | 6  | 97446007  | 97446007  | G | A | G | R | intronic   | NDUFA4     | NA       | NA                    |
| 7996 | 6  | 105331691 | 105331691 | C | A | C | M | intronic   | HACE1      | NA       | NA                    |
| 7996 | 6  | 113651336 | 113651336 | G | A | G | R | intergenic | NA         | NA       | NA                    |
| 7996 | 6  | 159103153 | 159103153 | A | G | A | R | exonic     | SYTL3      | missense | NM_001009991:p.N423S  |
| 7996 | 6  | 167035904 | 167035904 | C | T | C | Y | intronic   | RPS6KA2    | NA       | NA                    |
| 7996 | 6  | 167035914 | 167035914 | G | T | G | K | intronic   | RPS6KA2    | NA       | NA                    |
| 7996 | 6  | 167035915 | 167035915 | C | T | C | Y | intronic   | RPS6KA2    | NA       | NA                    |
| 7996 | 7  | 75012066  | 75012066  | C | A | C | M | intronic   | HIP1       | NA       | NA                    |
| 7996 | 7  | 114090868 | 114090868 | T | G | T | K | ncRNA      | FOXP2      | NA       | NA                    |
| 7996 | 7  | 132504797 | 132504797 | G | T | G | K | intergenic | NA         | NA       | NA                    |
| 7996 | 7  | 137776759 | 137776759 | C | T | C | Y | intergenic | NA         | NA       | NA                    |
| 7996 | 7  | 143446813 | 143446813 | T | C | T | Y | intergenic | NA         | NA       | NA                    |
| 7996 | 8  | 15708618  | 15708618  | A | G | A | R | intergenic | NA         | NA       | NA                    |
| 7996 | 8  | 34851679  | 34851679  | A | G | A | R | intergenic | NA         | NA       | NA                    |
| 7996 | 8  | 53188343  | 53188343  | T | A | T | W | exonic     | ST18       | missense | NM_014682:p.I1038F    |
| 7996 | 8  | 54304587  | 54304587  | G | C | G | S | exonic     | OPRK1      | missense | NM_000912:p.N322K     |
| 7996 | 8  | 59926946  | 59926946  | A | C | A | M | intronic   | TOX        | NA       | NA                    |
| 7996 | 9  | 26989622  | 26989622  | G | C | G | S | exonic     | LRRC19     | missense | NM_022901:p.S24C      |
| 7996 | 9  | 33913820  | 33913820  | A | T | A | W | exonic     | UBAP2      | missense | NM_018449:p.S923R     |
| 7996 | 9  | 44010709  | 44010709  | C | T | C | Y | intergenic | NA         | NA       | NA                    |
| 7996 | 9  | 67915914  | 67915914  | C | G | C | S | intergenic | NA         | NA       | NA                    |
| 7996 | 9  | 67923330  | 67923330  | C | G | C | S | ncRNA      | LOC642236  | NA       | NA                    |
| 7996 | 9  | 67945007  | 67945007  | G | C | G | S | upstream   | LOC642236  | NA       | NA                    |
| 7996 | 9  | 67945015  | 67945015  | A | T | A | W | upstream   | LOC642236  | NA       | NA                    |
| 7996 | 9  | 68118678  | 68118678  | T | G | T | K | ncRNA      | LOC1001323 | NA       | NA                    |
| 7996 | 9  | 70818216  | 70818216  | A | C | A | M | exonic     | PRKACG     | missense | NM_002732:p.Y205D     |
| 7996 | 9  | 84805423  | 84805423  | C | A | C | M | intronic   | RASEF      | NA       | NA                    |
| 7996 | 9  | 115971349 | 115971349 | G | A | G | R | exonic     | COL27A1    | missense | NM_032888:p.D565N     |
| 7996 | 9  | 131927085 | 131927085 | T | C | T | Y | intronic   | GPR107     | NA       | NA                    |
| 7996 | 9  | 138995179 | 138995179 | C | T | C | Y | intronic   | PTGDS      | NA       | NA                    |
| 7996 | 9  | 139316210 | 139316210 | C | A | C | M | UTR5       | NRARP      | NA       | NA                    |
| 7996 | 10 | 31046134  | 31046134  | T | C | T | Y | intergenic | NA         | NA       | NA                    |

|      |    |           |           |   |   |   |      |            |           |          |                      |
|------|----|-----------|-----------|---|---|---|------|------------|-----------|----------|----------------------|
| 7996 | 10 | 70074724  | 70074724  | A | G | A | R    | exonic     | TET1      | silent   | NM_030625:p.K744K    |
| 7996 | 10 | 78502956  | 78502956  | C | A | C | M    | exonic     | KCNMA1    | missense | NM_001161352:p.A552S |
| 7996 | 10 | 98101167  | 98101167  | A | C | A | M    | intronic   | OPALIN    | NA       | NA                   |
| 7996 | 10 | 127573963 | 127573963 | C | G | C | S    | intergenic | NA        | NA       | NA                   |
| 7996 | 11 | 6847814   | 6847814   | G | T | G | K    | exonic     | OR10A2    | missense | NM_001004460:p.A85S  |
| 7996 | 11 | 34090188  | 34090188  | A | G | A | R    | exonic     | NAT10     | missense | NM_024662:p.R72G     |
| 7996 | 11 | 49899319  | 49899319  | C | A | C | M    | intergenic | NA        | NA       | NA                   |
| 7996 | 11 | 55163056  | 55163056  | A | T | A | W    | exonic     | OR4P4     | missense | NM_001004124:p.Y216F |
| 7996 | 11 | 103413501 | 103413501 | C | G | C | S    | exonic     | DDI1      | missense | NM_001001711:p.N247K |
| 7996 | 11 | 119853031 | 119853031 | T | G | T | K    | intronic   | ARHGFE12  | NA       | NA                   |
| 7996 | 11 | 122436212 | 122436212 | T | C | T | Y    | intronic   | HSPA8     | NA       | NA                   |
| 7996 | 11 | 125010623 | 125010623 | G | T | G | K    | exonic     | CHEK1     | missense | NM_001114121:p.D235Y |
| 7996 | 12 | 31137509  | 31137509  | C | T | C | Y    | exonic     | DDX11     | silent   | NM_030653:p.F451F    |
| 7996 | 12 | 47169027  | 47169027  | T | C | T | Y    | intronic   | C12orf54  | NA       | NA                   |
| 7996 | 12 | 54890445  | 54890445  | C | T | C | Y    | exonic     | RNF41     | missense | NM_194358:p.G18S     |
| 7996 | 12 | 56302881  | 56302881  | T | C | T | Y    | exonic     | SLC26A10  | missense | NM_133489:p.I279T    |
| 7996 | 12 | 72850716  | 72850716  | A | T | A | W    | intergenic | NA        | NA       | NA                   |
| 7996 | 12 | 125915514 | 125915514 | T | G | T | K    | intergenic | NA        | NA       | NA                   |
| 7996 | 13 | 18152863  | 18152863  | G | T | G | K    | intergenic | NA        | NA       | NA                   |
| 7996 | 14 | 60686532  | 60686532  | C | T | C | Y    | intergenic | NA        | NA       | NA                   |
| 7996 | 14 | 71274712  | 71274712  | A | T | A | W    | splicing   | SIPA1L1   | missense | NM_015556:p.S1730C   |
| 7996 | 14 | 74607194  | 74607194  | G | A | G | R    | exonic     | FAM164C   | silent   | NM_024643:p.K55K     |
| 7996 | 15 | 19037939  | 19037939  | G | T | G | K    | ncRNA      | GOLGA8C   | NA       | NA                   |
| 7996 | 15 | 46595721  | 46595721  | C | A | C | M    | exonic     | FBN1      | silent   | NM_000138:p.P426P    |
| 7996 | 15 | 49072982  | 49072982  | G | A | G | R    | exonic     | AP4E1     | missense | NM_007347:p.M738I    |
| 7996 | 15 | 54470875  | 54470875  | A | G | A | R    | exonic     | TEX9      | missense | NM_198524:p.I180V    |
| 7996 | 15 | 56640508  | 56640508  | C | T | C | Y    | intronic   | LIPC      | NA       | NA                   |
| 7996 | 15 | 62293415  | 62293415  | T | G | T | K    | intronic   | CSNK1G1   | NA       | NA                   |
| 7996 | 15 | 66774636  | 66774636  | C | A | C | M    | exonic     | CORO2B    | nonsense | NM_001190457:p.S102X |
| 7996 | 15 | 66774637  | 66774637  | G | C | G | S    | exonic     | CORO2B    | silent   | NM_001190457:p.S102S |
| 7996 | 16 | 1810083   | 1810083   | G | C | G | S    | intronic   | HAGH      | NA       | NA                   |
| 7996 | 16 | 17119217  | 17119217  | C | T | C | Y    | exonic     | XYLT1     | missense | NM_022166:p.V782I    |
| 7996 | 16 | 20601264  | 20601264  | G | T | G | K    | exonic     | ACSM1     | silent   | NM_052956:p.T142T    |
| 7996 | 16 | 30005705  | 30005705  | A | G | A | R    | intronic   | TBX6      | NA       | NA                   |
| 7996 | 16 | 33882738  | 33882738  | T | G | T | K    | intergenic | NA        | NA       | NA                   |
| 7996 | 16 | 74220863  | 74220863  | T | C | T | Y    | exonic     | KARS      | missense | NM_001130089:p.E529G |
| 7996 | 16 | 84269605  | 84269605  | G | T | G | K    | intronic   | GINS2     | NA       | NA                   |
| 7996 | 17 | 7519188   | 7519188   | C | G | C | S    | exonic     | TP53      | missense | NM_001126117:p.R24P  |
| 7996 | 17 | 31022867  | 31022867  | T | - | C | */-T | intronic   | AP2B1     | NA       | NA                   |
| 7996 | 17 | 43408333  | 43408333  | A | G | A | R    | exonic     | CDK5RAP3  | silent   | NM_176096:p.E251E    |
| 7996 | 17 | 50397023  | 50397023  | A | T | A | W    | ncRNA      | COX11     | NA       | NA                   |
| 7996 | 17 | 53413139  | 53413139  | G | C | G | S    | exonic     | VEZF1     | missense | NM_007146:p.T267S    |
| 7996 | 17 | 54043726  | 54043726  | A | - | G | */-A | intronic   | TEX14     | NA       | NA                   |
| 7996 | 18 | 98741     | 98741     | A | T | A | W    | upstream   | ROCK1P1   | NA       | NA                   |
| 7996 | 18 | 3492541   | 3492541   | G | A | G | R    | exonic     | DLGAP1    | missense | NM_004746:p.H892Y    |
| 7996 | 18 | 16771292  | 16771292  | T | G | T | K    | intergenic | NA        | NA       | NA                   |
| 7996 | 18 | 32552519  | 32552519  | G | T | G | K    | exonic     | FHOD3     | missense | NM_025135:p.R912L    |
| 7996 | 18 | 56482476  | 56482476  | G | T | G | K    | intergenic | NA        | NA       | NA                   |
| 7996 | 18 | 75576410  | 75576410  | G | A | G | R    | exonic     | CTDP1     | silent   | NM_004715:p.T654T    |
| 7996 | 19 | 4122710   | 4122710   | C | A | C | M    | exonic     | CREB3L3   | missense | NM_032607:p.P377Q    |
| 7996 | 19 | 20362507  | 20362507  | C | A | C | M    | intergenic | NA        | NA       | NA                   |
| 7996 | 19 | 39614714  | 39614714  | G | T | G | K    | intronic   | UBA2      | NA       | NA                   |
| 7996 | 19 | 43925491  | 43925491  | C | G | C | S    | intronic   | CAPN12    | NA       | NA                   |
| 7996 | 19 | 47601553  | 47601553  | C | G | C | S    | splicing   | LIPE      | missense | NM_005357:p.G789A    |
| 7996 | 19 | 51080101  | 51080101  | C | A | C | M    | exonic     | IRF2BP1   | missense | NM_015649:p.A258S    |
| 7996 | 19 | 53229401  | 53229401  | G | A | G | R    | exonic     | CABP5     | silent   | NM_019855:p.L127L    |
| 7996 | 19 | 59417894  | 59417894  | C | T | C | Y    | intronic   | LILRB3    | NA       | NA                   |
| 7996 | 19 | 59446590  | 59446590  | G | A | G | R    | exonic     | LILRB5    | missense | NM_006840:p.P549S    |
| 7996 | 19 | 59913765  | 59913765  | C | T | C | Y    | ncRNA      | LILRP2    | NA       | NA                   |
| 7996 | 20 | 6707376   | 6707376   | C | T | C | Y    | exonic     | BMP2      | silent   | NM_001200:p.H277H    |
| 7996 | 20 | 23914221  | 23914221  | C | T | C | Y    | intronic   | GGTLC1    | NA       | NA                   |
| 7996 | 21 | 18666285  | 18666285  | A | T | A | W    | intronic   | TMPRSS15  | NA       | NA                   |
| 7996 | 21 | 19539790  | 19539790  | G | T | G | K    | intergenic | NA        | NA       | NA                   |
| 7996 | 22 | 29268813  | 29268813  | C | A | C | M    | intronic   | LOC730005 | NA       | NA                   |
| 7996 | 22 | 29268814  | 29268814  | C | A | C | M    | intronic   | LOC730005 | NA       | NA                   |
| 7996 | 22 | 29341366  | 29341366  | C | A | C | M    | exonic     | TCN2      | missense | NM_000355:p.T220N    |
| 7996 | 22 | 38692185  | 38692185  | T | C | T | Y    | intronic   | GRAP2     | NA       | NA                   |
| 7996 | 22 | 42405425  | 42405425  | G | A | G | R    | intronic   | EFCAB6    | NA       | NA                   |
| 7996 | X  | 23322169  | 23322169  | A | G | A | R    | exonic     | PTCHD1    | silent   | NM_173495:p.V871V    |
| 7996 | X  | 26122677  | 26122677  | G | A | G | R    | exonic     | MAGEB6    | missense | NM_173523:p.V265I    |
| 7996 | X  | 29324443  | 29324443  | T | A | T | W    | exonic     | IL1RAPL1  | missense | NM_014271:p.F170L    |
| 7996 | X  | 35895716  | 35895716  | C | A | C | M    | exonic     | CXorf21   | missense | NM_152632:p.R554S    |
| 7996 | X  | 44588376  | 44588376  | C | G | C | S    | exonic     | DUSP21    | silent   | NM_022076:p.S18S     |
| 7996 | X  | 48191788  | 48191788  | G | T | G | K    | intergenic | NA        | NA       | NA                   |
| 7996 | X  | 67920209  | 67920209  | C | A | C | M    | intergenic | NA        | NA       | NA                   |
| 7996 | X  | 72350466  | 72350466  | A | G | A | R    | exonic     | NAP1L2    | silent   | NM_021963:p.Y196Y    |
| 7996 | X  | 79716293  | 79716293  | G | T | G | K    | intergenic | NA        | NA       | NA                   |
| 7996 | X  | 79886456  | 79886456  | A | C | A | M    | intronic   | BRWD3     | NA       | NA                   |
| 7996 | X  | 87895347  | 87895347  | T | A | T | W    | exonic     | CPXCR1    | silent   | NM_033048:p.L92L     |

|         |    |           |           |     |   |   |        |            |           |          |                      |
|---------|----|-----------|-----------|-----|---|---|--------|------------|-----------|----------|----------------------|
| 7996    | X  | 92364181  | 92364181  | G   | A | G | R      | intergenic | NA        | NA       | NA                   |
| 7996    | X  | 92364182  | 92364182  | G   | T | G | K      | intergenic | NA        | NA       | NA                   |
| 7996    | X  | 102221675 | 102221675 | C   | T | C | Y      | intronic   | NXF3      | NA       | NA                   |
| 7996    | X  | 137577543 | 137577543 | C   | A | C | M      | ncRNA      | MIR504    | NA       | NA                   |
| 7996    | X  | 138866003 | 138866003 | G   | A | G | R      | exonic     | CXorf66   | silent   | NM_001013403:p.P268P |
| 7996    | X  | 144917128 | 144917128 | A   | T | A | W      | upstream   | MIR891A   | NA       | NA                   |
| 7996    | X  | 144917133 | 144917133 | C   | T | C | Y      | upstream   | MIR891A   | NA       | NA                   |
| 7996    | X  | 148851571 | 148851571 | T   | A | T | W      | exonic     | CXorf40B  | missense | NM_001013845:p.N109I |
| 7996    | X  | 153662821 | 153662821 | A   | G | A | R      | intronic   | MPP1      | NA       | NA                   |
| 7996    | Y  | 10647908  | 10647908  | G   | A | G | R      | intergenic | NA        | NA       | NA                   |
| 7996    | Y  | 11784056  | 11784056  | A   | T | A | W      | intergenic | NA        | NA       | NA                   |
| 7996    | Y  | 11935811  | 11935811  | C   | G | C | S      | intergenic | NA        | NA       | NA                   |
| 7996    | M  | 12697     | 12697     | T   | C | T | Y      | intergenic | NA        | NA       | NA                   |
| L383    | 1  | 200440312 | 200440312 | A   | C | A | M      | intronic   | LGR6      | NA       | NA                   |
| L383    | 2  | 94902803  | 94902803  | C   | T | C | Y      | intronic   | TEKT4     | NA       | NA                   |
| L383    | 3  | 75869463  | 75869463  | T   | A | T | W      | exonic     | ZNF717    | missense | NM_001128223:p.R667S |
| L383    | 5  | 3377294   | 3377294   | T   | A | T | W      | intergenic | NA        | NA       | NA                   |
| L383    | 6  | 43275631  | 43275631  | G   | T | G | K      | intronic   | CUL9      | NA       | NA                   |
| L383    | 7  | 156426889 | 156426889 | C   | A | C | M      | intergenic | NA        | NA       | NA                   |
| L383    | 8  | 144476524 | 144476524 | A   | C | A | M      | intronic   | TOP1MT    | NA       | NA                   |
| L383    | 8  | 144476525 | 144476525 | C   | A | C | M      | intronic   | TOP1MT    | NA       | NA                   |
| L383    | 9  | 110049828 | 110049828 | C   | T | C | Y      | intergenic | NA        | NA       | NA                   |
| L383    | 11 | 6489304   | 6489304   | T   | A | T | W      | intronic   | DNHD1     | NA       | NA                   |
| L383    | 12 | 123467567 | 123467567 | C   | T | C | Y      | intronic   | NCOR2     | NA       | NA                   |
| L383    | 12 | 131208592 | 131208594 | CAC | - | A | #NAME? | intergenic | NA        | NA       | NA                   |
| L383    | 20 | 20180224  | 20180224  | C   | A | C | M      | intronic   | C20orf26  | NA       | NA                   |
| L383    | 20 | 20191540  | 20191540  | A   | T | A | W      | intronic   | C20orf26  | NA       | NA                   |
| L383    | X  | 144885857 | 144885857 | C   | G | C | S      | downstream | MIR892A   | NA       | NA                   |
| LU-1516 | 1  | 19293969  | 19293969  | G   | A | G | R      | intronic   | UBR4      | NA       | NA                   |
| LU-1516 | 1  | 89370392  | 89370392  | G   | C | G | S      | UTR3       | GBP7      | NA       | NA                   |
| LU-1516 | 1  | 245090919 | 245090919 | G   | A | G | R      | exonic     | AHCTF1    | missense | NM_015446:p.A1355V   |
| LU-1516 | 1  | 246233613 | 246233613 | G   | T | G | K      | UTR5       | OR2L13    | NA       | NA                   |
| LU-1516 | 1  | 246233619 | 246233619 | C   | T | C | Y      | UTR5       | OR2L13    | NA       | NA                   |
| LU-1516 | 3  | 76566864  | 76566864  | G   | T | G | K      | intergenic | NA        | NA       | NA                   |
| LU-1516 | 4  | 190770309 | 190770309 | T   | C | T | Y      | intergenic | NA        | NA       | NA                   |
| LU-1516 | 5  | 2199043   | 2199043   | G   | A | G | R      | intergenic | NA        | NA       | NA                   |
| LU-1516 | 5  | 67605579  | 67605579  | C   | T | C | Y      | exonic     | PIK3R1    | nonsense | NM_181523:p.R162X    |
| LU-1516 | 5  | 102460451 | 102460451 | G   | A | G | R      | intronic   | GIN1      | NA       | NA                   |
| LU-1516 | 6  | 31233141  | 31233141  | C   | A | C | M      | splicing   | CCHCR1    | missense | NM_001105563:p.R72S  |
| LU-1516 | 6  | 33368166  | 33368166  | T   | C | T | Y      | intronic   | RGL2      | NA       | NA                   |
| LU-1516 | 6  | 33368167  | 33368167  | T   | C | T | Y      | intronic   | RGL2      | NA       | NA                   |
| LU-1516 | 6  | 33485488  | 33485488  | G   | T | G | K      | UTR3       | KIF1      | NA       | NA                   |
| LU-1516 | 6  | 52872771  | 52872771  | A   | G | A | R      | exonic     | GSTA3     | missense | NM_000847:p.C112R    |
| LU-1516 | 6  | 117860189 | 117860189 | T   | A | T | W      | intergenic | NA        | NA       | NA                   |
| LU-1516 | 6  | 165666478 | 165666478 | G   | T | G | K      | UTR3       | PDE10A    | NA       | NA                   |
| LU-1516 | 7  | 55227009  | 55227009  | T   | G | T | K      | exonic     | EGFR      | missense | NM_005228:p.L858R    |
| LU-1516 | 8  | 87311171  | 87311171  | C   | T | C | Y      | exonic     | SLC7A13   | missense | NM_138817:p.R151H    |
| LU-1516 | 10 | 124637927 | 124637927 | C   | A | C | M      | ncRNA      | LOC399815 | NA       | NA                   |
| LU-1516 | 12 | 38964072  | 38964072  | C   | G | C | S      | exonic     | LRRK2     | silent   | NM_198578:p.L790L    |
| LU-1516 | 16 | 33864714  | 33864714  | C   | T | C | Y      | intergenic | NA        | NA       | NA                   |
| LU-1516 | 16 | 33866529  | 33866529  | C   | T | C | Y      | intergenic | NA        | NA       | NA                   |
| LU-1516 | 17 | 55442500  | 55442500  | C   | T | C | Y      | ncRNA      | DHX40P1   | NA       | NA                   |
| LU-1516 | 19 | 431885    | 431885    | G   | A | G | R      | intergenic | NA        | NA       | NA                   |
| LU-1516 | 19 | 60130753  | 60130753  | A   | C | A | M      | intronic   | NLRP7     | NA       | NA                   |
| LU-1516 | 20 | 28194708  | 28194708  | C   | T | C | Y      | intergenic | NA        | NA       | NA                   |
| LU-1516 | 20 | 28247937  | 28247937  | T   | A | T | W      | downstream | FRG1B     | NA       | NA                   |
| LU-1516 | 20 | 32965187  | 32965187  | C   | G | C | S      | intronic   | ACSS2     | NA       | NA                   |
| LU-1516 | 21 | 9787809   | 9787809   | A   | T | A | W      | intergenic | NA        | NA       | NA                   |
| LU-1516 | 21 | 10151969  | 10151969  | G   | A | G | R      | intergenic | NA        | NA       | NA                   |
| LU-1516 | 22 | 19652333  | 19652333  | C   | T | C | Y      | intronic   | AIFM3     | NA       | NA                   |
| LU-1516 | 22 | 40727501  | 40727501  | G   | T | G | K      | intronic   | WBP2NL    | NA       | NA                   |
| LU-1516 | X  | 9824045   | 9824045   | C   | A | C | M      | exonic     | SHROOM2   | silent   | NM_001649:p.R699R    |
| LU-1516 | X  | 9824046   | 9824046   | C   | A | C | M      | exonic     | SHROOM2   | missense | NM_001649:p.R700S    |
| LU-1516 | X  | 46930399  | 46930399  | A   | G | A | R      | intronic   | RBM10     | NA       | NA                   |
| LU-1800 | 1  | 121056572 | 121056572 | A   | G | A | R      | intergenic | NA        | NA       | NA                   |
| LU-1800 | 1  | 141602184 | 141602184 | A   | G | A | R      | intergenic | NA        | NA       | NA                   |
| LU-1800 | 3  | 135036120 | 135036120 | C   | G | C | S      | exonic     | RAB6B     | missense | NM_016577:p.S184T    |
| LU-1800 | 6  | 42131521  | 42131521  | C   | G | C | S      | intronic   | TAF8      | NA       | NA                   |
| LU-1800 | 7  | 137984484 | 137984484 | A   | G | A | R      | intronic   | SVOPL     | NA       | NA                   |
| LU-1800 | 7  | 137984486 | 137984486 | G   | A | G | R      | intronic   | SVOPL     | NA       | NA                   |
| LU-1800 | 9  | 67974445  | 67974445  | C   | T | C | Y      | intergenic | NA        | NA       | NA                   |
| LU-1800 | 10 | 41937008  | 41937008  | T   | G | T | K      | intergenic | NA        | NA       | NA                   |
| LU-1800 | 12 | 54850328  | 54850328  | C   | T | C | Y      | intronic   | SMARCC2   | NA       | NA                   |
| LU-1800 | 17 | 63149275  | 63149275  | T   | A | T | W      | intronic   | NOL11     | NA       | NA                   |
| LU-1800 | 20 | 28217222  | 28217222  | A   | C | A | M      | intergenic | NA        | NA       | NA                   |
| LU-1800 | 21 | 10145748  | 10145748  | G   | A | G | R      | intergenic | NA        | NA       | NA                   |
| LU-1800 | Y  | 11760378  | 11760378  | T   | A | T | W      | intergenic | NA        | NA       | NA                   |
| LU-1800 | Y  | 11760388  | 11760388  | G   | C | G | S      | intergenic | NA        | NA       | NA                   |
| LU-1991 | 1  | 16789296  | 16789296  | C   | G | C | S      | intronic   | NBPF1     | NA       | NA                   |

|         |   |           |           |   |   |   |   |            |            |          |                       |
|---------|---|-----------|-----------|---|---|---|---|------------|------------|----------|-----------------------|
| LU-1991 | 1 | 17404284  | 17404284  | G | A | G | R | UTR5       | PAD11      | NA       | NA                    |
| LU-1991 | 1 | 21098695  | 21098695  | A | G | A | R | intronic   | EIF4G3     | NA       | NA                    |
| LU-1991 | 1 | 28529703  | 28529703  | C | A | C | M | UTR5       | MED18      | NA       | NA                    |
| LU-1991 | 1 | 32338837  | 32338837  | A | G | A | R | intronic   | TMEM398B   | NA       | NA                    |
| LU-1991 | 1 | 32442294  | 32442294  | G | T | G | K | intronic   | CCDC28B    | NA       | NA                    |
| LU-1991 | 1 | 33840574  | 33840574  | C | A | C | M | exonic     | CSMD2      | missense | NM_052896:p.G2233V    |
| LU-1991 | 1 | 34234976  | 34234976  | G | T | G | K | intronic   | CSMD2      | NA       | NA                    |
| LU-1991 | 1 | 36156092  | 36156092  | C | T | C | Y | intronic   | EIF2C1     | NA       | NA                    |
| LU-1991 | 1 | 39090761  | 39090761  | C | T | C | Y | intronic   | RRAGC      | NA       | NA                    |
| LU-1991 | 1 | 41235598  | 41235598  | C | A | C | M | intronic   | CTP5       | NA       | NA                    |
| LU-1991 | 1 | 45041695  | 45041695  | C | G | C | S | intronic   | PLK3       | NA       | NA                    |
| LU-1991 | 1 | 45308301  | 45308301  | A | G | A | R | intronic   | ZSWIM5     | NA       | NA                    |
| LU-1991 | 1 | 55052246  | 55052246  | C | A | C | M | intronic   | C1orf177   | NA       | NA                    |
| LU-1991 | 1 | 57144855  | 57144855  | C | G | C | S | intronic   | C8A        | NA       | NA                    |
| LU-1991 | 1 | 62768926  | 62768926  | T | A | T | W | intronic   | DOCK7      | NA       | NA                    |
| LU-1991 | 1 | 67211197  | 67211197  | T | G | T | K | exonic     | MIER1      | missense | NM_001146112:p.C266G  |
| LU-1991 | 1 | 75880099  | 75880099  | C | A | C | M | intergenic | NA         | NA       | NA                    |
| LU-1991 | 1 | 77760111  | 77760111  | G | T | G | K | exonic     | AK5        | missense | NM_012093:p.L415F     |
| LU-1991 | 1 | 77935583  | 77935583  | C | G | C | S | UTR3       | USP33      | NA       | NA                    |
| LU-1991 | 1 | 84159381  | 84159381  | T | C | T | Y | exonic     | TTL7       | silent   | NM_024686:p.E447E     |
| LU-1991 | 1 | 94240140  | 94240140  | G | T | G | K | intronic   | ABCA4      | NA       | NA                    |
| LU-1991 | 1 | 109947476 | 109947476 | T | G | T | K | UTR3       | GNAT2      | NA       | NA                    |
| LU-1991 | 1 | 116069698 | 116069698 | C | A | C | M | splicing   | CASQ2      | NA       | NA                    |
| LU-1991 | 1 | 119903569 | 119903569 | C | A | C | M | intergenic | NA         | NA       | NA                    |
| LU-1991 | 1 | 142295772 | 142295772 | C | A | C | M | intergenic | NA         | NA       | NA                    |
| LU-1991 | 1 | 142295783 | 142295783 | A | C | A | M | intergenic | NA         | NA       | NA                    |
| LU-1991 | 1 | 142312781 | 142312781 | A | C | A | M | intergenic | NA         | NA       | NA                    |
| LU-1991 | 1 | 144982627 | 144982627 | G | A | G | R | intergenic | NA         | NA       | NA                    |
| LU-1991 | 1 | 145780406 | 145780406 | G | A | G | R | intergenic | NA         | NA       | NA                    |
| LU-1991 | 1 | 145780407 | 145780407 | G | T | G | K | intergenic | NA         | NA       | NA                    |
| LU-1991 | 1 | 148165212 | 148165212 | G | C | G | S | exonic     | SF3B4      | missense | NM_005850:p.T129S     |
| LU-1991 | 1 | 148990833 | 148990833 | G | C | G | S | intronic   | CTSS       | NA       | NA                    |
| LU-1991 | 1 | 153416390 | 153416390 | G | A | G | R | splicing   | TRIM46     | silent   | NM_025058:p.E303E     |
| LU-1991 | 1 | 154194108 | 154194108 | G | T | G | K | intronic   | ARHGFE2    | NA       | NA                    |
| LU-1991 | 1 | 154705167 | 154705167 | C | A | C | M | intronic   | MEF2D      | NA       | NA                    |
| LU-1991 | 1 | 155115563 | 155115563 | C | T | C | Y | exonic     | NTRK1      | silent   | NM_002529:p.L611L     |
| LU-1991 | 1 | 155141102 | 155141102 | C | T | C | Y | intronic   | PEAR1      | NA       | NA                    |
| LU-1991 | 1 | 155141709 | 155141709 | G | T | G | K | intronic   | PEAR1      | NA       | NA                    |
| LU-1991 | 1 | 156565843 | 156565843 | C | G | C | S | exonic     | CD1B       | missense | NM_001764:p.G276A     |
| LU-1991 | 1 | 157603259 | 157603259 | T | A | T | W | intergenic | NA         | NA       | NA                    |
| LU-1991 | 1 | 158784676 | 158784676 | C | T | C | Y | exonic     | CD84       | silent   | NM_001184882:p.V213V  |
| LU-1991 | 1 | 159285764 | 159285764 | T | G | T | K | intronic   | ARHGAP30   | NA       | NA                    |
| LU-1991 | 1 | 159921658 | 159921658 | G | A | G | R | ncRNA      | RPL31P11   | NA       | NA                    |
| LU-1991 | 1 | 172629985 | 172629985 | C | G | C | S | intronic   | RABGAP1L   | NA       | NA                    |
| LU-1991 | 1 | 174317038 | 174317038 | G | A | G | R | exonic     | RFWD2      | nonsense | NM_022457:p.R384X     |
| LU-1991 | 1 | 178418035 | 178418035 | G | T | G | K | exonic     | QSOX1      | missense | NM_001004128:p.C237F  |
| LU-1991 | 1 | 183125807 | 183125807 | C | A | C | M | intronic   | FAM129A    | NA       | NA                    |
| LU-1991 | 1 | 184423813 | 184423813 | C | G | C | S | intronic   | HMCN1      | NA       | NA                    |
| LU-1991 | 1 | 184547236 | 184547236 | A | G | A | R | exonic     | PRG4       | silent   | NM_001127708:p.A1185A |
| LU-1991 | 1 | 194911860 | 194911860 | C | A | C | M | intronic   | CFH        | NA       | NA                    |
| LU-1991 | 1 | 196928121 | 196928121 | C | T | C | Y | exonic     | PTPRC      | silent   | NM_002838:p.P30P      |
| LU-1991 | 1 | 201404786 | 201404786 | C | T | C | Y | exonic     | MYBPH      | missense | NM_004997:p.A430T     |
| LU-1991 | 1 | 208753172 | 208753172 | T | G | T | K | intronic   | HHAT       | NA       | NA                    |
| LU-1991 | 1 | 210218392 | 210218392 | G | C | G | S | exonic     | INTS7      | missense | NM_001199809:p.H390D  |
| LU-1991 | 1 | 210218393 | 210218393 | C | A | C | M | exonic     | INTS7      | missense | NM_001199809:p.L389F  |
| LU-1991 | 1 | 212237806 | 212237806 | G | C | G | S | exonic     | PROX1      | missense | NM_002763:p.Q435H     |
| LU-1991 | 1 | 213920329 | 213920329 | G | A | G | R | exonic     | USH2A      | nonsense | NM_206933:p.Q4027X    |
| LU-1991 | 1 | 214436544 | 214436544 | G | C | G | S | exonic     | USH2A      | missense | NM_007123:p.Q1409E    |
| LU-1991 | 1 | 214532180 | 214532180 | C | T | C | Y | exonic     | USH2A      | silent   | NM_007123:p.G600G     |
| LU-1991 | 1 | 214658659 | 214658659 | G | C | G | S | intronic   | USH2A      | NA       | NA                    |
| LU-1991 | 1 | 218245353 | 218245353 | A | C | A | M | intronic   | EPRS       | NA       | NA                    |
| LU-1991 | 1 | 225240900 | 225240900 | C | G | C | S | exonic     | ADCK3      | missense | NM_020247:p.L595V     |
| LU-1991 | 1 | 234220832 | 234220832 | C | A | C | M | exonic     | NID1       | missense | NM_002508:p.A969S     |
| LU-1991 | 1 | 236112337 | 236112337 | C | A | C | M | ncRNA      | LOC1001303 | NA       | NA                    |
| LU-1991 | 1 | 236157509 | 236157509 | G | T | G | K | ncRNA      | LOC1001303 | NA       | NA                    |
| LU-1991 | 1 | 241534662 | 241534662 | G | T | G | K | exonic     | SDCCAG8    | nonsense | NM_006642:p.E234X     |
| LU-1991 | 1 | 243089146 | 243089146 | A | C | A | M | intronic   | HNRNPU     | NA       | NA                    |
| LU-1991 | 1 | 246233111 | 246233111 | C | A | C | M | intronic   | OR2L13     | NA       | NA                    |
| LU-1991 | 2 | 1436657   | 1436657   | G | C | G | S | intronic   | TPO        | NA       | NA                    |
| LU-1991 | 2 | 9076100   | 9076100   | C | G | C | S | intergenic | NA         | NA       | NA                    |
| LU-1991 | 2 | 10498461  | 10498461  | T | C | T | Y | intronic   | ODC1       | NA       | NA                    |
| LU-1991 | 2 | 11252590  | 11252590  | T | A | T | W | exonic     | ROCK2      | missense | NM_004850:p.E1154V    |
| LU-1991 | 2 | 19415541  | 19415541  | G | T | G | K | exonic     | OSR1       | silent   | NM_145260:p.L259L     |
| LU-1991 | 2 | 20303151  | 20303151  | T | A | T | W | intergenic | NA         | NA       | NA                    |
| LU-1991 | 2 | 20303152  | 20303152  | G | T | G | K | intergenic | NA         | NA       | NA                    |
| LU-1991 | 2 | 21103397  | 21103397  | C | G | C | S | intronic   | APOB       | NA       | NA                    |
| LU-1991 | 2 | 21112083  | 21112083  | G | T | G | K | exonic     | APOB       | silent   | NM_000384:p.T232T     |
| LU-1991 | 2 | 24034606  | 24034606  | T | C | T | Y | intronic   | UBXN2A     | NA       | NA                    |
| LU-1991 | 2 | 25325956  | 25325956  | C | G | C | S | intronic   | DNMT3A     | NA       | NA                    |

|         |   |           |           |   |   |   |      |            |          |          |                       |
|---------|---|-----------|-----------|---|---|---|------|------------|----------|----------|-----------------------|
| LU-1991 | 2 | 25963476  | 25963476  | G | T | G | K    | intergenic | NA       | NA       | NA                    |
| LU-1991 | 2 | 26313136  | 26313136  | T | G | T | K    | intronic   | HADHA    | NA       | NA                    |
| LU-1991 | 2 | 26538102  | 26538102  | C | A | C | M    | exonic     | OTOF     | missense | NM_194248:p.W1833C    |
| LU-1991 | 2 | 26538103  | 26538103  | C | A | C | M    | exonic     | OTOF     | missense | NM_194248:p.W1833L    |
| LU-1991 | 2 | 27160005  | 27160005  | G | C | G | S    | exonic     | EMILIN1  | missense | NM_007046:p.E688Q     |
| LU-1991 | 2 | 29793994  | 29793994  | C | A | C | M    | exonic     | ALK      | missense | NM_004304:p.W247C     |
| LU-1991 | 2 | 33388025  | 33388025  | G | T | G | K    | exonic     | LTBP1    | missense | NM_206943:p.D1168Y    |
| LU-1991 | 2 | 39850514  | 39850514  | - | T | G | */+T | exonic     | THUMP2   | FS_ins   | NM_025264:p.T171fs    |
| LU-1991 | 2 | 44055401  | 44055401  | T | A | T | W    | splicing   | LRPPRC   | missense | NM_133259:p.T289S     |
| LU-1991 | 2 | 48545597  | 48545597  | G | A | G | R    | exonic     | KLRAQ1   | missense | NM_152994:p.A238T     |
| LU-1991 | 2 | 48576422  | 48576422  | A | T | A | W    | ncRNA      | KLRAQ1   | NA       | NA                    |
| LU-1991 | 2 | 61112324  | 61112324  | A | G | A | R    | exonic     | PEX13    | missense | NM_002618:p.Q120R     |
| LU-1991 | 2 | 61173292  | 61173292  | C | T | C | Y    | intronic   | KIAA1841 | NA       | NA                    |
| LU-1991 | 2 | 61501461  | 61501461  | C | G | C | S    | exonic     | USP34    | missense | NM_014709:p.E19Q      |
| LU-1991 | 2 | 63136647  | 63136647  | G | A | G | R    | exonic     | OTX1     | missense | NM_014562:p.A253T     |
| LU-1991 | 2 | 68219425  | 68219425  | C | G | C | S    | exonic     | WDR92    | missense | NM_138458:p.D196H     |
| LU-1991 | 2 | 70893272  | 70893272  | G | T | G | K    | intronic   | CLEC4F   | NA       | NA                    |
| LU-1991 | 2 | 74302055  | 74302055  | C | T | C | Y    | intronic   | SLC4A5   | NA       | NA                    |
| LU-1991 | 2 | 74687745  | 74687745  | C | G | C | S    | exonic     | C2orf65  | missense | NM_138804:p.K180N     |
| LU-1991 | 2 | 78722976  | 78722976  | C | A | C | M    | intergenic | NA       | NA       | NA                    |
| LU-1991 | 2 | 78722977  | 78722977  | C | A | C | M    | intergenic | NA       | NA       | NA                    |
| LU-1991 | 2 | 81277572  | 81277572  | G | T | G | K    | intergenic | NA       | NA       | NA                    |
| LU-1991 | 2 | 85621816  | 85621816  | C | T | C | Y    | intronic   | MAT2A    | NA       | NA                    |
| LU-1991 | 2 | 88609945  | 88609945  | C | T | C | Y    | exonic     | C2orf51  | silent   | NM_152670:p.L127L     |
| LU-1991 | 2 | 90969460  | 90969460  | C | T | C | Y    | intergenic | NA       | NA       | NA                    |
| LU-1991 | 2 | 104754592 | 104754592 | C | A | C | M    | intergenic | NA       | NA       | NA                    |
| LU-1991 | 2 | 105224759 | 105224759 | C | A | C | M    | exonic     | GPR45    | missense | NM_007227:p.N4K       |
| LU-1991 | 2 | 105346156 | 105346156 | G | T | G | K    | intronic   | FHL2     | NA       | NA                    |
| LU-1991 | 2 | 106352806 | 106352806 | G | C | G | S    | intergenic | NA       | NA       | NA                    |
| LU-1991 | 2 | 112305514 | 112305514 | C | T | C | Y    | intronic   | ANAPC1   | NA       | NA                    |
| LU-1991 | 2 | 112977039 | 112977039 | C | T | C | Y    | exonic     | TTL      | missense | NM_153712:p.H229Y     |
| LU-1991 | 2 | 113133798 | 113133798 | G | A | G | R    | exonic     | SLC20A1  | missense | NM_005415:p.G532D     |
| LU-1991 | 2 | 116227309 | 116227309 | C | A | C | M    | exonic     | DPP10    | missense | NM_001004360:p.T340K  |
| LU-1991 | 2 | 116288975 | 116288975 | C | A | C | M    | exonic     | DPP10    | missense | NM_001004360:p.Q606K  |
| LU-1991 | 2 | 118299371 | 118299371 | G | T | G | K    | intronic   | DDX18    | NA       | NA                    |
| LU-1991 | 2 | 120079309 | 120079309 | C | T | C | Y    | exonic     | PCDP1    | silent   | NM_001029996:p.H83H   |
| LU-1991 | 2 | 121460470 | 121460470 | C | T | C | Y    | exonic     | GLI2     | silent   | NM_005270:p.P701K     |
| LU-1991 | 2 | 136184151 | 136184151 | A | T | A | W    | exonic     | R3HDM1   | silent   | NM_015361:p.V837V     |
| LU-1991 | 2 | 141341548 | 141341548 | G | - | A | */-G | intronic   | LRP1B    | NA       | NA                    |
| LU-1991 | 2 | 161613532 | 161613532 | C | T | C | Y    | intergenic | NA       | NA       | NA                    |
| LU-1991 | 2 | 162067755 | 162067755 | G | T | G | K    | intergenic | NA       | NA       | NA                    |
| LU-1991 | 2 | 162447186 | 162447186 | C | A | C | M    | exonic     | SLC4A10  | missense | NM_022058:p.L364I     |
| LU-1991 | 2 | 162759402 | 162759402 | C | T | C | Y    | intronic   | FAP      | NA       | NA                    |
| LU-1991 | 2 | 162767918 | 162767918 | G | T | G | K    | intronic   | FAP      | NA       | NA                    |
| LU-1991 | 2 | 163000262 | 163000262 | G | T | G | K    | exonic     | KCNH7    | missense | NM_033272:p.A549D     |
| LU-1991 | 2 | 165729250 | 165729250 | A | T | A | W    | exonic     | SCN3A    | missense | NM_001081676:p.F167Y  |
| LU-1991 | 2 | 167815498 | 167815498 | G | T | G | K    | exonic     | XIRP2    | missense | NM_152381:p.R3117L    |
| LU-1991 | 2 | 172358479 | 172358479 | C | A | C | M    | exonic     | SLC25A12 | silent   | NM_003705:p.V450V     |
| LU-1991 | 2 | 174004534 | 174004534 | T | A | T | W    | intergenic | NA       | NA       | NA                    |
| LU-1991 | 2 | 178242616 | 178242616 | G | A | G | R    | intronic   | PDE11A   | NA       | NA                    |
| LU-1991 | 2 | 185511592 | 185511592 | C | A | C | M    | exonic     | ZNF804A  | missense | NM_194250:p.P1075Q    |
| LU-1991 | 2 | 188057205 | 188057205 | C | A | C | M    | intronic   | TFPI     | NA       | NA                    |
| LU-1991 | 2 | 190136556 | 190136556 | G | T | G | K    | splicing   | SLC40A1  | silent   | NM_014585:p.I467I     |
| LU-1991 | 2 | 191989110 | 191989110 | G | C | G | S    | exonic     | MYO1B    | missense | NM_001161819:p.D1062H |
| LU-1991 | 2 | 206983819 | 206983819 | G | T | G | K    | intergenic | NA       | NA       | NA                    |
| LU-1991 | 2 | 208197280 | 208197280 | G | A | G | R    | exonic     | FAM119A  | missense | NM_001127395:p.A22V   |
| LU-1991 | 2 | 209646780 | 209646780 | C | T | C | Y    | intergenic | NA       | NA       | NA                    |
| LU-1991 | 2 | 210350255 | 210350255 | G | T | G | K    | exonic     | UNC80    | missense | NM_182587:p.E109D     |
| LU-1991 | 2 | 228594762 | 228594762 | G | T | G | K    | exonic     | SPHKAP   | missense | NM_001142644:p.D202E  |
| LU-1991 | 2 | 230632291 | 230632291 | T | A | T | W    | exonic     | SLC16A14 | missense | NM_152527:p.I8F       |
| LU-1991 | 2 | 233118618 | 233118618 | C | A | C | M    | exonic     | CHRN3    | missense | NM_005199:p.P501Q     |
| LU-1991 | 2 | 234581397 | 234581397 | C | A | C | M    | intronic   | TRPM8    | NA       | NA                    |
| LU-1991 | 2 | 234581398 | 234581398 | C | A | C | M    | intronic   | TRPM8    | NA       | NA                    |
| LU-1991 | 2 | 237930762 | 237930762 | C | G | C | S    | exonic     | COL6A3   | silent   | NM_057166:p.G1576G    |
| LU-1991 | 3 | 3055597   | 3055597   | T | - | G | */-T | intronic   | CNTN4    | NA       | NA                    |
| LU-1991 | 3 | 15894685  | 15894685  | A | G | A | R    | intergenic | NA       | NA       | NA                    |
| LU-1991 | 3 | 16613405  | 16613405  | T | C | T | Y    | intronic   | DAZL     | NA       | NA                    |
| LU-1991 | 3 | 25767600  | 25767600  | C | A | C | M    | exonic     | NGLY1    | missense | NM_001145295:p.L217F  |
| LU-1991 | 3 | 38112387  | 38112387  | G | A | G | R    | exonic     | DLEC1    | missense | NM_007335:p.R706K     |
| LU-1991 | 3 | 38238145  | 38238145  | G | T | G | K    | exonic     | OXSR1    | missense | NM_005109:p.G188V     |
| LU-1991 | 3 | 39203099  | 39203099  | G | T | G | K    | exonic     | XIRP1    | missense | NM_001198621:p.P948T  |
| LU-1991 | 3 | 39351774  | 39351774  | C | A | C | M    | intergenic | NA       | NA       | NA                    |
| LU-1991 | 3 | 43364226  | 43364226  | G | A | G | R    | exonic     | SNRK     | missense | NM_017719:p.E491K     |
| LU-1991 | 3 | 43571774  | 43571774  | C | A | C | M    | splicing   | ANO10    | missense | NM_018075:p.Q556H     |
| LU-1991 | 3 | 48483609  | 48483609  | C | T | C | Y    | exonic     | TREX1    | missense | NM_016381:p.T239I     |
| LU-1991 | 3 | 69211988  | 69211988  | C | A | C | M    | exonic     | UBA3     | missense | NM_003968:p.K9N       |
| LU-1991 | 3 | 99399586  | 99399586  | C | T | C | Y    | intergenic | NA       | NA       | NA                    |
| LU-1991 | 3 | 109657390 | 109657390 | G | T | G | K    | exonic     | MYH15    | nonsense | NM_014981:p.C735X     |
| LU-1991 | 3 | 117054125 | 117054125 | G | C | G | S    | exonic     | LSAMP    | missense | NM_002338:p.L182V     |

|         |   |           |           |   |   |   |   |            |            |          |                      |
|---------|---|-----------|-----------|---|---|---|---|------------|------------|----------|----------------------|
| LU-1991 | 3 | 121013204 | 121013204 | C | T | C | Y | exonic     | NR1I2      | silent   | NM_033013:p.L154L    |
| LU-1991 | 3 | 122673748 | 122673748 | C | A | C | M | intronic   | POLQ       | NA       | NA                   |
| LU-1991 | 3 | 123741932 | 123741932 | C | G | C | S | intronic   | PARP9      | NA       | NA                   |
| LU-1991 | 3 | 130526893 | 130526893 | A | G | A | R | downstream | C3orf47    | NA       | NA                   |
| LU-1991 | 3 | 133589970 | 133589970 | T | C | T | Y | intergenic | NA         | NA       | NA                   |
| LU-1991 | 3 | 141605301 | 141605301 | C | G | C | S | exonic     | CLSTN2     | missense | NM_022131:p.Q125E    |
| LU-1991 | 3 | 144705506 | 144705506 | C | A | C | M | intronic   | SLC9A9     | NA       | NA                   |
| LU-1991 | 3 | 155224746 | 155224746 | T | A | T | W | downstream | LOC1005075 | NA       | NA                   |
| LU-1991 | 3 | 157245007 | 157245007 | C | G | C | S | intergenic | NA         | NA       | NA                   |
| LU-1991 | 3 | 167031445 | 167031445 | C | T | C | Y | exonic     | BCHE       | missense | NM_000055:p.G24E     |
| LU-1991 | 3 | 181973588 | 181973588 | C | T | C | Y | intergenic | NA         | NA       | NA                   |
| LU-1991 | 3 | 184924863 | 184924863 | T | G | T | K | intronic   | YEATS2     | NA       | NA                   |
| LU-1991 | 3 | 185523013 | 185523013 | T | G | T | K | intronic   | EIF4G1     | NA       | NA                   |
| LU-1991 | 3 | 186735374 | 186735374 | G | C | G | S | exonic     | LIPH       | missense | NM_139248:p.S97C     |
| LU-1991 | 3 | 187961797 | 187961797 | C | A | C | M | intergenic | NA         | NA       | NA                   |
| LU-1991 | 3 | 188571645 | 188571645 | A | G | A | R | exonic     | RTP4       | silent   | NM_022147:p.L177L    |
| LU-1991 | 3 | 198198788 | 198198788 | C | T | C | Y | intergenic | NA         | NA       | NA                   |
| LU-1991 | 4 | 2067351   | 2067351   | C | A | C | M | intronic   | POLN       | NA       | NA                   |
| LU-1991 | 4 | 2099666   | 2099666   | C | A | C | M | exonic     | POLN       | missense | NM_181808:p.D652Y    |
| LU-1991 | 4 | 6134442   | 6134442   | C | G | C | S | intronic   | JAKMIP1    | NA       | NA                   |
| LU-1991 | 4 | 9307476   | 9307476   | G | A | G | R | intergenic | NA         | NA       | NA                   |
| LU-1991 | 4 | 12947400  | 12947400  | A | G | A | R | ncRNA      | HSP90AB2P  | NA       | NA                   |
| LU-1991 | 4 | 20102491  | 20102491  | C | A | C | M | exonic     | SLIT2      | nonsense | NM_004787:p.S262X    |
| LU-1991 | 4 | 26633566  | 26633566  | A | T | A | W | exonic     | STIM2      | silent   | NM_001169118:p.S705S |
| LU-1991 | 4 | 30332274  | 30332274  | C | A | C | M | exonic     | PCDH7      | silent   | NM_001173523:p.A44A  |
| LU-1991 | 4 | 40045622  | 40045622  | C | T | C | Y | intronic   | CHRNA9     | NA       | NA                   |
| LU-1991 | 4 | 42245714  | 42245714  | T | A | T | W | ncRNA      | MIR548M    | NA       | NA                   |
| LU-1991 | 4 | 42717246  | 42717246  | C | G | C | S | intronic   | GRXCR1     | NA       | NA                   |
| LU-1991 | 4 | 47807369  | 47807369  | C | T | C | Y | exonic     | TXK        | missense | NM_003328:p.G130D    |
| LU-1991 | 4 | 48788919  | 48788919  | T | C | T | Y | intergenic | NA         | NA       | NA                   |
| LU-1991 | 4 | 48811957  | 48811957  | C | G | C | S | intergenic | NA         | NA       | NA                   |
| LU-1991 | 4 | 48816898  | 48816898  | T | C | T | Y | intergenic | NA         | NA       | NA                   |
| LU-1991 | 4 | 71235927  | 71235927  | C | G | C | S | exonic     | CABS1      | silent   | NM_033122:p.S194S    |
| LU-1991 | 4 | 71382154  | 71382154  | C | A | C | M | exonic     | MUC7       | missense | NM_001145007:p.N368K |
| LU-1991 | 4 | 77474207  | 77474207  | C | A | C | M | exonic     | CCDC158    | silent   | NM_001042784:p.L934L |
| LU-1991 | 4 | 82186664  | 82186664  | C | A | C | M | exonic     | BMP3       | silent   | NM_001201:p.T355T    |
| LU-1991 | 4 | 83566334  | 83566334  | A | T | A | W | ncRNA      | HNRPDL     | NA       | NA                   |
| LU-1991 | 4 | 99188976  | 99188976  | C | T | C | Y | intronic   | C4orf37    | NA       | NA                   |
| LU-1991 | 4 | 108344306 | 108344306 | C | T | C | Y | intergenic | NA         | NA       | NA                   |
| LU-1991 | 4 | 116011556 | 116011556 | C | A | C | M | splicing   | NDST4      | NA       | NA                   |
| LU-1991 | 4 | 126631264 | 126631264 | C | G | C | S | exonic     | FAT4       | missense | NM_024582:p.P4613A   |
| LU-1991 | 4 | 129262756 | 129262756 | G | T | G | K | exonic     | LARP1B     | missense | NM_178043:p.W496L    |
| LU-1991 | 4 | 129262757 | 129262757 | G | A | G | R | exonic     | LARP1B     | nonsense | NM_178043:p.W496X    |
| LU-1991 | 4 | 134330786 | 134330786 | T | A | T | W | UTR3       | PCDH10     | NA       | NA                   |
| LU-1991 | 4 | 142870498 | 142870498 | G | T | G | K | exonic     | IL15       | missense | NM_172174:p.V97F     |
| LU-1991 | 4 | 143545765 | 143545765 | A | C | A | M | intronic   | INPP4B     | NA       | NA                   |
| LU-1991 | 4 | 164658041 | 164658041 | C | A | C | M | exonic     | C4orf43    | missense | NM_018352:p.P132T    |
| LU-1991 | 4 | 189250134 | 189250134 | C | T | C | Y | intronic   | TRIML2     | NA       | NA                   |
| LU-1991 | 4 | 189897591 | 189897591 | G | T | G | K | intergenic | NA         | NA       | NA                   |
| LU-1991 | 5 | 893813    | 893813    | G | A | G | R | intronic   | ZDHHC11    | NA       | NA                   |
| LU-1991 | 5 | 6684976   | 6684976   | T | C | T | Y | intronic   | NSUN2      | NA       | NA                   |
| LU-1991 | 5 | 6806201   | 6806201   | G | T | G | K | intronic   | PAPD7      | NA       | NA                   |
| LU-1991 | 5 | 11399817  | 11399817  | C | A | C | M | intronic   | CTNND2     | NA       | NA                   |
| LU-1991 | 5 | 19519245  | 19519245  | C | A | C | M | exonic     | CDH18      | missense | NM_001167667:p.M565I |
| LU-1991 | 5 | 20340540  | 20340540  | C | G | C | S | intergenic | NA         | NA       | NA                   |
| LU-1991 | 5 | 28963122  | 28963122  | G | A | G | R | ncRNA      | LOC729862  | NA       | NA                   |
| LU-1991 | 5 | 33198366  | 33198366  | G | T | G | K | intergenic | NA         | NA       | NA                   |
| LU-1991 | 5 | 37213439  | 37213439  | G | T | G | K | intronic   | C5orf42    | NA       | NA                   |
| LU-1991 | 5 | 37388585  | 37388585  | G | C | G | S | intronic   | NUP155     | NA       | NA                   |
| LU-1991 | 5 | 43680261  | 43680261  | A | G | A | R | intronic   | NNT        | NA       | NA                   |
| LU-1991 | 5 | 54365322  | 54365322  | A | C | A | M | intronic   | GZMK       | NA       | NA                   |
| LU-1991 | 5 | 60223906  | 60223906  | T | C | T | Y | intronic   | ERCC8      | NA       | NA                   |
| LU-1991 | 5 | 63292603  | 63292603  | C | A | C | M | exonic     | HTR1A      | nonsense | NM_000524:p.E234X    |
| LU-1991 | 5 | 64557639  | 64557639  | C | T | C | Y | intronic   | ADAMTS6    | NA       | NA                   |
| LU-1991 | 5 | 75463346  | 75463346  | C | A | C | M | exonic     | SV2C       | nonsense | NM_014979:p.Y5X      |
| LU-1991 | 5 | 75708506  | 75708506  | C | A | C | M | intergenic | NA         | NA       | NA                   |
| LU-1991 | 5 | 76794685  | 76794685  | T | C | T | Y | exonic     | WDR41      | silent   | NM_018268:p.R113R    |
| LU-1991 | 5 | 79805463  | 79805463  | G | A | G | R | intronic   | ZFYVE16    | NA       | NA                   |
| LU-1991 | 5 | 107957521 | 107957521 | G | T | G | K | intergenic | NA         | NA       | NA                   |
| LU-1991 | 5 | 118374082 | 118374082 | C | A | C | M | intergenic | NA         | NA       | NA                   |
| LU-1991 | 5 | 127651017 | 127651017 | G | T | G | K | exonic     | FBN2       | silent   | NM_001999:p.I2254I   |
| LU-1991 | 5 | 140148263 | 140148263 | G | C | G | S | exonic     | PCDHA1     | missense | NM_018900:p.G735A    |
| LU-1991 | 5 | 140162269 | 140162269 | C | A | C | M | exonic     | PCDHA3     | missense | NM_018906:p.L435M    |
| LU-1991 | 5 | 140168310 | 140168310 | G | T | G | K | exonic     | PCDHA4     | missense | NM_018907:p.A452S    |
| LU-1991 | 5 | 140209654 | 140209654 | G | C | G | S | exonic     | PCDHA9     | missense | NM_031857:p.V464L    |
| LU-1991 | 5 | 147459074 | 147459074 | G | A | G | R | intronic   | SPINK5     | NA       | NA                   |
| LU-1991 | 5 | 161256708 | 161256708 | A | C | A | M | exonic     | GABRA1     | missense | NM_001127648:p.K358T |
| LU-1991 | 5 | 167912187 | 167912187 | C | A | C | M | intergenic | NA         | NA       | NA                   |
| LU-1991 | 5 | 170278394 | 170278394 | G | T | G | K | exonic     | RANBP17    | nonsense | NM_022897:p.G343X    |

|         |   |           |           |   |   |   |      |            |          |          |                       |
|---------|---|-----------|-----------|---|---|---|------|------------|----------|----------|-----------------------|
| LU-1991 | 5 | 176246670 | 176246670 | C | A | C | M    | exonic     | HK3      | missense | NM_002115:p.G599V     |
| LU-1991 | 6 | 6740593   | 6740593   | T | C | T | Y    | intergenic | NA       | NA       | NA                    |
| LU-1991 | 6 | 26024136  | 26024136  | G | T | G | K    | intronic   | SLC17A2  | NA       | NA                    |
| LU-1991 | 6 | 26216075  | 26216075  | C | T | C | Y    | exonic     | HIST1H1T | missense | NM_005323:p.D76N      |
| LU-1991 | 6 | 26519365  | 26519365  | G | C | G | S    | intronic   | BTN3A1   | NA       | NA                    |
| LU-1991 | 6 | 31583362  | 31583362  | C | T | C | Y    | intronic   | MICB     | NA       | NA                    |
| LU-1991 | 6 | 33397647  | 33397647  | C | G | C | S    | exonic     | DAXX     | missense | NM_001141969:p.D12H   |
| LU-1991 | 6 | 36212736  | 36212736  | C | G | C | S    | intronic   | MAPK13   | NA       | NA                    |
| LU-1991 | 6 | 38939692  | 38939692  | T | A | T | W    | exonic     | DNAH8    | missense | NM_001371:p.S1909T    |
| LU-1991 | 6 | 40068495  | 40068495  | G | T | G | K    | intergenic | NA       | NA       | NA                    |
| LU-1991 | 6 | 43254035  | 43254035  | G | T | G | K    | exonic     | SRF      | silent   | NM_003131:p.T396T     |
| LU-1991 | 6 | 50084745  | 50084745  | T | A | T | W    | downstream | DEFB110  | NA       | NA                    |
| LU-1991 | 6 | 50097578  | 50097578  | C | T | C | Y    | exonic     | DEFB110  | silent   | NM_001037497:p.L10L   |
| LU-1991 | 6 | 52764783  | 52764783  | A | C | A | M    | intronic   | GSTA1    | NA       | NA                    |
| LU-1991 | 6 | 53351585  | 53351585  | C | A | C | M    | intergenic | NA       | NA       | NA                    |
| LU-1991 | 6 | 55322870  | 55322870  | T | A | T | W    | exonic     | GFRAL    | missense | NM_207410:p.F113Y     |
| LU-1991 | 6 | 64474055  | 64474055  | C | T | C | Y    | exonic     | PHF3     | missense | NM_015153:p.T1182M    |
| LU-1991 | 6 | 80688276  | 80688276  | T | C | T | Y    | intronic   | ELOVL4   | NA       | NA                    |
| LU-1991 | 6 | 85503281  | 85503281  | C | G | C | S    | exonic     | TBX18    | missense | NM_001080508:p.L555F  |
| LU-1991 | 6 | 86054152  | 86054152  | C | - | T | */-C | intergenic | NA       | NA       | NA                    |
| LU-1991 | 6 | 105338881 | 105338881 | C | G | C | S    | intronic   | HACE1    | NA       | NA                    |
| LU-1991 | 6 | 116863903 | 116863903 | G | T | G | K    | exonic     | DSE      | missense | NM_001080976:p.A527S  |
| LU-1991 | 6 | 127649791 | 127649791 | T | G | T | K    | exonic     | RNF146   | missense | NM_030963:p.W113G     |
| LU-1991 | 6 | 127941611 | 127941611 | G | T | G | K    | splicing   | C6orf58  | NA       | NA                    |
| LU-1991 | 6 | 128072791 | 128072791 | T | C | T | Y    | UTR3       | THEMIS   | NA       | NA                    |
| LU-1991 | 6 | 131263970 | 131263970 | G | T | G | K    | exonic     | EPB41L2  | missense | NM_001199389:p.R325S  |
| LU-1991 | 6 | 134533210 | 134533210 | G | A | G | R    | exonic     | SGK1     | silent   | NM_001143676:p.P490P  |
| LU-1991 | 6 | 139306867 | 139306867 | T | A | T | W    | intronic   | REPS1    | NA       | NA                    |
| LU-1991 | 6 | 152824385 | 152824385 | G | T | G | K    | intronic   | SYNE1    | NA       | NA                    |
| LU-1991 | 6 | 160033761 | 160033761 | G | T | G | K    | exonic     | SOD2     | missense | NM_000636:p.H50N      |
| LU-1991 | 6 | 160388381 | 160388381 | G | A | G | R    | intronic   | IGF2R    | NA       | NA                    |
| LU-1991 | 6 | 169367253 | 169367253 | G | C | G | S    | exonic     | THBS2    | silent   | NM_003247:p.A895A     |
| LU-1991 | 7 | 6764010   | 6764010   | A | G | A | R    | intergenic | NA       | NA       | NA                    |
| LU-1991 | 7 | 20664717  | 20664717  | G | A | G | R    | exonic     | ABCB5    | missense | NM_001163993:p.A89T   |
| LU-1991 | 7 | 27839084  | 27839084  | G | C | G | S    | exonic     | JAZF1    | missense | NM_175061:p.H198D     |
| LU-1991 | 7 | 29098722  | 29098722  | G | A | G | R    | intronic   | CPVL     | NA       | NA                    |
| LU-1991 | 7 | 29932598  | 29932598  | C | T | C | Y    | exonic     | SCRN1    | missense | NM_001145514:p.D381N  |
| LU-1991 | 7 | 30055337  | 30055337  | G | T | G | K    | intronic   | PLEKHA8  | NA       | NA                    |
| LU-1991 | 7 | 35175424  | 35175424  | C | A | C | M    | intergenic | NA       | NA       | NA                    |
| LU-1991 | 7 | 36287257  | 36287257  | G | A | G | R    | exonic     | EEPDI1   | silent   | NM_030636:p.T313T     |
| LU-1991 | 7 | 37123313  | 37123313  | G | C | G | S    | intronic   | ELMO1    | NA       | NA                    |
| LU-1991 | 7 | 37139404  | 37139404  | G | T | G | K    | intronic   | ELMO1    | NA       | NA                    |
| LU-1991 | 7 | 47861271  | 47861271  | T | G | T | K    | intronic   | PKD1L1   | NA       | NA                    |
| LU-1991 | 7 | 47935262  | 47935262  | C | T | C | Y    | intronic   | PKD1L1   | NA       | NA                    |
| LU-1991 | 7 | 53038596  | 53038596  | A | G | A | R    | intergenic | NA       | NA       | NA                    |
| LU-1991 | 7 | 61483015  | 61483015  | G | A | G | R    | intergenic | NA       | NA       | NA                    |
| LU-1991 | 7 | 65133994  | 65133994  | C | A | C | M    | intergenic | NA       | NA       | NA                    |
| LU-1991 | 7 | 65741693  | 65741693  | C | T | C | Y    | UTR3       | KCTD7    | NA       | NA                    |
| LU-1991 | 7 | 75059403  | 75059403  | G | A | G | R    | intronic   | HIP1     | NA       | NA                    |
| LU-1991 | 7 | 84451736  | 84451736  | G | T | G | K    | intergenic | NA       | NA       | NA                    |
| LU-1991 | 7 | 87355230  | 87355230  | A | T | A | W    | intronic   | DBF4     | NA       | NA                    |
| LU-1991 | 7 | 98996111  | 98996111  | G | T | G | K    | UTR5       | ZNF655   | NA       | NA                    |
| LU-1991 | 7 | 99634935  | 99634935  | C | G | C | S    | intronic   | STAG3    | NA       | NA                    |
| LU-1991 | 7 | 100119673 | 100119673 | C | G | C | S    | exonic     | GIGYF1   | missense | NM_022574:p.G592R     |
| LU-1991 | 7 | 100479308 | 100479308 | G | T | G | K    | intronic   | MUC17    | NA       | NA                    |
| LU-1991 | 7 | 102994403 | 102994403 | C | T | C | Y    | exonic     | RELN     | nonsense | NM_005045:p.W1543X    |
| LU-1991 | 7 | 103596153 | 103596153 | A | T | A | W    | exonic     | ORC5     | missense | NM_181747:p.L294N     |
| LU-1991 | 7 | 106311891 | 106311891 | C | - | A | */-C | exonic     | PIK3CG   | FS_del   | NM_002649:p.T939fs    |
| LU-1991 | 7 | 107451916 | 107451916 | T | A | T | W    | intronic   | LAMB4    | NA       | NA                    |
| LU-1991 | 7 | 111914398 | 111914398 | G | A | G | R    | intronic   | C7orf53  | NA       | NA                    |
| LU-1991 | 7 | 117667183 | 117667183 | G | T | G | K    | intronic   | ANKRD7   | NA       | NA                    |
| LU-1991 | 7 | 118378359 | 118378359 | G | A | G | R    | intergenic | NA       | NA       | NA                    |
| LU-1991 | 7 | 128043189 | 128043189 | A | G | A | R    | intergenic | NA       | NA       | NA                    |
| LU-1991 | 7 | 128283850 | 128283850 | C | G | C | S    | exonic     | FLNC     | missense | NM_001127487:p.Q2399E |
| LU-1991 | 7 | 132641212 | 132641212 | G | C | G | S    | exonic     | EXOC4    | silent   | NM_021807:p.V171V     |
| LU-1991 | 7 | 142335346 | 142335346 | G | C | G | S    | exonic     | TRPV5    | missense | NM_019841:p.L290V     |
| LU-1991 | 7 | 142720212 | 142720212 | A | T | A | W    | intergenic | NA       | NA       | NA                    |
| LU-1991 | 7 | 146495420 | 146495420 | A | T | A | W    | intronic   | CNTNAP2  | NA       | NA                    |
| LU-1991 | 8 | 403021    | 403021    | G | C | G | S    | exonic     | FBXO25   | missense | NM_183421:p.L286F     |
| LU-1991 | 8 | 14211473  | 14211473  | A | G | A | R    | intronic   | SGCZ     | NA       | NA                    |
| LU-1991 | 8 | 15525059  | 15525059  | C | A | C | M    | exonic     | TUSC3    | missense | NM_178234:p.P80T      |
| LU-1991 | 8 | 15525160  | 15525160  | C | A | C | M    | intronic   | TUSC3    | NA       | NA                    |
| LU-1991 | 8 | 21982753  | 21982753  | C | G | C | S    | intronic   | EPB49    | NA       | NA                    |
| LU-1991 | 8 | 22482596  | 22482596  | C | T | C | Y    | intronic   | SORBS3   | NA       | NA                    |
| LU-1991 | 8 | 23768012  | 23768012  | T | G | T | K    | UTR5       | STC1     | NA       | NA                    |
| LU-1991 | 8 | 27522531  | 27522531  | A | T | A | W    | intronic   | CLU      | NA       | NA                    |
| LU-1991 | 8 | 47902172  | 47902172  | G | A | G | R    | intergenic | NA       | NA       | NA                    |
| LU-1991 | 8 | 61495080  | 61495080  | G | - | A | */-G | intergenic | NA       | NA       | NA                    |
| LU-1991 | 8 | 74352533  | 74352533  | T | C | T | Y    | intergenic | NA       | NA       | NA                    |

|         |    |           |           |   |   |   |   |            |          |          |                      |
|---------|----|-----------|-----------|---|---|---|---|------------|----------|----------|----------------------|
| LU-1991 | 8  | 82692938  | 82692938  | T | C | T | Y | intergenic | NA       | NA       | NA                   |
| LU-1991 | 8  | 91126325  | 91126325  | C | T | C | Y | exonic     | DECR1    | silent   | NM_001359:p.L271L    |
| LU-1991 | 8  | 95919812  | 95919812  | A | G | A | R | intronic   | INTS8    | NA       | NA                   |
| LU-1991 | 8  | 107297728 | 107297728 | C | T | C | Y | intergenic | NA       | NA       | NA                   |
| LU-1991 | 8  | 113387355 | 113387355 | C | A | C | M | intronic   | CSMD3    | NA       | NA                   |
| LU-1991 | 8  | 120700676 | 120700676 | T | C | T | Y | exonic     | ENPP2    | silent   | NM_006209:p.E156E    |
| LU-1991 | 8  | 125153072 | 125153072 | C | G | C | S | intronic   | FER1L6   | NA       | NA                   |
| LU-1991 | 8  | 125603505 | 125603505 | A | C | A | M | ncRNA      | TATDN1   | NA       | NA                   |
| LU-1991 | 8  | 141477097 | 141477097 | G | A | G | R | intronic   | TRAPPC9  | NA       | NA                   |
| LU-1991 | 8  | 143405249 | 143405249 | G | C | G | S | intronic   | TSNARE1  | NA       | NA                   |
| LU-1991 | 8  | 144872126 | 144872126 | C | T | C | Y | intronic   | MAPK15   | NA       | NA                   |
| LU-1991 | 9  | 15469564  | 15469564  | G | C | G | S | intronic   | PSIP1    | NA       | NA                   |
| LU-1991 | 9  | 18918405  | 18918405  | G | T | G | K | exonic     | FAM154A  | missense | NM_153707:p.P357H    |
| LU-1991 | 9  | 19775876  | 19775876  | C | T | C | Y | intronic   | SLC24A2  | NA       | NA                   |
| LU-1991 | 9  | 30790226  | 30790226  | G | T | G | K | intergenic | NA       | NA       | NA                   |
| LU-1991 | 9  | 66197087  | 66197087  | C | G | C | S | intergenic | NA       | NA       | NA                   |
| LU-1991 | 9  | 67905421  | 67905421  | G | A | G | R | intergenic | NA       | NA       | NA                   |
| LU-1991 | 9  | 68737687  | 68737687  | A | T | A | W | intergenic | NA       | NA       | NA                   |
| LU-1991 | 9  | 72341985  | 72341985  | G | T | G | K | exonic     | TRPM3    | silent   | NM_206945:p.A1125A   |
| LU-1991 | 9  | 85642294  | 85642294  | A | T | A | W | intronic   | KIF27    | NA       | NA                   |
| LU-1991 | 9  | 89448233  | 89448233  | T | C | T | Y | intronic   | DAPK1    | NA       | NA                   |
| LU-1991 | 9  | 89448234  | 89448234  | T | C | T | Y | intronic   | DAPK1    | NA       | NA                   |
| LU-1991 | 9  | 89935585  | 89935585  | C | G | C | S | exonic     | FAM75C2  | missense | NM_001166137:p.E729D |
| LU-1991 | 9  | 94689414  | 94689414  | G | T | G | K | intergenic | NA       | NA       | NA                   |
| LU-1991 | 9  | 96102064  | 96102064  | A | T | A | W | exonic     | ZNF169   | nonsense | NM_194320:p.R135X    |
| LU-1991 | 9  | 98837031  | 98837031  | C | A | C | M | intronic   | CTSL2    | NA       | NA                   |
| LU-1991 | 9  | 103211532 | 103211532 | G | A | G | R | exonic     | ZNF189   | missense | NM_003452:p.G554D    |
| LU-1991 | 9  | 107324696 | 107324696 | G | C | G | S | intronic   | FSD1L    | NA       | NA                   |
| LU-1991 | 9  | 115227554 | 115227554 | G | T | G | K | intronic   | C9orf43  | NA       | NA                   |
| LU-1991 | 9  | 124628624 | 124628624 | C | G | C | S | intronic   | PDCL     | NA       | NA                   |
| LU-1991 | 9  | 126285173 | 126285173 | T | A | T | W | intronic   | NR5A1    | NA       | NA                   |
| LU-1991 | 9  | 130792201 | 130792201 | G | A | G | R | intronic   | NUP188   | NA       | NA                   |
| LU-1991 | 9  | 134196522 | 134196522 | T | C | T | Y | exonic     | SETX     | missense | NM_015046:p.N325D    |
| LU-1991 | 9  | 135507975 | 135507975 | C | G | C | S | intronic   | DBH      | NA       | NA                   |
| LU-1991 | 9  | 137781716 | 137781716 | C | T | C | Y | intronic   | KCNT1    | NA       | NA                   |
| LU-1991 | 9  | 137811066 | 137811066 | C | A | C | M | exonic     | KCNT1    | missense | NM_020822:p.P924T    |
| LU-1991 | 9  | 137811067 | 137811067 | C | A | C | M | exonic     | KCNT1    | missense | NM_020822:p.P924H    |
| LU-1991 | 9  | 139007283 | 139007283 | G | T | G | K | intronic   | C9orf142 | NA       | NA                   |
| LU-1991 | 9  | 139261954 | 139261954 | G | C | G | S | exonic     | FAM166A  | missense | NM_001001710:p.P12R  |
| LU-1991 | 10 | 13291152  | 13291152  | C | T | C | Y | intronic   | MCM10    | NA       | NA                   |
| LU-1991 | 10 | 15160750  | 15160750  | C | A | C | M | exonic     | ACBD7    | nonsense | NM_001039844:p.G47X  |
| LU-1991 | 10 | 15726035  | 15726035  | C | T | C | Y | splicing   | ITGA8    | missense | NM_003638:p.D467N    |
| LU-1991 | 10 | 26599801  | 26599801  | G | C | G | S | intronic   | GAD2     | NA       | NA                   |
| LU-1991 | 10 | 27334457  | 27334457  | T | C | T | Y | UTR3       | ANKRD26  | NA       | NA                   |
| LU-1991 | 10 | 33514567  | 33514567  | C | T | C | Y | exonic     | NRP1     | missense | NM_003873:p.C809Y    |
| LU-1991 | 10 | 45515222  | 45515222  | C | G | C | S | intergenic | NA       | NA       | NA                   |
| LU-1991 | 10 | 49985924  | 49985924  | C | G | C | S | exonic     | C10orf72 | missense | NM_144984:p.V60L     |
| LU-1991 | 10 | 50542870  | 50542870  | G | T | G | K | exonic     | CHAT     | silent   | NM_020984:p.V555V    |
| LU-1991 | 10 | 50651244  | 50651244  | C | T | C | Y | intergenic | NA       | NA       | NA                   |
| LU-1991 | 10 | 52240802  | 52240802  | G | A | G | R | intronic   | A1CF     | NA       | NA                   |
| LU-1991 | 10 | 76405173  | 76405173  | A | T | A | W | exonic     | MYST4    | missense | NM_012330:p.S358C    |
| LU-1991 | 10 | 76460459  | 76460459  | G | T | G | K | exonic     | MYST4    | silent   | NM_012330:p.R1957R   |
| LU-1991 | 10 | 82172228  | 82172228  | G | A | G | R | exonic     | C10orf58 | missense | NM_032333:p.C85Y     |
| LU-1991 | 10 | 89458849  | 89458849  | G | A | G | R | intronic   | PAPSS2   | NA       | NA                   |
| LU-1991 | 10 | 96655834  | 96655834  | C | A | C | M | intergenic | NA       | NA       | NA                   |
| LU-1991 | 10 | 118296999 | 118296999 | C | A | C | M | intronic   | PNLIP    | NA       | NA                   |
| LU-1991 | 10 | 118499633 | 118499633 | C | A | C | M | intergenic | NA       | NA       | NA                   |
| LU-1991 | 10 | 121426442 | 121426442 | G | T | G | K | exonic     | BAG3     | silent   | NM_004281:p.L462L    |
| LU-1991 | 10 | 134849851 | 134849851 | T | A | T | W | exonic     | KNDC1    | missense | NM_152643:p.F337I    |
| LU-1991 | 11 | 488786    | 488786    | G | A | G | R | exonic     | RNH1     | silent   | NM_203384:p.P254P    |
| LU-1991 | 11 | 4660044   | 4660044   | C | G | C | S | exonic     | OR51E2   | silent   | NM_030774:p.L158L    |
| LU-1991 | 11 | 5818851   | 5818851   | G | T | G | K | exonic     | OR52E6   | missense | NM_001005167:p.P285T |
| LU-1991 | 11 | 8916121   | 8916121   | C | G | C | S | exonic     | ASCL3    | missense | NM_020646:p.R55P     |
| LU-1991 | 11 | 11115858  | 11115858  | G | C | G | S | intergenic | NA       | NA       | NA                   |
| LU-1991 | 11 | 11115893  | 11115893  | G | C | G | S | intergenic | NA       | NA       | NA                   |
| LU-1991 | 11 | 17504425  | 17504425  | G | T | G | K | intronic   | USH1C    | NA       | NA                   |
| LU-1991 | 11 | 18152036  | 18152036  | G | T | G | K | exonic     | MRGPRX4  | silent   | NM_054032:p.L219L    |
| LU-1991 | 11 | 18688923  | 18688923  | T | C | T | Y | exonic     | IGSF22   | silent   | NM_173588:p.Q809Q    |
| LU-1991 | 11 | 18849358  | 18849358  | T | C | T | Y | intergenic | NA       | NA       | NA                   |
| LU-1991 | 11 | 18912330  | 18912330  | C | A | C | M | exonic     | MRGPRX1  | missense | NM_147199:p.G193V    |
| LU-1991 | 11 | 27868147  | 27868147  | C | G | C | S | intergenic | NA       | NA       | NA                   |
| LU-1991 | 11 | 44597297  | 44597297  | G | A | G | R | UTR3       | CD82     | NA       | NA                   |
| LU-1991 | 11 | 49839197  | 49839197  | C | A | C | M | intergenic | NA       | NA       | NA                   |
| LU-1991 | 11 | 57597178  | 57597178  | T | C | T | Y | intronic   | OR9Q1    | NA       | NA                   |
| LU-1991 | 11 | 57727622  | 57727622  | G | C | G | S | exonic     | OR1S2    | nonsense | NM_001004459:p.S203X |
| LU-1991 | 11 | 57873378  | 57873378  | A | G | A | R | intergenic | NA       | NA       | NA                   |
| LU-1991 | 11 | 57926725  | 57926725  | G | C | G | S | exonic     | OR5B3    | missense | NM_001005469:p.A245G |
| LU-1991 | 11 | 58981426  | 58981426  | G | A | G | R | exonic     | OR4D6    | silent   | NM_001004708:p.E139E |
| LU-1991 | 11 | 60395024  | 60395024  | G | T | G | K | exonic     | ZP1      | missense | NM_207341:p.R282I    |



|         |    |           |           |   |   |   |      |            |          |          |                      |
|---------|----|-----------|-----------|---|---|---|------|------------|----------|----------|----------------------|
| LU-1991 | 11 | 61943089  | 61943089  | C | G | C | S    | UTR5       | SCGB1A1  | NA       | NA                   |
| LU-1991 | 11 | 64639558  | 64639558  | A | G | A | R    | exonic     | TM7SF2   | silent   | NM_003273:p.K336K    |
| LU-1991 | 11 | 65948171  | 65948171  | C | A | C | M    | exonic     | NPAS4    | missense | NM_178864:p.L412I    |
| LU-1991 | 11 | 68460620  | 68460620  | G | T | G | K    | exonic     | IGHMBP2  | missense | NM_002180:p.G699V    |
| LU-1991 | 11 | 75915394  | 75915394  | A | G | A | R    | intronic   | C11orf30 | NA       | NA                   |
| LU-1991 | 11 | 84841615  | 84841615  | G | T | G | K    | intronic   | DLG2     | NA       | NA                   |
| LU-1991 | 11 | 87940653  | 87940653  | C | A | C | M    | exonic     | GRM5     | nonsense | NM_000842:p.E616X    |
| LU-1991 | 11 | 87940654  | 87940654  | C | A | C | M    | exonic     | GRM5     | missense | NM_000842:p.R615S    |
| LU-1991 | 11 | 88551231  | 88551231  | G | T | G | K    | exonic     | TYR      | silent   | NM_000372:p.G154G    |
| LU-1991 | 11 | 104378160 | 104378160 | C | - | G | */-C | ncRNA      | CASP5    | NA       | NA                   |
| LU-1991 | 11 | 119197923 | 119197923 | T | C | T | Y    | intergenic | NA       | NA       | NA                   |
| LU-1991 | 11 | 124806530 | 124806530 | C | A | C | M    | UTR3       | PKNOX2   | NA       | NA                   |
| LU-1991 | 11 | 131904164 | 131904164 | C | A | C | M    | splicing   | OPCML    | NA       | NA                   |
| LU-1991 | 12 | 1810634   | 1810634   | G | T | G | K    | exonic     | LRTM2    | missense | NM_001163925:p.D114Y |
| LU-1991 | 12 | 4606164   | 4606164   | C | A | C | M    | exonic     | AKAP3    | missense | NM_006422:p.G722V    |
| LU-1991 | 12 | 21241412  | 21241412  | C | T | C | Y    | intronic   | SLCO1B1  | NA       | NA                   |
| LU-1991 | 12 | 37321120  | 37321120  | A | T | A | W    | intergenic | NA       | NA       | NA                   |
| LU-1991 | 12 | 38963996  | 38963996  | G | T | G | K    | exonic     | LRRK2    | missense | NM_198578:p.G765V    |
| LU-1991 | 12 | 38973634  | 38973634  | G | T | G | K    | exonic     | LRRK2    | missense | NM_198578:p.V904L    |
| LU-1991 | 12 | 38984189  | 38984189  | A | T | A | W    | exonic     | LRRK2    | missense | NM_198578:p.N1255Y   |
| LU-1991 | 12 | 40253811  | 40253811  | T | C | T | Y    | exonic     | PDZRN4   | missense | NM_013377:p.I730T    |
| LU-1991 | 12 | 42462517  | 42462517  | G | A | G | R    | exonic     | IRAK4    | missense | NM_001114182:p.R361H |
| LU-1991 | 12 | 51063841  | 51063841  | G | C | G | S    | exonic     | KRT84    | missense | NM_033045:p.F185L    |
| LU-1991 | 12 | 51106723  | 51106723  | C | T | C | Y    | intronic   | KRT75    | NA       | NA                   |
| LU-1991 | 12 | 54045416  | 54045416  | A | T | A | W    | exonic     | OR6C75   | silent   | NM_001005497:p.T85T  |
| LU-1991 | 12 | 55818415  | 55818415  | A | C | A | M    | intronic   | LRP1     | NA       | NA                   |
| LU-1991 | 12 | 65276830  | 65276830  | T | A | T | W    | intronic   | GRIP1    | NA       | NA                   |
| LU-1991 | 12 | 66658375  | 66658375  | C | A | C | M    | intergenic | NA       | NA       | NA                   |
| LU-1991 | 12 | 67386750  | 67386750  | G | C | G | S    | intronic   | NUP107   | NA       | NA                   |
| LU-1991 | 12 | 67411358  | 67411358  | T | - | A | */-T | intronic   | NUP107   | NA       | NA                   |
| LU-1991 | 12 | 67931302  | 67931302  | G | T | G | K    | exonic     | CPSF6    | missense | NM_007007:p.D63Y     |
| LU-1991 | 12 | 68042907  | 68042907  | G | - | T | */-G | exonic     | YEATS4   | FS_del   | NM_006530:p.G42fs    |
| LU-1991 | 12 | 75902244  | 75902244  | G | T | G | K    | intergenic | NA       | NA       | NA                   |
| LU-1991 | 12 | 75973987  | 75973987  | C | G | C | S    | exonic     | E2F7     | missense | NM_203394:p.E50Q     |
| LU-1991 | 12 | 92559144  | 92559144  | C | A | C | M    | intergenic | NA       | NA       | NA                   |
| LU-1991 | 12 | 94431758  | 94431758  | A | G | A | R    | exonic     | METAP2   | missense | NM_006838:p.I462V    |
| LU-1991 | 12 | 94790303  | 94790303  | C | T | C | Y    | exonic     | CCDC38   | missense | NM_182496:p.E449K    |
| LU-1991 | 12 | 99536303  | 99536303  | G | - | A | */-G | intronic   | GAS2L3   | NA       | NA                   |
| LU-1991 | 12 | 103991796 | 103991796 | C | A | C | M    | exonic     | ALDH1L2  | missense | NM_001034173:p.D56Y  |
| LU-1991 | 12 | 104043865 | 104043865 | G | A | G | R    | intronic   | KIAA1033 | NA       | NA                   |
| LU-1991 | 12 | 105917604 | 105917604 | G | A | G | R    | exonic     | CRY1     | missense | NM_004075:p.A331V    |
| LU-1991 | 12 | 113598707 | 113598707 | C | A | C | M    | intronic   | TBX3     | NA       | NA                   |
| LU-1991 | 12 | 117531140 | 117531140 | G | T | G | K    | intergenic | NA       | NA       | NA                   |
| LU-1991 | 12 | 119451285 | 119451285 | G | T | G | K    | exonic     | COQ5     | missense | NM_032314:p.R15S     |
| LU-1991 | 12 | 121329491 | 121329491 | C | G | C | S    | intronic   | CLIP1    | NA       | NA                   |
| LU-1991 | 12 | 122244906 | 122244906 | C | T | C | Y    | exonic     | MPHOSPH9 | missense | NM_022782:p.E589K    |
| LU-1991 | 12 | 129214226 | 129214226 | C | T | C | Y    | exonic     | FZD10    | silent   | NM_007197:p.P262P    |
| LU-1991 | 12 | 131120139 | 131120139 | G | C | G | S    | splicing   | EP400    | missense | NM_015409:p.Q3006H   |
| LU-1991 | 13 | 22719239  | 22719239  | A | T | A | W    | intronic   | SGCG     | NA       | NA                   |
| LU-1991 | 13 | 31666447  | 31666447  | A | G | A | R    | intronic   | FRY      | NA       | NA                   |
| LU-1991 | 13 | 41771905  | 41771905  | G | A | G | R    | exonic     | AKAP11   | missense | NM_016248:p.M341I    |
| LU-1991 | 13 | 44871252  | 44871252  | C | T | C | Y    | intronic   | SLC25A30 | NA       | NA                   |
| LU-1991 | 13 | 47791071  | 47791071  | A | T | A | W    | intronic   | RB1      | NA       | NA                   |
| LU-1991 | 13 | 58003070  | 58003070  | C | A | C | M    | intergenic | NA       | NA       | NA                   |
| LU-1991 | 13 | 89442925  | 89442925  | C | G | C | S    | intergenic | NA       | NA       | NA                   |
| LU-1991 | 13 | 96437448  | 96437448  | C | T | C | Y    | exonic     | OXGR1    | silent   | NM_080818:p.S189S    |
| LU-1991 | 13 | 100118796 | 100118796 | G | A | G | R    | intronic   | TMTC4    | NA       | NA                   |
| LU-1991 | 13 | 100118797 | 100118797 | G | A | G | R    | intronic   | TMTC4    | NA       | NA                   |
| LU-1991 | 13 | 100118798 | 100118798 | C | A | C | M    | intronic   | TMTC4    | NA       | NA                   |
| LU-1991 | 13 | 100849404 | 100849404 | C | T | C | Y    | exonic     | NALCN    | silent   | NM_052867:p.S25S     |
| LU-1991 | 13 | 109954443 | 109954443 | C | T | C | Y    | intronic   | COL4A2   | NA       | NA                   |
| LU-1991 | 13 | 112784792 | 112784792 | A | G | A | R    | exonic     | MCF2L    | silent   | NM_001112732:p.T699T |
| LU-1991 | 13 | 113609349 | 113609349 | A | G | A | R    | intronic   | FAM70B   | NA       | NA                   |
| LU-1991 | 14 | 18180251  | 18180251  | A | C | A | M    | intergenic | NA       | NA       | NA                   |
| LU-1991 | 14 | 18180263  | 18180263  | T | C | T | Y    | intergenic | NA       | NA       | NA                   |
| LU-1991 | 14 | 19155024  | 19155024  | G | T | G | K    | intergenic | NA       | NA       | NA                   |
| LU-1991 | 14 | 19833384  | 19833384  | G | A | G | R    | exonic     | TTC5     | missense | NM_138376:p.P329S    |
| LU-1991 | 14 | 22963239  | 22963239  | G | T | G | K    | intronic   | MYH7     | NA       | NA                   |
| LU-1991 | 14 | 30712334  | 30712334  | C | A | C | M    | exonic     | HECTD1   | missense | NM_015382:p.G312V    |
| LU-1991 | 14 | 34618153  | 34618153  | C | G | C | S    | intronic   | FAM177A1 | NA       | NA                   |
| LU-1991 | 14 | 36202355  | 36202355  | G | T | G | K    | exonic     | PAX9     | silent   | NM_006194:p.A169A    |
| LU-1991 | 14 | 38779622  | 38779622  | G | - | A | */-G | intronic   | MIA2     | NA       | NA                   |
| LU-1991 | 14 | 46459051  | 46459051  | G | A | G | R    | exonic     | MDGA2    | missense | NM_001113498:p.R718C |
| LU-1991 | 14 | 50294857  | 50294857  | T | G | T | K    | exonic     | NIN      | missense | NM_182946:p.K881Q    |
| LU-1991 | 14 | 52296167  | 52296167  | T | G | T | K    | exonic     | STYX     | missense | NM_001130701:p.V150G |
| LU-1991 | 14 | 59681495  | 59681495  | G | C | G | S    | intronic   | DHR57    | NA       | NA                   |
| LU-1991 | 14 | 62141885  | 62141885  | T | A | T | W    | intergenic | NA       | NA       | NA                   |
| LU-1991 | 14 | 69566916  | 69566916  | C | G | C | S    | UTR3       | SMOC1    | NA       | NA                   |
| LU-1991 | 14 | 70532403  | 70532403  | G | T | G | K    | intronic   | PCNX     | NA       | NA                   |

|         |    |           |           |   |    |   |       |            |            |          |                       |
|---------|----|-----------|-----------|---|----|---|-------|------------|------------|----------|-----------------------|
| LU-1991 | 14 | 72710088  | 72710088  | C | T  | C | Y     | exonic     | PSEN1      | silent   | NM_007318:p.L130L     |
| LU-1991 | 14 | 81452390  | 81452390  | G | T  | G | K     | intergenic | NA         | NA       | NA                    |
| LU-1991 | 14 | 88407608  | 88407608  | G | T  | G | K     | intronic   | TTC8       | NA       | NA                    |
| LU-1991 | 14 | 91045710  | 91045710  | G | A  | G | R     | exonic     | SMEK1      | missense | NM_032560:p.T12M      |
| LU-1991 | 14 | 92720047  | 92720047  | T | A  | T | W     | exonic     | MOAP1      | silent   | NM_022151:p.P98P      |
| LU-1991 | 14 | 94168246  | 94168246  | C | G  | C | S     | intergenic | NA         | NA       | NA                    |
| LU-1991 | 14 | 95841921  | 95841921  | A | T  | A | W     | intronic   | ATG2B      | NA       | NA                    |
| LU-1991 | 14 | 101586627 | 101586627 | G | T  | G | K     | exonic     | DYNC1H1    | missense | NM_001376:p.G4639C    |
| LU-1991 | 14 | 102671333 | 102671333 | G | T  | G | K     | exonic     | TNFAIP2    | silent   | NM_006291:p.L616L     |
| LU-1991 | 14 | 104680229 | 104680229 | C | A  | C | M     | exonic     | JAG2       | missense | NM_002226:p.D1189Y    |
| LU-1991 | 14 | 104928977 | 104928977 | G | T  | G | K     | intronic   | PACS2      | NA       | NA                    |
| LU-1991 | 15 | 19062517  | 19062517  | G | -  | T | *-/G  | intergenic | NA         | NA       | NA                    |
| LU-1991 | 15 | 21021330  | 21021330  | G | -  | T | *-/G  | intergenic | NA         | NA       | NA                    |
| LU-1991 | 15 | 23021579  | 23021579  | G | T  | G | K     | ncRNA      | SNORD115-2 | NA       | NA                    |
| LU-1991 | 15 | 23476497  | 23476497  | C | T  | C | Y     | exonic     | ATP10A     | missense | NM_024490:p.V1244M    |
| LU-1991 | 15 | 36021759  | 36021759  | G | T  | G | K     | intronic   | TMCOSA     | NA       | NA                    |
| LU-1991 | 15 | 39890448  | 39890448  | G | A  | G | R     | intronic   | MAPKBP1    | NA       | NA                    |
| LU-1991 | 15 | 40531226  | 40531226  | C | A  | C | M     | exonic     | ZFP106     | missense | NM_022473:p.G156V     |
| LU-1991 | 15 | 41571191  | 41571191  | A | T  | A | W     | exonic     | TP53BP1    | silent   | NM_001141980:p.I113I  |
| LU-1991 | 15 | 50396587  | 50396587  | C | A  | C | M     | exonic     | MYO5A      | missense | NM_001142495:p.D1735Y |
| LU-1991 | 15 | 53763422  | 53763422  | C | G  | C | S     | splicing   | PRTG       | NA       | NA                    |
| LU-1991 | 15 | 55518395  | 55518395  | T | A  | T | W     | exonic     | CGNL1      | silent   | NM_032866:p.T302T     |
| LU-1991 | 15 | 56931363  | 56931363  | A | C  | A | M     | exonic     | FAM63B     | missense | NM_001040450:p.K548N  |
| LU-1991 | 15 | 72361104  | 72361104  | C | G  | C | S     | intronic   | CCDC33     | NA       | NA                    |
| LU-1991 | 15 | 73438537  | 73438537  | G | A  | G | R     | exonic     | MAN2C1     | missense | NM_006715:p.S686F     |
| LU-1991 | 15 | 75260398  | 75260398  | T | C  | T | Y     | exonic     | PEAK1      | missense | NM_024776:p.Y309C     |
| LU-1991 | 15 | 76811364  | 76811364  | G | T  | G | K     | intergenic | NA         | NA       | NA                    |
| LU-1991 | 15 | 86224466  | 86224466  | C | T  | C | Y     | intronic   | NTRK3      | NA       | NA                    |
| LU-1991 | 15 | 99938804  | 99938804  | T | A  | T | W     | intergenic | NA         | NA       | NA                    |
| LU-1991 | 15 | 100041746 | 100041746 | C | T  | C | Y     | intronic   | TARSL2     | NA       | NA                    |
| LU-1991 | 16 | 2520476   | 2520476   | A | T  | A | W     | exonic     | AMDHD2     | silent   | NM_001145815:p.T500T  |
| LU-1991 | 16 | 4599718   | 4599718   | G | C  | G | S     | exonic     | FAM100A    | missense | NM_145253:p.P151A     |
| LU-1991 | 16 | 4775777   | 4775777   | C | T  | C | Y     | intronic   | 12-Sep     | NA       | NA                    |
| LU-1991 | 16 | 20379016  | 20379016  | A | T  | A | W     | exonic     | ACSM2A     | missense | NM_001010845:p.S27C   |
| LU-1991 | 16 | 20903846  | 20903846  | G | T  | G | K     | intronic   | DNAH3      | NA       | NA                    |
| LU-1991 | 16 | 21881438  | 21881438  | T | A  | T | W     | intronic   | UQCRC2     | NA       | NA                    |
| LU-1991 | 16 | 23602841  | 23602841  | A | T  | A | W     | exonic     | PLK1       | silent   | NM_005030:p.P322P     |
| LU-1991 | 16 | 30424275  | 30424275  | C | A  | C | M     | exonic     | ITGAL      | missense | NM_002209:p.S786Y     |
| LU-1991 | 16 | 33397459  | 33397459  | G | A  | G | R     | intergenic | NA         | NA       | NA                    |
| LU-1991 | 16 | 34640057  | 34640057  | C | A  | C | M     | intergenic | NA         | NA       | NA                    |
| LU-1991 | 16 | 45719710  | 45719710  | C | A  | C | M     | intronic   | NETO2      | NA       | NA                    |
| LU-1991 | 16 | 48114988  | 48114988  | G | T  | G | K     | intronic   | ZNF423     | NA       | NA                    |
| LU-1991 | 16 | 48675701  | 48675701  | A | C  | A | M     | exonic     | HEATR3     | missense | NM_182922:p.K430Q     |
| LU-1991 | 16 | 49733015  | 49733015  | C | T  | C | Y     | exonic     | SALL1      | missense | NM_002968:p.V207M     |
| LU-1991 | 16 | 52256505  | 52256505  | C | G  | C | S     | intronic   | RPGRIPL    | NA       | NA                    |
| LU-1991 | 16 | 53920038  | 53920038  | C | A  | C | M     | intronic   | IRX6       | NA       | NA                    |
| LU-1991 | 16 | 70330604  | 70330604  | C | A  | C | M     | intronic   | AP1G1      | NA       | NA                    |
| LU-1991 | 16 | 70699822  | 70699822  | G | T  | G | K     | intronic   | DHX38      | NA       | NA                    |
| LU-1991 | 16 | 73223888  | 73223888  | - | CC | G | *-/CC | intronic   | RFWD3      | NA       | NA                    |
| LU-1991 | 16 | 79652417  | 79652417  | A | T  | A | W     | exonic     | C16orf46   | silent   | NM_152337:p.S346S     |
| LU-1991 | 16 | 79772362  | 79772362  | G | C  | G | S     | exonic     | PKD1L2     | missense | NM_001076780:p.C671W  |
| LU-1991 | 16 | 80689448  | 80689448  | G | A  | G | R     | exonic     | HSD17B2    | missense | NM_002153:p.G357D     |
| LU-1991 | 16 | 82786039  | 82786039  | G | C  | G | S     | splicing   | ADAD2      | NA       | NA                    |
| LU-1991 | 16 | 83073763  | 83073763  | T | C  | T | Y     | exonic     | KIAA1609   | missense | NM_020947:p.H338R     |
| LU-1991 | 16 | 84239642  | 84239642  | C | T  | C | Y     | intronic   | KIAA0182   | NA       | NA                    |
| LU-1991 | 16 | 85117402  | 85117402  | A | T  | A | W     | intergenic | NA         | NA       | NA                    |
| LU-1991 | 16 | 85169937  | 85169937  | C | A  | C | M     | exonic     | FOXL1      | missense | NM_005250:p.A36D      |
| LU-1991 | 17 | 620008    | 620008    | C | A  | C | M     | intronic   | GLOD4      | NA       | NA                    |
| LU-1991 | 17 | 3142559   | 3142559   | G | T  | G | K     | exonic     | OR3A1      | missense | NM_002550:p.A23E      |
| LU-1991 | 17 | 3339226   | 3339226   | A | G  | A | R     | intronic   | ASPA       | NA       | NA                    |
| LU-1991 | 17 | 5194455   | 5194455   | G | T  | G | K     | intronic   | RABEP1     | NA       | NA                    |
| LU-1991 | 17 | 7519192   | 7519192   | T | G  | T | K     | exonic     | TP53       | missense | NM_001126117:p.T23P   |
| LU-1991 | 17 | 10103215  | 10103215  | G | T  | G | K     | intergenic | NA         | NA       | NA                    |
| LU-1991 | 17 | 10157324  | 10157324  | C | A  | C | M     | exonic     | MYH13      | nonsense | NM_003802:p.E1353X    |
| LU-1991 | 17 | 10256636  | 10256636  | G | T  | G | K     | intronic   | MYH8       | NA       | NA                    |
| LU-1991 | 17 | 16267804  | 16267804  | G | C  | G | S     | exonic     | TRPV2      | missense | NM_016113:p.E308Q     |
| LU-1991 | 17 | 16507163  | 16507163  | G | A  | G | R     | intergenic | NA         | NA       | NA                    |
| LU-1991 | 17 | 17639993  | 17639993  | G | T  | G | K     | exonic     | RAI1       | silent   | NM_030665:p.R1002R    |
| LU-1991 | 17 | 17963880  | 17963880  | G | T  | G | K     | exonic     | MYO15A     | silent   | NM_016239:p.A347A     |
| LU-1991 | 17 | 21491672  | 21491672  | G | T  | G | K     | intergenic | NA         | NA       | NA                    |
| LU-1991 | 17 | 23018978  | 23018978  | A | G  | A | R     | intergenic | NA         | NA       | NA                    |
| LU-1991 | 17 | 24207561  | 24207561  | C | A  | C | M     | intronic   | ERAL1      | NA       | NA                    |
| LU-1991 | 17 | 30850124  | 30850124  | C | T  | C | Y     | intergenic | NA         | NA       | NA                    |
| LU-1991 | 17 | 35285104  | 35285104  | A | G  | A | R     | exonic     | ZPBP2      | silent   | NM_198844:p.L238L     |
| LU-1991 | 17 | 35435875  | 35435875  | G | C  | G | S     | intronic   | MED24      | NA       | NA                    |
| LU-1991 | 17 | 35437772  | 35437772  | C | A  | C | M     | intronic   | MED24      | NA       | NA                    |
| LU-1991 | 17 | 35603286  | 35603286  | C | G  | C | S     | intronic   | RAPGEFL1   | NA       | NA                    |
| LU-1991 | 17 | 36928085  | 36928085  | C | G  | C | S     | intronic   | KRT15      | NA       | NA                    |
| LU-1991 | 17 | 37379520  | 37379520  | G | T  | G | K     | UTR3       | CNP        | NA       | NA                    |

|         |    |           |           |       |   |   |          |            |           |          |                           |
|---------|----|-----------|-----------|-------|---|---|----------|------------|-----------|----------|---------------------------|
| LU-1991 | 17 | 37510482  | 37510486  | AGACA | - | G | *-/AGACA | intronic   | DHX58     | NA       | NA                        |
| LU-1991 | 17 | 38090868  | 38090868  | G     | T | G | K        | exonic     | CNTNAP1   | nonsense | NM_003632:p.E207X         |
| LU-1991 | 17 | 38384953  | 38384953  | C     | A | C | M        | exonic     | AARSD1    | nonsense | NM_001136042:p.E96X       |
| LU-1991 | 17 | 40830016  | 40830016  | C     | A | C | M        | intronic   | ARHGAP27  | NA       | NA                        |
| LU-1991 | 17 | 46101831  | 46101831  | C     | T | C | Y        | exonic     | ABCC3     | silent   | NM_003786:p.A728A         |
| LU-1991 | 17 | 70754442  | 70754442  | T     | C | T | Y        | exonic     | GGA3      | missense | NM_138619:p.E24G          |
| LU-1991 | 18 | 324711    | 324711    | C     | A | C | M        | intronic   | COLEC12   | NA       | NA                        |
| LU-1991 | 18 | 570847    | 570847    | G     | A | G | R        | exonic     | CETN1     | missense | NM_004066:p.D147N         |
| LU-1991 | 18 | 6954803   | 6954803   | C     | G | C | S        | splicing   | LAMA1     | NA       | NA                        |
| LU-1991 | 18 | 12182459  | 12182459  | T     | G | T | K        | intergenic | NA        | NA       | NA                        |
| LU-1991 | 18 | 21058618  | 21058618  | G     | T | G | K        | exonic     | ZNF521    | missense | NM_015461:p.L1088M        |
| LU-1991 | 18 | 21061233  | 21061233  | G     | T | G | K        | exonic     | ZNF521    | missense | NM_015461:p.S216Y         |
| LU-1991 | 18 | 31171252  | 31171252  | A     | G | A | R        | exonic     | ZNF24     | missense | NM_006965:p.L350P         |
| LU-1991 | 18 | 39873400  | 39873400  | A     | G | A | R        | intergenic | NA        | NA       | NA                        |
| LU-1991 | 18 | 45583177  | 45583177  | C     | T | C | Y        | exonic     | ACAA2     | missense | NM_006111:p.G21R          |
| LU-1991 | 18 | 54986740  | 54986740  | C     | G | C | S        | intergenic | NA        | NA       | NA                        |
| LU-1991 | 18 | 65953409  | 65953409  | A     | G | A | R        | exonic     | RTTN      | missense | NM_173630:p.M959T         |
| LU-2349 | 1  | 16807784  | 16807784  | A     | G | A | R        | UTR5       | NBPF1     | NA       | NA                        |
| LU-2349 | 1  | 60000900  | 60000900  | G     | C | G | S        | UTR3       | FGGY      | NA       | NA                        |
| LU-2349 | 1  | 141477865 | 141477865 | G     | A | G | R        | intergenic | NA        | NA       | NA                        |
| LU-2349 | 1  | 147008447 | 147008447 | T     | G | T | K        | intronic   | NBPF16    | NA       | NA                        |
| LU-2349 | 1  | 158209534 | 158209534 | G     | A | G | R        | intergenic | NA        | NA       | NA                        |
| LU-2349 | 1  | 175100160 | 175100160 | G     | C | G | S        | exonic     | ASTN1     | missense | NM_004319:p.S1256R        |
| LU-2349 | 1  | 205202461 | 205202461 | G     | T | G | K        | exonic     | FCAMR     | silent   | NM_001122979:p.T124T      |
| LU-2349 | 1  | 226401251 | 226401251 | G     | T | G | K        | exonic     | GUK1      | silent   | NM_000858:p.L80L          |
| LU-2349 | 1  | 236120053 | 236120053 | G     | T | G | K        | exonic     | ZP4       | silent   | NM_021186:p.L74L          |
| LU-2349 | 1  | 238373050 | 238373050 | G     | C | G | S        | intronic   | FMN2      | NA       | NA                        |
| LU-2349 | 2  | 26308475  | 26308475  | A     | C | A | M        | intronic   | HADHA     | NA       | NA                        |
| LU-2349 | 2  | 33393721  | 33393721  | A     | G | A | R        | exonic     | LTBP1     | missense | NM_206943:p.N1204S        |
| LU-2349 | 2  | 81281679  | 81281679  | G     | A | G | R        | intergenic | NA        | NA       | NA                        |
| LU-2349 | 2  | 90961463  | 90961463  | A     | T | A | W        | intergenic | NA        | NA       | NA                        |
| LU-2349 | 2  | 90961476  | 90961476  | T     | A | T | W        | intergenic | NA        | NA       | NA                        |
| LU-2349 | 2  | 90968499  | 90968499  | C     | T | C | Y        | intergenic | NA        | NA       | NA                        |
| LU-2349 | 2  | 161845036 | 161845036 | T     | C | T | Y        | intergenic | NA        | NA       | NA                        |
| LU-2349 | 2  | 165860691 | 165860691 | A     | T | A | W        | exonic     | SCN2A     | nonsense | NM_021007:p.K38X          |
| LU-2349 | 2  | 170782102 | 170782102 | G     | T | G | K        | exonic     | MYO3B     | missense | NM_138995:p.R185L         |
| LU-2349 | 2  | 201711291 | 201711291 | C     | G | C | S        | intronic   | CFLAR     | NA       | NA                        |
| LU-2349 | 2  | 219597054 | 219597054 | G     | T | G | K        | exonic     | CCDC108   | missense | NM_194302:p.T841N         |
| LU-2349 | 3  | 42274716  | 42274716  | G     | C | G | S        | exonic     | CCK       | missense | NM_000729:p.R76G          |
| LU-2349 | 3  | 52521879  | 52521879  | T     | G | T | K        | intronic   | STAB1     | NA       | NA                        |
| LU-2349 | 3  | 126074970 | 126074970 | C     | A | C | M        | intronic   | ITGB5     | NA       | NA                        |
| LU-2349 | 3  | 126753667 | 126753667 | G     | A | G | R        | intronic   | OSBPL11   | NA       | NA                        |
| LU-2349 | 3  | 132356651 | 132356651 | G     | T | G | K        | exonic     | NEK11     | missense | NM_001146003:p.A320S      |
| LU-2349 | 3  | 135567919 | 135567919 | C     | T | C | Y        | exonic     | AMOTL2    | missense | NM_016201:p.S361N         |
| LU-2349 | 3  | 143986285 | 143986285 | G     | T | G | K        | exonic     | TRPC1     | missense | NM_003304:p.G303V         |
| LU-2349 | 3  | 187962002 | 187962002 | T     | C | T | Y        | intergenic | NA        | NA       | NA                        |
| LU-2349 | 4  | 117062296 | 117062296 | G     | T | G | K        | intergenic | NA        | NA       | NA                        |
| LU-2349 | 4  | 152288878 | 152288878 | C     | G | C | S        | intronic   | SH3D19    | NA       | NA                        |
| LU-2349 | 5  | 107939243 | 107939243 | C     | G | C | S        | intergenic | NA        | NA       | NA                        |
| LU-2349 | 5  | 126506393 | 126506393 | C     | G | C | S        | intergenic | NA        | NA       | NA                        |
| LU-2349 | 5  | 170327904 | 170327904 | A     | T | A | W        | exonic     | RANBP17   | missense | NM_022897:p.E543V         |
| LU-2349 | 6  | 56404818  | 56404818  | C     | A | C | M        | intergenic | NA        | NA       | NA                        |
| LU-2349 | 6  | 121618981 | 121618981 | T     | C | T | Y        | exonic     | C6orf170  | missense | NM_152730:p.Q628R         |
| LU-2349 | 7  | 4763228   | 4763228   | G     | C | G | S        | exonic     | FOXP1     | silent   | NM_001037165:p.G376G      |
| LU-2349 | 7  | 54787609  | 54787609  | T     | C | T | Y        | splicing   | SEC61G    | NA       | NA                        |
| LU-2349 | 7  | 56325937  | 56325937  | C     | A | C | M        | intergenic | NA        | NA       | NA                        |
| LU-2349 | 7  | 81552054  | 81552054  | C     | A | C | M        | exonic     | CACNA2D1  | missense | NM_000722:p.G209C         |
| LU-2349 | 7  | 97200001  | 97200001  | G     | C | G | S        | intronic   | TAC1      | NA       | NA                        |
| LU-2349 | 7  | 103079318 | 103079318 | C     | A | C | M        | intronic   | RELN      | NA       | NA                        |
| LU-2349 | 7  | 113305353 | 113305353 | T     | A | T | W        | exonic     | PPP1R3A   | silent   | NM_002711:p.P1010P        |
| LU-2349 | 7  | 122126241 | 122126241 | C     | A | C | M        | intronic   | CADPS2    | NA       | NA                        |
| LU-2349 | 7  | 124298227 | 124298227 | C     | T | C | Y        | exonic     | POT1      | missense | NM_015450:p.D77N          |
| LU-2349 | 7  | 128196486 | 128196486 | A     | C | A | M        | UTR3       | CALU      | NA       | NA                        |
| LU-2349 | 7  | 128202403 | 128202403 | G     | T | G | K        | exonic     | OPN15W    | missense | NM_001708:p.R132S         |
| LU-2349 | 7  | 128280272 | 128280272 | G     | - | A | *-/G     | exonic     | FLNC      | FS_del   | NM_001458:c.6159_6159delG |
| LU-2349 | 7  | 135597987 | 135597987 | T     | - | G | *-/T     | intergenic | NA        | NA       | NA                        |
| LU-2349 | 7  | 135597988 | 135597988 | T     | A | T | W        | intergenic | NA        | NA       | NA                        |
| LU-2349 | 8  | 47677496  | 47677496  | A     | T | A | W        | intergenic | NA        | NA       | NA                        |
| LU-2349 | 8  | 81375748  | 81375748  | C     | G | C | S        | intergenic | NA        | NA       | NA                        |
| LU-2349 | 9  | 6523330   | 6523330   | C     | T | C | Y        | intronic   | GLDC      | NA       | NA                        |
| LU-2349 | 9  | 67907281  | 67907281  | A     | G | A | R        | intergenic | NA        | NA       | NA                        |
| LU-2349 | 9  | 67919685  | 67919685  | A     | G | A | R        | ncRNA      | LOC642236 | NA       | NA                        |
| LU-2349 | 9  | 72566476  | 72566476  | A     | T | A | W        | intronic   | TRPM3     | NA       | NA                        |
| LU-2349 | 9  | 85883590  | 85883590  | T     | C | T | Y        | intergenic | NA        | NA       | NA                        |
| LU-2349 | 9  | 122676630 | 122676630 | C     | G | C | S        | intronic   | PHF19     | NA       | NA                        |
| LU-2349 | 9  | 127065809 | 127065809 | G     | C | G | S        | UTR5       | GAPVD1    | NA       | NA                        |
| LU-2349 | 9  | 130060622 | 130060622 | T     | G | T | K        | exonic     | GOLGA2    | missense | NM_004486:p.E714A         |
| LU-2349 | 10 | 38971032  | 38971032  | G     | T | G | K        | intergenic | NA        | NA       | NA                        |
| LU-2349 | 10 | 69618650  | 69618650  | C     | T | C | Y        | intronic   | MYPN      | NA       | NA                        |

|         |    |           |           |   |      |   |         |            |           |          |                      |
|---------|----|-----------|-----------|---|------|---|---------|------------|-----------|----------|----------------------|
| LU-2349 | 10 | 115364589 | 115364589 | T | A    | T | W       | splicing   | NRAP      | missense | NM_006175:p.D1027V   |
| LU-2349 | 10 | 127570728 | 127570728 | G | A    | G | R       | intergenic | NA        | NA       | NA                   |
| LU-2349 | 10 | 127833839 | 127833839 | C | G    | C | S       | exonic     | ADAM12    | missense | NM_021641:p.E96Q     |
| LU-2349 | 11 | 1575958   | 1575958   | G | T    | G | K       | exonic     | KRTAP5-2  | silent   | NM_001004325:p.S33S  |
| LU-2349 | 11 | 5227135   | 5227135   | G | C    | G | S       | intronic   | HBG1      | NA       | NA                   |
| LU-2349 | 11 | 65947914  | 65947914  | T | A    | T | W       | exonic     | NPAS4     | nonsense | NM_178864:p.L326X    |
| LU-2349 | 11 | 100504175 | 100504175 | C | T    | C | Y       | exonic     | PGR       | silent   | NM_000926:p.R279R    |
| LU-2349 | 11 | 100585423 | 100585423 | G | T    | G | K       | intergenic | NA        | NA       | NA                   |
| LU-2349 | 12 | 5024095   | 5024095   | G | C    | G | S       | exonic     | KCNA5     | missense | NM_002234:p.G174A    |
| LU-2349 | 12 | 7758995   | 7758995   | - | TGAA | G | */+TGAA | intronic   | DPPA3     | NA       | NA                   |
| LU-2349 | 12 | 20681330  | 20681330  | T | A    | T | W       | exonic     | PDE3A     | silent   | NM_000921:p.L677L    |
| LU-2349 | 12 | 27768287  | 27768287  | G | A    | G | R       | exonic     | MRPS35    | silent   | NM_001190864:p.E141E |
| LU-2349 | 12 | 42250018  | 42250018  | G | T    | G | K       | intergenic | NA        | NA       | NA                   |
| LU-2349 | 12 | 55261887  | 55261887  | G | T    | G | K       | exonic     | RBMS2     | missense | NM_002898:p.V246F    |
| LU-2349 | 12 | 77122921  | 77122921  | C | A    | C | M       | exonic     | NAV3      | missense | NM_014903:p.L2282M   |
| LU-2349 | 12 | 129214778 | 129214778 | C | A    | C | M       | exonic     | FZD10     | silent   | NM_007197:p.L446L    |
| LU-2349 | 13 | 19961478  | 19961478  | C | A    | C | M       | intronic   | CRYL1     | NA       | NA                   |
| LU-2349 | 13 | 24174260  | 24174260  | C | A    | C | M       | intronic   | ATP12A    | NA       | NA                   |
| LU-2349 | 13 | 90722219  | 90722219  | G | T    | G | K       | intergenic | NA        | NA       | NA                   |
| LU-2349 | 14 | 38755311  | 38755311  | G | T    | G | K       | intergenic | NA        | NA       | NA                   |
| LU-2349 | 14 | 43080341  | 43080341  | G | T    | G | K       | intergenic | NA        | NA       | NA                   |
| LU-2349 | 14 | 44400778  | 44400778  | T | A    | T | W       | intergenic | NA        | NA       | NA                   |
| LU-2349 | 14 | 46190581  | 46190581  | C | A    | C | M       | exonic     | RPL10L    | missense | NM_080746:p.G37C     |
| LU-2349 | 14 | 50546922  | 50546922  | C | G    | C | S       | exonic     | TRIM9     | missense | NM_015163:p.R361P    |
| LU-2349 | 14 | 65549475  | 65549475  | A | G    | A | R       | intergenic | NA        | NA       | NA                   |
| LU-2349 | 14 | 92552954  | 92552954  | C | -    | - | */-C    | intronic   | ITPK1     | NA       | NA                   |
| LU-2349 | 14 | 92552960  | 92552960  | T | A    | T | W       | intronic   | ITPK1     | NA       | NA                   |
| LU-2349 | 14 | 95227309  | 95227309  | C | A    | C | M       | intronic   | TCL1B     | NA       | NA                   |
| LU-2349 | 16 | 1246711   | 1246711   | G | T    | G | K       | intronic   | TPSD1     | NA       | NA                   |
| LU-2349 | 16 | 1246712   | 1246712   | G | T    | G | K       | intronic   | TPSD1     | NA       | NA                   |
| LU-2349 | 16 | 33864695  | 33864695  | T | C    | T | Y       | intergenic | NA        | NA       | NA                   |
| LU-2349 | 16 | 33866401  | 33866401  | C | A    | C | M       | intergenic | NA        | NA       | NA                   |
| LU-2349 | 16 | 56540768  | 56540768  | C | A    | C | M       | exonic     | CNGB1     | nonsense | NM_001297:p.E371X    |
| LU-2349 | 17 | 165375    | 165375    | A | C    | A | M       | intronic   | RPH3AL    | NA       | NA                   |
| LU-2349 | 17 | 165643    | 165643    | C | A    | C | M       | intronic   | RPH3AL    | NA       | NA                   |
| LU-2349 | 17 | 37030722  | 37030722  | C | T    | C | Y       | intronic   | KRT17     | NA       | NA                   |
| LU-2349 | 17 | 40202576  | 40202576  | C | G    | C | S       | intronic   | ADAM11    | NA       | NA                   |
| LU-2349 | 17 | 74984583  | 74984583  | G | C    | G | S       | UTR5       | RBFOX3    | NA       | NA                   |
| LU-2349 | 18 | 59317262  | 59317262  | A | G    | A | R       | intronic   | SERPIN5   | NA       | NA                   |
| LU-2349 | 19 | 17337411  | 17337411  | C | A    | C | M       | exonic     | PLVAP     | missense | NM_031310:p.R288L    |
| LU-2349 | 19 | 23807094  | 23807094  | A | G    | A | R       | intergenic | NA        | NA       | NA                   |
| LU-2349 | 19 | 56421026  | 56421026  | A | G    | A | R       | exonic     | CD33      | missense | NM_001082618:p.T65A  |
| LU-2349 | 20 | 801637    | 801637    | G | A    | G | R       | exonic     | ANGPT4    | missense | NM_015985:p.A493V    |
| LU-2349 | 20 | 2544813   | 2544813   | A | C    | A | M       | exonic     | TMC2      | missense | NM_080751:p.N635H    |
| LU-2349 | 20 | 6707411   | 6707411   | G | T    | G | K       | exonic     | BMP2      | missense | NM_001200:p.R289L    |
| LU-2349 | 20 | 22510581  | 22510581  | G | C    | G | S       | exonic     | FOXA2     | silent   | NM_153675:p.V427V    |
| LU-2349 | 20 | 28243553  | 28243553  | G | A    | G | R       | ncRNA      | FRG1B     | NA       | NA                   |
| LU-2349 | 20 | 28249877  | 28249877  | A | T    | A | W       | intergenic | NA        | NA       | NA                   |
| LU-2349 | 20 | 44070900  | 44070900  | G | T    | G | K       | upstream   | MMP9      | NA       | NA                   |
| LU-2349 | 20 | 62190453  | 62190453  | A | T    | A | W       | UTR5       | OPRL1     | NA       | NA                   |
| LU-2349 | 21 | 10153453  | 10153453  | C | G    | C | S       | intergenic | NA        | NA       | NA                   |
| LU-2349 | 22 | 35908638  | 35908638  | T | A    | T | W       | exonic     | C1QTNF6   | missense | NM_031910:p.S125C    |
| LU-2349 | X  | 17729704  | 17729704  | G | A    | G | R       | exonic     | RAI2      | silent   | NM_001172739:p.T116T |
| LU-2349 | X  | 26068000  | 26068000  | C | A    | C | M       | exonic     | MAGEB18   | missense | NM_173699:p.A326D    |
| LU-2349 | X  | 53287799  | 53287799  | G | T    | G | K       | exonic     | IQSEC2    | missense | NM_015075:p.H764Q    |
| LU-2349 | X  | 55531590  | 55531590  | G | T    | G | K       | exonic     | USP51     | missense | NM_201286:p.L170I    |
| LU-2349 | X  | 101045835 | 101045835 | C | A    | C | M       | intronic   | ZMAT1     | NA       | NA                   |
| LU-2349 | X  | 150874627 | 150874627 | A | C    | A | M       | exonic     | GABRE     | missense | NM_004961:p.Y336D    |
| Lu-2375 | 1  | 94259875  | 94259875  | C | A    | C | M       | intronic   | ABCA4     | NA       | NA                   |
| Lu-2375 | 1  | 141478735 | 141478735 | T | G    | T | K       | intergenic | NA        | NA       | NA                   |
| Lu-2375 | 1  | 141801674 | 141801674 | C | G    | C | S       | intergenic | NA        | NA       | NA                   |
| Lu-2375 | 1  | 141801680 | 141801680 | G | C    | G | S       | intergenic | NA        | NA       | NA                   |
| Lu-2375 | 1  | 195842932 | 195842932 | A | T    | A | W       | intronic   | DENND1B   | NA       | NA                   |
| Lu-2375 | 3  | 15895226  | 15895226  | T | A    | T | W       | intergenic | NA        | NA       | NA                   |
| Lu-2375 | 4  | 191053979 | 191053979 | G | A    | G | R       | intergenic | NA        | NA       | NA                   |
| Lu-2375 | 4  | 191131894 | 191131894 | G | A    | G | R       | intergenic | NA        | NA       | NA                   |
| Lu-2375 | 9  | 67908293  | 67908293  | A | G    | A | R       | intergenic | NA        | NA       | NA                   |
| Lu-2375 | 9  | 67908304  | 67908304  | G | A    | G | R       | intergenic | NA        | NA       | NA                   |
| Lu-2375 | 9  | 67909472  | 67909472  | T | G    | T | K       | intergenic | NA        | NA       | NA                   |
| Lu-2375 | 9  | 67917825  | 67917825  | G | C    | G | S       | ncRNA      | LOC642236 | NA       | NA                   |
| Lu-2375 | 10 | 41698306  | 41698306  | C | G    | C | S       | intergenic | NA        | NA       | NA                   |
| Lu-2375 | 11 | 408922    | 408922    | C | T    | C | Y       | exonic     | ANO9      | missense | NM_001012302:p.G668R |
| Lu-2375 | 12 | 118117202 | 118117202 | G | A    | G | R       | downstream | HSPB8     | NA       | NA                   |
| Lu-2375 | 15 | 39138062  | 39138062  | T | C    | T | Y       | intronic   | INO80     | NA       | NA                   |
| Lu-2375 | 20 | 28227698  | 28227698  | G | T    | G | K       | ncRNA      | FRG1B     | NA       | NA                   |
| Lu-2375 | 20 | 28248399  | 28248399  | G | C    | G | S       | downstream | FRG1B     | NA       | NA                   |
| Lu-2375 | 20 | 28267271  | 28267271  | G | A    | G | R       | intergenic | NA        | NA       | NA                   |
| Lu-2375 | 21 | 9819568   | 9819568   | G | T    | G | K       | intergenic | NA        | NA       | NA                   |
| Lu-2375 | Y  | 10594536  | 10594536  | G | C    | G | S       | intergenic | NA        | NA       | NA                   |

|         |    |           |           |      |   |   |         |            |        |          |                          |
|---------|----|-----------|-----------|------|---|---|---------|------------|--------|----------|--------------------------|
| Lu-2375 | Y  | 11771989  | 11771989  | G    | A | G | R       | intergenic | NA     | NA       | NA                       |
| Lu-2375 | Y  | 11784316  | 11784316  | T    | C | T | Y       | intergenic | NA     | NA       | NA                       |
| Lu-2375 | Y  | 11784322  | 11784322  | C    | A | C | M       | intergenic | NA     | NA       | NA                       |
| Lu-2375 | Y  | 11948915  | 11948915  | G    | A | G | R       | intergenic | NA     | NA       | NA                       |
| Lu-2375 | Y  | 57389767  | 57389767  | T    | C | T | Y       | intergenic | NA     | NA       | NA                       |
| Lu-2375 | M  | 10947     | 10947     | -    | C | A | */+C    | intergenic | NA     | NA       | NA                       |
| Lu-597  | 1  | 5655304   | 5655304   | G    | A | G | R       | intergenic | NA     | NA       | NA                       |
| Lu-597  | 1  | 141480098 | 141480098 | C    | G | C | S       | intergenic | NA     | NA       | NA                       |
| Lu-597  | 3  | 47136892  | 47136895  | CTCT | - | A | */-CTCT | exonic     | SETD2  | FS_del   | NM_014159:c.4235_4238del |
| Lu-597  | 4  | 48817765  | 48817765  | A    | G | A | R       | intergenic | NA     | NA       | NA                       |
| Lu-597  | 6  | 43856533  | 43856533  | G    | A | G | R       | exonic     | VEGFA  | missense | NM_001171623:p.R170H     |
| Lu-597  | 6  | 44452788  | 44452788  | G    | A | G | R       | UTR3       | SPATS1 | NA       | NA                       |
| Lu-597  | 9  | 67903406  | 67903406  | G    | A | G | R       | intergenic | NA     | NA       | NA                       |
| Lu-597  | 9  | 67906873  | 67906873  | T    | C | T | Y       | intergenic | NA     | NA       | NA                       |
| Lu-597  | 9  | 67911247  | 67911247  | G    | A | G | R       | intergenic | NA     | NA       | NA                       |
| Lu-597  | 9  | 67911250  | 67911250  | C    | G | C | S       | intergenic | NA     | NA       | NA                       |
| Lu-597  | 9  | 67911260  | 67911260  | A    | G | A | R       | intergenic | NA     | NA       | NA                       |
| Lu-597  | 9  | 67916157  | 67916157  | T    | C | T | Y       | intergenic | NA     | NA       | NA                       |
| Lu-597  | 10 | 41698597  | 41698597  | A    | T | A | W       | intergenic | NA     | NA       | NA                       |
| Lu-597  | 12 | 121946481 | 121946481 | G    | C | G | S       | exonic     | VPS37B | missense | NM_024667:p.L28V         |
| Lu-597  | 14 | 76171582  | 76171582  | A    | C | A | M       | intergenic | NA     | NA       | NA                       |
| Lu-597  | 14 | 76171583  | 76171583  | G    | A | G | R       | intergenic | NA     | NA       | NA                       |
| Lu-597  | 16 | 70650503  | 70650503  | T    | - | C | */-T    | intronic   | HP     | NA       | NA                       |
| Lu-597  | 17 | 21492456  | 21492456  | C    | T | C | Y       | intergenic | NA     | NA       | NA                       |
| Lu-597  | 20 | 28267202  | 28267202  | G    | A | G | R       | intergenic | NA     | NA       | NA                       |
| Lu-597  | 20 | 33776439  | 33776439  | A    | T | A | W       | exonic     | RBM39  | missense | NM_184234:p.C157S        |
| Lu-597  | 21 | 10093450  | 10093450  | C    | A | C | M       | intronic   | BAGE2  | NA       | NA                       |
| Lu-597  | Y  | 11930032  | 11930032  | C    | T | C | Y       | intergenic | NA     | NA       | NA                       |
| Lu-597  | Y  | 57439304  | 57439304  | C    | A | C | M       | intergenic | NA     | NA       | NA                       |

Supplementary Table 5. Somatic SNVs validated by the Sanger resequencing

| sample | chr | start     | end       | ref   | var | geno_N | geno_T | region   | gene       | function  | seq_change             |
|--------|-----|-----------|-----------|-------|-----|--------|--------|----------|------------|-----------|------------------------|
| 7285   | 1   | 184591427 | 184591427 | G     | C   | G      | S      | exonic   | TPR        | nonsense  | NM_003292:p.S662X      |
| 7285   | 1   | 213914947 | 213914947 | C     | A   | C      | M      | exonic   | USH2A      | missense  | NM_206933:p.S4310I     |
| 7285   | 1   | 246752295 | 246752295 | C     | A   | C      | M      | exonic   | OR2G6      | nonsense  | NM_001013355:p.S242X   |
| 7285   | 3   | 35745939  | 35745939  | C     | T   | C      | Y      | exonic   | ARPP21     | nonsense  | NM_016300:p.Q456X      |
| 7285   | 3   | 44907098  | 44907098  | G     | C   | G      | S      | splicing | TGM4       | NA        | NA                     |
| 7285   | 3   | 52833007  | 52833007  | G     | -   | C      | */-G   | exonic   | ITIH4      | FS_del    | NM_001166449:p.R409fs  |
| 7285   | 3   | 148603203 | 148603203 | A     | T   | A      | W      | splicing | ZIC4       | NA        | NA                     |
| 7285   | 4   | 102166197 | 102166197 | C     | A   | C      | M      | exonic   | PPP3CA     | nonsense  | NM_001130692:p.E420X   |
| 7285   | 6   | 69760513  | 69760513  | C     | A   | C      | M      | exonic   | BAI3       | missense  | NM_001704:p.L623M      |
| 7285   | 7   | 81552033  | 81552033  | G     | A   | G      | R      | exonic   | CACNA2D1   | nonsense  | NM_000722:p.R216X      |
| 7285   | 7   | 120752769 | 120752769 | T     | C   | T      | Y      | splicing | WNT16      | missense  | NM_016087:p.W22R       |
| 7285   | 7   | 128274177 | 128274177 | G     | A   | G      | R      | exonic   | FLNC       | missense  | NM_001127487:p.G1424R  |
| 7285   | 8   | 105525652 | 105525652 | C     | A   | C      | M      | splicing | DPYS       | missense  | NM_001385:p.G265W      |
| 7285   | 8   | 113336833 | 113336833 | C     | T   | C      | Y      | splicing | CSMD3      | NA        | NA                     |
| 7285   | 8   | 113747682 | 113747682 | C     | G   | C      | S      | splicing | CSMD3      | missense  | NM_052900:p.R835T      |
| 7285   | 9   | 27195004  | 27195025  | ATATT | -   | C      | */-    | exonic   | TEK        | FS_del    | NM_000459:p.769_776del |
|        |     |           |           | GCAAT |     |        |        |          | ATATTG     |           |                        |
|        |     |           |           | TGAAG |     |        |        |          | CAATTG     |           |                        |
|        |     |           |           | AGGGC |     |        |        |          | AAGAGG     |           |                        |
|        |     |           |           | AA    |     |        |        |          | GCAA       |           |                        |
| 7285   | 10  | 68196044  | 68196044  | G     | T   | G      | K      | exonic   | CTNNA3     | missense  | NM_001127384:p.T422N   |
| 7285   | 10  | 72170810  | 72170810  | G     | T   | G      | K      | exonic   | ADAMTS14   | nonsense  | NM_080722:p.E604X      |
| 7285   | 10  | 124047284 | 124047286 | TGA   | -   | G      | */-TGA | exonic   | BTBD16     | nonFS_del | NM_144587:p.201_202del |
| 7285   | 11  | 20472303  | 20472303  | G     | -   | C      | */-G   | exonic   | PRMT3      | FS_del    | NM_001145166:p.T409fs  |
| 7285   | 12  | 48787646  | 48787646  | T     | A   | T      | W      | exonic   | GPD1       | nonsense  | NM_005276:p.C214X      |
| 7285   | 12  | 94797563  | 94797563  | G     | A   | G      | R      | exonic   | CCDC38     | nonsense  | NM_182496:p.Q378X      |
| 7285   | 13  | 77090195  | 77090195  | C     | T   | C      | Y      | splicing | SCEL       | nonsense  | NM_003843:p.R523X      |
| 7285   | 14  | 93664020  | 93664020  | C     | -   | G      | */-C   | exonic   | IFI27L2    | FS_del    | NM_032036:p.A88fs      |
| 7285   | 15  | 26129882  | 26129882  | T     | A   | T      | W      | exonic   | HERC2      | missense  | NM_004667:p.Q2310H     |
| 7285   | 15  | 27154497  | 27154497  | G     | A   | G      | R      | splicing | APBA2      | NA        | NA                     |
| 7285   | 15  | 90774346  | 90774346  | G     | T   | G      | K      | splicing | ST8SIA2    | NA        | NA                     |
| 7285   | 16  | 3004012   | 3004012   | C     | A   | C      | M      | exonic   | CLDN9      | nonsense  | NM_020982:p.Y216X      |
| 7285   | 16  | 54994435  | 54994435  | T     | A   | T      | W      | exonic   | AMFR       | nonsense  | NM_001144:p.K313X      |
| 7285   | 17  | 7520443   | 7520443   | A     | -   | G      | */-A   | exonic   | TP53       | FS_del    | NM_001126113:p.L26fs   |
| 7285   | 17  | 8107152   | 8107152   | G     | T   | G      | K      | splicing | PFAS       | missense  | NM_012393:p.V471L      |
| 7285   | 20  | 13715997  | 13715997  | A     | T   | A      | W      | splicing | C20orf7    | nonsense  | NM_024120:p.R88X       |
| 7285   | 22  | 49411471  | 49411471  | A     | -   | G      | */-A   | exonic   | ARSA       | FS_del    | NM_001085427:p.F319fs  |
| 7285   | X   | 118855966 | 118855966 | C     | A   | C      | M      | exonic   | UPF3B      | nonsense  | NM_023010:p.E349X      |
| 7313   | 1   | 70224525  | 70224525  | T     | A   | T      | W      | exonic   | LRRC7      | missense  | NM_020794:p.L229I      |
| 7313   | 1   | 195288387 | 195288387 | C     | G   | C      | S      | splicing | F13B       | missense  | NM_001994:p.E519Q      |
| 7313   | 2   | 141468136 | 141468136 | C     | A   | C      | M      | exonic   | LRP1B      | nonsense  | NM_018557:p.G848X      |
| 7313   | 2   | 185509270 | 185509270 | G     | T   | G      | K      | exonic   | ZNF804A    | missense  | NM_194250:p.S301I      |
| 7313   | 3   | 86015129  | 86015129  | A     | T   | A      | W      | splicing | CADM2      | NA        | NA                     |
| 7313   | 3   | 109958594 | 109958594 | A     | G   | A      | R      | splicing | RETNLB     | NA        | NA                     |
| 7313   | 4   | 123328052 | 123328052 | G     | T   | G      | K      | exonic   | KIAA1109   | nonsense  | NM_015312:p.E188X      |
| 7313   | 4   | 155726590 | 155726590 | C     | A   | C      | M      | exonic   | FGA        | nonsense  | NM_000508:p.E481X      |
| 7313   | 5   | 35809811  | 35809811  | G     | T   | G      | K      | exonic   | SPEF2      | nonsense  | NM_024867:p.E1337X     |
| 7313   | 5   | 112427765 | 112427765 | T     | C   | T      | Y      | splicing | MCC        | NA        | NA                     |
| 7313   | 5   | 131979679 | 131979679 | -     | T   | A      | */+T   | exonic   | RAD50      | FS_ins    | NM_005732:p.H1041fs    |
| 7313   | 6   | 24594282  | 24594282  | C     | T   | C      | Y      | splicing | GPLD1      | silent    | NM_001503:p.E51E       |
| 7313   | 6   | 70120888  | 70120888  | C     | A   | C      | M      | exonic   | BAI3       | missense  | NM_001704:p.P1168T     |
| 7313   | 6   | 152782416 | 152782416 | A     | T   | A      | W      | exonic   | SYNE1      | missense  | NM_182961:p.V1801E     |
| 7313   | 7   | 63805342  | 63805342  | G     | T   | G      | K      | exonic   | ZNF107     | nonsense  | NM_016220:p.E409X      |
| 7313   | 7   | 111883293 | 111883293 | G     | T   | G      | K      | splicing | IFRD1      | missense  | NM_001550:p.G67V       |
| 7313   | 7   | 142170796 | 142170796 | T     | C   | T      | Y      | splicing | ENSG000002 | missense  | ENST00000311737:p.C68R |
| 7313   | 8   | 8271840   | 8271840   | C     | -   | A      | */-C   | exonic   | SGK223     | FS_del    | NM_001080826:p.V497fs  |
| 7313   | 8   | 16022442  | 16022442  | C     | A   | C      | M      | exonic   | MSR1       | nonsense  | NM_138715:p.E360X      |
| 7313   | 8   | 68340991  | 68340991  | C     | A   | C      | M      | exonic   | ARFGEF1    | nonsense  | NM_006421:p.E643X      |
| 7313   | 8   | 93068375  | 93068375  | C     | A   | C      | M      | splicing | RUNX1T1    | silent    | NM_001198679:p.G390G   |
| 7313   | 11  | 393681    | 393681    | -     | G   | C      | */+G   | exonic   | PKP3       | FS_ins    | NM_007183:p.R663fs     |
| 7313   | 11  | 129307205 | 129307205 | A     | T   | A      | W      | splicing | PRDM10     | NA        | NA                     |
| 7313   | 12  | 37984960  | 37984960  | C     | A   | C      | M      | exonic   | KIF21A     | missense  | NM_017641:p.C1484F     |
| 7313   | 12  | 54149865  | 54149865  | C     | A   | C      | M      | exonic   | OR6C70     | nonsense  | NM_001005499:p.E109X   |
| 7313   | 12  | 61240537  | 61240537  | G     | T   | G      | K      | splicing | MON2       | NA        | NA                     |
| 7313   | 14  | 20094643  | 20094643  | A     | T   | A      | W      | exonic   | RNASE9     | nonsense  | NM_001110358:p.C147X   |
| 7313   | 16  | 5065388   | 5065388   | A     | T   | A      | W      | splicing | ALG1       | NA        | NA                     |
| 7313   | 16  | 49731266  | 49731266  | C     | A   | C      | M      | exonic   | SALL1      | nonsense  | NM_002968:p.G790X      |
| 7313   | 17  | 77420125  | 77420125  | G     | C   | G      | S      | exonic   | ARHGDI1A   | missense  | NM_004309:p.I177M      |
| 7313   | 18  | 62323185  | 62323185  | G     | T   | G      | K      | exonic   | CDH19      | nonsense  | NM_021153:p.Y721X      |
| 7313   | 19  | 56072036  | 56072036  | T     | A   | T      | W      | exonic   | KLK2       | nonsense  | NM_005551:p.L197X      |
| 7313   | 22  | 45174373  | 45174373  | C     | A   | C      | M      | exonic   | CELSR1     | nonsense  | NM_014246:p.E1773X     |
| 7313   | X   | 29883324  | 29883324  | G     | A   | G      | R      | exonic   | IL1RAPL1   | missense  | NM_014271:p.M519I      |
| 7945   | 1   | 183031450 | 183031450 | C     | T   | C      | Y      | exonic   | FAM129A    | missense  | NM_052966:p.E691K      |
| 7945   | 1   | 218893175 | 218893175 | G     | -   | T      | */-G   | exonic   | MARK1      | FS_del    | NM_018650:p.G616fs     |
| 7945   | 1   | 245761921 | 245761921 | G     | C   | G      | S      | exonic   | OR2C3      | missense  | NM_198074:p.N172K      |
| 7996   | 1   | 214324762 | 214324762 | G     | T   | G      | K      | exonic   | USH2A      | missense  | NM_206933:p.P1690T     |

|       |    |           |           |   |   |   |      |          |          |          |                         |
|-------|----|-----------|-----------|---|---|---|------|----------|----------|----------|-------------------------|
| 7996  | 14 | 71274712  | 71274712  | A | T | A | W    | splicing | SIPA1L1  | missense | NM_015556:p.S1730C      |
| 7996  | 15 | 66774636  | 66774636  | C | A | C | M    | exonic   | CORO2B   | nonsense | NM_001190457:p.S102X    |
| 7996  | 17 | 7519188   | 7519188   | C | G | C | S    | exonic   | TP53     | missense | NM_001126117:p.R24P     |
| 7996  | X  | 29324443  | 29324443  | T | A | T | W    | exonic   | IL1RAPL1 | missense | NM_014271:p.F170L       |
| 12586 | 1  | 68677832  | 68677832  | C | T | C | Y    | splicing | RPE65    | missense | NM_000329:p.S242N       |
| 12586 | 1  | 70266524  | 70266524  | - | T | G | */+T | exonic   | LRRC7    | FS_ins   | NM_020794:p.G588fs      |
| 12586 | 1  | 70291385  | 70291385  | G | A | G | R    | exonic   | LRRC7    | missense | NM_020794:p.R1362Q      |
| 12586 | 1  | 174792283 | 174792283 | T | A | T | W    | exonic   | PAPPA2   | missense | NM_021936:p.F68I        |
| 12586 | 2  | 29308733  | 29308733  | G | A | G | R    | exonic   | ALK      | missense | NM_004304:p.P858L       |
| 12586 | 2  | 167810391 | 167810391 | G | A | G | R    | exonic   | XIRP2    | missense | NM_152381:p.G1415S      |
| 12586 | 3  | 46282127  | 46282127  | G | A | G | R    | exonic   | CCR3     | nonsense | NM_001164680:p.W176X    |
| 12586 | 3  | 130470141 | 130470141 | G | T | G | K    | exonic   | COPG     | nonsense | NM_016128:p.E588X       |
| 12586 | 3  | 135042829 | 135042829 | G | C | G | S    | exonic   | RAB6B    | nonsense | NM_016577:p.Y93X        |
| 12586 | 4  | 126589539 | 126589539 | G | A | G | R    | exonic   | FAT4     | missense | NM_024582:p.E2640K      |
| 12586 | 5  | 137616963 | 137616963 | G | A | G | R    | splicing | GFRA3    | missense | NM_001496:p.T342M       |
| 12586 | 5  | 140692131 | 140692131 | G | - | C | */-G | exonic   | PCDHGA1  | FS_del   | NM_031993:p.A566fs      |
| 12586 | 6  | 70105948  | 70105948  | C | G | C | S    | exonic   | BAI3     | missense | NM_001704:p.A1097G      |
| 12586 | 6  | 117757260 | 117757260 | C | A | C | M    | exonic   | ROS1     | missense | NM_002944:p.G1764V      |
| 12586 | 6  | 117757261 | 117757261 | C | A | C | M    | exonic   | ROS1     | missense | NM_002944:p.G1764W      |
| 12586 | 7  | 148482359 | 148482359 | C | - | T | */-C | exonic   | ZNF398   | FS_del   | NM_170686:p.I138fs      |
| 12586 | 7  | 150341383 | 150341383 | G | T | G | K    | exonic   | NOS3     | nonsense | NM_000603:p.E1080X      |
| 12586 | 8  | 41673173  | 41673173  | G | T | G | K    | exonic   | ANK1     | missense | NM_000037:p.T942K       |
| 12586 | 8  | 113346981 | 113346981 | C | A | C | M    | exonic   | CSMD3    | missense | NM_198123:p.D3175Y      |
| 12586 | 9  | 102086427 | 102086427 | C | T | C | Y    | exonic   | INVS     | nonsense | NM_183245:p.R597X       |
| 12586 | 11 | 109630045 | 109630045 | C | A | C | M    | splicing | RDX      | NA       | NA                      |
| 12586 | 13 | 47461017  | 47461017  | C | T | C | Y    | splicing | SUCLA2   | NA       | NA                      |
| 12586 | 14 | 22935332  | 22935332  | C | A | C | M    | splicing | MYH6     | NA       | NA                      |
| 12586 | 16 | 83658349  | 83658349  | G | - | T | */-G | exonic   | KIAA0513 | FS_del   | NM_014732:p.M57fs       |
| 12804 | 7  | 6047147   | 6047147   | G | A | G | R    | exonic   | EIF2AK1  | nonsense | NM_014413:p.Q341X       |
| 12804 | X  | 9995365   | 9995365   | C | T | C | Y    | exonic   | WWC3     | nonsense | NM_015691:p.R19X        |
| 12820 | 1  | 103161526 | 103161526 | G | T | G | K    | exonic   | COL11A1  | missense | NM_001854:p.P1203Q      |
| 12820 | 2  | 43818984  | 43818984  | A | T | A | W    | splicing | PLEKHH2  | missense | NM_172069:p.T982S       |
| 12820 | 2  | 167814324 | 167814324 | G | T | G | K    | exonic   | XIRP2    | missense | NM_152381:p.D2726Y      |
| 12820 | 3  | 11325456  | 11325456  | A | T | A | W    | splicing | ATG7     | NA       | NA                      |
| 12820 | 3  | 120106185 | 120106185 | C | T | C | Y    | splicing | IGSF11   | missense | NM_152538:p.R284K       |
| 12820 | 3  | 121872071 | 121872071 | T | A | T | W    | splicing | HGD      | NA       | NA                      |
| 12820 | 3  | 195888988 | 195888988 | C | - | G | */-C | exonic   | FAM43A   | FS_del   | NM_153690:p.S48fs       |
| 12820 | 5  | 36145839  | 36145839  | T | - | C | */-T | exonic   | LMBRD2   | FS_del   | NM_001007527:p.R586fs   |
| 12820 | 5  | 82870925  | 82870925  | C | A | C | M    | exonic   | VCAN     | nonsense | NM_001164097:p.S1129X   |
| 12820 | 5  | 140533977 | 140533977 | T | A | T | W    | exonic   | PCDHB7   | missense | NM_018940:p.F459L       |
| 12820 | 5  | 156525535 | 156525535 | C | T | C | Y    | exonic   | FAM71B   | missense | NM_130899:p.V75I        |
| 12820 | 6  | 29249672  | 29249672  | C | A | C | M    | exonic   | OR2J2    | nonsense | NM_030905:p.S94X        |
| 12820 | 6  | 152664774 | 152664774 | C | A | C | M    | exonic   | SYNE1    | nonsense | NM_182961:p.E5822X      |
| 12820 | 7  | 34854801  | 34854801  | G | T | G | K    | splicing | NPSR1    | NA       | NA                      |
| 12820 | 7  | 38223430  | 38223430  | C | T | C | Y    | splicing | STARD3NL | silent   | NM_032016:p.N184N       |
| 12820 | 7  | 81169946  | 81169946  | C | G | C | S    | exonic   | HGF      | missense | NM_000601:p.V692L       |
| 12820 | 7  | 100017608 | 100017608 | G | A | G | R    | exonic   | LRCH4    | nonsense | NM_002319:p.R162X       |
| 12820 | 8  | 113720196 | 113720196 | G | T | G | K    | exonic   | CSMD3    | missense | NM_198123:p.T1144K      |
| 12820 | 8  | 113737583 | 113737583 | T | C | T | Y    | exonic   | CSMD3    | missense | NM_198123:p.N994D       |
| 12820 | 9  | 8508246   | 8508246   | C | A | C | M    | exonic   | PTPRD    | missense | NM_002839:p.G382V       |
| 12820 | 9  | 130865644 | 130865644 | G | C | G | S    | splicing | FAM73B   | NA       | NA                      |
| 12820 | 9  | 133095947 | 133095947 | G | T | G | K    | exonic   | NUP214   | nonsense | NM_005085:p.G2062X      |
| 12820 | 12 | 77086688  | 77086688  | G | C | G | S    | exonic   | NAV3     | missense | NM_014903:p.R1631T      |
| 12820 | 14 | 59143754  | 59143754  | A | T | A | W    | splicing | RTN1     | NA       | NA                      |
| 12820 | 15 | 71334094  | 71334094  | C | T | C | Y    | exonic   | NEO1     | nonsense | NM_002499:p.Q655X       |
| 12820 | 16 | 82741448  | 82741448  | G | T | G | K    | splicing | LRRC50   | missense | NM_178452:p.G118C       |
| 12820 | 17 | 7519119   | 7519119   | T | C | T | Y    | exonic   | TP53     | missense | NM_001126117:p.H47R     |
| 12820 | 18 | 21060321  | 21060321  | A | C | A | M    | exonic   | ZNF521   | missense | NM_015461:p.M520R       |
| 12820 | 18 | 28514368  | 28514368  | G | T | G | K    | splicing | KLHL14   | NA       | NA                      |
| 12820 | 18 | 38808093  | 38808093  | G | A | G | R    | exonic   | RIT2     | nonsense | NM_002930:p.Q60X        |
| 12820 | X  | 65741067  | 65741067  | G | C | G | S    | exonic   | EDA2R    | nonsense | NM_021783:p.Y91X        |
| 12820 | X  | 85954789  | 85954789  | G | T | G | K    | splicing | DACH2    | missense | NM_001139515:p.G297C    |
| 12924 | 1  | 103222316 | 103222316 | C | A | C | M    | exonic   | COL11A1  | missense | NM_001854:p.G841V       |
| 12924 | 1  | 107669038 | 107669038 | C | G | C | S    | exonic   | NTNG1    | nonsense | NM_001113228:p.Y286X    |
| 12924 | 1  | 202663963 | 202663963 | C | A | C | M    | exonic   | PIK3C2B  | missense | NM_002646:p.L1469F      |
| 12924 | 1  | 218901829 | 218901829 | A | T | A | W    | exonic   | MARK1    | nonsense | NM_018650:p.K696X       |
| 12924 | 1  | 238559029 | 238559029 | G | T | G | K    | exonic   | FMN2     | nonsense | NM_020066:p.E1416X      |
| 12924 | 1  | 245721475 | 245721475 | C | A | C | M    | exonic   | OR2W5    | nonsense | NM_001004698:p.C141X    |
| 12924 | 2  | 53978955  | 53978955  | C | A | C | M    | exonic   | PSME4    | nonsense | NM_014614:p.E1155X      |
| 12924 | 2  | 167812135 | 167812135 | C | A | C | M    | exonic   | XIRP2    | missense | NM_152381:p.T1996N      |
| 12924 | 2  | 182720125 | 182720125 | C | A | C | M    | splicing | PDE1A    | NA       | NA                      |
| 12924 | 2  | 185511661 | 185511661 | T | C | T | Y    | exonic   | ZNF804A  | missense | NM_194250:p.I1098T      |
| 12924 | 2  | 216001148 | 216001148 | C | G | C | S    | splicing | FN1      | missense | NM_054034:p.G282R       |
| 12924 | 3  | 16615067  | 16615067  | C | A | C | M    | exonic   | DAZL     | nonsense | NM_001190811:p.E36X     |
| 12924 | 3  | 47887307  | 47887307  | C | G | C | S    | splicing | MAP4     | silent   | NM_002375:p.R953R       |
| 12924 | 3  | 122898003 | 122898003 | T | A | T | W    | exonic   | GOLGB1   | nonsense | NM_004487:p.K1348X      |
| 12924 | 4  | 40046028  | 40046028  | C | - | T | */-C | exonic   | CHRNA9   | FS_del   | NM_017581:c.738_738delC |
| 12924 | 4  | 55665621  | 55665621  | G | A | G | R    | exonic   | KDR      | nonsense | NM_002253:p.Q645X       |
| 12924 | 4  | 126592756 | 126592756 | G | T | G | K    | exonic   | FAT4     | missense | NM_024582:p.S3712I      |

|       |    |           |           |       |   |   |        |          |                 |          |                            |
|-------|----|-----------|-----------|-------|---|---|--------|----------|-----------------|----------|----------------------------|
| 12924 | 4  | 155939392 | 155939392 | C     | T | C | Y      | exonic   | RBM46           | nonsense | NM_144979:p.Q210X          |
| 12924 | 4  | 177286942 | 177286942 | C     | G | C | S      | exonic   | WDR17           | missense | NM_181265:p.L284V          |
| 12924 | 5  | 67625011  | 67625021  | CAGTA | - | T | */-    | exonic   | PIK3R1          | FS_del   | NM_181504:c.433_443del     |
|       |    |           |           | TAATC |   |   | CAGTAT |          |                 |          |                            |
|       |    |           |           | C     |   |   | AATCC  |          |                 |          |                            |
| 12924 | 5  | 152853684 | 152853684 | G     | C | G | S      | exonic   | GRIA1           | missense | NM_000827:p.G29A           |
| 12924 | 5  | 168032882 | 168032882 | C     | A | C | M      | exonic   | SLIT3           | missense | NM_003062:p.S1240I         |
| 12924 | 5  | 168109208 | 168109208 | A     | C | A | M      | exonic   | SLIT3           | missense | NM_003062:p.S662A          |
| 12924 | 6  | 42345060  | 42345060  | C     | A | C | M      | exonic   | TRERF1          | nonsense | NM_033502:p.G83X           |
| 12924 | 6  | 144851501 | 144851501 | G     | - | A | */-G   | splicing | UTRN            | NA       | NA                         |
| 12924 | 6  | 151936038 | 151936038 | G     | T | G | K      | exonic   | C6orf97         | nonsense | NM_025059:p.E271X          |
| 12924 | 7  | 36638166  | 36638166  | C     | T | C | Y      | splicing | AOAH            | NA       | NA                         |
| 12924 | 10 | 53128238  | 53128238  | G     | A | G | R      | exonic   | CSTF2T          | nonsense | NM_015235:p.Q360X          |
| 12924 | 10 | 67418483  | 67418483  | A     | T | A | W      | exonic   | CTNNA3          | missense | NM_013266:p.D746E          |
| 12924 | 11 | 26676542  | 26676542  | G     | C | G | S      | exonic   | SLC5A12         | nonsense | NM_178498:p.S313X          |
| 12924 | 11 | 56857011  | 56857011  | C     | A | C | M      | exonic   | SSRP1           | nonsense | NM_003146:p.E179X          |
| 12924 | 11 | 88222759  | 88222759  | G     | C | G | S      | exonic   | GRM5            | missense | NM_000842:p.R292G          |
| 12924 | 11 | 133618399 | 133618399 | G     | C | G | S      | splicing | VPS26B          | NA       | NA                         |
| 12924 | 12 | 77036028  | 77036028  | C     | T | C | Y      | exonic   | NAV3            | missense | NM_014903:p.H954Y          |
| 12924 | 12 | 77036052  | 77036052  | A     | T | A | W      | exonic   | NAV3            | nonsense | NM_014903:p.K962X          |
| 12924 | 12 | 87084352  | 87084352  | G     | A | G | R      | exonic   | TMTC3           | nonsense | NM_181783:p.W304X          |
| 12924 | 13 | 38349381  | 38349381  | G     | T | G | K      | splicing | FREM2           | NA       | NA                         |
| 12924 | 15 | 63411498  | 63411498  | C     | A | C | M      | splicing | IGDCC3          | NA       | NA                         |
| 12924 | 17 | 7520196   | 7520196   | G     | - | C | */-G   | exonic   | TP53            | FS_del   | NM_001126114:c.216_216delC |
| 12924 | 17 | 10341200  | 10341200  | C     | A | C | M      | exonic   | MYH1            | nonsense | NM_005963:p.G1523X         |
| 12924 | 17 | 10370759  | 10370759  | G     | A | G | R      | exonic   | MYH2            | nonsense | NM_017534:p.Q1357X         |
| 12924 | 17 | 15905731  | 15905731  | G     | A | G | R      | exonic   | NCOR1           | nonsense | NM_006311:p.Q1864X         |
| 12924 | 19 | 6630508   | 6630508   | C     | A | C | M      | splicing | C3              | NA       | NA                         |
| 12924 | 19 | 10471422  | 10471422  | G     | C | G | S      | exonic   | KEAP1           | missense | NM_012289:p.H96Q           |
| 12924 | 19 | 61394027  | 61394027  | T     | A | T | W      | exonic   | ZSCAN5B         | nonsense | NM_001080456:p.K244X       |
| 12924 | 20 | 34493939  | 34493939  | C     | - | G | */-C   | exonic   | DLGAP4          | FS_del   | NM_014902:c.405_405delC    |
| 12924 | 21 | 27224160  | 27224160  | G     | T | G | K      | exonic   | ADAMT55         | nonsense | NM_007038:p.S714X          |
| 12924 | 21 | 31041262  | 31041262  | C     | A | C | M      | exonic   | KRTAP21-2       | nonsense | NM_181617:p.G44X           |
| 12924 | X  | 41087939  | 41087939  | G     | T | G | K      | exonic   | DDX3X           | nonsense | NM_001193416:p.G229X       |
| 12924 | X  | 70389164  | 70389164  | C     | A | C | M      | splicing | ZMYM3           | nonsense | NM_001171163:p.G223X       |
| 12924 | X  | 153388977 | 153388977 | C     | A | C | M      | exonic   | FAM3A           | nonsense | NM_001171133:p.E104X       |
| 13280 | 1  | 175006868 | 175006868 | G     | - | T | */-G   | exonic   | PAPPA2          | FS_del   | NM_020318:c.4644_4644delG  |
| 13280 | 2  | 29996425  | 29996425  | C     | A | C | M      | exonic   | ALK             | missense | NM_004304:p.G202V          |
| 13280 | 2  | 98821013  | 98821013  | C     | G | C | S      | splicing | C2orf55         | NA       | NA                         |
| 13280 | 3  | 128823195 | 128823195 | G     | T | G | K      | splicing | MCM2            | NA       | NA                         |
| 13280 | 5  | 178291635 | 178291635 | G     | T | G | K      | exonic   | ZFP2            | nonsense | NM_030613:p.E239X          |
| 13280 | 6  | 64048515  | 64048515  | G     | - | T | */-G   | exonic   | LGSN            | FS_del   | NM_016571:c.900_900delC    |
| 13280 | 8  | 89156080  | 89156080  | C     | T | C | Y      | exonic   | MMP16           | nonsense | NM_005941:p.W364X          |
| 13280 | 10 | 64694428  | 64694428  | G     | A | G | R      | exonic   | JMJD1C          | nonsense | NM_032776:p.Q146X          |
| 13280 | 11 | 6189563   | 6189563   | C     | A | C | M      | exonic   | FAM160A2        | nonsense | NM_032127:p.G904X          |
| 13280 | 13 | 22813667  | 22813667  | C     | T | C | Y      | exonic   | SACS            | nonsense | NM_014363:p.W783X          |
| 13280 | 13 | 47935919  | 47935919  | A     | T | A | W      | exonic   | RB1             | nonsense | NM_000321:p.K720X          |
| 13280 | 17 | 26600139  | 26600139  | C     | G | C | S      | exonic   | NF1             | nonsense | NM_001042492:p.S1329X      |
| 13280 | 18 | 49239652  | 49239652  | C     | T | C | Y      | exonic   | DCC             | nonsense | NM_005215:p.R1149X         |
| 13280 | 19 | 17299498  | 17299498  | C     | T | C | Y      | splicing | ANO8            | silent   | NM_020959:p.Q806Q          |
| 13280 | 20 | 31084499  | 31084499  | C     | - | G | */-C   | exonic   | BPIL3           | FS_del   | NM_174897:c.146_146delC    |
| 13280 | X  | 128976652 | 128976652 | C     | - | A | */-C   | exonic   | BCORL1          | FS_del   | NM_021946:c.2223_2223delC  |
| 13394 | 1  | 33962809  | 33962809  | C     | A | C | M      | exonic   | CSMD2           | missense | NM_052896:p.A887S          |
| 13394 | 1  | 156864046 | 156864046 | A     | G | A | R      | exonic   | SPTA1           | missense | NM_003126:p.L1886P         |
| 13394 | 1  | 202670253 | 202670253 | T     | C | T | Y      | exonic   | PIK3C2B         | missense | NM_002646:p.H1208R         |
| 13394 | 2  | 58220303  | 58220303  | A     | T | A | W      | splicing | VRK2            | NA       | NA                         |
| 13394 | 3  | 10836396  | 10836396  | G     | T | G | K      | splicing | SLC6A11         | NA       | NA                         |
| 13394 | 3  | 10836397  | 10836397  | G     | T | G | K      | splicing | SLC6A11         | missense | NM_014229:p.G131V          |
| 13394 | 9  | 111938576 | 111938576 | G     | T | G | K      | exonic   | AKAP2           | nonsense | NM_007203:p.E311X          |
| 13394 | 10 | 17182203  | 17182203  | C     | A | C | M      | exonic   | CUBN            | missense | NM_001081:p.M524I          |
| 13394 | 11 | 10439826  | 10439826  | G     | T | G | K      | exonic   | AMPD3           | nonsense | NM_000480:p.E71X           |
| 13394 | 12 | 38043241  | 38043241  | G     | C | G | S      | exonic   | KIF21A          | missense | NM_017641:p.S315R          |
| 13394 | 15 | 83206930  | 83206930  | G     | A | G | R      | exonic   | ALPK3           | missense | NM_020778:p.C1599Y         |
| 13394 | 15 | 83207845  | 83207845  | G     | T | G | K      | exonic   | ALPK3           | missense | NM_020778:p.R1692L         |
| 13394 | 17 | 7520310   | 7520310   | G     | - | A | */-G   | exonic   | TP53            | FS_del   | NM_001126114:c.102_102delC |
| 13394 | 17 | 27645575  | 27645575  | G     | C | G | S      | splicing | RHBDL3          | NA       | NA                         |
| 13394 | 17 | 39687558  | 39687558  | T     | C | T | Y      | splicing | SLC4A1          | NA       | NA                         |
| 13394 | 20 | 1405926   | 1405926   | T     | C | T | Y      | intronic | SIRPB2          | NA       | NA                         |
| 13542 | 1  | 70030416  | 70030416  | G     | C | G | S      | exonic   | LRRC7           | missense | NM_020794:p.D98H           |
| 13542 | 1  | 150458174 | 150458174 | G     | A | G | R      | exonic   | HRNR            | missense | NM_001009931:p.S852L       |
| 13542 | 1  | 194887810 | 194887810 | A     | T | A | W      | splicing | ENSG00000000000 | NA       | NA                         |
| 13542 | 1  | 202705205 | 202705205 | G     | C | G | S      | exonic   | PIK3C2B         | missense | NM_002646:p.P117A          |
| 13542 | 2  | 168732055 | 168732055 | C     | A | C | M      | splicing | STK39           | missense | NM_013233:p.G144C          |
| 13542 | 3  | 39160796  | 39160796  | G     | A | G | R      | exonic   | CSRNP1          | nonsense | NM_033027:p.R206X          |
| 13542 | 5  | 131036112 | 131036112 | C     | A | C | M      | exonic   | FNIP1           | nonsense | NM_001008738:p.G614X       |
| 13542 | 5  | 132260182 | 132260182 | G     | T | G | K      | exonic   | AFF4            | nonsense | NM_014423:p.S680X          |
| 13542 | 6  | 117716586 | 117716586 | C     | A | C | M      | exonic   | ROS1            | missense | NM_002944:p.R2269L         |
| 13542 | 6  | 131318051 | 131318051 | G     | A | G | R      | exonic   | EPB41L2         | nonsense | NM_001199389:p.Q198X       |
| 13542 | 7  | 65254645  | 65254645  | G     | T | G | K      | exonic   | CRCP            | nonsense | NM_014478:p.E105X          |



|       |    |           |           |      |   |   |         |          |          |          |                           |
|-------|----|-----------|-----------|------|---|---|---------|----------|----------|----------|---------------------------|
| 13542 | 7  | 107408439 | 107408439 | C    | A | C | M       | exonic   | LAMB1    | nonsense | NM_002291:p.G244X         |
| 13542 | 8  | 41641662  | 41641662  | C    | T | C | Y       | exonic   | ANK1     | missense | NM_001142445:p.V13M       |
| 13542 | 8  | 86224364  | 86224364  | -    | A | G | */+A    | exonic   | LRRCC1   | FS_ins   | NM_033402:p.E404fs        |
| 13542 | 8  | 113767075 | 113767075 | C    | A | C | M       | exonic   | CSMD3    | missense | NM_198123:p.G740W         |
| 13542 | 10 | 75535004  | 75535007  | CCGA | - | T | */-CCGA | exonic   | VCL      | FS_del   | NM_014000:p.774_775del    |
| 13542 | 12 | 733449    | 733449    | C    | T | C | Y       | exonic   | WNK1     | missense | NM_018979:p.P153S         |
| 13542 | 12 | 33470346  | 33470346  | G    | T | G | K       | exonic   | SYT10    | nonsense | NM_198992:p.S168X         |
| 13542 | 12 | 54507422  | 54507422  | G    | A | G | R       | exonic   | DNAJC14  | nonsense | NM_032364:p.R430X         |
| 13542 | 16 | 66423859  | 66423859  | C    | A | C | M       | splicing | CENPT    | missense | NM_025082:p.R67S          |
| 13542 | X  | 91020927  | 91020927  | C    | A | C | M       | splicing | PCDH11X  | missense | NM_032969:p.P1011Q        |
| 13681 | 1  | 144312975 | 144312975 | -    | T | C | */+T    | exonic   | POLR3C   | FS_ins   | NM_006468:p.S263fs        |
| 13681 | 1  | 174792355 | 174792355 | A    | T | A | W       | exonic   | PAPPA2   | missense | NM_021936:p.T92S          |
| 13681 | 2  | 102407169 | 102407169 | A    | T | A | W       | exonic   | IL18RAP  | nonsense | NM_003853:p.K148X         |
| 13681 | 11 | 5819164   | 5819164   | G    | T | G | K       | exonic   | OR52E6   | nonsense | NM_001005167:p.Y180X      |
| 13681 | 12 | 77106175  | 77106175  | C    | T | C | Y       | exonic   | NAV3     | missense | NM_014903:p.A1914V        |
| 13681 | 13 | 99751718  | 99751718  | G    | T | G | K       | exonic   | PCCA     | nonsense | NM_000282:p.E357X         |
| 13681 | 19 | 10463584  | 10463584  | C    | A | C | M       | exonic   | KEAP1    | missense | NM_012289:p.G332C         |
| 13681 | X  | 71812673  | 71812673  | A    | - | C | */-A    | exonic   | PHKA1    | nonsense | NM_001172436:p.L197X      |
| 13681 | X  | 149663568 | 149663568 | -    | T | G | */+T    | exonic   | MTMR1    | FS_ins   | NM_003828:p.W509fs        |
| 15145 | 1  | 152299638 | 152299638 | A    | T | A | W       | splicing | NUP210L  | NA       | NA                        |
| 15145 | 2  | 140771876 | 140771876 | G    | T | G | K       | exonic   | LRP1B    | missense | NM_018557:p.P4313Q        |
| 15145 | 19 | 10461447  | 10461447  | G    | A | G | R       | exonic   | KEAP1    | missense | NM_012289:p.R470C         |
| 15145 | X  | 152639620 | 152639620 | A    | G | A | R       | splicing | BCAP31   | missense | NM_001139457:p.W99R       |
| 15822 | 2  | 172358391 | 172358391 | G    | C | G | S       | exonic   | SLC25A12 | missense | NM_003705:p.L480V         |
| 15822 | 3  | 149942327 | 149942327 | G    | A | G | R       | exonic   | AGTR1    | missense | NM_009585:p.R272H         |
| 15822 | 15 | 39600027  | 39600027  | G    | C | G | S       | exonic   | RPAP1    | missense | NM_015540:p.H1217D        |
| 15822 | 17 | 7520046   | 7520047   | CA   | - | T | */-CA   | exonic   | TP53     | FS_del   | NM_001126113:p.122_122del |
| 15822 | 17 | 7623316   | 7623316   | A    | C | A | M       | exonic   | DNAH2    | missense | NM_020877:p.N1858H        |
| 15858 | 3  | 99370847  | 99370847  | C    | A | C | M       | exonic   | OR5H15   | nonsense | NM_001005515:p.S205X      |
| 15858 | 3  | 156338584 | 156338584 | G    | T | G | K       | splicing | MME      | NA       | NA                        |
| 15858 | 7  | 47861096  | 47861096  | C    | A | C | M       | exonic   | PKD1L1   | nonsense | NM_138295:p.E1590X        |
| 15858 | 7  | 73607760  | 73607760  | G    | T | G | K       | splicing | GTF2IRD1 | nonsense | NM_001199207:p.E707X      |
| 15858 | 7  | 106332952 | 106332952 | A    | G | A | R       | exonic   | PIK3CG   | missense | NM_002649:p.K1065E        |
| 15858 | 8  | 87629779  | 87629779  | G    | A | G | R       | splicing | CPNE3    | NA       | NA                        |
| 15858 | 10 | 17020982  | 17020982  | A    | T | A | W       | exonic   | CUBN     | missense | NM_001081:p.Y1907N        |
| 15858 | X  | 135560223 | 135560223 | G    | T | G | K       | splicing | CD40LG   | NA       | NA                        |
| 16246 | 1  | 85185304  | 85185304  | T    | C | T | Y       | splicing | MCOLN2   | missense | NM_153259:p.T283A         |
| 16246 | 1  | 156873075 | 156873075 | C    | A | C | M       | exonic   | SPTA1    | missense | NM_003126:p.A1764S        |
| 16246 | 1  | 238138096 | 238138096 | A    | T | A | W       | exonic   | CHRM3    | missense | NM_000740:p.Y241F         |
| 16246 | 2  | 24114239  | 24114239  | G    | A | G | R       | exonic   | C2orf44  | nonsense | NM_001142319:p.Q544X      |
| 16246 | 3  | 122823258 | 122823258 | G    | T | G | K       | exonic   | FBXO40   | nonsense | NM_016298:p.E98X          |
| 16246 | 3  | 168667651 | 168667651 | G    | A | G | R       | exonic   | SERPINI2 | nonsense | NM_006217:p.Q122X         |
| 16246 | 5  | 33719744  | 33719744  | A    | T | A | W       | exonic   | ADAMTS12 | missense | NM_030955:p.Y270N         |
| 16246 | 5  | 156522864 | 156522864 | C    | A | C | M       | exonic   | FAM71B   | missense | NM_130899:p.M330I         |
| 16246 | 7  | 81177454  | 81177454  | C    | G | C | S       | exonic   | HGF      | missense | NM_000601:p.V496L         |
| 16246 | 7  | 128274184 | 128274184 | G    | T | G | K       | exonic   | FLNC     | missense | NM_001127487:p.R1426L     |
| 16246 | 8  | 41649300  | 41649300  | C    | A | C | M       | exonic   | ANK1     | nonsense | NM_000037:p.E1609X        |
| 16246 | 8  | 139279008 | 139279008 | G    | T | G | K       | exonic   | FAM135B  | nonsense | NM_015912:p.Y252X         |
| 16246 | 9  | 34333373  | 34333373  | C    | T | C | Y       | exonic   | NUDT2    | nonsense | NM_147173:p.Q127X         |
| 16246 | 9  | 111745274 | 111745274 | G    | T | G | K       | exonic   | PALM2    | missense | NM_001037293:p.K296N      |
| 16246 | 10 | 21169757  | 21169757  | C    | A | C | M       | exonic   | NEBL     | nonsense | NM_006393:p.E419X         |
| 16246 | 10 | 28269742  | 28269742  | T    | A | T | W       | splicing | ARMC4    | NA       | NA                        |
| 16246 | 10 | 50489118  | 50489118  | C    | A | C | M       | exonic   | SLC18A3  | nonsense | NM_003055:p.S109X         |
| 16246 | 10 | 68969392  | 68969392  | G    | T | G | K       | exonic   | CTNNA3   | missense | NM_013266:p.P112T         |
| 16246 | 10 | 96084464  | 96084464  | A    | G | A | R       | splicing | NOC3L    | missense | NM_022451:p.S731P         |
| 16246 | 11 | 12182371  | 12182371  | A    | G | A | R       | splicing | MICAL2   | NA       | NA                        |
| 16246 | 12 | 14501436  | 14501436  | G    | T | G | K       | exonic   | ATF7IP   | nonsense | NM_018179:p.E700X         |
| 16246 | 12 | 29532011  | 29532011  | -    | A | C | */+A    | exonic   | OVCH1    | FS_ins   | NM_183378:p.W258fs        |
| 16246 | 12 | 65074319  | 65074319  | C    | A | C | M       | exonic   | GRIP1    | nonsense | NM_021150:p.G637X         |
| 16246 | 13 | 47839630  | 47839630  | G    | T | G | K       | splicing | RB1      | NA       | NA                        |
| 16246 | 13 | 76678855  | 76678855  | C    | A | C | M       | exonic   | MYCBP2   | nonsense | NM_015057:p.E1175X        |
| 16246 | 17 | 36977527  | 36977527  | C    | A | C | M       | splicing | KRT9     | nonsense | NM_000226:p.E466X         |
| 16246 | 19 | 60739402  | 60739402  | -    | A | C | */+A    | exonic   | SBK2     | FS_ins   | NM_001101401:p.L24fs      |
| 16246 | X  | 91019650  | 91019650  | G    | T | G | K       | exonic   | PCDH11X  | missense | NM_032969:p.R585S         |
| 16246 | X  | 91760002  | 91760002  | G    | T | G | K       | exonic   | PCDH11X  | missense | NM_032969:p.A1141S        |
| 16461 | 1  | 12339107  | 12339107  | G    | T | G | K       | exonic   | VPS13D   | nonsense | NM_018156:p.E3288X        |
| 16461 | 1  | 33771372  | 33771372  | C    | A | C | M       | exonic   | CSMD2    | missense | NM_052896:p.G3202W        |
| 16461 | 1  | 99160143  | 99160143  | G    | T | G | K       | exonic   | LPPR5    | nonsense | NM_001010861:p.C227X      |
| 16461 | 1  | 181763743 | 181763743 | G    | T | G | K       | exonic   | SMG7     | nonsense | NM_173156:p.E172X         |
| 16461 | 1  | 214318104 | 214318104 | C    | A | C | M       | exonic   | USH2A    | missense | NM_206933:p.G1841V        |
| 16461 | 1  | 228405582 | 228405582 | C    | G | C | S       | exonic   | GALNT2   | nonsense | NM_004481:p.Y99X          |
| 16461 | 2  | 11251832  | 11251832  | C    | A | C | M       | splicing | ROCK2    | NA       | NA                        |
| 16461 | 2  | 127978729 | 127978729 | C    | G | C | S       | splicing | IWS1     | NA       | NA                        |
| 16461 | 2  | 140845229 | 140845229 | C    | T | C | Y       | exonic   | LRP1B    | missense | NM_018557:p.G3622S        |
| 16461 | 2  | 141174422 | 141174422 | C    | A | C | M       | exonic   | LRP1B    | missense | NM_018557:p.K2222N        |
| 16461 | 2  | 170523284 | 170523284 | T    | A | T | W       | splicing | UBR3     | NA       | NA                        |
| 16461 | 3  | 120106213 | 120106213 | C    | A | C | M       | exonic   | IGSF11   | nonsense | NM_152538:p.E275X         |
| 16461 | 3  | 121008984 | 121008984 | G    | T | G | K       | splicing | NR1I2    | missense | NM_033013:p.R66M          |
| 16461 | 4  | 47637581  | 47637581  | G    | T | G | K       | exonic   | CNGA1    | nonsense | NM_001142564:p.S276X      |

|       |    |           |           |        |   |   |      |          |            |          |                       |
|-------|----|-----------|-----------|--------|---|---|------|----------|------------|----------|-----------------------|
| 16461 | 4  | 111617255 | 111617255 | C      | T | C | Y    | exonic   | ENPEP      | missense | NM_001977:p.P79L      |
| 16461 | 4  | 126592414 | 126592414 | G      | C | G | S    | exonic   | FAT4       | missense | NM_024582:p.G3598A    |
| 16461 | 4  | 177320231 | 177320231 | A      | T | A | W    | exonic   | WDR17      | missense | NM_181265:p.K921I     |
| 16461 | 5  | 138735759 | 138735759 | G      | C | G | S    | exonic   | SLC23A1    | nonsense | NM_152685:p.Y548X     |
| 16461 | 6  | 28401960  | 28401960  | T      | A | T | W    | exonic   | ZNF323     | nonsense | NM_001135216:p.K395X  |
| 16461 | 6  | 55236465  | 55236465  | T      | - | G | */-T | splicing | HCRTR2     | FS_del   | NM_001526:p.G216fs    |
| 16461 | 6  | 126283848 | 126283848 | G      | T | G | K    | exonic   | NCOA7      | nonsense | NM_001199621:p.E656X  |
| 16461 | 6  | 152748603 | 152748603 | C      | A | C | M    | exonic   | SYNE1      | nonsense | NM_182961:p.E2851X    |
| 16461 | 8  | 86229469  | 86229469  | A      | T | A | W    | exonic   | LRRCC1     | nonsense | NM_033402:p.R564X     |
| 16461 | 9  | 8309927   | 8309927   | G      | T | G | K    | exonic   | PTPRD      | missense | NM_002839:p.S1858R    |
| 16461 | 10 | 59667516  | 59667516  | C      | A | C | M    | exonic   | IPMK       | nonsense | NM_152230:p.E86X      |
| 16461 | 10 | 116082968 | 116082968 | A      | G | A | R    | splicing | AFAP1L2    | NA       | NA                    |
| 16461 | 10 | 116965629 | 116965629 | G      | C | G | S    | splicing | ATRNL1     | NA       | NA                    |
| 16461 | 11 | 55015121  | 55015121  | G      | T | G | K    | splicing | ENSG000001 | NA       | NA                    |
| 16461 | 11 | 63642165  | 63642165  | -      | T | C | */+T | exonic   | FLRT1      | FS_ins   | NM_013280:p.P617fs    |
| 16461 | 12 | 70236666  | 70236666  | A      | G | A | R    | splicing | LGR5       | silent   | NM_003667:p.L215L     |
| 16461 | 14 | 69514388  | 69514388  | G      | A | G | R    | splicing | SMOC1      | missense | NM_022137:p.G160D     |
| 16461 | 14 | 72729214  | 72729214  | C      | T | C | Y    | exonic   | PSEN1      | nonsense | NM_007318:p.R216X     |
| 16461 | 15 | 26184426  | 26184426  | T      | A | T | W    | exonic   | HERC2      | missense | NM_004667:p.K601N     |
| 16461 | 15 | 62293196  | 62293196  | T      | A | T | W    | exonic   | CSNK1G1    | nonsense | NM_022048:p.K209X     |
| 16461 | 16 | 60318499  | 60318499  | T      | A | T | W    | splicing | CDH8       | missense | NM_001796:p.Q512H     |
| 16461 | 17 | 7519186   | 7519186   | C      | A | C | M    | exonic   | TP53       | missense | NM_001126117:p.V25F   |
| 16461 | 17 | 63164444  | 63164444  | G      | T | G | K    | exonic   | NOL11      | nonsense | NM_015462:p.E475X     |
| 16461 | 18 | 20264297  | 20264297  | A      | T | A | W    | exonic   | IMPACT     | nonsense | NM_018439:p.K78X      |
| 16461 | 18 | 21060333  | 21060333  | G      | A | G | R    | exonic   | ZNF521     | missense | NM_015461:p.P516L     |
| 16461 | 18 | 27352199  | 27352199  | G      | C | G | S    | splicing | DSG2       | NA       | NA                    |
| 16461 | 18 | 40784483  | 40784483  | G      | C | G | S    | exonic   | SETBP1     | missense | NM_015559:p.E394Q     |
| 16461 | 18 | 49230869  | 49230869  | G      | A | G | R    | splicing | DCC        | silent   | NM_005215:p.E1077E    |
| 16461 | 19 | 11005877  | 11005877  | G      | A | G | R    | splicing | SMARCA4    | NA       | NA                    |
| 16461 | 19 | 52277392  | 52277392  | C      | G | C | S    | splicing | ZC3H4      | missense | NM_015168:p.G407R     |
| 16461 | 20 | 2589617   | 2589617   | T      | C | T | Y    | splicing | IDH3B      | NA       | NA                    |
| 16461 | 20 | 43315658  | 43315658  | G      | T | G | K    | exonic   | SLPI       | nonsense | NM_003064:p.C72X      |
| 16461 | 21 | 36542725  | 36542725  | A      | T | A | W    | exonic   | DOPEY2     | nonsense | NM_005128:p.K1663X    |
| 16461 | 22 | 22789466  | 22789466  | G      | T | G | K    | exonic   | CABIN1     | nonsense | NM_001201429:p.G531X  |
| 16461 | X  | 77799712  | 77799712  | C      | A | C | M    | exonic   | ZCCHC5     | nonsense | NM_152694:p.G288X     |
| 16461 | X  | 91020657  | 91020657  | G      | T | G | K    | exonic   | PCDH11X    | missense | NM_032969:p.W921L     |
| 16617 | 2  | 100947066 | 100947066 | T      | A | T | W    | exonic   | NPAS2      | nonsense | NM_002518:p.L238X     |
| 16617 | 2  | 144873038 | 144873038 | G      | C | G | S    | exonic   | ZEB2       | missense | NM_014795:p.P729R     |
| 16617 | 3  | 140148040 | 140148055 | TCCCGG | - | C | */-  | exonic   | FOXL2      | FS_del   | NM_023067:p.67_72del  |
|       |    |           |           | GCTCT  |   |   |      | TCCCGG   |            |          |                       |
|       |    |           |           | CGCGG  |   |   |      | CTCTCGC  |            |          |                       |
|       |    |           |           | A      |   |   |      | GGA      |            |          |                       |
| 16617 | 4  | 163174261 | 163174261 | C      | A | C | M    | splicing | FSTL5      | NA       | NA                    |
| 16617 | 5  | 36147118  | 36147118  | C      | A | C | M    | splicing | LMBRD2     | NA       | NA                    |
| 16617 | 6  | 155195790 | 155195790 | C      | T | C | Y    | exonic   | SCAF8      | nonsense | NM_014892:p.R1129X    |
| 16617 | 7  | 81473027  | 81473027  | G      | A | G | R    | exonic   | CACNA2D1   | missense | NM_000722:p.P502L     |
| 16617 | 7  | 106297104 | 106297104 | C      | A | C | M    | exonic   | PIK3CG     | missense | NM_002649:p.A621D     |
| 16617 | 10 | 68649635  | 68649635  | C      | A | C | M    | splicing | CTNNA3     | NA       | NA                    |
| 16617 | 10 | 127833864 | 127833864 | T      | A | T | W    | splicing | ADAM12     | missense | NM_021641:p.E87D      |
| 16617 | 15 | 43510258  | 43510258  | A      | G | A | R    | splicing | C15orf48   | NA       | NA                    |
| 16617 | X  | 77175949  | 77175949  | C      | - | T | */-C | exonic   | ATP7A      | FS_del   | NM_000052:p.S1162fs   |
| 16989 | 1  | 173371663 | 173371663 | G      | - | T | */-G | exonic   | TNN        | FS_del   | NM_022093:p.V1130fs   |
| 16989 | 1  | 245655305 | 245655305 | C      | A | C | M    | exonic   | NLRP3      | missense | NM_001079821:p.A646D  |
| 16989 | 2  | 25323041  | 25323041  | G      | - | A | */-G | exonic   | DNMT3A     | FS_del   | NM_022552:p.L411fs    |
| 16989 | 2  | 80383448  | 80383448  | G      | T | G | K    | exonic   | LRRTM1     | nonsense | NM_178839:p.Y336X     |
| 16989 | 5  | 168133912 | 168133912 | C      | T | C | Y    | exonic   | SLIT3      | missense | NM_003062:p.D401N     |
| 16989 | 16 | 20236199  | 20236199  | C      | G | C | S    | splicing | GP2        | NA       | NA                    |
| 16989 | 17 | 35135509  | 35135509  | A      | T | A | W    | exonic   | ERBB2      | missense | NM_004448:p.T917S     |
| 16989 | 19 | 36459745  | 36459745  | G      | C | G | S    | exonic   | TSHZ3      | missense | NM_020856:p.R932G     |
| 18472 | 1  | 239818721 | 239818721 | C      | T | C | Y    | exonic   | KMO        | missense | NM_003679:p.A355V     |
| 18472 | 2  | 157992155 | 157992155 | A      | G | A | R    | exonic   | CYTIP      | missense | NM_004288:p.M167T     |
| 18472 | 2  | 201839759 | 201839759 | G      | T | G | K    | splicing | CASP8      | missense | NM_001080124:p.R102M  |
| 18472 | 2  | 206732976 | 206732976 | G      | A | G | R    | exonic   | EEF1B2     | missense | NM_001959:p.A10T      |
| 18472 | 2  | 220201467 | 220201467 | C      | A | C | M    | exonic   | SLC4A3     | missense | NM_201574:p.L50I      |
| 18472 | 4  | 75703705  | 75703705  | G      | A | G | R    | exonic   | AREG       | missense | NM_001657:p.G157R     |
| 18472 | 6  | 29697940  | 29697940  | G      | A | G | R    | exonic   | GABBR1     | nonsense | NM_001470:p.R329X     |
| 18472 | 8  | 145062820 | 145062820 | C      | T | C | Y    | exonic   | PLEC       | missense | NM_201384:p.R4386H    |
| 18472 | 9  | 115970958 | 115970958 | G      | C | G | S    | exonic   | COL27A1    | missense | NM_032888:p.R434S     |
| 18472 | 9  | 133759164 | 133759164 | T      | C | T | Y    | exonic   | MED27      | missense | NM_004269:p.M204V     |
| 18472 | 10 | 26546545  | 26546545  | C      | T | C | Y    | splicing | GAD2       | missense | NM_001134366:p.A26V   |
| 18472 | 11 | 128286493 | 128286493 | C      | T | C | Y    | exonic   | KCNJ5      | missense | NM_000890:p.R39C      |
| 18472 | 12 | 537121    | 537121    | G      | A | G | R    | exonic   | B4GALNT3   | missense | NM_173593:p.V823I     |
| 18472 | 12 | 52001409  | 52001409  | G      | - | C | */-G | exonic   | AAAS       | FS_del   | NM_015665:p.P36fs     |
| 18472 | 14 | 22896379  | 22896379  | C      | A | C | M    | exonic   | EFS        | missense | NM_032459:p.G435C     |
| 18472 | 14 | 51575302  | 51575302  | G      | T | G | K    | exonic   | NID2       | missense | NM_007361:p.L724M     |
| 18472 | 14 | 64475994  | 64475994  | G      | A | G | R    | exonic   | GPX2       | missense | NM_002083:p.P180S     |
| 18472 | 16 | 84512357  | 84512357  | T      | - | A | */-T | exonic   | IRF8       | FS_del   | NM_002163:p.F417fs    |
| 18472 | 17 | 7163125   | 7163125   | G      | A | G | R    | exonic   | NEURL4     | missense | NM_001005408:p.R1216W |
| 18472 | 17 | 46452553  | 46452553  | T      | C | T | Y    | exonic   | SPAG9      | missense | NM_001130528:p.M353V  |

|         |    |           |           |      |   |   |         |          |          |          |                          |
|---------|----|-----------|-----------|------|---|---|---------|----------|----------|----------|--------------------------|
| 18472   | 18 | 27947722  | 27947722  | T    | C | T | Y       | exonic   | RNF138   | missense | NM_001191324:p.M135T     |
| 18472   | X  | 53619386  | 53619386  | T    | C | T | Y       | exonic   | HUWE1    | missense | NM_031407:p.Y1991C       |
| 18472   | X  | 70741089  | 70741089  | A    | G | A | R       | exonic   | ACRC     | missense | NM_052957:p.R413G        |
| 18472   | X  | 152840026 | 152840026 | G    | A | G | R       | exonic   | ARHGAP4  | missense | NM_001666:p.R141C        |
| LU-1516 | 6  | 31233141  | 31233141  | C    | A | C | M       | splicing | CCHCR1   | missense | NM_001105563:p.R72S      |
| LU-1991 | 1  | 153416390 | 153416390 | G    | A | G | R       | splicing | TRIM46   | silent   | NM_025058:p.E303E        |
| LU-1991 | 1  | 174317038 | 174317038 | G    | A | G | R       | exonic   | RFWD2    | nonsense | NM_022457:p.R384X        |
| LU-1991 | 1  | 213920329 | 213920329 | G    | A | G | R       | exonic   | USH2A    | nonsense | NM_206933:p.Q4027X       |
| LU-1991 | 1  | 214436544 | 214436544 | G    | C | G | S       | exonic   | USH2A    | missense | NM_007123:p.Q1409E       |
| LU-1991 | 2  | 39850514  | 39850514  | -    | T | G | */+T    | exonic   | THUMP2   | FS_ins   | NM_025264:p.T171fs       |
| LU-1991 | 2  | 44055401  | 44055401  | T    | A | T | W       | splicing | LRPPRC   | missense | NM_133259:p.T289S        |
| LU-1991 | 2  | 167815498 | 167815498 | G    | T | G | K       | exonic   | XIRP2    | missense | NM_152381:p.R3117L       |
| LU-1991 | 2  | 185511592 | 185511592 | C    | A | C | M       | exonic   | ZNF804A  | missense | NM_194250:p.P1075Q       |
| LU-1991 | 2  | 190136556 | 190136556 | G    | T | G | K       | splicing | SLC40A1  | silent   | NM_014585:p.I467I        |
| LU-1991 | 3  | 43571774  | 43571774  | C    | A | C | M       | splicing | ANO10    | missense | NM_018075:p.Q556H        |
| LU-1991 | 3  | 109657390 | 109657390 | G    | T | G | K       | exonic   | MYH15    | nonsense | NM_014981:p.C735X        |
| LU-1991 | 4  | 20102491  | 20102491  | C    | A | C | M       | exonic   | SLIT2    | nonsense | NM_004787:p.S262X        |
| LU-1991 | 4  | 116011556 | 116011556 | C    | A | C | M       | splicing | NDST4    | NA       | NA                       |
| LU-1991 | 4  | 126631264 | 126631264 | C    | G | C | S       | exonic   | FAT4     | missense | NM_024582:p.P4613A       |
| LU-1991 | 4  | 129262757 | 129262757 | G    | A | G | R       | exonic   | LARP1B   | nonsense | NM_178043:p.W496X        |
| LU-1991 | 5  | 63292603  | 63292603  | C    | A | C | M       | exonic   | HTR1A    | nonsense | NM_000524:p.E234X        |
| LU-1991 | 5  | 170278394 | 170278394 | G    | T | G | K       | exonic   | RANBP17  | nonsense | NM_022897:p.G343X        |
| LU-1991 | 6  | 127941611 | 127941611 | G    | T | G | K       | splicing | C6orf58  | NA       | NA                       |
| LU-1991 | 7  | 102994403 | 102994403 | C    | T | C | Y       | exonic   | RELN     | nonsense | NM_005045:p.W1543X       |
| LU-1991 | 7  | 106311891 | 106311891 | C    | - | A | */-C    | exonic   | PIK3CG   | FS_del   | NM_002649:p.T939fs       |
| LU-1991 | 7  | 142335346 | 142335346 | G    | C | G | S       | exonic   | TRPV5    | missense | NM_019841:p.L290V        |
| LU-1991 | 9  | 96102064  | 96102064  | A    | T | A | W       | exonic   | ZNF169   | nonsense | NM_194320:p.R135X        |
| LU-1991 | 10 | 15160750  | 15160750  | C    | A | C | M       | exonic   | ACBD7    | nonsense | NM_001039844:p.G47X      |
| LU-1991 | 10 | 15726035  | 15726035  | C    | T | C | Y       | splicing | ITGA8    | missense | NM_003638:p.D467N        |
| LU-1991 | 11 | 57727622  | 57727622  | G    | C | G | S       | exonic   | OR1S2    | nonsense | NM_001004459:p.S203X     |
| LU-1991 | 11 | 87940653  | 87940653  | C    | A | C | M       | exonic   | GRM5     | nonsense | NM_000842:p.E616X        |
| LU-1991 | 12 | 131120139 | 131120139 | G    | C | G | S       | splicing | EP400    | missense | NM_015409:p.Q3006H       |
| LU-1991 | 15 | 53763422  | 53763422  | C    | G | C | S       | splicing | PRTG     | NA       | NA                       |
| LU-1991 | 16 | 82786039  | 82786039  | G    | C | G | S       | splicing | ADAD2    | NA       | NA                       |
| LU-1991 | 17 | 7519192   | 7519192   | T    | G | T | K       | exonic   | TP53     | missense | NM_001126117:p.T23P      |
| LU-1991 | 17 | 10157324  | 10157324  | C    | A | C | M       | exonic   | MYH13    | nonsense | NM_003802:p.E1353X       |
| LU-1991 | 17 | 38090868  | 38090868  | G    | T | G | K       | exonic   | CNTNAP1  | nonsense | NM_003632:p.E207X        |
| LU-1991 | 17 | 38384953  | 38384953  | C    | A | C | M       | exonic   | AARSD1   | nonsense | NM_001136042:p.E96X      |
| LU-1991 | 18 | 6954803   | 6954803   | C    | G | C | S       | splicing | LAMA1    | NA       | NA                       |
| LU-1991 | 18 | 21058618  | 21058618  | G    | T | G | K       | exonic   | ZNF521   | missense | NM_015461:p.L1088M       |
| LU-1991 | 18 | 21061233  | 21061233  | G    | T | G | K       | exonic   | ZNF521   | missense | NM_015461:p.S216Y        |
| LU-2349 | 7  | 54787609  | 54787609  | T    | C | T | Y       | splicing | SEC61G   | NA       | NA                       |
| LU-2349 | 7  | 81552054  | 81552054  | C    | A | C | M       | exonic   | CACNA2D1 | missense | NM_000722:p.G209C        |
| LU-2349 | 10 | 115364589 | 115364589 | T    | A | T | W       | splicing | NRAP     | missense | NM_006175:p.D1027V       |
| LU-2349 | 11 | 65947914  | 65947914  | T    | A | T | W       | exonic   | NPAS4    | nonsense | NM_178864:p.L326X        |
| LU-2349 | 12 | 77122921  | 77122921  | C    | A | C | M       | exonic   | NAV3     | missense | NM_014903:p.L2282M       |
| Lu-2375 | 11 | 408922    | 408922    | C    | T | C | Y       | exonic   | ANO9     | missense | NM_001012302:p.G668R     |
| Lu-597  | 3  | 47136892  | 47136895  | CTCT | - | A | */-CTCT | exonic   | SETD2    | FS_del   | NM_014159:c.4235_4238del |
| Lu-597  | 12 | 121946481 | 121946481 | G    | C | G | S       | exonic   | VPS37B   | missense | NM_024667:p.L28V         |
| Lu-597  | 20 | 33776439  | 33776439  | A    | T | A | W       | exonic   | RBM39    | missense | NM_184234:p.C157S        |

**Supplementary Table 6.** Concordance of genotypes from the HapMap project and from the NimbleGen platform

| IMAGE_ID                      | BG_COR | CALL_RATE | ACCURACY | FALSE_CALL | CALL_RATE_GOOD | ACCURACY_GOOD | FALSE_CALL_GOOD | CALL_RATE_POOR | ACCURACY_POOR | FALSE_CALL_POOR | NR_REF_SNPS | NR_REF_SNPS_GOOD |
|-------------------------------|--------|-----------|----------|------------|----------------|---------------|-----------------|----------------|---------------|-----------------|-------------|------------------|
| 449920A01_2010-11-19_GMLE_532 | GMLE   | 99.68     | 99.9     | 0.1        | 99.7           | 99.9          | 0.1             | 99.63          | 99.88         | 0.12            | 12636       | 9406             |
| 449920A02_2010-11-19_GMLE_532 | GMLE   | 99.68     | 99.9     | 0.1        | 99.66          | 99.89         | 0.11            | 99.72          | 99.91         | 0.09            | 12636       | 9406             |
| 449920A03_2010-11-19_GMLE_532 | GMLE   | 99.66     | 99.94    | 0.06       | 99.64          | 99.96         | 0.04            | 99.72          | 99.88         | 0.12            | 12636       | 9406             |
| 449920A04_2010-11-19_GMLE_532 | GMLE   | 99.73     | 99.9     | 0.1        | 99.73          | 99.9          | 0.1             | 99.72          | 99.88         | 0.12            | 12636       | 9406             |
| 449920A05_2010-11-19_GMLE_532 | GMLE   | 99.67     | 99.92    | 0.08       | 99.68          | 99.93         | 0.07            | 99.63          | 99.91         | 0.09            | 12636       | 9406             |
| 449920A06_2010-11-19_GMLE_532 | GMLE   | 99.72     | 99.92    | 0.08       | 99.72          | 99.94         | 0.06            | 99.72          | 99.88         | 0.12            | 12636       | 9406             |
| 449920A08_2010-11-19_GMLE_532 | GMLE   | 99.8      | 99.94    | 0.06       | 99.81          | 99.95         | 0.05            | 99.78          | 99.91         | 0.09            | 12636       | 9406             |
| 449920A09_2010-11-19_GMLE_532 | GMLE   | 99.82     | 99.94    | 0.06       | 99.83          | 99.96         | 0.04            | 99.78          | 99.88         | 0.12            | 12636       | 9406             |
| 449920A10_2010-11-19_GMLE_532 | GMLE   | 99.74     | 99.94    | 0.06       | 99.74          | 99.96         | 0.04            | 99.72          | 99.91         | 0.09            | 12636       | 9406             |
| 449920A11_2010-11-19_GMLE_532 | GMLE   | 99.83     | 99.94    | 0.06       | 99.84          | 99.95         | 0.05            | 99.78          | 99.91         | 0.09            | 12636       | 9406             |
| 449920A12_2010-11-19_GMLE_532 | GMLE   | 99.8      | 99.92    | 0.08       | 99.81          | 99.95         | 0.05            | 99.78          | 99.84         | 0.16            | 12636       | 9406             |
| 449921A01_2010-11-19_GMLE_532 | GMLE   | 99.83     | 99.94    | 0.06       | 99.85          | 99.96         | 0.04            | 99.78          | 99.88         | 0.12            | 12636       | 9406             |
| 449921A02_2010-11-19_GMLE_532 | GMLE   | 99.43     | 99.9     | 0.1        | 99.4           | 99.95         | 0.05            | 99.5           | 99.75         | 0.25            | 12636       | 9406             |
| 449921A03_2010-11-19_GMLE_532 | GMLE   | 99.84     | 99.93    | 0.07       | 99.83          | 99.95         | 0.05            | 99.88          | 99.88         | 0.12            | 12636       | 9406             |
| 449921A04_2010-11-19_GMLE_532 | GMLE   | 99.63     | 99.92    | 0.08       | 99.62          | 99.95         | 0.05            | 99.66          | 99.84         | 0.16            | 12636       | 9406             |
| 449921A05_2010-11-19_GMLE_532 | GMLE   | 99.83     | 99.93    | 0.07       | 99.85          | 99.95         | 0.05            | 99.75          | 99.88         | 0.12            | 12636       | 9406             |
| 449921A06_2010-11-19_GMLE_532 | GMLE   | 99.66     | 99.91    | 0.09       | 99.66          | 99.93         | 0.07            | 99.66          | 99.88         | 0.12            | 12636       | 9406             |
| 449921A07_2010-11-19_GMLE_532 | GMLE   | 99.9      | 99.94    | 0.06       | 99.9           | 99.96         | 0.04            | 99.88          | 99.88         | 0.12            | 12636       | 9406             |
| 449921A08_2010-11-19_GMLE_532 | GMLE   | 99.64     | 99.9     | 0.1        | 99.66          | 99.91         | 0.09            | 99.57          | 99.84         | 0.16            | 12636       | 9406             |
| 449921A09_2010-11-19_GMLE_532 | GMLE   | 99.88     | 99.92    | 0.08       | 99.89          | 99.95         | 0.05            | 99.85          | 99.84         | 0.16            | 12636       | 9406             |
| 449921A10_2010-11-19_GMLE_532 | GMLE   | 96.3      | 99.47    | 0.53       | 96.13          | 99.46         | 0.54            | 96.81          | 99.49         | 0.51            | 12636       | 9406             |
| 449921A11_2010-11-19_GMLE_532 | GMLE   | 99.81     | 99.93    | 0.07       | 99.82          | 99.96         | 0.04            | 99.78          | 99.84         | 0.16            | 12636       | 9406             |
| 449921A12_2010-11-19_GMLE_532 | GMLE   | 99.65     | 99.92    | 0.08       | 99.68          | 99.94         | 0.06            | 99.57          | 99.88         | 0.12            | 12636       | 9406             |
| 449922A01_2010-11-22_GMLE_532 | GMLE   | 99.44     | 99.95    | 0.05       | 99.47          | 99.96         | 0.04            | 99.35          | 99.94         | 0.06            | 12636       | 9406             |
| 449922A02_2010-11-22_GMLE_532 | GMLE   | 98.82     | 99.48    | 0.52       | 98.66          | 99.42         | 0.58            | 99.29          | 99.66         | 0.34            | 12636       | 9406             |
| 449922A03_2010-11-22_GMLE_532 | GMLE   | 99.79     | 99.93    | 0.07       | 99.78          | 99.96         | 0.04            | 99.85          | 99.84         | 0.16            | 12636       | 9406             |
| 449922A04_2010-11-22_GMLE_532 | GMLE   | 99.72     | 99.94    | 0.06       | 99.72          | 99.96         | 0.04            | 99.72          | 99.88         | 0.12            | 12636       | 9406             |
| 449922A05_2010-11-22_GMLE_532 | GMLE   | 99.78     | 99.93    | 0.07       | 99.81          | 99.95         | 0.05            | 99.69          | 99.88         | 0.12            | 12636       | 9406             |
| 449922A06_2010-11-22_GMLE_532 | GMLE   | 99.69     | 99.94    | 0.06       | 99.68          | 99.97         | 0.03            | 99.72          | 99.88         | 0.12            | 12636       | 9406             |
| 449922A07_2010-11-22_GMLE_532 | GMLE   | 99.83     | 99.94    | 0.06       | 99.84          | 99.95         | 0.05            | 99.78          | 99.91         | 0.09            | 12636       | 9406             |
| 449922A08_2010-11-22_GMLE_532 | GMLE   | 99.8      | 99.94    | 0.06       | 99.79          | 99.96         | 0.04            | 99.85          | 99.91         | 0.09            | 12636       | 9406             |
| 449922A09_2010-11-22_GMLE_532 | GMLE   | 99.8      | 99.94    | 0.06       | 99.84          | 99.95         | 0.05            | 99.69          | 99.91         | 0.09            | 12636       | 9406             |
| 449922A10_2010-11-22_GMLE_532 | GMLE   | 99.76     | 99.91    | 0.09       | 99.78          | 99.91         | 0.09            | 99.72          | 99.91         | 0.09            | 12636       | 9406             |
| 449922A11_2010-11-22_GMLE_532 | GMLE   | 99.79     | 99.94    | 0.06       | 99.8           | 99.96         | 0.04            | 99.78          | 99.88         | 0.12            | 12636       | 9406             |
| 449922A12_2010-11-22_GMLE_532 | GMLE   | 99.79     | 99.92    | 0.08       | 99.8           | 99.93         | 0.07            | 99.78          | 99.91         | 0.09            | 12636       | 9406             |
| 450124A03_GMLE_532            | GMLE   | 99.45     | 99.94    | 0.06       | 99.38          | 99.97         | 0.03            | 99.63          | 99.88         | 0.12            | 12636       | 9406             |
| 450124A05_GMLE_532            | GMLE   | 99.37     | 99.88    | 0.12       | 99.33          | 99.91         | 0.09            | 99.47          | 99.78         | 0.22            | 12636       | 9406             |
| 450124A06_GMLE_532            | GMLE   | 99.41     | 99.9     | 0.1        | 99.37          | 99.94         | 0.06            | 99.5           | 99.81         | 0.19            | 12636       | 9406             |
| 450124A08_GMLE_532            | GMLE   | 99.67     | 99.93    | 0.07       | 99.61          | 99.95         | 0.05            | 99.85          | 99.88         | 0.12            | 12636       | 9406             |
| 450124A10_GMLE_532            | GMLE   | 99.6      | 99.92    | 0.08       | 99.53          | 99.93         | 0.07            | 99.78          | 99.91         | 0.09            | 12636       | 9406             |
| 457035A01_2010-11-18_GMLE_532 | GMLE   | 99.68     | 99.94    | 0.06       | 99.77          | 99.97         | 0.03            | 99.44          | 99.84         | 0.16            | 12636       | 9406             |
| 457035A02_2010-11-18_GMLE_532 | GMLE   | 99.49     | 99.91    | 0.09       | 99.54          | 99.93         | 0.07            | 99.35          | 99.88         | 0.12            | 12636       | 9406             |
| 457035A03_2010-11-18_GMLE_532 | GMLE   | 99.82     | 99.94    | 0.06       | 99.8           | 99.96         | 0.04            | 99.88          | 99.88         | 0.12            | 12636       | 9406             |
| 457035A04_2010-11-18_GMLE_532 | GMLE   | 99.8      | 99.9     | 0.1        | 99.83          | 99.91         | 0.09            | 99.72          | 99.84         | 0.16            | 12636       | 9406             |
| 457035A05_2010-11-18_GMLE_532 | GMLE   | 99.79     | 99.92    | 0.08       | 99.79          | 99.95         | 0.05            | 99.81          | 99.84         | 0.16            | 12636       | 9406             |
| 457035A06_2010-11-18_GMLE_532 | GMLE   | 99.83     | 99.92    | 0.08       | 99.83          | 99.95         | 0.05            | 99.81          | 99.84         | 0.16            | 12636       | 9406             |
| 457035A07_2010-11-18_GMLE_532 | GMLE   | 99.87     | 99.93    | 0.07       | 99.89          | 99.95         | 0.05            | 99.81          | 99.88         | 0.12            | 12636       | 9406             |
| 457035A08_2010-11-18_GMLE_532 | GMLE   | 99.79     | 99.94    | 0.06       | 99.8           | 99.96         | 0.04            | 99.78          | 99.88         | 0.12            | 12636       | 9406             |
| 457035A09_2010-11-18_GMLE_532 | GMLE   | 99.85     | 99.92    | 0.08       | 99.85          | 99.96         | 0.04            | 99.85          | 99.81         | 0.19            | 12636       | 9406             |
| 457035A10_2010-11-18_GMLE_532 | GMLE   | 99.87     | 99.91    | 0.09       | 99.89          | 99.93         | 0.07            | 99.81          | 99.88         | 0.12            | 12636       | 9406             |
| 457035A11_2010-11-18_GMLE_532 | GMLE   | 99.9      | 99.94    | 0.06       | 99.91          | 99.96         | 0.04            | 99.85          | 99.88         | 0.12            | 12636       | 9406             |
| 457035A12_2010-11-18_GMLE_532 | GMLE   | 99.89     | 99.91    | 0.09       | 99.9           | 99.91         | 0.09            | 99.85          | 99.91         | 0.09            | 12636       | 9406             |
| Mean                          | GMLE   | 99.647    | 99.907   | 0.093      | 99.64          | 99.92         | 0.075           | 99.66          | 99.86         | 0.138           | 12636       | 9406             |
| SE                            | GMLE   | 0.0704    | 0.0123   | 0.012      | 0.075          | 0.014         | 0.014           | 0.059          | 0.01          | 0.01            | 0           | 0                |

| IMAGE_ID                      | NR_REF_SNPs_POOR | MEAN_DISCRIM_SCOR | MEAN_DISCRIM_HET | MEAN_INTENS_MAJOR | MEAN_INTENS_MINOR | NR_SNPs_AA | NR_SNPs_AB | NR_SNPs_BB | NR_SNPs_NoCall |
|-------------------------------|------------------|-------------------|------------------|-------------------|-------------------|------------|------------|------------|----------------|
| 449920A01_2010-11-19_GMLE_532 | 3230             | 12.33             | 1.15             | 2542              | 256.4             | 5034       | 159        | 7403       | 40             |
| 449920A02_2010-11-19_GMLE_532 | 3230             | 11.77             | 1.17             | 2572              | 269.2             | 5036       | 159        | 7400       | 41             |
| 449920A03_2010-11-19_GMLE_532 | 3230             | 10.41             | 1.15             | 2434              | 266               | 5033       | 161        | 7399       | 43             |
| 449920A04_2010-11-19_GMLE_532 | 3230             | 11.12             | 1.18             | 2580              | 270.1             | 5035       | 169        | 7398       | 34             |
| 449920A05_2010-11-19_GMLE_532 | 3230             | 13.24             | 1.17             | 2519              | 239.9             | 5034       | 159        | 7401       | 42             |
| 449920A06_2010-11-19_GMLE_532 | 3230             | 12.24             | 1.15             | 2528              | 252.1             | 5035       | 167        | 7399       | 35             |
| 449920A08_2010-11-19_GMLE_532 | 3230             | 13.77             | 1.17             | 2586              | 236.4             | 5033       | 179        | 7399       | 25             |
| 449920A09_2010-11-19_GMLE_532 | 3230             | 14.18             | 1.18             | 2542              | 229               | 5034       | 180        | 7399       | 23             |
| 449920A10_2010-11-19_GMLE_532 | 3230             | 13.15             | 1.17             | 2537              | 240.7             | 5033       | 171        | 7399       | 33             |
| 449920A11_2010-11-19_GMLE_532 | 3230             | 14.45             | 1.17             | 2529              | 226.8             | 5033       | 181        | 7400       | 22             |
| 449920A12_2010-11-19_GMLE_532 | 3230             | 14.24             | 1.16             | 2538              | 228.6             | 5035       | 176        | 7400       | 25             |
| 449921A01_2010-11-19_GMLE_532 | 3230             | 13.24             | 1.16             | 2534              | 245.1             | 5034       | 183        | 7398       | 21             |
| 449921A02_2010-11-19_GMLE_532 | 3230             | 7.56              | 1.22             | 2664              | 380.5             | 5021       | 166        | 7377       | 72             |
| 449921A03_2010-11-19_GMLE_532 | 3230             | 14.24             | 1.17             | 2373              | 210.7             | 5033       | 182        | 7401       | 20             |
| 449921A04_2010-11-19_GMLE_532 | 3230             | 12.7              | 1.17             | 2516              | 254.9             | 5033       | 155        | 7401       | 47             |
| 449921A05_2010-11-19_GMLE_532 | 3230             | 14.46             | 1.17             | 2586              | 225.3             | 5034       | 180        | 7400       | 22             |
| 449921A06_2010-11-19_GMLE_532 | 3230             | 9.75              | 1.15             | 2585              | 302.1             | 5033       | 160        | 7400       | 43             |
| 449921A07_2010-11-19_GMLE_532 | 3230             | 15.39             | 1.18             | 2535              | 211.2             | 5033       | 190        | 7400       | 13             |
| 449921A08_2010-11-19_GMLE_532 | 3230             | 12.42             | 1.15             | 2538              | 258.4             | 5035       | 153        | 7402       | 46             |
| 449921A09_2010-11-19_GMLE_532 | 3230             | 15.29             | 1.17             | 2506              | 214.9             | 5034       | 186        | 7401       | 15             |
| 449921A10_2010-11-19_GMLE_532 | 3230             | 11.1              | 1.48             | 2685              | 293.9             | 4897       | 16         | 7256       | 467            |
| 449921A11_2010-11-19_GMLE_532 | 3230             | 14.89             | 1.15             | 2576              | 227.3             | 5034       | 178        | 7400       | 24             |
| 449921A12_2010-11-19_GMLE_532 | 3230             | 11.73             | 1.17             | 2583              | 273.2             | 5033       | 158        | 7401       | 44             |
| 449922A01_2010-11-22_GMLE_532 | 3230             | 7.18              | 1.17             | 2773              | 405               | 5028       | 146        | 7391       | 71             |
| 449922A02_2010-11-22_GMLE_532 | 3230             | 9.65              | NA               | 2663              | 315.7             | 5059       | 0          | 7428       | 149            |
| 449922A03_2010-11-22_GMLE_532 | 3230             | 12.31             | 1.16             | 2370              | 230.8             | 5034       | 176        | 7400       | 26             |
| 449922A04_2010-11-22_GMLE_532 | 3230             | 11.65             | 1.17             | 2538              | 258.1             | 5035       | 169        | 7397       | 35             |
| 449922A05_2010-11-22_GMLE_532 | 3230             | 13.26             | 1.18             | 2507              | 234.1             | 5035       | 175        | 7398       | 28             |
| 449922A06_2010-11-22_GMLE_532 | 3230             | 12.01             | 1.16             | 2537              | 254.9             | 5034       | 166        | 7397       | 39             |
| 449922A07_2010-11-22_GMLE_532 | 3230             | 13.8              | 1.18             | 2515              | 228.3             | 5033       | 181        | 7400       | 22             |
| 449922A08_2010-11-22_GMLE_532 | 3230             | 13.03             | 1.18             | 2371              | 220.6             | 5032       | 180        | 7399       | 25             |
| 449922A09_2010-11-22_GMLE_532 | 3230             | 13.5              | 1.16             | 2501              | 228.6             | 5034       | 178        | 7399       | 25             |
| 449922A10_2010-11-22_GMLE_532 | 3230             | 12.65             | 1.18             | 2533              | 240.2             | 5035       | 171        | 7400       | 30             |
| 449922A11_2010-11-22_GMLE_532 | 3230             | 14.09             | 1.17             | 2497              | 221.5             | 5033       | 177        | 7400       | 26             |
| 449922A12_2010-11-22_GMLE_532 | 3230             | 14.59             | 1.18             | 2520              | 219.4             | 5035       | 175        | 7400       | 26             |
| 450124A03_GMLE_532            | 3230             | 9.88              | 1.18             | 2403              | 289.9             | 5002       | 204        | 7360       | 70             |
| 450124A05_GMLE_532            | 3230             | 12.79             | 1.16             | 2512              | 282.9             | 5028       | 129        | 7399       | 80             |
| 450124A06_GMLE_532            | 3230             | 12.24             | 1.16             | 2466              | 282.5             | 5028       | 139        | 7394       | 75             |
| 450124A08_GMLE_532            | 3230             | 10.17             | 1.15             | 2475              | 303.4             | 5035       | 160        | 7399       | 42             |
| 450124A10_GMLE_532            | 3230             | 12.22             | 1.14             | 2451              | 270.8             | 5035       | 153        | 7397       | 51             |
| 457035A01_2010-11-18_GMLE_532 | 3230             | 11.92             | 1.18             | 2633              | 277               | 5027       | 183        | 7386       | 40             |
| 457035A02_2010-11-18_GMLE_532 | 3230             | 8.98              | 1.18             | 2841              | 360.6             | 5025       | 158        | 7389       | 64             |
| 457035A03_2010-11-18_GMLE_532 | 3230             | 13.42             | 1.18             | 2567              | 249.6             | 5031       | 187        | 7395       | 23             |
| 457035A04_2010-11-18_GMLE_532 | 3230             | 13.36             | 1.19             | 2661              | 257.7             | 5023       | 196        | 7392       | 25             |
| 457035A05_2010-11-18_GMLE_532 | 3230             | 14.03             | 1.16             | 2632              | 246               | 5030       | 185        | 7395       | 26             |
| 457035A06_2010-11-18_GMLE_532 | 3230             | 13.63             | 1.16             | 2662              | 251.2             | 5031       | 187        | 7396       | 22             |
| 457035A07_2010-11-18_GMLE_532 | 3230             | 14.67             | 1.17             | 2575              | 229.4             | 5032       | 193        | 7395       | 16             |
| 457035A08_2010-11-18_GMLE_532 | 3230             | 14.43             | 1.17             | 2623              | 235.6             | 5031       | 183        | 7396       | 26             |
| 457035A09_2010-11-18_GMLE_532 | 3230             | 15.12             | 1.17             | 2595              | 226.8             | 5032       | 190        | 7395       | 19             |
| 457035A10_2010-11-18_GMLE_532 | 3230             | 13.07             | 1.17             | 2585              | 251.1             | 5031       | 193        | 7396       | 16             |
| 457035A11_2010-11-18_GMLE_532 | 3230             | 16.48             | 1.18             | 2585              | 213.2             | 5032       | 196        | 7395       | 13             |
| 457035A12_2010-11-18_GMLE_532 | 3230             | 15.63             | 1.16             | 2606              | 224.6             | 5029       | 197        | 7396       | 14             |
| Mean                          | 3230             | 12.758            | 1.1747           | 2554              | 256.2             | 5030       | 167.2      | 7395       | 44.63          |
| SE                            | 0                | 0.274             | 0.0063           | 12.4              | 5.646             | 2.749      | 4.948      | 2.937      | 8.885          |

Supplementary Table 7. Somatic SNVs validated by the NimbleGen genotyping platform

| sample | chr | start     | end       | ref | var | geno_N | geno_T | region     | gene     | function | seq_change            |
|--------|-----|-----------|-----------|-----|-----|--------|--------|------------|----------|----------|-----------------------|
| 12586  | 1   | 66485892  | 66485892  | C   | A   | C      | M      | exonic     | PDE4B    | missense | NM_001037340:p.A133E  |
| 12586  | 1   | 114255536 | 114255536 | G   | T   | G      | K      | exonic     | DCLRE1B  | missense | NM_022836:p.D267Y     |
| 12586  | 1   | 246071401 | 246071401 | A   | T   | A      | W      | exonic     | OR11L1   | missense | NM_001001959:p.C141S  |
| 12586  | 1   | 246752378 | 246752378 | C   | A   | C      | M      | exonic     | OR2G6    | missense | NM_001013355:p.Q270K  |
| 12586  | 2   | 37141282  | 37141282  | C   | A   | C      | M      | exonic     | HEATR5B  | missense | NM_019024:p.G599C     |
| 12586  | 2   | 86560909  | 86560909  | A   | T   | A      | W      | exonic     | KDM3A    | missense | NM_018433:p.S809C     |
| 12586  | 2   | 151922470 | 151922470 | C   | T   | C      | Y      | exonic     | TNFAIP6  | missense | NM_007115:p.T151      |
| 12586  | 2   | 170079381 | 170079381 | A   | G   | A      | R      | exonic     | KBTBD10  | missense | NM_006063:p.R388G     |
| 12586  | 2   | 210302827 | 210302827 | C   | T   | C      | Y      | exonic     | MAP2     | missense | NM_002374:p.R1722C    |
| 12586  | 2   | 215591025 | 215591025 | C   | A   | C      | M      | exonic     | ABCA12   | missense | NM_173076:p.R578S     |
| 12586  | 3   | 115553043 | 115553043 | C   | A   | C      | M      | exonic     | ZBTB20   | missense | NM_001164346:p.R118L  |
| 12586  | 3   | 135042829 | 135042829 | G   | C   | G      | S      | exonic     | RAB6B    | nonsense | NM_016577:p.Y93X      |
| 12586  | 4   | 71290299  | 71290299  | G   | T   | G      | K      | UTR3       | SMR3B    | NA       | NA                    |
| 12586  | 4   | 110078433 | 110078433 | G   | T   | G      | K      | exonic     | COL25A1  | missense | NM_032518:p.P230T     |
| 12586  | 4   | 126589539 | 126589539 | G   | A   | G      | R      | exonic     | FAT4     | missense | NM_024582:p.E2640K    |
| 12586  | 5   | 13882800  | 13882800  | G   | C   | G      | S      | exonic     | DNAH5    | missense | NM_001369:p.A2088G    |
| 12586  | 5   | 76206962  | 76206962  | G   | T   | G      | K      | exonic     | S100Z    | missense | NM_130772:p.A8S       |
| 12586  | 5   | 140690593 | 140690593 | G   | T   | G      | K      | exonic     | PCDHGA1  | missense | NM_031993:p.G53V      |
| 12586  | 6   | 29177065  | 29177065  | C   | G   | C      | S      | intergenic | NA       | NA       | NA                    |
| 12586  | 6   | 76769378  | 76769378  | T   | A   | T      | W      | exonic     | IMPG1    | missense | NM_001563:p.D423V     |
| 12586  | 7   | 36160955  | 36160955  | G   | A   | G      | R      | exonic     | EEPD1    | missense | NM_030636:p.R166H     |
| 12586  | 7   | 150341383 | 150341383 | G   | T   | G      | K      | exonic     | NOS3     | nonsense | NM_000603:p.E1080X    |
| 12586  | 8   | 41673173  | 41673173  | G   | T   | G      | K      | exonic     | ANK1     | missense | NM_000037:p.T942K     |
| 12586  | 9   | 119016542 | 119016542 | C   | T   | C      | Y      | exonic     | ASTN2    | missense | NM_014010:p.E311K     |
| 12586  | 10  | 15295965  | 15295965  | C   | A   | C      | M      | exonic     | FAM171A1 | missense | NM_001010924:p.R543L  |
| 12586  | 10  | 26495058  | 26495058  | G   | T   | G      | K      | exonic     | MYO3A    | missense | NM_017433:p.C1019F    |
| 12586  | 10  | 91133979  | 91133979  | C   | A   | C      | M      | exonic     | IFIT1B   | missense | NM_001010987:p.P310H  |
| 12586  | 10  | 100232503 | 100232503 | G   | A   | G      | R      | exonic     | HPSE2    | missense | NM_001166246:p.T498I  |
| 12586  | 10  | 102247416 | 102247416 | C   | G   | C      | S      | exonic     | SEC31B   | missense | NM_015490:p.C663S     |
| 12586  | 10  | 134413041 | 134413041 | G   | T   | G      | K      | exonic     | INPP5A   | missense | NM_005539:p.V255F     |
| 12586  | 11  | 5418896   | 5418896   | C   | G   | C      | S      | exonic     | OR51I1   | missense | NM_001005288:p.R142P  |
| 12586  | 11  | 5558910   | 5558910   | T   | A   | T      | W      | exonic     | OR52B6   | missense | NM_001005162:p.H76Q   |
| 12586  | 11  | 44051592  | 44051592  | A   | G   | A      | R      | exonic     | ACCS     | missense | NM_001127219:p.Q123R  |
| 12586  | 11  | 60848077  | 60848077  | T   | C   | T      | Y      | exonic     | DDB1     | missense | NM_001923:p.M291V     |
| 12586  | 11  | 75846878  | 75846878  | G   | A   | G      | R      | exonic     | C11orf30 | missense | NM_020193:p.M83I      |
| 12586  | 11  | 107711791 | 107711791 | G   | T   | G      | K      | exonic     | ATM      | missense | NM_000051:p.D2721Y    |
| 12586  | 12  | 50568975  | 50568975  | G   | T   | G      | K      | intronic   | ANKRD33  | NA       | NA                    |
| 12586  | 12  | 56252681  | 56252681  | G   | T   | G      | K      | exonic     | KIF5A    | nonsense | NM_004984:p.G541X     |
| 12586  | 12  | 116210333 | 116210333 | G   | T   | G      | K      | exonic     | NOS1     | missense | NM_000620:p.D352E     |
| 12586  | 14  | 64329799  | 64329799  | G   | A   | G      | R      | exonic     | SPTB     | missense | NM_001024858:p.R779W  |
| 12586  | 14  | 85158014  | 85158014  | C   | G   | C      | S      | exonic     | FLRT2    | missense | NM_013231:p.L135V     |
| 12586  | 16  | 21005814  | 21005814  | T   | G   | T      | K      | exonic     | DNAH3    | missense | NM_017539:p.K912Q     |
| 12586  | 17  | 7693679   | 7693679   | G   | T   | G      | K      | exonic     | KDM6B    | missense | NM_001080424:p.E1116D |
| 12586  | 17  | 23898551  | 23898551  | C   | A   | C      | M      | exonic     | UNC119   | missense | NM_005148:p.S205I     |
| 12586  | 17  | 44934502  | 44934502  | C   | A   | C      | M      | exonic     | NGFR     | missense | NM_002507:p.L49M      |
| 12586  | 17  | 45912406  | 45912406  | G   | T   | G      | K      | exonic     | RSAD1    | missense | NM_018346:p.G146W     |
| 12586  | 18  | 29792266  | 29792266  | G   | A   | G      | R      | exonic     | NOLA     | missense | NM_001198548:p.H391Y  |
| 12586  | 18  | 32630865  | 32630865  | C   | A   | C      | M      | exonic     | C18orf10 | missense | NM_015476:p.Q268H     |
| 12586  | 20  | 48629202  | 48629202  | G   | T   | G      | K      | exonic     | PTPN1    | missense | NM_002827:p.D265Y     |
| 12586  | 20  | 55574055  | 55574055  | C   | T   | C      | Y      | exonic     | PCK1     | missense | NM_002591:p.T553M     |
| 12586  | X   | 15522984  | 15522984  | G   | C   | G      | S      | exonic     | ACE2     | missense | NM_021804:p.P84A      |
| 12586  | X   | 18930954  | 18930954  | G   | T   | G      | K      | exonic     | GPR64    | missense | NM_001184836:p.L697M  |
| 12586  | X   | 78313413  | 78313413  | C   | A   | C      | M      | exonic     | GPR174   | missense | NM_032553:p.P85T      |
| 12586  | X   | 125126957 | 125126957 | C   | A   | C      | M      | exonic     | DCAF12L2 | missense | NM_001013628:p.G211V  |
| 12586  | X   | 147862768 | 147862768 | G   | C   | G      | S      | exonic     | AFF2     | missense | NM_001169122:p.D1081H |
| 12820  | 1   | 181054410 | 181054410 | G   | A   | G      | R      | exonic     | NPL      | missense | NM_001200050:p.R171H  |
| 12820  | 1   | 194972683 | 194972683 | A   | T   | A      | W      | exonic     | CFH      | missense | NM_000186:p.Q840H     |
| 12820  | 3   | 148611335 | 148611335 | T   | C   | T      | Y      | exonic     | ZIC1     | missense | NM_003412:p.M249T     |
| 12820  | 5   | 156525535 | 156525535 | C   | T   | C      | Y      | exonic     | FAM71B   | missense | NM_130899:p.V75I      |
| 12820  | 5   | 159991937 | 159991937 | G   | C   | G      | S      | exonic     | ATP10B   | missense | NM_025153:p.T466S     |
| 12820  | 7   | 34854801  | 34854801  | G   | T   | G      | K      | splicing   | NPSR1    | NA       | NA                    |
| 12820  | 11  | 17390860  | 17390860  | G   | C   | G      | S      | exonic     | ABCC8    | missense | NM_000352:p.L829V     |
| 12820  | 12  | 54915666  | 54915666  | C   | A   | C      | M      | exonic     | SLC39A5  | missense | NM_001135195:p.P287Q  |
| 12820  | 17  | 2213567   | 2213567   | G   | T   | G      | K      | exonic     | SGSM2    | missense | NM_014853:p.R244L     |
| 12820  | 17  | 7519119   | 7519119   | T   | C   | T      | Y      | exonic     | TP53     | missense | NM_001126117:p.H47R   |
| 12820  | 17  | 49255984  | 49255984  | C   | A   | C      | M      | exonic     | KIF2B    | missense | NM_032559:p.H197Q     |
| 12820  | 18  | 21060321  | 21060321  | A   | C   | A      | M      | exonic     | ZNF521   | missense | NM_015461:p.M520R     |
| 12820  | 19  | 44590416  | 44590416  | C   | T   | C      | Y      | exonic     | ZFP36    | missense | NM_003407:p.P73L      |
| 12820  | 19  | 47412944  | 47412944  | T   | A   | T      | W      | exonic     | DEDD2    | missense | NM_133328:p.D19V      |
| 12820  | 19  | 52688201  | 52688201  | C   | T   | C      | Y      | exonic     | NAPA     | missense | NM_003827:p.E155K     |
| 12820  | 19  | 53614677  | 53614677  | A   | G   | A      | R      | exonic     | GRIN2D   | missense | NM_000836:p.I629V     |
| 12820  | X   | 65741067  | 65741067  | G   | C   | G      | S      | exonic     | EDA2R    | nonsense | NM_021783:p.Y91X      |
| 12820  | X   | 110442549 | 110442549 | G   | T   | G      | K      | exonic     | DCX      | missense | NM_001195553:p.P340T  |
| 12820  | X   | 142424567 | 142424567 | G   | T   | G      | K      | exonic     | SPANXN3  | missense | NM_001009609:p.L57I   |
| 12924  | 1   | 33843582  | 33843582  | C   | G   | C      | S      | exonic     | CSMD2    | missense | NM_052896:p.G2142A    |
| 12924  | 1   | 202854551 | 202854551 | G   | T   | G      | K      | exonic     | LRRN2    | missense | NM_006338:p.A398E     |

|       |    |           |           |   |   |   |   |          |           |          |                      |
|-------|----|-----------|-----------|---|---|---|---|----------|-----------|----------|----------------------|
| 12924 | 2  | 127900247 | 127900247 | A | T | A | W | exonic   | PROC      | missense | NM_000312:p.T218S    |
| 12924 | 2  | 136291413 | 136291413 | C | T | C | Y | exonic   | LCT       | missense | NM_002299:p.G559S    |
| 12924 | 2  | 201172637 | 201172637 | G | T | G | K | exonic   | AOX1      | missense | NM_001159:p.G120V    |
| 12924 | 3  | 46038131  | 46038131  | G | T | G | K | exonic   | XCR1      | missense | NM_005283:p.L105I    |
| 12924 | 3  | 46374872  | 46374872  | G | T | G | K | exonic   | CCR2      | missense | NM_001123041:p.D284Y |
| 12924 | 3  | 47887307  | 47887307  | C | G | C | S | splicing | MAP4      | silent   | NM_002375:p.R953R    |
| 12924 | 3  | 137528753 | 137528753 | C | A | C | M | exonic   | PCCB      | missense | NM_000532:p.A422E    |
| 12924 | 3  | 166191937 | 166191937 | C | T | C | Y | exonic   | SI        | missense | NM_001041:p.G1669E   |
| 12924 | 3  | 198723629 | 198723629 | C | G | C | S | exonic   | BDH1      | missense | NM_203315:p.R189P    |
| 12924 | 4  | 126592756 | 126592756 | G | T | G | K | exonic   | FAT4      | missense | NM_024582:p.S3712I   |
| 12924 | 4  | 145848821 | 145848821 | C | A | C | M | exonic   | HHIP      | missense | NM_022475:p.N403K    |
| 12924 | 4  | 164613809 | 164613809 | C | G | C | S | exonic   | TKTL2     | missense | NM_032136:p.L176F    |
| 12924 | 5  | 24523857  | 24523857  | G | C | G | S | exonic   | CDH10     | missense | NM_001190450:p.A250G |
| 12924 | 5  | 152853684 | 152853684 | G | C | G | S | exonic   | GRIA1     | missense | NM_000827:p.G29A     |
| 12924 | 5  | 169466096 | 169466096 | G | T | G | K | exonic   | FOXI1     | missense | NM_144769:p.R186L    |
| 12924 | 6  | 29473063  | 29473063  | C | A | C | M | exonic   | OR12D2    | missense | NM_013936:p.T203K    |
| 12924 | 6  | 33025633  | 33025633  | C | A | C | M | exonic   | HLA-DMA   | missense | NM_006120:p.A129S    |
| 12924 | 6  | 43751113  | 43751113  | C | A | C | M | intronic | MRPS18A   | NA       | NA                   |
| 12924 | 6  | 132980509 | 132980509 | C | A | C | M | exonic   | TAAR2     | missense | NM_001033080:p.G177W |
| 12924 | 7  | 36638166  | 36638166  | C | T | C | Y | splicing | AOAH      | NA       | NA                   |
| 12924 | 7  | 156219709 | 156219709 | A | G | A | R | exonic   | LMBR1     | missense | NM_022458:p.L254P    |
| 12924 | 8  | 19863964  | 19863964  | G | A | G | R | exonic   | LPL       | missense | NM_000237:p.V461I    |
| 12924 | 8  | 23051360  | 23051360  | C | A | C | M | exonic   | TNFRSF10D | missense | NM_003840:p.D377Y    |
| 12924 | 8  | 73104745  | 73104745  | A | T | A | W | exonic   | TRPA1     | missense | NM_007332:p.V961D    |
| 12924 | 8  | 87311127  | 87311127  | G | T | G | K | exonic   | SLC7A13   | missense | NM_138817:p.L166M    |
| 12924 | 8  | 111054016 | 111054016 | C | A | C | M | exonic   | KCNV1     | missense | NM_014379:p.G213V    |
| 12924 | 8  | 131931118 | 131931118 | C | G | C | S | exonic   | ADCY8     | missense | NM_001115:p.C775S    |
| 12924 | 8  | 134176567 | 134176567 | C | A | C | M | exonic   | TG        | missense | NM_003235:p.S2446Y   |
| 12924 | 9  | 98054994  | 98054994  | A | T | A | W | exonic   | HSD17B3   | missense | NM_000197:p.S99R     |
| 12924 | 9  | 139578715 | 139578715 | T | A | T | W | exonic   | WDR85     | missense | NM_138778:p.K314M    |
| 12924 | 10 | 6546296   | 6546296   | T | A | T | W | exonic   | PRKCQ     | missense | NM_006257:p.D477V    |
| 12924 | 10 | 69572807  | 69572807  | C | A | C | M | exonic   | MYPN      | missense | NM_032578:p.T336K    |
| 12924 | 10 | 70695406  | 70695406  | C | A | C | M | exonic   | HKDC1     | missense | NM_025130:p.T811K    |
| 12924 | 10 | 99351673  | 99351673  | G | A | G | R | exonic   | DHDPSL    | missense | NM_138413:p.C257Y    |
| 12924 | 10 | 134874980 | 134874980 | G | T | G | K | exonic   | KNDC1     | missense | NM_152643:p.A1325S   |
| 12924 | 11 | 5755928   | 5755928   | C | A | C | M | exonic   | OR52N5    | missense | NM_001001922:p.L171F |
| 12924 | 11 | 13335039  | 13335039  | C | A | C | M | intronic | ARNTL     | NA       | NA                   |
| 12924 | 11 | 88551511  | 88551511  | A | C | A | M | exonic   | TYR       | missense | NM_000372:p.T248P    |
| 12924 | 11 | 92354351  | 92354351  | G | T | G | K | exonic   | MTNR1B    | missense | NM_005959:p.G105V    |
| 12924 | 11 | 133618399 | 133618399 | G | C | G | S | splicing | VPS26B    | NA       | NA                   |
| 12924 | 12 | 50570772  | 50570772  | T | A | T | W | exonic   | ANKRD33   | missense | NM_001130015:p.Y134N |
| 12924 | 12 | 79763775  | 79763775  | T | A | T | W | exonic   | LIN7A     | missense | NM_004664:p.E116D    |
| 12924 | 12 | 81775077  | 81775077  | G | A | G | R | exonic   | TMTC2     | missense | NM_152588:p.G81R     |
| 12924 | 12 | 119060141 | 119060141 | G | A | G | R | exonic   | GCN1L1    | missense | NM_006836:p.P2114S   |
| 12924 | 13 | 25049222  | 25049222  | G | A | G | R | exonic   | ATP8A2    | missense | NM_016529:p.M576I    |
| 12924 | 13 | 38348391  | 38348391  | G | T | G | K | exonic   | FREM2     | missense | NM_207361:p.D2806Y   |
| 12924 | 13 | 38349381  | 38349381  | G | T | G | K | splicing | FREM2     | NA       | NA                   |
| 12924 | 13 | 98137885  | 98137885  | C | G | C | S | exonic   | SLC15A1   | missense | NM_005073:p.C593S    |
| 12924 | 13 | 100512332 | 100512332 | G | A | G | R | exonic   | NALCN     | missense | NM_052867:p.R1582C   |
| 12924 | 14 | 22956241  | 22956241  | G | A | G | R | exonic   | MYH7      | missense | NM_000257:p.H1494Y   |
| 12924 | 14 | 69314997  | 69314997  | C | T | C | Y | exonic   | SLC10A1   | missense | NM_003049:p.C250Y    |
| 12924 | 14 | 94025772  | 94025772  | T | C | T | Y | exonic   | SERPINA12 | missense | NM_173850:p.I331V    |
| 12924 | 14 | 98252409  | 98252409  | G | T | G | K | exonic   | C14orf177 | missense | NM_182560:p.S43I     |
| 12924 | 16 | 4768002   | 4768002   | T | A | T | W | splicing | 41164     | NA       | NA                   |
| 12924 | 16 | 54465390  | 54465390  | A | C | A | M | exonic   | CES7      | missense | NM_001190158:p.V74G  |
| 12924 | 16 | 56158919  | 56158919  | G | C | G | S | exonic   | GPR114    | missense | NM_153837:p.A246P    |
| 12924 | 17 | 1465068   | 1465068   | C | T | C | Y | exonic   | SLC43A2   | missense | NM_152346:p.A127T    |
| 12924 | 17 | 15905731  | 15905731  | G | A | G | R | exonic   | NCOR1     | nonsense | NM_006311:p.Q1864X   |
| 12924 | 18 | 30652190  | 30652190  | C | G | C | S | exonic   | DTNA      | missense | NM_001128175:p.C258W |
| 12924 | 19 | 6630508   | 6630508   | C | A | C | M | splicing | C3        | NA       | NA                   |
| 12924 | 19 | 10471422  | 10471422  | G | C | G | S | exonic   | KEAP1     | missense | NM_012289:p.H96Q     |
| 12924 | 19 | 12619281  | 12619281  | G | T | G | K | exonic   | MAN2B1    | missense | NM_000528:p.S932R    |
| 12924 | 19 | 19232687  | 19232687  | C | T | C | Y | exonic   | HAPLN4    | missense | NM_023002:p.R140H    |
| 12924 | 19 | 61394027  | 61394027  | T | A | T | W | exonic   | ZSCAN5B   | nonsense | NM_001080456:p.K244X |
| 12924 | 20 | 2359613   | 2359613   | T | A | T | W | exonic   | TGM6      | missense | NM_198994:p.V636E    |
| 12924 | 20 | 24942664  | 24942664  | G | T | G | K | exonic   | ACSS1     | missense | NM_032501:p.A462E    |
| 12924 | 21 | 43774123  | 43774123  | C | T | C | Y | exonic   | HSF2BP    | missense | NM_007031:p.R315H    |
| 12924 | 21 | 44212356  | 44212356  | C | A | C | M | exonic   | AGPAT3    | missense | NM_001037553:p.L94I  |
| 12924 | X  | 16080634  | 16080634  | C | G | C | S | exonic   | GRPR      | missense | NM_005314:p.S367C    |
| 12924 | X  | 41087939  | 41087939  | G | T | G | K | exonic   | DDX3X     | nonsense | NM_001193416:p.G229X |
| 12924 | X  | 46954012  | 46954012  | A | T | A | W | exonic   | UBA1      | missense | NM_003334:p.N662I    |
| 12924 | X  | 70389164  | 70389164  | C | A | C | M | splicing | ZMYM3     | nonsense | NM_001171163:p.G223X |
| 12924 | X  | 133984040 | 133984040 | C | T | C | Y | exonic   | FAM127C   | missense | NM_001078173:p.R39Q  |
| 12924 | X  | 153388977 | 153388977 | C | A | C | M | exonic   | FAM3A     | nonsense | NM_001171133:p.E104X |
| 13280 | 1  | 31210269  | 31210269  | G | A | G | R | exonic   | PUM1      | missense | NM_014676:p.S721L    |
| 13280 | 1  | 42976740  | 42976740  | G | T | G | K | exonic   | CLDN19    | missense | NM_001185117:p.D109E |
| 13280 | 1  | 93374877  | 93374877  | T | C | T | Y | exonic   | MTF2      | missense | NM_001164392:p.L439S |
| 13280 | 1  | 94270130  | 94270130  | C | G | C | S | exonic   | ABCA4     | missense | NM_000350:p.R1307T   |
| 13280 | 1  | 153280704 | 153280704 | C | T | C | Y | exonic   | DCST1     | missense | NM_152494:p.N247Y    |

|       |    |           |           |   |   |   |   |          |          |          |                       |
|-------|----|-----------|-----------|---|---|---|---|----------|----------|----------|-----------------------|
| 13280 | 1  | 154831952 | 154831952 | C | T | C | Y | exonic   | GPATCH4  | missense | NM_015590:p.E269K     |
| 13280 | 1  | 157180366 | 157180366 | A | G | A | R | exonic   | PYHIN1   | missense | NM_198929:p.M389V     |
| 13280 | 1  | 178507237 | 178507237 | G | A | G | R | exonic   | LHX4     | missense | NM_033343:p.R184Q     |
| 13280 | 2  | 64175776  | 64175776  | T | C | T | Y | exonic   | PEL1     | missense | NM_020651:p.E274G     |
| 13280 | 2  | 74609738  | 74609738  | G | T | G | K | intronic | AUP1     | NA       | NA                    |
| 13280 | 2  | 98821013  | 98821013  | C | G | C | S | splicing | C2orf55  | NA       | NA                    |
| 13280 | 2  | 105258550 | 105258550 | G | C | G | S | exonic   | TGFBRAP1 | missense | NM_001142621:p.R522G  |
| 13280 | 3  | 15617957  | 15617957  | G | T | G | K | exonic   | HACL1    | missense | NM_012260:p.F6L       |
| 13280 | 3  | 32907330  | 32907330  | C | G | C | S | exonic   | TRIM71   | missense | NM_001039111:p.Q544E  |
| 13280 | 3  | 128823195 | 128823195 | G | T | G | K | splicing | MCM2     | NA       | NA                    |
| 13280 | 4  | 39085349  | 39085349  | G | A | G | R | exonic   | KLB      | missense | NM_175737:p.D129N     |
| 13280 | 4  | 119956108 | 119956108 | G | T | G | K | exonic   | SEC24D   | missense | NM_014822:p.Q207K     |
| 13280 | 4  | 189161599 | 189161599 | G | T | G | K | exonic   | ZFP42    | missense | NM_174900:p.R215L     |
| 13280 | 5  | 878334    | 878334    | T | A | T | W | exonic   | ZDHHC11  | missense | NM_024786:p.K323M     |
| 13280 | 5  | 41417931  | 41417931  | T | C | T | Y | exonic   | PLCXD3   | missense | NM_001005473:p.Y189C  |
| 13280 | 5  | 121215873 | 121215873 | G | T | G | K | exonic   | FTMT     | missense | NM_177478:p.V106L     |
| 13280 | 5  | 141013735 | 141013735 | G | C | G | S | exonic   | ARAP3    | missense | NM_022481:p.T1534S    |
| 13280 | 6  | 90430930  | 90430930  | G | T | G | K | exonic   | MDN1     | missense | NM_014611:p.Q4745K    |
| 13280 | 7  | 75797441  | 75797441  | G | T | G | K | exonic   | YWHAG    | missense | NM_012479:p.L45M      |
| 13280 | 7  | 117219239 | 117219239 | G | T | G | K | exonic   | CTTNBP2  | missense | NM_033427:p.A416D     |
| 13280 | 7  | 123304420 | 123304420 | C | T | C | Y | exonic   | HYAL4    | missense | NM_012269:p.A474V     |
| 13280 | 8  | 26777838  | 26777838  | G | A | G | R | exonic   | ADRA1A   | missense | NM_033303:p.A189V     |
| 13280 | 8  | 124264458 | 124264458 | G | A | G | R | exonic   | FAM83A   | missense | NM_032899:p.D61N      |
| 13280 | 9  | 135434062 | 135434062 | G | T | G | K | exonic   | FAM163B  | missense | NM_001080515:p.G135D  |
| 13280 | 9  | 137782699 | 137782699 | G | A | G | R | exonic   | KCNT1    | missense | NM_020822:p.G142D     |
| 13280 | 10 | 45227665  | 45227665  | G | C | G | S | exonic   | ALOX5    | missense | NM_000698:p.G151A     |
| 13280 | 11 | 6189563   | 6189563   | C | A | C | M | exonic   | FAM160A2 | nonsense | NM_032127:p.G904X     |
| 13280 | 11 | 14471812  | 14471812  | T | G | T | K | exonic   | COPB1    | missense | NM_016451:p.H148P     |
| 13280 | 11 | 33265498  | 33265498  | C | G | C | S | exonic   | HIPK3    | missense | NM_005734:p.A321G     |
| 13280 | 11 | 85122763  | 85122763  | A | T | A | W | exonic   | SYTL2    | missense | NM_001162953:p.N419K  |
| 13280 | 11 | 123946143 | 123946143 | T | A | T | W | exonic   | OR8A1    | silent   | NM_001005194:p.G323G  |
| 13280 | 12 | 51934113  | 51934113  | C | T | C | Y | exonic   | MFSD5    | silent   | NM_001170790:p.F516F  |
| 13280 | 12 | 100113060 | 100113060 | C | G | C | S | exonic   | SLC5A8   | missense | NM_145913:p.D161H     |
| 13280 | 13 | 38495234  | 38495234  | G | A | G | R | exonic   | C13orf23 | missense | NM_170719:p.P178S     |
| 13280 | 13 | 114028535 | 114028535 | A | G | A | R | exonic   | CD16     | missense | NM_003903:p.N279S     |
| 13280 | 14 | 24045588  | 24045588  | A | T | A | W | exonic   | CMA1     | missense | NM_001836:p.L91H      |
| 13280 | 15 | 71676430  | 71676430  | A | G | A | R | exonic   | NPTN     | missense | NM_001161363:p.I142T  |
| 13280 | 16 | 20399439  | 20399439  | G | T | G | K | exonic   | ACSM2A   | missense | NM_001010845:p.W442L  |
| 13280 | 17 | 26600139  | 26600139  | C | G | C | S | exonic   | NF1      | nonsense | NM_001042492:p.S1329X |
| 13280 | 17 | 70461845  | 70461845  | C | A | C | M | exonic   | C17orf28 | missense | NM_030630:p.S616I     |
| 13280 | 17 | 71459246  | 71459246  | C | G | C | S | exonic   | ACOX1    | missense | NM_001185039:p.E280Q  |
| 13280 | 18 | 27871231  | 27871231  | G | C | G | S | splicing | RNF125   | NA       | NA                    |
| 13280 | 19 | 16868069  | 16868069  | A | C | A | M | exonic   | CPAMD8   | missense | NM_015692:p.L1829V    |
| 13280 | 19 | 40492838  | 40492838  | C | A | C | M | exonic   | MAG      | missense | NM_080600:p.R485S     |
| 13280 | 19 | 42817788  | 42817788  | T | A | T | W | exonic   | ZFP30    | missense | NM_014898:p.E498D     |
| 13280 | 19 | 50255515  | 50255515  | G | C | G | S | exonic   | CLASRP   | missense | NM_007056:p.E247Q     |
| 13280 | 19 | 53034920  | 53034920  | A | T | A | W | exonic   | CRX      | missense | NM_000554:p.S262C     |
| 13280 | 19 | 63144458  | 63144458  | C | G | C | S | exonic   | ZNF256   | missense | NM_005773:p.Q510H     |
| 13280 | 19 | 63464456  | 63464456  | G | C | G | S | exonic   | ZNF544   | missense | NM_014480:p.Q224H     |
| 13280 | 22 | 22510575  | 22510575  | G | A | G | R | exonic   | DERL3    | silent   | NM_001135751:p.F97F   |
| 13280 | 22 | 29661039  | 29661039  | G | A | G | R | exonic   | MORC2    | missense | NM_014941:p.P579L     |
| 13280 | X  | 12537853  | 12537853  | A | G | A | R | exonic   | FRMPD4   | missense | NM_014728:p.D84G      |
| 13280 | X  | 47372558  | 47372558  | G | C | G | S | exonic   | CFP      | missense | NM_002621:p.S97C      |
| 13280 | X  | 48936733  | 48936733  | C | A | C | M | exonic   | SYP      | missense | NM_003179:p.Q185H     |
| 13280 | X  | 53240957  | 53240957  | C | T | C | Y | exonic   | KDM5C    | missense | NM_001146702:p.D1040N |
| 13280 | X  | 55050120  | 55050120  | C | G | C | S | exonic   | APEX2    | missense | NM_014481:p.Q362E     |
| 13280 | X  | 100012386 | 100012386 | T | C | T | Y | exonic   | NOX1     | missense | NM_013955:p.Y40C      |
| 13280 | X  | 117584044 | 117584044 | T | G | T | K | exonic   | DOCK11   | missense | NM_144658:p.Y248D     |
| 13280 | X  | 117584105 | 117584105 | A | T | A | W | exonic   | DOCK11   | missense | NM_144658:p.K268I     |
| 13394 | 1  | 3309278   | 3309278   | G | T | G | K | exonic   | PRDM16   | missense | NM_199454:p.R247L     |
| 13394 | 1  | 33962809  | 33962809  | C | A | C | M | exonic   | CSMD2    | missense | NM_052896:p.A887S     |
| 13394 | 1  | 86736972  | 86736972  | C | A | C | M | exonic   | CLCA1    | missense | NM_001285:p.P748H     |
| 13394 | 1  | 159309233 | 159309233 | C | T | C | Y | exonic   | PVRL4    | missense | NM_030916:p.E459K     |
| 13394 | 1  | 174935263 | 174935263 | G | T | G | K | exonic   | PAPPA2   | missense | NM_020318:p.V1051L    |
| 13394 | 1  | 196163523 | 196163523 | G | T | G | K | exonic   | LHX9     | missense | NM_001014434:p.G296C  |
| 13394 | 3  | 66532150  | 66532150  | A | G | A | R | exonic   | LRIG1    | missense | NM_015541:p.L389P     |
| 13394 | 5  | 37184109  | 37184109  | T | C | T | Y | exonic   | C5orf42  | missense | NM_023073:p.I2744V    |
| 13394 | 6  | 112496248 | 112496248 | T | C | T | Y | exonic   | WISP3    | missense | NM_003880:p.L246P     |
| 13394 | 7  | 34061306  | 34061306  | A | G | A | R | exonic   | BMPER    | missense | NM_133468:p.T265A     |
| 13394 | 9  | 111938576 | 111938576 | G | T | G | K | exonic   | AKAP2    | nonsense | NM_007203:p.E311X     |
| 13394 | 10 | 18294550  | 18294550  | A | G | A | R | exonic   | SLC39A12 | missense | NM_152725:p.N226D     |
| 13394 | 11 | 5211994   | 5211994   | G | T | G | K | exonic   | HBD      | missense | NM_000519:p.Q40K      |
| 13394 | 11 | 10439826  | 10439826  | G | T | G | K | exonic   | AMPD3    | nonsense | NM_000480:p.E71X      |
| 13394 | 11 | 128826458 | 128826458 | C | A | C | M | exonic   | BARX2    | missense | NM_003658:p.P264Q     |
| 13394 | 15 | 71963581  | 71963581  | G | C | G | S | exonic   | TBC1D21  | missense | NM_153356:p.K103N     |
| 13394 | 15 | 83206930  | 83206930  | G | A | G | R | exonic   | ALPK3    | missense | NM_020778:p.C1599Y    |
| 13394 | 15 | 83207845  | 83207845  | G | T | G | K | exonic   | ALPK3    | missense | NM_020778:p.R1692L    |
| 13394 | 16 | 80590705  | 80590705  | G | C | G | S | exonic   | SDR42E1  | missense | NM_145168:p.H232D     |
| 13394 | 17 | 39687558  | 39687558  | T | C | T | Y | splicing | SLC4A1   | NA       | NA                    |



|       |    |           |           |   |   |   |   |            |          |          |                       |
|-------|----|-----------|-----------|---|---|---|---|------------|----------|----------|-----------------------|
| 13394 | 22 | 37554250  | 37554250  | C | T | C | Y | exonic     | NPTXR    | missense | NM_014293:p.E280K     |
| 13542 | 1  | 245836265 | 245836265 | A | T | A | W | exonic     | OR2G3    | missense | NM_001001914:p.Y252F  |
| 13542 | 3  | 141889967 | 141889967 | C | A | C | M | exonic     | TRIM42   | missense | NM_152616:p.Q585K     |
| 13542 | 7  | 100017928 | 100017928 | C | G | C | S | exonic     | LRCH4    | missense | NM_002319:p.R104T     |
| 13542 | 8  | 142223524 | 142223524 | C | G | C | S | exonic     | DENND3   | missense | NM_014957:p.P160R     |
| 13542 | 9  | 129750293 | 129750293 | G | A | G | R | exonic     | FAM102A  | missense | NM_203305:p.P23L      |
| 13542 | 15 | 20513937  | 20513937  | A | T | A | W | exonic     | CYFIP1   | missense | NM_001033028:p.H308L  |
| 13542 | 15 | 75258263  | 75258263  | C | G | C | S | exonic     | PEAK1    | missense | NM_024776:p.E1021Q    |
| 13542 | 16 | 66423859  | 66423859  | C | A | C | M | splicing   | CENPT    | missense | NM_025082:p.R67S      |
| 13542 | 22 | 35290384  | 35290384  | A | T | A | W | exonic     | CACNG2   | missense | NM_006078:p.L311H     |
| 13542 | X  | 65158919  | 65158919  | C | T | C | Y | exonic     | VSIG4    | missense | NM_001100431:p.A277T  |
| 13542 | X  | 135233058 | 135233058 | C | A | C | M | exonic     | GPR112   | missense | NM_153834:p.R176S     |
| 15145 | 3  | 39144894  | 39144894  | C | T | C | Y | exonic     | TTC21A   | missense | NM_145755:p.H538Y     |
| 15145 | 11 | 65376964  | 65376964  | A | C | A | M | exonic     | SNX32    | missense | NM_152760:p.N373H     |
| 15145 | 16 | 16116129  | 16116129  | G | A | G | R | exonic     | ABCC1    | missense | NM_004996:p.A1029T    |
| 15145 | 17 | 39444958  | 39444958  | G | A | G | R | exonic     | TMEM101  | missense | NM_032376:p.P213L     |
| 15145 | 17 | 45630824  | 45630824  | G | A | G | R | exonic     | COL1A1   | missense | NM_000088:p.S171L     |
| 15145 | 18 | 33399469  | 33399469  | G | A | G | R | exonic     | CELF4    | missense | NM_020180:p.T45I      |
| 15145 | 19 | 10461447  | 10461447  | G | A | G | R | exonic     | KEAP1    | missense | NM_012289:p.R470C     |
| 15145 | 19 | 19651295  | 19651295  | A | G | A | R | exonic     | ZNF101   | missense | NM_033204:p.K166R     |
| 15145 | X  | 49029868  | 49029868  | A | C | A | M | exonic     | PPP1R3F  | missense | NM_001184745:p.E245A  |
| 15145 | X  | 109581480 | 109581480 | G | C | G | S | exonic     | RGAG1    | missense | NM_020769:p.V327L     |
| 15145 | X  | 152932908 | 152932908 | C | T | C | Y | exonic     | IRAK1    | missense | NM_001569:p.E440K     |
| 15145 | M  | 15490     | 15490     | A | G | A | R | intergenic | NA       | NA       | NA                    |
| 15822 | 17 | 7623316   | 7623316   | A | C | A | M | exonic     | DNAH2    | missense | NM_020877:p.N1858H    |
| 15858 | 1  | 160234717 | 160234717 | T | G | T | K | exonic     | LOFML2B  | missense | NM_015441:p.E332D     |
| 15858 | 3  | 141764424 | 141764424 | G | T | G | K | exonic     | CLSTN2   | missense | NM_022131:p.R765L     |
| 15858 | 12 | 48635477  | 48635477  | C | A | C | M | exonic     | AQP2     | missense | NM_000486:p.A212D     |
| 15858 | 12 | 123523486 | 123523486 | C | T | C | Y | exonic     | NCOR2    | missense | NM_001077261:p.V186I  |
| 15858 | 19 | 35626600  | 35626600  | C | A | C | M | exonic     | ZNF536   | missense | NM_014717:p.N97K      |
| 16246 | 1  | 20121760  | 20121760  | T | C | T | Y | exonic     | PLA2G2E  | missense | NM_014589:p.Y39C      |
| 16246 | 1  | 145847184 | 145847184 | C | A | C | M | exonic     | GJA8     | missense | NM_005267:p.L160I     |
| 16246 | 1  | 156873075 | 156873075 | C | A | C | M | exonic     | SPTA1    | missense | NM_003126:p.A1764S    |
| 16246 | 1  | 210865913 | 210865913 | C | G | C | S | exonic     | FAM71A   | missense | NM_153606:p.S357R     |
| 16246 | 1  | 246125629 | 246125629 | G | T | G | K | exonic     | OR2W3    | missense | NM_001001957:p.V40L   |
| 16246 | 3  | 1418203   | 1418203   | A | T | A | W | exonic     | CNTN6    | missense | NM_014461:p.N931Y     |
| 16246 | 4  | 119957907 | 119957907 | C | A | C | M | exonic     | SEC24D   | missense | NM_014822:p.Q119H     |
| 16246 | 5  | 33719744  | 33719744  | A | T | A | W | exonic     | ADAMTS12 | missense | NM_030955:p.Y270N     |
| 16246 | 5  | 156522864 | 156522864 | C | A | C | M | exonic     | FAM71B   | missense | NM_130899:p.M330I     |
| 16246 | 7  | 92663108  | 92663108  | A | G | A | R | exonic     | HEPACAM2 | missense | NM_198151:p.V403A     |
| 16246 | 9  | 17399373  | 17399373  | G | T | G | K | exonic     | CNTLN    | nonsense | NM_017738:p.G900X     |
| 16246 | 9  | 35652529  | 35652529  | G | A | G | R | exonic     | C9orf100 | missense | NM_032818:p.P295S     |
| 16246 | 9  | 111745274 | 111745274 | G | T | G | K | exonic     | PALM2    | missense | NM_001037293:p.K296N  |
| 16246 | 10 | 118218695 | 118218695 | C | G | C | S | exonic     | PNLIPRP3 | missense | NM_001011709:p.C312W  |
| 16246 | 11 | 77090162  | 77090162  | T | A | T | W | exonic     | RSF1     | missense | NM_016578:p.K587M     |
| 16246 | 12 | 21856355  | 21856355  | T | A | T | W | exonic     | ABCC9    | missense | NM_020298:p.K1333I    |
| 16246 | 13 | 47839630  | 47839630  | G | T | G | K | splicing   | RB1      | NA       | NA                    |
| 16246 | 14 | 19459043  | 19459043  | G | C | G | S | exonic     | OR4K5    | missense | NM_001005483:p.M146I  |
| 16246 | 14 | 21172217  | 21172217  | C | G | C | S | exonic     | OR10G2   | missense | NM_001005466:p.V208L  |
| 16246 | 20 | 47563101  | 47563101  | G | T | G | K | exonic     | PTGIS    | missense | NM_000961:p.L377M     |
| 16246 | 21 | 46376727  | 46376727  | C | A | C | M | exonic     | COL6A2   | missense | NM_001849:p.R965S     |
| 16246 | X  | 91760002  | 91760002  | G | T | G | K | exonic     | PCDH11X  | missense | NM_032969:p.A1141S    |
| 16246 | X  | 108583482 | 108583482 | C | A | C | M | exonic     | GUCY2F   | missense | NM_001522:p.R432L     |
| 16246 | M  | 9622      | 9622      | G | C | G | S | intergenic | NA       | NA       | NA                    |
| 16461 | 1  | 12339107  | 12339107  | G | T | G | K | exonic     | VPS13D   | nonsense | NM_018156:p.E3288X    |
| 16461 | 1  | 16134669  | 16134669  | C | A | C | M | exonic     | SPEN     | missense | NM_015001:p.A3116E    |
| 16461 | 1  | 33771372  | 33771372  | C | A | C | M | exonic     | CSMD2    | missense | NM_052896:p.G3202W    |
| 16461 | 1  | 44194878  | 44194878  | T | C | T | Y | exonic     | IPO13    | missense | NM_014652:p.M341T     |
| 16461 | 1  | 64416573  | 64416573  | G | A | G | R | exonic     | ROR1     | missense | NM_005012:p.S754N     |
| 16461 | 1  | 148187543 | 148187543 | T | A | T | W | exonic     | OTUD7B   | missense | NM_020205:p.K397M     |
| 16461 | 1  | 149662617 | 149662617 | C | G | C | S | exonic     | POGZ     | missense | NM_001194938:p.D458H  |
| 16461 | 1  | 156418740 | 156418740 | T | A | T | W | intronic   | CD1D     | NA       | NA                    |
| 16461 | 1  | 156936697 | 156936697 | C | A | C | M | exonic     | OR6K2    | missense | NM_001005279:p.A124S  |
| 16461 | 1  | 181339370 | 181339370 | G | T | G | K | exonic     | LAMC1    | missense | NM_002293:p.D235Y     |
| 16461 | 1  | 198851269 | 198851269 | T | C | T | Y | exonic     | KIF14    | missense | NM_014875:p.I402V     |
| 16461 | 1  | 198853747 | 198853747 | T | A | T | W | exonic     | KIF14    | missense | NM_014875:p.K243M     |
| 16461 | 1  | 212237508 | 212237508 | A | G | A | R | exonic     | PROX1    | missense | NM_002763:p.H336R     |
| 16461 | 1  | 234713460 | 234713460 | G | C | G | S | UTR3       | EDARADD  | NA       | NA                    |
| 16461 | 1  | 245902419 | 245902419 | G | A | G | R | exonic     | OR13G1   | missense | NM_001005487:p.A183V  |
| 16461 | 2  | 9493915   | 9493915   | G | T | G | K | exonic     | CPSF3    | missense | NM_016207:p.R245M     |
| 16461 | 2  | 31032074  | 31032074  | C | T | C | Y | exonic     | GALNT14  | missense | NM_024572:p.A190T     |
| 16461 | 2  | 71759850  | 71759850  | G | C | G | S | exonic     | DYSF     | missense | NM_001130987:p.E2014Q |
| 16461 | 2  | 86685770  | 86685770  | T | C | T | Y | exonic     | RNF103   | missense | NM_005667:p.I255M     |
| 16461 | 2  | 88206980  | 88206980  | G | C | G | S | exonic     | FABP1    | missense | NM_001443:p.L24V      |
| 16461 | 2  | 99990278  | 99990278  | G | T | G | K | exonic     | AF3      | missense | NM_001025108:p.T109N  |
| 16461 | 2  | 127978729 | 127978729 | C | G | C | S | splicing   | IWS1     | NA       | NA                    |
| 16461 | 2  | 190041483 | 190041483 | C | G | C | S | exonic     | WDR75    | missense | NM_032168:p.L556V     |
| 16461 | 2  | 196892456 | 196892456 | T | A | T | W | exonic     | HECW2    | missense | NM_020760:p.E468V     |
| 16461 | 2  | 220079305 | 220079305 | C | T | C | Y | exonic     | GMPPA    | missense | NM_205847:p.P360L     |

|       |    |           |           |   |   |   |   |          |          |          |                      |
|-------|----|-----------|-----------|---|---|---|---|----------|----------|----------|----------------------|
| 16461 | 3  | 9388215   | 9388215   | G | A | G | R | exonic   | THUMPD3  | missense | NM_015453:p.V268M    |
| 16461 | 3  | 47274025  | 47274025  | C | T | C | Y | exonic   | KIF9     | missense | NM_022342:p.M337I    |
| 16461 | 3  | 62331016  | 62331016  | G | T | G | K | exonic   | FEZF2    | missense | NM_018008:p.Q388K    |
| 16461 | 3  | 120106213 | 120106213 | C | A | C | M | exonic   | IGSF11   | nonsense | NM_152538:p.E275X    |
| 16461 | 3  | 120617611 | 120617611 | C | A | C | M | exonic   | ARHGAP31 | missense | NM_020754:p.T1382K   |
| 16461 | 3  | 132776642 | 132776642 | A | C | A | M | exonic   | CPNE4    | missense | NM_130808:p.L297W    |
| 16461 | 3  | 197871164 | 197871164 | A | T | A | W | exonic   | LRR33    | missense | NM_198565:p.S85C     |
| 16461 | 5  | 11045745  | 11045745  | G | C | G | S | exonic   | CTNND2   | missense | NM_001332:p.I1043M   |
| 16461 | 5  | 52251931  | 52251931  | G | C | G | S | exonic   | ITGA1    | missense | NM_181501:p.R723P    |
| 16461 | 5  | 138735759 | 138735759 | G | C | G | S | exonic   | SLC23A1  | nonsense | NM_152685:p.Y548X    |
| 16461 | 5  | 140495585 | 140495585 | C | A | C | M | exonic   | PCDHB5   | missense | NM_015669:p.H129N    |
| 16461 | 5  | 140543660 | 140543660 | G | C | G | S | exonic   | PCDHB16  | missense | NM_020957:p.A448P    |
| 16461 | 5  | 147908544 | 147908544 | G | A | G | R | exonic   | HTR4     | missense | NM_001040173:p.A78V  |
| 16461 | 6  | 24564784  | 24564784  | C | A | C | M | exonic   | GPLD1    | missense | NM_001503:p.G357C    |
| 16461 | 6  | 26199257  | 26199257  | C | T | C | Y | exonic   | HFE      | missense | NM_139006:p.H96Y     |
| 16461 | 6  | 29749119  | 29749119  | G | C | G | S | exonic   | ZFP57    | missense | NM_001109809:p.R250G |
| 16461 | 6  | 32038283  | 32038283  | G | T | G | K | exonic   | SKIV2L   | missense | NM_006929:p.G385W    |
| 16461 | 6  | 41992505  | 41992505  | G | C | G | S | exonic   | MED20    | missense | NM_004275:p.S55R     |
| 16461 | 6  | 50894630  | 50894630  | G | C | G | S | exonic   | TFAP2B   | missense | NM_003221:p.E23Q     |
| 16461 | 6  | 126283848 | 126283848 | G | T | G | K | exonic   | NCOA7    | nonsense | NM_001199621:p.E656X |
| 16461 | 6  | 143134953 | 143134953 | C | A | C | M | exonic   | HIVEP2   | missense | NM_006734:p.Q872H    |
| 16461 | 6  | 159380240 | 159380240 | T | A | T | W | exonic   | TAGAP    | missense | NM_152133:p.N48I     |
| 16461 | 7  | 7496765   | 7496765   | C | G | C | S | exonic   | COL28A1  | missense | NM_001037763:p.G355A |
| 16461 | 7  | 45716690  | 45716690  | G | C | G | S | exonic   | ADCY1    | missense | NM_021116:p.A991P    |
| 16461 | 7  | 51063727  | 51063727  | C | A | C | M | exonic   | COBL     | missense | NM_015198:p.V854F    |
| 16461 | 7  | 131563655 | 131563655 | T | A | T | W | exonic   | PLXNA4   | missense | NM_020911:p.Y573F    |
| 16461 | 8  | 1795734   | 1795734   | G | C | G | S | exonic   | ARHGEF10 | missense | NM_014629:p.C153S    |
| 16461 | 8  | 24830935  | 24830935  | G | C | G | S | exonic   | NEFM     | missense | NM_005382:p.E554D    |
| 16461 | 8  | 86229469  | 86229469  | A | T | A | W | exonic   | LRRCC1   | nonsense | NM_033402:p.R564X    |
| 16461 | 8  | 87626140  | 87626140  | G | T | G | K | exonic   | CPNE3    | missense | NM_003909:p.Q230H    |
| 16461 | 8  | 91051864  | 91051864  | C | G | C | S | exonic   | NBN      | missense | NM_002485:p.G267A    |
| 16461 | 8  | 139784745 | 139784745 | C | A | C | M | exonic   | COL22A1  | missense | NM_152888:p.G849W    |
| 16461 | 8  | 139902637 | 139902637 | A | T | A | W | exonic   | COL22A1  | missense | NM_152888:p.I390N    |
| 16461 | 9  | 34600809  | 34600809  | C | A | C | M | exonic   | C9orf23  | missense | NM_148178:p.R162L    |
| 16461 | 9  | 100870706 | 100870706 | G | T | G | K | exonic   | COL15A1  | missense | NM_001855:p.G1296C   |
| 16461 | 9  | 131937197 | 131937197 | G | T | G | K | exonic   | GPR107   | missense | NM_001136558:p.Q564H |
| 16461 | 9  | 132950840 | 132950840 | C | A | C | M | exonic   | LAMC3    | missense | NM_006059:p.A1380E   |
| 16461 | 10 | 35882090  | 35882090  | G | T | G | K | exonic   | CCNY     | missense | NM_181698:p.Q185H    |
| 16461 | 10 | 54197985  | 54197985  | C | G | C | S | exonic   | MBL2     | missense | NM_000242:p.C225S    |
| 16461 | 10 | 60219055  | 60219055  | G | T | G | K | exonic   | BICC1    | nonsense | NM_001080512:p.E210X |
| 16461 | 10 | 115517207 | 115517207 | A | T | A | W | exonic   | C10orf81 | missense | NM_001193434:p.Y25F  |
| 16461 | 10 | 116082968 | 116082968 | A | G | A | R | splicing | AFAP1L2  | NA       | NA                   |
| 16461 | 10 | 116909801 | 116909801 | T | A | T | W | exonic   | ATRNL1   | nonsense | NM_207303:p.C280X    |
| 16461 | 10 | 129795058 | 129795058 | G | C | G | S | exonic   | MK167    | missense | NM_002417:p.S1679C   |
| 16461 | 10 | 134972884 | 134972884 | G | A | G | R | splicing | ZNF511   | missense | NM_145806:p.D52N     |
| 16461 | 11 | 11934293  | 11934293  | G | T | G | K | exonic   | USP47    | missense | NM_017944:p.D1287Y   |
| 16461 | 11 | 36571231  | 36571231  | G | T | G | K | exonic   | RAG2     | missense | NM_000536:p.T355N    |
| 16461 | 11 | 47729390  | 47729390  | T | G | T | K | exonic   | RBNP4    | missense | NM_015308:p.E222D    |
| 16461 | 11 | 49959805  | 49959805  | G | C | G | S | exonic   | OR4C12   | missense | NM_001005270:p.A270G |
| 16461 | 11 | 58031411  | 58031411  | G | C | G | S | exonic   | OR5B21   | missense | NM_001005218:p.F248L |
| 16461 | 11 | 63842333  | 63842333  | C | G | C | S | exonic   | PRDX5    | missense | NM_181652:p.Q24E     |
| 16461 | 11 | 64426087  | 64426087  | T | C | T | Y | exonic   | ATG2A    | missense | NM_015104:p.R1348G   |
| 16461 | 11 | 66015639  | 66015639  | C | G | C | S | exonic   | DPP3     | missense | NM_130443:p.F299L    |
| 16461 | 11 | 123353389 | 123353389 | G | T | G | K | exonic   | OR10S1   | missense | NM_001004474:p.H74N  |
| 16461 | 12 | 12868204  | 12868204  | G | C | G | S | exonic   | DDX47    | missense | NM_016355:p.G295A    |
| 16461 | 12 | 51196747  | 51196747  | C | A | C | M | exonic   | KRT5     | missense | NM_000424:p.K460N    |
| 16461 | 12 | 61830648  | 61830648  | G | T | G | K | exonic   | AVPR1A   | missense | NM_000706:p.T79K     |
| 16461 | 12 | 119919728 | 119919728 | C | A | C | M | exonic   | HNFB1A   | missense | NM_000545:p.Q460K    |
| 16461 | 12 | 131891384 | 131891384 | C | A | C | M | exonic   | GOLGA3   | missense | NM_005895:p.D530Y    |
| 16461 | 14 | 69514388  | 69514388  | G | A | G | R | splicing | SMOC1    | missense | NM_022137:p.G160D    |
| 16461 | 14 | 74671438  | 74671438  | T | G | T | K | exonic   | TMED10   | missense | NM_006827:p.Y188S    |
| 16461 | 15 | 26184426  | 26184426  | T | A | T | W | exonic   | HERC2    | missense | NM_004667:p.K601N    |
| 16461 | 15 | 71965957  | 71965957  | G | C | G | S | exonic   | TBC1D21  | missense | NM_153356:p.C243S    |
| 16461 | 16 | 21180114  | 21180114  | G | C | G | S | exonic   | CRYM     | missense | NM_001888:p.P281R    |
| 16461 | 16 | 24280320  | 24280320  | G | T | G | K | exonic   | CACNG3   | missense | NM_006539:p.V195F    |
| 16461 | 16 | 24487776  | 24487776  | G | T | G | K | exonic   | RBBP6    | missense | NM_018703:p.R721L    |
| 16461 | 16 | 30981095  | 30981095  | T | A | T | W | exonic   | ZNF668   | missense | NM_001172669:p.T242S |
| 16461 | 16 | 46680023  | 46680023  | G | T | G | K | exonic   | ABCC12   | missense | NM_033226:p.L1137I   |
| 16461 | 16 | 60318499  | 60318499  | T | A | T | W | splicing | CDH8     | missense | NM_001796:p.Q512H    |
| 16461 | 17 | 6369402   | 6369402   | T | C | T | Y | exonic   | PITPNM3  | missense | NM_031220:p.Q75R     |
| 16461 | 17 | 7519186   | 7519186   | C | A | C | M | exonic   | TP53     | missense | NM_001126117:p.V25F  |
| 16461 | 17 | 11534021  | 11534021  | G | T | G | K | exonic   | DNAH9    | missense | NM_001372:p.W1386L   |
| 16461 | 17 | 23991079  | 23991079  | T | C | T | Y | exonic   | KIAA0100 | missense | NM_014680:p.M328V    |
| 16461 | 17 | 24033061  | 24033061  | G | T | G | K | exonic   | SUPT6H   | missense | NM_003170:p.R511S    |
| 16461 | 17 | 24034432  | 24034432  | A | T | A | W | exonic   | SUPT6H   | missense | NM_003170:p.Y633F    |
| 16461 | 17 | 46178309  | 46178309  | G | T | G | K | exonic   | LUC7L3   | missense | NM_006107:p.C308F    |
| 16461 | 17 | 53710397  | 53710397  | C | T | C | Y | exonic   | MPO      | missense | NM_000250:p.A332T    |
| 16461 | 17 | 57023200  | 57023200  | C | A | C | M | exonic   | NACA2    | missense | NM_199290:p.D42Y     |
| 16461 | 17 | 59303650  | 59303650  | C | A | C | M | exonic   | CSH2     | missense | NM_022644:p.V159F    |

|         |    |           |           |   |   |   |   |            |           |          |                      |
|---------|----|-----------|-----------|---|---|---|---|------------|-----------|----------|----------------------|
| 16461   | 18 | 32552540  | 32552540  | G | C | G | S | exonic     | FHOD3     | missense | NM_025135:p.R919P    |
| 16461   | 18 | 45820604  | 45820604  | C | G | C | S | exonic     | MYO5B     | missense | NM_001080467:p.D73H  |
| 16461   | 18 | 57318660  | 57318660  | G | T | G | K | exonic     | CDH20     | missense | NM_031891:p.R202S    |
| 16461   | 19 | 4122691   | 4122691   | G | T | G | K | exonic     | CREB3L3   | missense | NM_032607:p.V371L    |
| 16461   | 19 | 11005877  | 11005877  | G | A | G | R | splicing   | SMARCA4   | NA       | NA                   |
| 16461   | 19 | 40445307  | 40445307  | T | G | T | K | exonic     | LSR       | missense | NM_205834:p.V265G    |
| 16461   | 19 | 41024992  | 41024992  | A | C | A | M | exonic     | NPH51     | missense | NM_004646:p.L846R    |
| 16461   | 19 | 47258826  | 47258826  | C | A | C | M | exonic     | GRIK5     | missense | NM_002088:p.G89V     |
| 16461   | 19 | 52277392  | 52277392  | C | G | C | S | splicing   | ZC3H4     | missense | NM_015168:p.G407R    |
| 16461   | 19 | 63542369  | 63542369  | G | C | G | S | exonic     | ZSCAN22   | missense | NM_181846:p.Q447H    |
| 16461   | 20 | 2589617   | 2589617   | T | C | T | Y | splicing   | IDH3B     | NA       | NA                   |
| 16461   | 20 | 43315658  | 43315658  | G | T | G | K | exonic     | SLPI      | nonsense | NM_003064:p.C72X     |
| 16461   | 21 | 39756230  | 39756230  | G | T | G | K | exonic     | SH3BGR    | missense | NM_007341:p.K98N     |
| 16461   | 22 | 35601683  | 35601683  | G | A | G | R | exonic     | NCF4      | missense | NM_000631:p.V224M    |
| 16461   | 22 | 38240008  | 38240008  | G | T | G | K | exonic     | SMCR7L    | missense | NM_019008:p.A376S    |
| 16461   | X  | 27908371  | 27908371  | T | A | T | W | exonic     | DCAF8L1   | missense | NM_001017930:p.K334N |
| 16461   | X  | 48342977  | 48342977  | G | T | G | K | exonic     | WDR13     | missense | NM_017883:p.D151Y    |
| 16461   | X  | 50356485  | 50356485  | G | T | G | K | exonic     | SHROOM4   | missense | NM_020717:p.Q1478K   |
| 16461   | X  | 77799712  | 77799712  | C | A | C | M | exonic     | ZCCHC5    | nonsense | NM_152694:p.G288X    |
| 16461   | X  | 91020657  | 91020657  | G | T | G | K | exonic     | PCDH11X   | missense | NM_032969:p.W921L    |
| 16461   | X  | 118655087 | 118655087 | T | A | T | W | exonic     | 41158     | missense | NM_015129:p.E296V    |
| 16617   | 1  | 41821668  | 41821668  | T | G | T | K | exonic     | HIVEP3    | missense | NM_001127714:p.E463A |
| 16617   | 1  | 156565858 | 156565858 | T | A | T | W | exonic     | CD1B      | missense | NM_001764:p.D271V    |
| 16617   | 1  | 156881950 | 156881950 | C | T | C | Y | exonic     | SPTA1     | missense | NM_003126:p.E1319K   |
| 16617   | 2  | 27276840  | 27276840  | A | C | A | M | exonic     | SLC5A6    | missense | NM_021095:p.S626A    |
| 16617   | 6  | 30274486  | 30274486  | C | A | C | M | exonic     | TRIM26    | missense | NM_003449:p.R125L    |
| 16617   | 6  | 31791140  | 31791140  | T | C | T | Y | exonic     | LY6G6D    | missense | NM_021246:p.L10P     |
| 16617   | 9  | 89687793  | 89687793  | G | T | G | K | exonic     | C9orf79   | missense | NM_178828:p.W56L     |
| 16617   | 10 | 127833864 | 127833864 | T | A | T | W | splicing   | ADAM12    | missense | NM_021641:p.E87D     |
| 16617   | 11 | 5419293   | 5419293   | G | T | G | K | exonic     | OR5111    | missense | NM_001005288:p.Q10K  |
| 16617   | 11 | 123316376 | 123316376 | G | C | G | S | exonic     | OR4D5     | missense | NM_001001965:p.M281I |
| 16617   | 12 | 102646776 | 102646776 | A | C | A | M | exonic     | STAB2     | missense | NM_017564:p.Y1652S   |
| 16617   | 17 | 5300126   | 5300126   | T | C | T | Y | exonic     | DHX33     | missense | NM_020162:p.D317G    |
| 16617   | 17 | 16796599  | 16796599  | C | T | C | Y | exonic     | TNFRSF13B | missense | NM_012452:p.V29M     |
| 16617   | 20 | 50202217  | 50202217  | C | A | C | M | exonic     | ZFP64     | missense | NM_018197:p.A641S    |
| 16617   | X  | 78102884  | 78102884  | A | G | A | R | exonic     | P2RY10    | missense | NM_014499:p.I71V     |
| 16989   | 1  | 245655305 | 245655305 | C | A | C | M | exonic     | NLRP3     | missense | NM_001079821:p.A646D |
| 18472   | 7  | 149617558 | 149617558 | T | C | T | Y | exonic     | ACTR3C    | missense | NM_001164458:p.I71V  |
| 7313    | 1  | 246410259 | 246410259 | G | C | G | S | exonic     | OR2M2     | missense | NM_001004688:p.V117L |
| 7313    | 3  | 109958594 | 109958594 | A | G | A | R | splicing   | RETNLB    | NA       | NA                   |
| 7313    | 3  | 110305434 | 110305434 | C | A | C | M | exonic     | MORC1     | missense | NM_014429:p.G59W     |
| 7313    | 3  | 120130116 | 120130116 | G | C | G | S | exonic     | IGSF11    | nonsense | NM_152538:p.Y117X    |
| 7313    | 3  | 130730373 | 130730373 | A | T | A | W | exonic     | RHO       | missense | NM_000539:p.Q36L     |
| 7313    | 7  | 80128362  | 80128362  | A | T | A | W | exonic     | CD36      | missense | NM_000072:p.N110I    |
| 7313    | 7  | 95004926  | 95004926  | C | G | C | S | exonic     | ASB4      | missense | NM_016116:p.C400W    |
| 7313    | 7  | 99809207  | 99809207  | A | G | A | R | UTR5       | PILRA     | NA       | NA                   |
| 7313    | 7  | 107204213 | 107204213 | C | T | C | Y | exonic     | SLC26A3   | missense | NM_000111:p.E533K    |
| 7313    | 7  | 110550783 | 110550783 | G | T | G | K | exonic     | LRRN3     | missense | NM_001099660:p.S240I |
| 7313    | 7  | 124191326 | 124191326 | C | A | C | M | exonic     | GPR37     | missense | NM_005302:p.C314F    |
| 7313    | 7  | 125960819 | 125960819 | C | A | C | M | exonic     | GRM8      | missense | NM_001127323:p.G618V |
| 7313    | 7  | 137451937 | 137451937 | G | T | G | K | exonic     | AKR1D1    | missense | NM_001190906:p.D283Y |
| 7313    | 10 | 102728963 | 102728963 | G | A | G | R | exonic     | SEMA4G    | missense | NM_017893:p.A310T    |
| 7313    | 11 | 4826819   | 4826819   | G | A | G | R | exonic     | OR51S1    | missense | NM_001004758:p.P66S  |
| 7313    | 11 | 18209665  | 18209665  | G | A | G | R | exonic     | SAA2-SAA4 | missense | NM_001199744:p.P196L |
| 7313    | 11 | 65407278  | 65407278  | T | A | T | W | exonic     | CTSW      | missense | NM_001335:p.V276E    |
| 7313    | 11 | 103413013 | 103413013 | C | A | C | M | exonic     | DDI1      | missense | NM_001001711:p.P85T  |
| 7313    | 14 | 19458885  | 19458885  | T | A | T | W | exonic     | OR4K5     | missense | NM_001005483:p.F94I  |
| 7313    | 15 | 32142850  | 32142850  | T | A | T | W | exonic     | CHRM5     | missense | NM_012125:p.C214S    |
| 7313    | 20 | 8718179   | 8718179   | T | C | T | Y | exonic     | PLCB1     | missense | NM_182734:p.M1098T   |
| 7313    | X  | 48921364  | 48921364  | G | A | G | R | exonic     | PRICKLE3  | missense | NM_006150:p.R293C    |
| 7313    | M  | 11752     | 11752     | A | G | A | R | intergenic | NA        | NA       | NA                   |
| 7996    | 3  | 152648252 | 152648252 | C | T | C | Y | exonic     | IGSF10    | missense | NM_178822:p.R736H    |
| 7996    | 17 | 7519188   | 7519188   | C | G | C | S | exonic     | TP53      | missense | NM_001126117:p.R24P  |
| 7996    | 19 | 4122710   | 4122710   | C | A | C | M | exonic     | CREB3L3   | missense | NM_032607:p.P377Q    |
| LU-1991 | 1  | 148165212 | 148165212 | G | C | G | S | exonic     | SF3B4     | missense | NM_005850:p.T129S    |
| LU-1991 | 1  | 153416390 | 153416390 | G | A | G | R | splicing   | TRIM46    | silent   | NM_025058:p.E303E    |
| LU-1991 | 1  | 156565843 | 156565843 | C | G | C | S | exonic     | CD1B      | missense | NM_001764:p.G276A    |
| LU-1991 | 1  | 201404786 | 201404786 | C | T | C | Y | exonic     | MYBPH     | missense | NM_004997:p.A430T    |
| LU-1991 | 1  | 212237806 | 212237806 | G | C | G | S | exonic     | PROX1     | missense | NM_002763:p.Q435H    |
| LU-1991 | 1  | 225240900 | 225240900 | C | G | C | S | exonic     | ADCK3     | missense | NM_020247:p.L595V    |
| LU-1991 | 1  | 234220832 | 234220832 | C | A | C | M | exonic     | NID1      | missense | NM_002508:p.A969S    |
| LU-1991 | 2  | 29793994  | 29793994  | C | A | C | M | exonic     | ALK       | missense | NM_004304:p.W247C    |
| LU-1991 | 2  | 105224759 | 105224759 | C | A | C | M | exonic     | GPR45     | missense | NM_007227:p.N4K      |
| LU-1991 | 2  | 167815498 | 167815498 | G | T | G | K | exonic     | XIRP2     | missense | NM_152381:p.R3117L   |
| LU-1991 | 2  | 185511592 | 185511592 | C | A | C | M | exonic     | ZNF804A   | missense | NM_194250:p.P1075Q   |
| LU-1991 | 2  | 208197280 | 208197280 | G | A | G | R | exonic     | FAM119A   | missense | NM_001127395:p.A22V  |
| LU-1991 | 2  | 210350255 | 210350255 | G | T | G | K | exonic     | UNC80     | missense | NM_182587:p.E109D    |
| LU-1991 | 2  | 233118618 | 233118618 | C | A | C | M | exonic     | CHRNA     | missense | NM_005199:p.P501Q    |
| LU-1991 | 3  | 38238145  | 38238145  | G | T | G | K | exonic     | OXSRI     | missense | NM_005109:p.G188V    |

|            |           |           |   |   |   |   |            |           |          |                      |
|------------|-----------|-----------|---|---|---|---|------------|-----------|----------|----------------------|
| LU-1991 3  | 39203099  | 39203099  | G | T | G | K | exonic     | XIRP1     | missense | NM_001198621:p.P948T |
| LU-1991 3  | 43364226  | 43364226  | G | A | G | R | exonic     | SNRK      | missense | NM_017719:p.E491K    |
| LU-1991 3  | 48483609  | 48483609  | C | T | C | Y | exonic     | TREX1     | missense | NM_016381:p.T239I    |
| LU-1991 3  | 141605301 | 141605301 | C | G | C | S | exonic     | CLSTN2    | missense | NM_022131:p.Q125E    |
| LU-1991 4  | 126631264 | 126631264 | C | G | C | S | exonic     | FAT4      | missense | NM_024582:p.P4613A   |
| LU-1991 5  | 19519245  | 19519245  | C | A | C | M | exonic     | CDH18     | missense | NM_001167667:p.M565I |
| LU-1991 6  | 26216075  | 26216075  | C | T | C | Y | exonic     | HIST1H1T  | missense | NM_005323:p.D76N     |
| LU-1991 6  | 64474055  | 64474055  | C | T | C | Y | exonic     | PHF3      | missense | NM_015153:p.T1182M   |
| LU-1991 7  | 20664717  | 20664717  | G | A | G | R | exonic     | ABCB5     | missense | NM_001163993:p.A89T  |
| LU-1991 7  | 142335346 | 142335346 | G | C | G | S | exonic     | TRPV5     | missense | NM_019841:p.L290V    |
| LU-1991 9  | 139261954 | 139261954 | G | C | G | S | exonic     | FAM166A   | missense | NM_001001710:p.P12R  |
| LU-1991 10 | 33514567  | 33514567  | C | T | C | Y | exonic     | NRP1      | missense | NM_003873:p.C809Y    |
| LU-1991 10 | 49985924  | 49985924  | C | G | C | S | exonic     | C10orf72  | missense | NM_144984:p.V60L     |
| LU-1991 11 | 5818851   | 5818851   | G | T | G | K | exonic     | OR52E6    | missense | NM_001005167:p.P285T |
| LU-1991 11 | 8916121   | 8916121   | C | G | C | S | exonic     | ASCL3     | missense | NM_020646:p.R55P     |
| LU-1991 11 | 68460620  | 68460620  | G | T | G | K | exonic     | IGHMBP2   | missense | NM_002180:p.G699V    |
| LU-1991 11 | 131904164 | 131904164 | C | A | C | M | splicing   | OPCML     | NA       | NA                   |
| LU-1991 12 | 131120139 | 131120139 | G | C | G | S | splicing   | EP400     | missense | NM_015409:p.Q3006H   |
| LU-1991 14 | 19833384  | 19833384  | G | A | G | R | exonic     | TTC5      | missense | NM_138376:p.P329S    |
| LU-1991 14 | 30712334  | 30712334  | C | A | C | M | exonic     | HECTD1    | missense | NM_015382:p.G312V    |
| LU-1991 14 | 50294857  | 50294857  | T | G | T | K | exonic     | NIN       | missense | NM_182946:p.K881Q    |
| LU-1991 14 | 91045710  | 91045710  | G | A | G | R | exonic     | SMEK1     | missense | NM_032560:p.T12M     |
| LU-1991 15 | 23476497  | 23476497  | C | T | C | Y | exonic     | ATP10A    | missense | NM_024490:p.V1244M   |
| LU-1991 15 | 75260398  | 75260398  | T | C | T | Y | exonic     | PEAK1     | missense | NM_024776:p.Y309C    |
| LU-1991 16 | 4599718   | 4599718   | G | C | G | S | exonic     | FAM100A   | missense | NM_145253:p.P151A    |
| LU-1991 16 | 20379016  | 20379016  | A | T | A | W | exonic     | ACSM2A    | missense | NM_001010845:p.S27C  |
| LU-1991 16 | 49733015  | 49733015  | C | T | C | Y | exonic     | SALL1     | missense | NM_002968:p.V207M    |
| LU-1991 17 | 3142559   | 3142559   | G | T | G | K | exonic     | OR3A1     | missense | NM_002550:p.A23E     |
| LU-1991 17 | 16267804  | 16267804  | G | C | G | S | exonic     | TRPV2     | missense | NM_016113:p.E308Q    |
| LU-2349 3  | 42274716  | 42274716  | G | C | G | S | exonic     | CCK       | missense | NM_000729:p.R76G     |
| Lu-597 6   | 43856533  | 43856533  | G | A | G | R | exonic     | VEGFA     | missense | NM_001171623:p.R170H |
| 7313 1     | 156702421 | 156702421 | G | T | G | K | exonic     | OR10K1    | missense | NM_001004473:p.C149F |
| 7313 1     | 166116368 | 166116368 | T | A | T | W | exonic     | ADCY10    | missense | NM_018417:p.Q375L    |
| 7313 1     | 43555500  | 43555500  | T | A | T | W | exonic     | TIE1      | missense | NM_005424:p.L818H    |
| 7313 10    | 26829889  | 26829889  | T | C | T | Y | exonic     | APBB1P    | missense | NM_019043:p.L99P     |
| 7313 10    | 68357914  | 68357914  | G | T | G | K | exonic     | LRRTM3    | missense | NM_178011:p.A412S    |
| 7313 11    | 123945533 | 123945533 | T | C | T | Y | exonic     | OR8A1     | missense | NM_001005194:p.F120S |
| 7313 13    | 24569369  | 24569369  | G | A | R | R | exonic     | PABPC3    | missense | NM_030979:p.E345K    |
| 7313 2     | 210267643 | 210267643 | C | A | C | M | exonic     | MAP2      | missense | NM_002374:p.P835Q    |
| 7313 20    | 30503867  | 30503867  | C | T | C | Y | exonic     | C20orf112 | missense | NM_080616:p.R308Q    |
| 7313 4     | 96980513  | 96980513  | C | G | C | S | exonic     | PDHA2     | nonsense | NM_005390:p.Y63X     |
| 7313 Y     | 57752241  | 57752241  | G | C | G | S | exonic     | IL9R      | missense | NM_002186:p.G447R    |
| 7996 9     | 124591613 | 124591613 | G | C | G | S | exonic     | OR5C1     | missense | NM_001001923:p.S194T |
| 12586 1    | 155146782 | 155146782 | C | T | C | Y | exonic     | PEAR1     | missense | NM_001080471:p.P604L |
| 12586 14   | 69489985  | 69489985  | G | A | G | R | exonic     | SMOC1     | missense | NM_022137:p.D121N    |
| 12586 17   | 3538086   | 3538086   | C | A | C | M | exonic     | P2RX5     | missense | NM_002561:p.G317V    |
| 12586 17   | 49255422  | 49255422  | C | A | C | M | exonic     | KIF2B     | missense | NM_032559:p.S10Y     |
| 12586 19   | 7841998   | 7841998   | A | G | A | R | exonic     | FLJ22184  | missense | NM_001190467:p.W711R |
| 12586 21   | 46364163  | 46364163  | C | A | C | M | exonic     | COL6A2    | missense | NM_058174:p.P435T    |
| 12820 16   | 69658720  | 69658720  | C | A | C | M | exonic     | HYDIN     | missense | NM_001198542:p.E710D |
| 12820 19   | 41028226  | 41028226  | G | A | G | R | exonic     | NPH51     | missense | NM_004646:p.A605V    |
| 12820 9    | 99117049  | 99117049  | G | T | G | K | splicing   | C9orf174  | missense | NM_020893:p.M309I    |
| 12924 1    | 12902285  | 12902285  | T | C | T | Y | exonic     | PRAMEF7   | missense | NM_001012276:p.V297A |
| 12924 1    | 13480889  | 13480889  | A | G | A | R | exonic     | PRAMEF7   | missense | NM_001012276:p.V297A |
| 12924 1    | 154888959 | 154888959 | G | T | G | K | exonic     | BCAN      | missense | NM_198427:p.R531S    |
| 12924 1    | 19280442  | 19280442  | C | A | C | M | exonic     | UBR4      | missense | NM_020765:p.G5074V   |
| 12924 10   | 48049173  | 48049173  | T | C | T | Y | exonic     | GDF10     | missense | NM_004962:p.Y240C    |
| 12924 10   | 50624885  | 50624885  | C | A | C | M | exonic     | OGDHL     | missense | NM_018245:p.G405C    |
| 12924 14   | 104142095 | 104142095 | T | C | T | Y | exonic     | TMEM179   | missense | NM_207379:p.Q10R     |
| 12924 15   | 41661613  | 41661613  | C | A | C | M | exonic     | PPIP5K1   | missense | NM_001190214:p.G216V |
| 12924 15   | 41761448  | 41761448  | C | A | C | M | intergenic | NA        | NA       | NA                   |
| 12924 15   | 63411435  | 63411435  | A | C | A | M | exonic     | IGDCC3    | missense | NM_004884:p.F349V    |
| 12924 16   | 45339132  | 45339132  | C | A | C | M | exonic     | MYLK3     | nonsense | NM_182493:p.E159X    |
| 12924 17   | 1486835   | 1486835   | C | A | C | M | exonic     | SCARF1    | missense | NM_003693:p.W517C    |
| 12924 19   | 49344765  | 49344765  | A | T | A | W | splicing   | ZNF234    | missense | NM_001144824:p.E6V   |
| 12924 22   | 35656371  | 35656371  | G | T | G | K | exonic     | CSF2RB    | missense | NM_000395:p.A243S    |
| 12924 3    | 123463116 | 123463116 | T | A | T | W | exonic     | CASR      | missense | NM_001178065:p.S182T |
| 12924 5    | 79960676  | 79960676  | C | T | C | Y | exonic     | DHFR      | missense | NM_000791:p.E184K    |
| 12924 X    | 154657519 | 154657519 | G | T | G | K | exonic     | SPRY3     | missense | NM_005840:p.R264S    |
| 12924 X    | 16099023  | 16099023  | C | A | C | M | intergenic | NA        | NA       | NA                   |
| 12924 Y    | 57516719  | 57516719  | G | T | G | K | exonic     | SPRY3     | missense | NM_005840:p.R264S    |
| 13280 1    | 116944164 | 116944164 | G | A | R | R | exonic     | IGSF3     | missense | NM_001007237:p.R651W |
| 13280 11   | 124175353 | 124175353 | C | A | C | M | exonic     | C11orf61  | missense | NM_024631:p.R45L     |
| 13280 11   | 86343504  | 86343504  | G | C | G | S | exonic     | FZD4      | missense | NM_012193:p.S91C     |
| 13280 12   | 112391325 | 112391325 | C | A | C | M | exonic     | LHX5      | missense | NM_022363:p.G128C    |
| 13280 14   | 87799634  | 87799634  | C | G | C | S | exonic     | CNK10     | missense | NM_138318:p.A23P     |
| 13280 16   | 20462042  | 20462042  | C | A | C | M | exonic     | ACSM2B    | missense | NM_182617:p.W442L    |
| 13280 17   | 30792494  | 30792494  | T | C | Y | C | exonic     | SLFN13    | missense | NM_144682:p.R643G    |
| 13280 17   | 74551769  | 74551769  | G | T | G | K | exonic     | C1QTNF1   | nonsense | NM_030968:p.E42X     |

|         |    |           |           |   |   |   |   |            |           |           |                      |
|---------|----|-----------|-----------|---|---|---|---|------------|-----------|-----------|----------------------|
| 13280   | 19 | 55862524  | 55862524  | G | T | G | K | exonic     | SHANK1    | missense  | NM_016148:p.A1502D   |
| 13280   | 3  | 75558402  | 75558402  | C | T | Y | T | ncRNA      | FAM86DP   | NA        | NA                   |
| 13280   | 5  | 73177871  | 73177871  | G | T | G | K | exonic     | RGNEF     | missense  | NM_001080479:p.A4845 |
| 13280   | 7  | 72626650  | 72626650  | T | A | T | W | splicing   | TBL2      | missense  | NM_012453:p.K87M     |
| 13280   | 7  | 94953318  | 94953318  | G | T | G | K | exonic     | ASB4      | missense  | NM_145872:p.L33F     |
| 13280   | X  | 152339571 | 152339571 | C | A | C | M | exonic     | ZFP92     | missense  | NM_001136273:p.A181E |
| 13280   | X  | 66682840  | 66682840  | C | A | C | M | exonic     | AR        | missense  | NM_000044:p.P376H    |
| 13394   | 12 | 50865716  | 50865716  | C | T | C | Y | intronic   | KRT80     | NA        | NA                   |
| 13394   | 7  | 121731405 | 121731405 | G | T | G | K | exonic     | FEZF1     | missense  | NM_001024613:p.A108E |
| 13542   | 1  | 246106171 | 246106171 | A | C | A | M | exonic     | TRIM58    | missense  | NM_015431:p.E406D    |
| 13542   | 5  | 149193282 | 149193282 | G | T | G | K | exonic     | PPARGC1B  | nonsense  | NM_001172698:p.E446X |
| 15145   | 1  | 153476403 | 153476403 | T | G | T | K | exonic     | GBA       | missense  | NM_000157:p.T69P     |
| 15145   | 1  | 154717348 | 154717348 | C | A | C | M | exonic     | MEF2D     | nonsense  | NM_005920:p.E100X    |
| 15145   | 10 | 135054840 | 135054840 | G | A | G | R | exonic     | PAOX      | missense  | NM_152911:p.R476H    |
| 15145   | 19 | 6452604   | 6452604   | T | A | T | W | exonic     | TUBB4     | missense  | NM_006087:p.I30F     |
| 16246   | 1  | 212624715 | 212624715 | T | G | T | K | exonic     | PTPN14    | missense  | NM_005401:p.N369T    |
| 16246   | 1  | 238323439 | 238323439 | C | A | C | M | exonic     | FMN2      | missense  | NM_020066:p.H469Q    |
| 16246   | 1  | 53832859  | 53832859  | T | C | T | Y | exonic     | GLI51     | missense  | NM_147193:p.N102S    |
| 16246   | 11 | 110000238 | 110000238 | T | A | T | W | exonic     | ARHGAP20  | missense  | NM_020809:p.N121Y    |
| 16246   | 11 | 63879351  | 63879351  | G | T | G | K | exonic     | CCDC88B   | synonymou | NM_032251:p.G1403G   |
| 16246   | 12 | 15564408  | 15564408  | G | T | G | K | exonic     | PTPRO     | missense  | NM_002848:p.A596S    |
| 16246   | 12 | 32840458  | 32840458  | T | C | T | Y | exonic     | PKP2      | missense  | NM_001005242:p.T737A |
| 16246   | 2  | 167815504 | 167815504 | C | G | C | S | exonic     | XIRP2     | missense  | NM_152381:p.P3119R   |
| 16246   | 2  | 198350033 | 198350033 | G | C | G | S | exonic     | BOLL      | missense  | NM_197970:p.Q103E    |
| 16246   | 22 | 42569152  | 42569152  | G | T | G | K | intronic   | SULT4A1   | NA        | NA                   |
| 16246   | 5  | 14540788  | 14540788  | C | G | C | S | exonic     | TRIO      | missense  | NM_007118:p.V2351L   |
| 16246   | 7  | 70913415  | 70913415  | T | A | T | W | splicing   | CALN1     | NA        | NA                   |
| 16246   | 9  | 23694928  | 23694928  | C | A | C | M | exonic     | ELAVL2    | missense  | NM_004432:p.D159Y    |
| 16246   | 9  | 95468105  | 95468105  | A | T | A | W | exonic     | PHF2      | missense  | NM_005392:p.K710M    |
| 16246   | X  | 55187006  | 55187006  | G | T | G | K | exonic     | FAM104B   | missense  | NM_001166699:p.N94K  |
| 16461   | 1  | 152808912 | 152808912 | G | C | G | S | exonic     | CHRN2     | missense  | NM_000748:p.M77I     |
| 16461   | 1  | 171895104 | 171895104 | T | C | T | Y | exonic     | ANKRD45   | missense  | NM_198493:p.E26G     |
| 16461   | 1  | 245836214 | 245836214 | A | G | A | R | exonic     | OR2G3     | missense  | NM_001001914:p.H235R |
| 16461   | 1  | 246752471 | 246752471 | T | A | T | W | exonic     | OR2G6     | missense  | NM_001013355:p.L301M |
| 16461   | 10 | 45641569  | 45641569  | C | A | C | M | exonic     | AGAP4     | nonsense  | NM_133446:p.E598X    |
| 16461   | 10 | 50614447  | 50614447  | C | A | C | M | exonic     | OGDHL     | missense  | NM_018245:p.D906Y    |
| 16461   | 10 | 51134670  | 51134670  | C | A | C | M | exonic     | AGAP7     | nonsense  | NM_001077685:p.E598X |
| 16461   | 11 | 57715142  | 57715142  | T | C | T | Y | exonic     | OR9Q2     | missense  | NM_001005283:p.F202L |
| 16461   | 11 | 60656166  | 60656166  | C | G | C | S | exonic     | VPS37C    | missense  | NM_017966:p.G257A    |
| 16461   | 11 | 89286992  | 89286992  | T | G | T | K | intergenic | NA        | NA        | NA                   |
| 16461   | 11 | 89303112  | 89303112  | A | C | A | M | splicing   | TRIM49L1  | synonymou | NM_001105522:p.R254R |
| 16461   | 13 | 52293134  | 52293134  | G | A | G | R | intergenic | NA        | NA        | NA                   |
| 16461   | 16 | 23632145  | 23632145  | C | A | C | M | exonic     | ERN2      | missense  | NM_033266:p.R3S      |
| 16461   | 17 | 9704128   | 9704128   | C | A | C | M | exonic     | GLP2R     | missense  | NM_004246:p.L304M    |
| 16461   | 19 | 11398788  | 11398788  | A | T | A | T | exonic     | CCDC151   | missense  | NM_145045:p.L173M    |
| 16461   | 19 | 52536684  | 52536684  | C | G | C | S | exonic     | GPR77     | missense  | NM_018485:p.S263C    |
| 16461   | 19 | 54751806  | 54751806  | C | A | C | M | splicing   | NOSIP     | NA        | NA                   |
| 16461   | 19 | 63759311  | 63759311  | C | A | C | M | exonic     | UBE2M     | missense  | NM_003969:p.G170V    |
| 16461   | 2  | 130567481 | 130567481 | C | A | C | M | splicing   | POTEF     | nonsense  | NM_001099771:p.E494X |
| 16461   | 2  | 131719520 | 131719520 | G | T | G | K | splicing   | POTEE     | nonsense  | NM_001083538:p.E494X |
| 16461   | 21 | 42584707  | 42584707  | G | A | G | R | exonic     | ABCG1     | missense  | NM_207628:p.V487M    |
| 16461   | 22 | 39698614  | 39698614  | A | T | A | W | UTR3       | RBX1      | NA        | NA                   |
| 16461   | 4  | 103949938 | 103949938 | A | T | A | W | splicing   | UBE2D3    | NA        | NA                   |
| 16461   | 6  | 29821359  | 29821359  | C | A | C | M | ncRNA      | LOC285830 | NA        | NA                   |
| 16461   | 6  | 34104122  | 34104122  | C | G | C | S | splicing   | GRM4      | NA        | NA                   |
| 16461   | 7  | 4120354   | 4120354   | G | T | G | K | exonic     | SDK1      | nonsense  | NM_152744:p.E1249X   |
| 16461   | 9  | 37725679  | 37725679  | C | A | C | M | exonic     | FRMPD1    | missense  | NM_014907:p.T450K    |
| 16461   | X  | 106403000 | 106403000 | G | A | G | R | intergenic | NA        | NA        | NA                   |
| 16617   | 15 | 41662935  | 41662935  | T | C | T | Y | exonic     | PPIP5K1   | missense  | NM_001190214:p.N101S |
| 16617   | 15 | 41762770  | 41762770  | T | C | T | Y | intergenic | NA        | NA        | NA                   |
| 16989   | 19 | 53031383  | 53031383  | T | A | T | W | exonic     | CRX       | missense  | NM_000554:p.F58I     |
| 16989   | 2  | 230820911 | 230820911 | C | T | C | Y | exonic     | SP140     | missense  | NM_007237:p.T260I    |
| 18472   | 12 | 6567261   | 6567261   | A | T | A | W | exonic     | CHD4      | missense  | NM_001273:p.L1194Q   |
| 18472   | 6  | 32407808  | 32407808  | C | T | C | Y | splicing   | C6orf10   | synonymou | NM_006781:p.V158V    |
| LU-1516 | 1  | 153257760 | 153257760 | G | T | G | K | exonic     | DCST2     | missense  | NM_144622:p.H736N    |
| LU-1516 | 10 | 76459658  | 76459658  | G | T | G | K | exonic     | MYST4     | missense  | NM_012330:p.M1690I   |
| LU-1516 | 11 | 64265562  | 64265562  | G | T | G | K | intronic   | RASGRP2   | NA        | NA                   |
| LU-1991 | 1  | 12960891  | 12960891  | G | C | G | S | exonic     | PRAMEF22  | missense  | NM_001100631:p.V457L |
| LU-1991 | 1  | 13201497  | 13201497  | C | G | C | S | exonic     | PRAMEF22  | missense  | NM_001100631:p.V457L |
| LU-1991 | 1  | 93830486  | 93830486  | T | C | T | Y | exonic     | BCAR3     | missense  | NM_003567:p.E137G    |
| LU-1991 | 10 | 115325645 | 115325645 | G | T | G | K | splicing   | HABP2     | NA        | NA                   |
| LU-1991 | 11 | 70937349  | 70937349  | A | G | A | R | UTR5       | KRTAP5-9  | NA        | NA                   |
| LU-1991 | 15 | 83183333  | 83183333  | G | C | G | S | splicing   | ALPK3     | NA        | NA                   |
| LU-1991 | 16 | 29816771  | 29816771  | G | A | G | R | exonic     | SEZ6L2    | missense  | NM_012410:p.P39S     |
| LU-1991 | 18 | 5406152   | 5406152   | G | T | G | K | exonic     | EPB41L3   | missense  | NM_012307:p.Q578K    |
| LU-1991 | 2  | 135337555 | 135337555 | C | G | C | S | exonic     | ACMSD     | missense  | NM_138326:p.L124V    |
| LU-1991 | 2  | 220212558 | 220212558 | G | T | G | K | exonic     | SLC4A3    | missense  | NM_201574:p.W1072L   |
| LU-1991 | 3  | 131178741 | 131178741 | G | C | G | S | exonic     | TRH       | missense  | NM_007117:p.E241Q    |
| LU-1991 | 3  | 4533242   | 4533242   | A | G | A | R | exonic     | ITPR1     | missense  | NM_002222:p.T23A     |

|            |           |           |   |   |   |   |            |          |           |                      |
|------------|-----------|-----------|---|---|---|---|------------|----------|-----------|----------------------|
| LU-1991 3  | 9744066   | 9744066   | G | C | G | S | intronic   | CPNE9    | NA        | NA                   |
| LU-1991 8  | 7758457   | 7758457   | G | T | G | K | exonic     | SPAG11A  | missense  | NM_001081552:p.R106L |
| LU-2349 11 | 59039785  | 59039785  | T | C | T | Y | exonic     | OR4D9    | missense  | NM_001004711:p.F275S |
| LU-2349 11 | 65947933  | 65947933  | G | C | G | S | exonic     | NPAS4    | missense  | NM_178864:p.Q332H    |
| 12924 X    | 21584027  | 21584027  | G | T | G | K | exonic     | KLHL34   | missense  | NM_153270:p.R601S    |
| 16461 15   | 97487241  | 97487241  | C | T | C | Y | exonic     | SYNM     | synonymou | NM_145728:p.L384L    |
| 16461 6    | 56566624  | 56566624  | C | G | C | S | exonic     | DST      | missense  | NM_015548:p.L1551F   |
| LU-1991 1  | 157045013 | 157045013 | C | G | C | S | intergenic | NA       | NA        | NA                   |
| LU-1991 19 | 10463272  | 10463272  | G | T | G | K | exonic     | KEAP1    | missense  | NM_012289:p.H436N    |
| LU-1991 19 | 10995212  | 10995212  | G | T | G | K | exonic     | SMARCA4  | nonsense  | NM_001128845:p.E960X |
| LU-1991 20 | 49054177  | 49054177  | G | T | G | K | exonic     | KCNG1    | missense  | NM_002237:p.L450M    |
| LU-1991 22 | 19715527  | 19715527  | G | T | G | K | exonic     | SLC7A4   | missense  | NM_004173:p.S192Y    |
| LU-1991 22 | 20129956  | 20129956  | C | T | C | Y | exonic     | HIC2     | missense  | NM_015094:p.P258S    |
| LU-1991 22 | 34073156  | 34073156  | G | T | G | K | exonic     | TOM1     | missense  | NM_001135729:p.R446L |
| LU-1991 22 | 39818988  | 39818988  | T | G | T | Y | exonic     | EP300    | missense  | NM_001429:p.S12A     |
| LU-1991 3  | 75870166  | 75870166  | C | A | C | M | exonic     | ZNF717   | missense  | NM_001128223:p.S433I |
| LU-1991 X  | 107203229 | 107203229 | C | T | C | Y | exonic     | VSIG1    | missense  | NM_001170553:p.S257F |
| LU-1991 X  | 153235241 | 153235241 | C | A | C | M | exonic     | FLNA     | missense  | NM_001456:p.C1904F   |
| LU-1991 X  | 9860481   | 9860481   | C | G | C | S | exonic     | SHROOM2  | nonsense  | NM_001649:p.S1053X   |
| LU-1991 X  | 9865379   | 9865379   | C | G | C | S | exonic     | SHROOM2  | missense  | NM_001649:p.R1265G   |
| 7313 1     | 142054707 | 142054707 | A | C | A | M | intergenic | NA       | NA        | NA                   |
| 7313 13    | 19119125  | 19119125  | G | A | G | R | exonic     | PRPF3    | missense  | NM_004698:p.D492A    |
| 7313 18    | 9112638   | 9112638   | G | C | G | S | splicing   | CAD      | NA        | NA                   |
| 7313 19    | 57962244  | 57962244  | C | T | C | Y | exonic     | HSPD1    | missense  | NM_002156:p.G56E     |
| 7313 2     | 198071651 | 198071651 | C | T | C | Y | ncRNA      | GK3P     | NA        | NA                   |
| 7313 20    | 4110807   | 4110807   | G | T | G | K | exonic     | OR4F16   | missense  | NM_001005277:p.R89G  |
| 7313 4     | 166419260 | 166419260 | G | C | G | S | splicing   | FRS3     | NA        | NA                   |
| 7313 5     | 180727158 | 180727158 | C | G | C | S | exonic     | PLEKHA8  | missense  | NM_001197026:p.L494P |
| 7313 8     | 106760    | 106760    | G | C | G | S | exonic     | OR4F21   | missense  | NM_001005504:p.R89G  |
| 7945 7     | 30084849  | 30084849  | T | C | T | Y | exonic     | SPAG11B  | missense  | NM_058202:p.R80L     |
| LU-1516 X  | 153261315 | 153261315 | A | C | A | M | exonic     | MPHOSPH8 | missense  | NM_017520:p.M304I    |
| LU-1991 8  | 7292957   | 7292957   | C | A | C | M | exonic     | PLEKHG3  | missense  | NM_015549:p.S52P     |
| Lu-2375 1  | 148583310 | 148583310 | A | C | A | M | exonic     | NDUFV2   | missense  | NM_021074:p.R143P    |
| Lu-2375 14 | 64264256  | 64264256  | T | C | T | Y | exonic     | ZNF600   | missense  | NM_198457:p.D193N    |
| Lu-2375 6  | 41851133  | 41851133  | A | C | A | M | exonic     | SMOX     | missense  | NM_175839:p.E227D    |
| Lu-597 2   | 27314256  | 27314256  | T | G | T | K | exonic     | EMD      | missense  | NM_000117:p.S52R     |

Supplementary Table 8. All somatic SNVs in protein coding regions in 31 lung cancer genomes

| sample | chr | start     | end       | ref   | var | geno_N | geno_T | region     | gene      | function | seq_change                |
|--------|-----|-----------|-----------|-------|-----|--------|--------|------------|-----------|----------|---------------------------|
| 12586  | 1   | 57093209  | 57093209  | C     | A   | C      | M      | exonic     | C8A       | missense | NM_000562:p.P16H          |
| 12586  | 1   | 66485892  | 66485892  | C     | A   | C      | M      | exonic     | PDE4B     | missense | NM_001037340:p.A133E      |
| 12586  | 1   | 68677832  | 68677832  | C     | T   | C      | Y      | splicing   | RPE65     | missense | NM_000329:p.S242N         |
| 12586  | 1   | 70266524  | 70266524  | -     | T   | G      | */+T   | exonic     | LRRC7     | FS_ins   | NM_020794:p.G588fs        |
| 12586  | 1   | 70266526  | 70266526  | A     | T   | A      | W      | exonic     | LRRC7     | nonsense | NM_020794:p.K589X         |
| 12586  | 1   | 70291385  | 70291385  | G     | A   | G      | R      | exonic     | LRRC7     | missense | NM_020794:p.R1362Q        |
| 12586  | 1   | 86024657  | 86024657  | A     | T   | A      | W      | exonic     | COL24A1   | missense | NM_152890:p.L1343M        |
| 12586  | 1   | 90172413  | 90172413  | G     | T   | G      | K      | exonic     | LRRC8D    | missense | NM_018103:p.V400F         |
| 12586  | 1   | 99534948  | 99534948  | C     | A   | C      | M      | exonic     | LPPR4     | missense | NM_014839:p.P159T         |
| 12586  | 1   | 114255536 | 114255536 | G     | T   | G      | K      | exonic     | DCLRE1B   | missense | NM_022836:p.D267Y         |
| 12586  | 1   | 156783775 | 156783775 | G     | T   | G      | K      | exonic     | OR6Y1     | missense | NM_001005189:p.H249N      |
| 12586  | 1   | 157013366 | 157013366 | T     | C   | T      | Y      | exonic     | OR6N2     | missense | NM_001005278:p.I228M      |
| 12586  | 1   | 174792283 | 174792283 | T     | A   | T      | W      | exonic     | PAPPA2    | missense | NM_021936:p.F68I          |
| 12586  | 1   | 203206420 | 203206426 | GATGG | -   | G      | */-    | exonic     | NFASC     | FS_del   | NM_001005388:p.353_355del |
| 12586  | 1   | 246071401 | 246071401 | A     | T   | A      | W      | exonic     | OR11L1    | missense | NM_001001959:p.C141S      |
| 12586  | 1   | 246195900 | 246195900 | T     | A   | T      | W      | exonic     | OR2AK2    | missense | NM_001004491:p.L215H      |
| 12586  | 1   | 246636879 | 246636879 | G     | T   | G      | K      | exonic     | OR2T1     | missense | NM_030904:p.D321Y         |
| 12586  | 1   | 246752378 | 246752378 | C     | A   | C      | M      | exonic     | OR2G6     | missense | NM_001013355:p.Q270K      |
| 12586  | 2   | 36040     | 36040     | C     | A   | C      | M      | exonic     | FAM110C   | missense | NM_001077710:p.D116Y      |
| 12586  | 2   | 29308733  | 29308733  | G     | A   | G      | R      | exonic     | ALK       | missense | NM_004304:p.P858L         |
| 12586  | 2   | 37141282  | 37141282  | C     | A   | C      | M      | exonic     | HEATR5B   | missense | NM_019024:p.G599C         |
| 12586  | 2   | 86560909  | 86560909  | A     | T   | A      | W      | exonic     | KDM3A     | missense | NM_018433:p.S809C         |
| 12586  | 2   | 122202349 | 122202349 | C     | A   | C      | M      | exonic     | MK1671P   | missense | NM_032390:p.K226N         |
| 12586  | 2   | 131236210 | 131236210 | A     | C   | A      | M      | exonic     | FAM123C   | missense | NM_001105195:p.E32A       |
| 12586  | 2   | 131917457 | 131917457 | C     | A   | C      | M      | ncRNA      | LOC401010 | NA       | NA                        |
| 12586  | 2   | 151922470 | 151922470 | C     | T   | C      | Y      | exonic     | TNFAIP6   | missense | NM_007115:p.T15I          |
| 12586  | 2   | 167810391 | 167810391 | G     | A   | G      | R      | exonic     | XIRP2     | missense | NM_152381:p.G1415S        |
| 12586  | 2   | 170079381 | 170079381 | A     | G   | A      | R      | exonic     | KBTBD10   | missense | NM_006063:p.R388G         |
| 12586  | 2   | 210302827 | 210302827 | C     | T   | C      | Y      | exonic     | MAP2      | missense | NM_002374:p.R1722C        |
| 12586  | 2   | 215591025 | 215591025 | C     | A   | C      | M      | exonic     | ABCA12    | missense | NM_173076:p.R578S         |
| 12586  | 3   | 46282127  | 46282127  | G     | A   | G      | R      | exonic     | CCR3      | nonsense | NM_001164680:p.W176X      |
| 12586  | 3   | 75869914  | 75869914  | C     | T   | C      | Y      | exonic     | ZNF717    | missense | NM_001128223:p.R517H      |
| 12586  | 3   | 115553043 | 115553043 | C     | A   | C      | M      | exonic     | ZBTB20    | missense | NM_001164346:p.R118L      |
| 12586  | 3   | 130470141 | 130470141 | G     | T   | G      | K      | exonic     | COG       | nonsense | NM_016128:p.E588X         |
| 12586  | 3   | 135042829 | 135042829 | G     | C   | G      | S      | exonic     | RAB6B     | nonsense | NM_016577:p.Y93X          |
| 12586  | 4   | 22024454  | 22024454  | C     | T   | C      | Y      | exonic     | GPR125    | missense | NM_145290:p.D631N         |
| 12586  | 4   | 47545094  | 47545094  | A     | G   | A      | R      | exonic     | NFXL1     | missense | NM_152995:p.F860S         |
| 12586  | 4   | 71290299  | 71290299  | G     | T   | G      | K      | UTR3       | SMR3B     | NA       | NA                        |
| 12586  | 4   | 110078433 | 110078433 | G     | T   | G      | K      | exonic     | COL25A1   | missense | NM_032518:p.P230T         |
| 12586  | 4   | 126589539 | 126589539 | G     | A   | G      | R      | exonic     | FAT4      | missense | NM_024582:p.E2640K        |
| 12586  | 5   | 11465146  | 11465146  | C     | A   | C      | M      | splicing   | CTNND2    | NA       | NA                        |
| 12586  | 5   | 13882800  | 13882800  | G     | C   | G      | S      | exonic     | DNAH5     | missense | NM_001369:p.A2088G        |
| 12586  | 5   | 24571068  | 24571068  | T     | A   | T      | W      | exonic     | CDH10     | missense | NM_006727:p.M242L         |
| 12586  | 5   | 37161125  | 37161125  | G     | A   | G      | R      | exonic     | C5orf42   | missense | NM_023073:p.P2925L        |
| 12586  | 5   | 76206962  | 76206962  | G     | T   | G      | K      | exonic     | S100Z     | missense | NM_130772:p.A8S           |
| 12586  | 5   | 132237551 | 132237551 | C     | A   | C      | M      | exonic     | LEAP2     | missense | NM_052971:p.S23Y          |
| 12586  | 5   | 137616963 | 137616963 | G     | A   | G      | R      | splicing   | GFRA3     | missense | NM_001496:p.T342M         |
| 12586  | 5   | 140690593 | 140690593 | G     | T   | G      | K      | exonic     | PCDHGA1   | missense | NM_031993:p.G53V          |
| 12586  | 5   | 140692131 | 140692131 | G     | -   | C      | */-G   | exonic     | PCDHGA1   | FS_del   | NM_031993:p.A566fs        |
| 12586  | 6   | 29177065  | 29177065  | C     | G   | C      | S      | intergenic | NA        | NA       | NA                        |
| 12586  | 6   | 29339482  | 29339482  | A     | T   | A      | W      | intergenic | NA        | NA       | NA                        |
| 12586  | 6   | 54174938  | 54174938  | C     | A   | C      | M      | exonic     | C6orf142  | missense | NM_138569:p.P354H         |
| 12586  | 6   | 69405498  | 69405498  | C     | A   | C      | M      | exonic     | BAI3      | nonsense | NM_001704:p.Y70X          |
| 12586  | 6   | 70105948  | 70105948  | C     | G   | C      | S      | exonic     | BAI3      | missense | NM_001704:p.A1097G        |
| 12586  | 6   | 76769378  | 76769378  | T     | A   | T      | W      | exonic     | IMPG1     | missense | NM_001563:p.D423V         |
| 12586  | 6   | 97160532  | 97160532  | G     | T   | G      | K      | exonic     | FHL5      | missense | NM_001170807:p.W123L      |
| 12586  | 6   | 102372975 | 102372975 | C     | A   | C      | M      | exonic     | GRIK2     | missense | NM_021956:p.T414K         |
| 12586  | 6   | 102444337 | 102444337 | G     | A   | G      | R      | exonic     | GRIK2     | missense | NM_021956:p.V552I         |
| 12586  | 6   | 117757260 | 117757260 | C     | A   | C      | M      | exonic     | ROS1      | missense | NM_002944:p.G1764V        |
| 12586  | 6   | 117757261 | 117757261 | C     | A   | C      | M      | exonic     | ROS1      | missense | NM_002944:p.G1764W        |
| 12586  | 6   | 160942049 | 160942049 | C     | G   | C      | S      | exonic     | LPA       | missense | NM_005577:p.S1006T        |
| 12586  | 7   | 36160955  | 36160955  | G     | A   | G      | R      | exonic     | EEPD1     | missense | NM_030636:p.R166H         |
| 12586  | 7   | 136351543 | 136351543 | C     | G   | C      | S      | exonic     | CHRM2     | missense | NM_001006629:p.A464G      |
| 12586  | 7   | 141125536 | 141125536 | G     | T   | G      | K      | exonic     | TAS2R4    | missense | NM_016944:p.G260V         |
| 12586  | 7   | 148482359 | 148482359 | C     | -   | T      | */-C   | exonic     | ZNF398    | FS_del   | NM_170686:p.I138fs        |
| 12586  | 7   | 150341383 | 150341383 | G     | T   | G      | K      | exonic     | NOS3      | nonsense | NM_000603:p.E1080X        |
| 12586  | 8   | 41673173  | 41673173  | G     | T   | G      | K      | exonic     | ANK1      | missense | NM_000037:p.T942K         |
| 12586  | 8   | 80841501  | 80841501  | C     | A   | C      | M      | exonic     | HEY1      | missense | NM_001040708:p.A95S       |
| 12586  | 8   | 82522116  | 82522116  | T     | C   | T      | Y      | exonic     | PMP2      | missense | NM_002677:p.M21V          |
| 12586  | 8   | 87311402  | 87311402  | A     | G   | A      | R      | exonic     | SLC7A13   | missense | NM_138817:p.F74S          |
| 12586  | 8   | 113346981 | 113346981 | C     | A   | C      | M      | exonic     | CSMD3     | missense | NM_198123:p.D3175Y        |
| 12586  | 9   | 92646131  | 92646131  | A     | G   | A      | R      | exonic     | SYK       | missense | NM_001135052:p.S44G       |
| 12586  | 9   | 102086427 | 102086427 | C     | T   | C      | Y      | exonic     | INVS      | nonsense | NM_183245:p.R597X         |
| 12586  | 9   | 118810251 | 118810251 | C     | A   | C      | M      | exonic     | ASTN2     | missense | NM_014010:p.R460M         |
| 12586  | 9   | 119016542 | 119016542 | C     | T   | C      | Y      | exonic     | ASTN2     | missense | NM_014010:p.E311K         |
| 12586  | 9   | 134972308 | 134972308 | C     | A   | C      | M      | exonic     | RALGDS    | missense | NM_006266:p.W466C         |

|       |    |           |           |   |   |   |      |            |          |          |                       |
|-------|----|-----------|-----------|---|---|---|------|------------|----------|----------|-----------------------|
| 12586 | 10 | 15295965  | 15295965  | C | A | C | M    | exonic     | FAM171A1 | missense | NM_001010924:p.R543L  |
| 12586 | 10 | 26495058  | 26495058  | G | T | G | K    | exonic     | MYO3A    | missense | NM_017433:p.C1019F    |
| 12586 | 10 | 26548162  | 26548162  | G | C | G | S    | exonic     | GAD2     | missense | NM_001134366:p.E157D  |
| 12586 | 10 | 91133979  | 91133979  | C | A | C | M    | exonic     | IFIT1B   | missense | NM_001010987:p.P310H  |
| 12586 | 10 | 100232503 | 100232503 | G | A | G | R    | exonic     | HPSE2    | missense | NM_001166246:p.T498I  |
| 12586 | 10 | 102247416 | 102247416 | C | G | C | S    | exonic     | SEC31B   | missense | NM_015490:p.C663S     |
| 12586 | 10 | 134413041 | 134413041 | G | T | G | K    | exonic     | INPP5A   | missense | NM_0055539:p.V255F    |
| 12586 | 11 | 5418896   | 5418896   | C | G | C | S    | exonic     | OR511I   | missense | NM_001005288:p.R142P  |
| 12586 | 11 | 5558910   | 5558910   | T | A | T | W    | exonic     | OR52B6   | missense | NM_001005162:p.H76Q   |
| 12586 | 11 | 22248457  | 22248457  | G | T | G | K    | exonic     | ANOS     | missense | NM_213599:p.R641L     |
| 12586 | 11 | 34068310  | 34068310  | G | C | G | S    | exonic     | CAPRIN1  | missense | NM_203364:p.L434F     |
| 12586 | 11 | 44051592  | 44051592  | A | G | A | R    | exonic     | ACCS     | missense | NM_001127219:p.Q123R  |
| 12586 | 11 | 60848077  | 60848077  | T | C | T | Y    | exonic     | DDB1     | missense | NM_001923:p.M291V     |
| 12586 | 11 | 64253033  | 64253033  | C | T | C | Y    | exonic     | RASGRP2  | missense | NM_153819:p.R550H     |
| 12586 | 11 | 64253034  | 64253034  | G | T | G | K    | exonic     | RASGRP2  | missense | NM_153819:p.R550S     |
| 12586 | 11 | 65374218  | 65374218  | C | A | C | M    | exonic     | SNX32    | missense | NM_152760:p.P92T      |
| 12586 | 11 | 75846878  | 75846878  | G | A | G | R    | exonic     | C11orf30 | missense | NM_020193:p.M83I      |
| 12586 | 11 | 107711791 | 107711791 | G | T | G | K    | exonic     | ATM      | missense | NM_000051:p.D2721Y    |
| 12586 | 11 | 109630045 | 109630045 | C | A | C | M    | splicing   | RDX      | NA       | NA                    |
| 12586 | 12 | 7531663   | 7531663   | T | A | T | W    | exonic     | CD163    | missense | NM_004244:p.S570C     |
| 12586 | 12 | 25289552  | 25289552  | C | A | C | M    | exonic     | KRAS     | missense | NM_033360:p.G12C      |
| 12586 | 12 | 50568975  | 50568975  | G | T | G | K    | intronic   | ANKRD33  | NA       | NA                    |
| 12586 | 12 | 53928128  | 53928128  | G | A | G | R    | exonic     | OR6C74   | missense | NM_001005490:p.E264K  |
| 12586 | 12 | 54840051  | 54840051  | T | G | T | K    | exonic     | MYL6     | missense | NM_079423:p.F67L      |
| 12586 | 12 | 56252681  | 56252681  | G | T | G | K    | exonic     | KIF5A    | nonsense | NM_004984:p.G541X     |
| 12586 | 12 | 95575969  | 95575969  | G | T | G | K    | intergenic | NA       | NA       | NA                    |
| 12586 | 12 | 116210333 | 116210333 | G | T | G | K    | exonic     | NOS1     | missense | NM_000620:p.D352E     |
| 12586 | 13 | 40415235  | 40415235  | T | A | T | W    | exonic     | ELF1     | missense | NM_001145353:p.D196V  |
| 12586 | 13 | 47461017  | 47461017  | C | T | C | Y    | splicing   | SUCLA2   | NA       | NA                    |
| 12586 | 14 | 19366030  | 19366030  | G | T | G | K    | exonic     | OR4N2    | missense | NM_001004723:p.V195L  |
| 12586 | 14 | 19414308  | 19414308  | G | T | G | K    | exonic     | OR4K2    | missense | NM_001005501:p.L14F   |
| 12586 | 14 | 22935332  | 22935332  | C | A | C | M    | splicing   | MYH6     | NA       | NA                    |
| 12586 | 14 | 51804820  | 51804820  | G | T | G | K    | exonic     | PTGDR    | missense | NM_000953:p.G180C     |
| 12586 | 14 | 64329799  | 64329799  | G | A | G | R    | exonic     | SPTB     | missense | NM_001024858:p.R779W  |
| 12586 | 14 | 85158014  | 85158014  | C | G | C | S    | exonic     | FLRT2    | missense | NM_013231:p.L135V     |
| 12586 | 15 | 46821518  | 46821518  | C | T | C | Y    | exonic     | CEP152   | missense | NM_001194998:p.E1303K |
| 12586 | 15 | 70478078  | 70478078  | G | T | G | K    | exonic     | TMEM202  | missense | NM_001080462:p.A38S   |
| 12586 | 15 | 89093827  | 89093827  | C | T | C | Y    | exonic     | BLM      | missense | NM_000057:p.P109S     |
| 12586 | 15 | 89093828  | 89093828  | C | T | C | Y    | exonic     | BLM      | missense | NM_000057:p.P109L     |
| 12586 | 16 | 21005814  | 21005814  | T | G | T | K    | exonic     | DNAH3    | missense | NM_017539:p.K912Q     |
| 12586 | 16 | 49343313  | 49343313  | G | T | G | K    | exonic     | CYLD     | missense | NM_001042412:p.D268Y  |
| 12586 | 16 | 83658349  | 83658349  | G | - | T | *-/G | exonic     | KIAA0513 | FS_del   | NM_014732:p.M57fs     |
| 12586 | 17 | 7693679   | 7693679   | G | T | G | K    | exonic     | KDM6B    | missense | NM_001080424:p.E1116D |
| 12586 | 17 | 10372948  | 10372948  | C | A | C | M    | exonic     | MYH2     | missense | NM_017534:p.E1176D    |
| 12586 | 17 | 10387772  | 10387772  | T | A | T | W    | exonic     | MYH2     | missense | NM_017534:p.N241I     |
| 12586 | 17 | 23898551  | 23898551  | C | A | C | M    | exonic     | UNC119   | missense | NM_005148:p.S205I     |
| 12586 | 17 | 44934502  | 44934502  | C | A | C | M    | exonic     | NGFR     | missense | NM_002507:p.L49M      |
| 12586 | 17 | 45912406  | 45912406  | G | T | G | K    | exonic     | RSAD1    | missense | NM_018346:p.G146W     |
| 12586 | 17 | 77604511  | 77604511  | G | T | G | K    | exonic     | GPS1     | missense | NM_212492:p.V76L      |
| 12586 | 18 | 12018944  | 12018944  | G | T | G | K    | exonic     | IMPA2    | missense | NM_014214:p.A235S     |
| 12586 | 18 | 21866382  | 21866382  | C | A | C | M    | exonic     | SS18     | missense | NM_005637:p.Q372H     |
| 12586 | 18 | 29792266  | 29792266  | G | A | G | R    | exonic     | NOL4     | missense | NM_001198548:p.H391Y  |
| 12586 | 18 | 32630865  | 32630865  | C | A | C | M    | exonic     | C18orf10 | missense | NM_015476:p.Q268H     |
| 12586 | 19 | 42059829  | 42059829  | G | T | G | K    | exonic     | ZNF345   | missense | NM_003419:p.G86V      |
| 12586 | 19 | 48399978  | 48399978  | C | A | C | M    | exonic     | PSG4     | missense | NM_213633:p.Q110H     |
| 12586 | 19 | 49625493  | 49625493  | A | T | A | W    | exonic     | ZNF229   | missense | NM_014518:p.C435S     |
| 12586 | 20 | 25200042  | 25200042  | A | T | A | W    | exonic     | PYGB     | missense | NM_002862:p.T150S     |
| 12586 | 20 | 35097307  | 35097307  | G | A | G | R    | exonic     | RBL1     | missense | NM_183404:p.P641L     |
| 12586 | 20 | 48629202  | 48629202  | G | T | G | K    | exonic     | PTPN1    | missense | NM_002827:p.D265Y     |
| 12586 | 20 | 51305849  | 51305849  | G | T | G | K    | exonic     | TSHZ2    | missense | NM_173485:p.R815S     |
| 12586 | 20 | 55574055  | 55574055  | C | T | C | Y    | exonic     | PCK1     | missense | NM_002591:p.T553M     |
| 12586 | 22 | 14667549  | 14667549  | C | T | C | Y    | exonic     | POTEH    | missense | NM_001136213:p.G113S  |
| 12586 | 22 | 24045884  | 24045884  | A | T | A | W    | ncRNA      | IGLL3P   | NA       | NA                    |
| 12586 | 22 | 30536572  | 30536572  | G | A | G | R    | exonic     | DEPDC5   | missense | NM_001007188:p.A464T  |
| 12586 | X  | 2955389   | 2955389   | C | A | C | M    | exonic     | ARSH     | missense | NM_001011719:p.R358S  |
| 12586 | X  | 10495154  | 10495154  | C | A | C | M    | exonic     | MID1     | missense | NM_001193280:p.C145F  |
| 12586 | X  | 15522984  | 15522984  | G | C | G | S    | exonic     | ACE2     | missense | NM_021804:p.P84A      |
| 12586 | X  | 18930954  | 18930954  | G | T | G | K    | exonic     | GPR64    | missense | NM_001184836:p.L697M  |
| 12586 | X  | 24676989  | 24676989  | G | T | G | K    | exonic     | POLA1    | missense | NM_016937:p.A969S     |
| 12586 | X  | 40343926  | 40343926  | G | T | G | K    | exonic     | ATP6AP2  | missense | NM_005765:p.A243S     |
| 12586 | X  | 46917495  | 46917495  | G | T | G | K    | exonic     | RBM10    | missense | NM_005676:p.G153C     |
| 12586 | X  | 78313413  | 78313413  | C | A | C | M    | exonic     | GPR174   | missense | NM_032553:p.P85T      |
| 12586 | X  | 86659766  | 86659766  | A | T | A | W    | exonic     | KLHL4    | missense | NM_019117:p.N72Y      |
| 12586 | X  | 125126588 | 125126588 | G | T | G | K    | exonic     | DCAF12L2 | missense | NM_001013628:p.P334Q  |
| 12586 | X  | 125126957 | 125126957 | C | A | C | M    | exonic     | DCAF12L2 | missense | NM_001013628:p.G211V  |
| 12586 | X  | 147862768 | 147862768 | G | C | G | S    | exonic     | AFF2     | missense | NM_001169122:p.D1081H |
| 12804 | 1  | 214313160 | 214313160 | G | T | G | K    | exonic     | USH2A    | nonsense | NM_206933:p.S1893X    |
| 12804 | 2  | 73306322  | 73306322  | G | C | G | S    | exonic     | SMYD5    | missense | NM_006062:p.R364P     |
| 12804 | 7  | 6047147   | 6047147   | G | A | G | R    | exonic     | EIF2AK1  | nonsense | NM_014413:p.Q341X     |



|       |    |           |           |   |   |   |      |            |          |          |                       |
|-------|----|-----------|-----------|---|---|---|------|------------|----------|----------|-----------------------|
| 12804 | 13 | 45475416  | 45475416  | G | A | G | R    | exonic     | ZC3H13   | missense | NM_015070:p.P268L     |
| 12804 | 16 | 21078248  | 21078248  | G | T | G | K    | exonic     | DNAH3    | missense | NM_017539:p.R6S       |
| 12804 | 20 | 60769686  | 60769686  | G | T | G | K    | exonic     | SLCO4A1  | missense | NM_016354:p.E539D     |
| 12804 | 20 | 61546593  | 61546593  | C | A | C | M    | exonic     | KCNQ2    | missense | NM_172106:p.A185S     |
| 12804 | X  | 9995365   | 9995365   | C | T | C | Y    | exonic     | WWC3     | nonsense | NM_015691:p.R19X      |
| 12804 | X  | 82650909  | 82650909  | G | T | G | K    | exonic     | POU3F4   | missense | NM_000307:p.E307D     |
| 12804 | X  | 153597687 | 153597687 | G | T | G | K    | exonic     | GAB3     | missense | NM_080612:p.L62I      |
| 12820 | 1  | 3635844   | 3635844   | C | T | C | Y    | exonic     | TP73     | missense | NM_001126240:p.R341W  |
| 12820 | 1  | 8312858   | 8312858   | C | A | C | M    | exonic     | SLC45A1  | missense | NM_001080397:p.L240I  |
| 12820 | 1  | 16205315  | 16205315  | C | A | C | M    | exonic     | C1orf64  | missense | NM_178840:p.P133T     |
| 12820 | 1  | 17227693  | 17227693  | C | T | C | Y    | exonic     | SDHB     | missense | NM_003000:p.D138N     |
| 12820 | 1  | 71285043  | 71285043  | G | T | G | K    | exonic     | PTGER3   | missense | NM_198716:p.S269Y     |
| 12820 | 1  | 103161526 | 103161526 | G | T | G | K    | exonic     | COL11A1  | missense | NM_001854:p.P1203Q    |
| 12820 | 1  | 146861194 | 146861194 | A | G | A | R    | exonic     | NBPF15   | missense | NM_173638:p.N648S     |
| 12820 | 1  | 148183210 | 148183210 | C | A | C | M    | exonic     | OTUD7B   | missense | NM_020205:p.G568W     |
| 12820 | 1  | 181054410 | 181054410 | G | A | G | R    | exonic     | NPL      | missense | NM_001200050:p.R171H  |
| 12820 | 1  | 194972683 | 194972683 | A | T | A | W    | exonic     | CFH      | missense | NM_000186:p.Q840H     |
| 12820 | 1  | 238436870 | 238436870 | A | T | A | W    | exonic     | FMN2     | missense | NM_020066:p.E712V     |
| 12820 | 1  | 246179540 | 246179540 | C | G | C | S    | exonic     | OR2L8    | missense | NM_001001963:p.P253R  |
| 12820 | 2  | 43818984  | 43818984  | A | T | A | W    | splicing   | PLEKHH2  | missense | NM_172069:p.T982S     |
| 12820 | 2  | 71507310  | 71507310  | G | T | G | K    | exonic     | ZNF638   | missense | NM_001014972:p.L1601F |
| 12820 | 2  | 167814324 | 167814324 | G | T | G | K    | exonic     | XIRP2    | missense | NM_152381:p.D2726Y    |
| 12820 | 2  | 205677399 | 205677399 | C | A | C | M    | exonic     | PARD3B   | missense | NM_057177:p.S170Y     |
| 12820 | 2  | 234345709 | 234345709 | A | T | A | W    | exonic     | UGT1A1   | missense | NM_019075:p.D453V     |
| 12820 | 3  | 11325456  | 11325456  | A | T | A | W    | splicing   | ATG7     | NA       | NA                    |
| 12820 | 3  | 48577862  | 48577862  | G | T | G | K    | exonic     | COL7A1   | missense | NM_000094:p.H2838N    |
| 12820 | 3  | 120106185 | 120106185 | C | T | C | Y    | splicing   | IGSF11   | missense | NM_152538:p.R284K     |
| 12820 | 3  | 121872071 | 121872071 | T | A | T | W    | splicing   | HGD      | NA       | NA                    |
| 12820 | 3  | 126780571 | 126780571 | T | C | T | Y    | exonic     | OSBPL11  | missense | NM_022776:p.T138A     |
| 12820 | 3  | 148611335 | 148611335 | T | C | T | Y    | exonic     | ZIC1     | missense | NM_003412:p.M249T     |
| 12820 | 3  | 195888988 | 195888988 | C | - | G | */-C | exonic     | FAM43A   | FS_del   | NM_153690:p.S48fs     |
| 12820 | 3  | 195888990 | 195888990 | G | T | G | K    | exonic     | FAM43A   | missense | NM_153690:p.R49L      |
| 12820 | 4  | 17439101  | 17439101  | G | A | G | R    | exonic     | NCAPG    | missense | NM_022346:p.E586K     |
| 12820 | 5  | 1087953   | 1087953   | G | A | G | R    | exonic     | NKD2     | missense | NM_033120:p.R170H     |
| 12820 | 5  | 13770423  | 13770423  | C | A | C | M    | splicing   | DNAH5    | NA       | NA                    |
| 12820 | 5  | 19519262  | 19519262  | C | G | C | S    | exonic     | CDH18    | missense | NM_001167667:p.V560L  |
| 12820 | 5  | 27024065  | 27024065  | C | G | C | S    | exonic     | CDH9     | missense | NM_016279:p.G45R      |
| 12820 | 5  | 36145839  | 36145839  | T | - | C | */-T | exonic     | LMBRD2   | FS_del   | NM_001007527:p.R586fs |
| 12820 | 5  | 37007856  | 37007856  | C | T | C | Y    | exonic     | NIPBL    | missense | NM_133433:p.P275L     |
| 12820 | 5  | 74132466  | 74132466  | T | C | T | Y    | exonic     | FAM169A  | missense | NM_015566:p.I366M     |
| 12820 | 5  | 82870925  | 82870925  | C | A | C | M    | exonic     | VCAN     | nonsense | NM_001164097:p.S1129X |
| 12820 | 5  | 89819668  | 89819668  | G | T | G | K    | exonic     | POLR3G   | missense | NM_006467:p.M71I      |
| 12820 | 5  | 140533977 | 140533977 | T | A | T | W    | exonic     | PCDHB7   | missense | NM_018940:p.F459L     |
| 12820 | 5  | 156525535 | 156525535 | C | T | C | Y    | exonic     | FAM71B   | missense | NM_130899:p.V75I      |
| 12820 | 5  | 159991937 | 159991937 | G | C | G | S    | exonic     | ATP10B   | missense | NM_025153:p.T466S     |
| 12820 | 6  | 29249672  | 29249672  | C | A | C | M    | exonic     | OR2J2    | nonsense | NM_030905:p.S94X      |
| 12820 | 6  | 152664774 | 152664774 | C | A | C | M    | exonic     | SYNE1    | nonsense | NM_182961:p.E5822X    |
| 12820 | 7  | 21923030  | 21923030  | T | C | T | Y    | exonic     | CDCA7L   | missense | NM_001127371:p.K11R   |
| 12820 | 7  | 34854801  | 34854801  | G | T | G | K    | splicing   | NPSR1    | NA       | NA                    |
| 12820 | 7  | 36412555  | 36412555  | G | C | G | S    | exonic     | ANLN     | missense | NM_018685:p.G243A     |
| 12820 | 7  | 38223430  | 38223430  | C | T | C | Y    | splicing   | STARD3NL | silent   | NM_032016:p.N184N     |
| 12820 | 7  | 81169946  | 81169946  | C | G | C | S    | exonic     | HGF      | missense | NM_000601:p.V692L     |
| 12820 | 7  | 95638731  | 95638731  | T | C | T | Y    | exonic     | SLC25A13 | missense | NM_014251:p.I407V     |
| 12820 | 7  | 99272028  | 99272028  | C | A | C | M    | exonic     | CYP3A43  | missense | NM_057096:p.H30N      |
| 12820 | 7  | 100017608 | 100017608 | G | A | G | R    | exonic     | LRCH4    | nonsense | NM_002319:p.R162X     |
| 12820 | 7  | 134773617 | 134773617 | C | A | C | M    | exonic     | CNOT4    | missense | NM_001190848:p.M1I    |
| 12820 | 7  | 139728729 | 139728729 | C | A | C | M    | exonic     | SLC37A3  | missense | NM_032295:p.V23L      |
| 12820 | 8  | 34300083  | 34300083  | C | T | C | Y    | intergenic | NA       | NA       | NA                    |
| 12820 | 8  | 95607678  | 95607678  | G | A | G | R    | exonic     | KIAA1429 | missense | NM_015496:p.A657V     |
| 12820 | 8  | 113720196 | 113720196 | G | T | G | K    | exonic     | CSMD3    | missense | NM_198123:p.T1144K    |
| 12820 | 8  | 113737583 | 113737583 | T | C | T | Y    | exonic     | CSMD3    | missense | NM_198123:p.N994D     |
| 12820 | 9  | 8508246   | 8508246   | C | A | C | M    | exonic     | PTPRD    | missense | NM_002839:p.G382V     |
| 12820 | 9  | 32625320  | 32625320  | C | G | C | S    | exonic     | TAF1L    | missense | NM_153809:p.L86F      |
| 12820 | 9  | 130865644 | 130865644 | G | C | G | S    | splicing   | FAM73B   | NA       | NA                    |
| 12820 | 9  | 133095947 | 133095947 | G | T | G | K    | exonic     | NUP214   | nonsense | NM_005085:p.G2062X    |
| 12820 | 9  | 137579612 | 137579612 | C | A | C | M    | exonic     | OBP2A    | missense | NM_014582:p.R118S     |
| 12820 | 10 | 7803746   | 7803746   | G | T | G | K    | splicing   | ITIH2    | missense | NM_002216:p.E289D     |
| 12820 | 10 | 70002261  | 70002261  | C | G | C | S    | exonic     | TET1     | missense | NM_030625:p.Q54E      |
| 12820 | 10 | 70002294  | 70002294  | A | G | A | R    | exonic     | TET1     | missense | NM_030625:p.K65E      |
| 12820 | 11 | 5687204   | 5687204   | G | T | G | K    | exonic     | TRIM22   | missense | NM_006074:p.C416F     |
| 12820 | 11 | 17390860  | 17390860  | G | C | G | S    | exonic     | ABCC8    | missense | NM_000352:p.L829V     |
| 12820 | 11 | 22340914  | 22340914  | T | A | T | W    | exonic     | SLC17A6  | missense | NM_020346:p.Y239N     |
| 12820 | 11 | 26539316  | 26539316  | C | G | C | S    | exonic     | MUC15    | missense | NM_145650:p.D293H     |
| 12820 | 11 | 48223864  | 48223864  | G | T | G | K    | exonic     | OR4X2    | missense | NM_001004727:p.M211I  |
| 12820 | 11 | 55409767  | 55409767  | A | T | A | W    | exonic     | SPRYD5   | missense | NM_032681:p.H96L      |
| 12820 | 11 | 58479666  | 58479666  | C | A | C | M    | exonic     | GlyTL1   | missense | NM_080661:p.P198T     |
| 12820 | 11 | 59702355  | 59702355  | G | T | G | K    | exonic     | MS4A6A   | missense | NM_152851:p.S98Y      |
| 12820 | 11 | 102458742 | 102458742 | C | T | C | Y    | exonic     | DCUN1D5  | missense | NM_032299:p.E96K      |
| 12820 | 12 | 7143525   | 7143525   | G | T | G | K    | intronic   | C1RL     | NA       | NA                    |

|       |    |           |           |   |   |   |      |            |         |          |                      |
|-------|----|-----------|-----------|---|---|---|------|------------|---------|----------|----------------------|
| 12820 | 12 | 20925157  | 20925157  | G | T | G | K    | exonic     | SLCO1B3 | missense | NM_019844:p.G478V    |
| 12820 | 12 | 29601162  | 29601162  | C | T | C | Y    | exonic     | TMTC1   | missense | NM_175861:p.G416E    |
| 12820 | 12 | 40786102  | 40786102  | C | A | C | M    | exonic     | GXYLT1  | missense | NM_173601:p.D217Y    |
| 12820 | 12 | 54915666  | 54915666  | C | A | C | M    | exonic     | SLC39A5 | missense | NM_001135195:p.P287Q |
| 12820 | 12 | 64143341  | 64143341  | C | T | C | Y    | exonic     | MSRB3   | missense | NM_001031679:p.P177L |
| 12820 | 12 | 77086688  | 77086688  | G | C | G | S    | exonic     | NAV3    | missense | NM_014903:p.R1631T   |
| 12820 | 12 | 117135179 | 117135179 | C | A | C | M    | exonic     | TAOK3   | missense | NM_016281:p.D248Y    |
| 12820 | 12 | 122750235 | 122750235 | A | G | A | R    | exonic     | TCTN2   | missense | NM_024809:p.I513V    |
| 12820 | 14 | 19366347  | 19366347  | G | T | G | K    | exonic     | OR4N2   | missense | NM_001004723:p.K300N |
| 12820 | 14 | 23494101  | 23494101  | C | T | C | Y    | exonic     | DHR54   | missense | NM_021004:p.A49V     |
| 12820 | 14 | 41426077  | 41426077  | G | T | G | K    | exonic     | LRFN5   | missense | NM_152447:p.V167F    |
| 12820 | 14 | 50358458  | 50358458  | T | G | T | K    | exonic     | NIN     | missense | NM_016350:p.T23P     |
| 12820 | 14 | 59143754  | 59143754  | A | T | A | W    | splicing   | RTN1    | NA       | NA                   |
| 12820 | 14 | 63589005  | 63589005  | A | T | A | W    | exonic     | SYNE2   | missense | NM_182914:p.H2874L   |
| 12820 | 14 | 65549663  | 65549663  | G | T | G | K    | intergenic | NA      | NA       | NA                   |
| 12820 | 14 | 72482460  | 72482460  | A | C | A | M    | exonic     | DCAF4   | missense | NM_181340:p.H117P    |
| 12820 | 15 | 71334094  | 71334094  | C | T | C | Y    | exonic     | NEO1    | nonsense | NM_002499:p.Q655X    |
| 12820 | 15 | 76612781  | 76612781  | G | A | G | R    | exonic     | AGPHD1  | missense | NM_001013619:p.S279N |
| 12820 | 15 | 90464749  | 90464749  | A | T | A | W    | exonic     | SLCO3A1 | missense | NM_001145044:p.I354F |
| 12820 | 16 | 46815708  | 46815708  | T | A | T | W    | exonic     | ABCC11  | missense | NM_032583:p.S177C    |
| 12820 | 16 | 82741448  | 82741448  | G | T | G | K    | splicing   | LRRCS0  | missense | NM_178452:p.G118C    |
| 12820 | 17 | 632668    | 632668    | G | A | G | R    | exonic     | RNMTL1  | silent   | NM_018146:p.G100G    |
| 12820 | 17 | 2213567   | 2213567   | G | T | G | K    | exonic     | SGSM2   | missense | NM_014853:p.R244L    |
| 12820 | 17 | 7519119   | 7519119   | T | C | T | Y    | exonic     | TP53    | missense | NM_001126117:p.H47R  |
| 12820 | 17 | 31521436  | 31521436  | A | T | A | W    | exonic     | TBC1D3B | missense | NM_001001417:p.L198H |
| 12820 | 17 | 45250192  | 45250192  | G | C | G | S    | exonic     | MYST2   | missense | NM_001199158:p.R156S |
| 12820 | 17 | 49255984  | 49255984  | C | A | C | M    | exonic     | KIF2B   | missense | NM_032559:p.H197Q    |
| 12820 | 17 | 72712973  | 72712973  | A | T | A | W    | exonic     | SEC14L1 | missense | NM_003003:p.E373D    |
| 12820 | 18 | 21060321  | 21060321  | A | C | A | M    | exonic     | ZNF521  | missense | NM_015461:p.M520R    |
| 12820 | 18 | 28514368  | 28514368  | G | T | G | K    | splicing   | KLHL14  | NA       | NA                   |
| 12820 | 18 | 38808093  | 38808093  | G | A | G | R    | exonic     | RIT2    | nonsense | NM_002930:p.Q60X     |
| 12820 | 19 | 19499853  | 19499853  | C | T | C | Y    | exonic     | NDUFA13 | missense | NM_015965:p.P118L    |
| 12820 | 19 | 23907135  | 23907135  | A | T | A | W    | intergenic | NA      | NA       | NA                   |
| 12820 | 19 | 38955803  | 38955803  | T | A | T | W    | exonic     | CHST8   | missense | NM_001127895:p.Y424N |
| 12820 | 19 | 44590416  | 44590416  | C | T | C | Y    | exonic     | ZFP36   | missense | NM_003407:p.P73L     |
| 12820 | 19 | 47412944  | 47412944  | T | A | T | W    | exonic     | DEDD2   | missense | NM_133328:p.D19V     |
| 12820 | 19 | 49228281  | 49228281  | A | T | A | W    | exonic     | ZNF222  | missense | NM_013360:p.Q205L    |
| 12820 | 19 | 52536000  | 52536000  | G | A | G | R    | exonic     | GPR77   | missense | NM_018485:p.R35H     |
| 12820 | 19 | 52688201  | 52688201  | C | T | C | Y    | exonic     | NAPA    | missense | NM_003827:p.E155K    |
| 12820 | 19 | 53614677  | 53614677  | A | G | A | R    | exonic     | GRIN2D  | missense | NM_000836:p.I629V    |
| 12820 | 19 | 57561345  | 57561345  | C | T | C | Y    | exonic     | ZNF610  | missense | NM_173530:p.S301L    |
| 12820 | 19 | 58359937  | 58359937  | T | A | T | W    | exonic     | ZNF665  | nonsense | NM_024733:p.K540X    |
| 12820 | 19 | 58650422  | 58650422  | A | G | A | R    | exonic     | ZNF761  | missense | NM_001008401:p.I284V |
| 12820 | 19 | 60144146  | 60144146  | C | A | C | M    | exonic     | NLRP7   | missense | NM_206828:p.G106V    |
| 12820 | 20 | 23914302  | 23914302  | A | T | A | W    | splicing   | GGTLC1  | NA       | NA                   |
| 12820 | 22 | 23228113  | 23228113  | G | A | G | R    | exonic     | UPB1    | missense | NM_016327:p.R99H     |
| 12820 | 22 | 49024298  | 49024298  | C | A | C | M    | exonic     | TUBGCP6 | missense | NM_020461:p.D240Y    |
| 12820 | X  | 54337998  | 54337998  | G | T | G | K    | exonic     | WNK3    | missense | NM_020922:p.S469Y    |
| 12820 | X  | 65741067  | 65741067  | G | C | G | S    | exonic     | EDA2R   | nonsense | NM_021783:p.Y91X     |
| 12820 | X  | 85954789  | 85954789  | G | T | G | K    | splicing   | DACH2   | missense | NM_001139515:p.G297C |
| 12820 | X  | 90977700  | 90977700  | G | T | G | K    | splicing   | PCDH11X | NA       | NA                   |
| 12820 | X  | 91020338  | 91020338  | - | T | G | */+T | exonic     | PCDH11X | FS_ins   | NM_032969:p.V815fs   |
| 12820 | X  | 110442549 | 110442549 | G | T | G | K    | exonic     | DCX     | missense | NM_001195553:p.P340T |
| 12820 | X  | 142424567 | 142424567 | G | T | G | K    | exonic     | SPANXN3 | missense | NM_001009609:p.L57I  |
| 12820 | X  | 142794905 | 142794905 | C | A | C | M    | exonic     | UBE2NL  | missense | NM_001012989:p.Q13K  |
| 12924 | 1  | 19311641  | 19311641  | C | A | C | M    | exonic     | UBR4    | missense | NM_020765:p.R3922L   |
| 12924 | 1  | 33843582  | 33843582  | C | G | C | S    | exonic     | CSMD2   | missense | NM_052896:p.G2142A   |
| 12924 | 1  | 36698961  | 36698961  | C | G | C | S    | exonic     | MRP515  | missense | NM_031280:p.E102Q    |
| 12924 | 1  | 39679531  | 39679531  | G | C | G | S    | exonic     | MACF1   | missense | NM_033044:p.E4650Q   |
| 12924 | 1  | 67076055  | 67076055  | C | A | C | M    | exonic     | WDR78   | missense | NM_024763:p.V503F    |
| 12924 | 1  | 84650642  | 84650642  | C | A | C | M    | exonic     | DNASE2B | missense | NM_021233:p.N190K    |
| 12924 | 1  | 103222316 | 103222316 | C | A | C | M    | exonic     | COL11A1 | missense | NM_001854:p.G841V    |
| 12924 | 1  | 107669038 | 107669038 | C | G | C | S    | exonic     | NTNG1   | nonsense | NM_001113228:p.Y286X |
| 12924 | 1  | 110061543 | 110061543 | G | T | G | K    | exonic     | GSTM5   | missense | NM_000851:p.G210V    |
| 12924 | 1  | 150547961 | 150547961 | G | T | G | K    | exonic     | FLG     | missense | NM_002016:p.H2009N   |
| 12924 | 1  | 167842839 | 167842839 | G | T | G | K    | exonic     | SELP    | missense | NM_003005:p.N497K    |
| 12924 | 1  | 201406901 | 201406901 | T | A | T | W    | exonic     | MYBPH   | missense | NM_004997:p.N282Y    |
| 12924 | 1  | 201719142 | 201719142 | C | G | C | S    | exonic     | PRELP   | missense | NM_201348:p.I69M     |
| 12924 | 1  | 202402011 | 202402011 | G | T | G | K    | exonic     | REN     | missense | NM_000537:p.L12M     |
| 12924 | 1  | 202663963 | 202663963 | C | A | C | M    | exonic     | PIK3C2B | missense | NM_002646:p.L1469F   |
| 12924 | 1  | 202854551 | 202854551 | G | T | G | K    | exonic     | LRRN2   | missense | NM_006338:p.A398E    |
| 12924 | 1  | 218901829 | 218901829 | A | T | A | W    | exonic     | MARK1   | nonsense | NM_018650:p.K696X    |
| 12924 | 1  | 227652965 | 227652965 | C | G | C | S    | exonic     | NUP133  | missense | NM_018230:p.C1037S   |
| 12924 | 1  | 238559029 | 238559029 | G | T | G | K    | exonic     | FMN2    | nonsense | NM_020066:p.E1416X   |
| 12924 | 1  | 245721475 | 245721475 | C | A | C | M    | exonic     | OR2W5   | nonsense | NM_001004698:p.C141X |
| 12924 | 1  | 245721476 | 245721476 | C | G | C | S    | exonic     | OR2W5   | missense | NM_001004698:p.L142V |
| 12924 | 1  | 245902100 | 245902100 | G | T | G | K    | exonic     | OR13G1  | missense | NM_001005487:p.F289L |
| 12924 | 1  | 245988273 | 245988273 | G | C | G | S    | exonic     | OR1C1   | nonsense | NM_012353:p.S20X     |
| 12924 | 1  | 246126121 | 246126121 | G | T | G | K    | exonic     | OR2W3   | missense | NM_001001957:p.V204L |

|       |   |           |           |       |   |   |      |            |          |          |                         |
|-------|---|-----------|-----------|-------|---|---|------|------------|----------|----------|-------------------------|
| 12924 | 1 | 246636988 | 246636988 | G     | T | G | K    | exonic     | OR2T1    | missense | NM_030904:p.R357M       |
| 12924 | 1 | 246636989 | 246636989 | G     | T | G | K    | exonic     | OR2T1    | missense | NM_030904:p.R357S       |
| 12924 | 2 | 15365868  | 15365868  | C     | A | C | M    | exonic     | NBAS     | missense | NM_015909:p.A1574S      |
| 12924 | 2 | 15437187  | 15437187  | C     | A | C | M    | exonic     | NBAS     | missense | NM_015909:p.D1194Y      |
| 12924 | 2 | 15437394  | 15437394  | T     | G | T | K    | exonic     | NBAS     | missense | NM_015909:p.S1125R      |
| 12924 | 2 | 44282638  | 44282638  | G     | A | G | R    | exonic     | PPM1B    | missense | NM_001033557:p.D266N    |
| 12924 | 2 | 48541840  | 48541840  | C     | T | C | Y    | exonic     | KLRAQ1   | missense | NM_152994:p.S220L       |
| 12924 | 2 | 53978955  | 53978955  | C     | A | C | M    | exonic     | PSME4    | nonsense | NM_014614:p.E1155X      |
| 12924 | 2 | 71045120  | 71045120  | G     | A | G | R    | exonic     | ATP6V1B1 | missense | NM_001692:p.M396I       |
| 12924 | 2 | 86938803  | 86938803  | G     | T | G | K    | exonic     | CD8B     | missense | NM_172213:p.S97R        |
| 12924 | 2 | 127900247 | 127900247 | A     | T | A | W    | exonic     | PROC     | missense | NM_000312:p.T218S       |
| 12924 | 2 | 136291413 | 136291413 | C     | T | C | Y    | exonic     | LCT      | missense | NM_002299:p.G559S       |
| 12924 | 2 | 165692685 | 165692685 | C     | A | C | M    | exonic     | SCN3A    | missense | NM_001081676:p.R983I    |
| 12924 | 2 | 167812135 | 167812135 | C     | A | C | M    | exonic     | XIRP2    | missense | NM_152381:p.T1996N      |
| 12924 | 2 | 172530142 | 172530142 | C     | A | C | M    | exonic     | HAT1     | missense | NM_003642:p.P116Q       |
| 12924 | 2 | 182251148 | 182251148 | G     | A | G | R    | exonic     | NEUROD1  | missense | NM_002500:p.P229S       |
| 12924 | 2 | 182720125 | 182720125 | C     | A | C | M    | splicing   | PDE1A    | NA       | NA                      |
| 12924 | 2 | 185511661 | 185511661 | T     | C | T | Y    | exonic     | ZNF804A  | missense | NM_194250:p.I1098T      |
| 12924 | 2 | 201172637 | 201172637 | G     | T | G | K    | exonic     | AOX1     | missense | NM_001159:p.G120V       |
| 12924 | 2 | 201980520 | 201980520 | A     | T | A | W    | exonic     | TRAK2    | missense | NM_015049:p.L46Q        |
| 12924 | 2 | 210871417 | 210871417 | C     | G | C | S    | exonic     | MYL1     | missense | NM_079422:p.R48S        |
| 12924 | 2 | 216001148 | 216001148 | C     | G | C | S    | splicing   | FN1      | missense | NM_054034:p.G282R       |
| 12924 | 2 | 224170490 | 224170490 | C     | A | C | M    | exonic     | SCG2     | missense | NM_003469:p.M585I       |
| 12924 | 2 | 239701741 | 239701741 | C     | G | C | S    | exonic     | HDAC4    | missense | NM_006037:p.R574P       |
| 12924 | 3 | 16615067  | 16615067  | C     | A | C | M    | exonic     | DAZL     | nonsense | NM_001190811:p.E36X     |
| 12924 | 3 | 42702544  | 42702544  | G     | T | G | K    | exonic     | KBTBD5   | missense | NM_152393:p.D144Y       |
| 12924 | 3 | 43364914  | 43364914  | G     | A | G | R    | exonic     | SNRK     | missense | NM_017719:p.R720Q       |
| 12924 | 3 | 46038131  | 46038131  | G     | T | G | K    | exonic     | XCR1     | missense | NM_005283:p.L105I       |
| 12924 | 3 | 46374872  | 46374872  | G     | T | G | K    | exonic     | CCR2     | missense | NM_001123041:p.D284Y    |
| 12924 | 3 | 47887307  | 47887307  | C     | G | C | S    | splicing   | MAP4     | silent   | NM_002375:p.R953R       |
| 12924 | 3 | 58343344  | 58343344  | A     | T | A | W    | exonic     | PXK      | missense | NM_017771:p.I89L        |
| 12924 | 3 | 112313692 | 112313692 | G     | T | G | K    | exonic     | PVRL3    | missense | NM_015480:p.G96C        |
| 12924 | 3 | 122898003 | 122898003 | T     | A | T | W    | exonic     | GOLGB1   | nonsense | NM_004487:p.K1348X      |
| 12924 | 3 | 137528753 | 137528753 | C     | A | C | M    | exonic     | PCCB     | missense | NM_000532:p.A422E       |
| 12924 | 3 | 156317039 | 156317039 | G     | T | G | K    | exonic     | MME      | nonsense | NM_007288:p.E146X       |
| 12924 | 3 | 157343737 | 157343737 | C     | A | C | M    | exonic     | KCNAB1   | missense | NM_003471:p.L26I        |
| 12924 | 3 | 166191937 | 166191937 | C     | T | C | Y    | exonic     | SI       | missense | NM_001041:p.G1669E      |
| 12924 | 3 | 187852781 | 187852781 | C     | A | C | M    | exonic     | FETUB    | missense | NM_014375:p.N272K       |
| 12924 | 3 | 198723629 | 198723629 | C     | G | C | S    | exonic     | BDH1     | missense | NM_203315:p.R189P       |
| 12924 | 4 | 40046028  | 40046028  | C     | - | T | */-C | exonic     | CHRNA9   | FS_del   | NM_017581:c.738_738delC |
| 12924 | 4 | 45755269  | 45755269  | G     | T | G | K    | exonic     | GABRG1   | missense | NM_173536:p.H251Q       |
| 12924 | 4 | 48331121  | 48331121  | C     | A | C | M    | exonic     | FRYL     | missense | NM_015030:p.A22S        |
| 12924 | 4 | 55665621  | 55665621  | G     | A | G | R    | exonic     | KDR      | nonsense | NM_002253:p.Q645X       |
| 12924 | 4 | 57209659  | 57209659  | C     | A | C | M    | exonic     | HOPX     | missense | NM_032495:p.R87I        |
| 12924 | 4 | 106578638 | 106578638 | C     | A | C | M    | exonic     | PPA2     | missense | NM_176869:p.W149L       |
| 12924 | 4 | 126592756 | 126592756 | G     | T | G | K    | exonic     | FAT4     | missense | NM_024582:p.S3712I      |
| 12924 | 4 | 140528680 | 140528680 | G     | A | G | R    | exonic     | NAA15    | missense | NM_057175:p.E865K       |
| 12924 | 4 | 145848821 | 145848821 | C     | A | C | M    | exonic     | HHIP     | missense | NM_022475:p.N403K       |
| 12924 | 4 | 155939392 | 155939392 | C     | T | C | Y    | exonic     | RBM46    | nonsense | NM_144979:p.Q210X       |
| 12924 | 4 | 164613809 | 164613809 | C     | G | C | S    | exonic     | TKTL2    | missense | NM_032136:p.L176F       |
| 12924 | 4 | 167135773 | 167135773 | C     | T | C | Y    | exonic     | TLL1     | missense | NM_012464:p.P209S       |
| 12924 | 4 | 177286942 | 177286942 | C     | G | C | S    | exonic     | WDR17    | missense | NM_181265:p.L284V       |
| 12924 | 5 | 24523857  | 24523857  | G     | C | G | S    | exonic     | CDH10    | missense | NM_001190450:p.A250G    |
| 12924 | 5 | 45298623  | 45298623  | G     | T | G | K    | exonic     | HCN1     | missense | NM_021072:p.N610K       |
| 12924 | 5 | 50164423  | 50164423  | G     | T | G | K    | exonic     | PARP8    | missense | NM_001178056:p.S720I    |
| 12924 | 5 | 67625011  | 67625021  | CAGTA | - | T | */-  | exonic     | PIK3R1   | FS_del   | NM_181504:c.433_443del  |
| 12924 | 5 | 112139224 | 112139224 | G     | T | G | K    | splicing   | APC      | NA       | NA                      |
| 12924 | 5 | 112139225 | 112139225 | G     | T | G | K    | splicing   | APC      | missense | NM_000038:p.R141S       |
| 12924 | 5 | 140461183 | 140461183 | C     | T | C | Y    | exonic     | PCDH3    | missense | NM_018937:p.P256S       |
| 12924 | 5 | 140496128 | 140496128 | G     | T | G | K    | exonic     | PCDH5    | missense | NM_015669:p.A310S       |
| 12924 | 5 | 141338059 | 141338059 | C     | G | C | S    | exonic     | RNF14    | missense | NM_183401:p.A105G       |
| 12924 | 5 | 152853684 | 152853684 | G     | C | G | S    | exonic     | GRIA1    | missense | NM_000827:p.G29A        |
| 12924 | 5 | 154231535 | 154231535 | G     | A | G | R    | exonic     | CNOT8    | missense | NM_004779:p.E176K       |
| 12924 | 5 | 161256709 | 161256709 | G     | T | G | K    | exonic     | GABRA1   | missense | NM_001127648:p.K358N    |
| 12924 | 5 | 161256710 | 161256710 | G     | T | G | K    | exonic     | GABRA1   | missense | NM_001127648:p.D359Y    |
| 12924 | 5 | 168032882 | 168032882 | C     | A | C | M    | exonic     | SLIT3    | missense | NM_003062:p.S1240I      |
| 12924 | 5 | 168109208 | 168109208 | A     | C | A | M    | exonic     | SLIT3    | missense | NM_003062:p.S662A       |
| 12924 | 5 | 169466096 | 169466096 | G     | T | G | K    | exonic     | FOXI1    | missense | NM_144769:p.R186L       |
| 12924 | 5 | 175958410 | 175958410 | C     | G | C | S    | exonic     | GPRIN1   | missense | NM_052899:p.R344S       |
| 12924 | 5 | 175958411 | 175958411 | C     | A | C | M    | exonic     | GPRIN1   | missense | NM_052899:p.R344M       |
| 12924 | 5 | 178977143 | 178977143 | C     | G | C | S    | exonic     | HNRNPH1  | missense | NM_005520:p.M345I       |
| 12924 | 6 | 4661105   | 4661105   | A     | T | A | W    | ncRNA      | CDYL     | NA       | NA                      |
| 12924 | 6 | 4661106   | 4661106   | G     | T | G | K    | ncRNA      | CDYL     | NA       | NA                      |
| 12924 | 6 | 10047536  | 10047536  | C     | T | C | Y    | intergenic | NA       | NA       | NA                      |
| 12924 | 6 | 21339140  | 21339140  | G     | C | G | S    | exonic     | CDKAL1   | missense | NM_017774:p.R544T       |
| 12924 | 6 | 29473063  | 29473063  | C     | A | C | M    | exonic     | OR12D2   | missense | NM_013936:p.T203K       |
| 12924 | 6 | 33025633  | 33025633  | C     | A | C | M    | exonic     | HLA-DMA  | missense | NM_006120:p.A129S       |
| 12924 | 6 | 42345060  | 42345060  | C     | A | C | M    | exonic     | TRERF1   | nonsense | NM_033502:p.G83X        |
| 12924 | 6 | 42345061  | 42345061  | C     | A | C | M    | exonic     | TRERF1   | missense | NM_033502:p.Q82H        |

|       |    |           |           |   |   |   |      |          |           |          |                       |
|-------|----|-----------|-----------|---|---|---|------|----------|-----------|----------|-----------------------|
| 12924 | 6  | 43043264  | 43043264  | C | A | C | M    | exonic   | PEX6      | missense | NM_000287:p.M568I     |
| 12924 | 6  | 43043265  | 43043265  | A | T | A | W    | exonic   | PEX6      | missense | NM_000287:p.M568K     |
| 12924 | 6  | 43751113  | 43751113  | C | A | C | M    | intronic | MRPS18A   | NA       | NA                    |
| 12924 | 6  | 64453671  | 64453671  | A | T | A | W    | exonic   | PHF3      | missense | NM_015153:p.I697L     |
| 12924 | 6  | 70934808  | 70934808  | C | A | C | M    | exonic   | COL19A1   | missense | NM_001858:p.P841T     |
| 12924 | 6  | 94022361  | 94022361  | T | C | T | Y    | exonic   | EPHA7     | missense | NM_004440:p.N763S     |
| 12924 | 6  | 132227718 | 132227718 | T | C | T | Y    | exonic   | ENPP1     | missense | NM_006208:p.Y371H     |
| 12924 | 6  | 132980509 | 132980509 | C | A | C | M    | exonic   | TAAR2     | missense | NM_001033080:p.G177W  |
| 12924 | 6  | 136510209 | 136510209 | C | A | C | M    | exonic   | PDE7B     | missense | NM_018945:p.T65N      |
| 12924 | 6  | 144851501 | 144851501 | G | - | A | *-/G | splicing | UTRN      | NA       | NA                    |
| 12924 | 6  | 151936038 | 151936038 | G | T | G | K    | exonic   | C6orf97   | nonsense | NM_025059:p.E271X     |
| 12924 | 7  | 20749080  | 20749080  | G | T | G | K    | exonic   | ABC85     | missense | NM_001163941:p.R1027L |
| 12924 | 7  | 36638166  | 36638166  | C | T | C | Y    | splicing | AOAH      | NA       | NA                    |
| 12924 | 7  | 50564455  | 50564455  | G | C | G | S    | exonic   | DDC       | missense | NM_000790:p.P172R     |
| 12924 | 7  | 51062922  | 51062922  | C | A | C | M    | exonic   | COBL      | missense | NM_015198:p.G1122V    |
| 12924 | 7  | 55878271  | 55878271  | T | A | T | W    | exonic   | 41166     | missense | NM_207366:p.Y139F     |
| 12924 | 7  | 63806231  | 63806231  | C | T | C | Y    | exonic   | ZNF107    | missense | NM_016220:p.S705L     |
| 12924 | 7  | 80123924  | 80123924  | G | T | G | K    | exonic   | CD36      | missense | NM_000072:p.V85F      |
| 12924 | 7  | 82835117  | 82835117  | G | T | G | K    | exonic   | SEMA3E    | missense | NM_001178129:p.N623K  |
| 12924 | 7  | 91550779  | 91550779  | G | C | G | S    | exonic   | AKAP9     | missense | NM_005751:p.L2840F    |
| 12924 | 7  | 98999458  | 98999458  | G | A | G | R    | exonic   | ZNF655    | missense | NM_001009958:p.S58N   |
| 12924 | 7  | 107429315 | 107429315 | C | T | C | Y    | exonic   | LAMB1     | missense | NM_002291:p.R46Q      |
| 12924 | 7  | 128886638 | 128886638 | G | T | G | K    | exonic   | FAM40B    | missense | NM_001134336:p.S462I  |
| 12924 | 7  | 140960439 | 140960439 | A | C | A | M    | exonic   | AGK       | missense | NM_018238:p.T139P     |
| 12924 | 7  | 156219709 | 156219709 | A | G | A | R    | exonic   | LMBR1     | missense | NM_022458:p.L254P     |
| 12924 | 8  | 655883    | 655883    | C | A | C | M    | exonic   | ERICH1    | missense | NM_207332:p.Q49H      |
| 12924 | 8  | 12996689  | 12996689  | T | A | T | W    | exonic   | DLC1      | missense | NM_006094:p.E722V     |
| 12924 | 8  | 19863964  | 19863964  | G | A | G | R    | exonic   | LPL       | missense | NM_000237:p.V461I     |
| 12924 | 8  | 23051360  | 23051360  | C | A | C | M    | exonic   | TNFRSF10D | missense | NM_003840:p.D377Y     |
| 12924 | 8  | 35521564  | 35521564  | C | A | C | M    | intronic | UNC5D     | NA       | NA                    |
| 12924 | 8  | 73104745  | 73104745  | A | T | A | W    | exonic   | TRPA1     | missense | NM_007332:p.V961D     |
| 12924 | 8  | 87311127  | 87311127  | G | T | G | K    | exonic   | SLC7A13   | missense | NM_138817:p.L166M     |
| 12924 | 8  | 107792181 | 107792181 | G | T | G | K    | exonic   | OXR1      | missense | NM_018002:p.V594L     |
| 12924 | 8  | 111054016 | 111054016 | C | A | C | M    | exonic   | KCNV1     | missense | NM_014379:p.G213V     |
| 12924 | 8  | 131931118 | 131931118 | C | G | C | S    | exonic   | ADCY8     | missense | NM_001115:p.C775S     |
| 12924 | 8  | 133968378 | 133968378 | G | C | G | S    | exonic   | TG        | missense | NM_003235:p.D527H     |
| 12924 | 8  | 133968397 | 133968397 | G | T | G | K    | exonic   | TG        | missense | NM_003235:p.G533V     |
| 12924 | 8  | 134176567 | 134176567 | C | A | C | M    | exonic   | TG        | missense | NM_003235:p.S2446Y    |
| 12924 | 9  | 6318795   | 6318795   | C | A | C | M    | exonic   | TPD52L3   | missense | NM_001001875:p.T67N   |
| 12924 | 9  | 32478060  | 32478060  | G | C | G | S    | exonic   | DDX58     | missense | NM_014314:p.I365M     |
| 12924 | 9  | 98054994  | 98054994  | A | T | A | W    | exonic   | HSD17B3   | missense | NM_000197:p.S99R      |
| 12924 | 9  | 102042229 | 102042229 | G | T | G | K    | exonic   | INVS      | missense | NM_183245:p.A228S     |
| 12924 | 9  | 107158366 | 107158366 | G | T | G | K    | exonic   | SLC44A1   | missense | NM_080546:p.A185S     |
| 12924 | 9  | 110664742 | 110664742 | G | A | G | R    | exonic   | ACTL7A    | missense | NM_006687:p.A107T     |
| 12924 | 9  | 138516312 | 138516312 | C | A | C | M    | exonic   | NOTCH1    | nonsense | NM_017617:p.E1812X    |
| 12924 | 9  | 139578715 | 139578715 | T | A | T | W    | exonic   | WDR85     | missense | NM_138778:p.K314M     |
| 12924 | 10 | 1056809   | 1056809   | G | T | G | K    | exonic   | IDI2      | missense | NM_033261:p.H88Q      |
| 12924 | 10 | 6546296   | 6546296   | T | A | T | W    | exonic   | PRKCQ     | missense | NM_006257:p.D477V     |
| 12924 | 10 | 14856374  | 14856374  | C | A | C | M    | exonic   | FAM107B   | missense | NM_031453:p.A99S      |
| 12924 | 10 | 18282459  | 18282459  | G | A | G | R    | exonic   | SLC39A12  | missense | NM_152725:p.G83E      |
| 12924 | 10 | 24914280  | 24914280  | C | G | C | S    | exonic   | ARHGAP21  | missense | NM_020824:p.L1648F    |
| 12924 | 10 | 53128238  | 53128238  | G | A | G | R    | exonic   | CSTF2T    | nonsense | NM_015235:p.Q360X     |
| 12924 | 10 | 60243792  | 60243792  | G | A | G | R    | intronic | BICC1     | NA       | NA                    |
| 12924 | 10 | 67418483  | 67418483  | A | T | A | W    | exonic   | CTNNA3    | missense | NM_013266:p.D746E     |
| 12924 | 10 | 69572807  | 69572807  | C | A | C | M    | exonic   | MYPN      | missense | NM_032578:p.T336K     |
| 12924 | 10 | 70177149  | 70177149  | A | G | A | R    | exonic   | CCAR1     | missense | NM_018237:p.T216A     |
| 12924 | 10 | 70695406  | 70695406  | C | A | C | M    | exonic   | HKDC1     | missense | NM_025130:p.T811K     |
| 12924 | 10 | 87474302  | 87474302  | C | G | C | S    | exonic   | GRID1     | missense | NM_017551:p.E549Q     |
| 12924 | 10 | 96437927  | 96437927  | G | T | G | K    | exonic   | CYP2C18   | missense | NM_001128925:p.M129I  |
| 12924 | 10 | 99351673  | 99351673  | G | A | G | R    | exonic   | DHPSL     | missense | NM_138413:p.C257Y     |
| 12924 | 10 | 134874980 | 134874980 | G | T | G | K    | exonic   | KNDC1     | missense | NM_152643:p.A1325S    |
| 12924 | 11 | 4747630   | 4747630   | G | T | G | K    | exonic   | OR51F1    | missense | NM_001004752:p.P32T   |
| 12924 | 11 | 4901472   | 4901472   | C | A | C | M    | exonic   | OR51G1    | missense | NM_001005237:p.R225L  |
| 12924 | 11 | 5037138   | 5037138   | C | T | C | Y    | exonic   | OR52E2    | missense | NM_001005164:p.C99Y   |
| 12924 | 11 | 5098745   | 5098745   | G | T | G | K    | exonic   | OR52A4    | missense | NM_001005222:p.L214I  |
| 12924 | 11 | 5755928   | 5755928   | C | A | C | M    | exonic   | OR52N5    | missense | NM_001001922:p.L171F  |
| 12924 | 11 | 13335039  | 13335039  | C | A | C | M    | intronic | ARNTL     | NA       | NA                    |
| 12924 | 11 | 26525602  | 26525602  | G | T | G | K    | exonic   | ANO3      | missense | NM_031418:p.L406F     |
| 12924 | 11 | 26676542  | 26676542  | G | C | G | S    | exonic   | SLC5A12   | nonsense | NM_178498:p.S313X     |
| 12924 | 11 | 36379333  | 36379333  | C | T | C | Y    | exonic   | PRR5L     | missense | NM_001160167:p.S29F   |
| 12924 | 11 | 36551982  | 36551982  | C | A | C | M    | exonic   | RAG1      | missense | NM_000448:p.H184Q     |
| 12924 | 11 | 56857003  | 56857003  | C | A | C | M    | intronic | SSRP1     | NA       | NA                    |
| 12924 | 11 | 56857011  | 56857011  | C | A | C | M    | exonic   | SSRP1     | nonsense | NM_003146:p.E179X     |
| 12924 | 11 | 58358584  | 58358584  | A | C | A | M    | exonic   | GLYATL2   | missense | NM_145016:p.V260G     |
| 12924 | 11 | 65123444  | 65123444  | G | T | G | K    | exonic   | MAP3K11   | missense | NM_002419:p.R735S     |
| 12924 | 11 | 75741084  | 75741084  | T | A | T | W    | exonic   | PRKRIR    | missense | NM_004705:p.E253V     |
| 12924 | 11 | 88222759  | 88222759  | G | C | G | S    | exonic   | GRM5      | missense | NM_000842:p.R292G     |
| 12924 | 11 | 88551511  | 88551511  | A | C | A | M    | exonic   | TYR       | missense | NM_000372:p.T248P     |
| 12924 | 11 | 92354351  | 92354351  | G | T | G | K    | exonic   | MTNR1B    | missense | NM_005959:p.G105V     |

|       |    |           |           |   |   |   |      |          |           |          |                            |
|-------|----|-----------|-----------|---|---|---|------|----------|-----------|----------|----------------------------|
| 12924 | 11 | 113440281 | 113440281 | C | T | C | Y    | exonic   | ZBTB16    | missense | NM_001018011:p.S350F       |
| 12924 | 11 | 122280229 | 122280229 | G | T | G | K    | exonic   | C11orf63  | missense | NM_199124:p.R244L          |
| 12924 | 11 | 123398954 | 123398954 | G | A | G | R    | exonic   | OR10G9    | missense | NM_001001953:p.A9T         |
| 12924 | 11 | 133618399 | 133618399 | G | C | G | S    | splicing | VPS26B    | NA       | NA                         |
| 12924 | 12 | 10133019  | 10133019  | A | T | A | W    | exonic   | CLEC1A    | missense | NM_016511:p.L62Q           |
| 12924 | 12 | 15631135  | 15631135  | C | A | C | M    | exonic   | PTPRO     | missense | NM_030668:p.T259N          |
| 12924 | 12 | 21358771  | 21358771  | A | T | A | W    | exonic   | SLCO1A2   | missense | NM_021094:p.L105Q          |
| 12924 | 12 | 38954937  | 38954937  | G | T | G | K    | exonic   | LRRK2     | missense | NM_198578:p.G606C          |
| 12924 | 12 | 50570772  | 50570772  | T | A | T | W    | exonic   | ANKRD33   | missense | NM_001130015:p.Y134N       |
| 12924 | 12 | 70316946  | 70316946  | C | A | C | M    | exonic   | ZFC3H1    | missense | NM_144982:p.R629L          |
| 12924 | 12 | 77036028  | 77036028  | C | T | C | Y    | exonic   | NAV3      | missense | NM_014903:p.H954Y          |
| 12924 | 12 | 77036052  | 77036052  | A | T | A | W    | exonic   | NAV3      | nonsense | NM_014903:p.K962X          |
| 12924 | 12 | 79763775  | 79763775  | T | A | T | W    | exonic   | LIN7A     | missense | NM_004664:p.E116D          |
| 12924 | 12 | 81775077  | 81775077  | G | A | G | R    | exonic   | TMTC2     | missense | NM_152588:p.G81R           |
| 12924 | 12 | 87084352  | 87084352  | G | A | G | R    | exonic   | TMTC3     | nonsense | NM_181783:p.W304X          |
| 12924 | 12 | 99275387  | 99275387  | G | T | G | K    | exonic   | SLC17A8   | missense | NM_001145288:p.L29F        |
| 12924 | 12 | 109652806 | 109652806 | T | C | T | Y    | exonic   | PPP1CC    | missense | NM_002710:p.Y110C          |
| 12924 | 12 | 119060141 | 119060141 | G | A | G | R    | exonic   | GCN1L1    | missense | NM_006836:p.P2114S         |
| 12924 | 13 | 24322579  | 24322579  | G | A | G | R    | exonic   | RNF17     | missense | NM_031277:p.E1068K         |
| 12924 | 13 | 25049222  | 25049222  | G | A | G | R    | exonic   | ATP8A2    | missense | NM_016529:p.M576I          |
| 12924 | 13 | 34947750  | 34947750  | A | C | A | M    | exonic   | MAB21L1   | missense | NM_005584:p.C176G          |
| 12924 | 13 | 38348391  | 38348391  | G | T | G | K    | exonic   | FREM2     | missense | NM_207361:p.D2806Y         |
| 12924 | 13 | 38349381  | 38349381  | G | T | G | K    | splicing | FREM2     | NA       | NA                         |
| 12924 | 13 | 69212669  | 69212669  | G | T | G | K    | exonic   | KLHL1     | missense | NM_020866:p.P554T          |
| 12924 | 13 | 98137885  | 98137885  | C | G | C | S    | exonic   | SLC15A1   | missense | NM_005073:p.C593S          |
| 12924 | 13 | 100512332 | 100512332 | G | A | G | R    | exonic   | NALCN     | missense | NM_052867:p.R1582C         |
| 12924 | 14 | 22956241  | 22956241  | G | A | G | R    | exonic   | MYH7      | missense | NM_000257:p.H1494Y         |
| 12924 | 14 | 23616649  | 23616649  | C | A | C | M    | exonic   | CPNE6     | missense | NM_006032:p.P515H          |
| 12924 | 14 | 23915059  | 23915059  | G | C | G | S    | exonic   | NFATC4    | missense | NM_001136022:p.K719N       |
| 12924 | 14 | 50786021  | 50786021  | G | T | G | K    | exonic   | TMX1      | missense | NM_030755:p.G192V          |
| 12924 | 14 | 69314997  | 69314997  | C | T | C | Y    | exonic   | SLC10A1   | missense | NM_003049:p.C250Y          |
| 12924 | 14 | 70060165  | 70060165  | G | T | G | K    | exonic   | ADAM20    | missense | NM_003814:p.Q405K          |
| 12924 | 14 | 76345539  | 76345539  | T | C | T | Y    | exonic   | ANGEL1    | missense | NM_015305:p.S89G           |
| 12924 | 14 | 80321272  | 80321272  | C | A | C | M    | exonic   | C14orf145 | missense | NM_152446:p.R644L          |
| 12924 | 14 | 87477507  | 87477507  | C | A | C | M    | exonic   | GALC      | missense | NM_000153:p.V607F          |
| 12924 | 14 | 93113962  | 93113962  | G | T | G | K    | exonic   | KIAA1409  | missense | NM_020818:p.G568C          |
| 12924 | 14 | 94025772  | 94025772  | T | C | T | Y    | exonic   | SERPINA12 | missense | NM_173850:p.I331V          |
| 12924 | 14 | 95883411  | 95883411  | C | A | C | M    | exonic   | ATG2B     | missense | NM_018036:p.E61D           |
| 12924 | 14 | 98252409  | 98252409  | G | T | G | K    | exonic   | C14orf177 | missense | NM_182560:p.S43I           |
| 12924 | 15 | 23498271  | 23498271  | C | G | C | S    | exonic   | ATP10A    | missense | NM_024490:p.G882A          |
| 12924 | 15 | 38086513  | 38086513  | C | G | C | S    | exonic   | EIF2AK4   | missense | NM_001013703:p.P1121R      |
| 12924 | 15 | 38096102  | 38096102  | G | T | G | K    | exonic   | EIF2AK4   | missense | NM_001013703:p.K1289N      |
| 12924 | 15 | 41678398  | 41678398  | G | T | G | K    | exonic   | CKMT1B    | missense | NM_020990:p.G365C          |
| 12924 | 15 | 45840900  | 45840900  | C | G | C | S    | exonic   | SEMA6D    | missense | NM_153617:p.P143A          |
| 12924 | 15 | 62753289  | 62753289  | A | T | A | W    | exonic   | ZNF609    | missense | NM_015042:p.T395S          |
| 12924 | 15 | 63411498  | 63411498  | C | A | C | M    | splicing | IGDCC3    | NA       | NA                         |
| 12924 | 15 | 68766961  | 68766961  | C | A | C | M    | exonic   | UACA      | missense | NM_001008224:p.D179Y       |
| 12924 | 15 | 69420898  | 69420898  | A | T | A | W    | intronic | THSD4     | NA       | NA                         |
| 12924 | 15 | 70070541  | 70070541  | C | T | C | Y    | exonic   | MYO9A     | missense | NM_006901:p.R560H          |
| 12924 | 15 | 77542569  | 77542569  | C | G | C | S    | exonic   | KIAA1024  | missense | NM_015206:p.L802V          |
| 12924 | 15 | 81723674  | 81723674  | C | A | C | M    | exonic   | BNC1      | missense | NM_001717:p.V445L          |
| 12924 | 16 | 4768002   | 4768002   | T | A | T | W    | splicing | 41164     | NA       | NA                         |
| 12924 | 16 | 11737413  | 11737413  | C | A | C | M    | exonic   | TXNDC11   | missense | NM_015914:p.R144S          |
| 12924 | 16 | 20555657  | 20555657  | C | T | C | Y    | exonic   | ACSM1     | missense | NM_052956:p.D402N          |
| 12924 | 16 | 31674398  | 31674398  | T | A | T | W    | intronic | ZNF720    | NA       | NA                         |
| 12924 | 16 | 45175061  | 45175061  | C | T | C | Y    | exonic   | SHCBP1    | missense | NM_024745:p.D521N          |
| 12924 | 16 | 45263815  | 45263815  | T | C | T | Y    | exonic   | VPS35     | missense | NM_018206:p.N411D          |
| 12924 | 16 | 46699933  | 46699933  | G | T | G | K    | exonic   | ABCC12    | missense | NM_033226:p.H764N          |
| 12924 | 16 | 48227134  | 48227134  | G | C | G | S    | exonic   | ZNF423    | missense | NM_015069:p.R1144G         |
| 12924 | 16 | 54457380  | 54457380  | C | A | C | M    | exonic   | CES7      | missense | NM_001190158:p.S263I       |
| 12924 | 16 | 54465390  | 54465390  | A | C | A | M    | exonic   | CES7      | missense | NM_001190158:p.V74G        |
| 12924 | 16 | 56158919  | 56158919  | G | C | G | S    | exonic   | GPR114    | missense | NM_153837:p.A246P          |
| 12924 | 16 | 63564319  | 63564319  | G | T | G | K    | exonic   | CDH11     | missense | NM_001797:p.A460E          |
| 12924 | 16 | 68333960  | 68333960  | G | A | G | R    | exonic   | NOB1      | missense | NM_014062:p.H339Y          |
| 12924 | 16 | 70699899  | 70699899  | G | T | G | K    | exonic   | DHX38     | missense | NM_014003:p.K1049N         |
| 12924 | 16 | 70699900  | 70699900  | G | T | G | K    | exonic   | DHX38     | missense | NM_014003:p.D1050Y         |
| 12924 | 17 | 1465068   | 1465068   | C | T | C | Y    | exonic   | SLC43A2   | missense | NM_152346:p.A127T          |
| 12924 | 17 | 7520196   | 7520196   | G | - | C | */-G | exonic   | TP53      | FS_del   | NM_001126114:c.216_216delC |
| 12924 | 17 | 10341200  | 10341200  | C | A | C | M    | exonic   | MYH1      | nonsense | NM_005963:p.G1523X         |
| 12924 | 17 | 10370759  | 10370759  | G | A | G | R    | exonic   | MYH2      | nonsense | NM_017534:p.Q1357X         |
| 12924 | 17 | 15905731  | 15905731  | G | A | G | R    | exonic   | NCOR1     | nonsense | NM_006311:p.Q1864X         |
| 12924 | 17 | 69817009  | 69817009  | G | T | G | K    | exonic   | DNAI2     | missense | NM_001172810:p.D412Y       |
| 12924 | 18 | 7070396   | 7070396   | C | T | C | Y    | exonic   | LAMA1     | missense | NM_005559:p.C41Y           |
| 12924 | 18 | 30652190  | 30652190  | C | G | C | S    | exonic   | DTNA      | missense | NM_001128175:p.C258W       |
| 12924 | 18 | 43820733  | 43820733  | C | A | C | M    | exonic   | ZBTB7C    | missense | NM_001039360:p.L248F       |
| 12924 | 18 | 71126631  | 71126631  | G | T | G | K    | exonic   | TSHZ1     | missense | NM_005786:p.R49L           |
| 12924 | 18 | 71127923  | 71127923  | G | T | G | K    | exonic   | TSHZ1     | nonsense | NM_005786:p.E480X          |
| 12924 | 19 | 3930985   | 3930985   | C | G | C | S    | exonic   | EEF2      | missense | NM_001961:p.D476H          |
| 12924 | 19 | 6630508   | 6630508   | C | A | C | M    | splicing | C3        | NA       | NA                         |

|       |    |           |           |   |   |   |      |          |           |          |                           |
|-------|----|-----------|-----------|---|---|---|------|----------|-----------|----------|---------------------------|
| 12924 | 19 | 10471422  | 10471422  | G | C | G | S    | exonic   | KEAP1     | missense | NM_012289:p.H96Q          |
| 12924 | 19 | 12619281  | 12619281  | G | T | G | K    | exonic   | MAN2B1    | missense | NM_000528:p.S932R         |
| 12924 | 19 | 15512319  | 15512319  | C | A | C | M    | exonic   | CYP4F22   | missense | NM_173483:p.Q244K         |
| 12924 | 19 | 18761034  | 18761034  | G | T | G | K    | exonic   | COMP      | missense | NM_000095:p.P155T         |
| 12924 | 19 | 19232687  | 19232687  | C | T | C | Y    | exonic   | HAPLN4    | missense | NM_023002:p.R140H         |
| 12924 | 19 | 23628706  | 23628706  | C | A | C | M    | exonic   | ZNF675    | missense | NM_138330:p.G290V         |
| 12924 | 19 | 23628707  | 23628707  | C | A | C | M    | exonic   | ZNF675    | missense | NM_138330:p.G290C         |
| 12924 | 19 | 45700195  | 45700195  | G | T | G | K    | exonic   | SPTBN4    | missense | NM_020971:p.A382S         |
| 12924 | 19 | 48103881  | 48103881  | C | A | C | M    | intronic | PSG6      | NA       | NA                        |
| 12924 | 19 | 55989586  | 55989586  | C | - | G | *-/C | exonic   | ACPT      | FS_del   | NM_033068:c.922_922delC   |
| 12924 | 19 | 59451800  | 59451800  | C | A | C | M    | exonic   | LILRB5    | missense | NM_006840:p.W191C         |
| 12924 | 19 | 61394027  | 61394027  | T | A | T | W    | exonic   | ZSCAN5B   | nonsense | NM_001080456:p.K244X      |
| 12924 | 19 | 63497398  | 63497398  | G | T | G | K    | exonic   | ZNF8      | missense | NM_021089:p.G138W         |
| 12924 | 20 | 2359613   | 2359613   | T | A | T | W    | exonic   | TGM6      | missense | NM_198994:p.V636E         |
| 12924 | 20 | 24942664  | 24942664  | G | T | G | K    | exonic   | ACSS1     | missense | NM_032501:p.A462E         |
| 12924 | 20 | 25005005  | 25005005  | G | T | G | K    | exonic   | VSX1      | missense | NM_014588:p.S330R         |
| 12924 | 20 | 34493939  | 34493939  | C | - | G | *-/C | exonic   | DLGAP4    | FS_del   | NM_014902:c.405_405delC   |
| 12924 | 20 | 47297294  | 47297294  | C | T | C | Y    | exonic   | ZNFX1     | missense | NM_021035:p.E1892K        |
| 12924 | 20 | 51305004  | 51305004  | G | T | G | K    | exonic   | TSHZ2     | missense | NM_173485:p.G534W         |
| 12924 | 20 | 54257266  | 54257266  | C | T | C | Y    | UTR5     | MC3R      | NA       | NA                        |
| 12924 | 20 | 60773641  | 60773641  | C | T | C | Y    | exonic   | SLCO4A1   | missense | NM_016354:p.S707F         |
| 12924 | 21 | 13935567  | 13935567  | C | A | C | M    | exonic   | POTED     | missense | NM_174981:p.L522I         |
| 12924 | 21 | 27224160  | 27224160  | G | T | G | K    | exonic   | ADAMT55   | nonsense | NM_007038:p.S714X         |
| 12924 | 21 | 30719613  | 30719613  | A | C | A | M    | exonic   | KRTAP13-3 | nonsense | NM_181622:p.Y163X         |
| 12924 | 21 | 31041262  | 31041262  | C | A | C | M    | exonic   | KRTAP21-2 | nonsense | NM_181617:p.G44X          |
| 12924 | 21 | 32960303  | 32960303  | C | G | C | S    | exonic   | SYNJ1     | missense | NM_001160306:p.D651H      |
| 12924 | 21 | 43774123  | 43774123  | C | T | C | Y    | exonic   | HSF2BP    | missense | NM_007031:p.R315H         |
| 12924 | 21 | 44212356  | 44212356  | C | A | C | M    | exonic   | AGPAT3    | missense | NM_001037553:p.L94I       |
| 12924 | 21 | 44824720  | 44824720  | G | T | G | K    | exonic   | KRTAP10-5 | missense | NM_198694:p.A55D          |
| 12924 | 22 | 15452999  | 15452999  | G | T | G | K    | exonic   | CTSL2     | missense | NM_014406:p.P148T         |
| 12924 | 22 | 20367502  | 20367502  | C | T | C | Y    | exonic   | PPIL2     | missense | NM_148176:p.S170F         |
| 12924 | 22 | 39079039  | 39079039  | G | T | G | K    | exonic   | ADSL      | missense | NM_001123378:p.R125I      |
| 12924 | X  | 16080634  | 16080634  | C | G | C | S    | exonic   | GRPR      | missense | NM_005314:p.S367C         |
| 12924 | X  | 41087939  | 41087939  | G | T | G | K    | exonic   | DDX3X     | nonsense | NM_001193416:p.G229X      |
| 12924 | X  | 46954012  | 46954012  | A | T | A | W    | exonic   | UBA1      | missense | NM_003334:p.N662I         |
| 12924 | X  | 48535784  | 48535784  | C | A | C | M    | exonic   | GATA1     | missense | NM_002049:p.Q237K         |
| 12924 | X  | 48535785  | 48535785  | A | G | A | R    | exonic   | GATA1     | missense | NM_002049:p.Q237R         |
| 12924 | X  | 54803021  | 54803021  | G | T | G | K    | exonic   | ITIH5L    | missense | NM_198510:p.S323Y         |
| 12924 | X  | 70389164  | 70389164  | C | A | C | M    | splicing | ZMYM3     | nonsense | NM_001171163:p.G223X      |
| 12924 | X  | 83258801  | 83258801  | C | G | C | S    | exonic   | RP56KA6   | missense | NM_014496:p.G291A         |
| 12924 | X  | 129346408 | 129346408 | C | T | C | Y    | exonic   | GPR119    | missense | NM_178471:p.G232E         |
| 12924 | X  | 133984040 | 133984040 | C | T | C | Y    | exonic   | FAM127C   | missense | NM_001078173:p.R39Q       |
| 12924 | X  | 141118612 | 141118612 | T | G | T | K    | exonic   | MAGEC2    | missense | NM_016249:p.K276N         |
| 12924 | X  | 153388977 | 153388977 | C | A | C | M    | exonic   | FAM3A     | nonsense | NM_001171133:p.E104X      |
| 12924 | M  | 15052     | 15052     | T | C | T | Y    | upstream | MIR1974   | NA       | NA                        |
| 13280 | 1  | 20912629  | 20912629  | C | G | C | S    | exonic   | KIF17     | missense | NM_001122819:p.E129Q      |
| 13280 | 1  | 31210266  | 31210266  | C | A | C | M    | exonic   | PUM1      | missense | NM_014676:p.S722I         |
| 13280 | 1  | 31210269  | 31210269  | G | A | G | R    | exonic   | PUM1      | missense | NM_014676:p.S721L         |
| 13280 | 1  | 35142875  | 35142875  | G | T | G | K    | exonic   | DLGAP3    | missense | NM_001080418:p.H233N      |
| 13280 | 1  | 42976740  | 42976740  | G | T | G | K    | exonic   | CLDN19    | missense | NM_001185117:p.D109E      |
| 13280 | 1  | 71645761  | 71645761  | A | T | A | W    | exonic   | NEGR1     | missense | NM_173808:p.S341T         |
| 13280 | 1  | 93374877  | 93374877  | T | C | T | Y    | exonic   | MTF2      | missense | NM_001164392:p.L439S      |
| 13280 | 1  | 94270130  | 94270130  | C | G | C | S    | exonic   | ABCA4     | missense | NM_000350:p.R1307T        |
| 13280 | 1  | 99191312  | 99191312  | C | T | C | Y    | exonic   | LPPR5     | missense | NM_001010861:p.E175K      |
| 13280 | 1  | 109285619 | 109285619 | C | T | C | Y    | exonic   | CLCC1     | missense | NM_015127:p.E193K         |
| 13280 | 1  | 148953757 | 148953757 | C | G | C | S    | exonic   | HORMAD1   | missense | NM_032132:p.R67T          |
| 13280 | 1  | 153280704 | 153280704 | C | T | C | Y    | exonic   | DCST1     | missense | NM_152494:p.N247Y         |
| 13280 | 1  | 154831952 | 154831952 | C | T | C | Y    | exonic   | GPATCH4   | missense | NM_015590:p.E269K         |
| 13280 | 1  | 157180366 | 157180366 | A | G | A | R    | exonic   | PYHIN1    | missense | NM_198929:p.M389V         |
| 13280 | 1  | 158518873 | 158518873 | C | A | C | M    | exonic   | PEX19     | missense | NM_002857:p.K130N         |
| 13280 | 1  | 175006868 | 175006868 | G | - | T | *-/G | exonic   | PAPPA2    | FS_del   | NM_020318:c.4644_4644delG |
| 13280 | 1  | 178507237 | 178507237 | G | A | G | R    | exonic   | LHX4      | missense | NM_033343:p.R184Q         |
| 13280 | 1  | 181117302 | 181117302 | A | G | A | R    | exonic   | DHX9      | missense | NM_001357:p.I937M         |
| 13280 | 1  | 188517414 | 188517414 | C | T | C | Y    | exonic   | FAM5C     | missense | NM_199051:p.R109H         |
| 13280 | 1  | 214917269 | 214917269 | G | A | G | R    | exonic   | ESRRG     | missense | NM_001438:p.P82S          |
| 13280 | 1  | 226399860 | 226399860 | G | A | G | R    | exonic   | GUK1      | silent   | NM_000858:p.V8V           |
| 13280 | 1  | 240330685 | 240330685 | T | C | T | Y    | exonic   | PLD5      | missense | NM_152666:p.E329G         |
| 13280 | 1  | 245080083 | 245080083 | C | G | C | S    | exonic   | AHCTF1    | missense | NM_015446:p.E1959Q        |
| 13280 | 1  | 245080115 | 245080115 | C | G | C | S    | exonic   | AHCTF1    | missense | NM_015446:p.R1948T        |
| 13280 | 1  | 246071303 | 246071303 | C | G | C | S    | exonic   | OR11L1    | missense | NM_001001959:p.Q173H      |
| 13280 | 2  | 29996425  | 29996425  | C | A | C | M    | exonic   | ALK       | missense | NM_004304:p.G202V         |
| 13280 | 2  | 39115934  | 39115934  | C | G | C | S    | exonic   | SOS1      | missense | NM_005633:p.E333Q         |
| 13280 | 2  | 45022962  | 45022962  | C | T | C | Y    | exonic   | SIX3      | missense | NM_005413:p.A72V          |
| 13280 | 2  | 64175776  | 64175776  | T | C | T | Y    | exonic   | PELI1     | missense | NM_020651:p.E274G         |
| 13280 | 2  | 65150359  | 65150359  | G | A | G | R    | exonic   | CEP68     | missense | NM_015147:p.E93K          |
| 13280 | 2  | 65150368  | 65150368  | G | C | G | S    | exonic   | CEP68     | missense | NM_015147:p.E96Q          |
| 13280 | 2  | 74609738  | 74609738  | G | T | G | K    | intronic | AUP1      | NA       | NA                        |
| 13280 | 2  | 86179376  | 86179376  | G | C | G | S    | exonic   | POLR1A    | missense | NM_015425:p.R101G         |
| 13280 | 2  | 88780674  | 88780674  | G | A | G | R    | exonic   | RPIA      | missense | NM_144563:p.V127I         |

|       |    |           |           |   |   |   |      |            |          |          |                              |
|-------|----|-----------|-----------|---|---|---|------|------------|----------|----------|------------------------------|
| 13280 | 2  | 98821013  | 98821013  | C | G | C | S    | splicing   | C2orf55  | NA       | NA                           |
| 13280 | 2  | 105258550 | 105258550 | G | C | G | S    | exonic     | TGFBRAP1 | missense | NM_001142621:p.R522G         |
| 13280 | 2  | 179323204 | 179323204 | T | A | T | W    | exonic     | TTN      | missense | NM_133379:p.E4056D           |
| 13280 | 2  | 196457681 | 196457681 | C | G | C | S    | exonic     | DNAH7    | missense | NM_018897:p.S1879T           |
| 13280 | 2  | 211956900 | 211956900 | A | T | A | W    | exonic     | ERBB4    | missense | NM_005235:p.N1204K           |
| 13280 | 2  | 233464435 | 233464435 | C | G | C | S    | exonic     | NGEF     | missense | NM_001114090:p.E291D         |
| 13280 | 3  | 15588219  | 15588219  | G | T | G | K    | exonic     | HACL1    | missense | NM_012260:p.T352N            |
| 13280 | 3  | 15617957  | 15617957  | G | T | G | K    | exonic     | HACL1    | missense | NM_012260:p.F6L              |
| 13280 | 3  | 32907330  | 32907330  | C | G | C | S    | exonic     | TRIM71   | missense | NM_001039111:p.Q544E         |
| 13280 | 3  | 49338155  | 49338155  | C | - | A | */-C | splicing   | USP4     | NA       | NA                           |
| 13280 | 3  | 114648157 | 114648157 | C | A | C | M    | exonic     | SPICE1   | missense | NM_144718:p.G828V            |
| 13280 | 3  | 128823195 | 128823195 | G | T | G | K    | splicing   | MCM2     | NA       | NA                           |
| 13280 | 3  | 137452053 | 137452053 | G | A | G | R    | exonic     | PCCB     | missense | NM_000532:p.G49E             |
| 13280 | 3  | 139598894 | 139598894 | C | T | C | Y    | exonic     | MRAS     | missense | NM_001085049:p.R78W          |
| 13280 | 4  | 8995369   | 8995369   | A | G | A | R    | intergenic | NA       | NA       | NA                           |
| 13280 | 4  | 23424814  | 23424814  | T | A | T | W    | exonic     | PPARGC1A | nonsense | NM_013261:p.K464X            |
| 13280 | 4  | 39085349  | 39085349  | G | A | G | R    | exonic     | KLB      | missense | NM_175737:p.D129N            |
| 13280 | 4  | 119956108 | 119956108 | G | T | G | K    | exonic     | SEC24D   | missense | NM_014822:p.Q207K            |
| 13280 | 4  | 123370741 | 123370741 | C | T | C | Y    | exonic     | KIAA1109 | missense | NM_015312:p.A1083V           |
| 13280 | 4  | 175834929 | 175834929 | C | A | C | M    | exonic     | GLRA3    | missense | NM_006529:p.V268F            |
| 13280 | 4  | 189161599 | 189161599 | G | T | G | K    | exonic     | ZFP42    | missense | NM_174900:p.R215L            |
| 13280 | 5  | 878334    | 878334    | T | A | T | W    | exonic     | ZDHH11   | missense | NM_024786:p.K323M            |
| 13280 | 5  | 14440669  | 14440669  | C | G | C | S    | exonic     | TRIO     | missense | NM_007118:p.F1231L           |
| 13280 | 5  | 37369432  | 37369432  | C | G | C | S    | exonic     | NUP155   | missense | NM_153485:p.D470H            |
| 13280 | 5  | 37369493  | 37369493  | C | T | C | Y    | splicing   | NUP155   | NA       | NA                           |
| 13280 | 5  | 37373686  | 37373686  | C | T | C | Y    | exonic     | NUP155   | missense | NM_153485:p.M446I            |
| 13280 | 5  | 37373739  | 37373739  | C | T | C | Y    | exonic     | NUP155   | missense | NM_153485:p.D429N            |
| 13280 | 5  | 41417931  | 41417931  | T | C | T | Y    | exonic     | PLCXD3   | missense | NM_001005473:p.Y189C         |
| 13280 | 5  | 121215873 | 121215873 | G | T | G | K    | exonic     | FTMT     | missense | NM_177478:p.V106L            |
| 13280 | 5  | 141013735 | 141013735 | G | C | G | S    | exonic     | ARAP3    | missense | NM_022481:p.T1534S           |
| 13280 | 5  | 178291635 | 178291635 | G | T | G | K    | exonic     | ZFP2     | nonsense | NM_030613:p.E239X            |
| 13280 | 6  | 31848758  | 31848758  | T | A | T | W    | exonic     | C6orf27  | missense | NM_025258:p.S347C            |
| 13280 | 6  | 31851899  | 31851899  | C | T | C | Y    | exonic     | C6orf27  | missense | NM_025258:p.A112T            |
| 13280 | 6  | 64048515  | 64048515  | G | - | T | */-G | exonic     | LGSN     | FS_del   | NM_016571:c.900_900delC      |
| 13280 | 6  | 90430930  | 90430930  | G | T | G | K    | exonic     | MDN1     | missense | NM_014611:p.Q4745K           |
| 13280 | 6  | 105836362 | 105836362 | G | A | G | R    | exonic     | PREP     | missense | NM_002726:p.T597I            |
| 13280 | 6  | 139651396 | 139651396 | C | G | C | S    | exonic     | TXLNB    | missense | NM_153235:p.E112Q            |
| 13280 | 7  | 38467426  | 38467426  | A | T | A | W    | exonic     | AMPH     | missense | NM_139316:p.S333R            |
| 13280 | 7  | 71919040  | 71919040  | C | T | C | Y    | exonic     | TYW1B    | missense | NM_001145440:p.A129T         |
| 13280 | 7  | 75797441  | 75797441  | G | T | G | K    | exonic     | YWHAG    | missense | NM_012479:p.L45M             |
| 13280 | 7  | 88802883  | 88802883  | G | T | G | K    | exonic     | ZNF804B  | missense | NM_181646:p.G884V            |
| 13280 | 7  | 117219239 | 117219239 | G | T | G | K    | exonic     | CTTNBP2  | missense | NM_033427:p.A416D            |
| 13280 | 7  | 123304420 | 123304420 | C | T | C | Y    | exonic     | HYAL4    | missense | NM_012269:p.A474V            |
| 13280 | 7  | 138744921 | 138744921 | G | C | G | S    | exonic     | LUC7L2   | missense | NM_016019:p.E254Q            |
| 13280 | 7  | 140146667 | 140146667 | C | A | C | M    | exonic     | BRAF     | missense | NM_004333:p.G315V            |
| 13280 | 7  | 150186968 | 150186968 | C | A | C | M    | exonic     | ABP1     | missense | NM_001091:p.N585K            |
| 13280 | 7  | 151566799 | 151566799 | G | A | G | R    | exonic     | MLL3     | missense | NM_170606:p.P860S            |
| 13280 | 7  | 151566804 | 151566804 | C | A | C | M    | exonic     | MLL3     | missense | NM_170606:p.W858L            |
| 13280 | 7  | 158137879 | 158137879 | C | G | C | S    | exonic     | NCAPG2   | missense | NM_017760:p.G934A            |
| 13280 | 8  | 8271638   | 8271638   | G | - | T | */-G | exonic     | SGK223   | FS_del   | NM_001080826:c.1691_1691delC |
| 13280 | 8  | 26777838  | 26777838  | G | A | G | R    | exonic     | ADRA1A   | missense | NM_033303:p.A189V            |
| 13280 | 8  | 52908782  | 52908782  | G | T | G | K    | exonic     | PCMTD1   | missense | NM_052937:p.A144E            |
| 13280 | 8  | 75389915  | 75389915  | C | A | C | M    | exonic     | JPH1     | missense | NM_020647:p.G292V            |
| 13280 | 8  | 89156080  | 89156080  | C | T | C | Y    | exonic     | MMP16    | nonsense | NM_005941:p.W364X            |
| 13280 | 8  | 96329074  | 96329074  | C | G | C | S    | exonic     | C8orf37  | missense | NM_177965:p.S191R            |
| 13280 | 8  | 110169690 | 110169690 | T | A | T | W    | exonic     | TRHR     | missense | NM_003301:p.V258E            |
| 13280 | 8  | 113306313 | 113306313 | T | A | T | W    | exonic     | CSMD3    | missense | NM_198123:p.T3663S           |
| 13280 | 8  | 124264458 | 124264458 | G | A | G | R    | exonic     | FAM83A   | missense | NM_032899:p.D61N             |
| 13280 | 8  | 133809323 | 133809323 | G | C | G | S    | exonic     | TMEM71   | missense | NM_144649:p.I174M            |
| 13280 | 8  | 133898989 | 133898989 | A | G | A | R    | intronic   | PHF20L1  | NA       | NA                           |
| 13280 | 9  | 89462824  | 89462824  | C | T | C | Y    | exonic     | DAPK1    | missense | NM_004938:p.L629F            |
| 13280 | 9  | 135434062 | 135434062 | G | T | G | K    | exonic     | FAM163B  | missense | NM_001080515:p.G135D         |
| 13280 | 9  | 137656168 | 137656168 | A | C | A | M    | exonic     | GLT6D1   | missense | NM_182974:p.W143G            |
| 13280 | 9  | 137782699 | 137782699 | G | A | G | R    | exonic     | KCNT1    | missense | NM_020822:p.G142D            |
| 13280 | 9  | 138250473 | 138250473 | G | A | G | R    | exonic     | QSOX2    | missense | NM_181701:p.S320L            |
| 13280 | 10 | 3145640   | 3145640   | G | T | G | K    | exonic     | PFKP     | missense | NM_002627:p.R434L            |
| 13280 | 10 | 25353335  | 25353335  | C | G | C | S    | exonic     | THNSL1   | missense | NM_024838:p.L393V            |
| 13280 | 10 | 45227665  | 45227665  | G | C | G | S    | exonic     | ALOX5    | missense | NM_000698:p.G151A            |
| 13280 | 10 | 64694428  | 64694428  | G | A | G | R    | exonic     | JMJD1C   | nonsense | NM_032776:p.Q146X            |
| 13280 | 11 | 6189563   | 6189563   | C | A | C | M    | exonic     | FAM160A2 | nonsense | NM_032127:p.G904X            |
| 13280 | 11 | 14471812  | 14471812  | T | G | T | K    | exonic     | COPB1    | missense | NM_016451:p.H148P            |
| 13280 | 11 | 18543026  | 18543026  | T | C | T | Y    | exonic     | UEVLD    | missense | NM_018314:p.I201V            |
| 13280 | 11 | 33265498  | 33265498  | C | G | C | S    | exonic     | HIPK3    | missense | NM_005734:p.A321G            |
| 13280 | 11 | 47135262  | 47135262  | G | T | G | K    | exonic     | C11orf49 | missense | NM_001003678:p.L188F         |
| 13280 | 11 | 49811645  | 49811645  | A | T | A | W    | intergenic | NA       | NA       | NA                           |
| 13280 | 11 | 57728188  | 57728188  | C | A | C | M    | exonic     | OR152    | missense | NM_001004459:p.M14I          |
| 13280 | 11 | 57728189  | 57728189  | A | T | A | W    | exonic     | OR152    | missense | NM_001004459:p.M14K          |
| 13280 | 11 | 64935291  | 64935291  | A | G | A | R    | exonic     | FRMD8    | missense | NM_031904:p.K427E            |
| 13280 | 11 | 65441851  | 65441851  | G | T | G | K    | exonic     | C11orf68 | missense | NM_001135635:p.F179L         |

|       |    |           |           |   |   |   |      |            |          |          |                         |
|-------|----|-----------|-----------|---|---|---|------|------------|----------|----------|-------------------------|
| 13280 | 11 | 85122763  | 85122763  | A | T | A | W    | exonic     | SYTL2    | missense | NM_001162953:p.N419K    |
| 13280 | 11 | 123771872 | 123771872 | C | T | C | Y    | exonic     | OR8B3    | missense | NM_001005467:p.E196K    |
| 13280 | 11 | 123946143 | 123946143 | T | A | T | W    | exonic     | OR8A1    | silent   | NM_001005194:p.G323G    |
| 13280 | 12 | 43555320  | 43555320  | G | A | G | R    | exonic     | NELL2    | nonsense | NM_001145107:p.Q97X     |
| 13280 | 12 | 46658065  | 46658065  | G | A | G | R    | exonic     | COL2A1   | nonsense | NM_033150:p.R967X       |
| 13280 | 12 | 51934113  | 51934113  | C | T | C | Y    | exonic     | MFSD5    | silent   | NM_001170790:p.F516F    |
| 13280 | 12 | 56150514  | 56150514  | C | A | C | M    | exonic     | GLI1     | missense | NM_001167609:p.A534E    |
| 13280 | 12 | 88521712  | 88521712  | C | G | C | S    | exonic     | ATP2B1   | missense | NM_001001323:p.R919T    |
| 13280 | 12 | 100113060 | 100113060 | C | G | C | S    | exonic     | SLC5A8   | missense | NM_145913:p.D161H       |
| 13280 | 12 | 121569346 | 121569346 | G | A | G | R    | exonic     | RSRC2    | missense | NM_023012:p.R131C       |
| 13280 | 12 | 122215901 | 122215901 | T | A | T | W    | exonic     | MPHOSPH9 | missense | NM_022782:p.T738S       |
| 13280 | 12 | 131816697 | 131816697 | G | T | G | K    | exonic     | ANKLE2   | missense | NM_015114:p.S708R       |
| 13280 | 13 | 22813667  | 22813667  | C | T | C | Y    | exonic     | SACS     | nonsense | NM_014363:p.W783X       |
| 13280 | 13 | 23342223  | 23342223  | G | T | G | K    | exonic     | MIPEP    | missense | NM_005932:p.R239S       |
| 13280 | 13 | 24382075  | 24382075  | C | T | C | Y    | exonic     | CENPJ    | missense | NM_018451:p.E240K       |
| 13280 | 13 | 38495234  | 38495234  | G | A | G | R    | exonic     | C13orf23 | missense | NM_170719:p.P178S       |
| 13280 | 13 | 47935919  | 47935919  | A | T | A | W    | exonic     | RB1      | nonsense | NM_000321:p.K720X       |
| 13280 | 13 | 52293095  | 52293095  | T | A | T | W    | intergenic | NA       | NA       | NA                      |
| 13280 | 13 | 114028535 | 114028535 | A | G | A | R    | exonic     | CDC16    | missense | NM_003903:p.N279S       |
| 13280 | 14 | 24045588  | 24045588  | A | T | A | W    | exonic     | CMA1     | missense | NM_001836:p.L91H        |
| 13280 | 14 | 44442190  | 44442190  | G | C | G | S    | exonic     | C14orf28 | missense | NM_001017923:p.L185F    |
| 13280 | 14 | 76649633  | 76649633  | C | A | C | M    | exonic     | KIAA1737 | missense | NM_033426:p.P140Q       |
| 13280 | 15 | 27796255  | 27796255  | C | T | C | Y    | exonic     | TJP1     | missense | NM_003257:p.E1352K      |
| 13280 | 15 | 47939721  | 47939721  | C | A | C | M    | exonic     | ATP8B4   | missense | NM_024837:p.V1181L      |
| 13280 | 15 | 50495705  | 50495705  | C | A | C | M    | exonic     | MYO5A    | missense | NM_001142495:p.A181S    |
| 13280 | 15 | 56072211  | 56072211  | A | T | A | W    | exonic     | ALDH1A2  | missense | NM_170697:p.F165Y       |
| 13280 | 15 | 67122118  | 67122118  | C | G | C | S    | exonic     | NOX5     | missense | NM_001184779:p.F494L    |
| 13280 | 15 | 71676430  | 71676430  | A | G | A | R    | exonic     | NPTN     | missense | NM_001161363:p.I142T    |
| 13280 | 15 | 75023256  | 75023256  | G | C | G | S    | exonic     | RCN2     | missense | NM_002902:p.D184H       |
| 13280 | 15 | 75193675  | 75193675  | C | A | C | M    | exonic     | SGK269   | missense | NM_024776:p.A1707S      |
| 13280 | 15 | 76667761  | 76667761  | A | G | A | R    | exonic     | CHRNA5   | missense | NM_000745:p.I118M       |
| 13280 | 15 | 83127820  | 83127820  | C | A | C | M    | exonic     | ZNF592   | missense | NM_014630:p.Q304K       |
| 13280 | 15 | 83127845  | 83127845  | C | T | C | Y    | exonic     | ZNF592   | missense | NM_014630:p.S312L       |
| 13280 | 15 | 83128397  | 83128397  | C | G | C | S    | exonic     | ZNF592   | missense | NM_014630:p.A496G       |
| 13280 | 16 | 2141733   | 2141733   | G | A | G | R    | exonic     | RAB26    | missense | NM_014353:p.V129I       |
| 13280 | 16 | 20399439  | 20399439  | G | T | G | K    | exonic     | ACSM2A   | missense | NM_001010845:p.W442L    |
| 13280 | 17 | 26600139  | 26600139  | C | G | C | S    | exonic     | NF1      | nonsense | NM_001042492:p.S1329X   |
| 13280 | 17 | 53407079  | 53407079  | C | A | C | M    | exonic     | VEZF1    | missense | NM_007146:p.M440I       |
| 13280 | 17 | 70461845  | 70461845  | C | A | C | M    | exonic     | C17orf28 | missense | NM_030630:p.S616I       |
| 13280 | 17 | 71264738  | 71264738  | G | A | G | R    | exonic     | ITGB4    | missense | NM_000213:p.G1725R      |
| 13280 | 17 | 71459246  | 71459246  | C | G | C | S    | exonic     | ACOX1    | missense | NM_001185039:p.E280Q    |
| 13280 | 18 | 27871231  | 27871231  | G | C | G | S    | splicing   | RNF125   | NA       | NA                      |
| 13280 | 18 | 49239652  | 49239652  | C | T | C | Y    | exonic     | DCC      | nonsense | NM_005215:p.R1149X      |
| 13280 | 19 | 3604520   | 3604520   | C | T | C | Y    | exonic     | PIP5K1C  | missense | NM_012398:p.G230D       |
| 13280 | 19 | 12244233  | 12244233  | C | G | C | S    | exonic     | ZNF44    | missense | NM_001164276:p.D661H    |
| 13280 | 19 | 12245310  | 12245310  | C | T | C | Y    | exonic     | ZNF44    | missense | NM_001164276:p.E302K    |
| 13280 | 19 | 15867324  | 15867324  | T | C | T | Y    | exonic     | CYP4F2   | missense | NM_001082:p.N112S       |
| 13280 | 19 | 16868069  | 16868069  | A | C | A | M    | exonic     | CPAMD8   | missense | NM_015692:p.L1829V      |
| 13280 | 19 | 17299498  | 17299498  | C | T | C | Y    | splicing   | ANO8     | silent   | NM_020959:p.Q806Q       |
| 13280 | 19 | 22063117  | 22063117  | C | T | C | Y    | exonic     | ZNF257   | missense | NM_033468:p.S242L       |
| 13280 | 19 | 22732666  | 22732666  | C | A | C | M    | exonic     | ZNF99    | missense | NM_001080409:p.A538S    |
| 13280 | 19 | 40492838  | 40492838  | C | A | C | M    | exonic     | MAG      | missense | NM_080600:p.R485S       |
| 13280 | 19 | 42817788  | 42817788  | T | A | T | W    | exonic     | ZFP30    | missense | NM_014898:p.E498D       |
| 13280 | 19 | 50255515  | 50255515  | G | C | G | S    | exonic     | CLASRP   | missense | NM_007056:p.E247Q       |
| 13280 | 19 | 53034920  | 53034920  | A | T | A | W    | exonic     | CRX      | missense | NM_000554:p.S262C       |
| 13280 | 19 | 53525454  | 53525454  | G | A | G | R    | exonic     | EMP3     | missense | NM_001425:p.G136E       |
| 13280 | 19 | 59005349  | 59005349  | C | G | C | S    | exonic     | NLRP12   | missense | NM_144687:p.R459T       |
| 13280 | 19 | 62531339  | 62531339  | G | T | G | K    | exonic     | ZNF543   | missense | NM_213598:p.G233W       |
| 13280 | 19 | 63144458  | 63144458  | C | G | C | S    | exonic     | ZNF256   | missense | NM_005773:p.Q510H       |
| 13280 | 19 | 63464456  | 63464456  | G | C | G | S    | exonic     | ZNF544   | missense | NM_014480:p.Q224H       |
| 13280 | 19 | 63559421  | 63559421  | T | C | T | Y    | exonic     | ZNF497   | missense | NM_198458:p.T465A       |
| 13280 | 20 | 23617569  | 23617569  | G | A | G | R    | exonic     | CST4     | missense | NM_001899:p.A13V        |
| 13280 | 20 | 31084499  | 31084499  | C | - | G | */-C | exonic     | BPIL3    | FS_del   | NM_174897:c.146_146delC |
| 13280 | 20 | 33335408  | 33335408  | C | A | C | M    | exonic     | EIF6     | missense | NM_002212:p.G60W        |
| 13280 | 20 | 36073739  | 36073739  | C | G | C | S    | exonic     | TTI1     | missense | NM_014657:p.E632Q       |
| 13280 | 22 | 22510575  | 22510575  | G | A | G | R    | exonic     | DERL3    | silent   | NM_001135751:p.F97F     |
| 13280 | 22 | 29661039  | 29661039  | G | A | G | R    | exonic     | MORC2    | missense | NM_014941:p.P579L       |
| 13280 | X  | 12537853  | 12537853  | A | G | A | R    | exonic     | FRMPD4   | missense | NM_014728:p.D84G        |
| 13280 | X  | 15751123  | 15751123  | G | A | G | R    | exonic     | ZRSR2    | missense | NM_005089:p.R429H       |
| 13280 | X  | 18503403  | 18503403  | G | C | G | S    | exonic     | CDKL5    | missense | NM_001037343:p.E52Q     |
| 13280 | X  | 23321754  | 23321754  | C | G | C | S    | exonic     | PTCHD1   | missense | NM_173495:p.S733C       |
| 13280 | X  | 46836452  | 46836452  | G | T | G | K    | exonic     | RGN      | missense | NM_004683:p.C248F       |
| 13280 | X  | 47372558  | 47372558  | G | C | G | S    | exonic     | CFP      | missense | NM_002621:p.S97C        |
| 13280 | X  | 48936733  | 48936733  | C | A | C | M    | exonic     | SYP      | missense | NM_003179:p.Q185H       |
| 13280 | X  | 50367314  | 50367314  | G | T | G | K    | exonic     | SHROOM4  | missense | NM_020717:p.H1190N      |
| 13280 | X  | 53240957  | 53240957  | C | T | C | Y    | exonic     | KDM5C    | missense | NM_001146702:p.D1040N   |
| 13280 | X  | 55050120  | 55050120  | C | G | C | S    | exonic     | APEX2    | missense | NM_014481:p.Q362E       |
| 13280 | X  | 55530119  | 55530119  | G | A | G | R    | exonic     | USP51    | missense | NM_201286:p.T660I       |
| 13280 | X  | 71789183  | 71789183  | G | T | G | K    | exonic     | PHKA1    | missense | NM_001172436:p.P394H    |



|       |    |           |           |       |   |   |   |            |            |          |                      |                            |
|-------|----|-----------|-----------|-------|---|---|---|------------|------------|----------|----------------------|----------------------------|
| 13280 | X  | 100012386 | 100012386 | T     | C | T | Y | exonic     | NOX1       | missense | NM_013955:p.Y40C     |                            |
| 13280 | X  | 117584044 | 117584044 | T     | G | T | K | exonic     | DOCK11     | missense | NM_144658:p.Y248D    |                            |
| 13280 | X  | 117584105 | 117584105 | A     | T | A | W | exonic     | DOCK11     | missense | NM_144658:p.K268I    |                            |
| 13280 | X  | 128976652 | 128976652 | C     | - | A | A | */-C       | exonic     | BCORL1   | FS_del               | NM_021946:c.2223_2223delC  |
| 13299 | 3  | 75870266  | 75870266  | A     | G | A | R | exonic     | ZNF717     | missense | NM_001128223:p.C400R |                            |
| 13299 | 3  | 75870274  | 75870274  | C     | A | C | M | exonic     | ZNF717     | missense | NM_001128223:p.C397F |                            |
| 13394 | 1  | 3309278   | 3309278   | G     | T | G | K | exonic     | PRDM16     | missense | NM_199454:p.R247L    |                            |
| 13394 | 1  | 33962809  | 33962809  | C     | A | C | M | exonic     | CSMD2      | missense | NM_052896:p.A887S    |                            |
| 13394 | 1  | 86736972  | 86736972  | C     | A | C | M | exonic     | CLCA1      | missense | NM_001285:p.P748H    |                            |
| 13394 | 1  | 92714255  | 92714255  | G     | T | G | K | exonic     | GF11       | missense | NM_005263:p.F396L    |                            |
| 13394 | 1  | 156864046 | 156864046 | A     | G | A | R | exonic     | SPTA1      | missense | NM_003126:p.L1886P   |                            |
| 13394 | 1  | 159309233 | 159309233 | C     | T | C | Y | exonic     | PVRL4      | missense | NM_030916:p.E459K    |                            |
| 13394 | 1  | 174935263 | 174935263 | G     | T | G | K | exonic     | PAPPA2     | missense | NM_020318:p.V1051L   |                            |
| 13394 | 1  | 184587837 | 184587837 | T     | A | T | W | exonic     | TPR        | missense | NM_003292:p.K788M    |                            |
| 13394 | 1  | 196163523 | 196163523 | G     | T | G | K | exonic     | LHX9       | missense | NM_001014434:p.G296C |                            |
| 13394 | 1  | 202670253 | 202670253 | T     | C | T | Y | exonic     | PIK3C2B    | missense | NM_002646:p.H1208R   |                            |
| 13394 | 1  | 245779135 | 245779135 | C     | A | C | M | exonic     | C1orf150   | silent   | NM_145278:p.R7R      |                            |
| 13394 | 2  | 58220303  | 58220303  | A     | T | A | W | splicing   | VRK2       | NA       | NA                   |                            |
| 13394 | 2  | 98219587  | 98219587  | G     | T | G | K | exonic     | VWA3B      | missense | NM_144992:p.V879F    |                            |
| 13394 | 2  | 198206729 | 198206729 | G     | T | G | K | exonic     | RFTN2      | missense | NM_144629:p.Q226K    |                            |
| 13394 | 3  | 10836396  | 10836396  | G     | T | G | K | splicing   | SLC6A11    | NA       | NA                   |                            |
| 13394 | 3  | 10836397  | 10836397  | G     | T | G | K | splicing   | SLC6A11    | missense | NM_014229:p.G131V    |                            |
| 13394 | 3  | 66532150  | 66532150  | A     | G | A | R | exonic     | LRIG1      | missense | NM_015541:p.L389P    |                            |
| 13394 | 3  | 99592638  | 99592638  | G     | C | G | S | exonic     | OR5K3      | missense | NM_001005516:p.G147R |                            |
| 13394 | 3  | 99592639  | 99592639  | G     | T | G | K | exonic     | OR5K3      | missense | NM_001005516:p.G147V |                            |
| 13394 | 4  | 125811277 | 125811277 | G     | T | G | K | exonic     | ANKRD50    | missense | NM_020337:p.Q869K    |                            |
| 13394 | 5  | 33612445  | 33612445  | G     | A | G | R | exonic     | ADAMTS12   | missense | NM_030955:p.T1148I   |                            |
| 13394 | 5  | 37184109  | 37184109  | T     | C | T | Y | exonic     | C5orf42    | missense | NM_023073:p.I2744V   |                            |
| 13394 | 6  | 3977676   | 3977676   | C     | T | C | Y | exonic     | PRPF4B     | missense | NM_003913:p.S309F    |                            |
| 13394 | 6  | 112496248 | 112496248 | T     | C | T | Y | exonic     | WISP3      | missense | NM_003880:p.L246P    |                            |
| 13394 | 7  | 34061306  | 34061306  | A     | G | A | R | exonic     | BMPER      | missense | NM_133468:p.T265A    |                            |
| 13394 | 8  | 89137533  | 89137533  | C     | A | C | M | exonic     | MMP16      | missense | NM_005941:p.G438C    |                            |
| 13394 | 8  | 92448100  | 92448100  | G     | T | G | K | exonic     | SLC26A7    | missense | NM_134266:p.Q535H    |                            |
| 13394 | 9  | 111938576 | 111938576 | G     | T | G | K | exonic     | AKAP2      | nonsense | NM_007203:p.E311X    |                            |
| 13394 | 10 | 17182203  | 17182203  | C     | A | C | M | exonic     | CUBN       | missense | NM_001081:p.M524I    |                            |
| 13394 | 10 | 18294550  | 18294550  | A     | G | A | R | exonic     | SLC39A12   | missense | NM_152725:p.N226D    |                            |
| 13394 | 10 | 50360817  | 50360817  | T     | A | T | W | exonic     | ERC6       | missense | NM_000124:p.L697F    |                            |
| 13394 | 10 | 50526646  | 50526646  | C     | A | C | M | exonic     | CHAT       | missense | NM_020984:p.L339M    |                            |
| 13394 | 10 | 79251522  | 79251522  | T     | C | T | Y | exonic     | DLG5       | missense | NM_004747:p.D909G    |                            |
| 13394 | 10 | 89675267  | 89675267  | A     | G | A | R | exonic     | PTEN       | missense | NM_000314:p.H61R     |                            |
| 13394 | 11 | 5211994   | 5211994   | G     | T | G | K | exonic     | HBD        | missense | NM_000519:p.Q40K     |                            |
| 13394 | 11 | 10439826  | 10439826  | G     | T | G | K | exonic     | AMPD3      | nonsense | NM_000480:p.E71X     |                            |
| 13394 | 11 | 128826458 | 128826458 | C     | A | C | M | exonic     | BARX2      | missense | NM_003658:p.P264Q    |                            |
| 13394 | 11 | 129792056 | 129792056 | G     | A | G | R | exonic     | ADAMTS8    | missense | NM_007037:p.A362V    |                            |
| 13394 | 12 | 38043241  | 38043241  | G     | C | G | S | exonic     | KIF21A     | missense | NM_017641:p.S315R    |                            |
| 13394 | 14 | 64078590  | 64078590  | C     | A | C | M | exonic     | HSPA2      | missense | NM_021979:p.P424T    |                            |
| 13394 | 15 | 60327039  | 60327039  | G     | A | G | R | intergenic | NA         | NA       | NA                   |                            |
| 13394 | 15 | 71963581  | 71963581  | G     | C | G | S | exonic     | TBC1D21    | missense | NM_153356:p.K103N    |                            |
| 13394 | 15 | 83206930  | 83206930  | G     | A | G | R | exonic     | ALPK3      | missense | NM_020778:p.C1599Y   |                            |
| 13394 | 15 | 83207845  | 83207845  | G     | T | G | K | exonic     | ALPK3      | missense | NM_020778:p.R1692L   |                            |
| 13394 | 15 | 99409559  | 99409559  | A     | T | A | W | exonic     | LRRK1      | missense | NM_024652:p.Y1187F   |                            |
| 13394 | 16 | 80590705  | 80590705  | G     | C | G | S | exonic     | SDR42E1    | missense | NM_145168:p.H232D    |                            |
| 13394 | 17 | 7520310   | 7520310   | G     | - | A | A | */-G       | exonic     | TP53     | FS_del               | NM_001126114:c.102_102delC |
| 13394 | 17 | 27645575  | 27645575  | G     | C | G | S | splicing   | RHBDL3     | NA       | NA                   |                            |
| 13394 | 17 | 39687558  | 39687558  | T     | C | T | Y | splicing   | SLC4A1     | NA       | NA                   |                            |
| 13394 | 17 | 68700859  | 68700859  | C     | G | C | S | exonic     | COG1       | missense | NM_018714:p.A19G     |                            |
| 13394 | 20 | 1405926   | 1405926   | T     | C | T | Y | intronic   | SIRPB2     | NA       | NA                   |                            |
| 13394 | 21 | 46356637  | 46356637  | G     | C | G | S | exonic     | COL6A2     | missense | NM_058174:p.Q144H    |                            |
| 13394 | 22 | 37554250  | 37554250  | C     | T | C | Y | exonic     | NPTXR      | missense | NM_014293:p.E280K    |                            |
| 13394 | X  | 100798410 | 100798410 | G     | A | G | R | exonic     | ARMCX2     | missense | NM_177949:p.A274V    |                            |
| 13542 | 1  | 54200653  | 54200653  | G     | C | G | S | exonic     | LRRC42     | missense | NM_052940:p.E304Q    |                            |
| 13542 | 1  | 57383576  | 57383576  | C     | A | C | M | exonic     | DAB1       | missense | NM_021080:p.C61F     |                            |
| 13542 | 1  | 70030416  | 70030416  | G     | C | G | S | exonic     | LRRC7      | missense | NM_020794:p.D98H     |                            |
| 13542 | 1  | 70593447  | 70593447  | G     | A | G | R | exonic     | HHLA3      | missense | NM_001036645:p.M75I  |                            |
| 13542 | 1  | 74421811  | 74421811  | C     | A | C | M | exonic     | LRRIQ3     | missense | NM_001105659:p.C49F  |                            |
| 13542 | 1  | 117712508 | 117712512 | TTCAA | - | C | A | */-        | exonic     | MAN1A2   | FS_del               | NM_006699:p.60_62del       |
| 13542 | 1  | 150458174 | 150458174 | G     | A | G | R | exonic     | HRNR       | missense | NM_001009931:p.S852L |                            |
| 13542 | 1  | 159762068 | 159762068 | G     | C | G | S | exonic     | HSPA6      | missense | NM_002155:p.Q332H    |                            |
| 13542 | 1  | 159762807 | 159762807 | G     | T | G | K | exonic     | HSPA6      | missense | NM_002155:p.V579F    |                            |
| 13542 | 1  | 194887810 | 194887810 | A     | T | A | W | UTR5       | CFH        | NA       | NA                   |                            |
| 13542 | 1  | 202083412 | 202083412 | G     | C | G | S | exonic     | ZC3H11A    | missense | NM_014827:p.R507P    |                            |
| 13542 | 1  | 202705205 | 202705205 | G     | C | G | S | exonic     | PIK3C2B    | missense | NM_002646:p.P117A    |                            |
| 13542 | 1  | 203954110 | 203954110 | T     | C | T | Y | exonic     | NUCKS1     | missense | NM_022731:p.K218R    |                            |
| 13542 | 1  | 212892851 | 212892851 | A     | T | A | W | exonic     | CENPF      | missense | NM_016343:p.S2740C   |                            |
| 13542 | 1  | 224896374 | 224896374 | G     | C | G | S | exonic     | ITPKB      | missense | NM_002221:p.I774M    |                            |
| 13542 | 1  | 245836265 | 245836265 | A     | T | A | W | exonic     | OR2G3      | missense | NM_001001914:p.Y252F |                            |
| 13542 | 1  | 246636973 | 246636973 | A     | G | A | R | exonic     | OR2T1      | missense | NM_030904:p.K352R    |                            |
| 13542 | 2  | 71118564  | 71118564  | C     | A | C | M | intergenic | NA         | NA       | NA                   |                            |
| 13542 | 2  | 86622901  | 86622901  | C     | G | C | S | exonic     | RNF103-VPS | missense | NM_016079:p.D31H     |                            |

|       |    |           |           |      |   |   |      |            |          |          |                        |
|-------|----|-----------|-----------|------|---|---|------|------------|----------|----------|------------------------|
| 13542 | 2  | 132098058 | 132098058 | G    | T | G | K    | ncRNA      | POTEKP   | NA       | NA                     |
| 13542 | 2  | 168732055 | 168732055 | C    | A | C | M    | splicing   | STK39    | missense | NM_013233:p.G144C      |
| 13542 | 2  | 201224015 | 201224015 | T    | A | T | W    | exonic     | AOX1     | missense | NM_001159:p.I974N      |
| 13542 | 3  | 3056782   | 3056782   | A    | G | A | R    | exonic     | CNTN4    | missense | NM_175613:p.Y414C      |
| 13542 | 3  | 39160796  | 39160796  | G    | A | G | R    | exonic     | CSRNP1   | nonsense | NM_033027:p.R206X      |
| 13542 | 3  | 42704789  | 42704789  | A    | G | A | R    | exonic     | KBTBD5   | missense | NM_152393:p.Y435C      |
| 13542 | 3  | 44857600  | 44857600  | C    | A | C | M    | exonic     | KIF15    | missense | NM_020242:p.H1151N     |
| 13542 | 3  | 125834126 | 125834126 | G    | T | G | K    | exonic     | KALRN    | missense | NM_007064:p.K85N       |
| 13542 | 3  | 141889967 | 141889967 | C    | A | C | M    | exonic     | TRIM42   | missense | NM_152616:p.Q585K      |
| 13542 | 3  | 181098721 | 181098721 | C    | T | C | Y    | exonic     | PEX5L    | missense | NM_016559:p.G34D       |
| 13542 | 4  | 985294    | 985294    | G    | A | G | R    | exonic     | IDUA     | missense | NM_000203:p.E178K      |
| 13542 | 4  | 985327    | 985327    | G    | C | G | S    | exonic     | IDUA     | missense | NM_000203:p.D189H      |
| 13542 | 4  | 39449110  | 39449110  | C    | T | C | Y    | intronic   | UBE2K    | NA       | NA                     |
| 13542 | 4  | 64957634  | 64957634  | C    | T | C | Y    | exonic     | TECL     | missense | NM_001010874:p.E11K    |
| 13542 | 4  | 159778642 | 159778642 | A    | G | A | R    | exonic     | RXFP1    | missense | NM_021634:p.Q335R      |
| 13542 | 4  | 189161626 | 189161626 | A    | G | A | R    | exonic     | ZFP42    | missense | NM_174900:p.K224R      |
| 13542 | 5  | 41349597  | 41349597  | G    | T | G | K    | exonic     | PLCXD3   | missense | NM_001005473:p.T282K   |
| 13542 | 5  | 131036112 | 131036112 | C    | A | C | M    | exonic     | FNIP1    | nonsense | NM_001008738:p.G614X   |
| 13542 | 5  | 132260182 | 132260182 | G    | T | G | K    | exonic     | AFF4     | nonsense | NM_014423:p.S680X      |
| 13542 | 5  | 140461639 | 140461639 | G    | A | G | R    | exonic     | PCDHB3   | missense | NM_018937:p.A408T      |
| 13542 | 5  | 140517330 | 140517330 | G    | A | G | R    | ncRNA      | PCDHB17  | NA       | NA                     |
| 13542 | 5  | 140553214 | 140553214 | T    | G | T | K    | exonic     | PCDHB10  | missense | NM_018930:p.F302C      |
| 13542 | 5  | 159613198 | 159613198 | C    | A | C | M    | exonic     | CCNJL    | missense | NM_024565:p.R358L      |
| 13542 | 6  | 3977627   | 3977627   | A    | G | A | R    | exonic     | PRPF4B   | missense | NM_003913:p.R293G      |
| 13542 | 6  | 26025218  | 26025218  | A    | T | A | W    | exonic     | SLC17A2  | missense | NM_005835:p.S242R      |
| 13542 | 6  | 31936332  | 31936332  | C    | A | C | M    | exonic     | NEU1     | missense | NM_000434:p.G221W      |
| 13542 | 6  | 33516680  | 33516680  | C    | T | C | Y    | exonic     | SYNGAP1  | missense | NM_006772:p.L625F      |
| 13542 | 6  | 97160504  | 97160504  | C    | G | C | S    | exonic     | FHL5     | missense | NM_001170807:p.R114G   |
| 13542 | 6  | 117716586 | 117716586 | C    | A | C | M    | exonic     | ROS1     | missense | NM_002944:p.R2269L     |
| 13542 | 6  | 131318051 | 131318051 | G    | A | G | R    | exonic     | EPB41L2  | nonsense | NM_001199389:p.Q198X   |
| 13542 | 6  | 132037094 | 132037094 | G    | T | G | K    | exonic     | ENPP3    | missense | NM_005021:p.A248S      |
| 13542 | 6  | 168795740 | 168795740 | G    | A | G | R    | exonic     | SMOC2    | missense | NM_022138:p.V409M      |
| 13542 | 7  | 30058957  | 30058957  | A    | G | A | R    | exonic     | PLEKHA8  | missense | NM_032639:p.E249G      |
| 13542 | 7  | 43513357  | 43513357  | T    | A | T | W    | exonic     | HECW1    | missense | NM_015052:p.F1243Y     |
| 13542 | 7  | 65254645  | 65254645  | G    | T | G | K    | exonic     | CRCP     | nonsense | NM_014478:p.E105X      |
| 13542 | 7  | 100017928 | 100017928 | C    | G | C | S    | exonic     | LRCH4    | missense | NM_002319:p.R104T      |
| 13542 | 7  | 107408439 | 107408439 | C    | A | C | M    | exonic     | LAMB1    | nonsense | NM_002291:p.G244X      |
| 13542 | 7  | 142284661 | 142284661 | C    | T | C | Y    | exonic     | TRPV6    | missense | NM_018646:p.R180Q      |
| 13542 | 7  | 143288843 | 143288843 | C    | A | C | M    | exonic     | OR2F1    | missense | NM_012369:p.P283T      |
| 13542 | 8  | 41641662  | 41641662  | C    | T | C | Y    | exonic     | ANK1     | missense | NM_001142445:p.V13M    |
| 13542 | 8  | 86224364  | 86224364  | -    | A | G | */+A | exonic     | LRRCC1   | FS_ins   | NM_033402:p.E404fs     |
| 13542 | 8  | 86224370  | 86224370  | C    | T | C | Y    | exonic     | LRRCC1   | missense | NM_033402:p.P406S      |
| 13542 | 8  | 87752363  | 87752363  | G    | A | G | R    | exonic     | CNGB3    | missense | NM_019098:p.R140C      |
| 13542 | 8  | 105430329 | 105430329 | A    | T | A | W    | exonic     | TM7SF4   | missense | NM_030788:p.M125L      |
| 13542 | 8  | 113767075 | 113767075 | C    | A | C | M    | exonic     | CSMD3    | missense | NM_198123:p.G740W      |
| 13542 | 8  | 142223524 | 142223524 | C    | G | C | S    | exonic     | DENND3   | missense | NM_014957:p.P160R      |
| 13542 | 9  | 2071948   | 2071948   | G    | A | G | R    | exonic     | SMARCA2  | missense | NM_139045:p.M767I      |
| 13542 | 9  | 3215139   | 3215139   | G    | C | G | S    | exonic     | RFX3     | missense | NM_134428:p.P718R      |
| 13542 | 9  | 71931050  | 71931050  | G    | A | G | R    | exonic     | MAMDC2   | missense | NM_153267:p.D267N      |
| 13542 | 9  | 83392541  | 83392541  | C    | G | C | S    | exonic     | TLE1     | missense | NM_005077:p.G618R      |
| 13542 | 9  | 85053063  | 85053063  | C    | G | C | S    | exonic     | FRMD3    | missense | NM_174938:p.E462Q      |
| 13542 | 9  | 85696184  | 85696184  | A    | T | A | W    | exonic     | KIF27    | missense | NM_017576:p.L552Q      |
| 13542 | 9  | 129750293 | 129750293 | G    | A | G | R    | exonic     | FAM102A  | missense | NM_203305:p.P23L       |
| 13542 | 9  | 134193586 | 134193586 | C    | T | C | Y    | exonic     | SETX     | missense | NM_015046:p.E1074K     |
| 13542 | 9  | 137517853 | 137517853 | C    | T | C | Y    | exonic     | KIAA0649 | missense | NM_014811:p.P559L      |
| 13542 | 10 | 18127637  | 18127637  | G    | A | G | R    | intergenic | NA       | NA       | NA                     |
| 13542 | 10 | 26895904  | 26895904  | G    | C | G | S    | exonic     | APBB1IP  | missense | NM_019043:p.K494N      |
| 13542 | 10 | 51438682  | 51438682  | A    | C | A | M    | exonic     | AGAP6    | missense | NM_001077665:p.K264T   |
| 13542 | 10 | 75535004  | 75535007  | CCGA | - | T | */-  | exonic     | VCL      | FS_del   | NM_014000:p.774_775del |
| 13542 | 11 | 5418743   | 5418743   | T    | C | T | Y    | exonic     | OR5111   | missense | NM_001005288:p.D193G   |
| 13542 | 11 | 18240268  | 18240268  | C    | A | C | M    | intergenic | NA       | NA       | NA                     |
| 13542 | 11 | 49383427  | 49383427  | T    | A | T | W    | intergenic | NA       | NA       | NA                     |
| 13542 | 11 | 55503870  | 55503870  | G    | A | G | R    | ncRNA      | OR7E5P   | NA       | NA                     |
| 13542 | 11 | 55814548  | 55814548  | C    | A | C | M    | exonic     | OR8H1    | missense | NM_001005199:p.M189I   |
| 13542 | 11 | 59028208  | 59028208  | T    | A | T | W    | exonic     | OR4D11   | missense | NM_001004706:p.L195H   |
| 13542 | 11 | 85401061  | 85401061  | T    | - | A | */-T | exonic     | PICALM   | FS_del   | NM_007166:p.N190fs     |
| 13542 | 11 | 105294748 | 105294748 | A    | G | A | R    | exonic     | GRIA4    | missense | NM_000829:p.H457R      |
| 13542 | 11 | 123405914 | 123405914 | C    | G | C | S    | exonic     | OR10G8   | missense | NM_001004464:p.I125M   |
| 13542 | 12 | 733449    | 733449    | C    | T | C | Y    | exonic     | WNK1     | missense | NM_018979:p.P153S      |
| 13542 | 12 | 33470346  | 33470346  | G    | T | G | K    | exonic     | SYT10    | nonsense | NM_198992:p.S168X      |
| 13542 | 12 | 48005912  | 48005912  | G    | T | G | K    | exonic     | TROAP    | missense | NM_005480:p.C204F      |
| 13542 | 12 | 48550649  | 48550649  | G    | T | G | K    | exonic     | FAIM2    | missense | NM_012306:p.P286T      |
| 13542 | 12 | 51171213  | 51171213  | C    | T | C | Y    | exonic     | KRT6A    | missense | NM_005554:p.E256K      |
| 13542 | 12 | 52653556  | 52653556  | C    | G | C | S    | exonic     | HOXC11   | missense | NM_014212:p.S88R       |
| 13542 | 12 | 54507422  | 54507422  | G    | A | G | R    | exonic     | DNAJC14  | nonsense | NM_032364:p.R430X      |
| 13542 | 12 | 131860882 | 131860882 | A    | T | A | W    | exonic     | GOLGA3   | missense | NM_005895:p.L1414Q     |
| 13542 | 13 | 46307669  | 46307669  | A    | T | A | W    | exonic     | HTR2A    | missense | NM_000621:p.F240L      |
| 13542 | 14 | 18187106  | 18187106  | C    | G | C | S    | intergenic | NA       | NA       | NA                     |
| 13542 | 14 | 18447759  | 18447759  | G    | T | G | K    | exonic     | OR11H12  | missense | NM_001013354:p.G56W    |

|       |    |           |           |   |   |   |      |            |            |          |                       |
|-------|----|-----------|-----------|---|---|---|------|------------|------------|----------|-----------------------|
| 13542 | 14 | 69995155  | 69995155  | A | T | A | W    | exonic     | ADAM21     | missense | NM_003813:p.N396Y     |
| 13542 | 14 | 71270204  | 71270204  | C | T | C | Y    | exonic     | SIPA1L1    | missense | NM_015556:p.P1665S    |
| 13542 | 14 | 85158674  | 85158674  | A | G | A | R    | exonic     | FLRT2      | missense | NM_013231:p.M355V     |
| 13542 | 15 | 20513937  | 20513937  | A | T | A | W    | exonic     | CYFIP1     | missense | NM_001033028:p.H308L  |
| 13542 | 15 | 75258263  | 75258263  | C | G | C | S    | exonic     | PEAK1      | missense | NM_024776:p.E1021Q    |
| 13542 | 16 | 66423859  | 66423859  | C | A | C | M    | splicing   | CENPT      | missense | NM_025082:p.R67S      |
| 13542 | 17 | 7519194   | 7519194   | C | - | G | */-C | exonic     | TP53       | FS_del   | NM_001126117:p.G22fs  |
| 13542 | 17 | 36833559  | 36833559  | C | A | C | M    | exonic     | KRT37      | missense | NM_003770:p.A186S     |
| 13542 | 17 | 55898480  | 55898480  | T | C | T | Y    | exonic     | APPBP2     | missense | NM_006380:p.Y209C     |
| 13542 | 19 | 22288835  | 22288835  | C | G | C | S    | intergenic | NA         | NA       | NA                    |
| 13542 | 19 | 56611294  | 56611294  | G | - | A | */-G | ncRNA      | LOC1001290 | NA       | NA                    |
| 13542 | 19 | 61158203  | 61158203  | A | C | A | M    | exonic     | NLRP8      | missense | NM_176811:p.T323P     |
| 13542 | 20 | 3608177   | 3608177   | C | A | C | M    | exonic     | ADAM33     | missense | NM_153202:p.D47Y      |
| 13542 | 20 | 47956423  | 47956423  | T | A | T | W    | exonic     | SPATA2     | missense | NM_001135773:p.S235C  |
| 13542 | 20 | 54461188  | 54461188  | C | T | C | Y    | exonic     | CASS4      | missense | NM_001164116:p.R517W  |
| 13542 | 20 | 54461189  | 54461189  | G | T | G | K    | exonic     | CASS4      | missense | NM_001164116:p.R517L  |
| 13542 | 22 | 35290384  | 35290384  | A | T | A | W    | exonic     | CACNG2     | missense | NM_006078:p.L311H     |
| 13542 | X  | 30783002  | 30783002  | T | C | T | Y    | exonic     | TAB3       | missense | NM_152787:p.Q234R     |
| 13542 | X  | 34060103  | 34060103  | G | A | G | R    | exonic     | FAM47A     | missense | NM_203408:p.R72C      |
| 13542 | X  | 65158919  | 65158919  | C | T | C | Y    | exonic     | VSIG4      | missense | NM_001100431:p.A277T  |
| 13542 | X  | 71789163  | 71789163  | T | A | T | W    | exonic     | PHKA1      | missense | NM_001172436:p.M401L  |
| 13542 | X  | 83611031  | 83611031  | C | T | C | Y    | exonic     | HDX        | missense | NM_001177478:p.R61K   |
| 13542 | X  | 91020927  | 91020927  | C | A | C | M    | splicing   | PCDH11X    | missense | NM_032969:p.P1011Q    |
| 13542 | X  | 99438474  | 99438474  | G | T | G | K    | exonic     | PCDH19     | missense | NM_001105243:p.D921E  |
| 13542 | X  | 100798225 | 100798225 | G | T | G | K    | exonic     | ARMCX2     | missense | NM_177949:p.P336T     |
| 13542 | X  | 135233058 | 135233058 | C | A | C | M    | exonic     | GPR112     | missense | NM_153834:p.R176S     |
| 13542 | X  | 153247933 | 153247933 | G | T | G | K    | exonic     | FLNA       | missense | NM_001456:p.P389T     |
| 13681 | 1  | 22032419  | 22032419  | G | A | G | R    | exonic     | HSPG2      | missense | NM_005529:p.P3675L    |
| 13681 | 1  | 62485813  | 62485813  | C | A | C | M    | exonic     | KANK4      | missense | NM_181712:p.M934I     |
| 13681 | 1  | 94725843  | 94725843  | G | T | G | K    | exonic     | ABCD3      | missense | NM_002858:p.A325S     |
| 13681 | 1  | 100700908 | 100700908 | G | A | G | R    | exonic     | CDC14A     | missense | NM_033312:p.G241S     |
| 13681 | 1  | 100700909 | 100700909 | G | T | G | K    | exonic     | CDC14A     | missense | NM_033312:p.G241V     |
| 13681 | 1  | 108095313 | 108095313 | C | A | C | M    | exonic     | VAV3       | missense | NM_006113:p.G403V     |
| 13681 | 1  | 144312975 | 144312975 | - | T | C | */+T | exonic     | POLR3C     | FS_ins   | NM_006468:p.S263fs    |
| 13681 | 1  | 154372508 | 154372508 | C | T | C | Y    | exonic     | LMNA       | missense | NM_170708:p.R377C     |
| 13681 | 1  | 156783703 | 156783703 | A | T | A | W    | exonic     | OR6Y1      | missense | NM_001005189:p.Y273N  |
| 13681 | 1  | 174792355 | 174792355 | A | T | A | W    | exonic     | PAPPA2     | missense | NM_021936:p.T92S      |
| 13681 | 1  | 177344821 | 177344821 | C | G | C | S    | exonic     | ABL2       | missense | NM_001168236:p.G714A  |
| 13681 | 1  | 184301102 | 184301102 | G | T | G | K    | exonic     | HMCN1      | missense | NM_031935:p.Q2541H    |
| 13681 | 1  | 194551698 | 194551698 | C | A | C | M    | exonic     | KCNT2      | missense | NM_198503:p.E810D     |
| 13681 | 2  | 27656470  | 27656470  | C | A | C | M    | exonic     | C2orf16    | missense | NM_032266:p.S1176Y    |
| 13681 | 2  | 55444590  | 55444590  | C | T | C | Y    | splicing   | CCDC88A    | silent   | NM_018084:p.E162E     |
| 13681 | 2  | 102379637 | 102379637 | C | A | C | M    | exonic     | IL18R1     | missense | NM_003855:p.H495Q     |
| 13681 | 2  | 102407169 | 102407169 | A | T | A | W    | exonic     | IL18RAP    | nonsense | NM_003853:p.K148X     |
| 13681 | 2  | 141176267 | 141176267 | C | T | C | Y    | exonic     | LRP1B      | missense | NM_018557:p.G2072E    |
| 13681 | 2  | 175666229 | 175666229 | G | A | G | R    | exonic     | ATF2       | missense | NM_001880:p.H331Y     |
| 13681 | 2  | 201142770 | 201142770 | G | A | G | R    | exonic     | BGOL2      | missense | NM_001160046:p.E205K  |
| 13681 | 3  | 4998105   | 4998105   | T | C | T | Y    | exonic     | BHLHE40    | missense | NM_003670:p.V96A      |
| 13681 | 3  | 40499188  | 40499188  | G | T | G | K    | exonic     | ZNF619     | missense | NM_001145093:p.G95V   |
| 13681 | 3  | 77230036  | 77230036  | C | T | C | Y    | exonic     | ROBO2      | nonsense | NM_001128929:p.Q62X   |
| 13681 | 3  | 101758378 | 101758378 | G | T | G | K    | exonic     | TMEM45A    | missense | NM_018004:p.G92V      |
| 13681 | 4  | 134303714 | 134303714 | G | T | G | K    | exonic     | PCDH10     | missense | NM_032961:p.G977V     |
| 13681 | 5  | 158182846 | 158182846 | T | C | T | Y    | exonic     | EBF1       | missense | NM_024007:p.M232V     |
| 13681 | 6  | 29751688  | 29751688  | C | A | C | M    | splicing   | ZFP57      | NA       | NA                    |
| 13681 | 6  | 32665427  | 32665427  | G | A | G | R    | exonic     | HLA-DRB1   | missense | NM_002124:p.S24F      |
| 13681 | 7  | 129306680 | 129306680 | G | A | G | R    | exonic     | UBE2H      | missense | NM_003344:p.I57L      |
| 13681 | 8  | 143993521 | 143993521 | C | T | C | Y    | exonic     | CYP11B2    | missense | NM_000498:p.A180T     |
| 13681 | 9  | 79175162  | 79175162  | G | T | G | K    | exonic     | VPS13A     | missense | NM_015186:p.G2919C    |
| 13681 | 9  | 89936175  | 89936175  | C | - | T | */-C | exonic     | FAM75C2    | FS_del   | NM_001166137:p.E533fs |
| 13681 | 9  | 129525322 | 129525322 | C | G | C | S    | exonic     | TTC16      | missense | NM_144965:p.A254G     |
| 13681 | 10 | 37458931  | 37458931  | C | A | C | M    | exonic     | ANKRD30A   | missense | NM_052997:p.P53H      |
| 13681 | 10 | 93758872  | 93758872  | G | T | G | K    | exonic     | BTAF1      | nonsense | NM_003972:p.E1344X    |
| 13681 | 10 | 125511458 | 125511458 | C | T | C | Y    | exonic     | CPXM2      | missense | NM_198148:p.R566Q     |
| 13681 | 11 | 5819164   | 5819164   | G | T | G | K    | exonic     | OR52E6     | nonsense | NM_001005167:p.Y180X  |
| 13681 | 11 | 18692711  | 18692711  | A | C | A | M    | exonic     | IGSF22     | missense | NM_173588:p.V523G     |
| 13681 | 11 | 21207543  | 21207543  | C | A | C | M    | exonic     | NELL1      | missense | NM_201551:p.P506T     |
| 13681 | 11 | 55162725  | 55162725  | G | A | G | R    | exonic     | OR4P4      | missense | NM_001004124:p.G106R  |
| 13681 | 11 | 67881869  | 67881869  | G | T | G | K    | exonic     | LRP5       | missense | NM_002335:p.A222S     |
| 13681 | 11 | 85074415  | 85074415  | A | G | A | R    | exonic     | CCDC89     | missense | NM_152723:p.M136T     |
| 13681 | 12 | 8091887   | 8091887   | G | C | G | S    | exonic     | FOXJ2      | missense | NM_018416:p.Q320H     |
| 13681 | 12 | 25289552  | 25289552  | C | A | C | M    | exonic     | KRAS       | missense | NM_033360:p.G12C      |
| 13681 | 12 | 51452881  | 51452881  | C | A | C | M    | exonic     | KRT76      | missense | NM_015848:p.D309Y     |
| 13681 | 12 | 77106175  | 77106175  | C | T | C | Y    | exonic     | NAV3       | missense | NM_014903:p.A1914V    |
| 13681 | 12 | 95661350  | 95661350  | T | A | T | W    | intergenic | NA         | NA       | NA                    |
| 13681 | 12 | 108159425 | 108159425 | A | T | A | W    | exonic     | ACACB      | missense | NM_001093:p.N1507Y    |
| 13681 | 13 | 99751718  | 99751718  | G | T | G | K    | exonic     | PCCA       | nonsense | NM_000282:p.E357X     |
| 13681 | 14 | 50448341  | 50448341  | T | C | T | Y    | splicing   | PYGL       | NA       | NA                    |
| 13681 | 15 | 21483383  | 21483383  | G | T | G | K    | exonic     | NDN        | missense | NM_002487:p.S25R      |
| 13681 | 15 | 49617750  | 49617750  | G | A | G | R    | exonic     | DMXL2      | missense | NM_001174117:p.H433Y  |

|       |    |           |           |     |   |   |        |            |           |           |                        |
|-------|----|-----------|-----------|-----|---|---|--------|------------|-----------|-----------|------------------------|
| 13681 | 15 | 70741812  | 70741812  | G   | A | G | R      | exonic     | GOLGA6B   | missense  | NM_018652:p.R338K      |
| 13681 | 15 | 72352174  | 72352174  | G   | T | G | K      | exonic     | CCDC33    | missense  | NM_025055:p.Q216H      |
| 13681 | 17 | 10307597  | 10307597  | C   | A | C | M      | exonic     | MYH4      | missense  | NM_017533:p.R246L      |
| 13681 | 17 | 10340160  | 10340160  | G   | T | G | K      | exonic     | MYH1      | missense  | NM_005963:p.S1667R     |
| 13681 | 17 | 21259353  | 21259353  | G   | T | G | K      | exonic     | KCNJ12    | missense  | NM_001194958:p.V36L    |
| 13681 | 17 | 36559326  | 36559326  | T   | A | T | W      | exonic     | KRTAP4-5  | missense  | NM_033188:p.S74C       |
| 13681 | 17 | 64604500  | 64604500  | T   | A | T | W      | exonic     | ABCA6     | missense  | NM_080284:p.Y1053F     |
| 13681 | 19 | 10463584  | 10463584  | C   | A | C | M      | exonic     | KEAP1     | missense  | NM_012289:p.G332C      |
| 13681 | 19 | 21947991  | 21947991  | T   | C | T | Y      | exonic     | ZNF208    | missense  | NM_007153:p.Y562C      |
| 13681 | 19 | 41419571  | 41419571  | G   | T | G | K      | exonic     | ZNF146    | missense  | NM_001099638:p.C130F   |
| 13681 | 19 | 46222071  | 46222071  | A   | T | A | W      | intergenic | NA        | NA        | NA                     |
| 13681 | 19 | 60055510  | 60055510  | T   | A | T | W      | exonic     | KIR3DL2   | missense  | NM_006737:p.W106R      |
| 13681 | 19 | 62357638  | 62357638  | G   | C | G | S      | exonic     | DUXA      | missense  | NM_001012729:p.T190S   |
| 13681 | 21 | 46641788  | 46641788  | G   | T | G | K      | exonic     | PCNT      | missense  | NM_006031:p.Q1466H     |
| 13681 | 22 | 22890510  | 22890510  | A   | T | A | W      | exonic     | CABIN1    | missense  | NM_001201429:p.Q1580L  |
| 13681 | X  | 5821101   | 5821101   | C   | G | C | S      | exonic     | NLGN4X    | missense  | NM_020742:p.Q736H      |
| 13681 | X  | 26067991  | 26067991  | A   | T | A | W      | exonic     | MAGEB18   | missense  | NM_173699:p.H323L      |
| 13681 | X  | 47315314  | 47315314  | T   | G | T | K      | exonic     | ARAF      | missense  | NM_001654:p.C549G      |
| 13681 | X  | 54794338  | 54794338  | G   | C | G | S      | exonic     | ITIH5L    | missense  | NM_198510:p.P1185A     |
| 13681 | X  | 54801382  | 54801382  | C   | T | C | Y      | exonic     | ITIH5L    | missense  | NM_198510:p.S617N      |
| 13681 | X  | 65169233  | 65169233  | G   | T | G | K      | exonic     | VSIG4     | missense  | NM_001184830:p.Q166K   |
| 13681 | X  | 71812673  | 71812673  | A   | - | C | */-A   | exonic     | PKKA1     | nonsense  | NM_001172436:p.L197K   |
| 13681 | X  | 73878777  | 73878777  | C   | A | C | M      | exonic     | KIAA2022  | missense  | NM_001008537:p.K780N   |
| 13681 | X  | 74921539  | 74921539  | C   | A | C | M      | exonic     | MAGEE2    | nonsense  | NM_138703:p.E25X       |
| 13681 | X  | 100982720 | 100982720 | C   | A | C | M      | exonic     | NXF5      | missense  | NM_032946:p.R135L      |
| 13681 | X  | 117698648 | 117698648 | T   | C | T | Y      | exonic     | DOCK11    | missense  | NM_144658:p.I1879T     |
| 13681 | X  | 123857689 | 123857689 | C   | A | C | M      | exonic     | ODZ1      | missense  | NM_001163279:p.Q100H   |
| 13681 | X  | 125126711 | 125126711 | C   | A | C | M      | exonic     | DCAF12L2  | missense  | NM_001013628:p.S293I   |
| 13681 | X  | 142545963 | 142545963 | -   | T | G | */+T   | exonic     | SLITRK4   | FS_ins    | NM_001184750:p.L210fs  |
| 13681 | X  | 149390076 | 149390076 | G   | T | G | K      | exonic     | MAMLD1    | missense  | NM_005491:p.G525W      |
| 13681 | X  | 149663568 | 149663568 | -   | T | G | */+T   | exonic     | MTMR1     | FS_ins    | NM_003828:p.W509fs     |
| 13681 | X  | 149663569 | 149663569 | C   | A | C | M      | exonic     | MTMR1     | missense  | NM_003828:p.Q510K      |
| 13681 | X  | 153534785 | 153534785 | C   | G | C | S      | exonic     | CTAG2     | missense  | NM_020994:p.G67R       |
| 13681 | X  | 153597761 | 153597761 | C   | A | C | M      | exonic     | GAB3      | missense  | NM_080612:p.R37L       |
| 15145 | 1  | 8606966   | 8606966   | T   | A | T | W      | exonic     | RERE      | missense  | NM_001042681:p.D129V   |
| 15145 | 1  | 39157299  | 39157299  | G   | A | G | R      | exonic     | RHBDL2    | missense  | NM_017821:p.S58F       |
| 15145 | 1  | 57253525  | 57253525  | G   | A | G | R      | exonic     | DAB1      | missense  | NM_021080:p.P355S      |
| 15145 | 1  | 150861975 | 150861975 | C   | A | C | M      | exonic     | LCE3A     | missense  | NM_178431:p.G77W       |
| 15145 | 1  | 152299638 | 152299638 | A   | T | A | W      | splicing   | NUP210L   | NA        | NA                     |
| 15145 | 1  | 170019946 | 170019946 | G   | T | G | K      | exonic     | METTL13   | missense  | NM_014955:p.Q113H      |
| 15145 | 1  | 210260162 | 210260162 | T   | C | T | Y      | exonic     | INTS7     | missense  | NM_015434:p.N99S       |
| 15145 | 1  | 245902505 | 245902505 | C   | A | C | M      | exonic     | OR13G1    | missense  | NM_001005487:p.W154C   |
| 15145 | 2  | 3629888   | 3629888   | C   | A | C | M      | exonic     | COLEC11   | missense  | NM_024027:p.A28D       |
| 15145 | 2  | 44282483  | 44282483  | G   | T | G | K      | exonic     | PPM1B     | missense  | NM_001033557:p.G214V   |
| 15145 | 2  | 140771876 | 140771876 | G   | T | G | K      | exonic     | LRP1B     | missense  | NM_018557:p.P4313Q     |
| 15145 | 2  | 185511334 | 185511334 | C   | A | C | M      | exonic     | ZNF804A   | missense  | NM_194250:p.T989N      |
| 15145 | 2  | 227585149 | 227585149 | C   | A | C | M      | exonic     | COL4A4    | missense  | NM_000092:p.G1442V     |
| 15145 | 2  | 234523434 | 234523434 | C   | A | C | M      | exonic     | TRPM8     | missense  | NM_024080:p.L349M      |
| 15145 | 3  | 39144894  | 39144894  | C   | T | C | Y      | exonic     | TTC21A    | missense  | NM_145755:p.H538Y      |
| 15145 | 3  | 71828354  | 71828354  | C   | A | C | M      | exonic     | E1F4E3    | nonsense  | NM_001134651:p.E118X   |
| 15145 | 3  | 88288137  | 88288137  | G   | T | G | K      | exonic     | C3orf38   | missense  | NM_173824:p.D218Y      |
| 15145 | 3  | 89563128  | 89563128  | G   | T | G | K      | exonic     | EPHA3     | missense  | NM_005233:p.V759L      |
| 15145 | 3  | 113187806 | 113187806 | A   | T | A | W      | exonic     | ABHD10    | missense  | NM_018394:p.D111V      |
| 15145 | 4  | 171762704 | 171762704 | G   | T | G | K      | ncRNA      | HSP90AA6P | NA        | NA                     |
| 15145 | 5  | 42836979  | 42836979  | T   | C | T | Y      | exonic     | SEPP1     | missense  | NM_001085486:p.H249R   |
| 15145 | 5  | 50719122  | 50719122  | G   | C | G | S      | exonic     | ISL1      | missense  | NM_002202:p.S87T       |
| 15145 | 5  | 162850001 | 162850001 | G   | T | G | K      | exonic     | HMMR      | missense  | NM_001142557:p.A577S   |
| 15145 | 6  | 12269852  | 12269852  | A   | T | A | W      | exonic     | HIVEP1    | missense  | NM_002114:p.T2228S     |
| 15145 | 6  | 35890518  | 35890518  | C   | A | C | M      | exonic     | LHFPL5    | missense  | NM_182548:p.D210E      |
| 15145 | 6  | 151334791 | 151334791 | G   | C | G | S      | exonic     | MTHFD1L   | missense  | NM_015440:p.V677L      |
| 15145 | 7  | 31344768  | 31344768  | G   | C | G | S      | exonic     | NEUROD6   | missense  | NM_022728:p.P214A      |
| 15145 | 7  | 77627497  | 77627497  | G   | A | G | R      | exonic     | MAGI2     | missense  | NM_012301:p.P876S      |
| 15145 | 8  | 113726543 | 113726543 | G   | T | G | K      | exonic     | CSMD3     | missense  | NM_198123:p.T1094K     |
| 15145 | 9  | 906890    | 906890    | C   | T | C | Y      | exonic     | DMRT1     | missense  | NM_021951:p.P317L      |
| 15145 | 9  | 103356132 | 103356132 | A   | T | A | W      | exonic     | RNF20     | missense  | NM_019592:p.D648V      |
| 15145 | 9  | 129310158 | 129310158 | G   | T | G | K      | intronic   | FAM129B   | NA        | NA                     |
| 15145 | 11 | 65376964  | 65376964  | A   | C | A | M      | exonic     | SNX32     | missense  | NM_152760:p.N373H      |
| 15145 | 12 | 6529236   | 6529236   | G   | A | G | R      | exonic     | IFFO1     | missense  | NM_001039670:p.L340F   |
| 15145 | 13 | 109620952 | 109620952 | G   | T | G | K      | exonic     | COL4A1    | missense  | NM_001845:p.H1229N     |
| 15145 | 13 | 109890146 | 109890146 | G   | T | G | K      | exonic     | COL4A2    | missense  | NM_001846:p.G308C      |
| 15145 | 14 | 23971512  | 23971512  | GAG | - | C | */-GAG | exonic     | KHNYN     | nonFS_del | NM_015299:p.402_403del |
| 15145 | 15 | 76838823  | 76838823  | G   | A | G | R      | exonic     | ADAMTS7   | missense  | NM_014272:p.R1686C     |
| 15145 | 16 | 16116129  | 16116129  | G   | A | G | R      | exonic     | ABCC1     | missense  | NM_004996:p.A1029T     |
| 15145 | 17 | 29507412  | 29507412  | C   | G | C | S      | exonic     | ACCN1     | missense  | NM_001094:p.V85L       |
| 15145 | 17 | 38108432  | 38108432  | G   | C | G | S      | exonic     | EZH1      | missense  | NM_001991:p.F724L      |
| 15145 | 17 | 39444958  | 39444958  | G   | A | G | R      | exonic     | TMEM101   | missense  | NM_032376:p.P213L      |
| 15145 | 17 | 45630824  | 45630824  | G   | A | G | R      | exonic     | COL1A1    | missense  | NM_000088:p.S171L      |
| 15145 | 18 | 33399469  | 33399469  | G   | A | G | R      | exonic     | CELF4     | missense  | NM_020180:p.T45I       |
| 15145 | 19 | 10461447  | 10461447  | G   | A | G | R      | exonic     | KEAP1     | missense  | NM_012289:p.R470C      |

|       |    |           |           |    |   |   |       |            |           |          |                           |
|-------|----|-----------|-----------|----|---|---|-------|------------|-----------|----------|---------------------------|
| 15145 | 19 | 19488004  | 19488004  | T  | G | T | K     | upstream   | NDUFA13   | NA       | NA                        |
| 15145 | 19 | 19651295  | 19651295  | A  | G | A | R     | exonic     | ZNF101    | missense | NM_033204:p.K166R         |
| 15145 | 19 | 62531328  | 62531328  | G  | T | G | K     | exonic     | ZNF543    | missense | NM_213598:p.C229F         |
| 15145 | 21 | 33847474  | 33847474  | C  | T | C | Y     | exonic     | SON       | missense | NM_138927:p.A1356V        |
| 15145 | 22 | 27958281  | 27958281  | G  | A | G | R     | exonic     | EMID1     | missense | NM_133455:p.G238E         |
| 15145 | X  | 49029868  | 49029868  | A  | C | A | M     | exonic     | PPP1R3F   | missense | NM_001184745:p.E245A      |
| 15145 | X  | 65325018  | 65325018  | C  | A | C | M     | exonic     | HEPH      | missense | NM_138737:p.H294N         |
| 15145 | X  | 100798906 | 100798906 | T  | A | T | W     | exonic     | ARMCX2    | missense | NM_177949:p.S109C         |
| 15145 | X  | 109581480 | 109581480 | G  | C | G | S     | exonic     | RGAG1     | missense | NM_020769:p.V327L         |
| 15145 | X  | 152639620 | 152639620 | A  | G | A | R     | splicing   | BCAP31    | missense | NM_001139457:p.W99R       |
| 15145 | X  | 152658777 | 152658777 | A  | G | A | R     | exonic     | ABCD1     | missense | NM_000033:p.N509S         |
| 15145 | X  | 152932908 | 152932908 | C  | T | C | Y     | exonic     | IRAK1     | missense | NM_001569:p.E440K         |
| 15145 | M  | 15490     | 15490     | A  | G | A | R     | intergenic | NA        | NA       | NA                        |
| 15822 | 2  | 172358391 | 172358391 | G  | C | G | S     | exonic     | SLC25A12  | missense | NM_003705:p.L480V         |
| 15822 | 3  | 149942327 | 149942327 | G  | A | G | R     | exonic     | AGTR1     | missense | NM_009585:p.R272H         |
| 15822 | 15 | 39600027  | 39600027  | G  | C | G | S     | exonic     | RPAP1     | missense | NM_015540:p.H1217D        |
| 15822 | 17 | 7520046   | 7520047   | CA | - | T | */-CA | exonic     | TP53      | FS_del   | NM_001126113:p.122_122del |
| 15822 | 17 | 7623316   | 7623316   | A  | C | A | M     | exonic     | DNAH2     | missense | NM_020877:p.N1858H        |
| 15858 | 1  | 151044334 | 151044334 | C  | A | C | M     | exonic     | LCE1C     | missense | NM_178351:p.R82L          |
| 15858 | 1  | 160234717 | 160234717 | T  | G | T | K     | exonic     | OLFML2B   | missense | NM_015441:p.E332D         |
| 15858 | 1  | 202670334 | 202670334 | C  | A | C | M     | exonic     | PIK3C2B   | missense | NM_002646:p.C1181F        |
| 15858 | 2  | 71724639  | 71724639  | G  | T | G | K     | exonic     | DYSF      | missense | NM_001130987:p.A1522S     |
| 15858 | 2  | 144242059 | 144242059 | T  | A | T | W     | exonic     | ARHGAP15  | missense | NM_018460:p.S426T         |
| 15858 | 3  | 99370847  | 99370847  | C  | A | C | M     | exonic     | OR5H15    | nonsense | NM_001005515:p.S205X      |
| 15858 | 3  | 114996688 | 114996688 | G  | T | G | K     | exonic     | ATP6V1A   | missense | NM_001690:p.R391S         |
| 15858 | 3  | 115552570 | 115552570 | C  | G | C | S     | exonic     | ZBTB20    | missense | NM_001164346:p.E276Q      |
| 15858 | 3  | 141764424 | 141764424 | G  | T | G | K     | exonic     | CLSTN2    | missense | NM_022131:p.R765L         |
| 15858 | 3  | 156338584 | 156338584 | G  | T | G | K     | splicing   | MME       | NA       | NA                        |
| 15858 | 3  | 187820392 | 187820392 | T  | A | T | W     | exonic     | AHSG      | missense | NM_001622:p.V243D         |
| 15858 | 6  | 29502694  | 29502694  | C  | A | C | M     | exonic     | OR11A1    | missense | NM_013937:p.R235M         |
| 15858 | 7  | 47861096  | 47861096  | C  | A | C | M     | exonic     | PKD1L1    | nonsense | NM_138295:p.E1590X        |
| 15858 | 7  | 64076200  | 64076200  | C  | A | C | M     | exonic     | ZNF117    | missense | NM_015852:p.G395V         |
| 15858 | 7  | 73607760  | 73607760  | G  | T | G | K     | splicing   | GTF2IRD1  | nonsense | NM_001199207:p.E707X      |
| 15858 | 7  | 88261718  | 88261718  | C  | A | C | M     | exonic     | C7orf62   | missense | NM_152706:p.D159Y         |
| 15858 | 7  | 91469115  | 91469115  | A  | G | A | R     | exonic     | AKAP9     | missense | NM_005751:p.I650V         |
| 15858 | 7  | 106332952 | 106332952 | A  | G | A | R     | exonic     | PIK3CG    | missense | NM_002649:p.K1065E        |
| 15858 | 8  | 87629779  | 87629779  | G  | A | G | R     | splicing   | CPNE3     | NA       | NA                        |
| 15858 | 8  | 145555074 | 145555074 | G  | C | G | S     | exonic     | GPR172A   | missense | NM_024531:p.G340R         |
| 15858 | 10 | 17020982  | 17020982  | A  | T | A | W     | exonic     | CUBN      | missense | NM_001081:p.Y1907N        |
| 15858 | 10 | 18868283  | 18868283  | C  | A | C | M     | exonic     | CACNB2    | missense | NM_000724:p.A481D         |
| 15858 | 11 | 490634    | 490634    | G  | A | G | R     | exonic     | RNH1      | missense | NM_203384:p.T41M          |
| 15858 | 11 | 55503896  | 55503896  | G  | A | G | R     | ncRNA      | OR7E5P    | NA       | NA                        |
| 15858 | 11 | 55503897  | 55503897  | G  | T | G | K     | ncRNA      | OR7E5P    | NA       | NA                        |
| 15858 | 12 | 37333973  | 37333973  | T  | G | T | K     | exonic     | CPNE8     | missense | NM_153634:p.H558P         |
| 15858 | 12 | 48635477  | 48635477  | C  | A | C | M     | exonic     | AQP2      | missense | NM_000486:p.A212D         |
| 15858 | 12 | 106553265 | 106553265 | C  | G | C | S     | exonic     | BTBD11    | missense | NM_001017523:p.T439R      |
| 15858 | 12 | 123523486 | 123523486 | C  | T | C | Y     | exonic     | NCOR2     | missense | NM_001077261:p.V186I      |
| 15858 | 14 | 75702821  | 75702821  | A  | T | A | W     | exonic     | C14orf118 | missense | NM_017972:p.Q242L         |
| 15858 | 14 | 95002088  | 95002088  | G  | T | G | K     | exonic     | C14orf49  | missense | NM_152592:p.P187H         |
| 15858 | 15 | 38834087  | 38834087  | C  | A | C | M     | splicing   | FAM82A2   | missense | NM_018145:p.V63L          |
| 15858 | 16 | 46823319  | 46823319  | C  | A | C | M     | exonic     | ABCC11    | missense | NM_032583:p.R55           |
| 15858 | 17 | 20433741  | 20433741  | C  | A | C | M     | intergenic | NA        | NA       | NA                        |
| 15858 | 17 | 55114423  | 55114423  | A  | T | A | W     | exonic     | CLTC      | missense | NM_004859:p.E1151V        |
| 15858 | 19 | 2684122   | 2684122   | T  | A | T | W     | exonic     | SLC39A3   | missense | NM_144564:p.Q191L         |
| 15858 | 19 | 15886607  | 15886607  | T  | C | T | Y     | exonic     | CYP4F11   | missense | NM_021187:p.D405G         |
| 15858 | 19 | 35626600  | 35626600  | C  | A | C | M     | exonic     | ZNF536    | missense | NM_014717:p.N97K          |
| 15858 | 19 | 47954057  | 47954057  | C  | T | C | Y     | exonic     | PSG8      | missense | NM_001130167:p.E216K      |
| 15858 | 20 | 51305578  | 51305578  | C  | A | C | M     | exonic     | TSHZ2     | missense | NM_173485:p.T725K         |
| 15858 | 20 | 55621595  | 55621595  | C  | A | C | M     | exonic     | ZBP1      | missense | NM_001160419:p.D234Y      |
| 15858 | 22 | 23353459  | 23353459  | G  | A | G | R     | exonic     | GGT1      | missense | NM_001032365:p.D361N      |
| 15858 | X  | 135560223 | 135560223 | G  | T | G | K     | splicing   | CD40LG    | NA       | NA                        |
| 16246 | 1  | 11172359  | 11172359  | T  | A | T | W     | exonic     | ANGPTL7   | missense | NM_021146:p.C46S          |
| 16246 | 1  | 20121760  | 20121760  | T  | C | T | Y     | exonic     | PLA2G2E   | missense | NM_014589:p.Y39C          |
| 16246 | 1  | 20313338  | 20313338  | A  | T | A | W     | splicing   | PLA2G2D   | silent   | NM_012400:p.S98S          |
| 16246 | 1  | 40008527  | 40008527  | T  | A | T | W     | exonic     | OXCT2     | missense | NM_022120:p.I330F         |
| 16246 | 1  | 62476560  | 62476560  | G  | T | G | K     | exonic     | KANK4     | missense | NM_181712:p.Q989K         |
| 16246 | 1  | 74811706  | 74811706  | G  | A | G | R     | exonic     | C1orf173  | missense | NM_001002912:p.S759F      |
| 16246 | 1  | 85185304  | 85185304  | T  | C | T | Y     | splicing   | MCOLN2    | missense | NM_153259:p.T283A         |
| 16246 | 1  | 86364471  | 86364471  | G  | T | G | K     | exonic     | COL24A1   | missense | NM_152890:p.H46N          |
| 16246 | 1  | 114325516 | 114325516 | G  | T | G | K     | exonic     | OLFML3    | missense | NM_020190:p.D275Y         |
| 16246 | 1  | 145847184 | 145847184 | C  | A | C | M     | exonic     | GJA8      | missense | NM_005267:p.L160I         |
| 16246 | 1  | 150325925 | 150325925 | G  | C | G | S     | exonic     | TCHHL1    | missense | NM_001008536:p.S286C      |
| 16246 | 1  | 150457950 | 150457950 | C  | A | C | M     | exonic     | HRNR      | missense | NM_001009931:p.G927C      |
| 16246 | 1  | 150553519 | 150553519 | G  | T | G | K     | exonic     | FLG       | missense | NM_002016:p.S156Y         |
| 16246 | 1  | 151123600 | 151123600 | C  | G | C | S     | exonic     | SMCP      | missense | NM_030663:p.C26W          |
| 16246 | 1  | 152380601 | 152380601 | C  | A | C | M     | exonic     | NUP210L   | missense | NM_207308:p.G166W         |
| 16246 | 1  | 153185812 | 153185812 | T  | G | T | K     | exonic     | PBXIP1    | missense | NM_020524:p.E321A         |
| 16246 | 1  | 153530982 | 153530982 | C  | G | C | S     | exonic     | PKLR      | missense | NM_000298:p.V294L         |
| 16246 | 1  | 156566035 | 156566035 | C  | A | C | M     | exonic     | CD1B      | missense | NM_001764:p.G212V         |

|       |   |           |           |   |   |   |   |            |          |          |                       |
|-------|---|-----------|-----------|---|---|---|---|------------|----------|----------|-----------------------|
| 16246 | 1 | 156873075 | 156873075 | C | A | C | M | exonic     | SPTA1    | missense | NM_003126;p.A17645    |
| 16246 | 1 | 157002408 | 157002408 | G | A | G | R | exonic     | OR6N1    | missense | NM_001005185;p.S230L  |
| 16246 | 1 | 157002409 | 157002409 | A | T | A | W | exonic     | OR6N1    | missense | NM_001005185;p.S230T  |
| 16246 | 1 | 158155223 | 158155223 | C | A | C | M | exonic     | TAGLN2   | missense | NM_003564;p.Q197H     |
| 16246 | 1 | 161012090 | 161012090 | G | T | G | K | exonic     | DDR2     | missense | NM_001014796;p.K627N  |
| 16246 | 1 | 161383898 | 161383898 | G | T | G | K | exonic     | RG55     | missense | NM_001195303;p.T27N   |
| 16246 | 1 | 164306292 | 164306292 | A | T | A | W | exonic     | FAM78B   | missense | NM_001017961;p.V199E  |
| 16246 | 1 | 178432477 | 178432477 | G | C | G | S | exonic     | QSOX1    | missense | NM_002826;p.L642F     |
| 16246 | 1 | 210865913 | 210865913 | C | G | C | S | exonic     | FAM71A   | missense | NM_153606;p.S357R     |
| 16246 | 1 | 213858926 | 213858926 | G | C | G | S | exonic     | KCTD3    | missense | NM_016121;p.R546S     |
| 16246 | 1 | 216022203 | 216022203 | G | T | G | K | exonic     | SPATA17  | missense | NM_138796;p.R263L     |
| 16246 | 1 | 220810522 | 220810522 | G | A | G | R | exonic     | TAF1A    | missense | NM_005681;p.P238L     |
| 16246 | 1 | 238138096 | 238138096 | A | T | A | W | exonic     | CHRM3    | missense | NM_000740;p.Y241F     |
| 16246 | 1 | 244088556 | 244088556 | C | A | C | M | exonic     | SMYD3    | missense | NM_001167740;p.S314I  |
| 16246 | 1 | 246125629 | 246125629 | G | T | G | K | exonic     | OR2W3    | missense | NM_001001957;p.V40L   |
| 16246 | 1 | 246469379 | 246469379 | C | T | C | Y | exonic     | OR2M4    | missense | NM_017504;p.H176Y     |
| 16246 | 2 | 24114239  | 24114239  | G | A | G | R | exonic     | C2orf44  | nonsense | NM_001142319;p.Q544X  |
| 16246 | 2 | 37121791  | 37121791  | G | T | G | K | exonic     | HEATR5B  | missense | NM_019024;p.P949T     |
| 16246 | 2 | 39850549  | 39850549  | C | A | C | M | exonic     | THUMP2   | missense | NM_025264;p.R159S     |
| 16246 | 2 | 74444045  | 74444045  | C | A | C | M | exonic     | DCTN1    | missense | NM_001135040;p.A1052S |
| 16246 | 2 | 74609564  | 74609564  | G | A | G | R | exonic     | AUP1     | missense | NM_181575;p.L116F     |
| 16246 | 2 | 101277905 | 101277905 | T | C | T | Y | exonic     | RNF149   | missense | NM_173647;p.M211V     |
| 16246 | 2 | 170950990 | 170950990 | G | A | G | R | exonic     | MYO3B    | missense | NM_138995;p.A446T     |
| 16246 | 2 | 182107292 | 182107292 | G | A | G | R | exonic     | ITGA4    | missense | NM_000885;p.E945K     |
| 16246 | 2 | 234191412 | 234191412 | C | A | C | M | exonic     | UGT1A8   | missense | NM_019076;p.S107Y     |
| 16246 | 3 | 1418203   | 1418203   | A | T | A | W | exonic     | CNTN6    | missense | NM_014461;p.N931Y     |
| 16246 | 3 | 12831847  | 12831847  | G | T | G | K | exonic     | CAND2    | missense | NM_001162499;p.R405L  |
| 16246 | 3 | 75488961  | 75488961  | C | G | C | S | intergenic | NA       | NA       | NA                    |
| 16246 | 3 | 106953126 | 106953126 | C | A | C | M | exonic     | CBLB     | missense | NM_170662;p.R198I     |
| 16246 | 3 | 122823258 | 122823258 | G | T | G | K | exonic     | FBXO40   | nonsense | NM_016298;p.E98X      |
| 16246 | 3 | 124995298 | 124995298 | C | A | C | M | exonic     | MYLK     | missense | NM_053028;p.M27I      |
| 16246 | 3 | 125860013 | 125860013 | C | T | C | Y | exonic     | KALRN    | missense | NM_007064;p.R330C     |
| 16246 | 3 | 168560351 | 168560351 | C | G | C | S | splicing   | ZBBX     | NA       | NA                    |
| 16246 | 3 | 168667651 | 168667651 | G | A | G | R | exonic     | SERPINI2 | nonsense | NM_006217;p.Q122X     |
| 16246 | 3 | 187817687 | 187817687 | C | A | C | M | exonic     | AHSG     | missense | NM_001622;p.R143S     |
| 16246 | 3 | 187878205 | 187878205 | C | T | C | Y | exonic     | HRG      | missense | NM_000412;p.P473S     |
| 16246 | 4 | 46625135  | 46625135  | G | T | G | K | exonic     | GABRA4   | missense | NM_000809;p.P510H     |
| 16246 | 4 | 104730364 | 104730364 | C | A | C | M | exonic     | TACR3    | missense | NM_001059;p.R441L     |
| 16246 | 4 | 119957907 | 119957907 | C | A | C | M | exonic     | SEC24D   | missense | NM_014822;p.Q119H     |
| 16246 | 4 | 123570238 | 123570238 | C | A | C | M | exonic     | ADAD1    | missense | NM_001159295;p.S524Y  |
| 16246 | 4 | 143455326 | 143455326 | G | T | G | K | exonic     | INPP4B   | missense | NM_001101669;p.P138T  |
| 16246 | 4 | 155726563 | 155726563 | C | A | C | M | exonic     | FGA      | missense | NM_000508;p.D490Y     |
| 16246 | 4 | 156970464 | 156970464 | C | G | C | S | exonic     | ACCN5    | missense | NM_017419;p.E504D     |
| 16246 | 4 | 177308239 | 177308239 | G | T | G | K | exonic     | WDR17    | missense | NM_181265;p.R700I     |
| 16246 | 5 | 21787987  | 21787987  | C | A | C | M | exonic     | CDH12    | missense | NM_004061;p.E667D     |
| 16246 | 5 | 31352193  | 31352193  | G | T | G | K | splicing   | CDH6     | missense | NM_004932;p.Q504H     |
| 16246 | 5 | 33719744  | 33719744  | A | T | A | W | exonic     | ADAMTS12 | missense | NM_030955;p.Y270N     |
| 16246 | 5 | 71526425  | 71526425  | A | G | A | R | exonic     | MAP1B    | missense | NM_005909;p.Y496C     |
| 16246 | 5 | 82852097  | 82852097  | C | A | C | M | exonic     | VCAN     | missense | NM_001164098;p.S739Y  |
| 16246 | 5 | 110740487 | 110740487 | A | T | A | W | exonic     | CAMK4    | missense | NM_001744;p.T112S     |
| 16246 | 5 | 114888617 | 114888617 | T | A | T | W | exonic     | FEM1C    | missense | NM_020177;p.S381C     |
| 16246 | 5 | 133899453 | 133899453 | G | T | G | K | exonic     | PHF15    | nonsense | NM_015288;p.E3X       |
| 16246 | 5 | 140217336 | 140217336 | G | T | G | K | exonic     | PCDHA10  | missense | NM_018901;p.V507L     |
| 16246 | 5 | 140328836 | 140328836 | G | T | G | K | exonic     | PCDHAC2  | missense | NM_018899;p.R767S     |
| 16246 | 5 | 140553280 | 140553280 | G | A | G | R | exonic     | PCDHB10  | missense | NM_018930;p.G324D     |
| 16246 | 5 | 156522864 | 156522864 | C | A | C | M | exonic     | FAM71B   | missense | NM_130899;p.M330I     |
| 16246 | 5 | 180271123 | 180271123 | G | T | G | K | exonic     | BTNL8    | missense | NM_001040462;p.E192D  |
| 16246 | 6 | 29664097  | 29664097  | A | G | A | R | exonic     | OR2H2    | missense | NM_007160;p.I133V     |
| 16246 | 6 | 30660032  | 30660032  | G | T | G | K | exonic     | ABCF1    | missense | NM_001090;p.R358L     |
| 16246 | 6 | 36149470  | 36149470  | C | G | C | S | exonic     | MAPK14   | missense | NM_139012;p.H148D     |
| 16246 | 6 | 36760026  | 36760026  | C | G | C | S | exonic     | CDKN1A   | missense | NM_000389;p.T57R      |
| 16246 | 6 | 49773613  | 49773613  | G | T | G | K | exonic     | CRISP2   | missense | NM_001142435;p.T145N  |
| 16246 | 6 | 54912618  | 54912618  | G | T | G | K | exonic     | FAM83B   | missense | NM_001010872;p.G297V  |
| 16246 | 6 | 55331760  | 55331760  | G | T | G | K | exonic     | GFRAL    | missense | NM_207410;p.D273Y     |
| 16246 | 6 | 130577347 | 130577347 | C | T | C | Y | exonic     | SAMD3    | missense | NM_152552;p.A33T      |
| 16246 | 7 | 5063451   | 5063451   | G | T | G | K | splicing   | RBAK     | NA       | NA                    |
| 16246 | 7 | 43485806  | 43485806  | C | A | C | M | exonic     | HECW1    | missense | NM_015052;p.L1058I    |
| 16246 | 7 | 47839212  | 47839212  | C | A | C | M | splicing   | PKD1L1   | NA       | NA                    |
| 16246 | 7 | 57192531  | 57192531  | C | G | C | S | exonic     | ZNF479   | missense | NM_033273;p.R178T     |
| 16246 | 7 | 81177454  | 81177454  | C | G | C | S | exonic     | HGF      | missense | NM_000601;p.V496L     |
| 16246 | 7 | 81474930  | 81474930  | C | A | C | M | splicing   | CACNA2D1 | NA       | NA                    |
| 16246 | 7 | 92663108  | 92663108  | A | G | A | R | exonic     | HEPACAM2 | missense | NM_198151;p.V403A     |
| 16246 | 7 | 128274184 | 128274184 | G | T | G | K | exonic     | FLNC     | missense | NM_001127487;p.R1426L |
| 16246 | 8 | 22221497  | 22221497  | G | T | G | K | exonic     | PIWIL2   | missense | NM_018068;p.R551L     |
| 16246 | 8 | 41649300  | 41649300  | C | A | C | M | exonic     | ANK1     | nonsense | NM_000037;p.E1609X    |
| 16246 | 8 | 41909236  | 41909236  | C | A | C | M | exonic     | MYST3    | missense | NM_001099412;p.G1887C |
| 16246 | 8 | 87752334  | 87752334  | C | G | C | S | exonic     | CNGB3    | missense | NM_019098;p.K149N     |
| 16246 | 8 | 139279007 | 139279007 | G | C | G | S | exonic     | FAM135B  | missense | NM_015912;p.R253G     |
| 16246 | 8 | 139279008 | 139279008 | G | T | G | K | exonic     | FAM135B  | nonsense | NM_015912;p.Y252X     |

|       |    |           |           |   |   |   |      |            |          |          |                       |
|-------|----|-----------|-----------|---|---|---|------|------------|----------|----------|-----------------------|
| 16246 | 9  | 17399373  | 17399373  | G | T | G | K    | exonic     | CNTLN    | nonsense | NM_017738:p.G900X     |
| 16246 | 9  | 17447637  | 17447637  | C | T | C | Y    | exonic     | CNTLN    | missense | NM_017738:p.P1077L    |
| 16246 | 9  | 34333373  | 34333373  | C | T | C | Y    | exonic     | NUDT2    | nonsense | NM_147173:p.Q127X     |
| 16246 | 9  | 35652529  | 35652529  | G | A | G | R    | exonic     | C9orf100 | missense | NM_032818:p.P295S     |
| 16246 | 9  | 70818178  | 70818178  | G | C | G | S    | exonic     | PRKACG   | missense | NM_002732:p.N217K     |
| 16246 | 9  | 105925235 | 105925235 | G | A | G | R    | exonic     | SMC2     | missense | NM_001042550:p.E720K  |
| 16246 | 9  | 111745274 | 111745274 | G | T | G | K    | exonic     | PALM2    | missense | NM_001037293:p.K296N  |
| 16246 | 9  | 120970102 | 120970102 | A | T | A | W    | exonic     | DBC1     | missense | NM_014618:p.L456Q     |
| 16246 | 9  | 124185702 | 124185702 | G | T | G | K    | exonic     | PTGS1    | missense | NM_080591:p.V286L     |
| 16246 | 9  | 137785615 | 137785615 | C | T | C | Y    | exonic     | KCNT1    | missense | NM_020822:p.P149L     |
| 16246 | 10 | 21169757  | 21169757  | C | A | C | M    | exonic     | NEBL     | nonsense | NM_006393:p.E419X     |
| 16246 | 10 | 28269742  | 28269742  | T | A | T | W    | splicing   | ARMC4    | NA       | NA                    |
| 16246 | 10 | 28313121  | 28313121  | G | A | G | R    | exonic     | ARMC4    | missense | NM_018076:p.S227L     |
| 16246 | 10 | 37526406  | 37526406  | T | A | T | W    | exonic     | ANKRD30A | nonsense | NM_052997:p.L847X     |
| 16246 | 10 | 50489118  | 50489118  | C | A | C | M    | exonic     | SLC18A3  | nonsense | NM_003055:p.S109X     |
| 16246 | 10 | 55251824  | 55251824  | C | A | C | M    | exonic     | PCDH15   | missense | NM_001142766:p.A1887S |
| 16246 | 10 | 55368593  | 55368593  | C | A | C | M    | exonic     | PCDH15   | missense | NM_001142766:p.V1121F |
| 16246 | 10 | 62322690  | 62322690  | C | A | C | M    | exonic     | RHOBTB1  | missense | NM_014836:p.W122C     |
| 16246 | 10 | 68969392  | 68969392  | G | T | G | K    | exonic     | CTNNA3   | missense | NM_013266:p.P112T     |
| 16246 | 10 | 82321273  | 82321273  | G | T | G | K    | exonic     | SH2D4B   | missense | NM_001145719:p.A103S  |
| 16246 | 10 | 96084464  | 96084464  | A | G | A | R    | splicing   | NOC3L    | missense | NM_022451:p.S731P     |
| 16246 | 10 | 118218695 | 118218695 | C | G | C | S    | exonic     | PNLIPRP3 | missense | NM_001011709:p.C312W  |
| 16246 | 11 | 6870078   | 6870078   | A | C | A | M    | exonic     | OR2D2    | missense | NM_003700:p.I77R      |
| 16246 | 11 | 10741988  | 10741988  | C | T | C | Y    | exonic     | CTR9     | nonsense | NM_014633:p.R394X     |
| 16246 | 11 | 11271235  | 11271235  | C | A | C | M    | exonic     | GALNTL4  | missense | NM_198516:p.V532L     |
| 16246 | 11 | 12182371  | 12182371  | A | G | A | R    | splicing   | MICAL2   | NA       | NA                    |
| 16246 | 11 | 22354755  | 22354755  | G | T | G | K    | exonic     | SLC17A6  | missense | NM_020346:p.M458I     |
| 16246 | 11 | 35410952  | 35410952  | A | T | A | W    | exonic     | PAMR1    | missense | NM_001001991:p.L564Q  |
| 16246 | 11 | 46356600  | 46356600  | G | C | G | S    | exonic     | DGKZ     | missense | NM_001199267:p.A797P  |
| 16246 | 11 | 55175707  | 55175707  | C | A | C | M    | exonic     | OR4S2    | missense | NM_001004059:p.P251H  |
| 16246 | 11 | 55814264  | 55814264  | A | T | A | W    | exonic     | OR8H1    | missense | NM_001005199:p.L284Q  |
| 16246 | 11 | 61915584  | 61915584  | G | T | G | K    | exonic     | ASRGL1   | missense | NM_001083926:p.A209S  |
| 16246 | 11 | 77090162  | 77090162  | T | A | T | W    | exonic     | RSF1     | missense | NM_016578:p.K587M     |
| 16246 | 11 | 88775269  | 88775269  | G | A | G | R    | exonic     | NOX4     | missense | NM_016931:p.P240L     |
| 16246 | 11 | 92535576  | 92535576  | C | A | C | M    | exonic     | SLC36A4  | missense | NM_152313:p.M327I     |
| 16246 | 11 | 123316334 | 123316334 | G | T | G | K    | exonic     | OR4D5    | missense | NM_001001965:p.M267I  |
| 16246 | 11 | 123918082 | 123918082 | T | A | T | W    | exonic     | OR8B12   | missense | NM_001005195:p.N227Y  |
| 16246 | 12 | 14501436  | 14501436  | G | T | G | K    | exonic     | ATF7IP   | nonsense | NM_018179:p.E700X     |
| 16246 | 12 | 21856355  | 21856355  | T | A | T | W    | exonic     | ABCC9    | missense | NM_020298:p.K1333I    |
| 16246 | 12 | 29532011  | 29532011  | - | A | C | */+A | exonic     | OVCH1    | FS_ins   | NM_183378:p.W258fs    |
| 16246 | 12 | 29532012  | 29532012  | C | A | C | M    | exonic     | OVCH1    | missense | NM_183378:p.W258L     |
| 16246 | 12 | 65074318  | 65074318  | C | A | C | M    | exonic     | GRIP1    | missense | NM_021150:p.G637V     |
| 16246 | 12 | 65074319  | 65074319  | C | A | C | M    | exonic     | GRIP1    | nonsense | NM_021150:p.G637X     |
| 16246 | 12 | 68357094  | 68357094  | T | A | T | W    | exonic     | BEST3    | missense | NM_032735:p.T246S     |
| 16246 | 12 | 75265415  | 75265415  | T | C | T | Y    | exonic     | BBS10    | missense | NM_024685:p.K161E     |
| 16246 | 12 | 108714849 | 108714849 | C | G | C | S    | exonic     | TRPV4    | missense | NM_021625:p.M605I     |
| 16246 | 12 | 119076079 | 119076079 | G | T | G | K    | exonic     | GCN1L1   | missense | NM_006836:p.A1240D    |
| 16246 | 13 | 42832012  | 42832012  | C | A | C | M    | exonic     | ENOX1    | missense | NM_017993:p.M188I     |
| 16246 | 13 | 47839630  | 47839630  | G | T | G | K    | splicing   | RB1      | NA       | NA                    |
| 16246 | 13 | 52317664  | 52317664  | G | C | G | S    | exonic     | PCDH8    | missense | NM_032949:p.F815L     |
| 16246 | 13 | 53913438  | 53913438  | T | A | T | W    | intergenic | NA       | NA       | NA                    |
| 16246 | 13 | 57196798  | 57196798  | C | A | C | M    | exonic     | PCDH17   | missense | NM_001040429:p.S950Y  |
| 16246 | 13 | 76678855  | 76678855  | C | A | C | M    | exonic     | MYCBP2   | nonsense | NM_015057:p.E1175X    |
| 16246 | 13 | 111770173 | 111770173 | G | C | G | S    | exonic     | SOX1     | missense | NM_005986:p.R67P      |
| 16246 | 13 | 113336326 | 113336326 | G | T | G | K    | exonic     | TFDP1    | missense | NM_007111:p.A199S     |
| 16246 | 14 | 19459043  | 19459043  | G | C | G | S    | exonic     | OR4K5    | missense | NM_001005483:p.M146I  |
| 16246 | 14 | 19552605  | 19552605  | C | A | C | M    | exonic     | OR4K14   | missense | NM_001004712:p.L196F  |
| 16246 | 14 | 19827727  | 19827727  | C | A | C | M    | exonic     | TTC5     | missense | NM_138376:p.V408F     |
| 16246 | 14 | 21172217  | 21172217  | C | G | C | S    | exonic     | OR10G2   | missense | NM_001005466:p.V208L  |
| 16246 | 14 | 21203244  | 21203244  | G | T | G | K    | exonic     | OR4E2    | missense | NM_001001912:p.M36I   |
| 16246 | 14 | 62958477  | 62958477  | C | A | C | M    | exonic     | PPP2R5E  | missense | NM_006246:p.W148L     |
| 16246 | 14 | 63533554  | 63533554  | T | C | T | Y    | exonic     | SYNE2    | missense | NM_182914:p.I1026T    |
| 16246 | 14 | 87470917  | 87470917  | T | C | T | Y    | exonic     | GALC     | missense | NM_001201402:p.N631S  |
| 16246 | 14 | 88053316  | 88053316  | G | A | G | R    | exonic     | PTPN21   | missense | NM_007039:p.R75C      |
| 16246 | 14 | 93149139  | 93149139  | G | T | G | K    | exonic     | KIAA1409 | missense | NM_020818:p.R1156L    |
| 16246 | 14 | 104810121 | 104810121 | G | A | G | R    | exonic     | BRF1     | missense | NM_001519:p.R141C     |
| 16246 | 15 | 19884458  | 19884458  | C | A | C | M    | exonic     | OR4N4    | missense | NM_001005241:p.L208I  |
| 16246 | 15 | 22473165  | 22473165  | C | A | C | M    | exonic     | C15orf2  | missense | NM_018958:p.P353Q     |
| 16246 | 15 | 41608887  | 41608887  | C | T | C | Y    | exonic     | MAP1A    | missense | NM_002373:p.R2642W    |
| 16246 | 15 | 43200125  | 43200125  | G | A | G | R    | exonic     | DUOXA1   | missense | NM_144565:p.R171C     |
| 16246 | 15 | 48337979  | 48337979  | G | T | G | K    | exonic     | HDC      | missense | NM_002112:p.H78N      |
| 16246 | 15 | 50454813  | 50454813  | C | A | C | M    | exonic     | MYOSA    | missense | NM_001142495:p.A853S  |
| 16246 | 15 | 82496738  | 82496738  | G | T | G | K    | exonic     | ADAMTSL3 | missense | NM_207517:p.C1655F    |
| 16246 | 15 | 98620146  | 98620146  | C | A | C | M    | exonic     | ADAMTSL7 | missense | NM_139057:p.Q269H     |
| 16246 | 16 | 5050415   | 5050415   | C | A | C | M    | exonic     | C16orf89 | missense | NM_152459:p.G128W     |
| 16246 | 16 | 17142599  | 17142599  | C | A | C | M    | exonic     | XYLT1    | missense | NM_022166:p.R500L     |
| 16246 | 16 | 32798475  | 32798475  | G | T | G | K    | ncRNA      | SLC6A10P | NA       | NA                    |
| 16246 | 16 | 46778644  | 46778644  | T | C | T | Y    | exonic     | ABCC11   | missense | NM_032583:p.I968V     |
| 16246 | 16 | 63539408  | 63539408  | C | G | C | S    | exonic     | CDH11    | missense | NM_001797:p.D664H     |

|       |    |           |           |   |   |   |      |            |         |          |                      |
|-------|----|-----------|-----------|---|---|---|------|------------|---------|----------|----------------------|
| 16246 | 16 | 69139841  | 69139841  | T | C | T | Y    | exonic     | SF3B3   | missense | NM_012426:p.L466T    |
| 16246 | 16 | 82681999  | 82681999  | T | A | T | W    | exonic     | MBTPS1  | missense | NM_003791:p.N338I    |
| 16246 | 16 | 84370919  | 84370919  | T | A | T | W    | exonic     | COX4NB  | missense | NM_006067:p.S177C    |
| 16246 | 17 | 17059275  | 17059275  | T | G | T | K    | exonic     | FLCN    | missense | NM_144997:p.S461R    |
| 16246 | 17 | 27373487  | 27373487  | G | T | G | K    | exonic     | LRR37B  | missense | NM_052888:p.K403N    |
| 16246 | 17 | 30714797  | 30714797  | C | G | C | S    | exonic     | SLFN11  | missense | NM_001104588:p.R48P  |
| 16246 | 17 | 36977527  | 36977527  | C | A | C | M    | splicing   | KRT9    | nonsense | NM_000226:p.E466X    |
| 16246 | 17 | 52689481  | 52689481  | G | T | G | K    | exonic     | MSI2    | missense | NM_138962:p.S29I     |
| 16246 | 17 | 53588105  | 53588105  | C | A | C | M    | exonic     | OR4D1   | missense | NM_012374:p.L198I    |
| 16246 | 17 | 58191092  | 58191092  | C | A | C | M    | exonic     | 40978   | missense | NM_152598:p.S73I     |
| 16246 | 17 | 58925040  | 58925040  | G | T | G | K    | exonic     | ACE     | missense | NM_000789:p.K1054N   |
| 16246 | 18 | 62362396  | 62362396  | C | A | C | M    | exonic     | CDH19   | missense | NM_021153:p.V336F    |
| 16246 | 19 | 2071963   | 2071963   | G | A | G | R    | exonic     | AP3D1   | missense | NM_003938:p.S460F    |
| 16246 | 19 | 45097772  | 45097772  | G | C | G | S    | exonic     | FCGBP   | missense | NM_003890:p.S1638R   |
| 16246 | 19 | 60739402  | 60739402  | - | A | C | */+A | exonic     | SBK2    | FS_ins   | NM_001101401:p.L24fs |
| 16246 | 19 | 62716231  | 62716231  | G | T | G | K    | intergenic | NA      | NA       | NA                   |
| 16246 | 20 | 13788008  | 13788008  | G | T | G | K    | exonic     | SEL1L2  | missense | NM_025229:p.T573K    |
| 16246 | 20 | 17410614  | 17410614  | G | T | G | K    | exonic     | PCSK2   | missense | NM_002594:p.D606Y    |
| 16246 | 20 | 47563101  | 47563101  | G | T | G | K    | exonic     | PTGIS   | missense | NM_000961:p.L377M    |
| 16246 | 20 | 57032325  | 57032325  | C | G | C | S    | exonic     | TUBB1   | missense | NM_030773:p.L150V    |
| 16246 | 20 | 57199503  | 57199503  | C | A | C | M    | exonic     | ZNF831  | missense | NM_178457:p.P12T     |
| 16246 | 21 | 46376727  | 46376727  | C | A | C | M    | exonic     | COL6A2  | missense | NM_001849:p.R965S    |
| 16246 | 22 | 38546947  | 38546947  | C | T | C | Y    | exonic     | ENTHD1  | missense | NM_152512:p.A277T    |
| 16246 | X  | 22042611  | 22042611  | G | C | G | S    | exonic     | PHEX    | missense | NM_000444:p.D430H    |
| 16246 | X  | 31406308  | 31406308  | A | T | A | W    | exonic     | DMD     | missense | NM_004020:p.W465R    |
| 16246 | X  | 50072283  | 50072283  | C | G | C | S    | exonic     | CCNB3   | missense | NM_033031:p.P1112A   |
| 16246 | X  | 68666254  | 68666254  | G | T | G | K    | exonic     | FAM155B | missense | NM_015686:p.Q383H    |
| 16246 | X  | 78504837  | 78504837  | G | T | G | K    | exonic     | ITM2A   | missense | NM_001171581:p.T106N |
| 16246 | X  | 86773997  | 86773997  | G | T | G | K    | exonic     | KLHL4   | missense | NM_019117:p.G486C    |
| 16246 | X  | 91019650  | 91019650  | G | T | G | K    | exonic     | PCDH11X | missense | NM_032969:p.R585S    |
| 16246 | X  | 91760002  | 91760002  | G | T | G | K    | exonic     | PCDH11X | missense | NM_032969:p.A1141S   |
| 16246 | X  | 107864602 | 107864602 | G | T | G | K    | exonic     | IRS4    | missense | NM_003604:p.N543K    |
| 16246 | X  | 108583482 | 108583482 | C | A | C | M    | exonic     | GUCY2F  | missense | NM_001522:p.R432L    |
| 16246 | X  | 135326312 | 135326312 | C | A | C | M    | exonic     | GPR112  | missense | NM_153834:p.P3080H   |
| 16246 | X  | 139414783 | 139414783 | G | T | G | K    | exonic     | SOX3    | missense | NM_005634:p.H37N     |
| 16246 | X  | 152622612 | 152622612 | T | C | T | Y    | exonic     | BCAP31  | missense | NM_001139457:p.K225R |
| 16246 | M  | 9622      | 9622      | G | C | G | S    | intergenic | NA      | NA       | NA                   |
| 16461 | 1  | 7756105   | 7756105   | G | C | G | S    | exonic     | VAMP3   | missense | NM_004781:p.A7P      |
| 16461 | 1  | 12339107  | 12339107  | G | T | G | K    | exonic     | VPS13D  | nonsense | NM_018156:p.E3288X   |
| 16461 | 1  | 16134669  | 16134669  | C | A | C | M    | exonic     | SPEN    | missense | NM_015001:p.A3116E   |
| 16461 | 1  | 23641615  | 23641615  | C | A | C | M    | exonic     | ASAP3   | missense | NM_001143778:p.R175I |
| 16461 | 1  | 32616203  | 32616203  | C | A | C | M    | exonic     | BSDC1   | missense | NM_018045:p.A211S    |
| 16461 | 1  | 33771372  | 33771372  | C | A | C | M    | exonic     | CSMD2   | missense | NM_052896:p.G3202W   |
| 16461 | 1  | 40549796  | 40549796  | C | - | T | */-C | exonic     | COL9A2  | FS_del   | NM_001852:p.G161fs   |
| 16461 | 1  | 44194878  | 44194878  | T | C | T | Y    | exonic     | IPO13   | missense | NM_014652:p.M341T    |
| 16461 | 1  | 64416573  | 64416573  | G | A | G | R    | exonic     | ROR1    | missense | NM_005012:p.S754N    |
| 16461 | 1  | 65006966  | 65006966  | T | A | T | W    | exonic     | RAVER2  | missense | NM_018211:p.C97S     |
| 16461 | 1  | 65117298  | 65117298  | C | G | C | S    | exonic     | JAK1    | missense | NM_002227:p.M109I    |
| 16461 | 1  | 65803854  | 65803854  | C | A | C | M    | exonic     | LEPR    | missense | NM_001198689:p.F6L   |
| 16461 | 1  | 70277699  | 70277699  | C | A | C | M    | exonic     | LRR37   | missense | NM_020794:p.Q1164K   |
| 16461 | 1  | 78181025  | 78181025  | G | C | G | S    | exonic     | NEXN    | missense | NM_144573:p.E651Q    |
| 16461 | 1  | 84420489  | 84420489  | G | C | G | S    | exonic     | PRKACB  | missense | NM_207578:p.D43H     |
| 16461 | 1  | 89298578  | 89298578  | T | C | T | Y    | exonic     | GBP1    | missense | NM_002053:p.T70A     |
| 16461 | 1  | 99160143  | 99160143  | G | T | G | K    | exonic     | LPPR5   | nonsense | NM_001010861:p.C227X |
| 16461 | 1  | 148187543 | 148187543 | T | A | T | W    | exonic     | OTUD7B  | missense | NM_020205:p.K397M    |
| 16461 | 1  | 149662617 | 149662617 | C | G | C | S    | exonic     | POGZ    | missense | NM_001194938:p.D458H |
| 16461 | 1  | 150903301 | 150903301 | C | G | C | S    | exonic     | LCE2D   | missense | NM_178430:p.C32W     |
| 16461 | 1  | 156418740 | 156418740 | T | A | T | W    | intronic   | CD1D    | NA       | NA                   |
| 16461 | 1  | 156936697 | 156936697 | C | A | C | M    | exonic     | OR6K2   | missense | NM_001005279:p.A124S |
| 16461 | 1  | 167750274 | 167750274 | G | T | G | K    | exonic     | F5      | missense | NM_000130:p.F2192L   |
| 16461 | 1  | 175265395 | 175265395 | C | A | C | M    | exonic     | ASTN1   | missense | NM_207108:p.R373I    |
| 16461 | 1  | 180812038 | 180812038 | T | A | T | W    | exonic     | RNASEL  | missense | NM_021133:p.H672L    |
| 16461 | 1  | 181339370 | 181339370 | G | T | G | K    | exonic     | LAMC1   | missense | NM_002293:p.D235Y    |
| 16461 | 1  | 181763743 | 181763743 | G | T | G | K    | exonic     | SMG7    | nonsense | NM_173156:p.E172X    |
| 16461 | 1  | 194494218 | 194494218 | C | A | C | M    | exonic     | KCNT2   | missense | NM_198503:p.W980C    |
| 16461 | 1  | 195665224 | 195665224 | G | T | G | K    | exonic     | CRB1    | missense | NM_001193640:p.G788V |
| 16461 | 1  | 198851269 | 198851269 | T | C | T | Y    | exonic     | KIF14   | missense | NM_014875:p.I402V    |
| 16461 | 1  | 198853747 | 198853747 | T | A | T | W    | exonic     | KIF14   | missense | NM_014875:p.K243M    |
| 16461 | 1  | 200106381 | 200106381 | A | C | A | M    | exonic     | IPO9    | missense | NM_018085:p.Q727H    |
| 16461 | 1  | 201012799 | 201012799 | G | A | G | R    | exonic     | KDM5B   | missense | NM_006618:p.T84M     |
| 16461 | 1  | 212237508 | 212237508 | A | G | A | R    | exonic     | PROX1   | missense | NM_002763:p.H336R    |
| 16461 | 1  | 214318104 | 214318104 | C | A | C | M    | exonic     | USH2A   | missense | NM_206933:p.G1841V   |
| 16461 | 1  | 228405582 | 228405582 | C | G | C | S    | exonic     | GALNT2  | nonsense | NM_004481:p.Y99X     |
| 16461 | 1  | 233449801 | 233449801 | C | G | C | S    | exonic     | ARID4B  | missense | NM_016374:p.D505H    |
| 16461 | 1  | 234713460 | 234713460 | G | C | G | S    | UTR3       | EDARADD | NA       | NA                   |
| 16461 | 1  | 239098706 | 239098706 | G | T | G | K    | exonic     | RG57    | missense | NM_002924:p.Q174K    |
| 16461 | 1  | 245125766 | 245125766 | T | A | T | W    | exonic     | AHCTF1  | missense | NM_015446:p.T579S    |
| 16461 | 1  | 245902419 | 245902419 | G | A | G | R    | exonic     | OR13G1  | missense | NM_001005487:p.A183V |
| 16461 | 2  | 8921771   | 8921771   | C | A | C | M    | exonic     | MBOAT2  | missense | NM_138799:p.Q344H    |



|       |   |           |           |   |   |   |   |            |          |          |                       |
|-------|---|-----------|-----------|---|---|---|---|------------|----------|----------|-----------------------|
| 16461 | 2 | 9493915   | 9493915   | G | T | G | K | exonic     | CPSF3    | missense | NM_016207:p.R245M     |
| 16461 | 2 | 11251832  | 11251832  | C | A | C | M | splicing   | ROCK2    | NA       | NA                    |
| 16461 | 2 | 31032074  | 31032074  | C | T | C | Y | exonic     | GALNT14  | missense | NM_024572:p.A190T     |
| 16461 | 2 | 39746692  | 39746692  | C | A | C | M | exonic     | TMEM178  | missense | NM_152390:p.A25D      |
| 16461 | 2 | 53889047  | 53889047  | G | C | G | S | exonic     | ERLEC1   | missense | NM_001127397:p.L329F  |
| 16461 | 2 | 71759850  | 71759850  | G | C | G | S | exonic     | DYSF     | missense | NM_001130987:p.E2014Q |
| 16461 | 2 | 86685770  | 86685770  | T | C | T | Y | exonic     | RNF103   | missense | NM_005667:p.I255M     |
| 16461 | 2 | 88206980  | 88206980  | G | C | G | S | exonic     | FABP1    | missense | NM_001443:p.L24V      |
| 16461 | 2 | 95210770  | 95210770  | G | T | G | K | exonic     | ZNF2     | missense | NM_021088:p.R157L     |
| 16461 | 2 | 99990278  | 99990278  | G | T | G | K | exonic     | AFF3     | missense | NM_001025108:p.T109N  |
| 16461 | 2 | 104839461 | 104839461 | T | A | T | W | exonic     | POU3F3   | missense | NM_006236:p.V354E     |
| 16461 | 2 | 116227290 | 116227290 | C | A | C | M | exonic     | DPP10    | missense | NM_001004360:p.Q334K  |
| 16461 | 2 | 127978729 | 127978729 | C | G | C | S | splicing   | IWS1     | NA       | NA                    |
| 16461 | 2 | 140845229 | 140845229 | C | T | C | Y | exonic     | LRP1B    | missense | NM_018557:p.G3622S    |
| 16461 | 2 | 141174422 | 141174422 | C | A | C | M | exonic     | LRP1B    | missense | NM_018557:p.K2222N    |
| 16461 | 2 | 165919106 | 165919106 | G | T | G | K | exonic     | SCN2A    | missense | NM_021007:p.Q1026H    |
| 16461 | 2 | 170523284 | 170523284 | T | A | T | W | splicing   | UBR3     | NA       | NA                    |
| 16461 | 2 | 179323490 | 179323490 | C | A | C | M | exonic     | TTN      | missense | NM_133379:p.C3961F    |
| 16461 | 2 | 190041483 | 190041483 | C | G | C | S | exonic     | WDR75    | missense | NM_032168:p.L556V     |
| 16461 | 2 | 196892456 | 196892456 | T | A | T | W | exonic     | HECW2    | missense | NM_020760:p.E468V     |
| 16461 | 2 | 196895457 | 196895457 | G | T | G | K | exonic     | HECW2    | missense | NM_020760:p.Q292K     |
| 16461 | 2 | 202311651 | 202311651 | C | A | C | M | exonic     | ALS2     | missense | NM_020919:p.A802S     |
| 16461 | 2 | 207340018 | 207340018 | C | G | C | S | exonic     | FASTKD2  | missense | NM_014929:p.S119C     |
| 16461 | 2 | 215526903 | 215526903 | C | T | C | Y | exonic     | ABCA12   | missense | NM_173076:p.M2189I    |
| 16461 | 2 | 220079305 | 220079305 | C | T | C | Y | exonic     | GMPPA    | missense | NM_205847:p.P360L     |
| 16461 | 2 | 230369622 | 230369622 | T | C | T | Y | exonic     | TRIP12   | missense | NM_004238:p.K1174E    |
| 16461 | 3 | 7696961   | 7696961   | T | A | T | W | exonic     | GRM7     | missense | NM_000844:p.C893S     |
| 16461 | 3 | 9388215   | 9388215   | G | A | G | R | exonic     | THUMPD3  | missense | NM_015453:p.V268M     |
| 16461 | 3 | 27734163  | 27734163  | C | A | C | M | exonic     | EOMES    | missense | NM_005442:p.R488L     |
| 16461 | 3 | 43616949  | 43616949  | T | C | T | Y | exonic     | ANO10    | missense | NM_018075:p.K90E      |
| 16461 | 3 | 47274025  | 47274025  | C | T | C | Y | exonic     | KIF9     | missense | NM_022342:p.M337I     |
| 16461 | 3 | 49058972  | 49058972  | C | A | C | M | exonic     | QRICH1   | missense | NM_198880:p.V521L     |
| 16461 | 3 | 49136022  | 49136022  | C | A | C | M | exonic     | LAMB2    | missense | NM_002292:p.D1282Y    |
| 16461 | 3 | 49637551  | 49637551  | G | C | G | S | exonic     | BSN      | missense | NM_003458:p.A122P     |
| 16461 | 3 | 49670477  | 49670477  | C | A | C | M | exonic     | BSN      | missense | NM_003458:p.F2828L    |
| 16461 | 3 | 52521651  | 52521651  | G | A | G | R | splicing   | STAB1    | NA       | NA                    |
| 16461 | 3 | 52527045  | 52527045  | G | T | G | K | exonic     | STAB1    | missense | NM_015136:p.A1583S    |
| 16461 | 3 | 62331016  | 62331016  | G | T | G | K | exonic     | FEZF2    | missense | NM_018008:p.Q388K     |
| 16461 | 3 | 69133464  | 69133464  | T | A | T | W | exonic     | C3orf64  | missense | NM_173654:p.M238L     |
| 16461 | 3 | 77678297  | 77678297  | C | T | C | Y | exonic     | ROBO2    | nonsense | NM_001128929:p.Q332X  |
| 16461 | 3 | 95708376  | 95708376  | T | G | T | K | intergenic | NA       | NA       | NA                    |
| 16461 | 3 | 114996650 | 114996650 | G | T | G | K | exonic     | ATP6V1A  | missense | NM_001690:p.G379C     |
| 16461 | 3 | 120106213 | 120106213 | C | A | C | M | exonic     | IGSF11   | nonsense | NM_152538:p.E275X     |
| 16461 | 3 | 120617611 | 120617611 | C | A | C | M | exonic     | ARHGAP31 | missense | NM_020754:p.T1382K    |
| 16461 | 3 | 121008984 | 121008984 | G | T | G | K | splicing   | NR1I2    | missense | NM_033013:p.R66M      |
| 16461 | 3 | 132776642 | 132776642 | A | C | A | M | exonic     | CPNE4    | missense | NM_130808:p.L297W     |
| 16461 | 3 | 166199044 | 166199044 | G | T | G | K | exonic     | SI       | missense | NM_001041:p.D1506E    |
| 16461 | 3 | 170316012 | 170316012 | C | A | C | M | exonic     | MECOM    | missense | NM_001163999:p.S594I  |
| 16461 | 3 | 182148360 | 182148360 | C | T | C | Y | exonic     | FXR1     | missense | NM_001013438:p.A71V   |
| 16461 | 3 | 185365290 | 185365290 | A | G | A | R | exonic     | DVL3     | missense | NM_004423:p.N159S     |
| 16461 | 3 | 192419303 | 192419303 | C | G | C | S | exonic     | OSTN     | missense | NM_198184:p.T59R      |
| 16461 | 3 | 197871164 | 197871164 | A | T | A | W | exonic     | LRR33    | missense | NM_198565:p.S85C      |
| 16461 | 4 | 1331974   | 1331974   | G | T | G | K | exonic     | KIAA1530 | missense | NM_020894:p.C32F      |
| 16461 | 4 | 1378655   | 1378655   | A | T | A | W | exonic     | CRIPAK   | missense | NM_175918:p.H119L     |
| 16461 | 4 | 47637581  | 47637581  | G | T | G | K | exonic     | CNGA1    | nonsense | NM_001142564:p.S276X  |
| 16461 | 4 | 56457800  | 56457800  | T | G | T | K | exonic     | EXOC1    | missense | NM_018261:p.L705R     |
| 16461 | 4 | 57571330  | 57571330  | G | T | G | K | exonic     | POLR2B   | missense | NM_000938:p.R484L     |
| 16461 | 4 | 68885405  | 68885405  | G | C | G | S | exonic     | YTHDC1   | missense | NM_133370:p.S273C     |
| 16461 | 4 | 85927757  | 85927757  | G | C | G | S | exonic     | WDFY3    | missense | NM_014991:p.T1268R    |
| 16461 | 4 | 89602386  | 89602386  | C | A | C | M | exonic     | HERC5    | missense | NM_016323:p.P182T     |
| 16461 | 4 | 111617255 | 111617255 | C | T | C | Y | exonic     | ENPEP    | missense | NM_001977:p.P79L      |
| 16461 | 4 | 114497796 | 114497796 | G | C | G | S | exonic     | ANK2     | missense | NM_001148:p.G2858A    |
| 16461 | 4 | 126592414 | 126592414 | G | C | G | S | exonic     | FAT4     | missense | NM_024582:p.G3598A    |
| 16461 | 4 | 151373357 | 151373357 | A | C | A | M | exonic     | DCLK2    | missense | NM_001040261:p.N515T  |
| 16461 | 4 | 154011414 | 154011414 | C | G | C | S | exonic     | ARFIP1   | missense | NM_001025595:p.L88V   |
| 16461 | 4 | 166440254 | 166440254 | C | G | C | S | exonic     | KLHL2    | missense | NM_001161522:p.P218R  |
| 16461 | 4 | 177320231 | 177320231 | A | T | A | W | exonic     | WDR17    | missense | NM_181265:p.K921I     |
| 16461 | 5 | 11045745  | 11045745  | G | C | G | S | exonic     | CTNND2   | missense | NM_001332:p.I1043M    |
| 16461 | 5 | 32127020  | 32127020  | G | C | G | S | exonic     | PZDZ2    | missense | NM_178140:p.R2570T    |
| 16461 | 5 | 38524973  | 38524973  | C | G | C | S | exonic     | LIFR     | missense | NM_002310:p.E767Q     |
| 16461 | 5 | 50156547  | 50156547  | G | A | G | R | exonic     | PARP8    | missense | NM_001178056:p.A595T  |
| 16461 | 5 | 52251931  | 52251931  | G | C | G | S | exonic     | ITGA1    | missense | NM_181501:p.R723P     |
| 16461 | 5 | 56210598  | 56210598  | G | T | G | K | exonic     | MAP3K1   | missense | NM_005921:p.C667F     |
| 16461 | 5 | 98221948  | 98221948  | C | A | C | M | exonic     | CHD1     | missense | NM_001270:p.R1541S    |
| 16461 | 5 | 112207331 | 112207331 | G | A | G | R | exonic     | APC      | missense | NM_000038:p.R2714H    |
| 16461 | 5 | 128348808 | 128348808 | G | C | G | S | exonic     | SLC27A6  | missense | NM_014031:p.G189R     |
| 16461 | 5 | 138735759 | 138735759 | G | C | G | S | exonic     | SLC23A1  | nonsense | NM_152685:p.Y548X     |
| 16461 | 5 | 140495585 | 140495585 | C | A | C | M | exonic     | PCDH5    | missense | NM_015669:p.H129N     |
| 16461 | 5 | 140543660 | 140543660 | G | C | G | S | exonic     | PCDH16   | missense | NM_020957:p.A448P     |

|       |    |           |           |   |      |   |        |            |           |          |                      |
|-------|----|-----------|-----------|---|------|---|--------|------------|-----------|----------|----------------------|
| 16461 | 5  | 140554588 | 140554588 | G | T    | G | K      | exonic     | PCDHB10   | missense | NM_018930:p.G760V    |
| 16461 | 5  | 140568759 | 140568759 | C | A    | C | M      | exonic     | PCDHB12   | missense | NM_018932:p.N32K     |
| 16461 | 5  | 140700677 | 140700677 | C | A    | C | M      | exonic     | PCDHGA2   | missense | NM_018915:p.P652H    |
| 16461 | 5  | 147908544 | 147908544 | G | A    | G | R      | exonic     | HTR4      | missense | NM_001040173:p.A78V  |
| 16461 | 5  | 179065886 | 179065886 | C | T    | C | Y      | exonic     | CANX      | missense | NM_001746:p.P655     |
| 16461 | 6  | 3171032   | 3171032   | G | T    | G | K      | exonic     | TUBB2B    | missense | NM_178012:p.A97D     |
| 16461 | 6  | 4044368   | 4044368   | G | T    | G | K      | exonic     | C6orf201  | missense | NM_001085401:p.W74L  |
| 16461 | 6  | 24564784  | 24564784  | C | A    | C | M      | exonic     | GPLD1     | missense | NM_001503:p.G357C    |
| 16461 | 6  | 26199257  | 26199257  | C | T    | C | Y      | exonic     | HFE       | missense | NM_139006:p.H96Y     |
| 16461 | 6  | 28401960  | 28401960  | T | A    | T | W      | exonic     | ZNF323    | nonsense | NM_001135216:p.K395X |
| 16461 | 6  | 29749119  | 29749119  | G | C    | G | S      | exonic     | ZFP57     | missense | NM_001109809:p.R250G |
| 16461 | 6  | 32038283  | 32038283  | G | T    | G | K      | exonic     | SKIV2L    | missense | NM_006929:p.G385W    |
| 16461 | 6  | 36550754  | 36550754  | A | G    | A | R      | exonic     | KCTD20    | missense | NM_173562:p.D124G    |
| 16461 | 6  | 41992505  | 41992505  | G | C    | G | S      | exonic     | MED20     | missense | NM_004275:p.S55R     |
| 16461 | 6  | 42959231  | 42959231  | A | T    | A | W      | exonic     | RPL71     | missense | NM_198486:p.Q62L     |
| 16461 | 6  | 50894630  | 50894630  | G | C    | G | S      | exonic     | TFAP2B    | missense | NM_003221:p.E23Q     |
| 16461 | 6  | 55236465  | 55236465  | T | -    | G | */-T   | splicing   | HCRTR2    | FS_del   | NM_001526:p.G216fs   |
| 16461 | 6  | 94177383  | 94177383  | G | A    | G | R      | exonic     | EPHA7     | missense | NM_004440:p.T130I    |
| 16461 | 6  | 117220453 | 117220453 | - | AGGT | C | */+AGG | exonic     | GPRC6A    | FS_ins   | NM_148963:p.E776fs   |
| 16461 | 6  | 126283848 | 126283848 | G | T    | G | K      | exonic     | NCOA7     | nonsense | NM_001199621:p.E656X |
| 16461 | 6  | 143134953 | 143134953 | C | A    | C | M      | exonic     | HIVEP2    | missense | NM_006734:p.Q872H    |
| 16461 | 6  | 147676751 | 147676751 | A | T    | A | W      | exonic     | STXBPS    | missense | NM_001127715:p.H395L |
| 16461 | 6  | 150309322 | 150309322 | G | C    | G | S      | exonic     | ULBP2     | missense | NM_025217:p.M157I    |
| 16461 | 6  | 152748603 | 152748603 | C | A    | C | M      | exonic     | SYNE1     | nonsense | NM_182961:p.E2851X   |
| 16461 | 6  | 159380240 | 159380240 | T | A    | T | W      | exonic     | TAGAP     | missense | NM_152133:p.N48I     |
| 16461 | 7  | 7496765   | 7496765   | C | G    | C | S      | exonic     | COL28A1   | missense | NM_001037763:p.G355A |
| 16461 | 7  | 36412459  | 36412459  | C | T    | C | Y      | exonic     | ANLN      | missense | NM_018685:p.S211F    |
| 16461 | 7  | 45716690  | 45716690  | G | C    | G | S      | exonic     | ADCY1     | missense | NM_021116:p.A991P    |
| 16461 | 7  | 51063727  | 51063727  | C | A    | C | M      | exonic     | COBL      | missense | NM_015198:p.V854F    |
| 16461 | 7  | 53071619  | 53071619  | C | A    | C | M      | exonic     | POM121L12 | missense | NM_182595:p.S254Y    |
| 16461 | 7  | 55427007  | 55427007  | C | A    | C | M      | exonic     | LANCL2    | missense | NM_018697:p.Q78K     |
| 16461 | 7  | 77217048  | 77217048  | G | T    | G | K      | exonic     | RSBN1L    | missense | NM_198467:p.A359S    |
| 16461 | 7  | 89765052  | 89765052  | G | T    | G | K      | exonic     | C7orf63   | missense | NM_001160138:p.G592V |
| 16461 | 7  | 90422981  | 90422981  | C | T    | C | Y      | exonic     | CDK14     | missense | NM_012395:p.T269I    |
| 16461 | 7  | 95272032  | 95272032  | G | T    | G | K      | exonic     | DYNC11    | missense | NM_001135556:p.A19S  |
| 16461 | 7  | 100625934 | 100625934 | G | T    | G | K      | UTR3       | MOGAT3    | NA       | NA                   |
| 16461 | 7  | 107607974 | 107607974 | T | A    | T | W      | exonic     | NRCAM     | missense | NM_001193582:p.N927I |
| 16461 | 7  | 121395349 | 121395349 | A | G    | A | R      | exonic     | PTPRZ1    | missense | NM_002851:p.K78R     |
| 16461 | 7  | 131563655 | 131563655 | T | A    | T | W      | exonic     | PLXNA4    | missense | NM_020911:p.Y573F    |
| 16461 | 7  | 133783782 | 133783782 | C | T    | C | Y      | exonic     | AKR1B1    | missense | NM_001628:p.E186K    |
| 16461 | 7  | 151591120 | 151591120 | C | A    | C | M      | exonic     | MLL3      | missense | NM_170606:p.V405L    |
| 16461 | 8  | 1795734   | 1795734   | G | C    | G | S      | exonic     | ARHGEF10  | missense | NM_014629:p.C153S    |
| 16461 | 8  | 19861109  | 19861109  | T | A    | T | W      | exonic     | LPL       | missense | NM_000237:p.N359K    |
| 16461 | 8  | 24830935  | 24830935  | G | C    | G | S      | exonic     | NEFM      | missense | NM_005382:p.E554D    |
| 16461 | 8  | 32719769  | 32719769  | A | T    | A | W      | exonic     | NRG1      | missense | NM_001160004:p.N223Y |
| 16461 | 8  | 34300380  | 34300380  | T | G    | T | K      | intergenic | NA        | NA       | NA                   |
| 16461 | 8  | 86229469  | 86229469  | A | T    | A | W      | exonic     | LRRCC1    | nonsense | NM_033402:p.R564X    |
| 16461 | 8  | 87626140  | 87626140  | G | T    | G | K      | exonic     | CPNE3     | missense | NM_003909:p.Q230H    |
| 16461 | 8  | 91051864  | 91051864  | C | G    | C | S      | exonic     | NBN       | missense | NM_002485:p.G267A    |
| 16461 | 8  | 103379883 | 103379883 | C | T    | C | Y      | exonic     | UBR5      | missense | NM_015902:p.G1113R   |
| 16461 | 8  | 134194857 | 134194857 | G | C    | G | S      | exonic     | TG        | missense | NM_003235:p.E2528Q   |
| 16461 | 8  | 139675499 | 139675499 | G | A    | G | R      | exonic     | COL22A1   | missense | NM_152888:p.P1520S   |
| 16461 | 8  | 139784745 | 139784745 | C | A    | C | M      | exonic     | COL22A1   | missense | NM_152888:p.G849W    |
| 16461 | 8  | 139902637 | 139902637 | A | T    | A | W      | exonic     | COL22A1   | missense | NM_152888:p.I390N    |
| 16461 | 9  | 8309927   | 8309927   | G | T    | G | K      | exonic     | PTPRD     | missense | NM_002839:p.S1858R   |
| 16461 | 9  | 34600809  | 34600809  | C | A    | C | M      | exonic     | C9orf23   | missense | NM_148178:p.R162L    |
| 16461 | 9  | 39078457  | 39078457  | G | C    | G | S      | exonic     | CNTNAP3   | missense | NM_033655:p.F1061L   |
| 16461 | 9  | 72669189  | 72669189  | G | T    | G | K      | exonic     | TRPM3     | missense | NM_001007471:p.P79H  |
| 16461 | 9  | 93525846  | 93525846  | T | G    | T | K      | exonic     | ROR2      | missense | NM_004560:p.E917D    |
| 16461 | 9  | 98325694  | 98325694  | C | T    | C | Y      | exonic     | CDC14B    | missense | NM_033331:p.V361M    |
| 16461 | 9  | 100870706 | 100870706 | G | T    | G | K      | exonic     | COL15A1   | missense | NM_001855:p.G1296C   |
| 16461 | 9  | 105925215 | 105925215 | G | T    | G | K      | exonic     | SMC2      | missense | NM_001042550:p.R713L |
| 16461 | 9  | 115896000 | 115896000 | G | T    | G | K      | exonic     | KIF12     | missense | NM_138424:p.H325N    |
| 16461 | 9  | 124720755 | 124720755 | G | A    | G | R      | exonic     | ZBTB26    | missense | NM_020924:p.A427V    |
| 16461 | 9  | 128142692 | 128142692 | G | T    | G | K      | exonic     | FAM125B   | missense | NM_033446:p.V56L     |
| 16461 | 9  | 130795698 | 130795698 | A | T    | A | W      | exonic     | NUP188    | missense | NM_015354:p.Y974F    |
| 16461 | 9  | 131937197 | 131937197 | G | T    | G | K      | exonic     | GPR107    | missense | NM_001136558:p.Q564H |
| 16461 | 9  | 132950840 | 132950840 | C | A    | C | M      | exonic     | LAMC3     | missense | NM_006059:p.A1380E   |
| 16461 | 10 | 18310291  | 18310291  | G | -    | A | */-G   | exonic     | SLC39A12  | FS_del   | NM_152725:p.K323fs   |
| 16461 | 10 | 23522689  | 23522689  | C | A    | C | M      | exonic     | PTF1A     | missense | NM_178161:p.H279N    |
| 16461 | 10 | 24850738  | 24850738  | A | G    | A | R      | exonic     | KIAA1217  | missense | NM_001098500:p.N697S |
| 16461 | 10 | 34688211  | 34688211  | T | C    | T | Y      | exonic     | PARD3     | missense | NM_001184785:p.N646S |
| 16461 | 10 | 35882090  | 35882090  | G | T    | G | K      | exonic     | CCNY      | missense | NM_181698:p.Q185H    |
| 16461 | 10 | 54197985  | 54197985  | C | G    | C | S      | exonic     | MBL2      | missense | NM_000242:p.C222S    |
| 16461 | 10 | 59667516  | 59667516  | C | A    | C | M      | exonic     | IPMK      | nonsense | NM_152230:p.E86X     |
| 16461 | 10 | 60219055  | 60219055  | G | T    | G | K      | exonic     | BICC1     | nonsense | NM_001080512:p.E210X |
| 16461 | 10 | 98277860  | 98277860  | C | T    | C | Y      | exonic     | TM9SF3    | missense | NM_020123:p.V487M    |
| 16461 | 10 | 108417470 | 108417470 | C | A    | C | M      | exonic     | SORCS1    | missense | NM_001013031:p.C757F |
| 16461 | 10 | 115517207 | 115517207 | A | T    | A | W      | exonic     | C10orf81  | missense | NM_001193434:p.Y25F  |

|       |    |           |           |   |   |   |      |            |          |          |                      |
|-------|----|-----------|-----------|---|---|---|------|------------|----------|----------|----------------------|
| 16461 | 10 | 116082968 | 116082968 | A | G | A | R    | splicing   | AFAP1L2  | NA       | NA                   |
| 16461 | 10 | 116909801 | 116909801 | T | A | T | W    | exonic     | ATRN1    | nonsense | NM_207303:p.C280X    |
| 16461 | 10 | 116956529 | 116956529 | G | C | G | S    | splicing   | ATRN1    | NA       | NA                   |
| 16461 | 10 | 118425906 | 118425906 | G | T | G | K    | exonic     | HSPA12A  | missense | NM_025015:p.H462N    |
| 16461 | 10 | 129795058 | 129795058 | G | C | G | S    | exonic     | MK167    | missense | NM_002417:p.S1679C   |
| 16461 | 10 | 134972884 | 134972884 | G | A | G | R    | splicing   | ZNF511   | missense | NM_145806:p.D52N     |
| 16461 | 11 | 3072084   | 3072084   | - | A | C | */+A | exonic     | OSBPL5   | FS_ins   | NM_145638:p.A492fs   |
| 16461 | 11 | 4572116   | 4572116   | C | A | C | M    | exonic     | OR521I   | nonsense | NM_001005169:p.S91X  |
| 16461 | 11 | 4977525   | 4977525   | A | T | A | W    | exonic     | OR51L1   | missense | NM_001004755:p.H246L |
| 16461 | 11 | 11934293  | 11934293  | G | T | G | K    | exonic     | USP47    | missense | NM_017944:p.D1287Y   |
| 16461 | 11 | 21551487  | 21551487  | G | T | G | K    | exonic     | NELL1    | missense | NM_201551:p.V733L    |
| 16461 | 11 | 22355581  | 22355581  | G | - | T | */-G | exonic     | SLC17A6  | FS_del   | NM_020346:p.G490fs   |
| 16461 | 11 | 36571231  | 36571231  | G | T | G | K    | exonic     | RAG2     | missense | NM_000536:p.T355N    |
| 16461 | 11 | 47729390  | 47729390  | T | G | T | K    | exonic     | FNBPA    | missense | NM_015308:p.E222D    |
| 16461 | 11 | 48284924  | 48284924  | A | C | A | M    | exonic     | OR45I    | missense | NM_001004725:p.M192L |
| 16461 | 11 | 49959805  | 49959805  | G | C | G | S    | exonic     | OR4C12   | missense | NM_001005270:p.A270G |
| 16461 | 11 | 55015121  | 55015121  | G | T | G | K    | intergenic | NA       | NA       | NA                   |
| 16461 | 11 | 55595275  | 55595275  | C | T | C | Y    | intergenic | NA       | NA       | NA                   |
| 16461 | 11 | 55661538  | 55661538  | G | T | G | K    | exonic     | OR8J3    | missense | NM_001004064:p.A78D  |
| 16461 | 11 | 55683634  | 55683634  | T | A | T | W    | exonic     | OR8K5    | missense | NM_001004058:p.T246S |
| 16461 | 11 | 57926579  | 57926579  | C | A | C | M    | exonic     | OR5B3    | nonsense | NM_001005469:p.E294X |
| 16461 | 11 | 58031411  | 58031411  | G | C | G | S    | exonic     | OR5B21   | missense | NM_001005218:p.F248L |
| 16461 | 11 | 59387982  | 59387982  | T | G | T | K    | exonic     | TCN1     | missense | NM_001062:p.Q78P     |
| 16461 | 11 | 63642165  | 63642165  | - | T | C | */+T | exonic     | FLRT1    | FS_ins   | NM_013280:p.P617fs   |
| 16461 | 11 | 63842333  | 63842333  | C | G | C | S    | exonic     | PRDX5    | missense | NM_181652:p.Q24E     |
| 16461 | 11 | 64426087  | 64426087  | T | C | T | Y    | exonic     | ATG2A    | missense | NM_015104:p.R1348G   |
| 16461 | 11 | 66015639  | 66015639  | C | G | C | S    | exonic     | DPP3     | missense | NM_130443:p.F299L    |
| 16461 | 11 | 88775234  | 88775234  | G | T | G | T    | exonic     | NOX4     | missense | NM_016931:p.P252T    |
| 16461 | 11 | 107887533 | 107887533 | T | A | T | W    | exonic     | EXPH5    | missense | NM_015065:p.E1304V   |
| 16461 | 11 | 123353389 | 123353389 | G | T | G | K    | exonic     | OR10S1   | missense | NM_001004474:p.H74N  |
| 16461 | 12 | 4504783   | 4504783   | G | A | G | R    | exonic     | C12orf4  | missense | NM_020374:p.S209L    |
| 16461 | 12 | 9797436   | 9797436   | A | G | A | R    | exonic     | CD69     | missense | NM_001781:p.S170P    |
| 16461 | 12 | 12868204  | 12868204  | G | C | G | S    | exonic     | DDX47    | missense | NM_016355:p.G295A    |
| 16461 | 12 | 15561045  | 15561045  | G | C | G | S    | exonic     | PTPRO    | missense | NM_002848:p.G556A    |
| 16461 | 12 | 32866817  | 32866817  | C | A | C | M    | exonic     | PKP2     | missense | NM_001005242:p.V564L |
| 16461 | 12 | 38297145  | 38297145  | T | A | T | W    | exonic     | ABCD2    | missense | NM_005164:p.E344D    |
| 16461 | 12 | 51196747  | 51196747  | C | A | C | M    | exonic     | KRT5     | missense | NM_000424:p.K460N    |
| 16461 | 12 | 61830648  | 61830648  | G | T | G | K    | exonic     | AVPR1A   | missense | NM_000706:p.T79K     |
| 16461 | 12 | 63104652  | 63104652  | G | T | G | K    | exonic     | XPOT     | missense | NM_007235:p.D397Y    |
| 16461 | 12 | 69342612  | 69342612  | C | T | C | Y    | exonic     | PTPRR    | missense | NM_002849:p.G513E    |
| 16461 | 12 | 70236666  | 70236666  | A | G | A | R    | splicing   | LGR5     | silent   | NM_003667:p.L215L    |
| 16461 | 12 | 81304740  | 81304740  | G | T | G | K    | exonic     | C12orf26 | missense | NM_032230:p.C96F     |
| 16461 | 12 | 99130248  | 99130248  | A | T | A | W    | exonic     | ACTR6    | missense | NM_022496:p.D219V    |
| 16461 | 12 | 104129148 | 104129148 | C | A | C | M    | exonic     | APPL2    | missense | NM_018171:p.K121N    |
| 16461 | 12 | 116142342 | 116142342 | A | T | A | W    | exonic     | NOS1     | missense | NM_000620:p.L1364H   |
| 16461 | 12 | 119919728 | 119919728 | C | A | C | M    | exonic     | HNF1A    | missense | NM_000545:p.Q460K    |
| 16461 | 12 | 128260102 | 128260102 | T | G | T | K    | exonic     | TMEM132D | missense | NM_133448:p.K453N    |
| 16461 | 12 | 131891384 | 131891384 | C | A | C | M    | exonic     | GOLGA3   | missense | NM_005895:p.D530Y    |
| 16461 | 13 | 22803236  | 22803236  | G | A | G | R    | exonic     | SACS     | missense | NM_014363:p.S4260F   |
| 16461 | 13 | 31876468  | 31876468  | C | T | C | Y    | exonic     | N4BP2L1  | missense | NM_052818:p.E155K    |
| 16461 | 13 | 74953705  | 74953705  | T | C | T | Y    | exonic     | TBC1D4   | missense | NM_014832:p.Q67R     |
| 16461 | 13 | 85267386  | 85267386  | C | A | C | M    | exonic     | SLITRK6  | missense | NM_032229:p.G420V    |
| 16461 | 13 | 95306460  | 95306460  | G | C | G | S    | exonic     | UGGT2    | missense | NM_020121:p.L1321V   |
| 16461 | 13 | 96437900  | 96437900  | T | A | T | W    | exonic     | OXGR1    | missense | NM_080818:p.I39F     |
| 16461 | 14 | 19474205  | 19474205  | C | A | C | M    | exonic     | OR4K1    | missense | NM_001004063:p.D180E |
| 16461 | 14 | 23690616  | 23690616  | G | T | G | K    | exonic     | RNF31    | missense | NM_017999:p.R607L    |
| 16461 | 14 | 64803138  | 64803138  | C | T | C | Y    | intergenic | NA       | NA       | NA                   |
| 16461 | 14 | 69514388  | 69514388  | G | A | G | R    | splicing   | SMOC1    | missense | NM_022137:p.G160D    |
| 16461 | 14 | 72729214  | 72729214  | C | T | C | Y    | exonic     | PSEN1    | nonsense | NM_007318:p.R216X    |
| 16461 | 14 | 74671438  | 74671438  | T | G | T | K    | exonic     | TMED10   | missense | NM_006827:p.Y188S    |
| 16461 | 14 | 75418848  | 75418848  | G | T | G | K    | exonic     | TTL5     | missense | NM_015072:p.R1197I   |
| 16461 | 14 | 95207471  | 95207471  | G | T | G | K    | ncRNA      | TCL6     | NA       | NA                   |
| 16461 | 15 | 26184426  | 26184426  | T | A | T | W    | exonic     | HERC2    | missense | NM_004667:p.K601N    |
| 16461 | 15 | 55794084  | 55794084  | G | C | G | S    | exonic     | GCOM1    | missense | NM_001018090:p.R523P |
| 16461 | 15 | 62293196  | 62293196  | T | A | T | W    | exonic     | CSNK1G1  | nonsense | NM_022048:p.K209X    |
| 16461 | 15 | 71965957  | 71965957  | G | C | G | S    | exonic     | TBC1D21  | missense | NM_153356:p.C243S    |
| 16461 | 15 | 78988632  | 78988632  | A | G | A | R    | exonic     | KIAA1199 | missense | NM_018689:p.Y576C    |
| 16461 | 16 | 19566654  | 19566654  | G | T | G | K    | exonic     | C16orf62 | missense | NM_020314:p.E748D    |
| 16461 | 16 | 21044014  | 21044014  | G | C | G | S    | exonic     | DNAH3    | missense | NM_017539:p.L463V    |
| 16461 | 16 | 21180114  | 21180114  | G | C | G | S    | exonic     | CRYM     | missense | NM_001888:p.P281R    |
| 16461 | 16 | 24280320  | 24280320  | G | T | G | K    | exonic     | CACNG3   | missense | NM_006539:p.V195F    |
| 16461 | 16 | 24487776  | 24487776  | G | T | G | K    | exonic     | RBBP6    | missense | NM_018703:p.R721L    |
| 16461 | 16 | 24708867  | 24708867  | G | C | G | S    | exonic     | TNRC6A   | missense | NM_014494:p.G468A    |
| 16461 | 16 | 30013604  | 30013604  | G | A | G | R    | intronic   | YPEL3    | NA       | NA                   |
| 16461 | 16 | 30981095  | 30981095  | T | A | T | W    | exonic     | ZNF668   | missense | NM_001172669:p.T242S |
| 16461 | 16 | 46680023  | 46680023  | G | T | G | K    | exonic     | ABCC12   | missense | NM_033226:p.L1137I   |
| 16461 | 16 | 60318499  | 60318499  | T | A | T | W    | splicing   | CDH8     | missense | NM_001796:p.Q512H    |
| 16461 | 16 | 69512218  | 69512218  | G | A | G | R    | exonic     | HYDIN    | missense | NM_032821:p.T2520M   |
| 16461 | 16 | 69660817  | 69660817  | G | T | G | K    | exonic     | HYDIN    | missense | NM_001198542:p.H637N |

|       |    |           |           |   |   |   |   |          |           |          |                      |
|-------|----|-----------|-----------|---|---|---|---|----------|-----------|----------|----------------------|
| 16461 | 17 | 6369402   | 6369402   | T | C | T | Y | exonic   | PITPNM3   | missense | NM_031220:p.Q75R     |
| 16461 | 17 | 7519186   | 7519186   | C | A | C | M | exonic   | TP53      | missense | NM_001126117:p.V25F  |
| 16461 | 17 | 11534021  | 11534021  | G | T | G | K | exonic   | DNAH9     | missense | NM_001372:p.W1386L   |
| 16461 | 17 | 23991079  | 23991079  | T | C | T | Y | exonic   | KIAA0100  | missense | NM_014680:p.M328V    |
| 16461 | 17 | 24033061  | 24033061  | G | T | G | K | exonic   | SUPT6H    | missense | NM_003170:p.R511S    |
| 16461 | 17 | 24034432  | 24034432  | A | T | A | W | exonic   | SUPT6H    | missense | NM_003170:p.Y633F    |
| 16461 | 17 | 25536618  | 25536618  | G | C | G | S | exonic   | CCDC55    | missense | NM_032141:p.E493Q    |
| 16461 | 17 | 27825015  | 27825015  | G | A | G | R | exonic   | PSMD11    | missense | NM_002815:p.D243N    |
| 16461 | 17 | 46178309  | 46178309  | G | T | G | K | exonic   | LUC7L3    | missense | NM_006107:p.C308F    |
| 16461 | 17 | 53710397  | 53710397  | C | T | C | Y | exonic   | MPO       | missense | NM_000250:p.A332T    |
| 16461 | 17 | 57023200  | 57023200  | C | A | C | M | exonic   | NACA2     | missense | NM_199290:p.D42Y     |
| 16461 | 17 | 59303650  | 59303650  | C | A | C | M | exonic   | CSH2      | missense | NM_022644:p.V159F    |
| 16461 | 17 | 60287476  | 60287476  | C | T | C | Y | exonic   | LRR37A3   | missense | NM_199340:p.E1084K   |
| 16461 | 17 | 60630798  | 60630798  | G | T | G | K | exonic   | RG59      | missense | NM_001081955:p.D371Y |
| 16461 | 17 | 63164444  | 63164444  | G | T | G | K | exonic   | NOL11     | nonsense | NM_015462:p.E475X    |
| 16461 | 17 | 64595099  | 64595099  | A | T | A | W | exonic   | ABCA6     | missense | NM_080284:p.I1270N   |
| 16461 | 18 | 325206    | 325206    | C | T | C | Y | exonic   | COLEC12   | missense | NM_130386:p.R451K    |
| 16461 | 18 | 7030175   | 7030175   | C | T | C | Y | exonic   | LAMA1     | missense | NM_005559:p.C441Y    |
| 16461 | 18 | 14514972  | 14514972  | T | A | T | W | exonic   | POTEC     | missense | NM_001137671:p.L379F |
| 16461 | 18 | 14744947  | 14744947  | C | A | C | M | exonic   | ANKRD30B  | missense | NM_001145029:p.T187N |
| 16461 | 18 | 20151119  | 20151119  | C | A | C | M | exonic   | OSBPL1A   | missense | NM_080597:p.V288L    |
| 16461 | 18 | 20264297  | 20264297  | A | T | A | W | exonic   | IMPACT    | nonsense | NM_018439:p.K78X     |
| 16461 | 18 | 21060333  | 21060333  | G | A | G | R | exonic   | ZNF521    | missense | NM_015461:p.P516L    |
| 16461 | 18 | 27352199  | 27352199  | G | C | G | S | splicing | DSG2      | NA       | NA                   |
| 16461 | 18 | 32552540  | 32552540  | G | C | G | S | exonic   | FHOD3     | missense | NM_025135:p.R919P    |
| 16461 | 18 | 37871739  | 37871739  | G | T | G | K | exonic   | PIK3C3    | missense | NM_002647:p.R642L    |
| 16461 | 18 | 40784483  | 40784483  | G | C | G | S | exonic   | SETBP1    | missense | NM_015559:p.E394Q    |
| 16461 | 18 | 45362743  | 45362743  | G | T | G | K | exonic   | LIPG      | missense | NM_006033:p.Q350H    |
| 16461 | 18 | 45820604  | 45820604  | C | G | C | S | exonic   | MYO5B     | missense | NM_001080467:p.D73H  |
| 16461 | 18 | 49230869  | 49230869  | G | A | G | R | splicing | DCC       | silent   | NM_005215:p.E1077E   |
| 16461 | 18 | 49267252  | 49267252  | C | A | C | M | exonic   | DCC       | missense | NM_005215:p.P1275Q   |
| 16461 | 18 | 53175392  | 53175392  | T | A | T | W | exonic   | ST8SIA3   | missense | NM_015879:p.F185I    |
| 16461 | 18 | 57318660  | 57318660  | G | T | G | K | exonic   | CDH20     | missense | NM_031891:p.R202S    |
| 16461 | 19 | 1779147   | 1779147   | C | G | C | S | exonic   | REXO1     | missense | NM_020695:p.R214P    |
| 16461 | 19 | 4122691   | 4122691   | G | T | G | K | exonic   | CREB3L3   | missense | NM_032607:p.V371L    |
| 16461 | 19 | 11005877  | 11005877  | G | A | G | R | splicing | SMARCA4   | NA       | NA                   |
| 16461 | 19 | 19683442  | 19683442  | C | T | C | Y | exonic   | ZNF14     | missense | NM_021030:p.E550K    |
| 16461 | 19 | 23628883  | 23628883  | T | G | T | K | exonic   | ZNF675    | missense | NM_138330:p.Q231P    |
| 16461 | 19 | 40445307  | 40445307  | T | G | T | K | exonic   | LSR       | missense | NM_205834:p.V265G    |
| 16461 | 19 | 41024992  | 41024992  | A | C | A | M | exonic   | NPH51     | missense | NM_004646:p.L846R    |
| 16461 | 19 | 47258826  | 47258826  | C | A | C | M | exonic   | GRIK5     | missense | NM_002088:p.G89V     |
| 16461 | 19 | 52277392  | 52277392  | C | G | C | S | splicing | ZC3H4     | missense | NM_015168:p.G407R    |
| 16461 | 19 | 63542369  | 63542369  | G | C | G | S | exonic   | ZSCAN22   | missense | NM_181846:p.Q447H    |
| 16461 | 20 | 2589617   | 2589617   | T | C | T | Y | splicing | IDH3B     | NA       | NA                   |
| 16461 | 20 | 5117719   | 5117719   | G | T | G | K | exonic   | CDS2      | missense | NM_003818:p.V330F    |
| 16461 | 20 | 8667968   | 8667968   | A | G | A | R | exonic   | PLCB1     | missense | NM_182734:p.I757V    |
| 16461 | 20 | 16440125  | 16440125  | T | G | T | K | exonic   | KIF16B    | missense | NM_001199865:p.K165T |
| 16461 | 20 | 34306960  | 34306960  | G | T | G | K | exonic   | C20orf4   | missense | NM_015511:p.R345I    |
| 16461 | 20 | 34493952  | 34493952  | C | A | C | M | exonic   | DLGAP4    | missense | NM_014902:p.R140S    |
| 16461 | 20 | 43315658  | 43315658  | G | T | G | K | exonic   | SLPI      | nonsense | NM_003064:p.C72X     |
| 16461 | 20 | 60553909  | 60553909  | C | G | C | S | ncRNA    | C20orf200 | NA       | NA                   |
| 16461 | 21 | 21704508  | 21704508  | G | C | G | S | exonic   | NCAM2     | missense | NM_004540:p.W413C    |
| 16461 | 21 | 33805610  | 33805610  | C | A | C | M | exonic   | GART      | missense | NM_000819:p.R711S    |
| 16461 | 21 | 33848274  | 33848274  | G | T | G | K | exonic   | SON       | missense | NM_138927:p.V1623F   |
| 16461 | 21 | 36542725  | 36542725  | A | T | A | W | exonic   | DOPEY2    | nonsense | NM_005128:p.K1663X   |
| 16461 | 21 | 37361501  | 37361501  | C | T | C | Y | exonic   | PIGP      | missense | NM_153681:p.G93S     |
| 16461 | 21 | 39756230  | 39756230  | G | T | G | K | exonic   | SH3BGR    | missense | NM_007341:p.K98N     |
| 16461 | 22 | 15452024  | 15452024  | C | T | C | Y | exonic   | CCT8L2    | missense | NM_014406:p.G473S    |
| 16461 | 22 | 15668864  | 15668864  | G | T | G | K | exonic   | XKR3      | missense | NM_175878:p.P34T     |
| 16461 | 22 | 20644762  | 20644762  | C | A | C | M | exonic   | TOP3B     | missense | NM_003935:p.V529L    |
| 16461 | 22 | 22789466  | 22789466  | G | T | G | K | exonic   | CABIN1    | nonsense | NM_001201429:p.G531X |
| 16461 | 22 | 30053135  | 30053135  | C | A | C | M | exonic   | PATZ1     | missense | NM_032050:p.E556D    |
| 16461 | 22 | 35601683  | 35601683  | G | A | G | R | exonic   | NCF4      | missense | NM_000631:p.V224M    |
| 16461 | 22 | 38240008  | 38240008  | G | T | G | K | exonic   | SMCR7L    | missense | NM_019008:p.A376S    |
| 16461 | 22 | 40303327  | 40303327  | G | C | G | S | exonic   | PMM1      | missense | NM_002676:p.Q244E    |
| 16461 | 22 | 42396122  | 42396122  | G | C | G | S | exonic   | EFCAB6    | missense | NM_198856:p.Q441E    |
| 16461 | X  | 13664642  | 13664642  | C | T | C | Y | exonic   | OFD1      | missense | NM_003611:p.A79V     |
| 16461 | X  | 27908371  | 27908371  | T | A | T | W | exonic   | DCAF8L1   | missense | NM_001017930:p.K334N |
| 16461 | X  | 36938425  | 36938425  | G | C | G | S | exonic   | FAM47C    | missense | NM_001013736:p.G674A |
| 16461 | X  | 48342977  | 48342977  | G | T | G | K | exonic   | WDR13     | missense | NM_017883:p.D151Y    |
| 16461 | X  | 48710599  | 48710599  | T | A | T | W | exonic   | KCND1     | missense | NM_004979:p.T342S    |
| 16461 | X  | 50356485  | 50356485  | G | T | G | K | exonic   | SHROOM4   | missense | NM_020717:p.Q1478K   |
| 16461 | X  | 77799705  | 77799705  | C | A | C | M | exonic   | ZCCHC5    | missense | NM_152694:p.W290L    |
| 16461 | X  | 77799712  | 77799712  | C | A | C | M | exonic   | ZCCHC5    | nonsense | NM_152694:p.G288X    |
| 16461 | X  | 91020657  | 91020657  | G | T | G | K | exonic   | PCDH11X   | missense | NM_032969:p.W921L    |
| 16461 | X  | 106218548 | 106218548 | G | A | G | R | exonic   | RBM41     | missense | NM_018301:p.S234L    |
| 16461 | X  | 118655087 | 118655087 | T | A | T | W | exonic   | 41158     | missense | NM_015129:p.E296V    |
| 16461 | X  | 125513264 | 125513264 | C | T | C | Y | exonic   | DCAF12L1  | missense | NM_178470:p.D337N    |
| 16617 | 1  | 41821668  | 41821668  | T | G | T | K | exonic   | HIVEP3    | missense | NM_001127714:p.E463A |

|       |    |           |           |       |   |   |      |            |           |          |                      |
|-------|----|-----------|-----------|-------|---|---|------|------------|-----------|----------|----------------------|
| 16617 | 1  | 47173858  | 47173858  | G     | A | G | R    | exonic     | CYP4A11   | nonsense | NM_000778:p.Q187X    |
| 16617 | 1  | 100406606 | 100406606 | C     | T | C | Y    | exonic     | LRRC39    | missense | NM_144620:p.E19K     |
| 16617 | 1  | 103236488 | 103236488 | C     | A | C | M    | exonic     | COL11A1   | missense | NM_001854:p.G721V    |
| 16617 | 1  | 156565858 | 156565858 | T     | A | T | W    | exonic     | CD1B      | missense | NM_001764:p.D271V    |
| 16617 | 1  | 156881950 | 156881950 | C     | T | C | Y    | exonic     | SPTA1     | missense | NM_003126:p.E1319K   |
| 16617 | 1  | 195337089 | 195337089 | T     | A | T | W    | exonic     | ASPM      | nonsense | NM_018136:p.K2639X   |
| 16617 | 2  | 11307258  | 11307258  | T     | C | T | Y    | exonic     | ROCK2     | missense | NM_004850:p.N148D    |
| 16617 | 2  | 27276840  | 27276840  | A     | C | A | M    | exonic     | SLC5A6    | missense | NM_021095:p.S626A    |
| 16617 | 2  | 48439760  | 48439760  | A     | T | A | W    | exonic     | FOXN2     | missense | NM_002158:p.K203M    |
| 16617 | 2  | 85835517  | 85835517  | A     | G | A | R    | exonic     | ATOX1B    | missense | NM_032827:p.R232G    |
| 16617 | 2  | 91434890  | 91434890  | T     | G | T | K    | intergenic | NA        | NA       | NA                   |
| 16617 | 2  | 100947066 | 100947066 | T     | A | T | W    | exonic     | NPAS2     | nonsense | NM_002518:p.L238X    |
| 16617 | 2  | 131131028 | 131131028 | G     | A | G | R    | intergenic | NA        | NA       | NA                   |
| 16617 | 2  | 136105909 | 136105909 | G     | C | G | S    | exonic     | R3HDM1    | missense | NM_015361:p.R189P    |
| 16617 | 2  | 144873038 | 144873038 | G     | C | G | S    | exonic     | ZEB2      | missense | NM_014795:p.P729R    |
| 16617 | 2  | 211164895 | 211164895 | G     | T | G | K    | exonic     | CPS1      | missense | NM_001122633:p.G354V |
| 16617 | 3  | 99334527  | 99334527  | T     | C | T | Y    | exonic     | OR5H1     | missense | NM_001005338:p.I99T  |
| 16617 | 3  | 102446147 | 102446147 | G     | A | G | R    | exonic     | IMPG2     | missense | NM_016247:p.T573I    |
| 16617 | 3  | 140148040 | 140148055 | TCGGC | - | C | *-/  | exonic     | FOXL2     | FS_del   | NM_023067:p.67_72del |
| 16617 | 3  | 168665965 | 168665965 | T     | A | T | W    | exonic     | SERPINI2  | missense | NM_006217:p.K223N    |
| 16617 | 4  | 163174261 | 163174261 | C     | A | C | M    | splicing   | FSTL5     | NA       | NA                   |
| 16617 | 5  | 10455101  | 10455119  | TAATA | - | T | *-/  | intronic   | 40974     | NA       | NA                   |
| 16617 | 5  | 36147118  | 36147118  | C     | A | C | M    | splicing   | LMBRD2    | NA       | NA                   |
| 16617 | 6  | 30274486  | 30274486  | C     | A | C | M    | exonic     | TRIM26    | missense | NM_003449:p.R125L    |
| 16617 | 6  | 31791140  | 31791140  | T     | C | T | Y    | exonic     | LY6G6D    | missense | NM_021246:p.L10P     |
| 16617 | 6  | 88051226  | 88051226  | G     | C | G | S    | exonic     | GJB7      | missense | NM_198568:p.H42D     |
| 16617 | 6  | 108325572 | 108325572 | C     | T | C | Y    | exonic     | SEC63     | missense | NM_007214:p.V472I    |
| 16617 | 6  | 155195790 | 155195790 | C     | T | C | Y    | exonic     | SCAF8     | nonsense | NM_014892:p.R1129X   |
| 16617 | 7  | 72735092  | 72735092  | C     | G | C | S    | exonic     | DNAJC30   | missense | NM_032317:p.G200R    |
| 16617 | 7  | 81473027  | 81473027  | G     | A | G | R    | exonic     | CACNA2D1  | missense | NM_000722:p.P502L    |
| 16617 | 7  | 93876622  | 93876622  | G     | T | G | K    | exonic     | COL1A2    | missense | NM_000089:p.R282L    |
| 16617 | 7  | 106297104 | 106297104 | C     | A | C | M    | exonic     | PIK3CG    | missense | NM_002649:p.A621D    |
| 16617 | 8  | 108403416 | 108403416 | T     | C | T | Y    | exonic     | ANGPT1    | missense | NM_001199859:p.Q231R |
| 16617 | 9  | 13112126  | 13112126  | C     | A | C | M    | exonic     | MPDZ      | missense | NM_003829:p.C1666F   |
| 16617 | 9  | 85448342  | 85448342  | A     | T | A | W    | exonic     | C9orf103  | missense | NM_001001551:p.I131F |
| 16617 | 9  | 89687793  | 89687793  | G     | T | G | K    | exonic     | C9orf79   | missense | NM_178828:p.W56L     |
| 16617 | 9  | 127737658 | 127737658 | A     | T | A | W    | exonic     | PBX3      | missense | NM_001134778:p.E190V |
| 16617 | 10 | 49056122  | 49056122  | C     | T | C | Y    | exonic     | FRMPD2    | missense | NM_001018071:p.D957N |
| 16617 | 10 | 59824794  | 59824794  | G     | T | G | K    | exonic     | TFAM      | missense | NM_003201:p.R232L    |
| 16617 | 10 | 68649635  | 68649635  | C     | A | C | M    | splicing   | CTNNA3    | NA       | NA                   |
| 16617 | 10 | 127833864 | 127833864 | T     | A | T | W    | splicing   | ADAM12    | missense | NM_021641:p.E87D     |
| 16617 | 11 | 5419293   | 5419293   | G     | T | G | K    | exonic     | OR511     | missense | NM_001005288:p.Q10K  |
| 16617 | 11 | 56267559  | 56267559  | G     | A | G | R    | exonic     | OR9G4     | missense | NM_001005284:p.S102L |
| 16617 | 11 | 123316376 | 123316376 | G     | C | G | S    | exonic     | OR4D5     | missense | NM_001001965:p.M281I |
| 16617 | 12 | 101812828 | 101812828 | T     | - | C | *-/T | splicing   | PAH       | NA       | NA                   |
| 16617 | 12 | 102646776 | 102646776 | A     | C | A | M    | exonic     | STAB2     | missense | NM_017564:p.Y1652S   |
| 16617 | 13 | 25002190  | 25002190  | T     | A | T | W    | exonic     | ATP8A2    | missense | NM_016529:p.I92N     |
| 16617 | 13 | 52522488  | 52522488  | C     | G | C | S    | exonic     | OLFM4     | missense | NM_006418:p.R372G    |
| 16617 | 13 | 91143517  | 91143517  | C     | - | G | *-/C | exonic     | GPC5      | FS_del   | NM_004466:p.A134fs   |
| 16617 | 14 | 46635968  | 46635968  | G     | T | G | K    | exonic     | MDGA2     | missense | NM_001113498:p.T345N |
| 16617 | 14 | 93122988  | 93122988  | G     | T | G | K    | exonic     | KIAA1409  | missense | NM_020818:p.D828Y    |
| 16617 | 15 | 43510258  | 43510258  | A     | G | A | R    | splicing   | C15orf48  | NA       | NA                   |
| 16617 | 15 | 46542699  | 46542699  | T     | A | T | W    | exonic     | FBN1      | missense | NM_000138:p.Y1699F   |
| 16617 | 16 | 2290070   | 2290070   | G     | T | G | K    | exonic     | ABCA3     | missense | NM_001089:p.N516K    |
| 16617 | 16 | 60318560  | 60318560  | T     | A | T | W    | exonic     | CDH8      | missense | NM_001796:p.N492I    |
| 16617 | 16 | 88363855  | 88363855  | G     | C | G | S    | exonic     | FANCA     | missense | NM_000135:p.P799A    |
| 16617 | 17 | 5300126   | 5300126   | T     | C | T | Y    | exonic     | DHX33     | missense | NM_020162:p.D317G    |
| 16617 | 17 | 10381529  | 10381529  | T     | A | T | W    | exonic     | MYH2      | missense | NM_017534:p.D548V    |
| 16617 | 17 | 16796599  | 16796599  | C     | T | C | Y    | exonic     | TNFRSF13B | missense | NM_012452:p.V29M     |
| 16617 | 17 | 36111661  | 36111661  | A     | C | A | M    | exonic     | KRT24     | missense | NM_019016:p.N222K    |
| 16617 | 17 | 59129741  | 59129741  | A     | C | A | M    | exonic     | LIMD2     | missense | NM_030576:p.F96C     |
| 16617 | 19 | 14134628  | 14134628  | C     | T | C | Y    | exonic     | LPHN1     | missense | NM_014921:p.D329N    |
| 16617 | 19 | 22155590  | 22155590  | C     | A | C | M    | exonic     | ZNF676    | nonsense | NM_001001411:p.E257X |
| 16617 | 19 | 40710834  | 40710834  | C     | A | C | M    | exonic     | SBSN      | nonsense | NM_198538:p.E64X     |
| 16617 | 19 | 40710835  | 40710835  | C     | A | C | M    | exonic     | SBSN      | missense | NM_198538:p.R63S     |
| 16617 | 20 | 50202217  | 50202217  | C     | A | C | M    | exonic     | ZFP64     | missense | NM_018197:p.A641S    |
| 16617 | 21 | 42284900  | 42284900  | G     | A | G | R    | exonic     | ZNF295    | missense | NM_001098403:p.R591W |
| 16617 | 22 | 40937196  | 40937196  | C     | G | C | S    | exonic     | TCF20     | missense | NM_005650:p.A1354P   |
| 16617 | X  | 3250170   | 3250170   | G     | C | G | S    | exonic     | MXRA5     | missense | NM_015419:p.Q1186E   |
| 16617 | X  | 21779645  | 21779645  | C     | T | C | Y    | exonic     | MBTPS2    | missense | NM_015884:p.A179V    |
| 16617 | X  | 77175949  | 77175949  | C     | - | T | *-/C | exonic     | ATP7A     | FS_del   | NM_000052:p.S1162fs  |
| 16617 | X  | 78102884  | 78102884  | A     | G | A | R    | exonic     | P2RY10    | missense | NM_014499:p.I71V     |
| 16617 | X  | 138684608 | 138684608 | C     | A | C | M    | exonic     | ATP11C    | missense | NM_173694:p.S711I    |
| 16617 | M  | 12773     | 12773     | G     | A | G | R    | intergenic | NA        | NA       | NA                   |
| 16989 | 1  | 27748721  | 27748721  | C     | A | C | M    | exonic     | AHDC1     | missense | NM_001029882:p.E831D |
| 16989 | 1  | 151579523 | 151579523 | G     | A | G | R    | exonic     | PGLYRP4   | missense | NM_020393:p.S261F    |
| 16989 | 1  | 173371663 | 173371663 | G     | - | T | *-/G | exonic     | TNN       | FS_del   | NM_022093:p.V1130fs  |
| 16989 | 1  | 195185291 | 195185291 | G     | A | G | R    | exonic     | CFHR2     | missense | NM_005666:p.G48R     |
| 16989 | 1  | 199236532 | 199236532 | C     | A | C | M    | splicing   | KIF21B    | NA       | NA                   |

|       |    |           |           |   |   |   |      |            |          |          |                       |
|-------|----|-----------|-----------|---|---|---|------|------------|----------|----------|-----------------------|
| 16989 | 1  | 245655305 | 245655305 | C | A | C | M    | exonic     | NLRP3    | missense | NM_001079821:p.A646D  |
| 16989 | 2  | 25323041  | 25323041  | G | - | A | */-G | exonic     | DNMT3A   | FS_del   | NM_022552:p.L411fs    |
| 16989 | 2  | 48661753  | 48661753  | G | T | G | K    | exonic     | STON1    | missense | NM_006873:p.Q159H     |
| 16989 | 2  | 80383448  | 80383448  | G | T | G | K    | exonic     | LRRTM1   | nonsense | NM_178839:p.Y336X     |
| 16989 | 3  | 123485778 | 123485778 | A | T | A | W    | exonic     | CASR     | missense | NM_001178065:p.I773F  |
| 16989 | 5  | 50719207  | 50719207  | C | G | C | S    | exonic     | ISL1     | missense | NM_002202:p.I115M     |
| 16989 | 5  | 168133912 | 168133912 | C | T | C | Y    | exonic     | SLIT3    | missense | NM_003062:p.D401N     |
| 16989 | 7  | 27101485  | 27101485  | C | A | C | M    | exonic     | HOXA1    | missense | NM_005522:p.C191F     |
| 16989 | 11 | 15203920  | 15203920  | G | T | G | K    | exonic     | INSC     | missense | NM_001031853:p.Q427H  |
| 16989 | 11 | 47776498  | 47776498  | G | C | G | S    | exonic     | NUP160   | missense | NM_015231:p.Q997E     |
| 16989 | 12 | 56252143  | 56252143  | G | T | G | K    | exonic     | KIF5A    | missense | NM_004984:p.K465N     |
| 16989 | 13 | 29680852  | 29680852  | C | A | C | M    | exonic     | KATNAL1  | missense | NM_032116:p.R433I     |
| 16989 | 14 | 94975763  | 94975763  | C | T | C | Y    | exonic     | C14orf49 | missense | NM_152592:p.E729K     |
| 16989 | 15 | 63410495  | 63410495  | G | T | G | K    | exonic     | IGDCC3   | missense | NM_004884:p.P503T     |
| 16989 | 15 | 72213278  | 72213278  | C | A | C | M    | exonic     | ISLR2    | missense | NM_001130137:p.P377H  |
| 16989 | 15 | 72254464  | 72254464  | G | T | G | K    | exonic     | ISLR     | missense | NM_005545:p.R71M      |
| 16989 | 15 | 72254465  | 72254465  | G | T | G | K    | exonic     | ISLR     | missense | NM_005545:p.R71S      |
| 16989 | 16 | 20236199  | 20236199  | C | G | C | S    | splicing   | GP2      | NA       | NA                    |
| 16989 | 16 | 56611586  | 56611586  | G | T | G | K    | exonic     | C16orf57 | missense | NM_001195302:p.R227L  |
| 16989 | 17 | 35135509  | 35135509  | A | T | A | W    | exonic     | ERBB2    | missense | NM_004448:p.T917S     |
| 16989 | 17 | 70355600  | 70355600  | A | T | A | W    | exonic     | GRIN2C   | missense | NM_000835:p.L586H     |
| 16989 | 18 | 27189035  | 27189035  | G | T | G | K    | exonic     | DSG1     | missense | NM_001942:p.G960C     |
| 16989 | 19 | 36459745  | 36459745  | G | C | G | S    | exonic     | TSHZ3    | missense | NM_020856:p.R932G     |
| 16989 | 19 | 63270950  | 63270950  | G | A | G | R    | exonic     | ZNF135   | missense | NM_007134:p.R453Q     |
| 16989 | 20 | 30268176  | 30268176  | G | T | G | K    | exonic     | POFUT1   | missense | NM_015352:p.W178L     |
| 16989 | 20 | 35097179  | 35097179  | C | A | C | M    | exonic     | RBL1     | missense | NM_183404:p.A684S     |
| 16989 | X  | 84249320  | 84249320  | C | G | C | S    | exonic     | SATL1    | missense | NM_001012980:p.W437C  |
| 16989 | X  | 101025754 | 101025754 | C | A | C | M    | exonic     | ZMAT1    | missense | NM_001011657:p.R434I  |
| 16989 | X  | 116917258 | 116917258 | G | A | G | R    | exonic     | KLHL13   | missense | NM_033495:p.L537F     |
| 16989 | M  | 3516      | 3516      | T | C | T | Y    | intergenic | NA       | NA       | NA                    |
| 17273 | 14 | 18184517  | 18184517  | T | C | T | Y    | intergenic | NA       | NA       | NA                    |
| 18472 | 1  | 11225925  | 11225925  | A | T | A | W    | exonic     | MTOR     | missense | NM_004958:p.D415E     |
| 18472 | 1  | 207865871 | 207865871 | C | T | C | Y    | exonic     | LAMB3    | missense | NM_000228:p.R574H     |
| 18472 | 1  | 239818721 | 239818721 | C | T | C | Y    | exonic     | KMO      | missense | NM_003679:p.A355V     |
| 18472 | 2  | 157992155 | 157992155 | A | G | A | R    | exonic     | CYTIP    | missense | NM_004288:p.M167T     |
| 18472 | 2  | 201839759 | 201839759 | G | T | G | K    | splicing   | CASP8    | missense | NM_001080124:p.R102M  |
| 18472 | 2  | 206732976 | 206732976 | G | A | G | R    | exonic     | EEF1B2   | missense | NM_001959:p.A10T      |
| 18472 | 2  | 220201467 | 220201467 | C | A | C | M    | exonic     | SLC4A3   | missense | NM_201574:p.L50I      |
| 18472 | 3  | 139665944 | 139665944 | G | A | G | R    | exonic     | ESYT3    | missense | NM_031913:p.R328Q     |
| 18472 | 3  | 198142180 | 198142180 | C | T | C | Y    | exonic     | SENP5    | missense | NM_152699:p.L753F     |
| 18472 | 4  | 75703705  | 75703705  | G | A | G | R    | exonic     | AREG     | missense | NM_001657:p.G157R     |
| 18472 | 4  | 124032931 | 124032931 | A | G | A | R    | exonic     | FGF2     | missense | NM_002006:p.Y266C     |
| 18472 | 5  | 148978715 | 148978715 | G | A | G | R    | exonic     | ARHGEF37 | missense | NM_001001669:p.D271N  |
| 18472 | 6  | 29697940  | 29697940  | G | A | G | R    | exonic     | GABBR1   | nonsense | NM_001470:p.R329X     |
| 18472 | 6  | 33396721  | 33396721  | C | T | C | Y    | exonic     | DAXX     | missense | NM_001141969:p.R270H  |
| 18472 | 7  | 149617558 | 149617558 | T | C | T | Y    | exonic     | ACTR3C   | missense | NM_001164458:p.I71V   |
| 18472 | 8  | 145062820 | 145062820 | C | T | C | Y    | exonic     | PLEC     | missense | NM_201384:p.R4386H    |
| 18472 | 9  | 115970958 | 115970958 | G | C | G | S    | exonic     | COL27A1  | missense | NM_032888:p.R434S     |
| 18472 | 9  | 133759164 | 133759164 | T | C | T | Y    | exonic     | MED27    | missense | NM_004269:p.M204V     |
| 18472 | 10 | 26546545  | 26546545  | C | T | C | Y    | splicing   | GAD2     | missense | NM_001134366:p.A26V   |
| 18472 | 10 | 27548715  | 27548715  | C | G | C | S    | exonic     | ACBD5    | missense | NM_145698:p.E190Q     |
| 18472 | 10 | 95316832  | 95316832  | G | A | G | R    | exonic     | GPR120   | missense | NM_001195755:p.G122D  |
| 18472 | 10 | 115354659 | 115354659 | C | T | C | Y    | exonic     | NRAP     | missense | NM_006175:p.R1274K    |
| 18472 | 11 | 6200327   | 6200327   | A | G | A | R    | exonic     | FAM160A2 | missense | NM_032127:p.L371P     |
| 18472 | 11 | 9726045   | 9726045   | G | A | G | R    | exonic     | SWAP70   | missense | NM_015055:p.A474T     |
| 18472 | 11 | 128286493 | 128286493 | C | T | C | Y    | exonic     | KCNJ5    | missense | NM_000890:p.R39C      |
| 18472 | 12 | 537121    | 537121    | G | A | G | R    | exonic     | B4GALNT3 | missense | NM_173593:p.V823I     |
| 18472 | 12 | 52001409  | 52001409  | G | - | C | */-G | exonic     | AAAS     | FS_del   | NM_015665:p.P36fs     |
| 18472 | 14 | 22896379  | 22896379  | C | A | C | M    | exonic     | EF5      | missense | NM_032459:p.G435C     |
| 18472 | 14 | 35193410  | 35193410  | C | T | C | Y    | exonic     | RALGAPA1 | missense | NM_194301:p.V1335I    |
| 18472 | 14 | 51575302  | 51575302  | G | T | G | K    | exonic     | NID2     | missense | NM_007361:p.L724M     |
| 18472 | 14 | 64475994  | 64475994  | G | A | G | R    | exonic     | GPX2     | missense | NM_002083:p.P180S     |
| 18472 | 16 | 30997347  | 30997347  | C | T | C | Y    | exonic     | ZNF646   | missense | NM_014699:p.S734F     |
| 18472 | 16 | 84512357  | 84512357  | T | - | A | */-T | exonic     | IRF8     | FS_del   | NM_002163:p.F417fs    |
| 18472 | 17 | 2516097   | 2516097   | A | - | G | */-A | exonic     | PAFAH1B1 | FS_del   | NM_000430:p.E52fs     |
| 18472 | 17 | 6439098   | 6439098   | C | T | C | Y    | splicing   | KIAA0753 | NA       | NA                    |
| 18472 | 17 | 7163125   | 7163125   | G | A | G | R    | exonic     | NEURL4   | missense | NM_001005408:p.R1216W |
| 18472 | 17 | 46452553  | 46452553  | T | C | T | Y    | exonic     | SPAG9    | missense | NM_001130528:p.M353V  |
| 18472 | 18 | 27947722  | 27947722  | T | C | T | Y    | exonic     | RNF138   | missense | NM_001191324:p.M135T  |
| 18472 | 19 | 1341996   | 1341996   | G | A | G | R    | exonic     | NDUF57   | missense | NM_024407:p.V119I     |
| 18472 | 19 | 10966645  | 10966645  | C | T | C | Y    | exonic     | SMARCA4  | missense | NM_001128845:p.R521W  |
| 18472 | 19 | 13087558  | 13087558  | G | A | G | R    | exonic     | TRMT1    | missense | NM_001142554:p.T112M  |
| 18472 | 19 | 14439427  | 14439427  | G | T | G | K    | exonic     | PKN1     | missense | NM_002741:p.Q594H     |
| 18472 | 19 | 61135459  | 61135459  | C | A | C | M    | exonic     | NLRP13   | missense | NM_176810:p.G11C      |
| 18472 | X  | 53619386  | 53619386  | T | C | T | Y    | exonic     | HUWE1    | missense | NM_031407:p.Y1991C    |
| 18472 | X  | 70741089  | 70741089  | A | G | A | R    | exonic     | ACRC     | missense | NM_052957:p.R413G     |
| 18472 | X  | 152607446 | 152607446 | G | A | G | R    | exonic     | SLC6A8   | missense | NM_001142805:p.V75M   |
| 18472 | X  | 152840026 | 152840026 | G | A | G | R    | exonic     | ARHGAP4  | missense | NM_001666:p.R141C     |
| 7285  | 1  | 1257126   | 1257126   | C | G | C | S    | exonic     | TAS1R3   | missense | NM_152228:p.S146W     |

|      |   |           |           |   |   |   |      |            |           |          |                       |
|------|---|-----------|-----------|---|---|---|------|------------|-----------|----------|-----------------------|
| 7285 | 1 | 115321750 | 115321750 | A | G | A | R    | exonic     | SYCP1     | missense | NM_003176:p.K791R     |
| 7285 | 1 | 152584147 | 152584147 | G | T | G | K    | exonic     | ATP8B2    | missense | NM_020452:p.R821L     |
| 7285 | 1 | 153849470 | 153849470 | A | G | A | R    | exonic     | MSTO1     | missense | NM_018116:p.T369A     |
| 7285 | 1 | 156847745 | 156847745 | G | T | G | K    | exonic     | SPTA1     | missense | NM_003126:p.P2398Q    |
| 7285 | 1 | 173571519 | 173571519 | C | A | C | M    | exonic     | TNR       | missense | NM_003285:p.W1194C    |
| 7285 | 1 | 184591427 | 184591427 | G | C | G | S    | exonic     | TPR       | nonsense | NM_003292:p.S662X     |
| 7285 | 1 | 198356676 | 198356676 | T | C | T | Y    | exonic     | NR5A2     | missense | NM_003822:p.C404R     |
| 7285 | 1 | 206300678 | 206300678 | G | T | G | K    | exonic     | PLXNA2    | missense | NM_025179:p.P905Q     |
| 7285 | 1 | 213842125 | 213842125 | A | T | A | W    | exonic     | KCTD3     | missense | NM_016121:p.D366V     |
| 7285 | 1 | 213914947 | 213914947 | C | A | C | M    | exonic     | USH2A     | missense | NM_206933:p.S4310I    |
| 7285 | 1 | 220986569 | 220986569 | C | A | C | M    | exonic     | FAM177B   | missense | NM_207468:p.T20N      |
| 7285 | 1 | 226313475 | 226313475 | T | C | T | Y    | exonic     | WNT3A     | missense | NM_033131:p.S249P     |
| 7285 | 1 | 227840348 | 227840348 | C | A | C | M    | exonic     | URB2      | missense | NM_014777:p.T1122K    |
| 7285 | 1 | 244877522 | 244877522 | G | T | G | K    | exonic     | CNST      | missense | NM_152609:p.D466Y     |
| 7285 | 1 | 246044826 | 246044826 | T | C | T | Y    | exonic     | OR14A16   | missense | NM_001001966:p.M277V  |
| 7285 | 1 | 246071059 | 246071059 | T | C | T | Y    | exonic     | OR11L1    | missense | NM_001001959:p.M255V  |
| 7285 | 1 | 246125938 | 246125938 | G | T | G | K    | exonic     | OR2W3     | missense | NM_001001957:p.G143C  |
| 7285 | 1 | 246503675 | 246503675 | T | C | T | Y    | exonic     | OR2T33    | missense | NM_001004695:p.H22R   |
| 7285 | 1 | 246752295 | 246752295 | C | A | C | M    | exonic     | OR2G6     | nonsense | NM_001013355:p.S242X  |
| 7285 | 2 | 26558817  | 26558817  | A | C | A | M    | exonic     | OTOF      | missense | NM_194248:p.F514V     |
| 7285 | 2 | 40509715  | 40509715  | C | T | C | Y    | exonic     | SLC8A1    | missense | NM_021097:p.D404N     |
| 7285 | 2 | 71631721  | 71631721  | A | G | A | R    | exonic     | DYSF      | missense | NM_001130979:p.Y553C  |
| 7285 | 2 | 74444039  | 74444039  | C | G | C | S    | exonic     | DCTN1     | missense | NM_001135040:p.G1054R |
| 7285 | 2 | 127897139 | 127897139 | C | A | C | M    | exonic     | PROC      | missense | NM_000312:p.H108N     |
| 7285 | 3 | 5224805   | 5224805   | A | G | A | R    | exonic     | EDEM1     | missense | NM_014674:p.I456V     |
| 7285 | 3 | 35745939  | 35745939  | C | T | C | Y    | exonic     | ARPP21    | nonsense | NM_016300:p.Q456X     |
| 7285 | 3 | 44907098  | 44907098  | G | C | G | S    | splicing   | TGM4      | NA       | NA                    |
| 7285 | 3 | 52833007  | 52833007  | G | - | C | */-G | exonic     | ITIH4     | FS_del   | NM_001166449:p.R409fs |
| 7285 | 3 | 57257392  | 57257392  | G | T | G | K    | exonic     | APPL1     | missense | NM_012096:p.R279L     |
| 7285 | 3 | 98189297  | 98189297  | G | C | G | S    | exonic     | EPHA6     | missense | NM_001080448:p.R295P  |
| 7285 | 3 | 99699598  | 99699598  | C | A | C | M    | exonic     | OR5K2     | missense | NM_001004737:p.N128K  |
| 7285 | 3 | 102430979 | 102430979 | C | A | C | M    | exonic     | IMPG2     | missense | NM_016247:p.V1190L    |
| 7285 | 3 | 109845994 | 109845994 | G | A | G | R    | exonic     | DZIP3     | missense | NM_014648:p.V479M     |
| 7285 | 3 | 114667252 | 114667252 | C | G | C | S    | exonic     | SPICE1    | missense | NM_144718:p.E409Q     |
| 7285 | 3 | 120615951 | 120615951 | G | C | G | S    | exonic     | ARHGAP31  | missense | NM_020754:p.E829Q     |
| 7285 | 3 | 120908398 | 120908398 | A | T | A | W    | exonic     | C3orf15   | missense | NM_033364:p.Q59H      |
| 7285 | 3 | 121386907 | 121386907 | T | G | T | K    | exonic     | GPR156    | missense | NM_153002:p.T209P     |
| 7285 | 3 | 148603203 | 148603203 | A | T | A | W    | splicing   | ZIC4      | NA       | NA                    |
| 7285 | 3 | 149942333 | 149942333 | G | A | G | R    | exonic     | AGTR1     | missense | NM_009585:p.C274Y     |
| 7285 | 3 | 171040658 | 171040658 | T | C | T | Y    | exonic     | LRRC31    | missense | NM_024727:p.S489G     |
| 7285 | 3 | 184974166 | 184974166 | T | G | T | K    | exonic     | YEATS2    | missense | NM_018023:p.L753W     |
| 7285 | 3 | 188053608 | 188053608 | C | G | C | S    | exonic     | ADIPOQ    | missense | NM_004797:p.Q23E      |
| 7285 | 4 | 46625351  | 46625351  | C | A | C | M    | exonic     | GABRA4    | missense | NM_000809:p.R438L     |
| 7285 | 4 | 85845613  | 85845613  | C | T | C | Y    | exonic     | WDFY3     | missense | NM_014991:p.A2765T    |
| 7285 | 4 | 102166197 | 102166197 | C | A | C | M    | exonic     | PPP3CA    | nonsense | NM_001130692:p.E420X  |
| 7285 | 4 | 134290881 | 134290881 | A | T | A | W    | exonic     | PCDH10    | missense | NM_032961:p.T465      |
| 7285 | 4 | 164612943 | 164612943 | G | T | G | K    | exonic     | TKTL2     | missense | NM_032136:p.A465D     |
| 7285 | 4 | 176134650 | 176134650 | T | C | T | Y    | exonic     | ADAM29    | missense | NM_014269:p.W467R     |
| 7285 | 4 | 190631357 | 190631357 | C | A | C | M    | ncRNA      | HSP90AA4P | NA       | NA                    |
| 7285 | 5 | 38517785  | 38517785  | T | A | T | W    | exonic     | LIFR      | missense | NM_002310:p.E988V     |
| 7285 | 5 | 128824050 | 128824050 | T | A | T | W    | exonic     | ADAMTS19  | missense | NM_133638:p.F17I      |
| 7285 | 5 | 129058349 | 129058349 | G | A | G | R    | exonic     | ADAMTS19  | missense | NM_133638:p.M946I     |
| 7285 | 5 | 140201589 | 140201589 | G | A | G | R    | exonic     | PCDH8     | missense | NM_018911:p.V167M     |
| 7285 | 5 | 140548473 | 140548473 | C | A | C | M    | exonic     | PCDH9     | missense | NM_019119:p.P466Q     |
| 7285 | 6 | 24775526  | 24775526  | G | T | G | K    | exonic     | ACOT13    | missense | NM_018473:p.R19L      |
| 7285 | 6 | 28647915  | 28647915  | C | A | C | M    | exonic     | SCAND3    | missense | NM_052923:p.A1244S    |
| 7285 | 6 | 28979947  | 28979947  | A | C | A | M    | exonic     | TRIM27    | missense | NM_006510:p.F474C     |
| 7285 | 6 | 29493875  | 29493875  | C | A | C | M    | intergenic | NA        | NA       | NA                    |
| 7285 | 6 | 32038804  | 32038804  | A | T | A | W    | exonic     | SKIV2L    | missense | NM_006929:p.S454C     |
| 7285 | 6 | 40467809  | 40467809  | C | A | C | M    | exonic     | LRFN2     | missense | NM_020737:p.G741C     |
| 7285 | 6 | 46982442  | 46982442  | C | A | C | M    | exonic     | GPR116    | missense | NM_015234:p.R6I       |
| 7285 | 6 | 50045267  | 50045267  | C | A | C | M    | exonic     | DEFB113   | missense | NM_001037729:p.V11F   |
| 7285 | 6 | 56612497  | 56612497  | C | A | C | M    | exonic     | DST       | missense | NM_001723:p.A348S     |
| 7285 | 6 | 69760513  | 69760513  | C | A | C | M    | exonic     | BAI3      | missense | NM_001704:p.L623M     |
| 7285 | 6 | 78229710  | 78229710  | T | C | T | Y    | exonic     | HTR1B     | missense | NM_000863:p.I44V      |
| 7285 | 6 | 90482175  | 90482175  | C | T | C | Y    | exonic     | MDN1      | missense | NM_014611:p.E2260K    |
| 7285 | 6 | 97783521  | 97783521  | C | T | C | Y    | exonic     | MMS22L    | missense | NM_198468:p.S670N     |
| 7285 | 6 | 116865076 | 116865076 | A | G | A | R    | exonic     | DSE       | missense | NM_001080976:p.M918V  |
| 7285 | 6 | 167512028 | 167512028 | C | T | C | Y    | intronic   | TCP10L2   | NA       | NA                    |
| 7285 | 6 | 167648917 | 167648917 | A | - | C | */-A | exonic     | UNC93A    | FS_del   | NM_018974:p.Q454fs    |
| 7285 | 7 | 71880437  | 71880437  | T | A | T | W    | exonic     | TYW1B     | missense | NM_001145440:p.N297I  |
| 7285 | 7 | 73306608  | 73306608  | C | A | C | M    | exonic     | RFC2      | missense | NM_002914:p.E14D      |
| 7285 | 7 | 81552033  | 81552033  | G | A | G | R    | exonic     | CACNA2D1  | nonsense | NM_000722:p.R216X     |
| 7285 | 7 | 86392909  | 86392909  | C | T | C | Y    | splicing   | KIAA1324L | NA       | NA                    |
| 7285 | 7 | 94857442  | 94857442  | T | C | T | Y    | exonic     | PON3      | missense | NM_000940:p.D54G      |
| 7285 | 7 | 106549671 | 106549671 | G | C | G | S    | exonic     | PRKAR2B   | missense | NM_002736:p.D128H     |
| 7285 | 7 | 120752769 | 120752769 | T | C | T | Y    | splicing   | WNT16     | missense | NM_016087:p.W22R      |
| 7285 | 7 | 124290699 | 124290699 | C | T | C | Y    | exonic     | POT1      | missense | NM_015450:p.D163N     |
| 7285 | 7 | 128274177 | 128274177 | G | A | G | R    | exonic     | FLNC      | missense | NM_001127487:p.G1424R |

|      |    |           |           |       |   |   |        |            |          |           |                        |
|------|----|-----------|-----------|-------|---|---|--------|------------|----------|-----------|------------------------|
| 7285 | 7  | 133230916 | 133230916 | G     | T | G | K      | exonic     | EXOC4    | missense  | NM_021807:p.V587F      |
| 7285 | 7  | 135056760 | 135056760 | C     | A | C | M      | exonic     | SLC13A4  | nonsense  | NM_012450:p.E51X       |
| 7285 | 8  | 39746172  | 39746172  | A     | T | A | W      | exonic     | ADAM2    | missense  | NM_001464:p.C370S      |
| 7285 | 8  | 69184231  | 69184231  | C     | G | C | S      | exonic     | PREX2    | missense  | NM_024870:p.Q989E      |
| 7285 | 8  | 69193377  | 69193377  | C     | A | C | M      | exonic     | PREX2    | missense  | NM_024870:p.T1122N     |
| 7285 | 8  | 75920032  | 75920032  | G     | A | G | R      | exonic     | PI15     | missense  | NM_015886:p.M169I      |
| 7285 | 8  | 82769362  | 82769362  | T     | A | T | W      | exonic     | SLC10A5  | missense  | NM_001010893:p.Q134L   |
| 7285 | 8  | 82769363  | 82769363  | G     | A | G | R      | exonic     | SLC10A5  | nonsense  | NM_001010893:p.Q134X   |
| 7285 | 8  | 87299119  | 87299119  | G     | A | G | R      | exonic     | SLC7A13  | missense  | NM_138817:p.P292L      |
| 7285 | 8  | 88954438  | 88954438  | G     | C | G | S      | exonic     | DCAF4L2  | missense  | NM_152418:p.T293S      |
| 7285 | 8  | 91051915  | 91051915  | C     | A | C | M      | exonic     | NBN      | missense  | NM_002485:p.R250M      |
| 7285 | 8  | 95333446  | 95333446  | C     | A | C | M      | exonic     | GBM      | missense  | NM_005261:p.R197L      |
| 7285 | 8  | 101089956 | 101089956 | G     | T | G | K      | exonic     | RG522    | nonsense  | NM_015668:p.Y728X      |
| 7285 | 8  | 105525652 | 105525652 | C     | A | C | M      | splicing   | DPYS     | missense  | NM_001385:p.G265W      |
| 7285 | 8  | 109039549 | 109039549 | G     | T | G | K      | exonic     | RSPO2    | missense  | NM_178565:p.T184K      |
| 7285 | 8  | 113336833 | 113336833 | C     | T | C | Y      | splicing   | CSMD3    | NA        | NA                     |
| 7285 | 8  | 113383314 | 113383314 | G     | C | G | S      | exonic     | CSMD3    | missense  | NM_052900:p.T2606S     |
| 7285 | 8  | 113747682 | 113747682 | C     | G | C | S      | splicing   | CSMD3    | missense  | NM_052900:p.R835T      |
| 7285 | 8  | 121308742 | 121308742 | A     | T | A | W      | exonic     | COL14A1  | missense  | NM_021110:p.S703C      |
| 7285 | 8  | 121362376 | 121362376 | A     | G | A | R      | exonic     | COL14A1  | missense  | NM_021110:p.K1241E     |
| 7285 | 8  | 139220475 | 139220475 | C     | A | C | M      | exonic     | FAM135B  | missense  | NM_015912:p.Q1279H     |
| 7285 | 9  | 3888663   | 3888663   | T     | A | T | W      | ncRNA      | C9orf70  | NA        | NA                     |
| 7285 | 9  | 27195004  | 27195025  | ATATT | - | C | */-    | exonic     | TEK      | FS_del    | NM_000459:p.769_776del |
| 7285 | 9  | 32620237  | 32620237  | C     | T | C | Y      | exonic     | TAF1L    | missense  | NM_153809:p.E1781K     |
| 7285 | 9  | 36664928  | 36664928  | A     | G | A | R      | exonic     | MELK     | missense  | NM_014791:p.Q591R      |
| 7285 | 9  | 73539568  | 73539568  | C     | T | C | Y      | exonic     | TMEM2    | missense  | NM_013390:p.C456Y      |
| 7285 | 9  | 79145215  | 79145215  | A     | C | A | M      | exonic     | VPS13A   | missense  | NM_033305:p.N2319H     |
| 7285 | 9  | 121015993 | 121015993 | A     | T | A | W      | intronic   | DBC1     | NA        | NA                     |
| 7285 | 9  | 122926127 | 122926127 | C     | G | C | S      | exonic     | CEP110   | missense  | NM_007018:p.S583C      |
| 7285 | 9  | 134885346 | 134885346 | G     | T | G | K      | intergenic | NA       | NA        | NA                     |
| 7285 | 9  | 138998989 | 138998989 | T     | C | T | Y      | exonic     | LCNL1    | missense  | NM_207510:p.M67T       |
| 7285 | 10 | 83461     | 83461     | G     | C | G | S      | exonic     | TUBB8    | missense  | NM_001164154:p.Q219E   |
| 7285 | 10 | 26829991  | 26829991  | C     | A | C | M      | exonic     | APBB1IP  | missense  | NM_019043:p.A133D      |
| 7285 | 10 | 29011068  | 29011068  | C     | T | C | Y      | exonic     | BAMBI    | missense  | NM_012342:p.A172V      |
| 7285 | 10 | 38383809  | 38383809  | G     | A | G | R      | exonic     | ZNF33A   | missense  | NM_006974:p.E250K      |
| 7285 | 10 | 42930047  | 42930047  | C     | T | C | Y      | exonic     | RET      | missense  | NM_020975:p.H665Y      |
| 7285 | 10 | 55625528  | 55625528  | G     | T | G | K      | exonic     | PCDH15   | missense  | NM_001142766:p.P409Q   |
| 7285 | 10 | 60232938  | 60232938  | G     | A | G | R      | exonic     | BICC1    | missense  | NM_001080512:p.R704K   |
| 7285 | 10 | 68196044  | 68196044  | G     | T | G | K      | exonic     | CTNNA3   | missense  | NM_001127384:p.T422N   |
| 7285 | 10 | 72170810  | 72170810  | G     | T | G | K      | exonic     | ADAMTS14 | nonsense  | NM_080722:p.E604X      |
| 7285 | 10 | 118414265 | 118414265 | T     | A | T | W      | exonic     | C10orf82 | missense  | NM_144661:p.E153V      |
| 7285 | 10 | 124047284 | 124047286 | TGA   | - | G | */-TGA | exonic     | BTBD16   | nonFS_del | NM_144587:p.201_202del |
| 7285 | 11 | 4826314   | 4826314   | C     | T | C | Y      | exonic     | OR511    | missense  | NM_001004758:p.G234D   |
| 7285 | 11 | 5485576   | 5485576   | G     | A | G | R      | exonic     | UBQLN3   | missense  | NM_017481:p.H597Y      |
| 7285 | 11 | 5523043   | 5523043   | C     | G | C | S      | exonic     | OR52H1   | missense  | NM_001005289:p.G96A    |
| 7285 | 11 | 5587985   | 5587985   | C     | A | C | M      | exonic     | TRIM6    | missense  | NM_001003819:p.L298I   |
| 7285 | 11 | 5835396   | 5835396   | A     | G | A | R      | exonic     | OR52E8   | missense  | NM_001005168:p.F38S    |
| 7285 | 11 | 20472303  | 20472303  | G     | - | C | */-G   | exonic     | PRMT3    | FS_del    | NM_001145166:p.T409fs  |
| 7285 | 11 | 28091661  | 28091661  | G     | C | G | S      | exonic     | METT5D1  | missense  | NM_001113528:p.M68I    |
| 7285 | 11 | 29990188  | 29990188  | G     | C | G | S      | exonic     | KCNA4    | missense  | NM_002233:p.P205R      |
| 7285 | 11 | 55079104  | 55079104  | G     | T | G | K      | exonic     | OR4C15   | missense  | NM_001001920:p.G249V   |
| 7285 | 11 | 55409699  | 55409699  | G     | T | G | K      | exonic     | SPRYD5   | missense  | NM_032681:p.M73I       |
| 7285 | 11 | 55438329  | 55438329  | C     | A | C | M      | exonic     | OR5W2    | missense  | NM_001001960:p.L102F   |
| 7285 | 11 | 55684185  | 55684185  | G     | C | G | S      | exonic     | OR8K5    | missense  | NM_001004058:p.S62C    |
| 7285 | 11 | 64320402  | 64320402  | C     | T | C | Y      | exonic     | MAP4K2   | missense  | NM_004579:p.G557D      |
| 7285 | 11 | 85113401  | 85113401  | T     | C | T | Y      | exonic     | SYTL2    | missense  | NM_206928:p.T583A      |
| 7285 | 11 | 120506029 | 120506029 | G     | A | G | R      | exonic     | TECTA    | missense  | NM_005422:p.G947E      |
| 7285 | 11 | 123405810 | 123405810 | A     | G | A | R      | exonic     | OR10G8   | missense  | NM_001004464:p.I91V    |
| 7285 | 12 | 1983837   | 1983837   | C     | T | C | Y      | exonic     | DCP1B    | missense  | NM_152640:p.G8S        |
| 7285 | 12 | 6334849   | 6334849   | C     | A | C | M      | exonic     | SCNN1A   | missense  | NM_001159576:p.M390I   |
| 7285 | 12 | 6334850   | 6334850   | A     | T | A | W      | exonic     | SCNN1A   | missense  | NM_001159576:p.M390K   |
| 7285 | 12 | 7872686   | 7872686   | G     | T | G | K      | exonic     | SLC2A14  | missense  | NM_153449:p.P209Q      |
| 7285 | 12 | 46820797  | 46820797  | T     | A | T | W      | exonic     | PFKM     | missense  | NM_000289:p.M406K      |
| 7285 | 12 | 47646379  | 47646379  | C     | A | C | M      | exonic     | WNT10B   | missense  | NM_003394:p.E312D      |
| 7285 | 12 | 48787646  | 48787646  | T     | A | T | W      | exonic     | GPDI     | nonsense  | NM_005276:p.C214X      |
| 7285 | 12 | 53810354  | 53810354  | A     | G | A | R      | exonic     | OR9K2    | missense  | NM_001005243:p.I179V   |
| 7285 | 12 | 71333185  | 71333185  | G     | T | G | K      | exonic     | TRHDE    | missense  | NM_013381:p.W944L      |
| 7285 | 12 | 79626056  | 79626056  | C     | T | C | Y      | exonic     | MYF6     | missense  | NM_002469:p.R143W      |
| 7285 | 12 | 89871754  | 89871754  | C     | A | C | M      | exonic     | C12orf12 | missense  | NM_152638:p.E299D      |
| 7285 | 12 | 94797563  | 94797563  | G     | A | G | R      | exonic     | CCDC38   | nonsense  | NM_182496:p.Q378X      |
| 7285 | 13 | 31643360  | 31643360  | A     | G | A | R      | exonic     | FRY      | missense  | NM_023037:p.T702A      |
| 7285 | 13 | 77090195  | 77090195  | C     | T | C | Y      | splicing   | SCEL     | nonsense  | NM_003843:p.R523X      |
| 7285 | 13 | 112820965 | 112820965 | T     | C | T | Y      | exonic     | F7       | missense  | NM_000131:p.L348P      |
| 7285 | 14 | 18184541  | 18184541  | G     | A | G | R      | intergenic | NA       | NA        | NA                     |
| 7285 | 14 | 73106248  | 73106248  | A     | T | A | W      | exonic     | ACOT2    | missense  | NM_006821:p.Q184L      |
| 7285 | 14 | 93664020  | 93664020  | C     | - | G | */-C   | exonic     | IFI27L2  | FS_del    | NM_032036:p.A88fs      |
| 7285 | 14 | 96412126  | 96412126  | A     | G | A | R      | exonic     | VRK1     | missense  | NM_003384:p.K359E      |
| 7285 | 15 | 19915231  | 19915231  | A     | T | A | W      | ncRNA      | OR4N3P   | NA        | NA                     |
| 7285 | 15 | 20418998  | 20418998  | A     | T | A | W      | exonic     | TUBGCP5  | missense  | NM_052903:p.Q878L      |



|      |    |           |           |   |   |   |      |            |           |          |                       |
|------|----|-----------|-----------|---|---|---|------|------------|-----------|----------|-----------------------|
| 7285 | 15 | 26129882  | 26129882  | T | A | T | W    | exonic     | HERC2     | missense | NM_004667:p.Q2310H    |
| 7285 | 15 | 27154497  | 27154497  | G | A | G | R    | splicing   | APBA2     | NA       | NA                    |
| 7285 | 15 | 39647727  | 39647727  | A | G | A | R    | exonic     | TYRO3     | missense | NM_006293:p.N328D     |
| 7285 | 15 | 40243156  | 40243156  | T | C | T | Y    | exonic     | VPS39     | missense | NM_015289:p.I697V     |
| 7285 | 15 | 43484858  | 43484858  | G | C | G | S    | exonic     | SPATA5L1  | missense | NM_024063:p.V380L     |
| 7285 | 15 | 46835974  | 46835974  | T | C | T | Y    | exonic     | CEP152    | missense | NM_014985:p.I921M     |
| 7285 | 15 | 66791007  | 66791007  | A | T | A | W    | exonic     | CORO2B    | missense | NM_001190457:p.M181L  |
| 7285 | 15 | 84112403  | 84112403  | C | G | C | S    | exonic     | KLHL25    | missense | NM_022480:p.G548A     |
| 7285 | 15 | 88785849  | 88785849  | C | G | C | S    | exonic     | IQGAP1    | missense | NM_003870:p.P253A     |
| 7285 | 15 | 90774346  | 90774346  | G | T | G | K    | splicing   | ST8SIA2   | NA       | NA                    |
| 7285 | 16 | 3004012   | 3004012   | C | A | C | M    | exonic     | CLDN9     | nonsense | NM_020982:p.Y216X     |
| 7285 | 16 | 9765091   | 9765091   | A | C | A | M    | exonic     | GRIN2A    | missense | NM_001134407:p.W1271G |
| 7285 | 16 | 13927978  | 13927978  | C | T | C | Y    | exonic     | ERCC4     | missense | NM_005236:p.R150C     |
| 7285 | 16 | 20330330  | 20330330  | T | C | T | Y    | exonic     | ACSM5     | missense | NM_017888:p.L8P       |
| 7285 | 16 | 49731751  | 49731751  | C | A | C | M    | exonic     | SALL1     | missense | NM_001127892:p.G531V  |
| 7285 | 16 | 54994435  | 54994435  | T | A | T | W    | exonic     | AMFR      | nonsense | NM_0011444:p.K313X    |
| 7285 | 16 | 57133655  | 57133655  | G | A | G | R    | exonic     | CNOT1     | missense | NM_016284:p.P1554L    |
| 7285 | 16 | 75950732  | 75950732  | G | T | G | K    | exonic     | ADAMTS18  | missense | NM_199355:p.H436N     |
| 7285 | 16 | 87399541  | 87399541  | G | T | G | K    | exonic     | CDT1      | missense | NM_030928:p.M227I     |
| 7285 | 17 | 7520443   | 7520443   | A | - | G | */-A | exonic     | TP53      | FS_del   | NM_001126113:p.L26fs  |
| 7285 | 17 | 8107152   | 8107152   | G | T | G | K    | splicing   | PFAS      | missense | NM_012393:p.V471L     |
| 7285 | 17 | 10342693  | 10342693  | G | A | G | R    | exonic     | MYH1      | missense | NM_005963:p.R1386C    |
| 7285 | 17 | 50439923  | 50439923  | C | T | C | Y    | exonic     | STXBPA    | missense | NM_178509:p.P211L     |
| 7285 | 17 | 53924943  | 53924943  | G | A | G | R    | exonic     | MTMR4     | missense | NM_004687:p.P1113L    |
| 7285 | 17 | 78383528  | 78383528  | G | T | G | K    | exonic     | ZNF750    | missense | NM_024702:p.P31H      |
| 7285 | 18 | 336550    | 336550    | G | A | G | R    | exonic     | COLEC12   | missense | NM_130386:p.R358W     |
| 7285 | 18 | 35168979  | 35168979  | A | G | A | R    | ncRNA      | LOC647946 | NA       | NA                    |
| 7285 | 18 | 46829184  | 46829184  | G | T | G | K    | exonic     | SMAD4     | missense | NM_005359:p.C127F     |
| 7285 | 18 | 48846516  | 48846516  | C | A | C | M    | exonic     | DCC       | missense | NM_005215:p.L415I     |
| 7285 | 19 | 13854704  | 13854704  | T | C | T | Y    | exonic     | C19orf57  | missense | NM_024323:p.T609A     |
| 7285 | 19 | 21350562  | 21350562  | A | T | A | W    | ncRNA      | ZNF738    | NA       | NA                    |
| 7285 | 19 | 21702622  | 21702622  | G | A | G | R    | exonic     | ZNF100    | missense | NM_173531:p.S111F     |
| 7285 | 19 | 22155869  | 22155869  | T | C | T | Y    | exonic     | ZNF676    | missense | NM_001001411:p.T164A  |
| 7285 | 19 | 22951726  | 22951726  | G | A | G | R    | intergenic | NA        | NA       | NA                    |
| 7285 | 19 | 57579861  | 57579861  | C | A | C | M    | exonic     | ZNF880    | missense | NM_001145434:p.Q406K  |
| 7285 | 19 | 57749605  | 57749605  | A | G | A | R    | exonic     | ZNF808    | missense | NM_001039886:p.T542A  |
| 7285 | 19 | 62750248  | 62750248  | G | C | G | S    | exonic     | ZNF550    | missense | NM_001039654:p.I351M  |
| 7285 | 20 | 338561    | 338561    | C | T | C | Y    | exonic     | RBCK1     | missense | NM_031229:p.A20V      |
| 7285 | 20 | 1480450   | 1480450   | C | A | C | M    | exonic     | SIRPD     | missense | NM_178460:p.R103L     |
| 7285 | 20 | 9337715   | 9337715   | G | C | G | S    | exonic     | PLCB4     | missense | NM_182797:p.R617P     |
| 7285 | 20 | 13715997  | 13715997  | A | T | A | W    | splicing   | C20orf7   | nonsense | NM_024120:p.R88X      |
| 7285 | 20 | 21635111  | 21635111  | G | C | G | S    | exonic     | PAX1      | missense | NM_006192:p.V108L     |
| 7285 | 20 | 30019907  | 30019907  | T | C | T | Y    | exonic     | XKR7      | missense | NM_001011718:p.F90L   |
| 7285 | 20 | 31137538  | 31137538  | T | C | T | Y    | exonic     | C20orf186 | missense | NM_182519:p.V278A     |
| 7285 | 20 | 47045773  | 47045773  | C | G | C | S    | exonic     | ARFGEF2   | missense | NM_006420:p.F1056L    |
| 7285 | 20 | 49566879  | 49566879  | G | T | G | K    | exonic     | NFATC2    | missense | NM_001136021:p.P375T  |
| 7285 | 21 | 9966651   | 9966651   | G | T | G | K    | exonic     | TPTE      | missense | NM_199260:p.Q114K     |
| 7285 | 22 | 30918958  | 30918958  | G | T | G | K    | exonic     | RFPL2     | missense | NM_006605:p.H102N     |
| 7285 | 22 | 41988706  | 41988706  | C | T | C | Y    | exonic     | SCUBE1    | missense | NM_173050:p.G192S     |
| 7285 | 22 | 49268058  | 49268058  | A | G | R | R    | exonic     | ADM2      | missense | NM_024866:p.A103T     |
| 7285 | 22 | 49411471  | 49411471  | A | - | G | */-A | exonic     | ARSA      | FS_del   | NM_001085427:p.F319fs |
| 7285 | X  | 7849828   | 7849828   | C | A | C | M    | exonic     | PNPLA4    | missense | NM_001172672:p.V26L   |
| 7285 | X  | 18129924  | 18129924  | G | T | G | K    | exonic     | BEND2     | missense | NM_153346:p.P322Q     |
| 7285 | X  | 31406370  | 31406370  | A | G | A | R    | exonic     | DMD       | missense | NM_004020:p.L444P     |
| 7285 | X  | 106072678 | 106072678 | C | T | C | Y    | exonic     | MORC4     | missense | NM_001085354:p.G700D  |
| 7285 | X  | 109581237 | 109581237 | C | A | C | M    | exonic     | RGAG1     | missense | NM_020769:p.L246I     |
| 7285 | X  | 118855966 | 118855966 | C | A | C | M    | exonic     | UPF3B     | nonsense | NM_023010:p.E349X     |
| 7285 | X  | 150520694 | 150520694 | G | T | G | K    | exonic     | PASD1     | missense | NM_173493:p.G5W       |
| 7285 | X  | 150663306 | 150663306 | G | A | G | R    | exonic     | CNGA2     | missense | NM_005140:p.A559T     |
| 7313 | 1  | 16598463  | 16598463  | G | T | G | K    | exonic     | SPATA21   | missense | NM_198546:p.R439S     |
| 7313 | 1  | 17221745  | 17221745  | G | A | G | R    | exonic     | SDHB      | missense | NM_003000:p.P237L     |
| 7313 | 1  | 19396789  | 19396789  | C | A | C | M    | exonic     | UBR4      | missense | NM_020765:p.M285I     |
| 7313 | 1  | 20886650  | 20886650  | C | G | C | S    | exonic     | KIF17     | missense | NM_001122819:p.A586P  |
| 7313 | 1  | 35977688  | 35977688  | G | A | G | R    | exonic     | CLSPN     | missense | NM_001190481:p.A994V  |
| 7313 | 1  | 70224525  | 70224525  | T | A | T | W    | exonic     | LRRC7     | missense | NM_020794:p.L229I     |
| 7313 | 1  | 85179260  | 85179260  | G | C | G | S    | exonic     | MCOLN2    | missense | NM_153259:p.Q284E     |
| 7313 | 1  | 103152551 | 103152551 | T | A | T | W    | splicing   | COL11A1   | NA       | NA                    |
| 7313 | 1  | 111240846 | 111240846 | C | T | C | Y    | exonic     | CD53      | missense | NM_000560:p.P158S     |
| 7313 | 1  | 148397755 | 148397755 | G | A | G | R    | exonic     | PLEKH01   | missense | NM_016274:p.V215M     |
| 7313 | 1  | 154104595 | 154104595 | G | C | G | S    | exonic     | SYT11     | missense | NM_152280:p.G84R      |
| 7313 | 1  | 157078677 | 157078677 | C | T | C | Y    | exonic     | MNDA      | missense | NM_002432:p.T37I      |
| 7313 | 1  | 159762700 | 159762700 | C | A | C | M    | exonic     | HSPA6     | nonsense | NM_002155:p.S543X     |
| 7313 | 1  | 163780453 | 163780453 | G | T | G | K    | exonic     | LRRCS2    | missense | NM_001005214:p.G99V   |
| 7313 | 1  | 167612560 | 167612560 | C | T | C | Y    | exonic     | BLZF1     | missense | NM_003666:p.L63F      |
| 7313 | 1  | 174316912 | 174316912 | T | C | T | Y    | splicing   | RFWD2     | missense | NM_022457:p.S426G     |
| 7313 | 1  | 177321625 | 177321625 | C | T | C | Y    | exonic     | TOR3A     | missense | NM_022371:p.H205Y     |
| 7313 | 1  | 195288387 | 195288387 | C | G | C | S    | splicing   | F13B      | missense | NM_001994:p.E519Q     |
| 7313 | 1  | 215859949 | 215859949 | T | G | T | K    | exonic     | GPATCH2   | missense | NM_018040:p.Q191P     |
| 7313 | 1  | 226945979 | 226945979 | G | A | G | R    | exonic     | RHOA      | missense | NM_021205:p.D216N     |

|      |   |           |           |   |   |   |      |            |          |          |                       |
|------|---|-----------|-----------|---|---|---|------|------------|----------|----------|-----------------------|
| 7313 | 1 | 229473156 | 229473156 | G | T | G | K    | exonic     | GNPAT    | missense | NM_014236:p.A4375     |
| 7313 | 1 | 232666292 | 232666292 | T | A | T | W    | exonic     | TARBP1   | missense | NM_005646:p.Q438L     |
| 7313 | 1 | 241802912 | 241802912 | G | T | G | K    | exonic     | AKT3     | missense | NM_005465:p.A253E     |
| 7313 | 1 | 246410259 | 246410259 | G | C | G | S    | exonic     | OR2M2    | missense | NM_001004688:p.V117L  |
| 7313 | 2 | 26267721  | 26267721  | G | A | G | R    | exonic     | HADHA    | missense | NM_000182:p.R732W     |
| 7313 | 2 | 37159879  | 37159879  | G | C | G | S    | exonic     | HEATR5B  | missense | NM_019024:p.L76V      |
| 7313 | 2 | 79238974  | 79238974  | G | C | G | S    | exonic     | REG3A    | missense | NM_138938:p.H107D     |
| 7313 | 2 | 86197773  | 86197773  | A | G | A | R    | exonic     | PTCD3    | missense | NM_017952:p.I132V     |
| 7313 | 2 | 132085614 | 132085614 | G | T | G | K    | ncRNA      | POTEKP   | NA       | NA                    |
| 7313 | 2 | 135333373 | 135333373 | C | A | C | M    | exonic     | ACMSD    | missense | NM_138326:p.R59S      |
| 7313 | 2 | 136281421 | 136281421 | C | A | C | M    | exonic     | LCT      | missense | NM_002299:p.G1307V    |
| 7313 | 2 | 141468136 | 141468136 | C | A | C | M    | exonic     | LRP1B    | nonsense | NM_018557:p.G848X     |
| 7313 | 2 | 153283551 | 153283551 | G | C | G | S    | exonic     | ARL6IP6  | missense | NM_152522:p.R56P      |
| 7313 | 2 | 159820980 | 159820980 | C | G | C | S    | exonic     | WDSUB1   | missense | NM_001128213:p.E369Q  |
| 7313 | 2 | 159822617 | 159822617 | C | G | C | S    | exonic     | WDSUB1   | missense | NM_001128213:p.V284L  |
| 7313 | 2 | 175691002 | 175691002 | G | A | G | R    | exonic     | ATF2     | missense | NM_001880:p.P137S     |
| 7313 | 2 | 177807179 | 177807179 | C | G | C | S    | exonic     | NFE2L2   | missense | NM_001145412:p.D22H   |
| 7313 | 2 | 185509270 | 185509270 | G | T | G | K    | exonic     | ZNF804A  | missense | NM_194250:p.S301I     |
| 7313 | 2 | 241714553 | 241714553 | C | A | C | M    | exonic     | PASK     | missense | NM_015148:p.C817F     |
| 7313 | 3 | 9940689   | 9940689   | G | A | G | R    | exonic     | IL17RC   | missense | NM_032732:p.H234Q     |
| 7313 | 3 | 38735180  | 38735180  | C | A | C | M    | exonic     | SCN10A   | missense | NM_006514:p.A1217S    |
| 7313 | 3 | 86015129  | 86015129  | A | T | A | W    | splicing   | CADM2    | NA       | NA                    |
| 7313 | 3 | 95075874  | 95075874  | C | A | C | M    | exonic     | PROS1    | missense | NM_000313:p.G646C     |
| 7313 | 3 | 95216660  | 95216660  | C | G | C | S    | exonic     | STX19    | missense | NM_001001850:p.E48D   |
| 7313 | 3 | 109958594 | 109958594 | A | G | A | R    | splicing   | RETNLB   | NA       | NA                    |
| 7313 | 3 | 110305434 | 110305434 | C | A | C | M    | exonic     | MORC1    | missense | NM_014429:p.G59W      |
| 7313 | 3 | 120130116 | 120130116 | G | C | G | S    | exonic     | IGSF11   | nonsense | NM_152538:p.Y117X     |
| 7313 | 3 | 122583057 | 122583057 | G | A | G | R    | exonic     | STXBPSL  | missense | NM_014980:p.V883I     |
| 7313 | 3 | 125692946 | 125692946 | T | A | T | W    | exonic     | KALRN    | missense | NM_001024660:p.N1556K |
| 7313 | 3 | 130730373 | 130730373 | A | T | A | W    | exonic     | RHO      | missense | NM_000539:p.Q36L      |
| 7313 | 3 | 152555605 | 152555605 | A | T | A | W    | exonic     | MED12L   | missense | NM_053002:p.D767V     |
| 7313 | 3 | 166182882 | 166182882 | G | T | G | K    | exonic     | SI       | missense | NM_001041:p.T1753K    |
| 7313 | 3 | 180824488 | 180824488 | T | A | T | W    | exonic     | NDUF5    | missense | NM_001199957:p.I127N  |
| 7313 | 3 | 187918160 | 187918160 | C | A | C | M    | exonic     | KNG1     | missense | NM_000893:p.N45K      |
| 7313 | 4 | 48741575  | 48741575  | G | T | G | K    | exonic     | CWH43    | missense | NM_025087:p.D607Y     |
| 7313 | 4 | 72850093  | 72850093  | C | A | C | M    | exonic     | GC       | missense | NM_000583:p.Q131H     |
| 7313 | 4 | 77879581  | 77879581  | C | T | C | Y    | exonic     | SHROOM3  | missense | NM_020859:p.R411W     |
| 7313 | 4 | 111759101 | 111759101 | G | T | G | K    | exonic     | PITX2    | missense | NM_000325:p.P202T     |
| 7313 | 4 | 116217169 | 116217169 | C | A | C | M    | exonic     | NDST4    | missense | NM_022569:p.S158I     |
| 7313 | 4 | 123328052 | 123328052 | G | T | G | K    | exonic     | KIAA1109 | nonsense | NM_015312:p.E188X     |
| 7313 | 4 | 155726590 | 155726590 | C | A | C | M    | exonic     | FGA      | nonsense | NM_000508:p.E481X     |
| 7313 | 4 | 156354606 | 156354606 | A | G | A | R    | exonic     | NPY2R    | missense | NM_000910:p.Y22C      |
| 7313 | 5 | 3652403   | 3652403   | C | G | C | S    | exonic     | IRX1     | missense | NM_024337:p.A114G     |
| 7313 | 5 | 19874647  | 19874647  | G | C | G | S    | exonic     | CDH18    | missense | NM_001167667:p.P69R   |
| 7313 | 5 | 21819255  | 21819255  | C | A | C | M    | exonic     | CDH12    | missense | NM_004061:p.Q454H     |
| 7313 | 5 | 35809811  | 35809811  | G | T | G | K    | exonic     | SPEF2    | nonsense | NM_024867:p.E1337X    |
| 7313 | 5 | 45302989  | 45302989  | C | A | C | M    | exonic     | HCN1     | missense | NM_021072:p.R581I     |
| 7313 | 5 | 50147087  | 50147087  | C | T | C | Y    | exonic     | PARP8    | missense | NM_001178056:p.A547V  |
| 7313 | 5 | 63292794  | 63292794  | G | C | G | S    | exonic     | HTR1A    | missense | NM_000524:p.P170R     |
| 7313 | 5 | 112427765 | 112427765 | T | C | T | Y    | splicing   | MCC      | NA       | NA                    |
| 7313 | 5 | 131979679 | 131979679 | - | T | A | */+T | exonic     | RAD50    | FS_ins   | NM_005732:p.H1041fs   |
| 7313 | 5 | 175950038 | 175950038 | C | G | C | S    | exonic     | CDHR2    | missense | NM_001171976:p.I1120M |
| 7313 | 6 | 24594282  | 24594282  | C | T | C | Y    | splicing   | GPLD1    | silent   | NM_001503:p.E51E      |
| 7313 | 6 | 28580099  | 28580099  | G | C | G | S    | exonic     | GPX6     | missense | NM_182701:p.S205R     |
| 7313 | 6 | 70120888  | 70120888  | C | A | C | M    | exonic     | BAL3     | missense | NM_001704:p.P1168T    |
| 7313 | 6 | 76717483  | 76717483  | G | A | G | R    | exonic     | IMPG1    | missense | NM_001563:p.A447V     |
| 7313 | 6 | 99924304  | 99924304  | C | A | C | M    | exonic     | COQ3     | missense | NM_017421:p.V335F     |
| 7313 | 6 | 106642943 | 106642943 | G | T | G | K    | exonic     | PRDM1    | missense | NM_001198:p.G73C      |
| 7313 | 6 | 134345445 | 134345445 | G | T | G | K    | exonic     | TBPL1    | missense | NM_004865:p.W61L      |
| 7313 | 6 | 151831438 | 151831438 | A | T | A | W    | exonic     | C6orf211 | missense | NM_024573:p.T276S     |
| 7313 | 6 | 152782416 | 152782416 | A | T | A | W    | exonic     | SYNE1    | missense | NM_182961:p.V1801E    |
| 7313 | 7 | 23315572  | 23315572  | G | T | G | K    | exonic     | C7orf30  | missense | NM_138446:p.R197L     |
| 7313 | 7 | 38398016  | 38398016  | C | A | C | M    | exonic     | AMPH     | missense | NM_139316:p.S537I     |
| 7313 | 7 | 63805342  | 63805342  | G | T | G | K    | exonic     | ZNF107   | nonsense | NM_016220:p.E409X     |
| 7313 | 7 | 80128362  | 80128362  | A | T | A | W    | exonic     | CD36     | missense | NM_000072:p.N110I     |
| 7313 | 7 | 88803465  | 88803465  | C | G | C | S    | exonic     | ZNF804B  | missense | NM_181646:p.P1078R    |
| 7313 | 7 | 92823159  | 92823159  | G | T | G | K    | exonic     | CCDC132  | missense | NM_017667:p.C869F     |
| 7313 | 7 | 95004926  | 95004926  | C | G | C | S    | exonic     | ASB4     | missense | NM_016116:p.C400W     |
| 7313 | 7 | 99809207  | 99809207  | A | G | A | R    | UTR5       | PILRA    | NA       | NA                    |
| 7313 | 7 | 107204213 | 107204213 | C | T | C | Y    | exonic     | SLC26A3  | missense | NM_000111:p.E533K     |
| 7313 | 7 | 110550783 | 110550783 | G | T | G | K    | exonic     | LRRN3    | missense | NM_001099660:p.S240I  |
| 7313 | 7 | 111883293 | 111883293 | G | T | G | K    | splicing   | IFRD1    | missense | NM_001550:p.G67V      |
| 7313 | 7 | 124191326 | 124191326 | C | A | C | M    | exonic     | GPR37    | missense | NM_005302:p.C314F     |
| 7313 | 7 | 125960819 | 125960819 | C | A | C | M    | exonic     | GRM8     | missense | NM_001127323:p.G618V  |
| 7313 | 7 | 136822907 | 136822907 | G | T | G | K    | exonic     | DGKI     | missense | NM_004717:p.R791S     |
| 7313 | 7 | 137451937 | 137451937 | G | T | G | K    | exonic     | AKR1D1   | missense | NM_001190906:p.D283Y  |
| 7313 | 7 | 139694936 | 139694936 | G | A | G | R    | exonic     | SLC37A3  | missense | NM_032295:p.A328V     |
| 7313 | 7 | 142170796 | 142170796 | T | C | T | Y    | intergenic | NA       | NA       | NA                    |
| 7313 | 7 | 151658629 | 151658629 | C | - | G | */-C | exonic     | MLL3     | FS_del   | NM_170606:p.A127fs    |

|      |    |           |           |   |   |   |      |            |           |          |                       |
|------|----|-----------|-----------|---|---|---|------|------------|-----------|----------|-----------------------|
| 7313 | 8  | 8271840   | 8271840   | C | - | A | *-/C | exonic     | SGK223    | FS_del   | NM_001080826:p.V497fs |
| 7313 | 8  | 16022442  | 16022442  | C | A | C | M    | exonic     | MSR1      | nonsense | NM_138715:p.E360X     |
| 7313 | 8  | 27665969  | 27665969  | C | T | C | Y    | exonic     | CCDC25    | missense | NM_018246:p.V75M      |
| 7313 | 8  | 68340991  | 68340991  | C | A | C | M    | exonic     | ARFGEF1   | nonsense | NM_006421:p.E643X     |
| 7313 | 8  | 69174558  | 69174558  | C | G | C | S    | exonic     | PREX2     | missense | NM_024870:p.L881V     |
| 7313 | 8  | 93068375  | 93068375  | C | A | C | M    | splicing   | RUNX1T1   | silent   | NM_001198679:p.G390G  |
| 7313 | 9  | 38517586  | 38517586  | C | T | C | Y    | intergenic | NA        | NA       | NA                    |
| 7313 | 9  | 73550195  | 73550195  | G | C | G | S    | exonic     | TMEM2     | missense | NM_001135820:p.S198C  |
| 7313 | 9  | 94217469  | 94217469  | A | T | A | W    | exonic     | OMD       | missense | NM_005014:p.F351Y     |
| 7313 | 9  | 113449301 | 113449301 | C | T | C | Y    | exonic     | DNAJC25   | missense | NM_001015882:p.P144S  |
| 7313 | 10 | 393838    | 393838    | G | A | G | R    | exonic     | DIP2C     | missense | NM_014974:p.S945F     |
| 7313 | 10 | 14612398  | 14612398  | G | C | G | S    | exonic     | FAM107B   | missense | NM_031453:p.P198A     |
| 7313 | 10 | 27742416  | 27742416  | C | T | C | Y    | exonic     | PTCHD3    | missense | NM_001034842:p.R257K  |
| 7313 | 10 | 42612299  | 42612299  | A | G | A | R    | exonic     | BMS1      | missense | NM_014753:p.E534G     |
| 7313 | 10 | 102728963 | 102728963 | G | A | G | R    | exonic     | SEMA4G    | missense | NM_017893:p.A310T     |
| 7313 | 10 | 108327262 | 108327262 | G | C | G | S    | exonic     | SORCS1    | missense | NM_052918:p.P1138R    |
| 7313 | 10 | 115794267 | 115794267 | T | C | T | Y    | exonic     | ADRB1     | missense | NM_000684:p.F129S     |
| 7313 | 11 | 393681    | 393681    | - | G | C | */+G | exonic     | PKP3      | FS_ins   | NM_007183:p.R663fs    |
| 7313 | 11 | 1263862   | 1263862   | C | T | C | Y    | exonic     | TOLLIP    | missense | NM_019009:p.V186M     |
| 7313 | 11 | 4826819   | 4826819   | G | A | G | R    | exonic     | OR51S1    | missense | NM_001004758:p.P66S   |
| 7313 | 11 | 6772876   | 6772876   | C | A | C | M    | exonic     | OR6A2     | missense | NM_003696:p.G214W     |
| 7313 | 11 | 18209665  | 18209665  | G | A | G | R    | exonic     | SAA2-SAA4 | missense | NM_001199744:p.P196L  |
| 7313 | 11 | 40094292  | 40094292  | G | C | G | S    | exonic     | LRRC4C    | missense | NM_020929:p.R43G      |
| 7313 | 11 | 55647079  | 55647079  | G | A | G | R    | exonic     | OR8H3     | missense | NM_001005201:p.V219M  |
| 7313 | 11 | 55986861  | 55986861  | A | G | A | R    | exonic     | OR5M9     | missense | NM_001004743:p.L198T  |
| 7313 | 11 | 58233865  | 58233865  | G | T | G | K    | exonic     | GLYAT     | missense | NM_201648:p.H281N     |
| 7313 | 11 | 58946080  | 58946080  | C | T | C | Y    | exonic     | OR5A2     | missense | NM_001001954:p.R308K  |
| 7313 | 11 | 64581430  | 64581430  | G | A | G | R    | exonic     | NAALADL1  | missense | NM_005468:p.R198C     |
| 7313 | 11 | 65407278  | 65407278  | T | A | T | W    | exonic     | CTSW      | missense | NM_001335:p.V276E     |
| 7313 | 11 | 75580364  | 75580364  | T | C | T | Y    | exonic     | WNT11     | missense | NM_004626:p.K261R     |
| 7313 | 11 | 103413013 | 103413013 | C | A | C | M    | exonic     | DDI1      | missense | NM_001001711:p.P85T   |
| 7313 | 11 | 122353797 | 122353797 | A | G | A | R    | exonic     | BSX       | missense | NM_001098169:p.F158L  |
| 7313 | 11 | 123319221 | 123319221 | G | T | G | K    | exonic     | OR6T1     | missense | NM_001005187:p.R179S  |
| 7313 | 11 | 129307205 | 129307205 | A | T | A | W    | splicing   | PRDM10    | NA       | NA                    |
| 7313 | 12 | 841543    | 841543    | C | T | C | Y    | exonic     | WNK1      | missense | NM_018979:p.S662F     |
| 7313 | 12 | 864919    | 864919    | A | T | A | W    | exonic     | WNK1      | missense | NM_018979:p.Q1563L    |
| 7313 | 12 | 6089903   | 6089903   | C | T | C | Y    | exonic     | VWF       | missense | NM_000552:p.G144S     |
| 7313 | 12 | 20677893  | 20677893  | G | T | G | K    | splicing   | PDE3A     | NA       | NA                    |
| 7313 | 12 | 37984960  | 37984960  | C | A | C | M    | exonic     | KIF21A    | missense | NM_017641:p.C1484F    |
| 7313 | 12 | 54149865  | 54149865  | C | A | C | M    | exonic     | OR6C70    | nonsense | NM_001005499:p.E109X  |
| 7313 | 12 | 61240537  | 61240537  | G | T | G | K    | splicing   | MON2      | NA       | NA                    |
| 7313 | 12 | 74023956  | 74023956  | T | A | T | W    | exonic     | GLIPR1L1  | missense | NM_152779:p.C131S     |
| 7313 | 13 | 51446909  | 51446909  | C | G | C | S    | exonic     | ATP7B     | missense | NM_000053:p.E150Q     |
| 7313 | 13 | 66103383  | 66103383  | G | T | G | K    | exonic     | PCDH9     | missense | NM_203487:p.D1100E    |
| 7313 | 13 | 93478057  | 93478057  | C | A | C | M    | exonic     | GPC6      | missense | NM_005708:p.T262N     |
| 7313 | 14 | 19458885  | 19458885  | T | A | T | W    | exonic     | OR4K5     | missense | NM_001005483:p.F94I   |
| 7313 | 14 | 20094643  | 20094643  | A | T | A | W    | exonic     | RNASE9    | nonsense | NM_001110358:p.C147X  |
| 7313 | 14 | 23642247  | 23642247  | G | T | G | K    | exonic     | PKC2      | missense | NM_004563:p.G471W     |
| 7313 | 14 | 33332994  | 33332994  | C | A | C | M    | exonic     | NPAS3     | missense | NM_173159:p.L419I     |
| 7313 | 14 | 63263761  | 63263761  | T | C | T | Y    | exonic     | SGPP1     | missense | NM_030791:p.M219V     |
| 7313 | 14 | 91970046  | 91970046  | G | T | G | K    | exonic     | SLC24A4   | missense | NM_153647:p.K93N      |
| 7313 | 14 | 92751070  | 92751070  | T | G | T | K    | exonic     | UBR7      | missense | NM_175748:p.F162V     |
| 7313 | 14 | 104684768 | 104684768 | C | G | C | S    | exonic     | JAG2      | missense | NM_002226:p.G807R     |
| 7313 | 15 | 21362782  | 21362782  | C | A | C | S    | exonic     | MKRN3     | missense | NM_005664:p.R254G     |
| 7313 | 15 | 32142850  | 32142850  | T | A | T | W    | exonic     | CHRM5     | missense | NM_012125:p.C214S     |
| 7313 | 15 | 32232467  | 32232467  | C | G | C | S    | exonic     | C15orf29  | missense | NM_024713:p.R85T      |
| 7313 | 15 | 41854003  | 41854003  | C | G | C | S    | exonic     | ELL3      | missense | NM_025165:p.E277Q     |
| 7313 | 15 | 60780660  | 60780660  | G | T | G | K    | exonic     | TLN2      | missense | NM_015059:p.D551Y     |
| 7313 | 15 | 60806656  | 60806656  | G | T | G | K    | exonic     | TLN2      | missense | NM_015059:p.A1112S    |
| 7313 | 15 | 72361203  | 72361203  | C | - | G | *-/C | exonic     | CCDC33    | FS_del   | NM_025055:p.A352fs    |
| 7313 | 15 | 82485086  | 82485086  | G | T | G | K    | exonic     | ADAMTSL3  | missense | NM_207517:p.G1517V    |
| 7313 | 16 | 3741731   | 3741731   | T | C | T | Y    | exonic     | CREBBP    | missense | NM_004380:p.Q1259R    |
| 7313 | 16 | 5065388   | 5065388   | A | T | A | W    | splicing   | ALG1      | NA       | NA                    |
| 7313 | 16 | 9765157   | 9765157   | C | T | C | Y    | exonic     | GRIN2A    | missense | NM_001134407:p.D1249N |
| 7313 | 16 | 10181595  | 10181595  | G | C | G | S    | exonic     | GRIN2A    | missense | NM_001134407:p.Q59E   |
| 7313 | 16 | 23907383  | 23907383  | C | T | C | Y    | exonic     | PRKCB     | missense | NM_002738:p.P87S      |
| 7313 | 16 | 49731266  | 49731266  | C | A | C | M    | exonic     | SALL1     | nonsense | NM_002968:p.G790X     |
| 7313 | 16 | 70129135  | 70129135  | G | A | G | R    | exonic     | CHST4     | missense | NM_005769:p.D352N     |
| 7313 | 16 | 74070180  | 74070180  | C | G | C | S    | exonic     | CHST6     | missense | NM_021615:p.A350P     |
| 7313 | 17 | 4672957   | 4672957   | A | T | A | W    | exonic     | PLD2      | missense | NM_002663:p.Y878F     |
| 7313 | 17 | 7518276   | 7518276   | C | G | C | S    | exonic     | TP53      | missense | NM_001126117:p.G112R  |
| 7313 | 17 | 9677873   | 9677873   | A | G | A | R    | exonic     | GLP2R     | missense | NM_004246:p.T72A      |
| 7313 | 17 | 10248473  | 10248473  | T | C | T | Y    | exonic     | MYH8      | missense | NM_002472:p.K863E     |
| 7313 | 17 | 49255563  | 49255563  | C | A | C | M    | exonic     | KIF2B     | missense | NM_032559:p.T57K      |
| 7313 | 17 | 53713018  | 53713018  | G | T | G | K    | exonic     | MPO       | missense | NM_000250:p.A34E      |
| 7313 | 17 | 57022885  | 57022885  | C | A | C | M    | exonic     | NACA2     | missense | NM_199290:p.G147C     |
| 7313 | 17 | 77420125  | 77420125  | G | C | G | S    | exonic     | ARHGDI1   | missense | NM_004309:p.I177M     |
| 7313 | 18 | 5413430   | 5413430   | T | A | T | W    | exonic     | EPB41L3   | missense | NM_012307:p.Y429F     |
| 7313 | 18 | 27189054  | 27189054  | G | T | G | K    | exonic     | DSG1      | missense | NM_001942:p.G966V     |

|      |    |           |           |   |   |   |      |            |          |          |                       |
|------|----|-----------|-----------|---|---|---|------|------------|----------|----------|-----------------------|
| 7313 | 18 | 49102480  | 49102480  | C | A | C | M    | exonic     | DCC      | missense | NM_005215;p.P707T     |
| 7313 | 18 | 62323185  | 62323185  | G | T | G | K    | exonic     | CDH19    | nonsense | NM_021153;p.Y721X     |
| 7313 | 19 | 570252    | 570252    | G | C | G | S    | exonic     | POLRMT   | missense | NM_005035;p.F1037L    |
| 7313 | 19 | 2159933   | 2159933   | G | C | G | S    | splicing   | DOT1L    | NA       | NA                    |
| 7313 | 19 | 7499572   | 7499572   | G | T | G | K    | exonic     | MCOLN1   | missense | NM_020533;p.G323C     |
| 7313 | 19 | 9132546   | 9132546   | A | T | A | W    | exonic     | ZNF317   | missense | NM_020933;p.M409L     |
| 7313 | 19 | 39275684  | 39275684  | T | A | T | W    | intergenic | NA       | NA       | NA                    |
| 7313 | 19 | 41809402  | 41809402  | C | A | C | M    | exonic     | ZNF382   | missense | NM_032825;p.L255I     |
| 7313 | 19 | 42561932  | 42561932  | A | C | A | M    | exonic     | ZNF527   | missense | NM_032453;p.Q35P      |
| 7313 | 19 | 47003028  | 47003028  | A | T | A | W    | intronic   | CEACAM3  | NA       | NA                    |
| 7313 | 19 | 56072036  | 56072036  | T | A | T | W    | exonic     | KLK2     | nonsense | NM_005551;p.L197X     |
| 7313 | 19 | 57086239  | 57086239  | C | A | C | M    | exonic     | ZNF649   | missense | NM_023074;p.S321I     |
| 7313 | 19 | 60381452  | 60381452  | G | C | G | S    | exonic     | SYT5     | missense | NM_003180;p.T59R      |
| 7313 | 19 | 60403676  | 60403676  | T | A | T | W    | exonic     | PTPRH    | missense | NM_001161440;p.N209I  |
| 7313 | 19 | 61055539  | 61055539  | G | T | G | K    | splicing   | NLRP4    | NA       | NA                    |
| 7313 | 20 | 1517206   | 1517206   | C | A | C | M    | intronic   | SIRPB1   | NA       | NA                    |
| 7313 | 20 | 8718179   | 8718179   | T | C | T | Y    | exonic     | PLCB1    | missense | NM_182734;p.M1098T    |
| 7313 | 20 | 22964835  | 22964835  | C | A | C | M    | exonic     | SSTR4    | missense | NM_001052;p.R239S     |
| 7313 | 21 | 9963844   | 9963844   | C | A | C | M    | splicing   | TPTE     | NA       | NA                    |
| 7313 | 22 | 45083124  | 45083124  | G | A | G | R    | exonic     | GTSE1    | missense | NM_016426;p.D128N     |
| 7313 | 22 | 45174373  | 45174373  | C | A | C | M    | exonic     | CELSR1   | nonsense | NM_014246;p.E1773X    |
| 7313 | X  | 2782104   | 2782104   | A | G | A | R    | exonic     | GYG2     | missense | NM_003918;p.K109R     |
| 7313 | X  | 13666895  | 13666895  | A | G | A | R    | exonic     | OFD1     | missense | NM_003611;p.M108V     |
| 7313 | X  | 26146028  | 26146028  | G | T | G | K    | intergenic | NA       | NA       | NA                    |
| 7313 | X  | 29883324  | 29883324  | G | A | G | R    | exonic     | IL1RAPL1 | missense | NM_014271;p.M519I     |
| 7313 | X  | 48921364  | 48921364  | A | G | R | R    | exonic     | PRICKLE3 | missense | NM_006150;p.R293C     |
| 7313 | X  | 57179437  | 57179437  | G | T | G | K    | exonic     | SPIN2A   | missense | NM_019003;p.L107I     |
| 7313 | X  | 85954605  | 85954605  | G | T | G | K    | exonic     | DACH2    | missense | NM_001139515;p.G277V  |
| 7313 | X  | 104365342 | 104365342 | A | G | A | R    | exonic     | IL1RAPL2 | missense | NM_017416;p.K181E     |
| 7313 | X  | 104537558 | 104537558 | C | A | C | M    | intronic   | IL1RAPL2 | NA       | NA                    |
| 7313 | X  | 107290436 | 107290436 | G | A | G | R    | exonic     | COL4A6   | missense | NM_001847;p.P1481S    |
| 7313 | X  | 130506577 | 130506577 | G | T | G | K    | exonic     | OR13H1   | missense | NM_001004486;p.M283I  |
| 7313 | X  | 152685681 | 152685681 | G | A | G | R    | exonic     | PLXNB3   | missense | NM_001163257;p.G92S   |
| 7313 | Y  | 15451648  | 15451648  | G | T | G | K    | exonic     | NLGN4Y   | missense | NM_014893;p.D486Y     |
| 7313 | M  | 11752     | 11752     | A | G | A | R    | intergenic | NA       | NA       | NA                    |
| 7945 | 1  | 62359526  | 62359526  | G | A | G | R    | exonic     | INADL    | missense | NM_176877;p.R1659K    |
| 7945 | 1  | 183031450 | 183031450 | C | T | C | Y    | exonic     | FAM129A  | missense | NM_052966;p.E691K     |
| 7945 | 1  | 218893175 | 218893175 | G | - | T | */-G | exonic     | MARK1    | FS_del   | NM_018650;p.G616fs    |
| 7945 | 1  | 245761921 | 245761921 | G | C | G | S    | exonic     | OR2C3    | missense | NM_198074;p.N172K     |
| 7945 | 16 | 1440569   | 1440569   | G | A | G | R    | exonic     | CLCN7    | missense | NM_001287;p.P516L     |
| 7996 | 1  | 70250137  | 70250137  | C | A | C | M    | exonic     | LRRC7    | nonsense | NM_020794;p.Y320X     |
| 7996 | 1  | 70250138  | 70250138  | C | A | C | M    | exonic     | LRRC7    | missense | NM_020794;p.L321I     |
| 7996 | 1  | 153716158 | 153716158 | C | T | C | Y    | exonic     | ASH1L    | missense | NM_018489;p.G1043R    |
| 7996 | 1  | 157210169 | 157210169 | G | T | G | K    | exonic     | PYHIN1   | missense | NM_198928;p.A481S     |
| 7996 | 1  | 175492926 | 175492926 | T | G | T | K    | intronic   | FAM5B    | NA       | NA                    |
| 7996 | 1  | 195015086 | 195015086 | G | T | G | K    | exonic     | CFHR3    | missense | NM_001166624;p.W77L   |
| 7996 | 1  | 195015087 | 195015087 | G | T | G | K    | exonic     | CFHR3    | missense | NM_001166624;p.W77C   |
| 7996 | 1  | 195670714 | 195670714 | C | T | C | Y    | exonic     | CRB1     | missense | NM_001193640;p.T921I  |
| 7996 | 1  | 214324761 | 214324761 | G | T | G | K    | exonic     | USH2A    | missense | NM_206933;p.P1690H    |
| 7996 | 1  | 214324762 | 214324762 | G | T | G | K    | exonic     | USH2A    | missense | NM_206933;p.P1690T    |
| 7996 | 1  | 218158271 | 218158271 | C | A | C | M    | exonic     | SLC30A10 | missense | NM_018713;p.A303S     |
| 7996 | 2  | 79203539  | 79203539  | C | G | C | S    | exonic     | REG1A    | missense | NM_002909;p.P129R     |
| 7996 | 2  | 223625884 | 223625884 | G | T | G | K    | exonic     | KCNE4    | missense | NM_080671;p.G31V      |
| 7996 | 3  | 152648252 | 152648252 | C | T | C | Y    | exonic     | IGSF10   | missense | NM_178822;p.R736H     |
| 7996 | 3  | 167030624 | 167030624 | G | C | G | S    | exonic     | BCHE     | missense | NM_000055;p.Q298E     |
| 7996 | 4  | 35811396  | 35811396  | T | C | T | Y    | exonic     | ARAP2    | missense | NM_015230;p.I1092V    |
| 7996 | 4  | 110672006 | 110672006 | G | A | G | R    | exonic     | SEC24B   | missense | NM_001042734;p.G1055D |
| 7996 | 4  | 126590385 | 126590385 | G | A | G | R    | exonic     | FAT4     | missense | NM_024582;p.A2922T    |
| 7996 | 5  | 70854394  | 70854394  | G | A | G | R    | exonic     | BDP1     | missense | NM_018429;p.G1750D    |
| 7996 | 5  | 140543397 | 140543397 | C | A | C | M    | exonic     | PCDHB16  | nonsense | NM_020957;p.S360X     |
| 7996 | 5  | 167815062 | 167815062 | A | C | A | M    | exonic     | VWVC1    | missense | NM_001161662;p.K928Q  |
| 7996 | 6  | 10803254  | 10803254  | T | C | T | Y    | exonic     | PAK1IP1  | missense | NM_017906;p.V17A      |
| 7996 | 6  | 21063796  | 21063796  | G | A | G | R    | splicing   | CDKAL1   | NA       | NA                    |
| 7996 | 6  | 159103153 | 159103153 | A | G | A | R    | exonic     | SYTL3    | missense | NM_001009991;p.N423S  |
| 7996 | 8  | 53188343  | 53188343  | T | A | T | W    | exonic     | ST18     | missense | NM_014682;p.I1038F    |
| 7996 | 8  | 54304587  | 54304587  | G | C | G | S    | exonic     | OPRK1    | missense | NM_000912;p.N322K     |
| 7996 | 9  | 26989622  | 26989622  | G | C | G | S    | exonic     | LRRC19   | missense | NM_022901;p.S24C      |
| 7996 | 9  | 33913820  | 33913820  | A | T | A | W    | exonic     | UBAP2    | missense | NM_018449;p.S923R     |
| 7996 | 9  | 70818216  | 70818216  | A | C | A | M    | exonic     | PRKACG   | missense | NM_002732;p.Y205D     |
| 7996 | 9  | 115971349 | 115971349 | G | A | G | R    | exonic     | COL27A1  | missense | NM_032888;p.D565N     |
| 7996 | 10 | 78502956  | 78502956  | C | A | C | M    | exonic     | KCNMA1   | missense | NM_001161352;p.A552S  |
| 7996 | 11 | 6847814   | 6847814   | G | T | G | K    | exonic     | OR10A2   | missense | NM_001004460;p.A85S   |
| 7996 | 11 | 34090188  | 34090188  | A | G | A | R    | exonic     | NAT10    | missense | NM_024662;p.R72G      |
| 7996 | 11 | 55163056  | 55163056  | A | T | A | W    | exonic     | OR4P4    | missense | NM_001004124;p.Y216F  |
| 7996 | 11 | 103413501 | 103413501 | C | G | C | S    | exonic     | DDI1     | missense | NM_001001711;p.N247K  |
| 7996 | 11 | 125010623 | 125010623 | G | T | G | K    | exonic     | CHEK1    | missense | NM_001114121;p.D235Y  |
| 7996 | 12 | 54890445  | 54890445  | C | T | C | Y    | exonic     | RNF41    | missense | NM_194358;p.G18S      |
| 7996 | 12 | 56302881  | 56302881  | T | C | T | Y    | exonic     | SLC26A10 | missense | NM_133489;p.I279T     |
| 7996 | 14 | 71274712  | 71274712  | A | T | A | W    | splicing   | SIPA1L1  | missense | NM_015556;p.S1730C    |

|         |    |           |           |   |   |   |      |          |          |          |                       |
|---------|----|-----------|-----------|---|---|---|------|----------|----------|----------|-----------------------|
| 7996    | 15 | 19037939  | 19037939  | G | T | G | K    | ncRNA    | GOLGA8C  | NA       | NA                    |
| 7996    | 15 | 49072982  | 49072982  | G | A | G | R    | exonic   | AP4E1    | missense | NM_007347:p.M738I     |
| 7996    | 15 | 54470875  | 54470875  | A | G | A | R    | exonic   | TEX9     | missense | NM_198524:p.L180V     |
| 7996    | 15 | 66774636  | 66774636  | C | A | C | M    | exonic   | CORO2B   | nonsense | NM_001190457:p.S102X  |
| 7996    | 16 | 17119217  | 17119217  | C | T | C | Y    | exonic   | XYLT1    | missense | NM_022166:p.V782I     |
| 7996    | 16 | 74220863  | 74220863  | T | C | T | Y    | exonic   | KARS     | missense | NM_001130089:p.E529G  |
| 7996    | 17 | 7519188   | 7519188   | C | G | C | S    | exonic   | TP53     | missense | NM_001126117:p.R24P   |
| 7996    | 17 | 53413139  | 53413139  | G | C | G | S    | exonic   | VEZF1    | missense | NM_007146:p.T267S     |
| 7996    | 18 | 3492541   | 3492541   | G | A | G | R    | exonic   | DLGAP1   | missense | NM_004746:p.H892Y     |
| 7996    | 18 | 32552519  | 32552519  | G | T | G | K    | exonic   | FHOD3    | missense | NM_025135:p.R912L     |
| 7996    | 19 | 4122710   | 4122710   | C | A | C | M    | exonic   | CREB3L3  | missense | NM_032607:p.P377Q     |
| 7996    | 19 | 47601553  | 47601553  | C | G | C | S    | splicing | LIPE     | missense | NM_005357:p.G789A     |
| 7996    | 19 | 51080101  | 51080101  | C | A | C | M    | exonic   | IRF2BP1  | missense | NM_015649:p.A258S     |
| 7996    | 19 | 59446590  | 59446590  | G | A | G | R    | exonic   | LILRB5   | missense | NM_006840:p.P549S     |
| 7996    | 22 | 29341366  | 29341366  | C | A | C | M    | exonic   | TCN2     | missense | NM_000355:p.T220N     |
| 7996    | X  | 26122677  | 26122677  | G | A | G | R    | exonic   | MAGEB6   | missense | NM_173523:p.V265I     |
| 7996    | X  | 29324443  | 29324443  | T | A | T | W    | exonic   | IL1RAPL1 | missense | NM_014271:p.F170L     |
| 7996    | X  | 35895716  | 35895716  | C | A | C | M    | exonic   | CXorf22  | missense | NM_152632:p.R554S     |
| 7996    | X  | 148851571 | 148851571 | T | A | T | W    | exonic   | CXorf40B | missense | NM_001013845:p.N109I  |
| L383    | 3  | 75869463  | 75869463  | T | A | T | W    | exonic   | ZNF717   | missense | NM_001128223:p.R667S  |
| LU-1516 | 1  | 245090919 | 245090919 | G | A | G | R    | exonic   | AHCTF1   | missense | NM_015446:p.A1355V    |
| LU-1516 | 5  | 67605579  | 67605579  | C | T | C | Y    | exonic   | PIK3R1   | nonsense | NM_181523:p.R162X     |
| LU-1516 | 6  | 31233141  | 31233141  | C | A | C | M    | splicing | CHCHR1   | missense | NM_001105563:p.R72S   |
| LU-1516 | 6  | 52872771  | 52872771  | A | G | A | R    | exonic   | GSTA3    | missense | NM_000847:p.C112R     |
| LU-1516 | 7  | 55227009  | 55227009  | T | G | T | K    | exonic   | EGFR     | missense | NM_005228:p.L858R     |
| LU-1516 | 8  | 87311171  | 87311171  | C | T | C | Y    | exonic   | SLC7A13  | missense | NM_138817:p.R151H     |
| LU-1516 | X  | 9824046   | 9824046   | C | A | C | M    | exonic   | SHROOM2  | missense | NM_001649:p.R700S     |
| LU-1800 | 3  | 135036120 | 135036120 | C | G | C | S    | exonic   | RAB6B    | missense | NM_016577:p.S184T     |
| LU-1991 | 1  | 33840574  | 33840574  | C | A | C | M    | exonic   | CSMD2    | missense | NM_052896:p.G2233V    |
| LU-1991 | 1  | 67211197  | 67211197  | T | G | T | K    | exonic   | MIER1    | missense | NM_001146112:p.C2666G |
| LU-1991 | 1  | 77760111  | 77760111  | G | T | G | K    | exonic   | AK5      | missense | NM_012093:p.L415F     |
| LU-1991 | 1  | 116069698 | 116069698 | C | A | C | M    | splicing | CASQ2    | NA       | NA                    |
| LU-1991 | 1  | 148165212 | 148165212 | G | C | G | S    | exonic   | SF3B4    | missense | NM_005850:p.T129S     |
| LU-1991 | 1  | 153416390 | 153416390 | G | A | G | R    | splicing | TRIM46   | silent   | NM_025058:p.E303E     |
| LU-1991 | 1  | 156565843 | 156565843 | C | G | C | S    | exonic   | CD1B     | missense | NM_001764:p.G276A     |
| LU-1991 | 1  | 174317038 | 174317038 | G | A | G | R    | exonic   | RFWD2    | nonsense | NM_022457:p.R384X     |
| LU-1991 | 1  | 178418035 | 178418035 | G | T | G | K    | exonic   | RSOX1    | missense | NM_001004128:p.C237F  |
| LU-1991 | 1  | 201404786 | 201404786 | C | T | C | Y    | exonic   | MYBPH    | missense | NM_004997:p.A430T     |
| LU-1991 | 1  | 210218392 | 210218392 | G | C | G | S    | exonic   | INTS7    | missense | NM_001199809:p.H390D  |
| LU-1991 | 1  | 210218393 | 210218393 | C | A | C | M    | exonic   | INTS7    | missense | NM_001199809:p.L389F  |
| LU-1991 | 1  | 212237806 | 212237806 | G | C | G | S    | exonic   | PROX1    | missense | NM_002763:p.Q435H     |
| LU-1991 | 1  | 213920329 | 213920329 | G | A | G | R    | exonic   | USH2A    | nonsense | NM_206933:p.Q4027X    |
| LU-1991 | 1  | 214436544 | 214436544 | G | C | G | S    | exonic   | USH2A    | missense | NM_007123:p.Q1409E    |
| LU-1991 | 1  | 225240900 | 225240900 | C | G | C | S    | exonic   | ADCK3    | missense | NM_020247:p.L595V     |
| LU-1991 | 1  | 234220832 | 234220832 | C | A | C | M    | exonic   | NID1     | missense | NM_002508:p.A969S     |
| LU-1991 | 1  | 241534662 | 241534662 | G | T | G | K    | exonic   | SDCCAG8  | nonsense | NM_006642:p.E234X     |
| LU-1991 | 2  | 11252590  | 11252590  | T | A | T | W    | exonic   | ROCK2    | missense | NM_004850:p.E1154V    |
| LU-1991 | 2  | 26538102  | 26538102  | C | A | C | M    | exonic   | OTOF     | missense | NM_194248:p.W1833C    |
| LU-1991 | 2  | 26538103  | 26538103  | C | A | C | M    | exonic   | OTOF     | missense | NM_194248:p.W1833L    |
| LU-1991 | 2  | 27160005  | 27160005  | G | C | G | S    | exonic   | EMILIN1  | missense | NM_007046:p.E688Q     |
| LU-1991 | 2  | 29793994  | 29793994  | C | A | C | M    | exonic   | ALK      | missense | NM_004304:p.W247C     |
| LU-1991 | 2  | 33388025  | 33388025  | G | T | G | K    | exonic   | LTBP1    | missense | NM_206943:p.D1168Y    |
| LU-1991 | 2  | 39850514  | 39850514  | - | T | G | */+T | exonic   | THUMP2   | FS_ins   | NM_025264:p.T171fs    |
| LU-1991 | 2  | 44055401  | 44055401  | T | A | T | W    | splicing | LRPPRC   | missense | NM_133259:p.T289S     |
| LU-1991 | 2  | 48545597  | 48545597  | G | A | G | R    | exonic   | KLRAQ1   | missense | NM_152994:p.A238T     |
| LU-1991 | 2  | 48576422  | 48576422  | A | T | A | W    | ncRNA    | KLRAQ1   | NA       | NA                    |
| LU-1991 | 2  | 61112324  | 61112324  | A | G | A | R    | exonic   | PEX13    | missense | NM_002618:p.Q120R     |
| LU-1991 | 2  | 61501461  | 61501461  | C | G | C | S    | exonic   | USP34    | missense | NM_014709:p.E19Q      |
| LU-1991 | 2  | 63136647  | 63136647  | G | A | G | R    | exonic   | OTX1     | missense | NM_014562:p.A253T     |
| LU-1991 | 2  | 68219425  | 68219425  | C | G | C | S    | exonic   | WDR92    | missense | NM_138458:p.D196H     |
| LU-1991 | 2  | 74687745  | 74687745  | C | G | C | S    | exonic   | C2orf65  | missense | NM_138804:p.K180N     |
| LU-1991 | 2  | 105224759 | 105224759 | C | A | C | M    | exonic   | GPR45    | missense | NM_007227:p.N4K       |
| LU-1991 | 2  | 112977039 | 112977039 | C | T | C | Y    | exonic   | TTL      | missense | NM_153712:p.H229Y     |
| LU-1991 | 2  | 113133798 | 113133798 | G | A | G | R    | exonic   | SLC20A1  | missense | NM_005415:p.G532D     |
| LU-1991 | 2  | 116227309 | 116227309 | C | A | C | M    | exonic   | DPP10    | missense | NM_001004360:p.T340K  |
| LU-1991 | 2  | 116288975 | 116288975 | C | A | C | M    | exonic   | DPP10    | missense | NM_001004360:p.Q606K  |
| LU-1991 | 2  | 162447186 | 162447186 | C | A | C | M    | exonic   | SLC4A10  | missense | NM_022058:p.L364I     |
| LU-1991 | 2  | 163000262 | 163000262 | G | T | G | K    | exonic   | KCNH7    | missense | NM_033272:p.A549D     |
| LU-1991 | 2  | 165729250 | 165729250 | A | T | A | W    | exonic   | SCN3A    | missense | NM_001081676:p.F167Y  |
| LU-1991 | 2  | 167815498 | 167815498 | G | T | G | K    | exonic   | XIRP2    | missense | NM_152381:p.R3117L    |
| LU-1991 | 2  | 185511592 | 185511592 | C | A | C | M    | exonic   | ZNF804A  | missense | NM_194250:p.P1075Q    |
| LU-1991 | 2  | 190136556 | 190136556 | G | T | G | K    | splicing | SLC40A1  | silent   | NM_014585:p.I467I     |
| LU-1991 | 2  | 191989110 | 191989110 | G | C | G | S    | exonic   | MYO1B    | missense | NM_001161819:p.D1062H |
| LU-1991 | 2  | 208197280 | 208197280 | G | A | G | R    | exonic   | FAM119A  | missense | NM_001127395:p.A22V   |
| LU-1991 | 2  | 210350255 | 210350255 | G | T | G | K    | exonic   | UNC80    | missense | NM_182587:p.E109D     |
| LU-1991 | 2  | 228594762 | 228594762 | G | T | G | K    | exonic   | SPHKAP   | missense | NM_001142644:p.D202E  |
| LU-1991 | 2  | 230632291 | 230632291 | T | A | T | W    | exonic   | SLC16A14 | missense | NM_152527:p.I8F       |
| LU-1991 | 2  | 23318618  | 23318618  | C | A | C | M    | exonic   | CHRNA    | missense | NM_005199:p.P501Q     |
| LU-1991 | 3  | 25767600  | 25767600  | C | A | C | M    | exonic   | NGLY1    | missense | NM_001145295:p.L217F  |

|            |           |           |   |   |   |      |            |           |          |                       |
|------------|-----------|-----------|---|---|---|------|------------|-----------|----------|-----------------------|
| LU-1991 3  | 38112387  | 38112387  | G | A | G | R    | exonic     | DLEC1     | missense | NM_007335;p.R706K     |
| LU-1991 3  | 38238145  | 38238145  | G | T | G | K    | exonic     | OXSR1     | missense | NM_005109;p.G188V     |
| LU-1991 3  | 39203099  | 39203099  | G | T | G | K    | exonic     | XIRP1     | missense | NM_001198621;p.P948T  |
| LU-1991 3  | 43364226  | 43364226  | G | A | G | R    | exonic     | SNRK      | missense | NM_017719;p.E491K     |
| LU-1991 3  | 43571774  | 43571774  | C | A | C | M    | splicing   | ANO10     | missense | NM_018075;p.Q556H     |
| LU-1991 3  | 48483609  | 48483609  | C | T | C | Y    | exonic     | TREX1     | missense | NM_016381;p.T239I     |
| LU-1991 3  | 69211988  | 69211988  | C | A | C | M    | exonic     | UBA3      | missense | NM_003968;p.K9N       |
| LU-1991 3  | 109657390 | 109657390 | G | T | G | K    | exonic     | MYH15     | nonsense | NM_014981;p.C735X     |
| LU-1991 3  | 117054125 | 117054125 | G | C | G | S    | exonic     | LSAMP     | missense | NM_002338;p.L182V     |
| LU-1991 3  | 141605301 | 141605301 | C | G | C | S    | exonic     | CLSTN2    | missense | NM_022131;p.Q125E     |
| LU-1991 3  | 167031445 | 167031445 | C | T | C | Y    | exonic     | BCHE      | missense | NM_000055;p.G24E      |
| LU-1991 3  | 186735374 | 186735374 | G | C | G | S    | exonic     | LIPH      | missense | NM_139248;p.S97C      |
| LU-1991 4  | 2099666   | 2099666   | C | A | C | M    | exonic     | POLN      | missense | NM_181808;p.D652Y     |
| LU-1991 4  | 9307476   | 9307476   | G | A | G | R    | intergenic | NA        | NA       | NA                    |
| LU-1991 4  | 12947400  | 12947400  | A | G | A | R    | ncRNA      | HSP90AB2P | NA       | NA                    |
| LU-1991 4  | 20102491  | 20102491  | C | A | C | M    | exonic     | SLIT2     | nonsense | NM_004787;p.S262X     |
| LU-1991 4  | 47807369  | 47807369  | C | T | C | Y    | exonic     | TXK       | missense | NM_003328;p.G130D     |
| LU-1991 4  | 71382154  | 71382154  | C | A | C | M    | exonic     | MUC7      | missense | NM_001145007;p.N368K  |
| LU-1991 4  | 116011556 | 116011556 | C | A | C | M    | splicing   | NDST4     | NA       | NA                    |
| LU-1991 4  | 126631264 | 126631264 | C | G | C | S    | exonic     | FAT4      | missense | NM_024582;p.P4613A    |
| LU-1991 4  | 129262756 | 129262756 | G | T | G | K    | exonic     | LARP1B    | missense | NM_178043;p.W496L     |
| LU-1991 4  | 129262757 | 129262757 | G | A | G | R    | exonic     | LARP1B    | nonsense | NM_178043;p.W496X     |
| LU-1991 4  | 142870498 | 142870498 | G | T | G | K    | exonic     | IL15      | missense | NM_172174;p.V97F      |
| LU-1991 4  | 164658041 | 164658041 | C | A | C | M    | exonic     | C4orf43   | missense | NM_018352;p.P132T     |
| LU-1991 5  | 19519245  | 19519245  | C | A | C | M    | exonic     | CDH18     | missense | NM_001167667;p.M565I  |
| LU-1991 5  | 63292603  | 63292603  | C | A | C | M    | exonic     | HTR1A     | nonsense | NM_000524;p.E234X     |
| LU-1991 5  | 75463346  | 75463346  | C | A | C | M    | exonic     | SV2C      | nonsense | NM_014979;p.Y5X       |
| LU-1991 5  | 140148263 | 140148263 | G | C | G | S    | exonic     | PCDHA1    | missense | NM_018900;p.G735A     |
| LU-1991 5  | 140162269 | 140162269 | C | A | C | M    | exonic     | PCDHA3    | missense | NM_018906;p.L435M     |
| LU-1991 5  | 140168310 | 140168310 | G | T | G | K    | exonic     | PCDHA4    | missense | NM_018907;p.A452S     |
| LU-1991 5  | 140209654 | 140209654 | G | C | G | S    | exonic     | PCDHA9    | missense | NM_031857;p.V464L     |
| LU-1991 5  | 161256708 | 161256708 | A | C | A | M    | exonic     | GABRA1    | missense | NM_001127648;p.K358T  |
| LU-1991 5  | 170278394 | 170278394 | G | T | G | K    | exonic     | RANBP17   | nonsense | NM_022897;p.G343X     |
| LU-1991 5  | 176246670 | 176246670 | C | A | C | M    | exonic     | HK3       | missense | NM_002115;p.G599V     |
| LU-1991 6  | 26216075  | 26216075  | C | T | C | Y    | exonic     | HIST1H1T  | missense | NM_005323;p.D76N      |
| LU-1991 6  | 33397647  | 33397647  | C | G | C | S    | exonic     | DAXX      | missense | NM_001141969;p.D12H   |
| LU-1991 6  | 38939692  | 38939692  | T | A | T | W    | exonic     | DNAH8     | missense | NM_001371;p.S1909T    |
| LU-1991 6  | 55322870  | 55322870  | T | A | T | W    | exonic     | GFRAL     | missense | NM_207410;p.F113Y     |
| LU-1991 6  | 64474055  | 64474055  | C | T | C | Y    | exonic     | PHF3      | missense | NM_015153;p.T1182M    |
| LU-1991 6  | 85503281  | 85503281  | C | G | C | S    | exonic     | TBX18     | missense | NM_001080508;p.L555F  |
| LU-1991 6  | 116863903 | 116863903 | G | T | G | K    | exonic     | DSE       | missense | NM_001080976;p.A527S  |
| LU-1991 6  | 127649791 | 127649791 | T | G | T | K    | exonic     | RNF146    | missense | NM_030963;p.W113G     |
| LU-1991 6  | 127941611 | 127941611 | G | T | G | K    | splicing   | C6orf58   | NA       | NA                    |
| LU-1991 6  | 131263970 | 131263970 | G | T | G | K    | exonic     | EPB41L2   | missense | NM_001199389;p.R325S  |
| LU-1991 6  | 160033761 | 160033761 | G | T | G | K    | exonic     | SOD2      | missense | NM_000636;p.H50N      |
| LU-1991 7  | 20664717  | 20664717  | G | A | G | R    | exonic     | ABCB5     | missense | NM_001163993;p.A89T   |
| LU-1991 7  | 27839084  | 27839084  | G | C | G | S    | exonic     | JAZF1     | missense | NM_175061;p.H198D     |
| LU-1991 7  | 29932598  | 29932598  | C | T | C | Y    | exonic     | SCRN1     | missense | NM_001145514;p.D381N  |
| LU-1991 7  | 100119673 | 100119673 | C | G | C | S    | exonic     | GIGYF1    | missense | NM_022574;p.G592R     |
| LU-1991 7  | 102994403 | 102994403 | C | T | C | Y    | exonic     | RELN      | nonsense | NM_005045;p.W1543X    |
| LU-1991 7  | 103596153 | 103596153 | A | T | A | W    | exonic     | ORC5      | missense | NM_181747;p.I294N     |
| LU-1991 7  | 106311891 | 106311891 | C | - | A | */-C | exonic     | PIK3CG    | FS_del   | NM_002649;p.T939fs    |
| LU-1991 7  | 128283850 | 128283850 | C | G | C | S    | exonic     | FLNC      | missense | NM_001127487;p.Q2399E |
| LU-1991 7  | 142335346 | 142335346 | G | C | G | S    | exonic     | TRPV5     | missense | NM_019841;p.L290V     |
| LU-1991 7  | 142720212 | 142720212 | A | T | A | W    | intergenic | NA        | NA       | NA                    |
| LU-1991 8  | 403021    | 403021    | G | C | G | S    | exonic     | FBXO25    | missense | NM_183421;p.L286F     |
| LU-1991 8  | 15525059  | 15525059  | C | A | C | M    | exonic     | TUSC3     | missense | NM_178234;p.P80T      |
| LU-1991 9  | 18918405  | 18918405  | G | T | G | K    | exonic     | FAM154A   | missense | NM_153707;p.P357H     |
| LU-1991 9  | 66197087  | 66197087  | C | G | C | S    | intergenic | NA        | NA       | NA                    |
| LU-1991 9  | 89935585  | 89935585  | C | G | C | S    | exonic     | FAM75C2   | missense | NM_001166137;p.E729D  |
| LU-1991 9  | 96102064  | 96102064  | A | T | A | W    | exonic     | ZNF169    | nonsense | NM_194320;p.R135X     |
| LU-1991 9  | 103211532 | 103211532 | G | A | G | R    | exonic     | ZNF189    | missense | NM_003452;p.G554D     |
| LU-1991 9  | 134196522 | 134196522 | T | C | T | Y    | exonic     | SETX      | missense | NM_015046;p.N325D     |
| LU-1991 9  | 137811066 | 137811066 | C | A | C | M    | exonic     | KCNT1     | missense | NM_020822;p.P924T     |
| LU-1991 9  | 137811067 | 137811067 | C | A | C | M    | exonic     | KCNT1     | missense | NM_020822;p.P924H     |
| LU-1991 9  | 139261954 | 139261954 | G | C | G | S    | exonic     | FAM166A   | missense | NM_001001710;p.P12R   |
| LU-1991 10 | 13291152  | 13291152  | C | T | C | Y    | intronic   | MCM10     | NA       | NA                    |
| LU-1991 10 | 15160750  | 15160750  | C | A | C | M    | exonic     | ACBD7     | nonsense | NM_001039844;p.G47X   |
| LU-1991 10 | 15726035  | 15726035  | C | T | C | Y    | splicing   | ITGA8     | missense | NM_003638;p.D467N     |
| LU-1991 10 | 33514567  | 33514567  | C | T | C | Y    | exonic     | NRP1      | missense | NM_003873;p.C809Y     |
| LU-1991 10 | 49985924  | 49985924  | C | G | C | S    | exonic     | C10orf72  | missense | NM_144984;p.V60L      |
| LU-1991 10 | 76405173  | 76405173  | A | T | A | W    | exonic     | MYST4     | missense | NM_012330;p.S358C     |
| LU-1991 10 | 82172228  | 82172228  | G | A | G | R    | exonic     | C10orf58  | missense | NM_032333;p.C85Y      |
| LU-1991 10 | 134849851 | 134849851 | T | A | T | W    | exonic     | KNDC1     | missense | NM_152643;p.F337I     |
| LU-1991 11 | 5818851   | 5818851   | G | T | G | K    | exonic     | ORS2E6    | missense | NM_001005167;p.P285T  |
| LU-1991 11 | 8916121   | 8916121   | C | G | C | S    | exonic     | ASCL3     | missense | NM_020646;p.R55P      |
| LU-1991 11 | 18912330  | 18912330  | C | A | C | M    | exonic     | MRGPRX1   | missense | NM_147199;p.G193V     |
| LU-1991 11 | 57727622  | 57727622  | G | C | G | S    | exonic     | OR1S2     | nonsense | NM_001004459;p.S203X  |
| LU-1991 11 | 57926725  | 57926725  | G | C | G | S    | exonic     | OR5B3     | missense | NM_001005469;p.A245G  |

|            |           |           |   |   |   |      |            |          |          |                       |
|------------|-----------|-----------|---|---|---|------|------------|----------|----------|-----------------------|
| LU-1991 11 | 60395024  | 60395024  | G | T | G | K    | exonic     | ZP1      | missense | NM_207341:p.R282I     |
| LU-1991 11 | 65948171  | 65948171  | C | A | C | M    | exonic     | NPAS4    | missense | NM_178864:p.L412I     |
| LU-1991 11 | 68460620  | 68460620  | G | T | G | K    | exonic     | IGHMBP2  | missense | NM_002180:p.G699V     |
| LU-1991 11 | 87940653  | 87940653  | C | A | C | M    | exonic     | GRM5     | nonsense | NM_000842:p.E616X     |
| LU-1991 11 | 87940654  | 87940654  | C | A | C | M    | exonic     | GRM5     | missense | NM_000842:p.R615S     |
| LU-1991 11 | 131904164 | 131904164 | C | A | C | M    | splicing   | OPCML    | NA       | NA                    |
| LU-1991 12 | 1810634   | 1810634   | G | T | G | K    | exonic     | LRTM2    | missense | NM_001163925:p.D114Y  |
| LU-1991 12 | 4606164   | 4606164   | C | A | C | M    | exonic     | AKAP3    | missense | NM_006422:p.G722V     |
| LU-1991 12 | 38963996  | 38963996  | G | T | G | K    | exonic     | LRRK2    | missense | NM_198578:p.G765V     |
| LU-1991 12 | 38973634  | 38973634  | G | T | G | K    | exonic     | LRRK2    | missense | NM_198578:p.V904L     |
| LU-1991 12 | 38984189  | 38984189  | A | T | A | W    | exonic     | LRRK2    | missense | NM_198578:p.N1255Y    |
| LU-1991 12 | 40253811  | 40253811  | T | C | T | Y    | exonic     | PDZRN4   | missense | NM_013377:p.I730T     |
| LU-1991 12 | 42462517  | 42462517  | G | A | G | R    | exonic     | IRAK4    | missense | NM_001114182:p.R361H  |
| LU-1991 12 | 51063841  | 51063841  | G | C | G | S    | exonic     | KRT84    | missense | NM_033045:p.F185L     |
| LU-1991 12 | 67931302  | 67931302  | G | T | G | K    | exonic     | CPSF6    | missense | NM_007007:p.D63Y      |
| LU-1991 12 | 68042907  | 68042907  | G | - | T | */-G | exonic     | YEATS4   | FS_del   | NM_006530:p.G42fs     |
| LU-1991 12 | 75973987  | 75973987  | C | G | C | S    | exonic     | E2F7     | missense | NM_203394:p.E50Q      |
| LU-1991 12 | 92559144  | 92559144  | C | A | C | M    | intergenic | NA       | NA       | NA                    |
| LU-1991 12 | 94431758  | 94431758  | A | G | A | R    | exonic     | METAP2   | missense | NM_006838:p.I462V     |
| LU-1991 12 | 94790303  | 94790303  | C | T | C | Y    | exonic     | CCDC38   | missense | NM_182496:p.E449K     |
| LU-1991 12 | 103991796 | 103991796 | C | A | C | M    | exonic     | ALDH1L2  | missense | NM_001034173:p.D56Y   |
| LU-1991 12 | 105917604 | 105917604 | G | A | G | R    | exonic     | CRY1     | missense | NM_004075:p.A331V     |
| LU-1991 12 | 119451285 | 119451285 | G | T | G | K    | exonic     | COQ5     | missense | NM_032314:p.R15S      |
| LU-1991 12 | 122244906 | 122244906 | C | T | C | Y    | exonic     | MPHOSPH9 | missense | NM_022782:p.E589K     |
| LU-1991 12 | 131120139 | 131120139 | G | C | G | S    | splicing   | EP400    | missense | NM_015409:p.Q3006H    |
| LU-1991 13 | 41771905  | 41771905  | A | G | R | K    | exonic     | AKAP11   | missense | NM_016248:p.M341I     |
| LU-1991 14 | 19833384  | 19833384  | G | A | G | R    | exonic     | TTC5     | missense | NM_138376:p.P329S     |
| LU-1991 14 | 30712334  | 30712334  | C | A | C | M    | exonic     | HECTD1   | missense | NM_015382:p.G312V     |
| LU-1991 14 | 46459051  | 46459051  | G | A | G | R    | exonic     | MDGA2    | missense | NM_001113498:p.R718C  |
| LU-1991 14 | 50294857  | 50294857  | T | G | T | K    | exonic     | NIN      | missense | NM_182946:p.K881Q     |
| LU-1991 14 | 52296167  | 52296167  | T | G | T | K    | exonic     | STYX     | missense | NM_001130701:p.V150G  |
| LU-1991 14 | 91045710  | 91045710  | G | A | G | R    | exonic     | SMEK1    | missense | NM_032560:p.T12M      |
| LU-1991 14 | 101586627 | 101586627 | G | T | G | K    | exonic     | DYNC1H1  | missense | NM_001376:p.G4639C    |
| LU-1991 14 | 104680229 | 104680229 | C | A | C | M    | exonic     | JAG2     | missense | NM_002226:p.D1189Y    |
| LU-1991 15 | 23476497  | 23476497  | C | T | C | Y    | exonic     | ATP10A   | missense | NM_024490:p.V1244M    |
| LU-1991 15 | 40531226  | 40531226  | C | A | C | M    | exonic     | ZFP106   | missense | NM_022473:p.G156V     |
| LU-1991 15 | 50396587  | 50396587  | C | A | C | M    | exonic     | MYO5A    | missense | NM_001142495:p.D1735Y |
| LU-1991 15 | 53763422  | 53763422  | C | G | C | S    | splicing   | PRTG     | NA       | NA                    |
| LU-1991 15 | 56931363  | 56931363  | A | C | A | M    | exonic     | FAM63B   | missense | NM_001040450:p.K548N  |
| LU-1991 15 | 73438537  | 73438537  | G | A | G | R    | exonic     | MAN2C1   | missense | NM_006715:p.S686F     |
| LU-1991 15 | 75260398  | 75260398  | T | C | T | Y    | exonic     | PEAK1    | missense | NM_024776:p.Y309C     |
| LU-1991 16 | 4599718   | 4599718   | G | C | G | S    | exonic     | FAM100A  | missense | NM_145253:p.P151A     |
| LU-1991 16 | 20379016  | 20379016  | A | T | A | W    | exonic     | ACSM2A   | missense | NM_001010845:p.S27C   |
| LU-1991 16 | 30424275  | 30424275  | C | A | C | M    | exonic     | ITGAL    | missense | NM_002209:p.S786Y     |
| LU-1991 16 | 48675701  | 48675701  | A | C | A | M    | exonic     | HEATR3   | missense | NM_182922:p.K430Q     |
| LU-1991 16 | 49733015  | 49733015  | C | T | C | Y    | exonic     | SALL1    | missense | NM_002968:p.V207M     |
| LU-1991 16 | 79772362  | 79772362  | G | C | G | S    | exonic     | PKD1L2   | missense | NM_001076780:p.C671W  |
| LU-1991 16 | 80689448  | 80689448  | G | A | G | R    | exonic     | HSD17B2  | missense | NM_002153:p.G357D     |
| LU-1991 16 | 82786039  | 82786039  | G | C | G | S    | splicing   | ADAD2    | NA       | NA                    |
| LU-1991 16 | 83073763  | 83073763  | T | C | T | Y    | exonic     | KIAA1609 | missense | NM_020947:p.H338R     |
| LU-1991 16 | 85169937  | 85169937  | C | A | C | M    | exonic     | FOXL1    | missense | NM_005250:p.A36D      |
| LU-1991 17 | 3142559   | 3142559   | G | T | G | K    | exonic     | OR3A1    | missense | NM_002550:p.A23E      |
| LU-1991 17 | 7519192   | 7519192   | T | G | T | K    | exonic     | TP53     | missense | NM_001126117:p.T23P   |
| LU-1991 17 | 10157324  | 10157324  | C | A | C | M    | exonic     | MYH13    | nonsense | NM_003802:p.E1353X    |
| LU-1991 17 | 16267804  | 16267804  | G | C | G | S    | exonic     | TRPV2    | missense | NM_016113:p.E308Q     |
| LU-1991 17 | 38090868  | 38090868  | G | T | G | K    | exonic     | CNTNAP1  | nonsense | NM_003632:p.E207X     |
| LU-1991 17 | 38384953  | 38384953  | C | A | C | M    | exonic     | AARSD1   | nonsense | NM_001136042:p.E96X   |
| LU-1991 17 | 70754442  | 70754442  | T | C | T | Y    | exonic     | GGA3     | missense | NM_138619:p.E24G      |
| LU-1991 18 | 570847    | 570847    | G | A | G | R    | exonic     | CETN1    | missense | NM_004066:p.D147N     |
| LU-1991 18 | 6954803   | 6954803   | C | G | C | S    | splicing   | LAMA1    | NA       | NA                    |
| LU-1991 18 | 21058618  | 21058618  | G | T | G | K    | exonic     | ZNF521   | missense | NM_015461:p.L1088M    |
| LU-1991 18 | 21061233  | 21061233  | G | T | G | K    | exonic     | ZNF521   | missense | NM_015461:p.S216Y     |
| LU-1991 18 | 31171252  | 31171252  | A | G | A | R    | exonic     | ZNF24    | missense | NM_006965:p.L350P     |
| LU-1991 18 | 45583177  | 45583177  | C | T | C | Y    | exonic     | ACAA2    | missense | NM_006111:p.G21R      |
| LU-1991 18 | 65953409  | 65953409  | A | G | A | R    | exonic     | RTTN     | missense | NM_173630:p.M959T     |
| LU-2349 1  | 175100160 | 175100160 | G | C | G | S    | exonic     | ASTN1    | missense | NM_004319:p.S1256R    |
| LU-2349 2  | 33393721  | 33393721  | A | G | A | R    | exonic     | LTBP1    | missense | NM_206943:p.N1204S    |
| LU-2349 2  | 165860691 | 165860691 | A | T | A | W    | exonic     | SCN2A    | nonsense | NM_021007:p.K38X      |
| LU-2349 2  | 170782102 | 170782102 | G | T | G | K    | exonic     | MYO3B    | missense | NM_138995:p.R185L     |
| LU-2349 2  | 219597054 | 219597054 | G | T | G | K    | exonic     | CCDC108  | missense | NM_194302:p.T841N     |
| LU-2349 3  | 42274716  | 42274716  | G | C | G | S    | exonic     | CCK      | missense | NM_000729:p.R76G      |
| LU-2349 3  | 132356651 | 132356651 | G | T | G | K    | exonic     | NEK11    | missense | NM_001146003:p.A320S  |
| LU-2349 3  | 135567919 | 135567919 | C | T | C | Y    | exonic     | AMOTL2   | missense | NM_016201:p.S361N     |
| LU-2349 3  | 143986285 | 143986285 | G | T | G | K    | exonic     | TRPC1    | missense | NM_003304:p.G303V     |
| LU-2349 5  | 170327904 | 170327904 | A | T | A | W    | exonic     | RANBP17  | missense | NM_022897:p.E543V     |
| LU-2349 6  | 121618981 | 121618981 | T | C | T | Y    | exonic     | C6orf170 | missense | NM_152730:p.Q628R     |
| LU-2349 7  | 54787609  | 54787609  | T | C | T | Y    | splicing   | SEC61G   | NA       | NA                    |
| LU-2349 7  | 81552054  | 81552054  | C | A | C | M    | exonic     | CACNA2D1 | missense | NM_000722:p.G209C     |
| LU-2349 7  | 124298227 | 124298227 | C | T | C | Y    | exonic     | POT1     | missense | NM_015450:p.D77N      |

|         |    |           |           |      |   |   |         |            |          |          |                           |
|---------|----|-----------|-----------|------|---|---|---------|------------|----------|----------|---------------------------|
| LU-2349 | 7  | 128202403 | 128202403 | G    | T | G | K       | exonic     | OPN1SW   | missense | NM_001708:p.R132S         |
| LU-2349 | 7  | 128280272 | 128280272 | G    | - | A | */-G    | exonic     | FLNC     | FS_del   | NM_001458:c.6159_6159delG |
| LU-2349 | 9  | 130060622 | 130060622 | T    | G | T | K       | exonic     | GOLGA2   | missense | NM_004486:p.E714A         |
| LU-2349 | 10 | 115364589 | 115364589 | T    | A | T | W       | splicing   | NRAP     | missense | NM_006175:p.D1027V        |
| LU-2349 | 10 | 127833839 | 127833839 | C    | G | C | S       | exonic     | ADAM12   | missense | NM_021641:p.E96Q          |
| LU-2349 | 11 | 1575958   | 1575958   | G    | T | G | K       | exonic     | KRTAP5-2 | silent   | NM_001004325:p.S33S       |
| LU-2349 | 11 | 65947914  | 65947914  | T    | A | T | W       | exonic     | NPAS4    | nonsense | NM_178864:p.L326X         |
| LU-2349 | 12 | 5024095   | 5024095   | G    | C | G | S       | exonic     | KCNA5    | missense | NM_002234:p.G174A         |
| LU-2349 | 12 | 55261887  | 55261887  | G    | T | G | K       | exonic     | RBMS2    | missense | NM_002898:p.V246F         |
| LU-2349 | 12 | 77122921  | 77122921  | C    | A | C | M       | exonic     | NAV3     | missense | NM_014903:p.L2282M        |
| LU-2349 | 14 | 46190581  | 46190581  | C    | A | C | M       | exonic     | RPL10L   | missense | NM_080746:p.G37C          |
| LU-2349 | 14 | 50546922  | 50546922  | C    | G | C | S       | exonic     | TRIM9    | missense | NM_015163:p.R361P         |
| LU-2349 | 16 | 56540768  | 56540768  | C    | A | C | M       | exonic     | CNGB1    | nonsense | NM_001297:p.E371X         |
| LU-2349 | 19 | 17337411  | 17337411  | C    | A | C | M       | exonic     | PLVAP    | missense | NM_031310:p.R288L         |
| LU-2349 | 19 | 56421026  | 56421026  | A    | G | A | R       | exonic     | CD33     | missense | NM_001082618:p.T65A       |
| LU-2349 | 20 | 801637    | 801637    | G    | A | G | R       | exonic     | ANGPT4   | missense | NM_015985:p.A493V         |
| LU-2349 | 20 | 2544813   | 2544813   | A    | C | A | M       | exonic     | TMC2     | missense | NM_080751:p.N635H         |
| LU-2349 | 20 | 6707411   | 6707411   | G    | T | G | K       | exonic     | BMP2     | missense | NM_001200:p.R289L         |
| LU-2349 | 22 | 35908638  | 35908638  | T    | A | T | W       | exonic     | C1QTNF6  | missense | NM_031910:p.S125C         |
| LU-2349 | X  | 26068000  | 26068000  | C    | A | C | M       | exonic     | MAGEB18  | missense | NM_173699:p.A326D         |
| LU-2349 | X  | 53287799  | 53287799  | G    | T | G | K       | exonic     | IQSEC2   | missense | NM_015075:p.H764Q         |
| LU-2349 | X  | 55531590  | 55531590  | G    | T | G | K       | exonic     | USP51    | missense | NM_201286:p.L170I         |
| LU-2349 | X  | 150874627 | 150874627 | A    | C | A | M       | exonic     | GABRE    | missense | NM_004961:p.Y336D         |
| Lu-2375 | 11 | 408922    | 408922    | C    | T | C | Y       | exonic     | ANO9     | missense | NM_001012302:p.G668R      |
| Lu-2375 | M  | 10947     | 10947     | -    | C | A | */+C    | intergenic | NA       | NA       | NA                        |
| Lu-597  | 3  | 47136892  | 47136895  | CTCT | - | A | */-CTCT | exonic     | SETD2    | FS_del   | NM_014159:c.4235_4238del  |
| Lu-597  | 6  | 43856533  | 43856533  | G    | A | G | R       | exonic     | VEGFA    | missense | NM_001171623:p.R170H      |
| Lu-597  | 12 | 121946481 | 121946481 | G    | C | G | S       | exonic     | VPS37B   | missense | NM_024667:p.L28V          |
| Lu-597  | 20 | 33776439  | 33776439  | A    | T | A | W       | exonic     | RBM39    | missense | NM_184234:p.C157S         |



**Supplementary Table 9.** Missense mutations predicted to affect protein function

| sample | chr | pos       | ref | var | aa_pos | aa_ref | aa_alt | gene_name | CCDSid      | PolyPhen2_pred | SIFT_pred | Prophet | LRT_pred | MutationTaster_pred |
|--------|-----|-----------|-----|-----|--------|--------|--------|-----------|-------------|----------------|-----------|---------|----------|---------------------|
| 12586  | 1   | 68677832  | C   | T   | 242    | S      | N      | RPE65     | CCDS643.1   | C              | D         | D       | D        | D                   |
| 12586  | 1   | 70291385  | G   | A   | 1362   | R      | Q      | LRRC7     | CCDS645.1   | C              | D         | D       | D        | N                   |
| 12586  | 1   | 90172413  | G   | T   | 400    | V      | F      | LRRC8D    | CCDS726.1   | C              | D         | D       | D        | D                   |
| 12586  | 1   | 156783775 | G   | T   | 249    | H      | N      | OR6Y1     | CCDS30899.1 | C              | D         | D       | D        | N                   |
| 12586  | 1   | 246636879 | G   | T   | 321    | D      | Y      | OR2T1     | CCDS31115.1 | C              | D         | D       | U        | D                   |
| 12586  | 2   | 37141282  | C   | A   | 599    | G      | C      | HEATR5B   | CCDS33181.1 | C              | D         | D       | D        | D                   |
| 12586  | 2   | 170079381 | A   | G   | 388    | R      | G      | KBTBD10   | CCDS2234.1  | C              | D         | D       | D        | NA                  |
| 12586  | 3   | 115553043 | C   | A   | 118    | R      | L      | ZBTB20    | CCDS2981.1  | C              | T         | D       | D        | D                   |
| 12586  | 4   | 47545094  | A   | G   | 860    | F      | S      | NFXL1     | CCDS3478.2  | C              | D         | D       | D        | D                   |
| 12586  | 5   | 13882800  | G   | C   | 2088   | A      | G      | DNAH5     | CCDS3882.1  | C              | D         | D       | D        | D                   |
| 12586  | 5   | 24571068  | T   | A   | 242    | M      | L      | CDH10     | CCDS3892.1  | C              | D         | D       | D        | D                   |
| 12586  | 5   | 37161125  | G   | A   | 1823   | P      | L      | C5orf42   | CCDS34146.1 | C              | D         | D       | D        | N                   |
| 12586  | 5   | 76206962  | G   | T   | 8      | A      | S      | S100Z     | CCDS43333.1 | C              | D         | P       | D        | D                   |
| 12586  | 6   | 54174938  | C   | A   | 354    | P      | H      | C6orf142  | CCDS4954.1  | C              | D         | D       | D        | N                   |
| 12586  | 6   | 70105948  | C   | G   | 1097   | A      | G      | BAI3      | CCDS4968.1  | C              | D         | D       | D        | D                   |
| 12586  | 6   | 97160532  | G   | T   | 123    | W      | L      | FHL5      | CCDS5035.1  | C              | D         | D       | D        | D                   |
| 12586  | 6   | 102372975 | C   | A   | 414    | T      | K      | GRIK2     | CCDS5048.1  | C              | D         | D       | D        | D                   |
| 12586  | 8   | 41673173  | G   | T   | 942    | T      | K      | ANK1      | CCDS6119.1  | C              | D         | D       | D        | D                   |
| 12586  | 8   | 80841501  | C   | A   | 91     | A      | S      | HEY1      | CCDS6225.1  | C              | D         | D       | D        | D                   |
| 12586  | 8   | 82522116  | T   | C   | 21     | M      | V      | PMP2      | CCDS6229.1  | C              | D         | D       | D        | D                   |
| 12586  | 8   | 113346981 | C   | A   | 3175   | D      | Y      | CSMD3     | CCDS6315.1  | C              | D         | D       | D        | D                   |
| 12586  | 9   | 92646131  | A   | G   | 44     | S      | G      | SYK       | CCDS6688.1  | C              | T         | D       | D        | D                   |
| 12586  | 10  | 15295965  | C   | A   | 543    | R      | L      | FAM171A1  | CCDS31154.1 | C              | D         | D       | D        | D                   |
| 12586  | 10  | 26495058  | G   | T   | 1019   | C      | F      | MYO3A     | CCDS7148.1  | C              | D         | D       | D        | D                   |
| 12586  | 10  | 100232503 | G   | A   | 498    | T      | I      | HPSE2     | CCDS7477.1  | C              | D         | B       | D        | D                   |
| 12586  | 10  | 102247416 | C   | G   | 663    | C      | S      | SEC31B    | CCDS7495.1  | C              | D         | D       | D        | D                   |
| 12586  | 11  | 22248457  | G   | T   | 641    | R      | L      | ANO5      | CCDS31444.1 | C              | T         | D       | D        | D                   |
| 12586  | 11  | 64253033  | C   | T   | 550    | R      | H      | RASGRP2   | CCDS31598.1 | C              | D         | D       | D        | D                   |
| 12586  | 11  | 64253034  | G   | T   | 550    | R      | S      | RASGRP2   | CCDS31598.1 | C              | D         | D       | D        | D                   |
| 12586  | 11  | 65374218  | C   | A   | 92     | P      | T      | SNX32     | CCDS8113.2  | C              | D         | D       | N        | D                   |
| 12586  | 11  | 75846878  | G   | A   | 83     | M      | I      | C11orf30  | CCDS8244.1  | C              | T         | D       | D        | D                   |
| 12586  | 11  | 107711791 | G   | T   | 2721   | D      | Y      | ATM       | CCDS31669.1 | C              | D         | D       | D        | D                   |
| 12586  | 12  | 7531663   | T   | A   | 570    | S      | C      | CD163     | CCDS8578.1  | C              | D         | D       | N        | D                   |
| 12586  | 12  | 25289552  | C   | A   | 12     | G      | C      | KRAS      | CCDS8702.1  | C              | D         | B       | D        | D                   |
| 12586  | 12  | 95575969  | G   | T   | 185    | W      | L      | C12orf63  | CCDS9062.1  | C              | D         | D       | D        | N                   |
| 12586  | 13  | 40415235  | T   | A   | 220    | D      | V      | ELF1      | CCDS9374.1  | C              | D         | D       | D        | D                   |
| 12586  | 14  | 51804820  | G   | T   | 180    | G      | C      | PTGDR     | CCDS9707.1  | C              | D         | D       | D        | D                   |

|       |    |           |   |   |      |   |   |          |             |   |    |    |   |    |
|-------|----|-----------|---|---|------|---|---|----------|-------------|---|----|----|---|----|
| 12586 | 14 | 85158014  | C | G | 135  | L | V | FLRT2    | CCDS9877.1  | C | D  | P  | D | D  |
| 12586 | 15 | 46821518  | C | T | 1247 | E | K | CEP152   | CCDS42033.1 | C | D  | D  | D | N  |
| 12586 | 16 | 21005814  | T | G | 912  | K | Q | DNAH3    | CCDS10594.1 | C | T  | D  | D | D  |
| 12586 | 16 | 49343313  | G | T | 268  | D | Y | CYLD     | CCDS42164.1 | C | D  | D  | D | D  |
| 12586 | 18 | 12018944  | G | T | 235  | A | S | IMPA2    | CCDS11855.1 | C | D  | B  | D | D  |
| 12586 | 18 | 21866382  | C | A | 403  | Q | H | SS18     | CCDS32807.1 | C | D  | NA | D | D  |
| 12586 | 20 | 35097307  | G | A | 641  | P | L | RBL1     | CCDS13289.1 | C | D  | D  | D | D  |
| 12586 | 20 | 48629202  | G | T | 265  | D | Y | PTPN1    | CCDS13430.1 | C | D  | D  | D | D  |
| 12586 | 20 | 51305849  | G | T | 815  | R | S | TSHZ2    | CCDS33490.1 | C | T  | D  | D | D  |
| 12586 | 20 | 55574055  | C | T | 553  | T | M | PCK1     | CCDS13460.1 | C | D  | D  | D | D  |
| 12586 | X  | 2955389   | C | A | 358  | R | S | ARSH     | CCDS35198.1 | C | D  | D  | U | D  |
| 12586 | X  | 10495154  | C | A | 145  | C | F | MID1     | CCDS14138.1 | C | NA | D  | D | D  |
| 12586 | X  | 18930954  | G | T | 718  | L | M | GPR64    | CCDS14191.1 | C | D  | D  | D | N  |
| 12586 | X  | 24676989  | G | T | 969  | A | S | POLA1    | CCDS14214.1 | C | D  | P  | D | D  |
| 12586 | X  | 46917495  | G | T | 153  | G | C | RBM10    | CCDS14274.1 | C | D  | D  | D | D  |
| 12586 | X  | 78313413  | C | A | 85   | P | T | GPR174   | CCDS14443.1 | C | D  | D  | D | N  |
| 12586 | X  | 125126957 | C | A | 211  | G | V | WDR40C   | CCDS43991.1 | C | D  | D  | N | D  |
| 12586 | X  | 147862768 | G | C | 1116 | D | H | AFF2     | CCDS14684.1 | C | D  | D  | D | D  |
| 12804 | 13 | 45475416  | G | A | 268  | P | L | ZC3H13   | CCDS9400.1  | C | D  | NA | D | D  |
| 12804 | 20 | 61546593  | C | A | 185  | A | S | KCNQ2    | CCDS13518.1 | C | D  | D  | D | D  |
| 12804 | X  | 153597687 | G | T | 62   | L | I | GAB3     | CCDS14760.1 | C | D  | D  | D | D  |
| 12820 | 1  | 17227693  | C | T | 138  | D | N | SDHB     | CCDS176.1   | C | D  | D  | D | D  |
| 12820 | 1  | 71285043  | G | T | 269  | S | Y | PTGER3   | CCDS652.1   | C | D  | D  | D | NA |
| 12820 | 1  | 103161526 | G | T | 1203 | P | Q | COL11A1  | CCDS778.1   | C | D  | NA | D | D  |
| 12820 | 2  | 234345709 | A | T | 453  | D | V | UGT1A9   | CCDS2505.1  | C | D  | D  | D | D  |
| 12820 | 3  | 120106185 | C | T | 284  | R | K | IGSF11   | CCDS2983.1  | C | T  | D  | D | D  |
| 12820 | 3  | 148611335 | T | C | 249  | M | T | ZIC1     | CCDS3136.1  | C | D  | D  | D | D  |
| 12820 | 3  | 195888990 | G | T | 49   | R | L | FAM43A   | CCDS33923.1 | C | D  | D  | D | D  |
| 12820 | 5  | 1087953   | G | A | 170  | R | H | NKD2     | CCDS3859.1  | C | D  | D  | D | D  |
| 12820 | 5  | 37007856  | C | T | 275  | P | L | NIPBL    | CCDS3920.1  | C | D  | D  | D | D  |
| 12820 | 7  | 81169946  | C | G | 692  | V | L | HGF      | CCDS5597.1  | C | D  | P  | D | D  |
| 12820 | 7  | 95638731  | T | C | 407  | I | V | SLC25A13 | CCDS5645.1  | C | D  | B  | D | D  |
| 12820 | 7  | 134773617 | C | A | 1    | M | I | CNOT4    | CCDS43650.1 | C | D  | D  | D | A  |
| 12820 | 9  | 8508246   | C | A | 369  | G | V | PTPRD    | CCDS6472.1  | C | D  | D  | D | D  |
| 12820 | 11 | 17390860  | G | C | 829  | L | V | ABCC8    | CCDS31437.1 | C | D  | D  | D | P  |
| 12820 | 11 | 22340914  | T | A | 239  | Y | N | SLC17A6  | CCDS7856.1  | C | T  | D  | D | D  |
| 12820 | 12 | 20925157  | G | T | 478  | G | V | SLCO1B3  | CCDS8684.1  | C | D  | D  | D | N  |
| 12820 | 12 | 29601162  | C | T | 416  | G | E | TMTC1    | CCDS8718.1  | C | D  | D  | D | D  |
| 12820 | 12 | 40786102  | C | A | 186  | D | Y | GLT8D3   | CCDS41771.1 | C | D  | D  | D | D  |
| 12820 | 14 | 23494101  | C | T | 49   | A | V | DHRS4    | CCDS9605.1  | C | D  | NA | D | D  |
| 12820 | 16 | 82741448  | G | T | 118  | G | C | LRRC50   | CCDS10943.2 | C | D  | D  | D | NA |
| 12820 | 17 | 2213567   | G | T | 244  | R | L | SGSM2    | CCDS32526.1 | C | D  | D  | D | D  |
| 12820 | 17 | 7519119   | T | C | 179  | H | R | TP53     | CCDS11118.1 | C | D  | D  | D | D  |
| 12820 | 18 | 21060321  | A | C | 520  | M | R | ZNF521   | CCDS32806.1 | C | T  | D  | D | D  |
| 12820 | 19 | 38955803  | T | A | 424  | Y | N | CHST8    | CCDS12433.1 | C | D  | D  | D | N  |
| 12820 | 19 | 44590416  | C | T | 73   | P | L | ZFP36    | CCDS12534.1 | C | D  | D  | N | D  |
| 12820 | 22 | 23228113  | G | A | 99   | R | H | UPB1     | CCDS13827.1 | C | D  | P  | D | D  |

|       |    |           |   |   |      |   |   |          |             |   |    |    |    |    |
|-------|----|-----------|---|---|------|---|---|----------|-------------|---|----|----|----|----|
| 12820 | 22 | 49024298  | C | A | 240  | D | Y | TUBGCP6  | CCDS14087.1 | C | D  | D  | D  | D  |
| 12820 | X  | 54337998  | G | T | 469  | S | Y | WNK3     | CCDS14357.1 | C | D  | D  | D  | N  |
| 12820 | X  | 85954789  | G | T | 464  | G | C | DACH2    | CCDS14455.1 | C | D  | D  | D  | D  |
| 12820 | X  | 110442549 | G | T | 416  | P | T | DCX      | CCDS14556.1 | C | D  | D  | D  | D  |
| 12924 | 1  | 33843582  | C | G | 2142 | G | A | CSMD2    | CCDS380.1   | C | D  | D  | D  | D  |
| 12924 | 1  | 36698961  | C | G | 102  | E | Q | MRPS15   | CCDS411.1   | C | T  | D  | D  | D  |
| 12924 | 1  | 39679531  | G | C | 4148 | E | Q | MACF1    | CCDS435.1   | C | D  | D  | D  | D  |
| 12924 | 1  | 67076055  | C | A | 503  | V | F | WDR78    | CCDS635.1   | C | D  | D  | D  | D  |
| 12924 | 1  | 103222316 | C | A | 841  | G | V | COL11A1  | CCDS778.1   | C | D  | NA | D  | D  |
| 12924 | 1  | 201406901 | T | A | 282  | N | Y | MYBPH    | CCDS30975.1 | C | D  | D  | D  | D  |
| 12924 | 2  | 15365868  | C | A | 1574 | A | S | NBAS     | CCDS1685.1  | C | D  | D  | D  | D  |
| 12924 | 2  | 15437394  | T | G | 1125 | S | R | NBAS     | CCDS1685.1  | C | T  | D  | D  | D  |
| 12924 | 2  | 71045120  | G | A | 396  | M | I | ATP6V1B1 | CCDS1912.1  | C | D  | D  | N  | D  |
| 12924 | 2  | 172530142 | C | A | 116  | P | Q | HAT1     | CCDS2245.1  | C | D  | D  | D  | D  |
| 12924 | 2  | 182251148 | G | A | 229  | P | S | NEUROD1  | CCDS2283.1  | C | T  | D  | D  | D  |
| 12924 | 2  | 201172637 | G | T | 120  | G | V | AOX1     | CCDS33360.1 | C | D  | D  | D  | NA |
| 12924 | 2  | 216001148 | C | G | 282  | G | R | FN1      | CCDS2399.1  | C | D  | D  | N  | D  |
| 12924 | 3  | 42702544  | G | T | 144  | D | Y | KBTBD5   | CCDS2703.1  | C | D  | D  | D  | D  |
| 12924 | 3  | 46374872  | G | T | 284  | D | Y | FLJ78302 | CCDS43078.1 | C | D  | D  | N  | D  |
| 12924 | 3  | 58343344  | A | T | 89   | I | L | PXK      | CCDS2889.1  | C | D  | P  | D  | D  |
| 12924 | 3  | 137528753 | C | A | 422  | A | E | PCCB     | CCDS3089.1  | C | D  | D  | D  | D  |
| 12924 | 3  | 198723629 | C | G | 189  | R | P | BDH1     | CCDS3328.1  | C | D  | D  | D  | D  |
| 12924 | 4  | 106578638 | C | A | 149  | W | L | PPA2     | CCDS3667.1  | C | D  | D  | D  | D  |
| 12924 | 4  | 126592756 | G | T | 3712 | S | I | FAT4     | CCDS3732.2  | C | D  | D  | U  | D  |
| 12924 | 4  | 164613809 | C | G | 176  | L | F | TKTL2    | CCDS3805.1  | C | D  | D  | D  | D  |
| 12924 | 5  | 152853684 | G | C | 29   | G | A | GRIA1    | CCDS4322.1  | C | T  | D  | D  | D  |
| 12924 | 5  | 161256710 | G | T | 359  | D | Y | GABRA1   | CCDS4357.1  | C | D  | B  | D  | D  |
| 12924 | 5  | 169466096 | G | T | 186  | R | L | FOXI1    | CCDS4372.1  | C | D  | D  | D  | D  |
| 12924 | 5  | 178977143 | C | G | 345  | M | I | HNRNPH1  | CCDS4446.1  | C | D  | D  | D  | D  |
| 12924 | 6  | 42345061  | C | A | 82   | Q | H | TRERF1   | CCDS4867.1  | C | D  | D  | D  | D  |
| 12924 | 6  | 70934808  | C | A | 841  | P | T | COL19A1  | CCDS4970.1  | C | T  | D  | D  | D  |
| 12924 | 6  | 94022361  | T | C | 763  | N | S | EPHA7    | CCDS5031.1  | C | D  | D  | D  | D  |
| 12924 | 6  | 132227718 | T | C | 319  | Y | H | ENPP1    | CCDS5150.1  | C | T  | D  | D  | D  |
| 12924 | 7  | 20749080  | G | T | 582  | R | L | ABCB5    | CCDS5371.1  | C | D  | D  | D  | D  |
| 12924 | 7  | 50564455  | G | C | 172  | P | R | DDC      | CCDS5511.1  | C | D  | D  | D  | D  |
| 12924 | 7  | 51062922  | C | A | 1122 | G | V | COBL     | CCDS34637.1 | C | D  | D  | D  | D  |
| 12924 | 7  | 91550779  | G | C | 2840 | L | F | AKAP9    | CCDS5622.1  | C | D  | D  | N  | D  |
| 12924 | 7  | 107429315 | C | T | 46   | R | Q | LAMB1    | CCDS5750.1  | C | D  | D  | NA | D  |
| 12924 | 7  | 128886638 | G | T | 462  | S | I | FAM40B   | CCDS34752.1 | C | D  | D  | D  | D  |
| 12924 | 8  | 12996689  | T | A | 1159 | E | V | DLC1     | CCDS5989.1  | C | D  | D  | D  | D  |
| 12924 | 8  | 73104745  | A | T | 961  | V | D | TRPA1    | CCDS34908.1 | C | NA | D  | D  | D  |
| 12924 | 8  | 107792181 | G | T | 506  | V | L | OXR1     | CCDS6304.1  | C | D  | D  | D  | D  |
| 12924 | 8  | 111054016 | C | A | 213  | G | V | KCNV1    | CCDS6314.1  | C | D  | P  | D  | D  |
| 12924 | 10 | 6546296   | T | A | 477  | D | V | PRKCQ    | CCDS7079.1  | C | D  | P  | D  | D  |
| 12924 | 10 | 69572807  | C | A | 336  | T | K | MYPN     | CCDS7275.1  | C | D  | D  | D  | D  |
| 12924 | 10 | 70695406  | C | A | 811  | T | K | HKDC1    | CCDS7288.1  | C | D  | D  | D  | D  |
| 12924 | 10 | 87474302  | C | G | 549  | E | Q | GRID1    | CCDS31236.1 | C | T  | D  | D  | D  |

|       |    |           |   |   |      |   |   |          |             |   |    |    |    |   |
|-------|----|-----------|---|---|------|---|---|----------|-------------|---|----|----|----|---|
| 12924 | 11 | 4747630   | G | T | 32   | P | T | OR51F1   | CCDS31359.1 | C | D  | D  | D  | N |
| 12924 | 11 | 5037138   | C | T | 99   | C | Y | OR52E2   | CCDS31371.1 | C | D  | D  | D  | D |
| 12924 | 11 | 36379333  | C | T | 29   | S | F | FLJ14213 | CCDS31463.1 | C | D  | D  | D  | D |
| 12924 | 11 | 65123444  | G | T | 735  | R | S | MAP3K11  | CCDS8107.1  | C | D  | P  | D  | D |
| 12924 | 11 | 75741084  | T | A | 253  | E | V | PRKRIR   | CCDS8243.1  | C | D  | D  | D  | D |
| 12924 | 11 | 88222759  | G | C | 292  | R | G | GRM5     | CCDS8283.1  | C | D  | D  | D  | D |
| 12924 | 11 | 88551511  | A | C | 248  | T | P | TYR      | CCDS8284.1  | C | D  | D  | D  | D |
| 12924 | 11 | 92354351  | G | T | 105  | G | V | MTNR1B   | CCDS8290.1  | C | D  | D  | D  | D |
| 12924 | 12 | 10133019  | A | T | 62   | L | Q | CLEC1A   | CCDS8612.1  | C | D  | D  | D  | D |
| 12924 | 12 | 15631135  | C | A | 1070 | T | N | PTPRO    | CCDS8674.1  | C | D  | D  | D  | D |
| 12924 | 12 | 38954937  | G | T | 606  | G | C | LRRK2    | CCDS31774.1 | C | D  | D  | D  | D |
| 12924 | 12 | 50570772  | T | A | 259  | Y | N | ANKRD33  | CCDS8815.1  | C | D  | NA | D  | D |
| 12924 | 12 | 70316946  | C | A | 629  | R | L | ZFC3H1   | CCDS41813.1 | C | NA | D  | D  | D |
| 12924 | 12 | 81775077  | G | A | 81   | G | R | TMTC2    | CCDS9025.1  | C | T  | D  | D  | D |
| 12924 | 12 | 99275387  | G | T | 29   | L | F | SLC17A8  | CCDS9077.1  | C | D  | D  | N  | D |
| 12924 | 12 | 109652806 | T | C | 110  | Y | C | PPP1CC   | CCDS9150.1  | C | D  | D  | D  | D |
| 12924 | 13 | 25049222  | G | A | 576  | M | I | ATP8A2   | CCDS41873.1 | C | D  | D  | D  | D |
| 12924 | 13 | 34947750  | A | C | 176  | C | G | MAB21L1  | CCDS9353.1  | C | D  | D  | D  | D |
| 12924 | 13 | 38348391  | G | T | 2806 | D | Y | FREM2    | CCDS31960.1 | C | D  | D  | D  | D |
| 12924 | 13 | 69212669  | G | T | 554  | P | T | KLHL1    | CCDS9445.1  | C | T  | D  | D  | D |
| 12924 | 13 | 100512332 | G | A | 1582 | R | C | NALCN    | CCDS9498.1  | C | D  | D  | D  | D |
| 12924 | 14 | 22956241  | G | A | 1494 | H | Y | MYH7     | CCDS9601.1  | C | D  | D  | NA | D |
| 12924 | 14 | 23915059  | G | C | 656  | K | N | NFATC4   | CCDS9629.1  | C | D  | B  | D  | D |
| 12924 | 14 | 50786021  | G | T | 192  | G | V | TMX1     | CCDS41953.1 | C | D  | D  | D  | D |
| 12924 | 14 | 69314997  | C | T | 250  | C | Y | SLC10A1  | CCDS9797.1  | C | T  | D  | D  | D |
| 12924 | 14 | 93113962  | G | T | 568  | G | C | KIAA1409 | CCDS9911.2  | C | T  | D  | D  | D |
| 12924 | 14 | 95883411  | C | A | 61   | E | D | ATG2B    | CCDS9944.2  | C | D  | D  | U  | D |
| 12924 | 15 | 23498271  | C | G | 882  | G | A | ATP10A   | CCDS32178.1 | C | NA | D  | D  | D |
| 12924 | 15 | 45840900  | C | G | 143  | P | A | SEMA6D   | CCDS32224.1 | C | D  | D  | D  | D |
| 12924 | 15 | 68766961  | C | A | 192  | D | Y | UACA     | CCDS10235.1 | C | D  | D  | N  | D |
| 12924 | 15 | 77542569  | C | G | 802  | L | V | KIAA1024 | CCDS32306.1 | C | T  | D  | D  | D |
| 12924 | 16 | 45175061  | C | T | 521  | D | N | SHCBP1   | CCDS10720.1 | C | D  | P  | D  | D |
| 12924 | 16 | 63564319  | G | T | 460  | A | E | CDH11    | CCDS10803.1 | C | D  | P  | D  | D |
| 12924 | 16 | 70699899  | G | T | 1049 | K | N | DHX38    | CCDS10907.1 | C | T  | D  | D  | D |
| 12924 | 16 | 70699900  | G | T | 1050 | D | Y | DHX38    | CCDS10907.1 | C | D  | D  | D  | D |
| 12924 | 17 | 69817009  | G | T | 412  | D | Y | DNAI2    | CCDS11697.1 | C | D  | D  | D  | D |
| 12924 | 18 | 7070396   | C | T | 41   | C | Y | LAMA1    | CCDS32787.1 | C | D  | D  | D  | D |
| 12924 | 18 | 30652190  | C | G | 258  | C | W | DTNA     | CCDS11908.1 | C | D  | D  | D  | D |
| 12924 | 19 | 3930985   | C | G | 476  | D | H | EEF2     | CCDS12117.1 | C | D  | D  | D  | D |
| 12924 | 19 | 10471422  | G | C | 96   | H | Q | KEAP1    | CCDS12239.1 | C | D  | D  | D  | D |
| 12924 | 19 | 12619281  | G | T | 932  | S | R | MAN2B1   | CCDS32919.1 | C | D  | D  | D  | D |
| 12924 | 19 | 18761034  | G | T | 155  | P | T | COMP     | CCDS12385.1 | C | D  | D  | U  | D |
| 12924 | 19 | 19232687  | C | T | 140  | R | H | HAPLN4   | CCDS12398.1 | C | T  | D  | D  | D |
| 12924 | 20 | 2359613   | T | A | 636  | V | E | TGM6     | CCDS13025.1 | C | D  | D  | N  | D |
| 12924 | 20 | 47297294  | C | T | 1892 | E | K | ZNF1     | CCDS13417.1 | C | D  | D  | D  | D |
| 12924 | 20 | 51305004  | G | T | 534  | G | W | TSHZ2    | CCDS33490.1 | C | D  | D  | D  | D |
| 12924 | 21 | 32960303  | C | G | 656  | D | H | SYNJ1    | CCDS33539.1 | C | D  | D  | D  | D |

|       |    |           |   |   |      |   |   |          |             |   |    |    |    |   |
|-------|----|-----------|---|---|------|---|---|----------|-------------|---|----|----|----|---|
| 12924 | 21 | 44212356  | C | A | 94   | L | I | AGPAT3   | CCDS13703.1 | C | D  | P  | D  | D |
| 12924 | 22 | 15452999  | G | T | 148  | P | T | CCT8L2   | CCDS13738.1 | C | D  | D  | U  | D |
| 12924 | 22 | 39079039  | G | T | 125  | R | I | ADSL     | CCDS14001.1 | C | D  | D  | D  | D |
| 12924 | X  | 46954012  | A | T | 662  | N | I | UBA1     | CCDS14275.1 | C | T  | D  | D  | D |
| 12924 | X  | 48535784  | C | A | 237  | Q | K | GATA1    | CCDS14305.1 | C | T  | D  | D  | D |
| 12924 | X  | 48535785  | A | G | 237  | Q | R | GATA1    | CCDS14305.1 | C | T  | D  | D  | D |
| 12924 | X  | 83258801  | C | G | 291  | G | A | RPS6KA6  | CCDS14451.1 | C | T  | D  | D  | D |
| 12924 | X  | 129346408 | C | T | 232  | G | E | GPR119   | CCDS14625.1 | C | D  | D  | D  | D |
| 13280 | 1  | 31210266  | C | A | 722  | S | I | PUM1     | CCDS338.1   | C | D  | D  | D  | D |
| 13280 | 1  | 35142875  | G | T | 233  | H | N | DLGAP3   | CCDS30670.1 | C | T  | D  | D  | D |
| 13280 | 1  | 71645761  | A | T | 341  | S | T | NEGR1    | CCDS661.1   | C | T  | D  | D  | D |
| 13280 | 1  | 153280704 | C | T | 247  | R | C | DCST1    | CCDS1083.1  | C | D  | D  | D  | D |
| 13280 | 1  | 178507237 | G | A | 184  | R | Q | LHX4     | CCDS1338.1  | C | D  | D  | D  | D |
| 13280 | 1  | 214917269 | G | A | 59   | P | S | ESRRG    | CCDS1517.1  | C | D  | D  | D  | D |
| 13280 | 2  | 39115934  | C | G | 333  | E | Q | SOS1     | CCDS1802.1  | C | T  | D  | D  | D |
| 13280 | 2  | 64175776  | T | C | 274  | E | G | PELI1    | CCDS1876.1  | C | T  | D  | D  | D |
| 13280 | 2  | 105258550 | G | C | 522  | R | G | TGFBRAP1 | CCDS2067.1  | C | T  | D  | D  | D |
| 13280 | 3  | 137452053 | G | A | 49   | G | E | PCCB     | CCDS3089.1  | C | D  | D  | D  | D |
| 13280 | 3  | 139598894 | C | T | 78   | R | W | MRAS     | CCDS3100.1  | C | D  | D  | D  | D |
| 13280 | 4  | 39085349  | G | A | 129  | D | N | KLB      | CCDS3451.1  | C | T  | D  | D  | D |
| 13280 | 4  | 175834929 | C | A | 268  | V | F | GLRA3    | CCDS3822.1  | C | D  | D  | D  | D |
| 13280 | 4  | 189161599 | G | T | 215  | R | L | ZFP42    | CCDS3849.1  | C | D  | D  | D  | D |
| 13280 | 5  | 14440669  | C | G | 1231 | F | L | TRIO     | CCDS3883.1  | C | D  | D  | D  | D |
| 13280 | 5  | 37373686  | C | T | 446  | M | I | NUP155   | CCDS3921.1  | C | T  | D  | D  | D |
| 13280 | 5  | 37373739  | C | T | 429  | D | N | NUP155   | CCDS3921.1  | C | D  | D  | D  | D |
| 13280 | 5  | 121215873 | G | T | 106  | V | L | FTMT     | CCDS4128.1  | C | D  | D  | N  | D |
| 13280 | 6  | 105836362 | G | A | 597  | T | I | PREP     | CCDS5053.1  | C | D  | D  | D  | D |
| 13280 | 7  | 75797441  | G | T | 45   | L | M | YWHAG    | CCDS5584.1  | C | D  | P  | D  | D |
| 13280 | 7  | 151566799 | G | A | 860  | P | S | MLL3     | CCDS5931.1  | C | D  | D  | D  | D |
| 13280 | 7  | 151566804 | C | A | 858  | W | L | MLL3     | CCDS5931.1  | C | D  | D  | D  | D |
| 13280 | 8  | 75389915  | C | A | 292  | G | V | JPH1     | CCDS6217.1  | C | D  | D  | D  | D |
| 13280 | 8  | 124264458 | G | A | 61   | D | N | FAM83A   | CCDS6339.1  | C | T  | D  | D  | D |
| 13280 | 9  | 89462824  | C | T | 629  | L | F | DAPK1    | CCDS43842.1 | C | D  | D  | D  | D |
| 13280 | 10 | 3145640   | G | T | 434  | R | L | PFKP     | CCDS7059.1  | C | D  | D  | D  | D |
| 13280 | 10 | 45227665  | G | C | 151  | G | A | ALOX5    | CCDS7212.1  | C | D  | P  | D  | D |
| 13280 | 11 | 14471812  | T | G | 148  | H | P | COPB1    | CCDS7815.1  | C | D  | D  | D  | D |
| 13280 | 11 | 33265498  | C | G | 321  | A | G | HIPK3    | CCDS7884.1  | C | D  | D  | D  | D |
| 13280 | 11 | 57728188  | C | A | 14   | M | I | OR1S2    | CCDS31545.1 | C | D  | D  | D  | N |
| 13280 | 11 | 57728189  | A | T | 14   | M | K | OR1S2    | CCDS31545.1 | C | D  | D  | D  | N |
| 13280 | 12 | 88521712  | C | G | 919  | R | T | ATP2B1   | CCDS9035.1  | C | D  | D  | D  | N |
| 13280 | 12 | 121569346 | G | A | 72   | R | C | RSRC2    | CCDS9234.1  | C | D  | NA | D  | D |
| 13280 | 13 | 38495234  | G | A | 200  | P | S | C13orf23 | CCDS9368.2  | C | D  | D  | NA | D |
| 13280 | 15 | 27796255  | C | T | 1352 | E | K | TJP1     | CCDS42007.1 | C | D  | D  | D  | D |
| 13280 | 15 | 50495705  | C | A | 181  | A | S | MYO5A    | CCDS42037.1 | C | D  | P  | D  | D |
| 13280 | 15 | 56072211  | A | T | 261  | F | Y | ALDH1A2  | CCDS10163.1 | C | D  | D  | D  | D |
| 13280 | 15 | 67122118  | C | G | 504  | F | L | NOX5     | CCDS32276.1 | C | NA | D  | D  | D |
| 13280 | 15 | 71676430  | A | G | 142  | I | T | NPTN     | CCDS10249.1 | C | D  | P  | D  | D |

|       |    |           |   |   |      |   |   |          |             |   |    |    |   |    |
|-------|----|-----------|---|---|------|---|---|----------|-------------|---|----|----|---|----|
| 13280 | 17 | 53407079  | C | A | 440  | M | I | VEZF1    | CCDS32687.1 | C | D  | NA | D | D  |
| 13280 | 17 | 71264738  | G | A | 1725 | G | R | ITGB4    | CCDS11727.1 | C | D  | D  | D | D  |
| 13280 | 17 | 71459246  | C | G | 318  | E | Q | ACOX1    | CCDS11734.1 | C | D  | D  | D | D  |
| 13280 | 19 | 3604520   | C | T | 230  | G | D | PIP5K1C  | CCDS32872.1 | C | D  | P  | D | D  |
| 13280 | 19 | 53525454  | G | A | 136  | G | E | EMP3     | CCDS12715.1 | C | D  | D  | D | D  |
| 13280 | 20 | 33335408  | C | A | 60   | G | W | EIF6     | CCDS13249.1 | C | D  | D  | D | D  |
| 13280 | 20 | 36073739  | C | G | 632  | E | Q | KIAA0406 | CCDS13300.1 | C | D  | D  | D | D  |
| 13280 | X  | 23321754  | C | G | 733  | S | C | PTCHD1   | CCDS35215.2 | C | D  | D  | D | D  |
| 13280 | X  | 46836452  | G | T | 248  | C | F | RGN      | CCDS14272.1 | C | D  | D  | D | D  |
| 13280 | X  | 71789183  | G | T | 394  | P | H | PHKA1    | CCDS14421.1 | C | D  | P  | D | D  |
| 13280 | X  | 117584044 | T | G | 248  | Y | D | DOCK11   | CCDS35373.1 | C | T  | D  | D | D  |
| 13280 | X  | 117584105 | A | T | 268  | K | I | DOCK11   | CCDS35373.1 | C | D  | P  | D | D  |
| 13394 | 1  | 33962809  | C | A | 887  | A | S | CSMD2    | CCDS380.1   | C | T  | D  | D | D  |
| 13394 | 1  | 159309233 | C | T | 459  | E | K | PVRL4    | CCDS1216.1  | C | D  | D  | D | N  |
| 13394 | 1  | 196163523 | G | T | 305  | G | C | LHX9     | CCDS1393.1  | C | D  | D  | D | D  |
| 13394 | 1  | 202670253 | T | C | 1208 | H | R | PIK3C2B  | CCDS1446.1  | C | D  | D  | D | D  |
| 13394 | 3  | 10836397  | G | T | 131  | G | V | SLC6A11  | CCDS2602.1  | C | D  | P  | D | D  |
| 13394 | 3  | 66532150  | A | G | 389  | L | P | LRIG1    | CCDS33783.1 | C | D  | D  | D | D  |
| 13394 | 3  | 99592638  | G | C | 147  | G | R | OR5K3    | CCDS33803.1 | C | D  | D  | N | D  |
| 13394 | 4  | 125811277 | G | T | 869  | Q | K | ANKRD50  | CCDS34060.1 | C | T  | D  | D | D  |
| 13394 | 6  | 3977676   | C | T | 309  | S | F | PRPF4B   | CCDS4488.1  | C | D  | P  | D | D  |
| 13394 | 6  | 112496248 | T | C | 264  | L | P | WISP3    | CCDS5097.1  | C | D  | D  | D | D  |
| 13394 | 7  | 34061306  | A | G | 265  | T | A | BMPER    | CCDS5442.1  | C | D  | D  | D | D  |
| 13394 | 8  | 89137533  | C | A | 438  | G | C | MMP16    | CCDS6246.1  | C | D  | P  | D | D  |
| 13394 | 10 | 50526646  | C | A | 457  | L | M | CHAT     | CCDS7232.1  | C | D  | P  | D | D  |
| 13394 | 10 | 89675267  | A | G | 61   | H | R | PTEN     | CCDS31238.1 | C | D  | D  | D | D  |
| 13394 | 12 | 38043241  | G | C | 315  | S | R | KIF21A   | CCDS31773.1 | C | D  | B  | D | D  |
| 13394 | 15 | 71963581  | G | C | 103  | K | N | TBC1D21  | CCDS10252.1 | C | T  | D  | D | D  |
| 13394 | 15 | 83207845  | G | T | 1692 | R | L | ALPK3    | CCDS10333.1 | C | D  | D  | D | D  |
| 13394 | 16 | 80590705  | G | C | 232  | H | D | SDR42E1  | CCDS42205.1 | C | T  | D  | D | D  |
| 13394 | 22 | 37554250  | C | T | 280  | E | K | NPTXR    | CCDS33647.1 | C | D  | P  | D | D  |
| 13542 | 1  | 57383576  | C | A | 61   | C | F | DAB1     | CCDS607.1   | C | D  | D  | D | D  |
| 13542 | 1  | 70030416  | G | C | 98   | D | H | LRRC7    | CCDS645.1   | C | D  | D  | D | D  |
| 13542 | 2  | 86622901  | C | G | 31   | D | H | VPS24    | CCDS33236.1 | C | D  | D  | D | NA |
| 13542 | 2  | 168732055 | C | A | 144  | G | C | STK39    | CCDS42770.1 | C | D  | D  | D | D  |
| 13542 | 3  | 42704789  | A | G | 435  | Y | C | KBTBD5   | CCDS2703.1  | C | D  | D  | N | D  |
| 13542 | 4  | 985294    | G | A | 178  | E | K | IDUA     | CCDS3343.1  | C | D  | D  | D | D  |
| 13542 | 4  | 985327    | G | C | 189  | D | H | IDUA     | CCDS3343.1  | C | D  | D  | D | D  |
| 13542 | 5  | 159613198 | C | A | 358  | R | L | CCNJL    | CCDS4350.2  | C | D  | D  | N | D  |
| 13542 | 6  | 31936332  | C | A | 221  | G | W | NEU1     | CCDS4723.1  | C | D  | D  | D | D  |
| 13542 | 6  | 33516680  | C | T | 610  | L | F | SYNGAP1  | CCDS34434.1 | C | D  | D  | D | D  |
| 13542 | 6  | 97160504  | C | G | 114  | R | G | FHL5     | CCDS5035.1  | C | D  | D  | D | D  |
| 13542 | 7  | 143288843 | C | A | 283  | P | T | OR2F1    | CCDS5887.1  | C | NA | D  | D | D  |
| 13542 | 8  | 87752363  | G | A | 140  | R | C | CNGB3    | CCDS6244.1  | C | D  | D  | N | D  |
| 13542 | 8  | 105430329 | A | T | 125  | M | L | TM7SF4   | CCDS6301.1  | C | D  | D  | D | N  |
| 13542 | 8  | 113767075 | C | A | 740  | G | W | CSMD3    | CCDS6315.1  | C | D  | D  | D | D  |
| 13542 | 8  | 142223524 | C | G | 160  | P | R | DENND3   | CCDS34947.1 | C | T  | D  | D | D  |

|       |    |           |   |   |      |   |   |         |             |   |    |    |    |   |
|-------|----|-----------|---|---|------|---|---|---------|-------------|---|----|----|----|---|
| 13542 | 9  | 71931050  | G | A | 267  | D | N | MAMDC2  | CCDS6631.1  | C | T  | D  | D  | D |
| 13542 | 9  | 83392541  | C | G | 618  | G | R | TLE1    | CCDS6661.1  | C | D  | D  | D  | D |
| 13542 | 11 | 5418743   | T | C | 193  | D | G | OR51I1  | CCDS31382.1 | C | D  | D  | D  | N |
| 13542 | 11 | 59028208  | T | A | 195  | L | H | OR4D11  | CCDS31563.1 | C | D  | P  | D  | D |
| 13542 | 11 | 105294748 | A | G | 457  | H | R | GRIA4   | CCDS8333.1  | C | T  | D  | D  | D |
| 13542 | 12 | 48550649  | G | T | 286  | P | T | FAIM2   | CCDS8791.1  | C | D  | D  | D  | D |
| 13542 | 12 | 51171213  | C | T | 256  | E | K | KRT6A   | CCDS41786.1 | C | D  | D  | D  | D |
| 13542 | 12 | 131860882 | A | T | 1414 | L | Q | GOLGA3  | CCDS9281.1  | C | D  | D  | D  | D |
| 13542 | 17 | 55898480  | T | C | 209  | Y | C | APPBP2  | CCDS32699.1 | C | D  | B  | D  | D |
| 13542 | X  | 153247933 | G | T | 389  | P | T | FLNA    | CCDS44021.1 | C | D  | D  | D  | D |
| 13681 | 1  | 62485813  | C | A | 934  | M | I | KANK4   | CCDS620.1   | C | D  | D  | D  | D |
| 13681 | 1  | 100700908 | G | A | 241  | G | S | CDC14A  | CCDS769.1   | C | D  | B  | D  | D |
| 13681 | 1  | 100700909 | G | T | 241  | G | V | CDC14A  | CCDS769.1   | C | D  | P  | D  | D |
| 13681 | 1  | 154372508 | C | T | 377  | R | C | LMNA    | CCDS1129.1  | C | D  | D  | D  | D |
| 13681 | 2  | 141176267 | C | T | 2072 | G | E | LRP1B   | CCDS2182.1  | C | D  | D  | U  | D |
| 13681 | 3  | 4998105   | T | C | 96   | V | A | BHLHE40 | CCDS2565.1  | C | D  | D  | D  | D |
| 13681 | 4  | 134303714 | G | T | 977  | G | V | PCDH10  | CCDS34063.1 | C | D  | D  | N  | D |
| 13681 | 5  | 158182846 | T | C | 232  | M | V | EBF1    | CCDS4343.1  | C | D  | D  | D  | D |
| 13681 | 9  | 79175162  | G | T | 2919 | G | C | VPS13A  | CCDS6655.1  | C | D  | D  | D  | D |
| 13681 | 11 | 21207543  | C | A | 506  | P | T | NELL1   | CCDS7855.1  | C | D  | D  | D  | D |
| 13681 | 11 | 85074415  | A | G | 136  | M | T | CCDC89  | CCDS8270.1  | C | D  | D  | D  | N |
| 13681 | 12 | 25289552  | C | A | 12   | G | C | KRAS    | CCDS8702.1  | C | D  | B  | D  | D |
| 13681 | 12 | 51452881  | C | A | 309  | D | Y | KRT76   | CCDS8838.1  | C | D  | D  | N  | D |
| 13681 | 12 | 108159425 | A | T | 1507 | N | Y | ACACB   | CCDS31898.1 | C | D  | D  | D  | D |
| 13681 | 19 | 10463584  | C | A | 332  | G | C | KEAP1   | CCDS12239.1 | C | D  | D  | D  | D |
| 13681 | 19 | 41419571  | G | T | 130  | C | F | ZNF146  | CCDS12492.1 | C | D  | D  | D  | D |
| 13681 | 22 | 22890510  | A | T | 1630 | Q | L | CABIN1  | CCDS13823.1 | C | D  | D  | D  | D |
| 13681 | X  | 47315314  | T | G | 549  | C | G | ARAF    | CCDS35232.1 | C | D  | D  | D  | D |
| 13681 | X  | 117698648 | T | C | 1879 | I | T | DOCK11  | CCDS35373.1 | C | D  | B  | D  | D |
| 13681 | X  | 149390076 | G | T | 525  | G | W | MAMLD1  | CCDS14693.2 | C | D  | D  | N  | D |
| 13681 | X  | 149663569 | C | A | 510  | Q | K | MTMR1   | CCDS14695.1 | C | D  | D  | D  | D |
| 13681 | X  | 153597761 | C | A | 37   | R | L | GAB3    | CCDS14760.1 | C | D  | D  | D  | D |
| 15145 | 1  | 8606966   | T | A | 129  | D | V | RERE    | CCDS95.1    | C | D  | D  | NA | D |
| 15145 | 2  | 44282483  | G | T | 214  | G | V | PPM1B   | CCDS1816.1  | C | D  | P  | D  | D |
| 15145 | 3  | 39144894  | C | T | 539  | H | Y | TTC21A  | CCDS43068.1 | C | NA | D  | D  | D |
| 15145 | 3  | 88288137  | G | T | 216  | D | Y | C3orf38 | CCDS2921.1  | C | D  | D  | D  | D |
| 15145 | 3  | 89563128  | G | T | 759  | V | L | EPHA3   | CCDS2922.1  | C | D  | D  | D  | D |
| 15145 | 3  | 113187806 | A | T | 111  | D | V | ABHD10  | CCDS2963.1  | C | D  | D  | D  | D |
| 15145 | 6  | 151334791 | G | C | 677  | V | L | MTHFD1L | CCDS5228.1  | C | D  | P  | D  | D |
| 15145 | 7  | 31344768  | G | C | 214  | P | A | NEUROD6 | CCDS5434.1  | C | T  | D  | D  | D |
| 15145 | 8  | 113726543 | G | T | 1094 | T | K | CSMD3   | CCDS6315.1  | C | T  | D  | D  | D |
| 15145 | 9  | 103356132 | A | T | 648  | D | V | RNF20   | CCDS35084.1 | C | D  | D  | D  | D |
| 15145 | 12 | 6529236   | G | A | 340  | L | F | IFFO1   | CCDS8550.1  | C | D  | D  | D  | D |
| 15145 | 13 | 109890146 | G | T | 308  | G | C | COL4A2  | CCDS41907.1 | C | D  | NA | D  | D |
| 15145 | 22 | 27958281  | G | A | 238  | G | E | EMID1   | CCDS33630.1 | C | NA | D  | D  | D |
| 15145 | X  | 49029868  | A | C | 591  | E | A | PPP1R3F | CCDS35254.1 | C | D  | D  | D  | N |
| 15145 | X  | 65325018  | C | A | 240  | H | N | HEPH    | CCDS14384.1 | C | D  | D  | D  | N |

|       |    |           |   |   |      |   |   |           |             |   |   |   |    |    |
|-------|----|-----------|---|---|------|---|---|-----------|-------------|---|---|---|----|----|
| 15145 | X  | 152639620 | A | G | 32   | W | R | BCAP31    | CCDS14727.1 | C | D | D | D  | D  |
| 15145 | X  | 152658777 | A | G | 509  | N | S | ABCD1     | CCDS14728.1 | C | D | D | D  | D  |
| 15822 | 2  | 172358391 | G | C | 480  | L | V | SLC25A12  | CCDS33327.1 | C | D | P | D  | D  |
| 15822 | 17 | 7623316   | A | C | 1858 | N | H | DNAH2     | CCDS32551.1 | C | D | D | D  | D  |
| 15858 | 1  | 202670334 | C | A | 1181 | C | F | PIK3C2B   | CCDS1446.1  | C | D | D | D  | D  |
| 15858 | 2  | 71724639  | G | T | 1483 | A | S | DYSF      | CCDS1918.1  | C | T | D | D  | D  |
| 15858 | 3  | 141764424 | G | T | 765  | R | L | CLSTN2    | CCDS3112.1  | C | D | D | D  | D  |
| 15858 | 3  | 187820392 | T | A | 243  | V | D | AHSG      | CCDS3278.1  | C | D | D | N  | D  |
| 15858 | 12 | 37333973  | T | G | 558  | H | P | CPNE8     | CCDS8733.1  | C | T | D | D  | D  |
| 15858 | 12 | 48635477  | C | A | 212  | A | D | AQP2      | CCDS8792.1  | C | D | D | D  | D  |
| 15858 | 14 | 75702821  | A | T | 242  | Q | L | C14orf118 | CCDS9848.1  | C | D | D | D  | N  |
| 15858 | 14 | 95002088  | G | T | 187  | P | H | C14orf49  | CCDS9935.1  | C | D | D | N  | D  |
| 15858 | 20 | 51305578  | C | A | 725  | T | K | TSHZ2     | CCDS33490.1 | C | D | P | D  | D  |
| 16246 | 1  | 11172359  | T | A | 46   | C | S | ANGPTL7   | CCDS128.1   | C | T | D | D  | D  |
| 16246 | 1  | 20121760  | T | C | 39   | Y | C | PLA2G2E   | CCDS200.1   | C | D | D | D  | D  |
| 16246 | 1  | 114325516 | G | T | 275  | D | Y | OLFML3    | CCDS870.1   | C | D | D | D  | D  |
| 16246 | 1  | 152380601 | C | A | 166  | G | W | NUP210L   | CCDS41399.1 | C | D | D | D  | D  |
| 16246 | 1  | 161012090 | G | T | 627  | K | N | DDR2      | CCDS1241.1  | C | D | D | D  | D  |
| 16246 | 1  | 161383898 | G | T | 135  | T | N | RGS5      | CCDS1244.1  | C | D | D | D  | D  |
| 16246 | 1  | 164306292 | A | T | 199  | V | E | FAM78B    | CCDS30931.1 | C | D | P | D  | D  |
| 16246 | 1  | 213858926 | G | C | 546  | R | S | KCTD3     | CCDS1515.1  | C | D | D | D  | D  |
| 16246 | 1  | 238138096 | A | T | 241  | Y | F | CHRM3     | CCDS1616.1  | C | D | D | D  | D  |
| 16246 | 3  | 1418203   | A | T | 931  | N | Y | CNTN6     | CCDS2557.1  | C | D | D | D  | D  |
| 16246 | 3  | 12831847  | G | T | 312  | R | L | CAND2     | CCDS43053.1 | C | D | D | N  | D  |
| 16246 | 3  | 106953126 | C | A | 198  | R | I | CBLB      | CCDS2948.1  | C | D | D | D  | D  |
| 16246 | 3  | 187878205 | C | T | 473  | P | S | HRG       | CCDS3280.1  | C | D | D | D  | N  |
| 16246 | 4  | 123570238 | C | A | 542  | S | Y | ADAD1     | CCDS34058.1 | C | T | D | D  | D  |
| 16246 | 4  | 155726563 | C | A | 490  | D | Y | FGA       | CCDS3787.1  | C | D | D | N  | D  |
| 16246 | 4  | 177308239 | G | T | 724  | R | I | WDR17     | CCDS3825.1  | C | D | P | D  | D  |
| 16246 | 5  | 31352193  | G | T | 504  | Q | H | CDH6      | CCDS3894.1  | C | D | D | D  | NA |
| 16246 | 5  | 33719744  | A | T | 270  | Y | N | ADAMTS12  | CCDS34140.1 | C | D | D | D  | N  |
| 16246 | 5  | 71526425  | A | G | 496  | Y | C | MAP1B     | CCDS4012.1  | C | T | D | D  | D  |
| 16246 | 5  | 114888617 | T | A | 381  | S | C | FEM1C     | CCDS4118.1  | C | D | D | D  | D  |
| 16246 | 5  | 140328836 | G | T | 767  | R | S | PCDHAC2   | CCDS4242.1  | C | T | D | D  | D  |
| 16246 | 6  | 36149470  | C | G | 148  | H | D | MAPK14    | CCDS4815.1  | C | D | D | D  | D  |
| 16246 | 7  | 81177454  | C | G | 496  | V | L | HGF       | CCDS5597.1  | C | D | P | D  | D  |
| 16246 | 7  | 92663108  | A | G | 403  | V | A | HEPACAM2  | CCDS5629.1  | C | D | D | D  | D  |
| 16246 | 8  | 22221497  | G | T | 551  | R | L | PIWIL2    | CCDS6029.1  | C | T | D | D  | D  |
| 16246 | 9  | 105925235 | G | A | 720  | E | K | SMC2      | CCDS35086.1 | C | D | P | D  | D  |
| 16246 | 9  | 120970102 | A | T | 456  | L | Q | DBC1      | CCDS6822.1  | C | D | B | D  | D  |
| 16246 | 10 | 55368593  | C | A | 1121 | V | F | PCDH15    | CCDS7248.1  | C | D | D | NA | D  |
| 16246 | 10 | 62322690  | C | A | 122  | W | C | RHOBTB1   | CCDS7261.1  | C | D | D | D  | D  |
| 16246 | 10 | 82321273  | G | T | 152  | A | S | SH2D4B    | CCDS7370.1  | C | T | D | D  | D  |
| 16246 | 10 | 96084464  | A | G | 731  | S | P | NOC3L     | CCDS7433.1  | C | D | B | D  | D  |
| 16246 | 11 | 22354755  | G | T | 458  | M | I | SLC17A6   | CCDS7856.1  | C | T | D | D  | D  |
| 16246 | 11 | 55175707  | C | A | 251  | P | H | OR4S2     | CCDS31505.1 | C | D | D | D  | N  |
| 16246 | 11 | 55814264  | A | T | 284  | L | Q | OR8H1     | CCDS31526.1 | C | D | D | D  | N  |



|       |    |           |   |   |      |   |   |          |             |   |    |   |    |   |
|-------|----|-----------|---|---|------|---|---|----------|-------------|---|----|---|----|---|
| 16246 | 11 | 61915584  | G | T | 209  | A | S | ASRGL1   | CCDS8019.1  | C | D  | D | D  | D |
| 16246 | 12 | 21856355  | T | A | 1369 | K | I | ABCC9    | CCDS8693.1  | C | D  | P | D  | D |
| 16246 | 12 | 65074318  | C | A | 637  | G | V | GRIP1    | CCDS41807.1 | C | D  | D | D  | D |
| 16246 | 12 | 108714849 | C | G | 605  | M | I | TRPV4    | CCDS9134.1  | C | D  | D | D  | D |
| 16246 | 12 | 119076079 | G | T | 1240 | A | D | GCN1L1   | CCDS41847.1 | C | NA | D | D  | D |
| 16246 | 13 | 42832012  | C | A | 188  | M | I | ENOX1    | CCDS9389.1  | C | T  | D | D  | D |
| 16246 | 13 | 52317664  | G | C | 912  | F | L | PCDH8    | CCDS9438.1  | C | T  | D | D  | D |
| 16246 | 13 | 57196798  | C | A | 950  | S | Y | PCDH17   | CCDS31986.1 | C | D  | D | D  | N |
| 16246 | 13 | 111770173 | G | C | 67   | R | P | SOX1     | CCDS9523.1  | C | D  | D | U  | D |
| 16246 | 13 | 113336326 | G | T | 199  | A | S | TFDP1    | CCDS9538.1  | C | T  | D | D  | D |
| 16246 | 14 | 62958477  | C | A | 148  | W | L | PPP2R5E  | CCDS9758.1  | C | D  | D | D  | D |
| 16246 | 14 | 63533554  | T | C | 1026 | I | T | SYNE2    | CCDS9761.2  | C | D  | D | N  | D |
| 16246 | 14 | 88053316  | G | A | 75   | R | C | PTPN21   | CCDS9884.1  | C | T  | D | D  | D |
| 16246 | 14 | 93149139  | G | T | 1156 | R | L | KIAA1409 | CCDS9911.2  | C | D  | D | D  | D |
| 16246 | 14 | 104810121 | G | A | 141  | R | C | BRF1     | CCDS10001.1 | C | D  | D | D  | D |
| 16246 | 15 | 41608887  | C | T | 2642 | R | W | MAP1A    | CCDS42031.1 | C | D  | D | NA | D |
| 16246 | 15 | 48337979  | G | T | 78   | H | N | HDC      | CCDS10134.1 | C | T  | D | D  | D |
| 16246 | 15 | 98620146  | C | A | 269  | Q | H | ADAMTS17 | CCDS10383.1 | C | T  | D | D  | D |
| 16246 | 16 | 63539408  | C | G | 664  | D | H | CDH11    | CCDS10803.1 | C | D  | D | D  | D |
| 16246 | 16 | 82681999  | T | A | 338  | N | I | MBTPS1   | CCDS10941.1 | C | D  | D | D  | D |
| 16246 | 16 | 84370919  | T | A | 177  | S | C | COX4NB   | CCDS10954.1 | C | D  | D | D  | D |
| 16246 | 17 | 52689481  | G | T | 29   | S | I | MSI2     | CCDS11596.1 | C | D  | D | U  | D |
| 16246 | 18 | 62362396  | C | A | 336  | V | F | CDH19    | CCDS11994.1 | C | D  | D | D  | N |
| 16246 | 19 | 2071963   | G | A | 460  | S | F | AP3D1    | CCDS42459.1 | C | D  | P | D  | D |
| 16246 | 20 | 13788008  | G | T | 573  | T | K | SEL1L2   | CCDS42852.1 | C | T  | D | D  | D |
| 16246 | 20 | 57032325  | C | G | 150  | L | V | TUBB1    | CCDS13475.1 | C | D  | P | D  | D |
| 16246 | X  | 22042611  | G | C | 430  | D | H | PHEX     | CCDS14204.1 | C | D  | D | D  | D |
| 16246 | X  | 31406308  | A | T | 465  | W | R | DMD      | CCDS14228.1 | C | D  | D | U  | D |
| 16246 | X  | 78504837  | G | T | 150  | T | N | ITM2A    | CCDS14444.1 | C | D  | D | D  | D |
| 16461 | 1  | 23641615  | C | A | 184  | R | I | ASAP3    | CCDS235.1   | C | D  | D | D  | D |
| 16461 | 1  | 33771372  | C | A | 3202 | G | W | CSMD2    | CCDS380.1   | C | D  | D | D  | D |
| 16461 | 1  | 44194878  | T | C | 341  | M | T | IPO13    | CCDS503.1   | C | D  | D | D  | D |
| 16461 | 1  | 65006966  | T | A | 97   | C | S | RAVER2   | CCDS41345.1 | C | D  | D | D  | D |
| 16461 | 1  | 78181025  | G | C | 651  | E | Q | NEXN     | CCDS41351.1 | C | D  | D | D  | D |
| 16461 | 1  | 84420489  | G | C | 43   | D | H | PRKACB   | CCDS691.1   | C | D  | B | D  | D |
| 16461 | 1  | 148187543 | T | A | 397  | K | M | OTUD7B   | CCDS41389.1 | C | D  | B | D  | D |
| 16461 | 1  | 149662617 | C | G | 520  | D | H | POGZ     | CCDS997.1   | C | D  | D | D  | D |
| 16461 | 1  | 167750274 | G | T | 2192 | F | L | F5       | CCDS1281.1  | C | T  | D | D  | D |
| 16461 | 1  | 175265395 | C | A | 373  | R | I | ASTN1    | CCDS1319.1  | C | T  | D | D  | D |
| 16461 | 1  | 180812038 | T | A | 672  | H | L | RNASEL   | CCDS1347.1  | C | D  | D | D  | D |
| 16461 | 1  | 181339370 | G | T | 235  | D | Y | LAMC1    | CCDS1351.1  | C | D  | D | D  | D |
| 16461 | 1  | 195665224 | G | T | 900  | G | V | CRB1     | CCDS1390.1  | C | D  | D | NA | D |
| 16461 | 1  | 200106381 | A | C | 727  | Q | H | IPO9     | CCDS1415.1  | C | D  | D | D  | D |
| 16461 | 1  | 201012799 | G | A | 84   | T | M | JARID1B  | CCDS30974.1 | C | D  | D | D  | D |
| 16461 | 1  | 239098706 | G | T | 174  | Q | K | RGS7     | CCDS31071.1 | C | D  | P | D  | D |
| 16461 | 2  | 9493915   | G | T | 245  | R | M | CPSF3    | CCDS1664.1  | C | D  | D | D  | D |
| 16461 | 2  | 31032074  | C | T | 190  | A | T | GALNT14  | CCDS1773.2  | C | D  | D | D  | D |

|       |    |           |   |   |      |   |   |          |             |   |    |    |   |    |
|-------|----|-----------|---|---|------|---|---|----------|-------------|---|----|----|---|----|
| 16461 | 2  | 39746692  | C | A | 25   | A | D | TMEM178  | CCDS1804.1  | C | D  | P  | D | D  |
| 16461 | 2  | 104839461 | T | A | 354  | V | E | POU3F3   | CCDS33265.1 | C | D  | D  | U | D  |
| 16461 | 2  | 116227290 | C | A | 334  | Q | K | DPP10    | CCDS33278.1 | C | D  | D  | D | D  |
| 16461 | 2  | 141174422 | C | A | 2222 | K | N | LRP1B    | CCDS2182.1  | C | D  | D  | U | D  |
| 16461 | 2  | 220079305 | C | T | 360  | P | L | GMPPA    | CCDS2441.1  | C | T  | D  | D | D  |
| 16461 | 3  | 7696961   | T | A | 893  | C | S | GRM7     | CCDS2567.1  | C | D  | D  | D | D  |
| 16461 | 3  | 9388215   | G | A | 268  | V | M | THUMPD3  | CCDS2573.1  | C | D  | D  | D | D  |
| 16461 | 3  | 27734163  | C | A | 488  | R | L | EOMES    | CCDS2646.1  | C | D  | D  | N | D  |
| 16461 | 3  | 43616949  | T | C | 90   | K | E | ANO10    | CCDS2710.2  | C | D  | D  | D | N  |
| 16461 | 3  | 47274025  | C | T | 337  | M | I | KIF9     | CCDS2751.1  | C | T  | D  | D | D  |
| 16461 | 3  | 69133464  | T | A | 238  | M | L | C3orf64  | CCDS2908.1  | C | T  | D  | D | D  |
| 16461 | 3  | 114996650 | G | T | 379  | G | C | ATP6V1A  | CCDS2976.1  | C | D  | D  | D | D  |
| 16461 | 3  | 121008984 | G | T | 105  | R | M | NR112    | CCDS2995.1  | C | D  | D  | D | NA |
| 16461 | 3  | 132776642 | A | C | 297  | L | W | CPNE4    | CCDS3072.1  | C | D  | D  | D | D  |
| 16461 | 3  | 185365290 | A | G | 159  | N | S | DVL3     | CCDS3253.1  | C | T  | D  | D | D  |
| 16461 | 4  | 1331974   | G | T | 32   | C | F | KIAA1530 | CCDS33938.1 | C | D  | D  | D | D  |
| 16461 | 4  | 56457800  | T | G | 705  | L | R | EXOC1    | CCDS3502.1  | C | D  | P  | D | D  |
| 16461 | 4  | 57571330  | G | T | 484  | R | L | POLR2B   | CCDS3511.1  | C | D  | D  | D | D  |
| 16461 | 4  | 68885405  | G | C | 273  | S | C | YTHDC1   | CCDS3522.2  | C | D  | NA | D | D  |
| 16461 | 4  | 89602386  | C | A | 182  | P | T | HERC5    | CCDS3630.1  | C | D  | D  | D | D  |
| 16461 | 4  | 151373357 | A | C | 498  | N | T | DCLK2    | CCDS34076.1 | C | D  | D  | D | D  |
| 16461 | 4  | 166440254 | C | G | 306  | P | R | KLHL2    | CCDS34094.1 | C | NA | D  | D | D  |
| 16461 | 5  | 38524973  | C | G | 767  | E | Q | LIFR     | CCDS3927.1  | C | D  | D  | D | D  |
| 16461 | 5  | 50156547  | G | A | 637  | A | T | PARP8    | CCDS3954.1  | C | D  | P  | D | D  |
| 16461 | 5  | 56210598  | G | T | 667  | C | F | MAP3K1   | CCDS43318.1 | C | NA | D  | D | D  |
| 16461 | 5  | 147908544 | G | A | 78   | A | V | HTR4     | CCDS4291.1  | C | D  | P  | D | D  |
| 16461 | 6  | 3171032   | G | T | 97   | A | D | TUBB2B   | CCDS4485.1  | C | D  | D  | D | D  |
| 16461 | 6  | 32038283  | G | T | 385  | G | W | SKIV2L   | CCDS4731.1  | C | D  | D  | D | D  |
| 16461 | 6  | 94177383  | G | A | 130  | T | I | EPHA7    | CCDS5031.1  | C | D  | D  | D | D  |
| 16461 | 6  | 147676751 | A | T | 395  | H | L | STXBP5   | CCDS5211.1  | C | D  | D  | D | D  |
| 16461 | 7  | 36412459  | C | T | 211  | S | F | ANLN     | CCDS5447.1  | C | D  | D  | D | D  |
| 16461 | 7  | 45716690  | G | C | 991  | A | P | ADCY1    | CCDS34631.1 | C | NA | D  | D | D  |
| 16461 | 7  | 77217048  | G | T | 359  | A | S | RSBN1L   | CCDS43607.1 | C | D  | NA | D | D  |
| 16461 | 7  | 89765052  | G | T | 610  | G | V | C7orf63  | CCDS43613.1 | C | NA | D  | D | D  |
| 16461 | 7  | 90422981  | C | T | 269  | T | I | PFTK1    | CCDS5619.1  | C | D  | P  | D | D  |
| 16461 | 7  | 95272032  | G | T | 19   | A | S | DYNC111  | CCDS5644.1  | C | D  | P  | D | D  |
| 16461 | 7  | 107607974 | T | A | 911  | N | I | NRCAM    | CCDS5751.1  | C | D  | D  | D | D  |
| 16461 | 7  | 133783782 | C | T | 186  | E | K | AKR1B1   | CCDS5831.1  | C | D  | P  | D | D  |
| 16461 | 8  | 103379883 | C | T | 1113 | G | R | UBR5     | CCDS34933.1 | C | D  | B  | D | D  |
| 16461 | 8  | 139675499 | G | A | 1520 | P | S | COL22A1  | CCDS6376.1  | C | D  | D  | D | D  |
| 16461 | 8  | 139902637 | A | T | 390  | I | N | COL22A1  | CCDS6376.1  | C | D  | D  | N | D  |
| 16461 | 9  | 8309927   | G | T | 1845 | S | R | PTPRD    | CCDS6472.1  | C | D  | D  | D | D  |
| 16461 | 9  | 72669189  | G | T | 79   | P | H | TRPM3    | CCDS43835.1 | C | D  | P  | D | D  |
| 16461 | 9  | 100870706 | G | T | 1296 | G | C | COL15A1  | CCDS35081.1 | C | D  | D  | D | D  |
| 16461 | 9  | 130795698 | A | T | 974  | Y | F | NUP188   | CCDS35156.1 | C | T  | D  | D | D  |
| 16461 | 10 | 23522689  | C | A | 279  | H | N | PTF1A    | CCDS7143.1  | C | D  | D  | D | D  |
| 16461 | 10 | 34688211  | T | C | 646  | N | S | PARD3    | CCDS7178.1  | C | D  | P  | D | D  |

|       |    |           |   |   |      |   |   |          |             |   |    |    |   |    |
|-------|----|-----------|---|---|------|---|---|----------|-------------|---|----|----|---|----|
| 16461 | 10 | 35882090  | G | T | 239  | Q | H | CCNY     | CCDS7189.1  | C | D  | D  | D | D  |
| 16461 | 10 | 54197985  | C | G | 222  | C | S | MBL2     | CCDS7247.1  | C | D  | D  | D | D  |
| 16461 | 10 | 98277860  | C | T | 487  | V | M | TM9SF3   | CCDS7450.1  | C | D  | D  | D | D  |
| 16461 | 10 | 108417470 | C | A | 757  | C | F | SORCS1   | CCDS7559.1  | C | D  | D  | D | D  |
| 16461 | 10 | 118425906 | G | T | 462  | H | N | HSPA12A  | CCDS41569.1 | C | D  | D  | D | NA |
| 16461 | 11 | 4977525   | A | T | 246  | H | L | OR51L1   | CCDS31369.1 | C | D  | D  | D | N  |
| 16461 | 11 | 47729390  | T | G | 222  | E | D | FNBP4    | CCDS41644.1 | C | NA | D  | D | D  |
| 16461 | 12 | 12868204  | G | C | 295  | G | A | DDX47    | CCDS8655.1  | C | D  | D  | D | D  |
| 16461 | 12 | 32866817  | C | A | 608  | V | L | PKP2     | CCDS8731.1  | C | D  | D  | D | D  |
| 16461 | 12 | 63104652  | G | T | 397  | D | Y | XPOT     | CCDS31852.1 | C | NA | D  | D | D  |
| 16461 | 12 | 69342612  | C | T | 513  | G | E | PTPRR    | CCDS8998.1  | C | D  | D  | D | D  |
| 16461 | 12 | 81304740  | G | T | 96   | C | F | C12orf26 | CCDS9024.1  | C | D  | D  | D | D  |
| 16461 | 12 | 99130248  | A | T | 219  | D | V | ACTR6    | CCDS9074.1  | C | D  | D  | D | D  |
| 16461 | 12 | 119919728 | C | A | 460  | Q | K | HNF1A    | CCDS9209.1  | C | D  | D  | D | D  |
| 16461 | 12 | 128260102 | T | G | 453  | K | N | TMEM132L | CCDS9266.1  | C | D  | D  | D | NA |
| 16461 | 12 | 131891384 | C | A | 530  | D | Y | GOLGA3   | CCDS9281.1  | C | D  | D  | D | D  |
| 16461 | 13 | 95306460  | G | C | 1321 | L | V | UGCGL2   | CCDS9480.1  | C | D  | D  | D | D  |
| 16461 | 14 | 19474205  | C | A | 180  | D | E | OR4K1    | CCDS32025.1 | C | D  | D  | D | N  |
| 16461 | 14 | 23690616  | G | T | 607  | R | L | RNF31    | CCDS41931.1 | C | T  | D  | D | D  |
| 16461 | 14 | 69514388  | G | A | 160  | G | D | SMOC1    | CCDS9798.1  | C | D  | D  | D | D  |
| 16461 | 14 | 74671438  | T | G | 188  | Y | S | TMED10   | CCDS9840.1  | C | D  | D  | D | D  |
| 16461 | 15 | 78988632  | A | G | 576  | Y | C | KIAA1199 | CCDS10315.1 | C | D  | D  | D | D  |
| 16461 | 16 | 24487776  | G | T | 755  | R | L | RBBP6    | CCDS10621.1 | C | D  | NA | D | D  |
| 16461 | 16 | 30981095  | T | A | 219  | T | S | ZNF668   | CCDS10701.1 | C | D  | P  | D | D  |
| 16461 | 16 | 46680023  | G | T | 1137 | L | I | ABCC12   | CCDS10730.1 | C | D  | D  | D | D  |
| 16461 | 16 | 60318499  | T | A | 512  | Q | H | CDH8     | CCDS10802.1 | C | D  | D  | D | D  |
| 16461 | 17 | 11534021  | G | T | 1386 | W | L | DNAH9    | CCDS11160.1 | C | D  | D  | D | D  |
| 16461 | 17 | 27825015  | G | A | 243  | D | N | PSMD11   | CCDS11272.1 | C | D  | B  | D | D  |
| 16461 | 17 | 60630798  | G | T | 374  | D | Y | RGS9     | CCDS42373.1 | C | D  | D  | D | D  |
| 16461 | 18 | 7030175   | C | T | 441  | C | Y | LAMA1    | CCDS32787.1 | C | D  | D  | D | D  |
| 16461 | 18 | 32552540  | G | C | 919  | R | P | FHOD3    | CCDS32816.1 | C | D  | NA | D | D  |
| 16461 | 18 | 37871739  | G | T | 642  | R | L | PIK3C3   | CCDS11920.1 | C | D  | D  | D | D  |
| 16461 | 18 | 40784483  | G | C | 340  | E | Q | SETBP1   | CCDS11923.1 | C | D  | D  | D | N  |
| 16461 | 18 | 45362743  | G | T | 350  | Q | H | LIPG     | CCDS11938.1 | C | D  | D  | D | D  |
| 16461 | 18 | 45820604  | C | G | 73   | D | H | MYO5B    | CCDS42436.1 | C | D  | D  | D | D  |
| 16461 | 18 | 53175392  | T | A | 185  | F | I | ST8SIA3  | CCDS32834.1 | C | D  | D  | D | D  |
| 16461 | 19 | 41024992  | A | C | 846  | L | R | NPHS1    | CCDS32996.1 | C | D  | D  | D | NA |
| 16461 | 19 | 47258826  | C | A | 89   | G | V | GRIK5    | CCDS12595.1 | C | D  | D  | D | D  |
| 16461 | 20 | 34493952  | C | A | 140  | R | S | DLGAP4   | CCDS13274.1 | C | D  | D  | D | D  |
| 16461 | 21 | 21704508  | G | C | 413  | W | C | NCAM2    | CCDS42910.1 | C | NA | D  | D | D  |
| 16461 | 22 | 30053135  | C | A | 602  | E | D | PATZ1    | CCDS13894.1 | C | D  | D  | D | D  |
| 16461 | 22 | 35601683  | G | A | 224  | V | M | NCF4     | CCDS13934.1 | C | D  | P  | D | D  |
| 16461 | X  | 48342977  | G | T | 151  | D | Y | WDR13    | CCDS14302.1 | C | D  | P  | D | D  |
| 16461 | X  | 48710599  | T | A | 342  | T | S | KCND1    | CCDS14314.1 | C | D  | D  | D | D  |
| 16461 | X  | 50356485  | G | T | 1478 | Q | K | SHROOM4  | CCDS35277.1 | C | D  | NA | D | D  |
| 16461 | X  | 118655087 | T | A | 296  | E | V | 6-Sep    | CCDS14583.1 | C | D  | D  | D | D  |
| 16617 | 1  | 41821668  | T | G | 463  | E | A | HIVEP3   | CCDS463.1   | C | D  | D  | D | D  |

|       |    |           |   |   |      |   |   |          |             |   |   |    |    |    |
|-------|----|-----------|---|---|------|---|---|----------|-------------|---|---|----|----|----|
| 16617 | 1  | 100406606 | C | T | 19   | E | K | LRRC39   | CCDS766.1   | C | D | D  | D  | D  |
| 16617 | 1  | 103236488 | C | A | 721  | G | V | COL11A1  | CCDS778.1   | C | D | NA | D  | D  |
| 16617 | 2  | 48439760  | A | T | 203  | K | M | FOXN2    | CCDS1838.1  | C | D | D  | D  | D  |
| 16617 | 2  | 85835517  | A | G | 232  | R | G | ATOH8    | CCDS1985.1  | C | D | D  | D  | D  |
| 16617 | 2  | 136105909 | G | C | 189  | R | P | R3HDM1   | CCDS2177.1  | C | T | D  | D  | D  |
| 16617 | 2  | 211164895 | G | T | 348  | G | V | CPS1     | CCDS2393.1  | C | D | P  | D  | D  |
| 16617 | 6  | 108325572 | C | T | 472  | V | I | SEC63    | CCDS5061.1  | C | D | P  | D  | D  |
| 16617 | 7  | 81473027  | G | A | 502  | P | L | CACNA2D1 | CCDS5598.1  | C | D | D  | D  | D  |
| 16617 | 7  | 93876622  | G | T | 282  | R | L | COL1A2   | CCDS34682.1 | C | D | NA | D  | D  |
| 16617 | 9  | 85448342  | A | T | 85   | I | F | C9orf103 | CCDS35048.1 | C | D | P  | D  | D  |
| 16617 | 9  | 127737658 | A | T | 265  | E | V | PBX3     | CCDS6865.1  | C | D | D  | D  | D  |
| 16617 | 10 | 59824794  | G | T | 232  | R | L | TFAM     | CCDS7253.1  | C | D | D  | D  | D  |
| 16617 | 14 | 93122988  | G | T | 828  | D | Y | KIAA1409 | CCDS9911.2  | C | D | D  | D  | D  |
| 16617 | 16 | 60318560  | T | A | 492  | N | I | CDH8     | CCDS10802.1 | C | D | D  | D  | D  |
| 16617 | 16 | 88363855  | G | C | 799  | P | A | FANCA    | CCDS32515.1 | C | D | D  | D  | N  |
| 16617 | 17 | 59129741  | A | C | 96   | F | C | LIMD2    | CCDS11641.1 | C | D | D  | D  | D  |
| 16617 | 19 | 14134628  | C | T | 329  | D | N | LPFN1    | CCDS12307.1 | C | D | D  | D  | NA |
| 16617 | 21 | 42284900  | G | A | 792  | R | W | ZNF295   | CCDS13678.1 | C | D | D  | D  | D  |
| 16617 | 22 | 40937196  | C | G | 1354 | A | P | TCF20    | CCDS14032.1 | C | D | D  | D  | N  |
| 16617 | X  | 21779645  | C | T | 179  | A | V | MBTPS2   | CCDS14201.1 | C | D | D  | D  | D  |
| 16989 | 1  | 195185291 | G | A | 48   | G | R | CFHR2    | CCDS30959.1 | C | D | D  | N  | D  |
| 16989 | 1  | 245655305 | C | A | 646  | A | D | NLRP3    | CCDS1632.1  | C | D | D  | D  | D  |
| 16989 | 3  | 123485778 | A | T | 763  | I | F | CASR     | CCDS3010.1  | C | T | D  | D  | D  |
| 16989 | 5  | 168133912 | C | T | 401  | D | N | SLIT3    | CCDS4369.1  | C | D | B  | D  | D  |
| 16989 | 7  | 27101485  | C | A | 191  | C | F | HOXA1    | CCDS5401.1  | C | T | D  | D  | D  |
| 16989 | 11 | 47776498  | G | C | 997  | Q | E | NUP160   | CCDS31484.1 | C | D | D  | D  | D  |
| 16989 | 13 | 29680852  | C | A | 433  | R | I | KATNAL1  | CCDS31956.1 | C | D | D  | D  | D  |
| 16989 | 16 | 56611586  | G | T | 245  | R | L | C16orf57 | CCDS10791.1 | C | T | D  | D  | D  |
| 16989 | 17 | 35135509  | A | T | 917  | T | S | ERBB2    | CCDS32642.1 | C | D | D  | NA | D  |
| 16989 | 17 | 70355600  | A | T | 586  | L | H | GRIN2C   | CCDS32724.1 | C | D | D  | N  | D  |
| 16989 | 18 | 27189035  | G | T | 960  | G | C | DSG1     | CCDS11896.1 | C | D | P  | D  | D  |
| 16989 | 19 | 36459745  | G | C | 932  | R | G | TSHZ3    | CCDS12421.2 | C | D | D  | D  | D  |
| 16989 | 20 | 30268176  | G | T | 178  | W | L | POFUT1   | CCDS13198.1 | C | D | D  | D  | NA |
| 16989 | X  | 116917258 | G | A | 537  | L | F | KLHL13   | CCDS14571.1 | C | D | D  | D  | D  |
| 18472 | 1  | 239818721 | C | T | 355  | A | V | KMO      | CCDS1618.1  | C | D | D  | D  | D  |
| 18472 | 2  | 201839759 | G | T | 102  | R | M | CASP8    | CCDS2342.1  | C | D | D  | D  | NA |
| 18472 | 3  | 198142180 | C | T | 753  | L | F | SENPA5   | CCDS3322.1  | C | D | P  | D  | D  |
| 18472 | 8  | 145062820 | C | T | 4413 | R | H | PLEC1    | CCDS43769.1 | C | D | D  | U  | D  |
| 18472 | 9  | 133759164 | T | C | 204  | M | V | MED27    | CCDS6945.1  | C | T | D  | D  | D  |
| 18472 | 10 | 27548715  | C | G | 155  | E | Q | ACBD5    | CCDS7154.1  | C | D | D  | D  | D  |
| 18472 | 10 | 95316832  | G | A | 122  | G | D | GPR120   | CCDS31248.1 | C | T | D  | D  | D  |
| 18472 | 11 | 6200327   | A | G | 371  | L | P | FAM160A2 | CCDS7760.1  | C | D | D  | D  | D  |
| 18472 | 11 | 128286493 | C | T | 39   | R | C | KCNJ5    | CCDS8479.1  | C | D | D  | N  | D  |
| 18472 | 14 | 51575302  | G | T | 724  | L | M | NID2     | CCDS9706.1  | C | D | P  | D  | D  |
| 18472 | 17 | 46452553  | T | C | 339  | M | V | SPAG9    | CCDS11577.1 | C | D | P  | D  | D  |
| 18472 | 18 | 27947722  | T | C | 98   | M | T | RNF138   | CCDS11903.1 | C | D | D  | D  | NA |
| 18472 | X  | 53619386  | T | C | 1991 | Y | C | HUWE1    | CCDS35301.1 | C | D | D  | N  | D  |

|       |    |           |   |   |      |   |   |          |             |   |    |   |    |   |
|-------|----|-----------|---|---|------|---|---|----------|-------------|---|----|---|----|---|
| 18472 | X  | 152840026 | G | A | 141  | R | C | ARHGAP4  | CCDS14736.1 | C | D  | D | D  | D |
| 7285  | 1  | 1257126   | C | G | 146  | S | W | TAS1R3   | CCDS30556.1 | C | D  | D | N  | D |
| 7285  | 1  | 152584147 | G | T | 821  | R | L | ATP8B2   | CCDS1066.1  | C | D  | D | D  | D |
| 7285  | 1  | 173571519 | C | A | 1194 | W | C | TNR      | CCDS1318.1  | C | D  | D | D  | D |
| 7285  | 1  | 198356676 | T | C | 404  | C | R | NR5A2    | CCDS1400.1  | C | D  | D | D  | D |
| 7285  | 1  | 213842125 | A | T | 366  | D | V | KCTD3    | CCDS1515.1  | C | D  | D | D  | D |
| 7285  | 2  | 40509715  | C | T | 404  | D | N | SLC8A1   | CCDS1806.1  | C | D  | D | D  | D |
| 7285  | 3  | 149942333 | G | A | 274  | C | Y | AGTR1    | CCDS3137.1  | C | D  | D | D  | D |
| 7285  | 3  | 184974166 | T | G | 753  | L | W | YEATS2   | CCDS43175.1 | C | NA | D | D  | D |
| 7285  | 5  | 38517785  | T | A | 988  | E | V | LIFR     | CCDS3927.1  | C | D  | D | D  | D |
| 7285  | 6  | 28979947  | A | C | 474  | F | C | TRIM27   | CCDS4654.1  | C | D  | D | D  | D |
| 7285  | 6  | 32038804  | A | T | 454  | S | C | SKIV2L   | CCDS4731.1  | C | D  | D | D  | D |
| 7285  | 6  | 90482175  | C | T | 2260 | E | K | MDN1     | CCDS5024.1  | C | D  | D | D  | D |
| 7285  | 7  | 94857442  | T | C | 54   | D | G | PON3     | CCDS5639.1  | C | D  | D | D  | D |
| 7285  | 7  | 106549671 | G | C | 128  | D | H | PRKAR2B  | CCDS5740.1  | C | D  | P | D  | D |
| 7285  | 7  | 124290699 | C | T | 163  | D | N | POT1     | CCDS5793.1  | C | T  | D | D  | D |
| 7285  | 7  | 128274177 | G | A | 1424 | G | R | FLNC     | CCDS43644.1 | C | D  | D | D  | D |
| 7285  | 7  | 133230916 | G | T | 587  | V | F | EXOC4    | CCDS5829.1  | C | D  | B | D  | D |
| 7285  | 8  | 39746172  | A | T | 370  | C | S | ADAM2    | CCDS34884.1 | C | D  | D | NA | D |
| 7285  | 8  | 69184231  | C | G | 989  | Q | E | PREX2    | CCDS6201.1  | C | D  | D | D  | N |
| 7285  | 8  | 69193377  | C | A | 1122 | T | N | PREX2    | CCDS6201.1  | C | D  | P | D  | D |
| 7285  | 8  | 75920032  | G | A | 169  | M | I | PI15     | CCDS6218.1  | C | T  | D | D  | D |
| 7285  | 8  | 87299119  | G | A | 292  | P | L | SLC7A13  | CCDS34917.1 | C | D  | D | N  | D |
| 7285  | 8  | 95333446  | C | A | 197  | R | L | GEM      | CCDS6261.1  | C | D  | D | D  | D |
| 7285  | 8  | 105525652 | C | A | 265  | G | W | DPYS     | CCDS6302.1  | C | D  | D | D  | D |
| 7285  | 8  | 109039549 | G | T | 184  | T | K | RSPO2    | CCDS6307.1  | C | T  | D | D  | D |
| 7285  | 8  | 113747682 | C | G | 939  | R | T | CSMD3    | CCDS6315.1  | C | T  | D | D  | D |
| 7285  | 8  | 121362376 | A | G | 1241 | K | E | COL14A1  | CCDS34938.1 | C | D  | D | D  | D |
| 7285  | 8  | 139220475 | C | A | 1279 | Q | H | FAM135B  | CCDS6375.2  | C | D  | D | D  | D |
| 7285  | 9  | 73539568  | C | T | 456  | C | Y | TMEM2    | CCDS6638.1  | C | D  | D | D  | D |
| 7285  | 9  | 79145215  | A | C | 2319 | N | H | VPS13A   | CCDS6655.1  | C | D  | D | D  | D |
| 7285  | 10 | 29011068  | C | T | 172  | A | V | BAMBI    | CCDS7162.1  | C | D  | D | D  | D |
| 7285  | 10 | 55625528  | G | T | 409  | P | Q | PCDH15   | CCDS7248.1  | C | D  | D | NA | D |
| 7285  | 10 | 60232938  | G | A | 704  | R | K | BICC1    | CCDS31206.1 | C | T  | D | D  | D |
| 7285  | 10 | 68196044  | G | T | 422  | T | N | CTNNA3   | CCDS7269.1  | C | D  | P | D  | D |
| 7285  | 12 | 7872686   | G | T | 209  | P | Q | SLC2A14  | CCDS8585.1  | C | T  | D | D  | D |
| 7285  | 12 | 46820797  | T | A | 406  | M | K | PFKM     | CCDS8760.1  | C | D  | P | D  | D |
| 7285  | 12 | 71333185  | G | T | 944  | W | L | TRHDE    | CCDS9004.1  | C | D  | D | D  | D |
| 7285  | 15 | 26129882  | T | A | 2310 | Q | H | HERC2    | CCDS10021.1 | C | T  | D | D  | D |
| 7285  | 15 | 39647727  | A | G | 328  | N | D | TYRO3    | CCDS10080.1 | C | D  | D | D  | D |
| 7285  | 15 | 40243156  | T | C | 697  | I | V | VPS39    | CCDS10083.1 | C | D  | P | D  | D |
| 7285  | 16 | 9765091   | A | C | 1271 | W | G | GRIN2A   | CCDS10539.1 | C | T  | D | D  | D |
| 7285  | 16 | 13927978  | C | T | 150  | R | C | ERCC4    | CCDS32390.1 | C | D  | D | D  | D |
| 7285  | 16 | 57133655  | G | A | 1554 | P | L | CNOT1    | CCDS10799.1 | C | D  | D | D  | D |
| 7285  | 16 | 75950732  | G | T | 436  | H | N | ADAMTS18 | CCDS10926.1 | C | D  | D | D  | D |
| 7285  | 17 | 8107152   | G | T | 471  | V | L | PFAS     | CCDS11136.1 | C | D  | P | D  | D |
| 7285  | 17 | 50439923  | C | T | 211  | P | L | STXBP4   | CCDS11584.2 | C | D  | D | N  | D |

|      |    |           |   |   |      |   |   |          |             |   |    |   |   |    |
|------|----|-----------|---|---|------|---|---|----------|-------------|---|----|---|---|----|
| 7285 | 17 | 53924943  | G | A | 1113 | P | L | MTMR4    | CCDS11608.1 | C | D  | D | D | D  |
| 7285 | 17 | 78383528  | G | T | 31   | P | H | ZNF750   | CCDS11819.1 | C | D  | D | D | D  |
| 7285 | 18 | 46829184  | G | T | 127  | C | F | SMAD4    | CCDS11950.1 | C | D  | D | D | D  |
| 7285 | 18 | 48846516  | C | A | 415  | L | I | DCC      | CCDS11952.1 | C | D  | D | D | D  |
| 7285 | 20 | 9337715   | G | C | 617  | R | P | PLCB4    | CCDS13104.1 | C | D  | D | D | D  |
| 7285 | 20 | 21635111  | G | C | 14   | V | L | PAX1     | CCDS13146.1 | C | D  | D | D | NA |
| 7285 | 20 | 30019907  | T | C | 90   | F | L | XKR7     | CCDS33459.1 | C | D  | D | D | NA |
| 7285 | 20 | 49566879  | G | T | 395  | P | T | NFATC2   | CCDS13437.1 | C | D  | P | D | D  |
| 7285 | 22 | 41988706  | C | T | 192  | G | S | SCUBE1   | CCDS14048.1 | C | D  | B | D | D  |
| 7285 | X  | 31406370  | A | G | 444  | L | P | DMD      | CCDS14228.1 | C | D  | D | U | D  |
| 7313 | 1  | 17221745  | G | A | 237  | P | L | SDHB     | CCDS176.1   | C | D  | D | D | D  |
| 7313 | 1  | 35977688  | G | A | 1058 | A | V | CLSPN    | CCDS396.1   | C | D  | D | D | D  |
| 7313 | 1  | 111240846 | C | T | 158  | P | S | CD53     | CCDS829.1   | C | T  | D | D | D  |
| 7313 | 1  | 163780453 | G | T | 99   | G | V | LRRC52   | CCDS30930.1 | C | T  | D | D | D  |
| 7313 | 1  | 167612560 | C | T | 63   | L | F | BLZF1    | CCDS1278.1  | C | D  | D | D | D  |
| 7313 | 1  | 174316912 | T | C | 426  | S | G | RFWD2    | CCDS30944.1 | C | D  | D | D | D  |
| 7313 | 1  | 177321625 | C | T | 205  | H | Y | TOR3A    | CCDS1329.1  | C | D  | D | D | D  |
| 7313 | 1  | 226945979 | G | A | 216  | D | N | RHOA     | CCDS1575.1  | C | D  | D | D | D  |
| 7313 | 1  | 232666292 | T | A | 438  | Q | L | TARBP1   | CCDS1601.1  | C | D  | D | D | N  |
| 7313 | 1  | 241802912 | G | T | 253  | A | E | AKT3     | CCDS31076.1 | C | D  | D | D | D  |
| 7313 | 2  | 37159879  | G | C | 76   | L | V | HEATR5B  | CCDS33181.1 | C | D  | B | D | D  |
| 7313 | 2  | 79238974  | G | C | 107  | H | D | REG3A    | CCDS1965.1  | C | D  | D | N | D  |
| 7313 | 2  | 136281421 | C | A | 1307 | G | V | LCT      | CCDS2178.1  | C | D  | D | D | D  |
| 7313 | 2  | 159822617 | C | G | 284  | V | L | WDSUB1   | CCDS2208.1  | C | D  | D | D | D  |
| 7313 | 2  | 175691002 | G | A | 137  | P | S | ATF2     | CCDS2262.1  | C | T  | D | D | D  |
| 7313 | 2  | 177807179 | C | G | 38   | D | H | NFE2L2   | CCDS42782.1 | C | NA | D | D | D  |
| 7313 | 3  | 38735180  | C | A | 1217 | A | S | SCN10A   | CCDS33736.1 | C | D  | D | D | NA |
| 7313 | 3  | 95075874  | C | A | 646  | G | C | PROS1    | CCDS2923.1  | C | D  | D | D | NA |
| 7313 | 3  | 110305434 | C | A | 59   | G | W | MORC1    | CCDS2955.1  | C | D  | D | D | D  |
| 7313 | 3  | 125692946 | T | A | 1556 | N | K | KALRN    | CCDS3027.1  | C | T  | D | D | D  |
| 7313 | 3  | 180824488 | T | A | 179  | I | N | NDUFB5   | CCDS3234.1  | C | D  | D | D | D  |
| 7313 | 4  | 48741575  | G | T | 607  | D | Y | FLJ21511 | CCDS3486.1  | C | D  | D | D | D  |
| 7313 | 5  | 19874647  | G | C | 69   | P | R | CDH18    | CCDS3889.1  | C | D  | D | D | D  |
| 7313 | 5  | 21819255  | C | A | 454  | Q | H | CDH12    | CCDS3890.1  | C | D  | D | D | D  |
| 7313 | 5  | 50147087  | C | T | 547  | A | V | PARP8    | CCDS3954.1  | C | T  | D | D | D  |
| 7313 | 5  | 63292794  | G | C | 170  | P | R | HTR1A    | CCDS34168.1 | C | D  | D | D | D  |
| 7313 | 6  | 106642943 | G | T | 37   | G | C | PRDM1    | CCDS5054.1  | C | D  | D | D | D  |
| 7313 | 6  | 134345445 | G | T | 61   | W | L | TBPL1    | CCDS5168.1  | C | D  | D | D | D  |
| 7313 | 7  | 110550783 | G | T | 240  | S | I | LRRN3    | CCDS5754.1  | C | D  | D | D | N  |
| 7313 | 7  | 111883293 | G | T | 67   | G | V | IFRD1    | CCDS34736.1 | C | D  | D | D | D  |
| 7313 | 7  | 124191326 | C | A | 314  | C | F | GPR37    | CCDS5792.1  | C | D  | D | D | D  |
| 7313 | 7  | 125960819 | C | A | 618  | G | V | GRM8     | CCDS5794.1  | C | D  | D | D | D  |
| 7313 | 7  | 136822907 | G | T | 791  | R | S | DGKI     | CCDS5845.1  | C | D  | D | D | D  |
| 7313 | 7  | 137451937 | G | T | 324  | D | Y | AKR1D1   | CCDS5846.1  | C | D  | D | D | D  |
| 7313 | 7  | 139694936 | G | A | 328  | A | V | SLC37A3  | CCDS5858.1  | C | D  | P | D | D  |
| 7313 | 8  | 27665969  | C | T | 75   | V | M | CCDC25   | CCDS6062.2  | C | D  | D | D | D  |
| 7313 | 9  | 73550195  | G | C | 198  | S | C | TMEM2    | CCDS6638.1  | C | D  | D | D | D  |

|         |    |           |   |   |      |   |   |          |             |   |   |    |    |   |
|---------|----|-----------|---|---|------|---|---|----------|-------------|---|---|----|----|---|
| 7313    | 10 | 393838    | G | A | 945  | S | F | DIP2C    | CCDS7054.1  | C | D | P  | D  | D |
| 7313    | 10 | 14612398  | G | C | 198  | P | A | FAM107B  | CCDS7102.1  | C | D | D  | D  | D |
| 7313    | 11 | 1263862   | C | T | 186  | V | M | TOLLIP   | CCDS7723.1  | C | D | B  | D  | D |
| 7313    | 11 | 18209665  | G | A | 118  | P | L | SAA4     | CCDS7832.1  | C | D | D  | NA | D |
| 7313    | 11 | 40094292  | G | C | 43   | R | G | LRR4C    | CCDS31464.1 | C | T | D  | D  | D |
| 7313    | 11 | 64581430  | G | A | 198  | R | C | NAALADL1 | CCDS31604.1 | C | D | D  | D  | D |
| 7313    | 11 | 65407278  | T | A | 276  | V | E | CTSW     | CCDS8117.1  | C | D | D  | N  | D |
| 7313    | 11 | 122353797 | A | G | 158  | F | L | BSX      | CCDS41728.1 | C | D | D  | D  | D |
| 7313    | 12 | 841543    | C | T | 662  | S | F | WNK1     | CCDS8506.1  | C | D | B  | D  | D |
| 7313    | 12 | 37984960  | C | A | 1484 | C | F | KIF21A   | CCDS31773.1 | C | D | D  | D  | D |
| 7313    | 12 | 74023956  | T | A | 131  | C | S | GLIPR1L1 | CCDS9009.1  | C | D | D  | D  | D |
| 7313    | 14 | 23642247  | G | T | 471  | G | W | PCK2     | CCDS9609.1  | C | D | D  | D  | D |
| 7313    | 14 | 92751070  | T | G | 162  | F | V | UBR7     | CCDS9909.1  | C | D | D  | D  | D |
| 7313    | 14 | 104684768 | C | G | 807  | G | R | JAG2     | CCDS9998.1  | C | D | D  | D  | D |
| 7313    | 15 | 32142850  | T | A | 214  | C | S | CHRM5    | CCDS10031.1 | C | T | D  | D  | D |
| 7313    | 15 | 60780660  | G | T | 551  | D | Y | TLN2     | CCDS32261.1 | C | D | P  | D  | D |
| 7313    | 16 | 3741731   | T | C | 1259 | Q | R | CREBBP   | CCDS10509.1 | C | D | NA | D  | D |
| 7313    | 16 | 23907383  | C | T | 87   | P | S | PRKCB    | CCDS10618.1 | C | D | D  | D  | D |
| 7313    | 17 | 4672957   | A | T | 878  | Y | F | PLD2     | CCDS11057.1 | C | T | D  | D  | D |
| 7313    | 17 | 7518276   | C | G | 244  | G | R | TP53     | CCDS11118.1 | C | D | D  | D  | D |
| 7313    | 17 | 77420125  | G | C | 177  | I | M | ARHGDI A | CCDS11788.1 | C | D | P  | D  | D |
| 7313    | 18 | 5413430   | T | A | 429  | Y | F | EPB41L3  | CCDS11838.1 | C | T | D  | D  | D |
| 7313    | 19 | 570252    | G | C | 1037 | F | L | POLRMT   | CCDS12036.1 | C | D | D  | D  | D |
| 7313    | 19 | 7499572   | G | T | 323  | G | C | MCOLN1   | CCDS12180.1 | C | D | D  | D  | D |
| 7313    | 20 | 8718179   | T | C | 1098 | M | T | PLCB1    | CCDS13102.1 | C | D | D  | D  | N |
| 7313    | X  | 48921364  | G | A | 293  | R | C | PRICKLE3 | CCDS14320.1 | C | D | D  | N  | D |
| 7313    | X  | 57179437  | G | T | 107  | L | I | SPIN2A   | CCDS35312.1 | C | D | P  | D  | D |
| 7313    | X  | 152685681 | G | A | 69   | G | S | PLXNB3   | CCDS14729.1 | C | D | D  | D  | D |
| 7945    | 16 | 1440569   | G | A | 516  | P | L | CLCN7    | CCDS32361.1 | C | D | D  | D  | D |
| 7996    | 1  | 70250138  | C | A | 321  | L | I | LRR7     | CCDS645.1   | C | D | D  | D  | D |
| 7996    | 1  | 153716158 | C | T | 1043 | G | R | ASH1L    | CCDS1113.2  | C | D | P  | D  | D |
| 7996    | 8  | 53188343  | T | A | 1038 | I | F | ST18     | CCDS6149.1  | C | D | D  | D  | D |
| 7996    | 8  | 54304587  | G | C | 322  | N | K | OPRK1    | CCDS6152.1  | C | D | D  | D  | D |
| 7996    | 9  | 33913820  | A | T | 923  | S | R | UBAP2    | CCDS6547.1  | C | D | NA | D  | D |
| 7996    | 11 | 34090188  | A | G | 72   | R | G | NAT10    | CCDS7889.1  | C | D | P  | D  | D |
| 7996    | 11 | 103413501 | C | G | 247  | N | K | DDI1     | CCDS31660.1 | C | T | D  | D  | D |
| 7996    | 12 | 54890445  | C | T | 89   | G | S | RNF41    | CCDS8909.1  | C | D | D  | D  | D |
| 7996    | 16 | 74220863  | T | C | 501  | E | G | KARS     | CCDS10923.1 | C | D | D  | D  | D |
| 7996    | 18 | 3492541   | G | A | 892  | H | Y | DLGAP1   | CCDS11836.1 | C | T | D  | D  | D |
| 7996    | 18 | 32552519  | G | T | 912  | R | L | FHOD3    | CCDS32816.1 | C | D | D  | D  | D |
| LU-1516 | 7  | 55227009  | T | G | 858  | L | R | EGFR     | CCDS5514.1  | C | D | D  | D  | D |
| LU-1516 | X  | 9824046   | C | A | 700  | R | S | SHROOM2  | CCDS14135.1 | C | D | D  | D  | D |
| LU-1991 | 1  | 67211197  | T | G | 293  | C | G | MIER1    | CCDS41347.1 | C | D | D  | D  | D |
| LU-1991 | 1  | 77760111  | G | T | 441  | L | F | AK5      | CCDS675.1   | C | D | D  | D  | D |
| LU-1991 | 1  | 156565843 | C | G | 276  | G | A | CD1B     | CCDS1176.1  | C | D | D  | D  | N |
| LU-1991 | 1  | 178418035 | G | T | 237  | C | F | QSOX1    | CCDS1337.1  | C | T | D  | D  | D |
| LU-1991 | 1  | 212237806 | G | C | 435  | Q | H | PROX1    | CCDS31021.1 | C | D | D  | D  | D |

|            |           |   |   |      |   |   |          |             |   |    |   |   |   |
|------------|-----------|---|---|------|---|---|----------|-------------|---|----|---|---|---|
| LU-1991 1  | 234220832 | C | A | 969  | A | S | NID1     | CCDS1608.1  | C | D  | B | D | D |
| LU-1991 2  | 11252590  | T | A | 1154 | E | V | ROCK2    | CCDS42654.1 | C | NA | D | D | D |
| LU-1991 2  | 26538102  | C | A | 1066 | W | C | OTOF     | CCDS1724.1  | C | D  | D | D | D |
| LU-1991 2  | 26538103  | C | A | 1066 | W | L | OTOF     | CCDS1724.1  | C | D  | D | D | D |
| LU-1991 2  | 68219425  | C | G | 196  | D | H | WDR92    | CCDS1884.1  | C | D  | D | D | N |
| LU-1991 2  | 105224759 | C | A | 4    | N | K | GPR45    | CCDS2066.1  | C | D  | D | D | D |
| LU-1991 2  | 113133798 | G | A | 532  | G | D | SLC20A1  | CCDS2099.1  | C | D  | D | D | D |
| LU-1991 2  | 116227309 | C | A | 340  | T | K | DPP10    | CCDS33278.1 | C | D  | D | D | D |
| LU-1991 2  | 116288975 | C | A | 606  | Q | K | DPP10    | CCDS33278.1 | C | T  | D | D | D |
| LU-1991 2  | 163000262 | G | T | 549  | A | D | KCNH7    | CCDS2219.1  | C | D  | D | D | D |
| LU-1991 2  | 165729250 | A | T | 167  | F | Y | SCN3A    | CCDS33312.1 | C | D  | P | D | D |
| LU-1991 2  | 185511592 | C | A | 1075 | P | Q | ZNF804A  | CCDS2291.1  | C | D  | D | N | D |
| LU-1991 2  | 191989110 | G | C | 1004 | D | H | MYO1B    | CCDS2311.1  | C | D  | D | D | D |
| LU-1991 2  | 228594762 | G | T | 202  | D | E | SPHKAP   | CCDS33389.1 | C | D  | D | D | D |
| LU-1991 2  | 233118618 | C | A | 501  | P | Q | CHRNA    | CCDS33400.1 | C | D  | D | D | D |
| LU-1991 3  | 38238145  | G | T | 188  | G | V | OXSRI    | CCDS2675.1  | C | D  | D | D | D |
| LU-1991 3  | 43364226  | G | A | 491  | E | K | SNRK     | CCDS43075.1 | C | NA | D | D | D |
| LU-1991 3  | 43571774  | C | A | 556  | Q | H | ANO10    | CCDS2710.2  | C | D  | D | D | D |
| LU-1991 3  | 69211988  | C | A | 9    | K | N | UBA3     | CCDS2909.1  | C | D  | B | D | D |
| LU-1991 3  | 141605301 | C | G | 125  | Q | E | CLSTN2   | CCDS3112.1  | C | D  | D | D | D |
| LU-1991 4  | 2099666   | C | A | 652  | D | Y | POLN     | CCDS33360.1 | C | D  | D | D | D |
| LU-1991 4  | 47807369  | C | T | 130  | G | D | TXK      | CCDS3480.1  | C | T  | D | D | D |
| LU-1991 4  | 129262756 | G | T | 496  | W | L | LARP2    | CCDS3738.1  | C | D  | D | D | D |
| LU-1991 4  | 142870498 | G | T | 97   | V | F | IL15     | CCDS3755.1  | C | D  | D | D | D |
| LU-1991 4  | 164658041 | C | A | 132  | P | T | C4orf43  | CCDS43278.1 | C | T  | D | D | D |
| LU-1991 5  | 176246670 | C | A | 599  | G | V | HK3      | CCDS4407.1  | C | D  | D | D | D |
| LU-1991 6  | 26216075  | C | T | 76   | D | N | HIST1H1T | CCDS34349.1 | C | T  | D | D | D |
| LU-1991 6  | 33397647  | C | G | 12   | D | H | DAXX     | CCDS4776.1  | C | D  | D | D | D |
| LU-1991 6  | 38939692  | T | A | 1909 | S | T | DNAH8    | CCDS4838.1  | C | D  | D | D | N |
| LU-1991 6  | 64474055  | C | T | 1182 | T | M | PHF3     | CCDS4966.1  | C | D  | D | N | D |
| LU-1991 6  | 85503281  | C | G | 555  | L | F | TBX18    | CCDS34495.1 | C | D  | D | N | D |
| LU-1991 6  | 127649791 | T | G | 113  | W | G | RNF146   | CCDS5136.1  | C | D  | D | D | D |
| LU-1991 6  | 131263970 | G | T | 325  | R | S | EPB41L2  | CCDS5141.1  | C | D  | D | D | D |
| LU-1991 6  | 160033761 | G | T | 50   | H | N | SOD2     | CCDS5265.1  | C | D  | D | D | D |
| LU-1991 7  | 20664717  | G | A | 89   | A | T | ABCB5    | CCDS5371.1  | C | D  | D | D | D |
| LU-1991 7  | 27839084  | G | C | 198  | H | D | JAZF1    | CCDS5416.1  | C | D  | D | D | D |
| LU-1991 9  | 137811066 | C | A | 924  | P | T | KCNT1    | CCDS35175.1 | C | D  | D | U | D |
| LU-1991 9  | 137811067 | C | A | 924  | P | H | KCNT1    | CCDS35175.1 | C | D  | D | U | D |
| LU-1991 9  | 139261954 | G | C | 12   | P | R | FAM166A  | CCDS35186.1 | C | D  | D | D | D |
| LU-1991 10 | 15726035  | C | T | 467  | D | N | ITGA8    | CCDS31155.1 | C | D  | D | D | D |
| LU-1991 10 | 33514567  | C | T | 809  | C | Y | NRP1     | CCDS7177.1  | C | D  | D | D | D |
| LU-1991 10 | 76405173  | A | T | 358  | S | C | MYST4    | CCDS7345.1  | C | D  | D | D | N |
| LU-1991 10 | 82172228  | G | A | 85   | C | Y | C10orf58 | CCDS7368.1  | C | D  | D | D | N |
| LU-1991 11 | 87940654  | C | A | 615  | R | S | GRM5     | CCDS8283.1  | C | D  | D | D | D |
| LU-1991 12 | 4606164   | C | A | 722  | G | V | AKAP3    | CCDS8531.1  | C | D  | D | N | D |
| LU-1991 12 | 38963996  | G | T | 765  | G | V | LRRK2    | CCDS31774.1 | C | D  | D | D | D |
| LU-1991 12 | 38984189  | A | T | 1255 | N | Y | LRRK2    | CCDS31774.1 | C | D  | D | D | D |



|         |    |           |   |   |      |   |   |          |             |   |   |    |   |    |
|---------|----|-----------|---|---|------|---|---|----------|-------------|---|---|----|---|----|
| LU-1991 | 12 | 42462517  | G | A | 361  | R | H | IRAK4    | CCDS8744.1  | C | D | D  | D | D  |
| LU-1991 | 12 | 51063841  | G | C | 185  | F | L | KRT84    | CCDS8825.1  | C | D | D  | D | N  |
| LU-1991 | 12 | 67931302  | G | T | 63   | D | Y | CPSF6    | CCDS8988.1  | C | D | NA | D | D  |
| LU-1991 | 12 | 75973987  | C | G | 50   | E | Q | E2F7     | CCDS9016.1  | C | T | D  | D | D  |
| LU-1991 | 12 | 94431758  | A | G | 462  | I | V | METAP2   | CCDS9052.1  | C | D | B  | D | D  |
| LU-1991 | 12 | 103991796 | C | A | 56   | D | Y | ALDH1L2  | CCDS31891.1 | C | D | D  | D | D  |
| LU-1991 | 14 | 30712334  | C | A | 312  | G | V | HECTD1   | CCDS41939.1 | C | D | D  | D | D  |
| LU-1991 | 14 | 52296167  | T | G | 150  | V | G | STYX     | CCDS9711.1  | C | D | D  | D | D  |
| LU-1991 | 14 | 101586627 | G | T | 4639 | G | C | DYNC1H1  | CCDS9966.1  | C | D | D  | D | D  |
| LU-1991 | 15 | 40531226  | C | A | 156  | G | V | ZFP106   | CCDS32208.1 | C | D | D  | D | D  |
| LU-1991 | 15 | 50396587  | C | A | 1762 | D | Y | MYO5A    | CCDS42037.1 | C | D | B  | D | D  |
| LU-1991 | 15 | 73438537  | G | A | 686  | S | F | MAN2C1   | CCDS32298.1 | C | T | D  | D | D  |
| LU-1991 | 16 | 49733015  | C | T | 207  | V | M | SALL1    | CCDS10747.1 | C | D | D  | D | D  |
| LU-1991 | 18 | 21061233  | G | T | 216  | S | Y | ZNF521   | CCDS32806.1 | C | D | D  | D | N  |
| LU-1991 | 18 | 31171252  | A | G | 350  | L | P | ZNF24    | CCDS11912.1 | C | D | D  | N | D  |
| LU-1991 | 18 | 45583177  | C | T | 21   | G | R | ACAA2    | CCDS11939.1 | C | D | D  | D | D  |
| LU-2349 | 3  | 42274716  | G | C | 76   | R | G | CCK      | CCDS2696.1  | C | D | D  | D | D  |
| LU-2349 | 3  | 143986285 | G | T | 303  | G | V | TRPC1    | CCDS3126.1  | C | D | D  | D | D  |
| LU-2349 | 5  | 170327904 | A | T | 543  | E | V | RANBP17  | CCDS34287.1 | C | D | D  | D | D  |
| LU-2349 | 7  | 81552054  | C | A | 209  | G | C | CACNA2D1 | CCDS5598.1  | C | D | D  | D | D  |
| LU-2349 | 7  | 124298227 | C | T | 77   | D | N | POT1     | CCDS5793.1  | C | D | D  | D | D  |
| LU-2349 | 7  | 128202403 | G | T | 132  | R | S | OPN1SW   | CCDS5806.1  | C | D | D  | D | D  |
| LU-2349 | 10 | 115364589 | T | A | 1027 | D | V | NRAP     | CCDS7578.1  | C | D | D  | D | D  |
| LU-2349 | 14 | 46190581  | C | A | 37   | G | C | RPL10L   | CCDS32071.1 | C | D | D  | D | D  |
| LU-2349 | 14 | 50546922  | C | G | 361  | R | P | TRIM9    | CCDS9703.1  | C | D | D  | D | D  |
| LU-2349 | 20 | 2544813   | A | C | 635  | N | H | TMC2     | CCDS13029.2 | C | D | P  | D | D  |
| LU-2349 | 20 | 6707411   | G | T | 289  | R | L | BMP2     | CCDS13099.1 | C | D | D  | N | D  |
| LU-2349 | X  | 53287799  | G | T | 764  | H | Q | IQSEC2   | CCDS35298.1 | C | D | D  | D | D  |
| LU-2349 | X  | 150874627 | A | C | 336  | Y | D | GABRE    | CCDS14703.1 | C | D | D  | D | NA |
| Lu-597  | 20 | 33776439  | A | T | 157  | C | S | RBM39    | CCDS13265.1 | C | D | D  | D | NA |

**Supplementary Table 10.** Comparison of the somatic SNVs from our exomes with the COSMIC database

| Sample   | Gene     | Locus                     | mutation | Exome-seq   | COSMIC reported mutations                                                                                                                                                                                                                                                                                                                                                           |
|----------|----------|---------------------------|----------|-------------|-------------------------------------------------------------------------------------------------------------------------------------------------------------------------------------------------------------------------------------------------------------------------------------------------------------------------------------------------------------------------------------|
| 7313     | TP53     | chr17:7518276-7518276     | missense | p.G244R     | p.G244R,p.G244A,p.G244C,p.G244D,p.G244fs*19,p.G244fs*3,p.G244S,p.G244V,p.M243_G244>IC,p.M243I,p.M243T,p.Y236_M243delYMCNSSCM                                                                                                                                                                                                                                                        |
| 12820    | TP53     | chr17:7519119-7519119     | missense | p.H179R     | p.H179R,p.C176fs*68,p.E171_H179delEVVRRCPHH,p.E171fs*1,p.H178_H179>QY,p.H179D,p.H179del,p.H179fs*68,p.H179H,p.H179L,p.H179N,p.H179P,p.H179Q,p.H179Y,p.P177_H179delPHH,p.R174_H179delRRCPPHH,p.R174fs*1,p.V157F,p.D148fs*23,p.G154_R156delGTR,p.R156del,p.R156R,p.T155_R156delTR,p.T155fs*23,p.V157A,p.V157D,p.V157fs*13,p.V157fs*23,p.V157fs*24,p.V157fs*25,p.V157G,p.V157I,p.V157L |
| 16461    | TP53     | chr17:7519186-7519186     | missense | p.V157F     | p.R156P,p.G154_R156delGTR,p.G154fs*14,p.P152fs*14,p.R156C,p.R156del,p.R156fs*14,p.R156fs*25,p.R156G,p.R156H,p.R156L,p.R156R,p.R156S,p.T155_R156delTR,p.V157fs*13                                                                                                                                                                                                                    |
| 7996     | TP53     | chr17:7519188-7519188     | missense | p.R156P     | p.T155P,p.G154G,p.P152fs*14,p.Q144_G154del11,p.T155A,p.T155fs*15,p.T155fs*25,p.T155fs*26,p.T155I,p.T155N,p.T155S                                                                                                                                                                                                                                                                    |
| LU-1991  | TP53     | chr17:7519192-7519192     | missense | p.T155P     | p.G154fs*27,p.G154A,p.G154C,p.G154D,p.G154G,p.G154I,p.G154S,p.G154V,p.P153_G154insX,p.P153fs*26,p.Q144_G154del11,p.Q144fs*16,p.T150fs*16                                                                                                                                                                                                                                            |
| 13542    | TP53     | chr17:7519194-7519194     | FS_del   | p.G154fs*27 | p.V122fs*26                                                                                                                                                                                                                                                                                                                                                                         |
| 15822    | TP53     | chr17:7520046-7520047     | FS_del   | p.V122fs*26 | p.V73fs*50,p.R72fs*51,p.R72H,p.V73fs*76,p.V73L,p.V73M                                                                                                                                                                                                                                                                                                                               |
| 12924    | TP53     | chr17:7520196-7520196     | FS_del   | p.V73fs*50  | p.P34fs*8,p.L35fs*9,p.P34L                                                                                                                                                                                                                                                                                                                                                          |
| 13394    | TP53     | chr17:7520310-7520310     | FS_del   | P34fs*8     | p.L26fs*18,p.P27fs*17                                                                                                                                                                                                                                                                                                                                                               |
| 7285     | TP53     | chr17:7520443-7520443     | FS_del   | p.L26fs*18  |                                                                                                                                                                                                                                                                                                                                                                                     |
| 12586,13 |          |                           |          |             | p.G12C,p.A11_G12insGA,p.G12A,p.G12D,p.G12F,p.G12fs*3,p.G12I,p.G12L,p.G12N,p.G12R,p.G12S,p.G12V,p.G12Y                                                                                                                                                                                                                                                                               |
| 681      | KRAS     | chr12:25289552-25289552   | missense | p.G12C      | p.K175N                                                                                                                                                                                                                                                                                                                                                                             |
| 12924    | MAB21L1  | chr13:34947750-34947750   | missense | p.C176G     | p.G86S                                                                                                                                                                                                                                                                                                                                                                              |
| 12586    | ZNF345   | chr19:42059829-42059829   | missense | p.G86V      | p.K720*                                                                                                                                                                                                                                                                                                                                                                             |
| 13280    | RB1      | chr13:47935919-47935919   | nonsense | p.K720*     | p.L858R,p.L858K,p.L858L,p.L858M,p.L858Q                                                                                                                                                                                                                                                                                                                                             |
| LU-1516  | EGFR     | chr7:55227009-55227009    | missense | p.L858R     | p.R162*                                                                                                                                                                                                                                                                                                                                                                             |
| LU-1516  | PIK3R1   | chr5:67605579-67605579    | nonsense | p.R162*     | p.T811R                                                                                                                                                                                                                                                                                                                                                                             |
| 12924    | HKDC1    | chr10:70695406-70695406   | missense | p.T811K     | p.V76A                                                                                                                                                                                                                                                                                                                                                                              |
| 12586    | GPS1     | chr17:77604511-77604511   | missense | p.V76L      | p.H61R,p.H61L,p.H61P                                                                                                                                                                                                                                                                                                                                                                |
| 13394    | PTEN     | chr10:89675267-89675267   | missense | p.H61R      | p.R1156H                                                                                                                                                                                                                                                                                                                                                                            |
| 16246    | KIAA1409 | chr14:93149139-93149139   | missense | p.R1156L    | p.Y286*                                                                                                                                                                                                                                                                                                                                                                             |
| 12924    | NTNG1    | chr1:107669038-107669038  | nonsense | p.Y286*     | p.R141S                                                                                                                                                                                                                                                                                                                                                                             |
| 12924    | APC      | chr5:112139225-112139225  | missense | p.R141S     | p.T95T                                                                                                                                                                                                                                                                                                                                                                              |
| LU-2349  | ADAM12   | chr10:127833839-127833839 | missense | p.E96Q      | p.V23M                                                                                                                                                                                                                                                                                                                                                                              |
| 12820    | SLC37A3  | chr7:139728729-139728729  | missense | p.V23L      | p.R765Q                                                                                                                                                                                                                                                                                                                                                                             |
| 15858    | CLSTN2   | chr3:141764424-141764424  | missense | p.R765L     | p.G1043R                                                                                                                                                                                                                                                                                                                                                                            |
| 7996     | ASH1L    | chr1:153716158-153716158  | missense | p.G1043R    |                                                                                                                                                                                                                                                                                                                                                                                     |

**Supplementary Table 11.** Mutated genes common in both ADC and SCC

| Genes    | #_ADC | #_SCC | #_tumors | alpha    | pvalueLRT |
|----------|-------|-------|----------|----------|-----------|
| TP53     | 3     | 7     | 10       | 9.89E-05 | 5.9E-16   |
| LRRC7    | 2     | 3     | 5        | 2.07E-05 | 3.5E-07   |
| SLC7A13  | 1     | 2     | 3        | 3.72E-05 | 6.6E-06   |
| PCDH11X  | 2     | 2     | 4        | 1.76E-05 | 3.7E-05   |
| CSMD3    | 1     | 5     | 6        | 8.45E-06 | 5.7E-05   |
| DNAH3    | 2     | 1     | 3        | 4.04E-05 | 7.8E-05   |
| CD1B     | 2     | 1     | 3        | 3.80E-05 | 3.0E-04   |
| CACNA2D1 | 2     | 2     | 4        | 1.34E-05 | 4.8E-04   |
| KEAP1    | 1     | 2     | 3        | 2.01E-05 | 6.8E-04   |
| PIK3C2B  | 1     | 3     | 4        | 9.30E-06 | 7.2E-04   |
| CTNNA3   | 1     | 3     | 4        | 1.71E-05 | 9.9E-04   |
| USH2A    | 2     | 3     | 5        | 4.27E-06 | 1.2E-03   |
| NAV3     | 2     | 2     | 4        | 7.60E-06 | 1.5E-03   |
| FAT4     | 3     | 2     | 5        | 1.09E-05 | 1.6E-03   |
| PAPPA2   | 2     | 2     | 4        | 8.39E-06 | 2.1E-03   |
| ZNF804A  | 1     | 3     | 4        | 1.26E-05 | 2.1E-03   |
| IGSF11   | 1     | 2     | 3        | 2.70E-05 | 2.3E-03   |
| PIK3CG   | 2     | 1     | 3        | 1.08E-05 | 2.4E-03   |
| SLC39A12 | 1     | 2     | 3        | 1.66E-05 | 3.0E-03   |
| SLC17A6  | 2     | 1     | 3        | 2.01E-05 | 3.2E-03   |
| BICC1    | 1     | 2     | 3        | 6.71E-05 | 3.3E-03   |
| TSHZ2    | 2     | 1     | 3        | 1.13E-05 | 3.9E-03   |
| DCC      | 1     | 3     | 4        | 1.22E-05 | 4.2E-03   |
| ABCC11   | 2     | 1     | 3        | 8.23E-06 | 4.8E-03   |
| KCNT1    | 2     | 1     | 3        | 1.16E-05 | 5.5E-03   |
| ZNF521   | 2     | 1     | 3        | 1.10E-05 | 7.7E-03   |
| PCDHB10  | 2     | 1     | 3        | 1.54E-05 | 7.8E-03   |
| SPTA1    | 1     | 3     | 4        | 5.54E-06 | 7.9E-03   |
| CDH18    | 1     | 2     | 3        | 1.43E-05 | 9.4E-03   |
| BAI3     | 1     | 2     | 3        | 8.79E-06 | 1.4E-02   |
| MYH2     | 1     | 2     | 3        | 6.75E-06 | 1.5E-02   |
| FLNC     | 3     | 1     | 4        | 4.76E-06 | 2.0E-02   |
| PARP8    | 1     | 2     | 3        | 1.15E-05 | 3.4E-02   |
| ROCK2    | 2     | 1     | 3        | 6.69E-06 | 4.3E-02   |
| DYSF     | 2     | 1     | 3        | 3.99E-06 | 4.7E-02   |
| LRP1B    | 2     | 2     | 4        | 2.62E-06 | 5.7E-02   |
| SALL1    | 1     | 2     | 3        | 7.71E-06 | 5.9E-02   |
| WDR17    | 2     | 1     | 3        | 6.93E-06 | 6.5E-02   |
| ALK      | 2     | 1     | 3        | 5.88E-06 | 7.1E-02   |
| CSMD2    | 2     | 2     | 4        | 2.90E-06 | 7.8E-02   |
| ANK1     | 2     | 2     | 4        | 4.52E-06 | 8.0E-02   |
| MYH1     | 1     | 2     | 3        | 4.41E-06 | 8.3E-02   |
| MYO5A    | 2     | 1     | 3        | 4.63E-06 | 1.0E-01   |
| KIAA1409 | 1     | 2     | 3        | 3.38E-06 | 1.1E-01   |
| HEATR5B  | 2     | 1     | 3        | 4.22E-06 | 1.1E-01   |
| PHKA1    | 1     | 2     | 3        | 4.80E-06 | 1.7E-01   |
| XIRP2    | 2     | 2     | 4        | 2.13E-06 | 2.2E-01   |
| SI       | 1     | 2     | 3        | 3.62E-06 | 2.4E-01   |
| KALRN    | 1     | 2     | 3        | 2.08E-06 | 2.9E-01   |
| LAMA1    | 2     | 1     | 3        | 1.20E-06 | 5.8E-01   |
| MLL3     | 1     | 2     | 3        | 8.41E-07 | 6.1E-01   |
| SYNE1    | 1     | 2     | 3        | 0.00E+00 | 1.0E+00   |

**Supplementary Table 12.** Mutated genes specific in ADC

| <b>Genes</b> | <b>#_tumors</b> | <b>alpha</b> | <b>pvalueLRT</b> |
|--------------|-----------------|--------------|------------------|
| ZNF717       | 3               | 2.14E-05     | 2.16E-09         |
| RAB6B        | 2               | 3.84E-05     | 5.79E-05         |
| DCAF12L2     | 2               | 2.91E-05     | 5.22E-04         |
| MAGEB18      | 2               | 2.54E-05     | 1.29E-03         |
| C14orf49     | 2               | 8.81E-06     | 1.29E-03         |
| AHSG         | 2               | 2.33E-05     | 1.99E-03         |
| KRAS         | 2               | 3.51E-05     | 2.53E-03         |
| KIF5A        | 2               | 7.16E-06     | 7.56E-03         |
| RBL1         | 2               | 7.05E-06     | 7.77E-03         |
| CPNE3        | 2               | 1.36E-05     | 9.83E-03         |
| ZBTB20       | 2               | 1.05E-05     | 1.04E-02         |
| ATP6V1A      | 2               | 1.21E-05     | 1.20E-02         |
| NPAS4        | 2               | 9.96E-06     | 1.80E-02         |
| GFRAL        | 2               | 1.91E-05     | 1.81E-02         |
| TTC5         | 2               | 1.75E-05     | 2.11E-02         |
| CLSTN2       | 2               | 7.72E-06     | 2.12E-02         |
| ZFP57        | 2               | 1.45E-05     | 2.20E-02         |
| DPP10        | 2               | 1.16E-05     | 2.67E-02         |
| THUMPD2      | 2               | 1.49E-05     | 2.84E-02         |
| RANBP17      | 2               | 6.35E-06     | 3.83E-02         |
| KANK4        | 2               | 7.76E-06     | 3.85E-02         |
| MYO3B        | 2               | 5.04E-06     | 4.39E-02         |
| KLHL4        | 2               | 9.95E-06     | 4.65E-02         |
| NOX4         | 2               | 1.16E-05     | 5.53E-02         |
| NELL1        | 2               | 8.25E-06     | 5.58E-02         |
| QSOX1        | 2               | 9.83E-06     | 5.74E-02         |
| ASTN1        | 2               | 5.04E-06     | 6.32E-02         |
| FAM75C2      | 2               | 6.48E-06     | 6.71E-02         |
| ANKRD30A     | 2               | 4.78E-06     | 8.39E-02         |
| LTBP1        | 2               | 3.60E-06     | 8.84E-02         |
| ANO10        | 2               | 9.96E-06     | 9.56E-02         |
| KCNT2        | 2               | 5.38E-06     | 1.04E-01         |
| PROX1        | 2               | 9.16E-06     | 1.08E-01         |
| PKD1L1       | 2               | 2.12E-06     | 1.20E-01         |
| ROBO2        | 2               | 4.34E-06     | 1.37E-01         |
| SCN2A        | 2               | 2.72E-06     | 1.39E-01         |
| ABCA6        | 2               | 3.24E-06     | 1.93E-01         |
| SMC2         | 2               | 4.52E-06     | 2.03E-01         |
| CTNND2       | 2               | 4.57E-06     | 2.20E-01         |
| COL24A1      | 2               | 3.03E-06     | 2.44E-01         |
| CABIN1       | 2               | 2.09E-06     | 2.99E-01         |
| NOS1         | 2               | 3.21E-06     | 3.14E-01         |
| ABCA12       | 2               | 6.90E-07     | 7.43E-01         |

**Supplementary Table 13.** Mutated genes specific in SCC

| Genes       | #_tumors | alpha    | pvalueLRT |
|-------------|----------|----------|-----------|
| ARMCX2      | 3        | 2.08E-05 | 2.26E-04  |
| COL27A1     | 2        | 4.06E-05 | 4.78E-04  |
| APBB1IP     | 2        | 1.24E-04 | 5.22E-04  |
| HSPA6       | 2        | 1.96E-05 | 3.97E-03  |
| DDI1        | 2        | 2.17E-05 | 7.23E-03  |
| SLCO4A1     | 2        | 1.10E-05 | 7.35E-03  |
| SDHB        | 2        | 2.78E-05 | 8.90E-03  |
| DAB1        | 2        | 1.39E-05 | 9.13E-03  |
| ZFP42       | 2        | 2.63E-05 | 1.02E-02  |
| OR10G8      | 2        | 2.81E-05 | 1.03E-02  |
| PPM1B       | 2        | 1.58E-05 | 1.04E-02  |
| PLCXD3      | 2        | 2.56E-05 | 1.07E-02  |
| MMP16       | 2        | 1.29E-05 | 1.08E-02  |
| PYHIN1      | 2        | 1.57E-05 | 1.11E-02  |
| VEZF1       | 2        | 1.56E-05 | 1.12E-02  |
| ZNF543      | 2        | 1.33E-05 | 1.18E-02  |
| CORO2B      | 2        | 1.60E-05 | 1.21E-02  |
| COL11A1     | 4        | 7.02E-06 | 1.43E-02  |
| LILRB5      | 2        | 1.32E-05 | 1.83E-02  |
| CDKAL1      | 2        | 1.27E-05 | 1.96E-02  |
| FAM107B     | 2        | 2.54E-05 | 2.01E-02  |
| SPRYD5      | 2        | 1.69E-05 | 2.15E-02  |
| LMBRD2      | 2        | 1.07E-05 | 2.19E-02  |
| PRPF4B      | 2        | 7.42E-06 | 2.45E-02  |
| ZNF676      | 2        | 1.30E-05 | 2.53E-02  |
| IL1RAPL1    | 2        | 1.07E-05 | 2.59E-02  |
| FAM160A2    | 2        | 7.97E-06 | 3.11E-02  |
| LRCH4       | 2        | 1.14E-05 | 3.20E-02  |
| SLC37A3     | 2        | 1.36E-05 | 3.31E-02  |
| DACH2       | 2        | 1.22E-05 | 3.96E-02  |
| PROC        | 2        | 1.58E-05 | 4.39E-02  |
| KIF2B       | 2        | 1.15E-05 | 4.42E-02  |
| NDUFA13     | 2        | 2.77E-05 | 4.65E-02  |
| KBTBD5      | 2        | 1.22E-05 | 4.96E-02  |
| PCCB        | 2        | 1.26E-05 | 5.64E-02  |
| RGAG1       | 2        | 5.28E-06 | 6.11E-02  |
| TKTL2       | 2        | 1.20E-05 | 6.93E-02  |
| TPTE        | 2        | 1.17E-05 | 7.03E-02  |
| PCDHB3      | 2        | 9.48E-06 | 7.41E-02  |
| AMPH        | 2        | 9.51E-06 | 8.62E-02  |
| KIF21A      | 2        | 3.60E-06 | 9.33E-02  |
| GRIN2A      | 2        | 6.19E-06 | 9.69E-02  |
| SIPA1L1     | 2        | 3.63E-06 | 1.08E-01  |
| IMPG2       | 2        | 5.17E-06 | 1.08E-01  |
| ATP8A2      | 2        | 5.10E-06 | 1.16E-01  |
| ZNF107      | 2        | 8.06E-06 | 1.30E-01  |
| SPICE1      | 2        | 6.59E-06 | 1.39E-01  |
| PREX2       | 2        | 4.66E-06 | 1.48E-01  |
| HCN1        | 2        | 7.17E-06 | 1.52E-01  |
| TPR         | 2        | 2.26E-06 | 1.62E-01  |
| KIF17       | 2        | 6.01E-06 | 1.63E-01  |
| AOX1        | 2        | 3.89E-06 | 2.39E-01  |
| FMN2        | 2        | 3.18E-06 | 2.57E-01  |
| ZNF804B     | 2        | 3.97E-06 | 2.63E-01  |
| TAF1L       | 2        | 2.89E-06 | 2.74E-01  |
| WNK1        | 2        | 2.20E-06 | 3.25E-01  |
| TMEM2       | 2        | 3.42E-06 | 3.28E-01  |
| CD36        | 2        | 3.11E-06 | 3.70E-01  |
| LAMB1       | 2        | 2.36E-06 | 3.82E-01  |
| SYTL2       | 2        | 2.40E-06 | 4.04E-01  |
| LCT         | 2        | 1.65E-06 | 5.65E-01  |
| KIAA1109    | 2        | 0.00E+00 | 1.00E+00  |
| <i>MDN1</i> | 2        | 0.00E+00 | 1.00E+00  |
| UBR4        | 2        | 0.00E+00 | 1.00E+00  |

Supplementary Table 14. Sortable Summary of Mutated Sample Gene-Set Enrichment Analysis

| Category                                                           | Estimated False Discovery Rate                                |                                                               |                                                               |                       |                           |                       |                                 |                           |                           |
|--------------------------------------------------------------------|---------------------------------------------------------------|---------------------------------------------------------------|---------------------------------------------------------------|-----------------------|---------------------------|-----------------------|---------------------------------|---------------------------|---------------------------|
|                                                                    | AC<br>nonsense,<br>frameshift,<br>or low-SIFT-                |                                                               |                                                               | Common,<br>non-silent |                           |                       | SCC-<br>specific<br>AC-specific |                           |                           |
|                                                                    | All nonsense,<br>frameshift, or<br>low-SIFT-score<br>missense | SCC nonsense,<br>frameshift, or<br>low-SIFT-score<br>missense | nonsense,<br>frameshift,<br>or low-SIFT-<br>score<br>missense | Non-<br>smokers       | log10(Aco)-<br>log10(SCC) | Common,<br>non-silent | SCC-<br>specific<br>non-silent  | AC-specific<br>non-silent | log10(Aco)-<br>log10(SCC) |
| EML4/ALK fusion protein in non smoking-related lung cancer         | 9E-17                                                         | 4E-08                                                         | 1E-08                                                         | 8E-02                 | (0)                       | 3E-19                 | 1E+00                           | 1E-02                     | (2)                       |
| Cell cycle_Role of 14-3-3 proteins in cell cycle regulation        | 6E-16                                                         | 7E-10                                                         | 9E-06                                                         | 1E-01                 | 4                         | 1E-15                 | 1E+00                           | 1E+00                     | -                         |
| Ding et al 2008 Lung AC pathway, Figure 6                          | 6E-16                                                         | 4E-08                                                         | 3E-07                                                         | 8E-02                 | 1                         | 2E-20                 | 1E+00                           | 1E+00                     | -                         |
| DNA damage_DNA-damage-induced responses                            | 6E-16                                                         | 4E-10                                                         | 1E-05                                                         | 3E-01                 | 5                         | 6E-19                 | 1E+00                           | 1E+00                     | -                         |
| Tissue factor signaling in Lung Cancer                             | 8E-15                                                         | 7E-08                                                         | 9E-07                                                         | 7E-02                 | 1                         | 1E-16                 | 1E+00                           | 1E-02                     | (2)                       |
| Proteolysis_Putative SUMO-1 pathway                                | 3E-14                                                         | 4E-10                                                         | 5E-04                                                         | 3E-01                 | 6                         | 6E-21                 | 1E+00                           | 1E+00                     | -                         |
| Gene Go Multiple Myeloma                                           | 4E-14                                                         | 3E-07                                                         | 8E-07                                                         | 2E-01                 | 0                         | 5E-16                 | 1E+00                           | 8E-03                     | (2)                       |
| Immune response_MIF in innate immunity response                    | 4E-14                                                         | 3E-09                                                         | 7E-05                                                         | 2E-01                 | 4                         | 5E-17                 | 1E+00                           | 1E+00                     | -                         |
| Gene Go Lung Cancer                                                | 7E-14                                                         | 4E-08                                                         | 1E-05                                                         | 2E-01                 | 3                         | 3E-16                 | 1E+00                           | 2E-01                     | (1)                       |
| Bessarabova et al 2011 Pancreatic Driver Mutations                 | 1E-13                                                         | 1E-07                                                         | 7E-06                                                         | 1E-01                 | 2                         | 2E-20                 | 2E-02                           | 6E-02                     | 0                         |
| HGF signaling in pancreatic cancer                                 | 2E-13                                                         | 2E-07                                                         | 5E-06                                                         | 1E-01                 | 1                         | 2E-18                 | 1E+00                           | 1E+00                     | -                         |
| Bessarabova et al 2011 Breast Driver Mutations                     | 2E-13                                                         | 5E-08                                                         | 3E-05                                                         | 2E-01                 | 3                         | 8E-19                 | 1E-05                           | 1E+00                     | 5                         |
| DNA damage_Role of SUMO in p53 regulation                          | 2E-13                                                         | 9E-10                                                         | 9E-04                                                         | 2E-01                 | 6                         | 5E-20                 | 1E+00                           | 1E+00                     | -                         |
| Jones et al 2008 Apoptosis                                         | 2E-13                                                         | 2E-07                                                         | 9E-06                                                         | 1E-01                 | 2                         | 8E-10                 | 1E+00                           | 7E-02                     | (1)                       |
| Bessarabova et al 2011 Colon Driver Mutations                      | 3E-13                                                         | 7E-06                                                         | 4E-07                                                         | 2E-01                 | (1)                       | 8E-19                 | 1E+00                           | 2E-04                     | (4)                       |
| ChemoresistancepathwaysmediatedbyconstitutiveactivationofPI3Kp;    | 7E-13                                                         | 9E-10                                                         | 2E-03                                                         | 8E-02                 | 6                         | 6E-13                 | 1E+00                           | 1E+00                     | -                         |
| DNA damage_ATM/ATR regulation of G1/S checkpoint                   | 7E-13                                                         | 2E-08                                                         | 2E-04                                                         | 1E-01                 | 4                         | 1E-15                 | 1E+00                           | 1E+00                     | -                         |
| DNA Damage Control                                                 | 1E-12                                                         | 3E-06                                                         | 5E-06                                                         | 2E-01                 | 0                         | 2E-14                 | 7E-03                           | 1E+00                     | 2                         |
| Bessarabova et al 2011 GBM Driver Mutations                        | 1E-12                                                         | 5E-08                                                         | 1E-04                                                         | 8E-02                 | 3                         | 3E-18                 | 1E+00                           | 1E+00                     | -                         |
| Apoptosis and survival_Role of CDK5 in neuronal death and survival | 3E-12                                                         | 1E-06                                                         | 1E-05                                                         | 8E-02                 | 1                         | 3E-15                 | 1E+00                           | 1E+00                     | -                         |
| Apoptosis                                                          | 4E-12                                                         | 7E-06                                                         | 4E-06                                                         | 3E-01                 | (0)                       | 3E-16                 | 2E-02                           | 1E+00                     | 2                         |
| Gene Go Pancreatic Cancer                                          | 5E-12                                                         | 4E-07                                                         | 7E-05                                                         | 3E-01                 | 2                         | 3E-11                 | 8E-01                           | 3E-01                     | (0)                       |
| Transcription_P53 signaling pathway                                | 7E-12                                                         | 7E-08                                                         | 4E-04                                                         | 7E-02                 | 4                         | 9E-19                 | 1E+00                           | 1E+00                     | -                         |
| Signal transduction_AKT signaling                                  | 7E-12                                                         | 7E-08                                                         | 4E-04                                                         | 7E-02                 | 4                         | 9E-15                 | 1E+00                           | 1E+00                     | -                         |
| TGF-beta signaling in Disease                                      | 7E-12                                                         | 2E-07                                                         | 1E-04                                                         | 1E-01                 | 3                         | 3E-16                 | 1E+00                           | 1E+00                     | -                         |
| HBV-dependent NF-kB and PI3K/AKT pathways leading to HCC           | 7E-12                                                         | 2E-07                                                         | 1E-04                                                         | 1E-01                 | 3                         | 3E-16                 | 1E+00                           | 1E+00                     | -                         |
| LKB1 signaling pathway in lung cancer cells                        | 8E-12                                                         | 7E-10                                                         | 1E-02                                                         | 8E-02                 | 7                         | 4E-15                 | 1E+00                           | 1E+00                     | -                         |
| vogelstein_02_DNA damagecontrol                                    | 2E-11                                                         | 7E-07                                                         | 1E-04                                                         | 8E-02                 | 2                         | 8E-15                 | 1E+00                           | 1E+00                     | -                         |
| KRAS signaling in pancreatic cancer                                | 2E-11                                                         | 3E-06                                                         | 3E-05                                                         | 7E-02                 | 1                         | 2E-14                 | 1E+00                           | 1E-02                     | (2)                       |
| Gene Go HCC                                                        | 2E-11                                                         | 3E-06                                                         | 3E-05                                                         | 3E-01                 | 1                         | 2E-10                 | 2E-02                           | 3E-01                     | 1                         |
| TGF-beta signaling                                                 | 2E-11                                                         | 3E-05                                                         | 5E-06                                                         | 1E-01                 | (1)                       | 5E-12                 | 1E+00                           | 6E-02                     | (1)                       |
| Jones et al 2008 JNK signaling pathway                             | 2E-11                                                         | 2E-08                                                         | 4E-03                                                         | 1E-01                 | 5                         | 9E-20                 | 1E+00                           | 1E+00                     | -                         |
| Signal transduction_JNK pathway                                    | 2E-11                                                         | 2E-08                                                         | 4E-03                                                         | 1E-01                 | 5                         | 9E-20                 | 1E+00                           | 1E+00                     | -                         |
| JNK signaling in Lung                                              | 4E-11                                                         | 2E-07                                                         | 7E-04                                                         | 7E-02                 | 4                         | 3E-21                 | 1E+00                           | 1E+00                     | -                         |
| Signal transduction_PTEN pathway                                   | 4E-11                                                         | 2E-07                                                         | 7E-04                                                         | 7E-02                 | 4                         | 6E-14                 | 1E+00                           | 1E+00                     | -                         |
| Gene Go Gastric Cancer Gene Sets                                   | 5E-11                                                         | 4E-05                                                         | 1E-05                                                         | 3E-01                 | (1)                       | 2E-13                 | 1E+00                           | 1E+00                     | -                         |
| DNA damage_Role of Brca1 and Brca2 in DNA repair                   | 7E-11                                                         | 1E-06                                                         | 3E-04                                                         | 8E-02                 | 2                         | 3E-15                 | 1E+00                           | 1E+00                     | -                         |
| Development_Neutrophin family signaling                            | 7E-11                                                         | 1E-06                                                         | 3E-04                                                         | 8E-02                 | 2                         | 3E-15                 | 1E+00                           | 1E+00                     | -                         |
| Jones et al 2008 Reg. of G1/S Phase Transition                     | 9E-11                                                         | 3E-06                                                         | 1E-04                                                         | 5E-01                 | 2                         | 8E-08                 | 6E-01                           | 6E-03                     | (2)                       |
| RASgroup                                                           | 1E-10                                                         | 4E-07                                                         | 8E-04                                                         | 1E+00                 | 3                         | 3E-07                 | 8E-01                           | 3E-01                     | (0)                       |
| Development_Leptin signaling via PI3K-dependent pathway            | 2E-10                                                         | 5E-05                                                         | 2E-05                                                         | 1E+00                 | (0)                       | 4E-02                 | 1E+00                           | 1E+00                     | -                         |
| Cell adhesion_ECM remodeling                                       | 4E-10                                                         | 2E-07                                                         | 4E-03                                                         | 1E+00                 | 4                         | 2E-04                 | 7E-04                           | 1E+00                     | 3                         |
| Mechanisms of resistance to EGFR inhibitors in lung cancer         | 6E-09                                                         | 2E-04                                                         | 7E-05                                                         | 1E+00                 | (0)                       | 7E-02                 | 1E+00                           | 2E-02                     | (2)                       |
| MAPK Signaling                                                     | 7E-09                                                         | 3E-04                                                         | 7E-05                                                         | 1E+00                 | (1)                       | 3E-06                 | 1E+00                           | 3E-04                     | (4)                       |
| Jones et al 2008 Cell Adhesion                                     | 8E-09                                                         | 2E-04                                                         | 1E-04                                                         | 1E+00                 | (0)                       | 9E-12                 | 4E-01                           | 4E-03                     | (2)                       |
| Genentech AACR 2011 GPCR Lung Cancer Genes                         | 2E-08                                                         | 3E-06                                                         | 8E-03                                                         | 1E+00                 | 3                         | 2E-04                 | 1E+00                           | 1E+00                     | -                         |
| Cell Adhesion                                                      | 2E-08                                                         | 4E-04                                                         | 1E-04                                                         | 1E+00                 | (0)                       | 1E-06                 | 2E-01                           | 1E+00                     | 1                         |
| PIP3 signaling                                                     | 4E-08                                                         | 1E-04                                                         | 7E-04                                                         | 1E+00                 | 1                         | 6E-03                 | 1E+00                           | 1E+00                     | -                         |
| Apoptosis and survival_BAD phosphorylation                         | 4E-08                                                         | 5E-06                                                         | 9E-03                                                         | 1E+00                 | 3                         | 5E-02                 | 4E-02                           | 1E+00                     | 1                         |
| cAMP signaling                                                     | 5E-08                                                         | 6E-04                                                         | 1E-04                                                         | 1E+00                 | (1)                       | 1E-03                 | 1E+00                           | 1E+00                     | -                         |
| Jones et al 2008 Small GPTases                                     | 5E-08                                                         | 1E-03                                                         | 1E-04                                                         | 9E-02                 | (1)                       | 3E-09                 | 5E-03                           | 8E-02                     | 1                         |
| Integrin signaling                                                 | 8E-08                                                         | 1E-04                                                         | 1E-03                                                         | 1E+00                 | 1                         | 1E-07                 | 4E-01                           | 1E+00                     | 0                         |
| GPCRgroup                                                          | 1E-07                                                         | 2E-03                                                         | 1E-04                                                         | 8E-01                 | (1)                       | 3E-10                 | 1E+00                           | 1E-02                     | (2)                       |
| Role of alpha-4 beta-6 integrins in carcinoma progression          | 2E-07                                                         | 9E-05                                                         | 4E-03                                                         | 1E+00                 | 2                         | 2E-04                 | 8E-02                           | 1E+00                     | 1                         |
| Transcription_CREM signaling in testis                             | 4E-07                                                         | 8E-05                                                         | 8E-03                                                         | 1E+00                 | 2                         | 2E-04                 | 3E-02                           | 1E+00                     | 1                         |
| PI3K signaling in gastric cancer                                   | 4E-07                                                         | 1E-03                                                         | 5E-04                                                         | 1E+00                 | (0)                       | 5E-02                 | 1E+00                           | 1E+00                     | -                         |
| Cell adhesion_Integrin-mediated cell adhesion and migration        | 7E-07                                                         | 7E-05                                                         | 1E-02                                                         | 1E+00                 | 2                         | 9E-06                 | 2E-01                           | 1E+00                     | 1                         |
| ERBB family and HGF signaling in gastric cancer                    | 7E-07                                                         | 4E-03                                                         | 1E-04                                                         | 1E+00                 | (1)                       | 9E-02                 | 1E+00                           | 1E+00                     | -                         |
| vogelstein_09_invasion                                             | 8E-07                                                         | 3E-04                                                         | 5E-03                                                         | 6E-01                 | 1                         | 4E-12                 | 2E-03                           | 3E-01                     | 2                         |
| Transcription_PPAR Pathway                                         | 1E-06                                                         | 2E-03                                                         | 9E-04                                                         | 1E+00                 | (0)                       | 6E-02                 | 1E+00                           | 1E+00                     | -                         |
| Regulation of lipid metabolism_Insulin signaling:generic cascades  | 1E-06                                                         | 2E-04                                                         | 1E-02                                                         | 1E+00                 | 2                         | 6E-02                 | 1E+00                           | 1E+00                     | -                         |
| Non-genomic signaling of ESR2 membrane in lung cancer cells        | 1E-06                                                         | 2E-04                                                         | 1E-02                                                         | 1E+00                 | 2                         | 6E-02                 | 1E+00                           | 1E+00                     | -                         |
| Cell adhesion_Ephrin signaling                                     | 2E-06                                                         | 5E-04                                                         | 5E-03                                                         | 1E+00                 | 1                         | 3E-11                 | 1E+00                           | 1E+00                     | -                         |
| Signal transduction_cAMP signaling                                 | 2E-06                                                         | 2E-04                                                         | 1E-02                                                         | 1E+00                 | 2                         | 3E-05                 | 1E+00                           | 1E+00                     | -                         |
| G-protein signaling, not KRAS                                      | 3E-06                                                         | 3E-03                                                         | 7E-04                                                         | 1E+00                 | (1)                       | 1E-04                 | 1E+00                           | 1E-01                     | (1)                       |
| GTPases                                                            | 3E-06                                                         | 7E-03                                                         | 3E-04                                                         | 1E+00                 | (1)                       | 2E-04                 | 1E+00                           | 3E-02                     | (2)                       |
| Jones et al 2008 Integrin signaling                                | 3E-06                                                         | 2E-04                                                         | 2E-02                                                         | 1E+00                 | 2                         | 2E-05                 | 2E-01                           | 1E+00                     | 1                         |
| Genentech AACR 2011 GPCR Lung Cancer Genes                         | 3E-06                                                         | 8E-04                                                         | 6E-03                                                         | 1E+00                 | 1                         | 7E-06                 | 1E+00                           | 1E+00                     | -                         |
| KRAS signaling in lung cancer                                      | 3E-06                                                         | 8E-04                                                         | 6E-03                                                         | 1E+00                 | 1                         | 4E-02                 | 1E+00                           | 1E-02                     | (2)                       |
| Proteolysis_Role of Parkin in the Ubiquitin-Proteasomal Pathway    | 3E-06                                                         | 5E-05                                                         | 5E-02                                                         | 1E+00                 | 3                         | 1E+00                 | 3E-02                           | 1E+00                     | 2                         |

|                                                                     |       |       |       |       |     |       |       |       |     |
|---------------------------------------------------------------------|-------|-------|-------|-------|-----|-------|-------|-------|-----|
| EGFR signaling pathway in LungCancer                                | 3E-06 | 8E-04 | 6E-03 | 1E+00 | 1   | 1E+00 | 1E+00 | 1E+00 | -   |
| Development_Ligand-independent activation of ESR1 and ESR2          | 4E-06 | 3E-03 | 2E-03 | 1E+00 | (0) | 8E-02 | 1E+00 | 1E+00 | -   |
| Transcription_CREB pathway                                          | 5E-06 | 1E-03 | 5E-03 | 1E+00 | 1   | 3E-04 | 1E+00 | 1E+00 | -   |
| Neurophysiological process_PGE2-induced pain processing             | 6E-06 | 4E-04 | 2E-02 | 1E+00 | 2   | 9E-02 | 6E-02 | 1E+00 | 1   |
| Notch Signaling                                                     | 6E-06 | 1E-03 | 8E-03 | 1E+00 | 1   | 5E-02 | 1E+00 | 1E+00 | -   |
| Immune response_Function of MEF2 in T lymphocytes                   | 6E-06 | 1E-03 | 8E-03 | 1E+00 | 1   | 1E+00 | 1E+00 | 1E-02 | (2) |
| Integrins in Disease                                                | 9E-06 | 5E-04 | 2E-02 | 1E+00 | 2   | 2E-02 | 6E-02 | 1E+00 | 1   |
| Translation_Non-genomic (rapid) action of Androgen Receptor         | 9E-06 | 5E-04 | 2E-02 | 1E+00 | 2   | 1E+00 | 1E+00 | 1E+00 | -   |
| GPCR                                                                | 1E-05 | 1E-02 | 6E-04 | 1E+00 | (1) | 8E-08 | 1E-01 | 1E+00 | 1   |
| Development_Hedgehog and PTH signaling pathways in bone and car     | 1E-05 | 1E-04 | 7E-02 | 1E+00 | 3   | 3E-04 | 1E+00 | 1E+00 | -   |
| Jones et al 2008 Notch and WNT signaling                            | 1E-05 | 2E-04 | 4E-02 | 1E+00 | 2   | 5E-04 | 1E+00 | 1E+00 | -   |
| G-protein signaling_G-Protein beta/gamma signaling cascades         | 1E-05 | 4E-03 | 4E-03 | 1E+00 | (0) | 2E-06 | 1E+00 | 1E+00 | -   |
| G-protein signaling_G-Protein alpha-12 signaling pathway            | 1E-05 | 4E-03 | 4E-03 | 1E+00 | (0) | 2E-06 | 1E+00 | 1E+00 | -   |
| Regulation of degradation of deltaF508 CFTR in CF                   | 1E-05 | 4E-04 | 4E-02 | 1E+00 | 2   | 1E+00 | 2E-02 | 1E+00 | 2   |
| Cell adhesion_Endothelial cell contacts by non-junctional mechanism | 1E-05 | 2E-06 | 5E-01 | 1E+00 | 5   | 6E-06 | 7E-02 | 1E+00 | 1   |
| Development_G-Proteins mediated regulation MAPK-ERK signaling       | 2E-05 | 2E-04 | 8E-02 | 1E+00 | 3   | 5E-04 | 1E+00 | 1E+00 | -   |
| Signal transduction_Erk Interactions: Inhibition of Erk             | 2E-05 | 2E-03 | 1E-02 | 1E+00 | 1   | 6E-02 | 4E-02 | 1E+00 | 1   |
| InfluenceofsmokingonactivationofEGFRsignalinginlungcancer           | 2E-05 | 2E-03 | 1E-02 | 1E+00 | 1   | 6E-02 | 1E+00 | 1E+00 | -   |
| Development_Notch Signaling Pathway                                 | 2E-05 | 2E-03 | 1E-02 | 1E+00 | 1   | 6E-02 | 1E+00 | 1E+00 | -   |
| EIF                                                                 | 2E-05 | 2E-03 | 1E-02 | 1E+00 | 1   | 1E+00 | 1E+00 | 1E+00 | -   |
| Development_Role of HDAC and calcium/calmodulin-dependent kina      | 2E-05 | 2E-04 | 8E-02 | 1E+00 | 3   | 1E+00 | 1E+00 | 1E+00 | -   |
| Cell adhesion_Cell-matrix glycoconjugates                           | 2E-05 | 5E-04 | 4E-02 | 1E+00 | 2   | 4E-06 | 3E-02 | 1E+00 | 2   |
| Inhibitory action of Lipoxin A4 on PDGF, EGF and LTD4 signaling     | 2E-05 | 6E-03 | 5E-03 | 1E+00 | (0) | 3E-02 | 1E+00 | 1E+00 | -   |
| Development_CNTF receptor signaling                                 | 2E-05 | 5E-04 | 4E-02 | 1E+00 | 2   | 3E-02 | 1E+00 | 1E+00 | -   |
| Development_ERBB-family signaling                                   | 2E-05 | 6E-03 | 5E-03 | 1E+00 | (0) | 1E+00 | 1E+00 | 1E+00 | -   |
| Stimulation of TGF-beta signaling in lung cancer                    | 2E-05 | 5E-04 | 4E-02 | 1E+00 | 2   | 1E+00 | 1E+00 | 1E+00 | -   |
| Development_Beta-adrenergic receptors signaling via cAMP            | 3E-05 | 2E-03 | 1E-02 | 1E+00 | 1   | 3E-05 | 1E+00 | 1E+00 | -   |
| wtCFTR and delta508-CFTR traffic / Generic schema (norm and CF)     | 3E-05 | 2E-03 | 1E-02 | 1E+00 | 1   | 9E-03 | 1E+00 | 1E+00 | -   |
| Cytoskeleton remodeling_Integrin outside-in signaling               | 3E-05 | 1E-04 | 2E-01 | 1E+00 | 3   | 3E-02 | 8E-02 | 1E+00 | 1   |
| Cell adhesion_Integrin inside-out signaling                         | 4E-05 | 3E-04 | 1E-01 | 1E+00 | 3   | 2E-09 | 1E+00 | 1E+00 | -   |
| Cell adhesion_Plasmin signaling                                     | 4E-05 | 3E-03 | 1E-02 | 1E+00 | 1   | 5E-05 | 5E-02 | 1E+00 | 1   |
| Neurophysiological process_Receptor-mediated axon growth repuls     | 4E-05 | 2E-02 | 2E-03 | 1E+00 | (1) | 8E-04 | 1E+00 | 1E+00 | -   |
| Myerson AACR 2001 Targets                                           | 4E-05 | 2E-01 | 7E-05 | 1E+00 | (3) | 7E-04 | 1E+00 | 1E+00 | -   |
| EGFR signaling via small GTPases                                    | 4E-05 | 2E-01 | 7E-05 | 1E+00 | (3) | 1E+00 | 1E+00 | 7E-03 | (2) |
| Development_EGFR signaling via PIP3                                 | 4E-05 | 2E-03 | 2E-02 | 1E+00 | 1   | 1E+00 | 1E+00 | 1E+00 | -   |
| Development_Slit-Robo signaling                                     | 4E-05 | 3E-01 | 2E-05 | 1E+00 | (4) | 7E-06 | 1E+00 | 1E-02 | (2) |
| Cell adhesion_PLAU signaling                                        | 4E-05 | 8E-03 | 6E-03 | 1E+00 | (0) | 4E-02 | 1E+00 | 1E+00 | -   |
| Inhibitory action of Lipoxins on neutrophil migration               | 4E-05 | 1E-03 | 4E-02 | 1E+00 | 1   | 1E-06 | 1E+00 | 1E+00 | -   |
| Jones et al 2008 KRAS signaling                                     | 6E-05 | 3E-03 | 2E-02 | 1E+00 | 1   | 9E-02 | 1E+00 | 2E-02 | (2) |
| Development_A1 receptor signaling                                   | 7E-05 | 1E-02 | 8E-03 | 1E+00 | (0) | 9E-09 | 1E+00 | 1E+00 | -   |
| Immune response_ICOS pathway in T-helper cell                       | 7E-05 | 1E-02 | 8E-03 | 1E+00 | (0) | 5E-03 | 1E+00 | 1E+00 | -   |
| Transcription_Ligand-Dependent Transcription of Retinoid-Target ge  | 7E-05 | 1E-02 | 8E-03 | 1E+00 | (0) | 5E-02 | 1E+00 | 1E+00 | -   |
| Neurophysiological process_Glutamate regulation of Dopamine D1A     | 8E-05 | 4E-03 | 2E-02 | 1E+00 | 1   | 1E-03 | 6E-02 | 1E+00 | 1   |
| Beta-2 adrenergic-dependent CFTR expression                         | 9E-05 | 3E-03 | 3E-02 | 1E+00 | 1   | 2E-02 | 1E+00 | 1E+00 | -   |
| Glycolysis and gluconeogenesis (short map)                          | 9E-05 | 3E-03 | 3E-02 | 1E+00 | 1   | 1E+00 | 1E+00 | 1E+00 | -   |
| Development_IGF-1 receptor signaling                                | 9E-05 | 2E-04 | 2E-01 | 1E+00 | 3   | 1E+00 | 1E+00 | 1E+00 | -   |
| Apoptosis and survival_Anti-apoptotic action of membrane-bound ES   | 1E-04 | 1E-02 | 1E-02 | 1E+00 | 0   | 1E+00 | 1E+00 | 1E+00 | -   |
| Development_A3 receptor signaling                                   | 1E-04 | 1E-02 | 9E-03 | 1E+00 | (0) | 2E-08 | 1E+00 | 1E+00 | -   |
| Development_Beta-adrenergic receptors regulation of ERK             | 1E-04 | 1E-02 | 9E-03 | 1E+00 | (0) | 2E-05 | 1E+00 | 1E+00 | -   |
| Development_Endothelin-1/EDNRA transactivation of EGFR              | 1E-04 | 1E-04 | 4E-01 | 1E+00 | 3   | 5E-02 | 1E+00 | 1E+00 | -   |
| Development_Growth hormone signaling via PI3K/AKT and MAPK cas      | 2E-04 | 4E-03 | 4E-02 | 1E+00 | 1   | 3E-02 | 1E+00 | 1E+00 | -   |
| Development_HGF signaling pathway                                   | 2E-04 | 4E-03 | 4E-02 | 1E+00 | 1   | 3E-02 | 1E+00 | 1E+00 | -   |
| Transcription_Androgen Receptor nuclear signaling                   | 2E-04 | 1E-02 | 1E-02 | 1E+00 | (0) | 6E-02 | 1E+00 | 1E+00 | -   |
| Cell adhesion_Gap junctions                                         | 2E-04 | 2E-03 | 8E-02 | 1E+00 | 2   | 1E+00 | 1E+00 | 1E+00 | -   |
| Cell adhesion_Tight junctions                                       | 2E-04 | 7E-03 | 3E-02 | 1E+00 | 1   | 2E-04 | 1E+00 | 1E+00 | -   |
| Regulation of CFTR activity (norm and CF)                           | 3E-04 | 2E-03 | 9E-02 | 1E+00 | 2   | 7E-02 | 5E-02 | 1E+00 | 1   |
| G-protein signaling_RhoA regulation pathway                         | 3E-04 | 5E-04 | 3E-01 | 1E+00 | 3   | 1E-04 | 1E+00 | 1E+00 | -   |
| Translation_Regulation of EIF2 activity                             | 3E-04 | 6E-03 | 4E-02 | 1E+00 | 1   | 1E+00 | 1E+00 | 1E+00 | -   |
| Transcription_Receptor-mediated HIF regulation                      | 3E-04 | 5E-04 | 3E-01 | 1E+00 | 3   | 1E+00 | 1E+00 | 1E+00 | -   |
| Signal transduction_Calcium signaling                               | 4E-04 | 3E-03 | 1E-01 | 1E+00 | 2   | 2E-06 | 1E+00 | 1E+00 | -   |
| Development_A2B receptor: action via G-protein alpha s              | 4E-04 | 2E-02 | 1E-02 | 1E+00 | (0) | 8E-04 | 1E+00 | 1E+00 | -   |
| Signal transduction_PKA signaling                                   | 4E-04 | 2E-02 | 1E-02 | 1E+00 | (0) | 1E-02 | 1E+00 | 1E+00 | -   |
| Development_A2A receptor signaling                                  | 5E-04 | 8E-03 | 5E-02 | 1E+00 | 1   | 2E-04 | 1E+00 | 1E+00 | -   |
| Regulation of VEGF expression in lung cancer                        | 5E-04 | 8E-03 | 5E-02 | 1E+00 | 1   | 3E-03 | 1E+00 | 1E+00 | -   |
| G-protein signaling_Rap1A regulation pathway                        | 5E-04 | 6E-02 | 6E-03 | 1E+00 | (1) | 4E-02 | 1E+00 | 1E+00 | -   |
| wtCFTR and deltaF508 traffic / Membrane expression (norm and CF)    | 5E-04 | 8E-03 | 5E-02 | 1E+00 | 1   | 4E-02 | 1E+00 | 1E+00 | -   |
| Development_EGFR signaling pathway                                  | 5E-04 | 8E-03 | 5E-02 | 1E+00 | 1   | 1E+00 | 1E+00 | 1E+00 | -   |
| ATP/ITP metabolism                                                  | 5E-04 | 2E-02 | 2E-02 | 1E+00 | (0) | 1E+00 | 1E+00 | 1E+00 | -   |
| Cytoskeleton remodeling_Keratin filaments                           | 5E-04 | 3E-03 | 1E-01 | 1E+00 | 2   | 1E+00 | 1E+00 | 1E+00 | -   |
| Development_MAG-dependent inhibition of neurite outgrowth           | 6E-04 | 3E-02 | 2E-02 | 1E+00 | (0) | 1E-05 | 1E+00 | 1E+00 | -   |
| G-protein signaling_Regulation of CDC42 activity                    | 6E-04 | 2E-03 | 2E-01 | 1E+00 | 2   | 2E-05 | 1E+00 | 1E+00 | -   |
| Regulation of CFTR gating (normal and CF)                           | 6E-04 | 2E-02 | 2E-02 | 1E+00 | (0) | 2E-02 | 1E+00 | 1E+00 | -   |
| Immune response_IL-4 signaling pathway                              | 6E-04 | 2E-03 | 2E-01 | 1E+00 | 2   | 1E+00 | 1E+00 | 1E+00 | -   |
| Immune response_IL-23 signaling pathway                             | 7E-04 | 6E-03 | 1E-01 | 1E+00 | 1   | 1E+00 | 1E+00 | 1E+00 | -   |
| WNT Signaling                                                       | 7E-04 | 2E-03 | 2E-01 | 1E+00 | 2   | 5E-04 | 1E+00 | 1E+00 | -   |
| Development_FGFR signaling pathway                                  | 7E-04 | 7E-02 | 8E-03 | 1E+00 | (1) | 5E-02 | 1E+00 | 1E+00 | -   |
| G-protein signaling_G-Protein alpha-s signaling cascades            | 7E-04 | 7E-02 | 8E-03 | 1E+00 | (1) | 5E-02 | 1E+00 | 1E+00 | -   |
| Immune response_IL-2 activation and signaling pathway               | 7E-04 | 1E-02 | 6E-02 | 1E+00 | 1   | 5E-02 | 1E+00 | 1E+00 | -   |
| Development_VEGF signaling via VEGFR2 - generic cascades            | 7E-04 | 1E-02 | 6E-02 | 1E+00 | 1   | 1E+00 | 1E+00 | 1E+00 | -   |

|                                                                                        |       |       |       |       |     |       |       |       |     |
|----------------------------------------------------------------------------------------|-------|-------|-------|-------|-----|-------|-------|-------|-----|
| Translation_Regulation of EIF4F activity                                               | 7E-04 | 1E-02 | 6E-02 | 1E+00 | 1   | 1E+00 | 1E+00 | 1E+00 | -   |
| Immune response_BCR pathway                                                            | 7E-04 | 1E-03 | 3E-01 | 1E+00 | 2   | 1E+00 | 1E+00 | 1E+00 | -   |
| Jones et al 2008 TGF-beta signaling                                                    | 9E-04 | 3E-02 | 2E-02 | 1E+00 | (0) | 1E-01 | 1E+00 | 1E+00 | -   |
| Immune response_Fc epsilon RI pathway                                                  | 1E-03 | 1E-02 | 7E-02 | 1E+00 | 1   | 5E-02 | 1E+00 | 1E+00 | -   |
| Immune response_CD28 signaling                                                         | 1E-03 | 1E-03 | 4E-01 | 1E+00 | 2   | 1E+00 | 1E+00 | 1E+00 | -   |
| Cytoskeleton remodeling_Fibronectin-binding integrins in cell motility                 | 1E-03 | 3E-03 | 2E-01 | 1E+00 | 2   | 1E-03 | 1E+00 | 1E+00 | -   |
| Development_Flt3 signaling                                                             | 1E-03 | 3E-02 | 3E-02 | 1E+00 | (0) | 2E-02 | 1E+00 | 1E+00 | -   |
| Immune response_IL-1 signaling pathway                                                 | 1E-03 | 3E-02 | 3E-02 | 1E+00 | (0) | 2E-02 | 1E+00 | 1E+00 | -   |
| Transcription_Role of VDR in regulation of genes involved in osteoporosis              | 1E-03 | 3E-02 | 3E-02 | 1E+00 | (0) | 2E-02 | 1E+00 | 1E+00 | -   |
| Mechanisms of CFTR activation by S-nitrosoglutathione (normal and disease)             | 1E-03 | 3E-03 | 2E-01 | 1E+00 | 2   | 1E+00 | 2E-02 | 7E-03 | (0) |
| Mechanisms of KRAS addiction in Lung Cancer Cells                                      | 1E-03 | 3E-02 | 3E-02 | 1E+00 | (0) | 1E+00 | 1E+00 | 7E-03 | (2) |
| Development_Angiopoietin - Tie2 signaling                                              | 1E-03 | 3E-03 | 2E-01 | 1E+00 | 2   | 1E+00 | 1E+00 | 1E+00 | -   |
| Immune response_TLR signaling pathways                                                 | 1E-03 | 3E-03 | 2E-01 | 1E+00 | 2   | 1E+00 | 1E+00 | 1E+00 | -   |
| Cytoskeleton remodeling_Role of PKA in cytoskeleton reorganisation                     | 1E-03 | 1E-01 | 1E-02 | 1E+00 | (1) | 2E-05 | 1E+00 | 1E+00 | -   |
| Cytoskeleton remodeling_Neurofilaments                                                 | 1E-03 | 1E-01 | 1E-02 | 1E+00 | (1) | 6E-02 | 1E+00 | 1E-02 | (2) |
| Cytoskeleton remodeling_FAK signaling                                                  | 1E-03 | 2E-03 | 4E-01 | 1E+00 | 2   | 6E-02 | 1E+00 | 1E+00 | -   |
| Cytoskeleton remodeling_Regulation of actin cytoskeleton by Rho GTPases                | 2E-03 | 2E-02 | 6E-02 | 1E+00 | 0   | 6E-06 | 1E+00 | 1E+00 | -   |
| Cell adhesion_Endothelial cell contacts by junctional mechanisms                       | 2E-03 | 6E-04 | 1E+00 | 1E+00 | 3   | 3E-06 | 1E+00 | 1E+00 | -   |
| G-protein signaling_Rap1B regulation pathway                                           | 2E-03 | 1E-01 | 1E-02 | 1E+00 | (1) | 7E-03 | 1E+00 | 1E+00 | -   |
| PGE2 and Disease                                                                       | 2E-03 | 1E-02 | 1E-01 | 1E+00 | 1   | 1E+00 | 1E+00 | 1E+00 | -   |
| G-protein signaling_Rac2 regulation pathway                                            | 2E-03 | 1E-02 | 1E-01 | 1E+00 | 1   | 1E+00 | 1E+00 | 1E+00 | -   |
| IL-1 beta-dependent CFTR expression                                                    | 2E-03 | 1E-02 | 1E-01 | 1E+00 | 1   | 1E+00 | 1E+00 | 1E+00 | -   |
| Immune response_IL-10 signaling pathway                                                | 2E-03 | 1E-02 | 1E-01 | 1E+00 | 1   | 1E+00 | 1E+00 | 1E+00 | -   |
| G-protein signaling_Regulation of p38 and JNK signaling mediated by Src family kinases | 2E-03 | 4E-02 | 4E-02 | 1E+00 | (0) | 5E-08 | 1E+00 | 1E+00 | -   |
| Development_ACM2 and ACM4 activation of ERK                                            | 2E-03 | 4E-02 | 4E-02 | 1E+00 | (0) | 2E-06 | 1E+00 | 1E+00 | -   |
| Mucin expression in CF via TLRs, EGFR signaling pathways                               | 2E-03 | 3E-01 | 4E-03 | 1E+00 | (2) | 3E-02 | 1E+00 | 1E+00 | -   |
| Transcription_Ligand-dependent activation of the ESR1/SP1 pathway                      | 2E-03 | 4E-02 | 4E-02 | 1E+00 | (0) | 3E-02 | 1E+00 | 1E+00 | -   |
| KRAS signaling                                                                         | 2E-03 | 3E-01 | 4E-03 | 1E+00 | (2) | 1E+00 | 1E+00 | 8E-03 | (2) |
| Putative role of Estrogen receptor and Androgen receptors signaling in prostate cancer | 2E-03 | 4E-02 | 4E-02 | 1E+00 | (0) | 1E+00 | 1E+00 | 1E+00 | -   |
| EMT in Disease                                                                         | 2E-03 | 4E-03 | 3E-01 | 1E+00 | 2   | 1E+00 | 1E+00 | 1E+00 | -   |
| Translation_Insulin regulation of translation                                          | 2E-03 | 4E-03 | 3E-01 | 1E+00 | 2   | 1E+00 | 1E+00 | 1E+00 | -   |
| Hedgehog signaling                                                                     | 2E-03 | 2E-03 | 4E-01 | 1E+00 | 2   | 7E-02 | 1E+00 | 1E+00 | -   |
| Immune response_NFAT in immune response                                                | 2E-03 | 2E-02 | 9E-02 | 1E+00 | 1   | 1E+00 | 1E+00 | 1E+00 | -   |
| Cell cycle_Role of APC in cell cycle regulation                                        | 3E-03 | 3E-01 | 5E-03 | 1E+00 | (2) | 3E-02 | 1E+00 | 1E+00 | -   |
| Development_Role of Activin A in cell differentiation and proliferation                | 3E-03 | 5E-02 | 4E-02 | 1E+00 | (0) | 3E-02 | 1E+00 | 1E+00 | -   |
| G-protein signaling_G-Protein alpha-i signaling cascades                               | 3E-03 | 5E-02 | 4E-02 | 1E+00 | (0) | 3E-02 | 1E+00 | 1E+00 | -   |
| PKC GPCR                                                                               | 3E-03 | 6E-03 | 3E-01 | 1E+00 | 2   | 3E-02 | 1E+00 | 1E+00 | -   |
| Retinol metabolism                                                                     | 3E-03 | 6E-03 | 3E-01 | 1E+00 | 2   | 3E-01 | 1E+00 | 1E+00 | -   |
| G-protein signaling_K-RAS regulation pathway                                           | 3E-03 | 3E-01 | 5E-03 | 1E+00 | (2) | 1E+00 | 1E+00 | 1E-02 | (2) |
| Development_NOTCH1-mediated pathway for NF-KB activity modulation                      | 3E-03 | 5E-02 | 4E-02 | 1E+00 | (0) | 1E+00 | 1E+00 | 1E+00 | -   |
| Development_VEGF-family signaling                                                      | 3E-03 | 5E-02 | 4E-02 | 1E+00 | (0) | 1E+00 | 1E+00 | 1E+00 | -   |
| Development_VEGF signaling and activation                                              | 3E-03 | 6E-03 | 3E-01 | 1E+00 | 2   | 1E+00 | 1E+00 | 1E+00 | -   |
| Cytoskeleton remodeling_Role of PDGFs in cell migration                                | 4E-03 | 6E-02 | 6E-02 | 1E+00 | 0   | 1E+00 | 1E+00 | 1E+00 | -   |
| Immune response_CCR3 signaling in eosinophils                                          | 4E-03 | 1E-01 | 2E-02 | 1E+00 | (1) | 1E-06 | 1E+00 | 1E+00 | -   |
| Transcription_Transcription factor Tubby signaling pathways                            | 4E-03 | 1E-03 | 1E+00 | 1E+00 | 3   | 1E-02 | 1E+00 | 1E+00 | -   |
| Development_Glucocorticoid receptor signaling                                          | 4E-03 | 1E-03 | 1E+00 | 1E+00 | 3   | 1E+00 | 2E-02 | 1E+00 | 2   |
| Proteolysis_Putative ubiquitin pathway                                                 | 4E-03 | 1E-03 | 1E+00 | 1E+00 | 3   | 1E+00 | 2E-02 | 1E+00 | 2   |
| Cytoskeleton remodeling_Reverse signaling by ephrin B                                  | 4E-03 | 2E-01 | 2E-02 | 1E+00 | (1) | 1E+00 | 1E+00 | 1E+00 | -   |
| Apoptosis and survival_Caspase cascade                                                 | 4E-03 | 2E-02 | 2E-01 | 1E+00 | 1   | 1E+00 | 1E+00 | 1E+00 | -   |
| Apoptosis and survival_NGF signaling pathway                                           | 4E-03 | 2E-02 | 2E-01 | 1E+00 | 1   | 1E+00 | 1E+00 | 1E+00 | -   |
| Cholesterol and Sphingolipids transport / Transport from Golgi and ER                  | 4E-03 | 2E-02 | 2E-01 | 1E+00 | 1   | 1E+00 | 1E+00 | 1E+00 | -   |
| Development_PDGF signaling via STATs and NF-kB                                         | 4E-03 | 2E-02 | 2E-01 | 1E+00 | 1   | 1E+00 | 1E+00 | 1E+00 | -   |
| Involvement of VEGF signaling in the progression of lung cancer                        | 4E-03 | 2E-02 | 2E-01 | 1E+00 | 1   | 1E+00 | 1E+00 | 1E+00 | -   |
| Development_Angiotensin signaling via PYK2                                             | 4E-03 | 8E-03 | 3E-01 | 1E+00 | 2   | 7E-06 | 1E+00 | 1E+00 | -   |
| vogelstein_04_hedgehog                                                                 | 4E-03 | 6E-02 | 5E-02 | 1E+00 | (0) | 4E-02 | 1E+00 | 1E+00 | -   |
| Development_Endothelin-1/EDNRA signaling                                               | 4E-03 | 6E-02 | 5E-02 | 1E+00 | (0) | 1E+00 | 1E+00 | 1E+00 | -   |
| Development_TGF-beta receptor signaling                                                | 4E-03 | 6E-02 | 5E-02 | 1E+00 | (0) | 1E+00 | 1E+00 | 1E+00 | -   |
| Transport_Clathrin-coated vesicle cycle                                                | 4E-03 | 1E-01 | 2E-02 | 1E+00 | (1) | 9E-02 | 1E+00 | 1E+00 | -   |
| Development_EDNRB signaling                                                            | 5E-03 | 7E-02 | 6E-02 | 1E+00 | (0) | 1E-05 | 1E+00 | 1E+00 | -   |
| Cell cycle_Spindle assembly and chromosome separation                                  | 5E-03 | 4E-01 | 8E-03 | 1E+00 | (2) | 5E-02 | 1E+00 | 1E+00 | -   |
| Immune response_IFN gamma signaling pathway                                            | 5E-03 | 7E-02 | 6E-02 | 1E+00 | (0) | 5E-02 | 1E+00 | 1E+00 | -   |
| Immune response_CD16 signaling in NK cells                                             | 5E-03 | 7E-02 | 6E-02 | 1E+00 | (0) | 5E-02 | 1E+00 | 1E+00 | -   |
| Signal transduction_IP3 signaling                                                      | 5E-03 | 1E-02 | 3E-01 | 1E+00 | 2   | 5E-02 | 1E+00 | 1E+00 | -   |
| Translation_Translation regulation by Alpha-1 adrenergic receptors                     | 5E-03 | 1E-02 | 3E-01 | 1E+00 | 2   | 5E-02 | 1E+00 | 1E+00 | -   |
| G-protein signaling_N-RAS regulation pathway                                           | 5E-03 | 4E-01 | 8E-03 | 1E+00 | (2) | 1E+00 | 1E+00 | 1E+00 | -   |
| Slit/Robo Signaling                                                                    | 6E-03 | 1E+00 | 2E-03 | 1E+00 | (3) | 5E-07 | 1E+00 | 1E+00 | -   |
| Inhibition of TGF-beta signaling in lung cancer                                        | 6E-03 | 2E-02 | 2E-01 | 1E+00 | 1   | 2E-05 | 1E+00 | 1E+00 | -   |
| EPO-induced MAPK pathway                                                               | 6E-03 | 1E+00 | 2E-03 | 1E+00 | (3) | 7E-04 | 1E+00 | 7E-03 | (2) |
| Apoptosis and survival_FAS signaling cascades                                          | 6E-03 | 2E-01 | 2E-02 | 1E+00 | (1) | 2E-02 | 1E+00 | 1E+00 | -   |
| Development_Dopamine D2 receptor transactivation of EGFR                               | 6E-03 | 2E-02 | 2E-01 | 1E+00 | 1   | 2E-02 | 1E+00 | 1E+00 | -   |
| Development_Activation of ERK by Alpha-1 adrenergic receptors                          | 6E-03 | 2E-02 | 2E-01 | 1E+00 | 1   | 2E-02 | 1E+00 | 1E+00 | -   |
| Development_Ligand-dependent activation of the ESR1/AP-1 pathway                       | 6E-03 | 2E-03 | 1E+00 | 1E+00 | 3   | 2E-02 | 1E+00 | 1E+00 | -   |
| CFTR folding and maturation (norm and CF)                                              | 6E-03 | 2E-03 | 1E+00 | 1E+00 | 3   | 1E+00 | 2E-02 | 1E+00 | 2   |
| Development_FGF-family signaling                                                       | 6E-03 | 2E-01 | 2E-02 | 1E+00 | (1) | 1E+00 | 1E+00 | 1E+00 | -   |
| Immune response_IL-22 signaling pathway                                                | 6E-03 | 2E-01 | 2E-02 | 1E+00 | (1) | 1E+00 | 1E+00 | 1E+00 | -   |
| Development_Thrombopoietin-regulated cell processes                                    | 6E-03 | 2E-02 | 2E-01 | 1E+00 | 1   | 1E+00 | 1E+00 | 1E+00 | -   |
| G-protein signaling_Cross-talk between Ras-family GTPases                              | 6E-03 | 2E-02 | 2E-01 | 1E+00 | 1   | 1E+00 | 1E+00 | 1E+00 | -   |
| Transcription_NF-kB signaling pathway                                                  | 6E-03 | 2E-03 | 1E+00 | 1E+00 | 3   | 1E+00 | 1E+00 | 1E+00 | -   |
| Signal transduction_Activation of PKC via G-Protein coupled receptor                   | 7E-03 | 1E-02 | 4E-01 | 1E+00 | 1   | 5E-02 | 1E+00 | 1E+00 | -   |



|                                                                       |       |       |       |       |     |       |       |       |     |
|-----------------------------------------------------------------------|-------|-------|-------|-------|-----|-------|-------|-------|-----|
| Regulation of G1/S transition                                         | 7E-03 | 1E-03 | 1E+00 | 1E+00 | 3   | 1E+00 | 1E+00 | 1E+00 | -   |
| Ras family GTPases in kinase cascades (scheme)                        | 1E-02 | 1E+00 | 3E-03 | 1E+00 | (3) | 2E-02 | 1E+00 | 7E-03 | (2) |
| Regulation of G1/S transition (part 2)                                | 1E-02 | 3E-02 | 2E-01 | 1E+00 | 1   | 2E-02 | 1E+00 | 7E-03 | (2) |
| CFTR-dependent regulation of ion channels in Airway Epithelium (nor   | 1E-02 | 3E-02 | 2E-01 | 1E+00 | 1   | 2E-02 | 1E+00 | 1E+00 | -   |
| Development_GDNF family signaling                                     | 1E-02 | 3E-02 | 2E-01 | 1E+00 | 1   | 1E+00 | 1E+00 | 1E+00 | -   |
| Development_PDGF signaling via MAPK cascades                          | 1E-02 | 3E-02 | 2E-01 | 1E+00 | 1   | 1E+00 | 1E+00 | 1E+00 | -   |
| G-protein signaling_H-RAS regulation pathway                          | 1E-02 | 3E-02 | 2E-01 | 1E+00 | 1   | 1E+00 | 1E+00 | 1E+00 | -   |
| Transcription_Sin3 and NuRD in transcription regulation               | 1E-02 | 3E-02 | 2E-01 | 1E+00 | 1   | 1E+00 | 1E+00 | 1E+00 | -   |
| Signal transduction_Activin A signaling regulation                    | 1E-02 | 3E-03 | 1E+00 | 1E+00 | 3   | 1E+00 | 1E+00 | 1E+00 | -   |
| G-protein signaling_Rap2B regulation pathway                          | 1E-02 | 6E-03 | 1E+00 | 1E+00 | 2   | 1E+00 | 1E+00 | 1E+00 | -   |
| Development_Angiotensin activation of ERK                             | 1E-02 | 4E-02 | 3E-01 | 1E+00 | 1   | 5E-08 | 1E+00 | 1E+00 | -   |
| Immune response_Role of Integrins in NK cells cytotoxicity            | 1E-02 | 3E-01 | 4E-02 | 1E+00 | (1) | 3E-02 | 1E+00 | 1E+00 | -   |
| Development_Alpha-2 adrenergic receptor activation of ERK             | 1E-02 | 4E-02 | 3E-01 | 1E+00 | 1   | 3E-02 | 1E+00 | 1E+00 | -   |
| Development_Prolactin receptor signaling                              | 1E-02 | 4E-02 | 3E-01 | 1E+00 | 1   | 1E+00 | 1E+00 | 1E+00 | -   |
| Cell adhesion_Cadherin-mediated cell adhesion                         | 2E-02 | 1E-02 | 1E+00 | 1E+00 | 2   | 3E-06 | 1E+00 | 1E+00 | -   |
| Inhibitory action of Lipoxins on Superoxide production in neutrophils | 2E-02 | 1E+00 | 1E-02 | 1E+00 | (2) | 2E-04 | 1E+00 | 1E+00 | -   |
| Anandamide biosynthesis and metabolism                                | 2E-02 | 1E-02 | 1E+00 | 1E+00 | 2   | 7E-03 | 1E+00 | 1E+00 | -   |
| Development_Angiotensin signaling via beta-Arrestin                   | 2E-02 | 1E-02 | 1E+00 | 1E+00 | 2   | 7E-03 | 1E+00 | 1E+00 | -   |
| Anti-apoptotic action of nuclear ESR1 and ESR2                        | 2E-02 | 1E+00 | 1E-02 | 1E+00 | (2) | 1E+00 | 1E+00 | 6E-03 | (2) |
| Bacterial infections in CF airways                                    | 2E-02 | 1E-01 | 1E-01 | 1E+00 | (0) | 1E+00 | 1E+00 | 1E+00 | -   |
| Cytoskeleton remodeling_RalA regulation pathway                       | 2E-02 | 1E-01 | 1E-01 | 1E+00 | (0) | 1E+00 | 1E+00 | 1E+00 | -   |
| G-protein signaling_TC21 regulation pathway                           | 2E-02 | 1E-01 | 1E-01 | 1E+00 | (0) | 1E+00 | 1E+00 | 1E+00 | -   |
| G-protein signaling_RAC1 in cellular process                          | 2E-02 | 1E-02 | 1E+00 | 1E+00 | 2   | 1E+00 | 1E+00 | 1E+00 | -   |
| Immune response_Oncostatin M signaling via MAPK in human cells        | 3E-02 | 3E-01 | 5E-02 | 1E+00 | (1) | 2E-04 | 1E+00 | 1E+00 | -   |
| Immune response_T cell receptor signaling pathway                     | 3E-02 | 7E-02 | 3E-01 | 1E+00 | 1   | 1E+00 | 1E+00 | 1E+00 | -   |
| Cell cycle (generic schema)                                           | 4E-02 | 2E-01 | 2E-01 | 1E+00 | (0) | 1E-02 | 1E+00 | 6E-03 | (2) |
| Immune response_IL-12-induced IFN-gamma production                    | 4E-02 | 2E-01 | 2E-01 | 1E+00 | (0) | 1E-02 | 1E+00 | 1E+00 | -   |
| Beta-alanine metabolism                                               | 4E-02 | 2E-02 | 1E+00 | 1E+00 | 2   | 1E-02 | 1E+00 | 1E+00 | -   |
| NO-dependent CFTR activation (normal and CF)                          | 4E-02 | 2E-01 | 2E-01 | 1E+00 | (0) | 1E+00 | 1E+00 | 6E-03 | (2) |
| Development_Leptin signaling via JAK/STAT and MAPK cascades           | 4E-02 | 1E+00 | 2E-02 | 1E+00 | (2) | 1E+00 | 1E+00 | 1E+00 | -   |
| Immune response_Antigen presentation by MHC class II                  | 4E-02 | 2E-01 | 2E-01 | 1E+00 | (0) | 1E+00 | 1E+00 | 1E+00 | -   |
| Immune response_IL-9 signaling pathway                                | 4E-02 | 2E-01 | 2E-01 | 1E+00 | (0) | 1E+00 | 1E+00 | 1E+00 | -   |
| Prostaglandin 2 biosynthesis and metabolism FM                        | 4E-02 | 2E-01 | 2E-01 | 1E+00 | (0) | 1E+00 | 1E+00 | 1E+00 | -   |
| Apoptosis and survival_TNFR1 signaling pathway                        | 4E-02 | 2E-02 | 1E+00 | 1E+00 | 2   | 1E+00 | 1E+00 | 1E+00 | -   |
| Cell Adhesion - Ephrin signaling                                      | 5E-02 | 2E-01 | 2E-01 | 1E+00 | (0) | 7E-04 | 1E+00 | 1E+00 | -   |
| Immune response_IL-3 activation and signaling pathway                 | 5E-02 | 2E-01 | 2E-01 | 1E+00 | (0) | 2E-02 | 1E+00 | 1E+00 | -   |
| Cell cycle_Regulation of G1/S transition (part 1)                     | 5E-02 | 2E-01 | 2E-01 | 1E+00 | (0) | 1E+00 | 1E+00 | 1E+00 | -   |
| G-protein signaling_M-RAS regulation pathway                          | 5E-02 | 2E-01 | 2E-01 | 1E+00 | (0) | 1E+00 | 1E+00 | 1E+00 | -   |
| Immune response_Bacterial infections in normal airways                | 5E-02 | 2E-01 | 2E-01 | 1E+00 | (0) | 1E+00 | 1E+00 | 1E+00 | -   |
| Immune response_Role of DAP12 receptors in NK cells                   | 5E-02 | 2E-01 | 2E-01 | 1E+00 | (0) | 1E+00 | 1E+00 | 1E+00 | -   |
| HETE and HPETE biosynthesis and metabolism                            | 5E-02 | 2E-02 | 1E+00 | 1E+00 | 2   | 1E+00 | 1E+00 | 1E+00 | -   |
| G-protein signaling_G-Protein alpha-q signaling cascades              | 7E-02 | 3E-02 | 1E+00 | 1E+00 | 1   | 4E-05 | 1E+00 | 1E+00 | -   |
| Immune response_Oncostatin M signaling via JAK-Stat in human cells    | 7E-02 | 2E-01 | 2E-01 | 1E+00 | (0) | 2E-02 | 1E+00 | 1E+00 | -   |
| NAD metabolism                                                        | 7E-02 | 3E-02 | 1E+00 | 1E+00 | 1   | 1E+00 | 2E-02 | 1E+00 | 2   |
| Inhibitory action of Lipoxins and Resolvin E1 on neutrophil functions | 8E-02 | 1E+00 | 6E-02 | 1E+00 | (1) | 8E-06 | 1E+00 | 1E+00 | -   |
| Cytoskeleton remodeling_RalB regulation pathway                       | 8E-02 | 1E+00 | 6E-02 | 1E+00 | (1) | 1E+00 | 1E+00 | 1E+00 | -   |
| Delta508-CFTR traffic / Sorting endosome formation in CF              | 8E-02 | 1E+00 | 6E-02 | 1E+00 | (1) | 1E+00 | 1E+00 | 1E+00 | -   |
| Methionine metabolism                                                 | 8E-02 | 1E+00 | 6E-02 | 1E+00 | (1) | 1E+00 | 1E+00 | 1E+00 | -   |
| Naphthalene metabolism                                                | 8E-02 | 1E+00 | 6E-02 | 1E+00 | (1) | 1E+00 | 1E+00 | 1E+00 | -   |
| Normal wtCFTR traffic / Sorting endosome formation                    | 8E-02 | 1E+00 | 6E-02 | 1E+00 | (1) | 1E+00 | 1E+00 | 1E+00 | -   |
| Saturated fatty acid biosynthesis                                     | 8E-02 | 1E+00 | 6E-02 | 1E+00 | (1) | 1E+00 | 1E+00 | 1E+00 | -   |
| wtCFTR and deltaF508 traffic / Late endosome and Lysosome (norm a     | 8E-02 | 1E+00 | 6E-02 | 1E+00 | (1) | 1E+00 | 1E+00 | 1E+00 | -   |
| Cytoskeleton remodeling_CDC42 in cellular processes                   | 8E-02 | 6E-02 | 1E+00 | 1E+00 | 1   | 1E+00 | 1E+00 | 1E+00 | -   |
| HCV-dependent transcription regulation leading to HCC                 | 8E-02 | 6E-02 | 1E+00 | 1E+00 | 1   | 1E+00 | 1E+00 | 1E+00 | -   |
| wtCFTR and delta508 traffic / Clathrin coated vesicles formation (nor | 9E-02 | 3E-01 | 3E-01 | 1E+00 | (0) | 1E+00 | 1E+00 | 1E+00 | -   |
| Galactose metabolism                                                  | 1E-01 | 3E-01 | 3E-01 | 1E+00 | (0) | 1E+00 | 3E-02 | 1E+00 | 2   |
| Cell cycle_Start of DNA replication in early S phase                  | 1E-01 | 1E+00 | 5E-02 | 1E+00 | (1) | 1E+00 | 1E+00 | 1E+00 | -   |
| Dichloroethylene metabolism                                           | 1E-01 | 1E+00 | 1E-01 | 1E+00 | (1) | 1E+00 | 1E+00 | 1E+00 | -   |
| Immune response_IFN alpha/beta signaling pathway                      | 1E-01 | 1E+00 | 1E-01 | 1E+00 | (1) | 1E+00 | 1E+00 | 1E+00 | -   |
| Hypoxian and EMT Disase                                               | 1E-01 | 1E-01 | 1E+00 | 1E+00 | 1   | 1E+00 | 1E+00 | 1E+00 | -   |
| Apoptosis and survival_Regulation of Apoptosis by Mitochondrial Pro   | 1E-01 | 1E-01 | 1E+00 | 1E+00 | 1   | 1E+00 | 1E+00 | 1E+00 | -   |
| Cytokine production by Th17 cells in CF (Mouse model)                 | 1E-01 | 1E-01 | 1E+00 | 1E+00 | 1   | 1E+00 | 1E+00 | 1E+00 | -   |
| G-protein signaling_Regulation of RAC1 activity                       | 1E-01 | 1E-01 | 1E+00 | 1E+00 | 1   | 1E+00 | 1E+00 | 1E+00 | -   |
| Immune response_IL-12 signaling pathway                               | 1E-01 | 1E-01 | 1E+00 | 1E+00 | 1   | 1E+00 | 1E+00 | 1E+00 | -   |
| Immune response_MIF-JAB1 signaling                                    | 1E-01 | 1E-01 | 1E+00 | 1E+00 | 1   | 1E+00 | 1E+00 | 1E+00 | -   |
| Delta508-CFTR traffic / ER-to-Golgi in CF                             | 2E-01 | 4E-01 | 3E-01 | 1E+00 | (0) | 5E-02 | 1E+00 | 1E+00 | -   |
| Normal wtCFTR traffic / ER-to-Golgi                                   | 2E-01 | 4E-01 | 3E-01 | 1E+00 | (0) | 5E-02 | 1E+00 | 1E+00 | -   |
| Apoptosis and survival_Apoptotic TNF-family pathways                  | 2E-01 | 1E-01 | 1E+00 | 1E+00 | 1   | 1E+00 | 1E+00 | 1E+00 | -   |
| G-protein signaling_RhoB regulation pathway                           | 2E-01 | 1E-01 | 1E+00 | 1E+00 | 1   | 1E+00 | 1E+00 | 1E+00 | -   |
| Immune response_Lectin induced complement pathway                     | 3E-01 | 1E+00 | 1E-01 | 1E+00 | (1) | 1E+00 | 1E+00 | 1E+00 | -   |
| DNA damage_NHEJ mechanisms of DSBs repair                             | 3E-01 | 2E-01 | 1E+00 | 1E+00 | 1   | 1E-02 | 1E+00 | 1E+00 | -   |
| Glycogen metabolism                                                   | 3E-01 | 1E+00 | 2E-01 | 1E+00 | (1) | 1E+00 | 1E+00 | 1E+00 | -   |
| Apoptosis and survival_APRIL and BAFF signaling                       | 3E-01 | 2E-01 | 1E+00 | 1E+00 | 1   | 1E+00 | 1E+00 | 1E+00 | -   |
| Apoptosis and survival_Anti-apoptotic TNFs/NF-kB/Bcl-2 pathway        | 3E-01 | 2E-01 | 1E+00 | 1E+00 | 1   | 1E+00 | 1E+00 | 1E+00 | -   |
| Immune response_Alternative complement pathway                        | 3E-01 | 5E-01 | 4E-01 | 1E+00 | (0) | 1E+00 | 1E+00 | 1E+00 | -   |
| Cell cycle_ESR1 regulation of G1/S transition                         | 3E-01 | 2E-01 | 1E+00 | 1E+00 | 1   | 2E-05 | 1E+00 | 1E+00 | -   |
| Cell cycle_Transition and termination of DNA replication              | 3E-01 | 1E+00 | 2E-01 | 1E+00 | (1) | 1E+00 | 1E+00 | 1E+00 | -   |
| Glutathione metabolism                                                | 3E-01 | 2E-01 | 1E+00 | 1E+00 | 1   | 1E+00 | 1E+00 | 1E+00 | -   |
| Tyrosine metabolism p.1 (dopamine)                                    | 3E-01 | 2E-01 | 1E+00 | 1E+00 | 1   | 1E+00 | 1E+00 | 1E+00 | -   |

|                                                                         |       |       |       |       |     |       |       |       |     |
|-------------------------------------------------------------------------|-------|-------|-------|-------|-----|-------|-------|-------|-----|
| Immune response_Antigen presentation by MHC class I                     | 4E-01 | 1E+00 | 2E-01 | 1E+00 | (1) | 1E+00 | 1E+00 | 1E+00 | -   |
| Cell cycle_Role of SCF complex in cell cycle regulation                 | 4E-01 | 3E-01 | 1E+00 | 1E+00 | 1   | 1E+00 | 1E+00 | 1E+00 | -   |
| Cell cycle_Chromosome condensation in prometaphase                      | 5E-01 | 1E+00 | 3E-01 | 1E+00 | (0) | 1E+00 | 1E+00 | 1E-02 | (2) |
| Immune response_Classical complement pathway                            | 6E-01 | 1E+00 | 4E-01 | 1E+00 | (0) | 1E+00 | 1E+00 | 1E+00 | -   |
| Mucin expression in CF via IL-6, IL-17 signaling pathways               | 1E+00 | 1E+00 | 1E+00 | 1E+00 | -   | 3E-03 | 1E+00 | 1E+00 | -   |
| 2-Naphthylamine and 2-Nitronaphthalene metabolism                       | 1E+00 | 1E+00 | 1E+00 | 1E+00 | -   | 1E-01 | 1E+00 | 1E+00 | -   |
| EMT                                                                     | 1E+00 | 1E+00 | 1E+00 | 1E+00 | -   | 1E+00 | 1E+00 | 1E+00 | -   |
| Acetaminophen metabolism                                                | 1E+00 | 1E+00 | 1E+00 | 1E+00 | -   | 1E+00 | 1E+00 | 1E+00 | -   |
| Androstenedione and testosterone biosynthesis and metabolism p.1        | 1E+00 | 1E+00 | 1E+00 | 1E+00 | -   | 1E+00 | 1E+00 | 1E+00 | -   |
| Apoptosis and survival_Anti-apoptotic TNFs/NF-kB/IAP pathway            | 1E+00 | 1E+00 | 1E+00 | 1E+00 | -   | 1E+00 | 1E+00 | 1E+00 | -   |
| Apoptosis and survival_Lymphotoxin-beta receptor signaling              | 1E+00 | 1E+00 | 1E+00 | 1E+00 | -   | 1E+00 | 1E+00 | 1E+00 | -   |
| Benzo[a]pyrene metabolism                                               | 1E+00 | 1E+00 | 1E+00 | 1E+00 | -   | 1E+00 | 1E+00 | 1E+00 | -   |
| CFTR translational fidelity (class I mutations)                         | 1E+00 | 1E+00 | 1E+00 | 1E+00 | -   | 1E+00 | 1E+00 | 1E+00 | -   |
| Chemotaxis_CXCR4 signaling pathway                                      | 1E+00 | 1E+00 | 1E+00 | 1E+00 | -   | 1E+00 | 1E+00 | 1E+00 | -   |
| Cholesterol and Sphingolipids transport / Distribution to the intracell | 1E+00 | 1E+00 | 1E+00 | 1E+00 | -   | 1E+00 | 1E+00 | 1E+00 | -   |
| Cholesterol and Sphingolipids transport / Generic schema (normal an     | 1E+00 | 1E+00 | 1E+00 | 1E+00 | -   | 1E+00 | 1E+00 | 1E+00 | -   |
| Cholesterol and Sphingolipids transport / Influx to the early endosom   | 1E+00 | 1E+00 | 1E+00 | 1E+00 | -   | 1E+00 | 1E+00 | 1E+00 | -   |
| Cholesterol and Sphingolipids transport / Recycling to plasma membr     | 1E+00 | 1E+00 | 1E+00 | 1E+00 | -   | 1E+00 | 1E+00 | 1E+00 | -   |
| Cytokine production by Th17 cells in CF                                 | 1E+00 | 1E+00 | 1E+00 | 1E+00 | -   | 1E+00 | 1E+00 | 1E+00 | -   |
| Development_EPO-induced Jak-STAT pathway                                | 1E+00 | 1E+00 | 1E+00 | 1E+00 | -   | 1E+00 | 1E+00 | 1E+00 | -   |
| Development_Thrombopoetin signaling via JAK-STAT pathway                | 1E+00 | 1E+00 | 1E+00 | 1E+00 | -   | 1E+00 | 1E+00 | 1E+00 | -   |
| Estradiol metabolism                                                    | 1E+00 | 1E+00 | 1E+00 | 1E+00 | -   | 1E+00 | 1E+00 | 1E+00 | -   |
| Estrogen biosynthesis                                                   | 1E+00 | 1E+00 | 1E+00 | 1E+00 | -   | 1E+00 | 1E+00 | 1E+00 | -   |
| Estrone metabolism                                                      | 1E+00 | 1E+00 | 1E+00 | 1E+00 | -   | 1E+00 | 1E+00 | 1E+00 | -   |
| Immune response_IL-6 signaling pathway                                  | 1E+00 | 1E+00 | 1E+00 | 1E+00 | -   | 1E+00 | 1E+00 | 1E+00 | -   |
| Immune response_MIF-mediated glucocorticoid regulation                  | 1E+00 | 1E+00 | 1E+00 | 1E+00 | -   | 1E+00 | 1E+00 | 1E+00 | -   |
| Immune response_TLR3 and TLR4 induce TICAM1-specific signaling p        | 1E+00 | 1E+00 | 1E+00 | 1E+00 | -   | 1E+00 | 1E+00 | 1E+00 | -   |
| Regulation of degradation of wt-CFTR                                    | 1E+00 | 1E+00 | 1E+00 | 1E+00 | -   | 1E+00 | 1E+00 | 1E+00 | -   |
| Vitamin D2 (ergocalciferol) metabolism                                  | 1E+00 | 1E+00 | 1E+00 | 1E+00 | -   | 1E+00 | 1E+00 | 1E+00 | -   |
| Lung Cancer General Scheme                                              | 1E+00 | 1E+00 | 1E+00 | 1E+00 | -   | 1E+00 | 1E+00 | 1E+00 | -   |

Supplementary Table 15. Mutation Type Distribution by Gene Set

| category                                                                   | Non-silent Mutations | Critical Mutations | Silent Mutations | Nonsilent/Silent Ratio | Critical/Silent Ratio | Nonsilent/Silent Pvalue | Critical/Silent Pvalue |
|----------------------------------------------------------------------------|----------------------|--------------------|------------------|------------------------|-----------------------|-------------------------|------------------------|
| KRAS signaling in pancreatic cancer                                        | 20                   | 15                 | 0                | Inf                    | Inf                   | 0.006                   | 0.002                  |
| EML4/ALK fusion protein in nonsmoking-related lung cancer                  | 19                   | 16                 | 0                | Inf                    | Inf                   | 0.008                   | 0.001                  |
| Bessarabova Breast Driver Mutations                                        | 70                   | 47                 | 9                | 7.8                    | 5.2                   | 0.008                   | 0.002                  |
| Cell adhesion_Plasmin signaling                                            | 18                   | 14                 | 0                | Inf                    | Inf                   | 0.010                   | 0.003                  |
| DNA damage_ATM/ATR regulation of G1/S checkpoint                           | 18                   | 14                 | 0                | Inf                    | Inf                   | 0.010                   | 0.003                  |
| Jones et al 2008 JNK                                                       | 18                   | 13                 | 0                | Inf                    | Inf                   | 0.010                   | 0.005                  |
| Signal transduction_JNK pathway                                            | 18                   | 13                 | 0                | Inf                    | Inf                   | 0.010                   | 0.005                  |
| Cell adhesion_ECM remodeling                                               | 23                   | 17                 | 1                | 23.0                   | 17.0                  | 0.017                   | 0.006                  |
| Bessarabova Pancreatic Driver Mutations                                    | 55                   | 42                 | 7                | 7.9                    | 6.0                   | 0.018                   | 0.002                  |
| Normal and pathological TGF-beta mediated regulation of cell proliferation | 15                   | 12                 | 0                | Inf                    | Inf                   | 0.021                   | 0.007                  |
| HBV-dependent NF-kB and PI3K/AKT pathways leading to HCC                   | 15                   | 12                 | 0                | Inf                    | Inf                   | 0.021                   | 0.007                  |
| Immune response_MIF in innate immunity response                            | 14                   | 12                 | 0                | Inf                    | Inf                   | 0.027                   | 0.007                  |
| Bessarabova Colon Driver Mutations                                         | 90                   | 48                 | 16               | 5.6                    | 3.0                   | 0.035                   | 0.084                  |
| JNK signaling                                                              | 25                   | 17                 | 2                | 12.5                   | 8.5                   | 0.038                   | 0.022                  |
| Jones et al 2008 DNA damage control                                        | 24                   | 19                 | 2                | 12.0                   | 9.5                   | 0.045                   | 0.011                  |
| DNA damage_DNA-damage-induced responses                                    | 12                   | 11                 | 0                | Inf                    | Inf                   | 0.046                   | 0.011                  |
| Jones et al 2008 Invasion                                                  | 192                  | 109                | 38               | 5.1                    | 2.9                   | 0.046                   | 0.023                  |
| Jones et al 2008 Integrin                                                  | 43                   | 28                 | 6                | 7.2                    | 4.7                   | 0.051                   | 0.030                  |
| Cell adhesion_Integrin-mediated cell adhesion and migration                | 38                   | 24                 | 5                | 7.6                    | 4.8                   | 0.053                   | 0.040                  |
| Cytoskeleton remodeling_Integrin outside-in signaling                      | 23                   | 18                 | 2                | 11.5                   | 9.0                   | 0.055                   | 0.016                  |
| Proteolysis_Role of Parkin in the Ubiquitin-Proteasomal Pathway            | 11                   | 10                 | 0                | Inf                    | Inf                   | 0.059                   | 0.016                  |
| RTK/RAS                                                                    | 87                   | 53                 | 17               | 5.1                    | 3.1                   | 0.073                   | 0.056                  |
| Apoptosis and survival_Role of CDK5 in neuronal death and survival         | 16                   | 13                 | 1                | 16.0                   | 13.0                  | 0.075                   | 0.025                  |
| Development_Neurotrophin family signaling                                  | 16                   | 11                 | 1                | 16.0                   | 11.0                  | 0.075                   | 0.050                  |
| Development_Leptin signaling via PI3K-dependent pathway                    | 10                   | 10                 | 0                | Inf                    | Inf                   | 0.076                   | 0.016                  |
| DNA damage                                                                 | 56                   | 39                 | 10               | 5.6                    | 3.9                   | 0.090                   | 0.029                  |
| Cell cycle_Role of 14-3-3 proteins in cell cycle regulation                | 15                   | 14                 | 1                | 15.0                   | 14.0                  | 0.093                   | 0.018                  |
| HGF signaling in pancreatic cancer                                         | 15                   | 13                 | 1                | 15.0                   | 13.0                  | 0.093                   | 0.025                  |
| DNA damage_Role of Brca1 and Brca2 in DNA repair                           | 15                   | 12                 | 1                | 15.0                   | 12.0                  | 0.093                   | 0.035                  |
| Tissue factor signaling in Lung Cancer                                     | 20                   | 16                 | 2                | 10.0                   | 8.0                   | 0.095                   | 0.030                  |
| wtCFTR and deltaF508 traffic / Membrane expression (norm and CF)           | 9                    | 9                  | 0                | Inf                    | Inf                   | 0.099                   | 0.024                  |
| Ding et al 2008 Lung Adenocarcinoma Pathway                                | 29                   | 23                 | 4                | 7.3                    | 5.8                   | 0.102                   | 0.024                  |
| Jones et al 2008 Apoptosis                                                 | 42                   | 32                 | 7                | 6.0                    | 4.6                   | 0.104                   | 0.023                  |
| DNA damage_Role of SUMO in p53 regulation                                  | 14                   | 13                 | 1                | 14.0                   | 13.0                  | 0.114                   | 0.025                  |

Supplementary Table 16. Core Cancer Pathway Summary Statistics

| PathwayLabel                                | Mutations/         |                   | Mutated                       |                            | Mutated                   |                           | % of                       |                               | % of Non-                     |                            | % of SCC                      |                           | % of ACO                  |                               | Nonsynony/                           |                                | Nonsynony/ |  |
|---------------------------------------------|--------------------|-------------------|-------------------------------|----------------------------|---------------------------|---------------------------|----------------------------|-------------------------------|-------------------------------|----------------------------|-------------------------------|---------------------------|---------------------------|-------------------------------|--------------------------------------|--------------------------------|------------|--|
|                                             | Mutated<br>Samples | Mutated<br>Sample | Mutated<br>Smokers<br>Samples | Non-<br>Smokers<br>Samples | Mutated<br>SCC<br>Samples | Mutated<br>Aco<br>Samples | % of<br>Samples<br>Mutated | Smokers<br>Samples<br>Mutated | Smokers<br>Samples<br>Mutated | % of<br>Samples<br>Mutated | Smokers<br>Samples<br>Mutated | % of<br>Sample<br>Mutated | % of<br>Sample<br>Mutated | Nonsynony/<br>Synony<br>Ratio | Nonsynony/<br>Synony<br>Ratio (3.28) | Nonsynony/<br>Synony<br>pvalue |            |  |
| DNA Damage Control                          | 14                 | 1.7               | 13                            | 1                          | 8                         | 6                         | 45                         | 48                            | 25                            | 67                         | 32                            | 18                        | 5.5                       | 0.003                         |                                      |                                |            |  |
| c-Jun N-terminal kinase signaling           | 13                 | 1.3               | 12                            | 1                          | 9                         | 4                         | 42                         | 44                            | 25                            | 75                         | 21                            | infinity                  | infinity                  | 0.006                         |                                      |                                |            |  |
| Invasion                                    | 21                 | 9.1               | 20                            | 1                          | 11                        | 10                        | 68                         | 74                            | 25                            | 92                         | 53                            | 5                         | 1.4                       | 0.035                         |                                      |                                |            |  |
| Integrin Signaling                          | 12                 | 3.6               | 12                            | 0                          | 7                         | 5                         | 39                         | 44                            | 0                             | 58                         | 26                            | 7                         | 2.0                       | 0.064                         |                                      |                                |            |  |
| Ding 2008 Lung Adenocarcinoma               | 17                 | 1.8               | 16                            | 1                          | 10                        | 7                         | 55                         | 59                            | 25                            | 83                         | 37                            | 7                         | 2.2                       | 0.088                         |                                      |                                |            |  |
| Apoptosis                                   | 18                 | 2.2               | 17                            | 1                          | 11                        | 7                         | 58                         | 63                            | 25                            | 92                         | 37                            | 6                         | 1.8                       | 0.100                         |                                      |                                |            |  |
| Regulation of G1/S Phase Transition         | 23                 | 6.3               | 21                            | 2                          | 12                        | 11                        | 74                         | 78                            | 50                            | 100                        | 58                            | 4                         | 1.2                       | 0.187                         |                                      |                                |            |  |
| KRAS Signaling                              | 9                  | 1.9               | 9                             | 0                          | 5                         | 4                         | 29                         | 33                            | 0                             | 42                         | 21                            | 6                         | 1.7                       | 0.280                         |                                      |                                |            |  |
| RTK/RAS                                     | 10                 | 1.2               | 10                            | 0                          | 7                         | 3                         | 32                         | 37                            | 0                             | 58                         | 16                            | 6                         | 1.8                       | 0.333                         |                                      |                                |            |  |
| Small GTPase-dependent signaling (not KRAS) | 23                 | 10.5              | 21                            | 2                          | 11                        | 12                        | 74                         | 78                            | 50                            | 92                         | 63                            | 3                         | 1.0                       | 0.496                         |                                      |                                |            |  |
| TGF-beta Signaling                          | 9                  | 1.7               | 9                             | 0                          | 4                         | 5                         | 29                         | 33                            | 0                             | 33                         | 26                            | 3                         | 0.9                       | 0.730                         |                                      |                                |            |  |
| Homophilic Cell Adhesion                    | 15                 | 4.9               | 15                            | 0                          | 8                         | 7                         | 48                         | 56                            | 0                             | 67                         | 37                            | 3                         | 0.9                       | 0.794                         |                                      |                                |            |  |
| Hedgehog Signaling                          | 6                  | 1.2               | 6                             | 0                          | 4                         | 2                         | 19                         | 22                            | 0                             | 33                         | 11                            | 2                         | 0.7                       | 0.814                         |                                      |                                |            |  |
| GPCR                                        | 7                  | 1.6               | 7                             | 0                          | 4                         | 3                         | 23                         | 26                            | 0                             | 33                         | 16                            | 2                         | 0.7                       | 0.815                         |                                      |                                |            |  |
| Notch/WNT Signaling                         | 12                 | 1.8               | 11                            | 1                          | 6                         | 6                         | 39                         | 41                            | 25                            | 50                         | 32                            | 2                         | 0.7                       | 0.883                         |                                      |                                |            |  |

Supplementary Table 17a:  
Drug × Druggable Target Matrix for Frequently Mutated Genes

| Drug × Druggable Target Matrix for Frequently Mutated Genes | Genes with Frequently Detected Mutations in This Experiment |       |      |      |      |      |      |      |      |      |       |       |       |       |       |       |       |       |       |       |       |       |       |       |       |       |       |       |       |       |       |       |       |       |       |       |       |       |       |       |       |       |       |       |       |       |       |       |       |       |       |       |       |       |       |       |       |       |       |       | Previously Identified Druggable Targets with Detected Mutations in This Experiment |       |       |       |       |       |       |       |       |       |       |       |       |       |       |       |       |       |       |       |       |       |       |       |       |       |       |       |       |       |       |       |       |       |       |       |       |       |       |       |        |        |        |        |        |        |        |        |        |        |        |        |        |        |        |        |        |        |        |        |        |        |        |        |        |        |        |        |        |        |        |        |        |        |        |        |        |        |        |        |        |        |        |        |        |        |        |        |        |        |        |        |        |        |        |        |        |        |        |        |        |        |        |        |        |        |        |        |        |        |        |        |        |        |        |        |        |        |        |        |        |        |        |        |        |        |        |        |        |        |        |        |        |        |        |        |        |        |        |        |        |        |        |        |        |        |        |        |        |        |        |        |        |        |        |        |        |        |        |        |        |        |        |        |        |        |        |        |        |        |        |        |        |        |        |        |        |        |        |        |        |        |        |        |        |        |        |        |        |        |        |        |        |        |        |        |        |        |        |        |        |        |        |        |        |        |        |        |        |        |        |        |        |        |        |        |        |        |        |        |        |        |        |        |        |        |        |        |        |        |        |        |        |        |        |        |        |        |        |        |        |        |        |        |        |        |        |        |        |        |        |        |        |        |        |        |        |        |        |        |        |        |        |        |        |        |        |        |        |        |        |        |        |        |        |        |        |        |        |        |        |        |        |        |        |        |        |        |        |        |        |        |        |        |        |        |        |        |        |        |        |        |        |        |        |        |        |        |        |        |        |        |        |        |        |        |        |        |        |        |        |        |        |        |        |        |        |        |        |        |        |        |        |        |        |        |        |        |        |        |        |        |        |        |        |        |        |        |        |        |        |        |        |        |        |        |        |        |        |        |        |        |        |        |        |        |        |        |        |        |        |        |        |        |        |        |        |        |        |        |        |        |        |        |        |        |        |        |        |        |        |        |        |        |        |        |        |        |        |        |        |        |        |        |        |        |        |        |        |        |        |        |        |        |        |        |        |        |        |        |        |        |        |        |        |        |        |        |        |        |        |        |        |        |        |        |        |        |        |        |        |        |        |        |        |        |        |        |        |        |        |        |        |        |        |        |        |        |        |        |        |        |        |        |        |        |        |        |        |        |        |        |        |        |        |        |        |        |        |        |        |        |        |        |        |        |        |        |        |        |        |        |        |        |        |        |        |        |        |        |        |        |        |        |        |        |        |        |        |        |        |        |        |        |        |        |        |        |        |        |        |        |        |        |        |        |        |        |        |        |        |        |        |        |        |        |        |        |        |        |        |        |        |        |        |        |        |        |        |        |        |        |        |        |        |        |        |        |        |        |        |        |        |        |        |        |        |        |        |        |        |        |        |        |        |        |        |        |        |        |        |        |        |        |        |        |        |        |        |        |        |        |        |        |        |        |        |        |        |        |        |        |        |        |        |        |        |        |        |        |        |        |        |        |        |        |        |        |        |        |        |        |        |        |        |        |        |        |        |        |        |        |        |        |        |        |        |        |        |        |        |        |        |        |        |        |        |        |        |        |        |        |        |        |        |        |        |        |        |        |        |        |        |        |        |        |        |        |        |        |        |        |        |        |        |        |        |        |        |        |        |        |        |        |        |        |        |        |        |        |        |        |        |        |        |        |        |        |        |        |        |        |        |        |        |        |        |        |        |        |        |        |        |        |        |        |        |        |        |        |        |        |        |        |        |        |        |        |        |        |        |        |        |        |        |        |        |        |        |        |        |        |        |        |        |        |        |        |        |        |        |        |        |        |        |        |        |        |        |        |        |        |        |        |        |        |        |        |        |        |        |        |        |        |        |        |        |        |        |        |        |        |        |        |        |        |        |        |        |        |        |        |        |        |        |        |        |        |        |        |        |        |        |        |        |        |        |        |        |        |        |        |        |        |        |        |        |        |        |        |        |        |        |        |        |        |        |        |        |        |        |        |        |        |        |        |        |        |        |        |        |        |        |        |        |        |        |        |        |        |        |        |        |        |        |        |        |        |        |        |        |        |        |        |        |        |        |        |        |        |        |        |        |        |        |        |        |        |        |        |        |        |        |        |        |        |        |        |        |        |        |        |        |        |        |        |        |        |        |        |        |        |        |        |        |        |        |        |        |        |        |        |        |        |        |        |        |        |        |        |        |        |        |        |        |        |        |        |        |        |        |        |        |        |        |        |        |        |        |        |         |         |         |         |         |         |         |         |         |         |         |         |         |         |         |         |         |         |         |         |         |         |         |         |         |         |         |         |         |         |         |         |         |         |         |         |         |         |         |         |         |         |         |         |         |         |         |         |         |         |         |         |         |         |         |         |         |         |         |         |         |         |         |         |         |         |         |         |         |         |         |         |         |         |         |         |         |         |         |         |         |         |         |         |         |         |         |         |         |         |         |         |         |         |         |         |         |         |         |         |         |         |         |         |         |         |         |         |         |         |         |         |         |         |         |         |         |         |         |         |         |         |         |         |         |         |         |         |         |         |         |         |         |         |         |         |         |         |         |         |         |         |         |         |         |         |         |         |         |         |         |         |         |         |         |         |         |         |         |         |         |         |         |         |         |         |         |         |         |         |         |         |         |         |         |         |         |         |         |         |         |         |         |         |         |         |         |         |         |         |         |         |         |         |         |         |         |         |         |         |         |         |         |         |         |         |         |         |         |         |         |
|-------------------------------------------------------------|-------------------------------------------------------------|-------|------|------|------|------|------|------|------|------|-------|-------|-------|-------|-------|-------|-------|-------|-------|-------|-------|-------|-------|-------|-------|-------|-------|-------|-------|-------|-------|-------|-------|-------|-------|-------|-------|-------|-------|-------|-------|-------|-------|-------|-------|-------|-------|-------|-------|-------|-------|-------|-------|-------|-------|-------|-------|-------|-------|-------|------------------------------------------------------------------------------------|-------|-------|-------|-------|-------|-------|-------|-------|-------|-------|-------|-------|-------|-------|-------|-------|-------|-------|-------|-------|-------|-------|-------|-------|-------|-------|-------|-------|-------|-------|-------|-------|-------|-------|-------|-------|-------|-------|-------|--------|--------|--------|--------|--------|--------|--------|--------|--------|--------|--------|--------|--------|--------|--------|--------|--------|--------|--------|--------|--------|--------|--------|--------|--------|--------|--------|--------|--------|--------|--------|--------|--------|--------|--------|--------|--------|--------|--------|--------|--------|--------|--------|--------|--------|--------|--------|--------|--------|--------|--------|--------|--------|--------|--------|--------|--------|--------|--------|--------|--------|--------|--------|--------|--------|--------|--------|--------|--------|--------|--------|--------|--------|--------|--------|--------|--------|--------|--------|--------|--------|--------|--------|--------|--------|--------|--------|--------|--------|--------|--------|--------|--------|--------|--------|--------|--------|--------|--------|--------|--------|--------|--------|--------|--------|--------|--------|--------|--------|--------|--------|--------|--------|--------|--------|--------|--------|--------|--------|--------|--------|--------|--------|--------|--------|--------|--------|--------|--------|--------|--------|--------|--------|--------|--------|--------|--------|--------|--------|--------|--------|--------|--------|--------|--------|--------|--------|--------|--------|--------|--------|--------|--------|--------|--------|--------|--------|--------|--------|--------|--------|--------|--------|--------|--------|--------|--------|--------|--------|--------|--------|--------|--------|--------|--------|--------|--------|--------|--------|--------|--------|--------|--------|--------|--------|--------|--------|--------|--------|--------|--------|--------|--------|--------|--------|--------|--------|--------|--------|--------|--------|--------|--------|--------|--------|--------|--------|--------|--------|--------|--------|--------|--------|--------|--------|--------|--------|--------|--------|--------|--------|--------|--------|--------|--------|--------|--------|--------|--------|--------|--------|--------|--------|--------|--------|--------|--------|--------|--------|--------|--------|--------|--------|--------|--------|--------|--------|--------|--------|--------|--------|--------|--------|--------|--------|--------|--------|--------|--------|--------|--------|--------|--------|--------|--------|--------|--------|--------|--------|--------|--------|--------|--------|--------|--------|--------|--------|--------|--------|--------|--------|--------|--------|--------|--------|--------|--------|--------|--------|--------|--------|--------|--------|--------|--------|--------|--------|--------|--------|--------|--------|--------|--------|--------|--------|--------|--------|--------|--------|--------|--------|--------|--------|--------|--------|--------|--------|--------|--------|--------|--------|--------|--------|--------|--------|--------|--------|--------|--------|--------|--------|--------|--------|--------|--------|--------|--------|--------|--------|--------|--------|--------|--------|--------|--------|--------|--------|--------|--------|--------|--------|--------|--------|--------|--------|--------|--------|--------|--------|--------|--------|--------|--------|--------|--------|--------|--------|--------|--------|--------|--------|--------|--------|--------|--------|--------|--------|--------|--------|--------|--------|--------|--------|--------|--------|--------|--------|--------|--------|--------|--------|--------|--------|--------|--------|--------|--------|--------|--------|--------|--------|--------|--------|--------|--------|--------|--------|--------|--------|--------|--------|--------|--------|--------|--------|--------|--------|--------|--------|--------|--------|--------|--------|--------|--------|--------|--------|--------|--------|--------|--------|--------|--------|--------|--------|--------|--------|--------|--------|--------|--------|--------|--------|--------|--------|--------|--------|--------|--------|--------|--------|--------|--------|--------|--------|--------|--------|--------|--------|--------|--------|--------|--------|--------|--------|--------|--------|--------|--------|--------|--------|--------|--------|--------|--------|--------|--------|--------|--------|--------|--------|--------|--------|--------|--------|--------|--------|--------|--------|--------|--------|--------|--------|--------|--------|--------|--------|--------|--------|--------|--------|--------|--------|--------|--------|--------|--------|--------|--------|--------|--------|--------|--------|--------|--------|--------|--------|--------|--------|--------|--------|--------|--------|--------|--------|--------|--------|--------|--------|--------|--------|--------|--------|--------|--------|--------|--------|--------|--------|--------|--------|--------|--------|--------|--------|--------|--------|--------|--------|--------|--------|--------|--------|--------|--------|--------|--------|--------|--------|--------|--------|--------|--------|--------|--------|--------|--------|--------|--------|--------|--------|--------|--------|--------|--------|--------|--------|--------|--------|--------|--------|--------|--------|--------|--------|--------|--------|--------|--------|--------|--------|--------|--------|--------|--------|--------|--------|--------|--------|--------|--------|--------|--------|--------|--------|--------|--------|--------|--------|--------|--------|--------|--------|--------|--------|--------|--------|--------|--------|--------|--------|--------|--------|--------|--------|--------|--------|--------|--------|--------|--------|--------|--------|--------|--------|--------|--------|--------|--------|--------|--------|--------|--------|--------|--------|--------|--------|--------|--------|--------|--------|--------|--------|--------|--------|--------|--------|--------|--------|--------|--------|--------|--------|--------|--------|--------|--------|--------|--------|--------|--------|--------|--------|--------|--------|--------|--------|--------|--------|--------|--------|--------|--------|--------|--------|--------|--------|--------|--------|--------|--------|--------|--------|--------|--------|--------|--------|--------|--------|--------|--------|--------|--------|--------|--------|--------|--------|--------|--------|--------|--------|--------|--------|--------|--------|--------|--------|--------|--------|--------|--------|--------|--------|--------|--------|--------|--------|--------|--------|--------|--------|--------|--------|--------|--------|--------|--------|--------|--------|--------|--------|--------|--------|--------|--------|--------|--------|--------|--------|--------|--------|--------|--------|--------|--------|--------|--------|--------|--------|--------|--------|--------|--------|--------|--------|--------|--------|--------|--------|--------|--------|--------|--------|--------|--------|--------|--------|--------|--------|--------|--------|--------|--------|--------|--------|--------|--------|--------|--------|--------|--------|--------|--------|--------|--------|--------|--------|--------|--------|--------|--------|--------|--------|--------|--------|--------|--------|--------|--------|--------|--------|--------|--------|--------|--------|--------|--------|--------|--------|--------|--------|--------|--------|--------|--------|--------|--------|--------|--------|--------|--------|--------|--------|--------|--------|--------|--------|--------|--------|--------|--------|--------|--------|--------|--------|--------|--------|--------|--------|--------|--------|--------|--------|--------|--------|--------|--------|--------|--------|--------|--------|--------|--------|--------|--------|--------|--------|--------|--------|--------|--------|--------|--------|--------|--------|--------|--------|--------|--------|--------|--------|--------|--------|--------|--------|--------|--------|--------|--------|--------|--------|--------|--------|--------|--------|--------|--------|--------|--------|--------|---------|---------|---------|---------|---------|---------|---------|---------|---------|---------|---------|---------|---------|---------|---------|---------|---------|---------|---------|---------|---------|---------|---------|---------|---------|---------|---------|---------|---------|---------|---------|---------|---------|---------|---------|---------|---------|---------|---------|---------|---------|---------|---------|---------|---------|---------|---------|---------|---------|---------|---------|---------|---------|---------|---------|---------|---------|---------|---------|---------|---------|---------|---------|---------|---------|---------|---------|---------|---------|---------|---------|---------|---------|---------|---------|---------|---------|---------|---------|---------|---------|---------|---------|---------|---------|---------|---------|---------|---------|---------|---------|---------|---------|---------|---------|---------|---------|---------|---------|---------|---------|---------|---------|---------|---------|---------|---------|---------|---------|---------|---------|---------|---------|---------|---------|---------|---------|---------|---------|---------|---------|---------|---------|---------|---------|---------|---------|---------|---------|---------|---------|---------|---------|---------|---------|---------|---------|---------|---------|---------|---------|---------|---------|---------|---------|---------|---------|---------|---------|---------|---------|---------|---------|---------|---------|---------|---------|---------|---------|---------|---------|---------|---------|---------|---------|---------|---------|---------|---------|---------|---------|---------|---------|---------|---------|---------|---------|---------|---------|---------|---------|---------|---------|---------|---------|---------|---------|---------|---------|---------|---------|---------|---------|---------|---------|---------|---------|---------|---------|---------|---------|---------|---------|---------|---------|---------|---------|---------|---------|---------|---------|
|                                                             | BRCA1                                                       | BRCA2 | TP53 | MDM2 | MDM4 | MDM5 | MDM6 | MDM7 | MDM8 | MDM9 | MDM10 | MDM11 | MDM12 | MDM13 | MDM14 | MDM15 | MDM16 | MDM17 | MDM18 | MDM19 | MDM20 | MDM21 | MDM22 | MDM23 | MDM24 | MDM25 | MDM26 | MDM27 | MDM28 | MDM29 | MDM30 | MDM31 | MDM32 | MDM33 | MDM34 | MDM35 | MDM36 | MDM37 | MDM38 | MDM39 | MDM40 | MDM41 | MDM42 | MDM43 | MDM44 | MDM45 | MDM46 | MDM47 | MDM48 | MDM49 | MDM50 | MDM51 | MDM52 | MDM53 | MDM54 | MDM55 | MDM56 | MDM57 | MDM58 | MDM59 | MDM60                                                                              | MDM61 | MDM62 | MDM63 | MDM64 | MDM65 | MDM66 | MDM67 | MDM68 | MDM69 | MDM70 | MDM71 | MDM72 | MDM73 | MDM74 | MDM75 | MDM76 | MDM77 | MDM78 | MDM79 | MDM80 | MDM81 | MDM82 | MDM83 | MDM84 | MDM85 | MDM86 | MDM87 | MDM88 | MDM89 | MDM90 | MDM91 | MDM92 | MDM93 | MDM94 | MDM95 | MDM96 | MDM97 | MDM98 | MDM99 | MDM100 | MDM101 | MDM102 | MDM103 | MDM104 | MDM105 | MDM106 | MDM107 | MDM108 | MDM109 | MDM110 | MDM111 | MDM112 | MDM113 | MDM114 | MDM115 | MDM116 | MDM117 | MDM118 | MDM119 | MDM120 | MDM121 | MDM122 | MDM123 | MDM124 | MDM125 | MDM126 | MDM127 | MDM128 | MDM129 | MDM130 | MDM131 | MDM132 | MDM133 | MDM134 | MDM135 | MDM136 | MDM137 | MDM138 | MDM139 | MDM140 | MDM141 | MDM142 | MDM143 | MDM144 | MDM145 | MDM146 | MDM147 | MDM148 | MDM149 | MDM150 | MDM151 | MDM152 | MDM153 | MDM154 | MDM155 | MDM156 | MDM157 | MDM158 | MDM159 | MDM160 | MDM161 | MDM162 | MDM163 | MDM164 | MDM165 | MDM166 | MDM167 | MDM168 | MDM169 | MDM170 | MDM171 | MDM172 | MDM173 | MDM174 | MDM175 | MDM176 | MDM177 | MDM178 | MDM179 | MDM180 | MDM181 | MDM182 | MDM183 | MDM184 | MDM185 | MDM186 | MDM187 | MDM188 | MDM189 | MDM190 | MDM191 | MDM192 | MDM193 | MDM194 | MDM195 | MDM196 | MDM197 | MDM198 | MDM199 | MDM200 | MDM201 | MDM202 | MDM203 | MDM204 | MDM205 | MDM206 | MDM207 | MDM208 | MDM209 | MDM210 | MDM211 | MDM212 | MDM213 | MDM214 | MDM215 | MDM216 | MDM217 | MDM218 | MDM219 | MDM220 | MDM221 | MDM222 | MDM223 | MDM224 | MDM225 | MDM226 | MDM227 | MDM228 | MDM229 | MDM230 | MDM231 | MDM232 | MDM233 | MDM234 | MDM235 | MDM236 | MDM237 | MDM238 | MDM239 | MDM240 | MDM241 | MDM242 | MDM243 | MDM244 | MDM245 | MDM246 | MDM247 | MDM248 | MDM249 | MDM250 | MDM251 | MDM252 | MDM253 | MDM254 | MDM255 | MDM256 | MDM257 | MDM258 | MDM259 | MDM260 | MDM261 | MDM262 | MDM263 | MDM264 | MDM265 | MDM266 | MDM267 | MDM268 | MDM269 | MDM270 | MDM271 | MDM272 | MDM273 | MDM274 | MDM275 | MDM276 | MDM277 | MDM278 | MDM279 | MDM280 | MDM281 | MDM282 | MDM283 | MDM284 | MDM285 | MDM286 | MDM287 | MDM288 | MDM289 | MDM290 | MDM291 | MDM292 | MDM293 | MDM294 | MDM295 | MDM296 | MDM297 | MDM298 | MDM299 | MDM300 | MDM301 | MDM302 | MDM303 | MDM304 | MDM305 | MDM306 | MDM307 | MDM308 | MDM309 | MDM310 | MDM311 | MDM312 | MDM313 | MDM314 | MDM315 | MDM316 | MDM317 | MDM318 | MDM319 | MDM320 | MDM321 | MDM322 | MDM323 | MDM324 | MDM325 | MDM326 | MDM327 | MDM328 | MDM329 | MDM330 | MDM331 | MDM332 | MDM333 | MDM334 | MDM335 | MDM336 | MDM337 | MDM338 | MDM339 | MDM340 | MDM341 | MDM342 | MDM343 | MDM344 | MDM345 | MDM346 | MDM347 | MDM348 | MDM349 | MDM350 | MDM351 | MDM352 | MDM353 | MDM354 | MDM355 | MDM356 | MDM357 | MDM358 | MDM359 | MDM360 | MDM361 | MDM362 | MDM363 | MDM364 | MDM365 | MDM366 | MDM367 | MDM368 | MDM369 | MDM370 | MDM371 | MDM372 | MDM373 | MDM374 | MDM375 | MDM376 | MDM377 | MDM378 | MDM379 | MDM380 | MDM381 | MDM382 | MDM383 | MDM384 | MDM385 | MDM386 | MDM387 | MDM388 | MDM389 | MDM390 | MDM391 | MDM392 | MDM393 | MDM394 | MDM395 | MDM396 | MDM397 | MDM398 | MDM399 | MDM400 | MDM401 | MDM402 | MDM403 | MDM404 | MDM405 | MDM406 | MDM407 | MDM408 | MDM409 | MDM410 | MDM411 | MDM412 | MDM413 | MDM414 | MDM415 | MDM416 | MDM417 | MDM418 | MDM419 | MDM420 | MDM421 | MDM422 | MDM423 | MDM424 | MDM425 | MDM426 | MDM427 | MDM428 | MDM429 | MDM430 | MDM431 | MDM432 | MDM433 | MDM434 | MDM435 | MDM436 | MDM437 | MDM438 | MDM439 | MDM440 | MDM441 | MDM442 | MDM443 | MDM444 | MDM445 | MDM446 | MDM447 | MDM448 | MDM449 | MDM450 | MDM451 | MDM452 | MDM453 | MDM454 | MDM455 | MDM456 | MDM457 | MDM458 | MDM459 | MDM460 | MDM461 | MDM462 | MDM463 | MDM464 | MDM465 | MDM466 | MDM467 | MDM468 | MDM469 | MDM470 | MDM471 | MDM472 | MDM473 | MDM474 | MDM475 | MDM476 | MDM477 | MDM478 | MDM479 | MDM480 | MDM481 | MDM482 | MDM483 | MDM484 | MDM485 | MDM486 | MDM487 | MDM488 | MDM489 | MDM490 | MDM491 | MDM492 | MDM493 | MDM494 | MDM495 | MDM496 | MDM497 | MDM498 | MDM499 | MDM500 | MDM501 | MDM502 | MDM503 | MDM504 | MDM505 | MDM506 | MDM507 | MDM508 | MDM509 | MDM510 | MDM511 | MDM512 | MDM513 | MDM514 | MDM515 | MDM516 | MDM517 | MDM518 | MDM519 | MDM520 | MDM521 | MDM522 | MDM523 | MDM524 | MDM525 | MDM526 | MDM527 | MDM528 | MDM529 | MDM530 | MDM531 | MDM532 | MDM533 | MDM534 | MDM535 | MDM536 | MDM537 | MDM538 | MDM539 | MDM540 | MDM541 | MDM542 | MDM543 | MDM544 | MDM545 | MDM546 | MDM547 | MDM548 | MDM549 | MDM550 | MDM551 | MDM552 | MDM553 | MDM554 | MDM555 | MDM556 | MDM557 | MDM558 | MDM559 | MDM560 | MDM561 | MDM562 | MDM563 | MDM564 | MDM565 | MDM566 | MDM567 | MDM568 | MDM569 | MDM570 | MDM571 | MDM572 | MDM573 | MDM574 | MDM575 | MDM576 | MDM577 | MDM578 | MDM579 | MDM580 | MDM581 | MDM582 | MDM583 | MDM584 | MDM585 | MDM586 | MDM587 | MDM588 | MDM589 | MDM590 | MDM591 | MDM592 | MDM593 | MDM594 | MDM595 | MDM596 | MDM597 | MDM598 | MDM599 | MDM600 | MDM601 | MDM602 | MDM603 | MDM604 | MDM605 | MDM606 | MDM607 | MDM608 | MDM609 | MDM610 | MDM611 | MDM612 | MDM613 | MDM614 | MDM615 | MDM616 | MDM617 | MDM618 | MDM619 | MDM620 | MDM621 | MDM622 | MDM623 | MDM624 | MDM625 | MDM626 | MDM627 | MDM628 | MDM629 | MDM630 | MDM631 | MDM632 | MDM633 | MDM634 | MDM635 | MDM636 | MDM637 | MDM638 | MDM639 | MDM640 | MDM641 | MDM642 | MDM643 | MDM644 | MDM645 | MDM646 | MDM647 | MDM648 | MDM649 | MDM650 | MDM651 | MDM652 | MDM653 | MDM654 | MDM655 | MDM656 | MDM657 | MDM658 | MDM659 | MDM660 | MDM661 | MDM662 | MDM663 | MDM664 | MDM665 | MDM666 | MDM667 | MDM668 | MDM669 | MDM670 | MDM671 | MDM672 | MDM673 | MDM674 | MDM675 | MDM676 | MDM677 | MDM678 | MDM679 | MDM680 | MDM681 | MDM682 | MDM683 | MDM684 | MDM685 | MDM686 | MDM687 | MDM688 | MDM689 | MDM690 | MDM691 | MDM692 | MDM693 | MDM694 | MDM695 | MDM696 | MDM697 | MDM698 | MDM699 | MDM700 | MDM701 | MDM702 | MDM703 | MDM704 | MDM705 | MDM706 | MDM707 | MDM708 | MDM709 | MDM710 | MDM711 | MDM712 | MDM713 | MDM714 | MDM715 | MDM716 | MDM717 | MDM718 | MDM719 | MDM720 | MDM721 | MDM722 | MDM723 | MDM724 | MDM725 | MDM726 | MDM727 | MDM728 | MDM729 | MDM730 | MDM731 | MDM732 | MDM733 | MDM734 | MDM735 | MDM736 | MDM737 | MDM738 | MDM739 | MDM740 | MDM741 | MDM742 | MDM743 | MDM744 | MDM745 | MDM746 | MDM747 | MDM748 | MDM749 | MDM750 | MDM751 | MDM752 | MDM753 | MDM754 | MDM755 | MDM756 | MDM757 | MDM758 | MDM759 | MDM760 | MDM761 | MDM762 | MDM763 | MDM764 | MDM765 | MDM766 | MDM767 | MDM768 | MDM769 | MDM770 | MDM771 | MDM772 | MDM773 | MDM774 | MDM775 | MDM776 | MDM777 | MDM778 | MDM779 | MDM780 | MDM781 | MDM782 | MDM783 | MDM784 | MDM785 | MDM786 | MDM787 | MDM788 | MDM789 | MDM790 | MDM791 | MDM792 | MDM793 | MDM794 | MDM795 | MDM796 | MDM797 | MDM798 | MDM799 | MDM800 | MDM801 | MDM802 | MDM803 | MDM804 | MDM805 | MDM806 | MDM807 | MDM808 | MDM809 | MDM810 | MDM811 | MDM812 | MDM813 | MDM814 | MDM815 | MDM816 | MDM817 | MDM818 | MDM819 | MDM820 | MDM821 | MDM822 | MDM823 | MDM824 | MDM825 | MDM826 | MDM827 | MDM828 | MDM829 | MDM830 | MDM831 | MDM832 | MDM833 | MDM834 | MDM835 | MDM836 | MDM837 | MDM838 | MDM839 | MDM840 | MDM841 | MDM842 | MDM843 | MDM844 | MDM845 | MDM846 | MDM847 | MDM848 | MDM849 | MDM850 | MDM851 | MDM852 | MDM853 | MDM854 | MDM855 | MDM856 | MDM857 | MDM858 | MDM859 | MDM860 | MDM861 | MDM862 | MDM863 | MDM864 | MDM865 | MDM866 | MDM867 | MDM868 | MDM869 | MDM870 | MDM871 | MDM872 | MDM873 | MDM874 | MDM875 | MDM876 | MDM877 | MDM878 | MDM879 | MDM880 | MDM881 | MDM882 | MDM883 | MDM884 | MDM885 | MDM886 | MDM887 | MDM888 | MDM889 | MDM890 | MDM891 | MDM892 | MDM893 | MDM894 | MDM895 | MDM896 | MDM897 | MDM898 | MDM899 | MDM900 | MDM901 | MDM902 | MDM903 | MDM904 | MDM905 | MDM906 | MDM907 | MDM908 | MDM909 | MDM910 | MDM911 | MDM912 | MDM913 | MDM914 | MDM915 | MDM916 | MDM917 | MDM918 | MDM919 | MDM920 | MDM921 | MDM922 | MDM923 | MDM924 | MDM925 | MDM926 | MDM927 | MDM928 | MDM929 | MDM930 | MDM931 | MDM932 | MDM933 | MDM934 | MDM935 | MDM936 | MDM937 | MDM938 | MDM939 | MDM940 | MDM941 | MDM942 | MDM943 | MDM944 | MDM945 | MDM946 | MDM947 | MDM948 | MDM949 | MDM950 | MDM951 | MDM952 | MDM953 | MDM954 | MDM955 | MDM956 | MDM957 | MDM958 | MDM959 | MDM960 | MDM961 | MDM962 | MDM963 | MDM964 | MDM965 | MDM966 | MDM967 | MDM968 | MDM969 | MDM970 | MDM971 | MDM972 | MDM973 | MDM974 | MDM975 | MDM976 | MDM977 | MDM978 | MDM979 | MDM980 | MDM981 | MDM982 | MDM983 | MDM984 | MDM985 | MDM986 | MDM987 | MDM988 | MDM989 | MDM990 | MDM991 | MDM992 | MDM993 | MDM994 | MDM995 | MDM996 | MDM997 | MDM998 | MDM999 | MDM1000 | MDM1001 | MDM1002 | MDM1003 | MDM1004 | MDM1005 | MDM1006 | MDM1007 | MDM1008 | MDM1009 | MDM1010 | MDM1011 | MDM1012 | MDM1013 | MDM1014 | MDM1015 | MDM1016 | MDM1017 | MDM1018 | MDM1019 | MDM1020 | MDM1021 | MDM1022 | MDM1023 | MDM1024 | MDM1025 | MDM1026 | MDM1027 | MDM1028 | MDM1029 | MDM1030 | MDM1031 | MDM1032 | MDM1033 | MDM1034 | MDM1035 | MDM1036 | MDM1037 | MDM1038 | MDM1039 | MDM1040 | MDM1041 | MDM1042 | MDM1043 | MDM1044 | MDM1045 | MDM1046 | MDM1047 | MDM1048 | MDM1049 | MDM1050 | MDM1051 | MDM1052 | MDM1053 | MDM1054 | MDM1055 | MDM1056 | MDM1057 | MDM1058 | MDM1059 | MDM1060 | MDM1061 | MDM1062 | MDM1063 | MDM1064 | MDM1065 | MDM1066 | MDM1067 | MDM1068 | MDM1069 | MDM1070 | MDM1071 | MDM1072 | MDM1073 | MDM1074 | MDM1075 | MDM1076 | MDM1077 | MDM1078 | MDM1079 | MDM1080 | MDM1081 | MDM1082 | MDM1083 | MDM1084 | MDM1085 | MDM1086 | MDM1087 | MDM1088 | MDM1089 | MDM1090 | MDM1091 | MDM1092 | MDM1093 | MDM1094 | MDM1095 | MDM1096 | MDM1097 | MDM1098 | MDM1099 | MDM1100 | MDM1101 | MDM1102 | MDM1103 | MDM1104 | MDM1105 | MDM1106 | MDM1107 | MDM1108 | MDM1109 | MDM1110 | MDM1111 | MDM1112 | MDM1113 | MDM1114 | MDM1115 | MDM1116 | MDM1117 | MDM1118 | MDM1119 | MDM1120 | MDM1121 | MDM1122 | MDM1123 | MDM1124 | MDM1125 | MDM1126 | MDM1127 | MDM1128 | MDM1129 | MDM1130 | MDM1131 | MDM1132 | MDM1133 | MDM1134 | MDM1135 | MDM1136 | MDM1137 | MDM1138 | MDM1139 | MDM1140 | MDM1141 | MDM1142 | MDM1143 | MDM1144 | MDM1145 | MDM1146 | MDM1147 | MDM1148 | MDM1149 | MDM1150 | MDM1151 | MDM1152 | MDM1153 | MDM1154 | MDM1155 | MDM1156 | MDM1157 | MDM1158 | MDM1159 | MDM1160 | MDM1161 | MDM1162 | MDM1163 | MDM1164 | MDM1165 | MDM1166 | MDM1167 | MDM1168 | MDM1169 | MDM1170 | MDM1171 | MDM1172 | MDM1173 | MDM1174 | MDM1175 | MDM1176 | MDM1177 | MDM1178 | MDM1179 | MDM1180 | MDM1181 | MDM1182 | MDM1183 | MDM1184 | MDM1185 | MDM1186 | MDM1187 | MDM1188 | MDM1189 | MDM1190 | MDM1191 | MDM1192 | MDM1193 | MDM1194 | MDM1195 | MDM1196 | MDM1197 | MDM1198 | MDM1199 | MDM1200 | MDM1201 | MDM1202 | MDM1203 | MDM1204 | MDM1205 | MDM1206 | MDM1207 | MDM1208 | MDM1209 | MDM1210 |
